# Supplementary material for: A comparative, correlate analysis and projection of global and regional life expectancy, healthy life expectancy, and their GAP: 1995-2025
Source: PubMed Central journal article supplement (PMC7568920; doi:10.7189/jogh.10.020407), 2020-12
Supplement: jogh-10-020407-s001.pdf [file jogh-10-020407-s001.pdf]

Table S1 Global and regional Life Expectancy, Healthy Life Expectancy, GAP and influencing factors

| Country     | Year | LE    | HALE  | GAP   | GDPPC   | HEPC  | HE   | OOP    | OOP   | PHE   | PHE  | PriHE | Urban | ODR   | TFR  | HFPerC | Wperc | GGE      | ICD      |
|-------------|------|-------|-------|-------|---------|-------|------|--------|-------|-------|------|-------|-------|-------|------|--------|-------|----------|----------|
|             |      |       |       |       |         |       | /GDP | /PHE   | /HE   | /HE   | /GDP | /GDP  |       |       |      |        |       |          |          |
| Afghanistan | 1995 | 51.05 | 43.28 | 7.77  | -       | -     | -    | -      | -     | -     | -    | -     | 19.76 | 4.67  | 7.61 | 20.60  | 21.50 | 11635.66 | 90877.27 |
|             | 1996 | 51.38 | 43.60 | 7.78  | -       | -     | -    | -      | -     | -     | -    | -     | 20.06 | 4.68  | 7.63 | 21.10  | 23.30 | 12505.93 | 90857.47 |
|             | 1997 | 51.11 | 43.41 | 7.69  | -       | -     | -    | -      | -     | -     | -    | -     | 20.36 | 4.67  | 7.64 | 21.70  | 25.00 | 13343.25 | 90842.43 |
|             | 1998 | 50.08 | 42.60 | 7.48  | -       | -     | -    | -      | -     | -     | -    | -     | 20.66 | 4.65  | 7.62 | 22.20  | 26.80 | 13793.37 | 90825.92 |
|             | 1999 | 51.52 | 43.79 | 7.73  | -       | -     | -    | -      | -     | -     | -    | -     | 20.97 | 4.61  | 7.57 | 22.80  | 28.50 | 14812.37 | 90838.68 |
|             | 2000 | 51.61 | 43.87 | 7.74  | -       | -     | -    | -      | -     | -     | -    | -     | 21.28 | 4.57  | 7.49 | 23.40  | 30.30 | 13530.95 | 90873.48 |
|             | 2001 | 51.66 | 43.99 | 7.68  | -       | -     | -    | -      | -     | -     | -    | -     | 21.60 | 4.52  | 7.39 | 23.90  | 32.00 | 12585.40 | 90864.12 |
|             | 2002 | 52.41 | 44.64 | 7.77  | 364.57  | 15.48 | 7.76 | 99.53  | 92.47 | 7.09  | 0.55 | 7.21  | 21.92 | 4.47  | 7.27 | 24.50  | 33.80 | 13842.74 | 90873.14 |
|             | 2003 | 53.01 | 45.16 | 7.85  | 376.76  | 19.33 | 8.82 | 99.55  | 92.69 | 6.90  | 0.61 | 8.21  | 22.24 | 4.43  | 7.14 | 25.10  | 35.50 | 14709.88 | 90871.68 |
|             | 2004 | 53.48 | 45.58 | 7.90  | 364.10  | 20.89 | 8.79 | 99.54  | 88.56 | 11.03 | 0.97 | 7.82  | 22.56 | 4.39  | 6.99 | 25.70  | 37.30 | 14654.37 | 90866.08 |
|             | 2005 | 53.85 | 45.91 | 7.94  | 389.42  | 21.90 | 8.07 | 99.52  | 89.63 | 9.94  | 0.80 | 7.27  | 22.90 | 4.36  | 6.83 | 26.30  | 39.10 | 14770.26 | 90857.52 |
|             | 2006 | 54.12 | 46.17 | 7.95  | 397.99  | 22.18 | 7.43 | 99.45  | 85.23 | 14.29 | 1.06 | 6.37  | 23.24 | 4.42  | 6.65 | 26.90  | 40.80 | 14849.16 | 90803.99 |
|             | 2007 | 54.54 | 46.53 | 8.01  | 440.37  | 26.99 | 6.73 | 99.49  | 7.76  | 7.76  | 0.52 | 6.21  | 23.59 | 4.47  | 6.46 | 27.40  | 42.60 | 15272.63 | 90764.35 |
|             | 2008 | 55.18 | 47.07 | 8.11  | 444.95  | 33.81 | 8.33 | 99.71  | 83.12 | 16.64 | 1.39 | 6.94  | 23.95 | 4.52  | 6.25 | 28.00  | 44.40 | 15288.78 | 90751.46 |
|             | 2009 | 55.67 | 47.47 | 8.19  | 524.82  | 43.53 | 9.42 | 99.68  | 72.31 | 27.46 | 2.59 | 6.83  | 24.31 | 4.57  | 6.04 | 28.70  | 46.20 | 15554.43 | 90753.39 |
|             | 2010 | 56.16 | 47.91 | 8.25  | 553.30  | 52.89 | 9.20 | 99.63  | 68.70 | 31.04 | 2.86 | 6.34  | 24.69 | 4.62  | 5.82 | 29.30  | 48.00 | 17791.33 | 90766.92 |
|             | 2011 | 56.67 | 48.33 | 8.34  | 569.23  | 52.38 | 7.87 | 99.56  | 73.26 | 26.42 | 2.08 | 5.79  | 25.07 | 4.65  | 5.60 | 29.90  | 49.80 | 17981.31 | 90803.94 |
|             | 2012 | 57.19 | 48.78 | 8.42  | 630.43  | 58.17 | 8.52 | 99.56  | 65.43 | 34.28 | 2.92 | 5.60  | 25.47 | 4.67  | 5.38 | 30.50  | 51.60 | -        | 90836.29 |
|             | 2013 | 57.67 | 49.18 | 8.49  | 621.82  | 53.37 | 8.13 | 99.56  | 67.13 | 32.58 | 2.65 | 5.48  | 25.87 | 4.70  | 5.17 | 31.10  | 53.40 | -        | 90855.94 |
|             | 2014 | 57.78 | 49.30 | 8.49  | 610.24  | 56.57 | 8.18 | 99.56  | 63.88 | 35.84 | 2.93 | 5.25  | 26.28 | 4.71  | 4.98 | 31.80  | 55.20 | -        | 90873.96 |
|             | 2015 | 57.84 | 49.36 | 8.48  | 599.14  | -     | -    | -      | -     | -     | -    | -     | 26.70 | 4.71  | 4.80 | 31.90  | 55.30 | -        | 90872.57 |
|             | 2016 | 57.95 | 49.49 | 8.46  | 596.26  | -     | -    | -      | -     | -     | -    | -     | 27.13 | 4.74  | -    | -      | -     | -        | 90859.25 |
|             | 2017 | 63.38 | 53.04 | 10.34 | -       | -     | -    | -      | -     | -     | -    | -     | -     | -     | -    | -      | -     | -        | -        |
| Albania     | 1995 | 74.05 | 64.73 | 9.32  | 1764.70 | 51.48 | 6.60 | 100.00 | 74.03 | 25.97 | 1.71 | 4.88  | 38.91 | 10.58 | 2.59 | 79.40  | 95.70 | 6421.57  | 90002.40 |

|      |       |       |       |         |        |      |       |       |       |      |      |       |       |      |       |       |         |          |
|------|-------|-------|-------|---------|--------|------|-------|-------|-------|------|------|-------|-------|------|-------|-------|---------|----------|
| 1996 | 74.21 | 64.87 | 9.34  | 1937.29 | 72.43  | 7.43 | 99.93 | 76.45 | 23.50 | 1.75 | 5.69 | 39.47 | 10.73 | 2.51 | 80.20 | 95.70 | 6187.38 | 90109.07 |
| 1997 | 72.33 | 63.33 | 9.00  | 1738.17 | 52.94  | 7.57 | 99.91 | 73.18 | 26.75 | 2.02 | 5.54 | 40.04 | 10.87 | 2.42 | 81.00 | 95.80 | 5500.61 | 90231.93 |
| 1998 | 74.20 | 64.90 | 9.29  | 1906.72 | 61.25  | 6.94 | 99.91 | 69.76 | 30.17 | 2.10 | 4.85 | 40.60 | 11.00 | 2.33 | 81.80 | 95.80 | 5246.13 | 90371.76 |
| 1999 | 74.23 | 64.95 | 9.29  | 2177.90 | 75.95  | 6.87 | 99.89 | 63.38 | 36.55 | 2.51 | 4.36 | 41.17 | 11.14 | 2.25 | 82.60 | 95.90 | 6493.49 | 90530.44 |
| 2000 | 74.26 | 65.02 | 9.24  | 2337.94 | 74.03  | 6.26 | 99.87 | 63.82 | 36.10 | 2.26 | 4.00 | 41.74 | 11.29 | 2.16 | 83.40 | 96.10 | 8389.28 | 90691.08 |
| 2001 | 74.31 | 65.06 | 9.24  | 2547.38 | 78.67  | 6.00 | 99.82 | 61.69 | 38.20 | 2.29 | 3.71 | 42.44 | 11.63 | 2.07 | 84.20 | 96.20 | 6820.62 | 90806.46 |
| 2002 | 74.35 | 65.12 | 9.23  | 2663.14 | 89.92  | 6.30 | 99.83 | 64.07 | 35.81 | 2.26 | 4.04 | 43.50 | 11.98 | 1.98 | 85.00 | 96.10 | 7503.06 | 90942.93 |
| 2003 | 74.43 | 65.20 | 9.22  | 2827.46 | 112.63 | 6.27 | 94.34 | 60.44 | 35.94 | 2.25 | 4.01 | 44.57 | 12.35 | 1.90 | 85.80 | 96.10 | 7834.02 | 91074.94 |
| 2004 | 74.57 | 65.33 | 9.23  | 3001.41 | 153.26 | 6.38 | 92.78 | 53.81 | 42.00 | 2.68 | 3.70 | 45.65 | 12.73 | 1.82 | 86.60 | 96.10 | 7401.10 | 91207.09 |
| 2005 | 74.77 | 65.55 | 9.21  | 3189.40 | 166.23 | 6.12 | 93.81 | 52.30 | 44.25 | 2.71 | 3.41 | 46.73 | 13.11 | 1.75 | 87.40 | 96.00 | 8308.39 | 91319.66 |
| 2006 | 75.02 | 65.76 | 9.26  | 3383.89 | 175.46 | 5.86 | 92.43 | 51.82 | 43.93 | 2.58 | 3.29 | 47.82 | 13.62 | 1.70 | 88.10 | 96.00 | 8027.15 | 91399.16 |
| 2007 | 75.27 | 65.89 | 9.38  | 3610.73 | 216.94 | 6.10 | 92.21 | 43.07 | 43.07 | 2.63 | 3.47 | 48.90 | 14.17 | 1.67 | 88.90 | 95.90 | 9879.39 | 91469.24 |
| 2008 | 75.44 | 66.03 | 9.42  | 3775.38 | 254.74 | 5.87 | 95.50 | 51.67 | 45.90 | 2.69 | 3.18 | 49.99 | 14.74 | 1.65 | 89.60 | 95.80 | 8136.79 | 91546.70 |
| 2009 | 75.75 | 66.26 | 9.49  | 3928.34 | 238.07 | 5.79 | 99.69 | 50.91 | 48.93 | 2.83 | 2.96 | 51.08 | 15.34 | 1.65 | 90.20 | 95.70 | 8108.81 | 91629.83 |
| 2010 | 76.18 | 66.67 | 9.51  | 4094.36 | 219.27 | 5.34 | 99.68 | 53.41 | 46.42 | 2.48 | 2.86 | 52.16 | 15.96 | 1.65 | 90.90 | 95.60 | 8507.00 | 91718.06 |
| 2011 | 76.56 | 66.87 | 9.68  | 4210.08 | 255.26 | 5.71 | 99.69 | 49.99 | 49.86 | 2.85 | 2.87 | 53.25 | 16.37 | 1.67 | 91.50 | 95.50 | 8712.30 | 91774.51 |
| 2012 | 76.85 | 67.09 | 9.75  | 4276.92 | 239.51 | 5.59 | 99.69 | 50.89 | 48.95 | 2.74 | 2.85 | 54.33 | 16.76 | 1.69 | 92.10 | 95.40 | 8898.64 | 91815.14 |
| 2013 | 77.07 | 67.27 | 9.80  | 4327.64 | 253.34 | 5.66 | 99.69 | 49.70 | 50.15 | 2.84 | 2.82 | 55.38 | 17.15 | 1.70 | 92.70 | 95.20 | -       | 91847.27 |
| 2014 | 77.27 | 67.43 | 9.84  | 4413.56 | 272.20 | 5.88 | 99.69 | 49.93 | 49.91 | 2.94 | 2.95 | 56.41 | 17.56 | 1.71 | 93.20 | 95.10 | -       | 91881.87 |
| 2015 | 77.44 | 67.55 | 9.89  | 4524.99 | -      | -    | -     | -     | -     | -    | -    | 57.41 | 18.05 | 1.71 | 93.20 | 95.10 | -       | 91908.52 |
| 2016 | 77.59 | 67.77 | 9.83  | 4684.97 | -      | -    | -     | -     | -     | -    | -    | 58.38 | 18.48 | -    | -     | -     | -       | 91912.23 |
| 2017 | 78.23 | 67.49 | 10.74 | -       | -      | -    | -     | -     | -     | -    | -    | -     | -     | -    | -     | -     | -       | -        |

|         |      |       |       |       |         |       |      |       |       |       |      |      |       |      |      |       |       |           |          |
|---------|------|-------|-------|-------|---------|-------|------|-------|-------|-------|------|------|-------|------|------|-------|-------|-----------|----------|
| Algeria | 1995 | 72.28 | 61.74 | 10.54 | 3223.56 | 53.87 | 3.70 | 97.04 | 26.95 | 72.23 | 2.67 | 1.03 | 56.00 | 6.45 | 3.45 | 81.70 | 91.20 | 123799.18 | 87788.58 |
|         | 1996 | 72.77 | 62.17 | 10.60 | 3297.86 | 53.45 | 3.35 | 96.49 | 24.40 | 74.71 | 2.50 | 0.85 | 56.77 | 6.55 | 3.21 | 82.10 | 90.90 | 123728.79 | 87821.24 |
|         | 1997 | 72.93 | 62.33 | 10.59 | 3281.10 | 57.94 | 3.59 | 96.72 | 28.02 | 71.03 | 2.55 | 1.04 | 57.54 | 6.67 | 2.99 | 82.50 | 90.50 | 123971.39 | 87868.29 |
|         | 1998 | 73.09 | 62.49 | 10.60 | 3397.41 | 57.09 | 3.59 | 97.12 | 28.81 | 70.34 | 2.53 | 1.07 | 58.31 | 6.79 | 2.80 | 82.90 | 90.20 | 126561.25 | 87918.71 |
|         | 1999 | 73.52 | 62.86 | 10.66 | 3457.14 | 54.29 | 3.43 | 97.00 | 29.68 | 69.41 | 2.38 | 1.05 | 59.12 | 6.93 | 2.64 | 83.30 | 89.90 | 132794.42 | 87980.34 |
|         | 2000 | 73.85 | 63.15 | 10.70 | 3541.07 | 61.30 | 3.49 | 96.72 | 25.79 | 73.33 | 2.56 | 0.93 | 59.92 | 7.06 | 2.51 | 83.60 | 89.50 | 133778.20 | 88059.50 |
|         | 2001 | 74.10 | 63.36 | 10.74 | 3600.44 | 66.51 | 3.84 | 96.01 | 21.67 | 77.43 | 2.97 | 0.87 | 60.71 | 7.15 | 2.44 | 84.00 | 89.20 | 129334.83 | 88128.42 |

|          |       |       |       |         |          |      |       |       |       |      |      |       |      |      |       |        |           |          |
|----------|-------|-------|-------|---------|----------|------|-------|-------|-------|------|------|-------|------|------|-------|--------|-----------|----------|
| 2002     | 74.42 | 63.63 | 10.79 | 3754.52 | 66.18    | 3.73 | 95.72 | 22.52 | 76.47 | 2.85 | 0.88 | 61.50 | 7.23 | 2.40 | 84.30 | 88.80  | 131222.65 | 88191.02 |
| 2003     | 74.53 | 63.72 | 10.81 | 3974.18 | 75.44    | 3.60 | 95.34 | 21.15 | 77.82 | 2.80 | 0.80 | 62.28 | 7.31 | 2.41 | 84.70 | 88.50  | 139592.33 | 88301.96 |
| 2004     | 75.04 | 64.13 | 10.91 | 4091.14 | 92.15    | 3.54 | 94.58 | 26.09 | 72.41 | 2.57 | 0.98 | 63.06 | 7.40 | 2.44 | 85.00 | 88.10  | 139846.68 | 88424.68 |
| 2005     | 75.35 | 64.41 | 10.94 | 4273.31 | 100.36   | 3.24 | 95.18 | 28.09 | 70.48 | 2.28 | 0.95 | 63.83 | 7.49 | 2.50 | 85.30 | 87.70  | 146241.50 | 88564.48 |
| 2006     | 75.62 | 64.63 | 10.99 | 4282.33 | 116.34   | 3.36 | 95.76 | 29.12 | 69.59 | 2.33 | 1.02 | 64.59 | 7.59 | 2.58 | 85.60 | 87.40  | 151655.37 | 88668.38 |
| 2007     | 75.86 | 64.77 | 11.09 | 4359.38 | 150.55   | 3.82 | 96.19 | 70.80 | 70.80 | 2.71 | 1.12 | 65.35 | 7.70 | 2.66 | 85.80 | 87.00  | 157333.43 | 88786.05 |
| 2008     | 76.11 | 64.96 | 11.16 | 4390.50 | 206.41   | 4.20 | 96.45 | 26.15 | 72.89 | 3.06 | 1.14 | 66.10 | 7.82 | 2.75 | 86.10 | 86.60  | 160415.28 | 88916.01 |
| 2009     | 76.31 | 65.10 | 11.21 | 4386.04 | 207.72   | 5.36 | 96.69 | 27.45 | 71.61 | 3.84 | 1.52 | 66.82 | 7.96 | 2.83 | 86.40 | 86.20  | 160849.93 | 89036.78 |
| 2010     | 76.54 | 65.32 | 11.23 | 4463.39 | 228.92   | 5.12 | 96.98 | 28.88 | 70.22 | 3.59 | 1.52 | 67.53 | 8.12 | 2.89 | 86.60 | 85.70  | 167674.63 | 89181.14 |
| 2011     | 76.70 | 65.41 | 11.29 | 4504.92 | 286.97   | 5.29 | 97.23 | 27.87 | 71.34 | 3.78 | 1.52 | 68.21 | 8.23 | 2.93 | 86.80 | 85.30  | 172303.51 | 89278.94 |
| 2012     | 76.84 | 65.54 | 11.30 | 4564.44 | 335.27   | 6.14 | 97.28 | 25.70 | 73.58 | 4.52 | 1.62 | 68.87 | 8.34 | 2.94 | 87.00 | 84.90  | 176471.23 | 89391.81 |
| 2013     | 76.97 | 65.66 | 11.32 | 4596.22 | 345.65   | 7.12 | 97.28 | 26.44 | 72.83 | 5.19 | 1.94 | 69.51 | 8.49 | 2.92 | 87.20 | 84.50  | -         | 89491.59 |
| 2014     | 77.09 | 65.75 | 11.34 | 4675.89 | 361.73   | 7.21 | 97.28 | 26.50 | 72.76 | 5.24 | 1.96 | 70.13 | 8.69 | 2.89 | 87.40 | 84.00  | -         | 89603.76 |
| 2015     | 77.27 | 65.90 | 11.37 | 4759.60 | -        | -    | -     | -     | -     | -    | -    | 70.73 | 8.96 | 2.84 | 87.60 | 83.60  | -         | 89712.75 |
| 2016     | 77.41 | 66.07 | 11.34 | 4827.72 | -        | -    | -     | -     | -     | -    | -    | 71.30 | 9.27 | -    | -     | -      | -         | 89826.16 |
| 2017     | 77.74 | 66.48 | 11.25 | -       | -        | -    | -     | -     | -     | -    | -    | -     | -    | -    | -     | -      | -         | -        |
| American | 1995  | 70.75 | 61.42 | 9.32    | -        | -    | -     | -     | -     | -    | -    | 85.28 | -    | -    | 61.10 | 95.70  | 22.88     | 83944.90 |
|          | 1996  | 70.79 | 61.45 | 9.34    | -        | -    | -     | -     | -     | -    | -    | 86.04 | -    | -    | 61.20 | 96.10  | 23.26     | 84029.44 |
|          | 1997  | 70.86 | 61.49 | 9.37    | -        | -    | -     | -     | -     | -    | -    | 86.77 | -    | -    | 61.30 | 96.50  | 23.62     | 84124.08 |
|          | 1998  | 71.04 | 61.61 | 9.43    | -        | -    | -     | -     | -     | -    | -    | 87.47 | -    | -    | 61.40 | 96.90  | 23.93     | 84212.12 |
|          | 1999  | 71.29 | 61.77 | 9.52    | -        | -    | -     | -     | -     | -    | -    | 88.13 | -    | -    | 61.50 | 97.40  | 31.14     | 84300.27 |
|          | 2000  | 71.53 | 61.94 | 9.59    | -        | -    | -     | -     | -     | -    | -    | 88.59 | -    | -    | 61.50 | 97.80  | 47.66     | 84419.78 |
|          | 2001  | 71.61 | 62.01 | 9.61    | -        | -    | -     | -     | -     | -    | -    | 88.49 | -    | -    | 61.60 | 98.20  | 50.88     | 84519.33 |
|          | 2002  | 71.61 | 62.01 | 9.59    | 10613.91 | -    | -     | -     | -     | -    | -    | 88.39 | -    | -    | 61.70 | 98.60  | 51.35     | 84627.16 |
|          | 2003  | 71.34 | 61.80 | 9.53    | 10630.45 | -    | -     | -     | -     | -    | -    | 88.30 | -    | -    | 61.80 | 99.00  | 51.84     | 84749.89 |
|          | 2004  | 71.52 | 61.96 | 9.56    | 10661.17 | -    | -     | -     | -     | -    | -    | 88.20 | -    | -    | 61.80 | 99.40  | 52.32     | 84885.73 |
|          | 2005  | 71.63 | 62.05 | 9.57    | 10644.58 | -    | -     | -     | -     | -    | -    | 88.10 | -    | -    | 61.90 | 99.90  | 52.80     | 85041.40 |
|          | 2006  | 71.73 | 62.15 | 9.58    | 10282.46 | -    | -     | -     | -     | -    | -    | 88.00 | -    | -    | 62.00 | 100.00 | 53.30     | 85144.85 |
|          | 2007  | 71.90 | 62.27 | 9.64    | 10619.61 | -    | -     | -     | -     | -    | -    | 87.90 | -    | -    | 62.10 | 100.00 | 53.91     | 85249.63 |

|      |       |       |      |          |   |   |   |   |   |   |   |   |       |   |   |       |        |       |          |
|------|-------|-------|------|----------|---|---|---|---|---|---|---|---|-------|---|---|-------|--------|-------|----------|
| 2008 | 72.19 | 62.50 | 9.70 | 10500.39 | - | - | - | - | - | - | - | - | 87.80 | - | - | 62.10 | 100.00 | 54.62 | 85376.09 |
| 2009 | 70.89 | 61.43 | 9.46 | 10199.06 | - | - | - | - | - | - | - | - | 87.70 | - | - | 62.20 | 100.00 | 54.99 | 85498.04 |
| 2010 | 72.36 | 62.66 | 9.71 | 10352.82 | - | - | - | - | - | - | - | - | 87.59 | - | - | 62.30 | 100.00 | 56.64 | 85615.61 |
| 2011 | 72.19 | 62.51 | 9.68 | 10442.73 | - | - | - | - | - | - | - | - | 87.50 | - | - | 62.40 | 100.00 | 57.74 | 85773.99 |
| 2012 | 72.21 | 62.52 | 9.69 | 10000.31 | - | - | - | - | - | - | - | - | 87.41 | - | - | 62.50 | 100.00 | 58.77 | 85941.26 |
| 2013 | 72.15 | 62.46 | 9.69 | 9711.11  | - | - | - | - | - | - | - | - | 87.33 | - | - | 62.50 | 100.00 | -     | 86098.58 |
| 2014 | 72.21 | 62.50 | 9.71 | 9779.88  | - | - | - | - | - | - | - | - | 87.26 | - | - | 62.50 | 100.00 | -     | 86255.90 |
| 2015 | 72.25 | 62.52 | 9.73 | 9884.11  | - | - | - | - | - | - | - | - | 87.20 | - | - | 62.50 | 100.00 | -     | 86419.14 |
| 2016 | 72.39 | 62.64 | 9.75 | 9614.47  | - | - | - | - | - | - | - | - | 87.15 | - | - | -     | -      | -     | 86586.95 |
| 2017 | 71.83 | 62.12 | 9.71 | -        | - | - | - | - | - | - | - | - | -     | - | - | -     | -      | -     | -        |

|         |      |       |       |       |          |         |       |       |       |       |      |      |       |   |      |        |        |   |          |
|---------|------|-------|-------|-------|----------|---------|-------|-------|-------|-------|------|------|-------|---|------|--------|--------|---|----------|
| Andorra | 1995 | 80.45 | 69.48 | 10.97 | 32917.65 | 1282.52 | 5.81  | 71.41 | 22.44 | 68.57 | 3.98 | 1.83 | 93.66 | - | -    | 100.00 | 100.00 | - | 92570.86 |
|         | 1996 | 80.78 | 69.75 | 11.03 | 34175.26 | 1386.66 | 6.09  | 69.58 | 21.22 | 69.50 | 4.24 | 1.86 | 93.43 | - | -    | 100.00 | 100.00 | - | 92546.96 |
|         | 1997 | 81.11 | 70.02 | 11.09 | 37293.28 | 1395.52 | 6.14  | 69.71 | 20.96 | 69.93 | 4.30 | 1.85 | 93.18 | - | -    | 100.00 | 100.00 | - | 92558.30 |
|         | 1998 | 81.41 | 70.26 | 11.15 | 38595.72 | 1831.21 | 7.76  | 63.33 | 16.48 | 73.98 | 5.74 | 2.02 | 92.93 | - | -    | 100.00 | 100.00 | - | 92602.84 |
|         | 1999 | 81.69 | 70.48 | 11.21 | 40035.48 | 1369.16 | 5.73  | 71.11 | 22.28 | 68.67 | 3.93 | 1.79 | 92.67 | - | -    | 100.00 | 100.00 | - | 92648.10 |
|         | 2000 | 81.94 | 70.67 | 11.27 | 40801.54 | 1242.21 | 5.78  | 70.74 | 22.08 | 68.78 | 3.98 | 1.80 | 92.40 | - | -    | 100.00 | 100.00 | - | 92700.31 |
|         | 2001 | 82.19 | 70.87 | 11.32 | 41420.85 | 1268.63 | 5.79  | 70.00 | 21.88 | 68.75 | 3.98 | 1.81 | 92.06 | - | -    | 100.00 | 100.00 | - | 92739.82 |
|         | 2002 | 82.43 | 71.06 | 11.37 | 42396.30 | 1450.80 | 5.97  | 70.59 | 22.02 | 68.81 | 4.11 | 1.86 | 91.64 | - | -    | 100.00 | 100.00 | - | 92794.84 |
|         | 2003 | 82.51 | 71.12 | 11.38 | 45519.49 | 1827.84 | 5.75  | 71.36 | 22.34 | 68.69 | 3.95 | 1.80 | 91.21 | - | -    | 100.00 | 100.00 | - | 92897.97 |
|         | 2004 | 82.43 | 71.08 | 11.35 | 47032.87 | 2127.74 | 5.70  | 72.20 | 22.63 | 68.66 | 3.92 | 1.79 | 90.75 | - | -    | 100.00 | 100.00 | - | 93008.42 |
|         | 2005 | 82.54 | 71.16 | 11.38 | 48831.93 | 2089.67 | 5.22  | 72.84 | 24.59 | 66.24 | 3.46 | 1.76 | 90.30 | - | -    | 100.00 | 100.00 | - | 93076.79 |
|         | 2006 | 82.63 | 71.23 | 11.40 | 49708.40 | 2256.10 | 5.31  | 72.98 | 24.00 | 67.11 | 3.57 | 1.75 | 89.84 | - | 1.24 | 100.00 | 100.00 | - | 93125.90 |
|         | 2007 | 82.71 | 71.29 | 11.42 | 48710.66 | 2997.57 | 6.34  | 72.56 | 72.39 | 72.39 | 4.59 | 1.75 | 89.36 | - | 1.18 | 100.00 | 100.00 | - | 93168.05 |
|         | 2008 | 82.74 | 71.31 | 11.42 | 43900.95 | 3081.87 | 6.57  | 72.56 | 19.25 | 73.47 | 4.83 | 1.74 | 88.87 | - | 1.25 | 100.00 | 100.00 | - | 93201.55 |
|         | 2009 | 82.69 | 71.28 | 11.41 | 41979.87 | 2897.93 | 6.76  | 72.56 | 18.49 | 74.52 | 5.04 | 1.72 | 88.35 | - | 1.19 | 100.00 | 100.00 | - | 93221.81 |
|         | 2010 | 82.69 | 71.27 | 11.43 | 39736.35 | 3173.99 | 8.00  | 72.56 | 15.94 | 78.03 | 6.24 | 1.76 | 87.82 | - | 1.27 | 100.00 | 100.00 | - | 93244.73 |
|         | 2011 | 82.64 | 71.24 | 11.39 | 38205.77 | 2794.50 | 6.70  | 72.56 | 19.24 | 73.49 | 4.93 | 1.78 | 87.26 | - | -    | 100.00 | 100.00 | - | 93265.38 |
|         | 2012 | 82.59 | 71.22 | 11.37 | 38190.59 | 2993.73 | 7.55  | 72.56 | 17.31 | 76.15 | 5.75 | 1.80 | 86.71 | - | -    | 100.00 | 100.00 | - | 93301.35 |
|         | 2013 | 82.58 | 71.22 | 11.36 | 39104.30 | 4914.39 | 11.48 | 72.56 | 11.29 | 84.44 | 9.69 | 1.79 | 86.17 | - | -    | 100.00 | 100.00 | - | 93344.08 |

|         |      |       |       |       |          |         |      |       |       |       |      |      |       |       |      |        |        |          |          |
|---------|------|-------|-------|-------|----------|---------|------|-------|-------|-------|------|------|-------|-------|------|--------|--------|----------|----------|
|         | 2014 | 82.55 | 71.21 | 11.34 | 40785.05 | 3746.33 | 8.13 | 72.56 | 15.94 | 78.03 | 6.34 | 1.79 | 85.63 | -     | -    | 100.00 | 100.00 | -        | 93391.66 |
|         | 2015 | 82.52 | 71.19 | 11.33 | 41765.92 | -       | -    | -     | -     | -     | -    | -    | 85.12 | -     | -    | 100.00 | 100.00 | -        | 93445.46 |
|         | 2016 | 82.52 | 71.20 | 11.33 | 42681.60 | -       | -    | -     | -     | -     | -    | -    | 84.61 | -     | -    | -      | -      | -        | 93491.76 |
|         | 2017 | 82.70 | 71.20 | 11.51 | -        | -       | -    | -     | -     | -     | -    | -    | -     | -     | -    | -      | -      | -        | -        |
| Angola  | 1995 | 51.95 | 45.24 | 6.71  | 1775.90  | 18.01   | 6.46 | 72.69 | 20.26 | 72.14 | 4.66 | 1.80 | 28.88 | 5.01  | 6.92 | 25.50  | 46.10  | 48230.30 | 89975.49 |
|         | 1996 | 52.29 | 45.56 | 6.74  | 1919.21  | 13.76   | 2.81 | 55.17 | 21.07 | 61.81 | 1.74 | 1.07 | 29.57 | 5.01  | 6.85 | 26.80  | 45.90  | 47136.22 | 89942.36 |
|         | 1997 | 52.67 | 45.88 | 6.79  | 2015.01  | 19.28   | 3.48 | 66.72 | 28.04 | 57.98 | 2.02 | 1.46 | 30.27 | 4.99  | 6.79 | 28.10  | 45.80  | 33091.22 | 89915.66 |
|         | 1998 | 52.80 | 46.00 | 6.80  | 2094.48  | 15.14   | 3.34 | 74.33 | 42.81 | 42.41 | 1.41 | 1.92 | 30.98 | 4.96  | 6.73 | 29.40  | 45.70  | 35275.13 | 89885.72 |
|         | 1999 | 52.89 | 46.07 | 6.81  | 2101.95  | 14.23   | 3.38 | 61.15 | 22.56 | 63.11 | 2.13 | 1.25 | 31.69 | 4.91  | 6.68 | 30.80  | 45.70  | 36119.43 | 89875.41 |
|         | 2000 | 53.32 | 46.45 | 6.87  | 2100.57  | 16.90   | 2.79 | 56.55 | 22.52 | 60.17 | 1.68 | 1.11 | 32.42 | 4.85  | 6.64 | 32.10  | 45.70  | 34780.68 | 89869.02 |
|         | 2001 | 53.60 | 46.71 | 6.89  | 2119.33  | 30.92   | 5.38 | 80.50 | 38.45 | 52.23 | 2.81 | 2.57 | 33.15 | 4.84  | 6.60 | 33.50  | 45.70  | 34371.84 | 89835.24 |
|         | 2002 | 54.43 | 47.43 | 7.00  | 1906.09  | 28.19   | 3.63 | 74.68 | 40.05 | 46.37 | 1.69 | 1.95 | 33.90 | 4.83  | 6.57 | 34.80  | 45.70  | 34490.37 | 89801.96 |
|         | 2003 | 55.03 | 47.97 | 7.06  | 1936.60  | 37.45   | 4.41 | 78.87 | 42.27 | 46.41 | 2.04 | 2.36 | 34.65 | 4.80  | 6.54 | 36.20  | 45.80  | 35858.02 | 89771.93 |
|         | 2004 | 55.66 | 48.52 | 7.14  | 2071.91  | 53.46   | 4.71 | 78.34 | 38.27 | 51.15 | 2.41 | 2.30 | 35.41 | 4.77  | 6.50 | 37.60  | 45.90  | 36860.23 | 89758.30 |
|         | 2005 | 56.40 | 49.19 | 7.21  | 2364.19  | 64.69   | 4.10 | 76.19 | 38.60 | 49.33 | 2.02 | 2.08 | 36.17 | 4.72  | 6.47 | 39.00  | 46.00  | 35855.74 | 89733.88 |
|         | 2006 | 56.89 | 49.63 | 7.27  | 2754.41  | 102.38  | 4.54 | 67.91 | 22.72 | 66.54 | 3.02 | 1.52 | 36.94 | 4.72  | 6.42 | 40.40  | 46.20  | 36375.82 | 89664.32 |
|         | 2007 | 57.79 | 50.36 | 7.43  | 3258.48  | 106.60  | 3.38 | 77.95 | 65.44 | 65.44 | 2.21 | 1.17 | 37.72 | 4.71  | 6.37 | 41.80  | 46.40  | 36690.53 | 89590.79 |
|         | 2008 | 58.53 | 50.99 | 7.54  | 3578.87  | 163.12  | 3.84 | 67.06 | 19.68 | 70.65 | 2.72 | 1.13 | 38.51 | 4.69  | 6.31 | 43.30  | 46.60  | 37396.29 | 89527.00 |
|         | 2009 | 59.24 | 51.59 | 7.65  | 3536.80  | 160.84  | 4.37 | 75.38 | 29.45 | 60.93 | 2.66 | 1.71 | 39.30 | 4.66  | 6.24 | 44.70  | 46.90  | 38309.47 | 89470.52 |
|         | 2010 | 60.04 | 52.30 | 7.74  | 3529.05  | 131.80  | 3.39 | 70.77 | 27.75 | 60.78 | 2.06 | 1.33 | 40.10 | 4.61  | 6.16 | 46.20  | 47.10  | 40029.39 | 89420.91 |
|         | 2011 | 60.87 | 52.97 | 7.89  | 3538.72  | 160.36  | 3.38 | 68.98 | 24.99 | 63.77 | 2.16 | 1.22 | 40.90 | 4.59  | 6.08 | 47.60  | 47.50  | 40878.65 | 89348.10 |
|         | 2012 | 61.68 | 53.69 | 7.99  | 3591.03  | 168.03  | 3.30 | 67.87 | 23.98 | 64.67 | 2.14 | 1.17 | 41.70 | 4.55  | 6.00 | 49.10  | 47.80  | 41657.16 | 89283.39 |
|         | 2013 | 62.47 | 54.37 | 8.10  | 3702.60  | 225.74  | 4.26 | 67.00 | 18.59 | 72.26 | 3.08 | 1.18 | 42.49 | 4.52  | 5.92 | 50.60  | 48.20  | -        | 89219.73 |
|         | 2014 | 63.27 | 55.06 | 8.21  | 3747.57  | 179.36  | 3.31 | 67.04 | 23.96 | 64.26 | 2.12 | 1.18 | 43.27 | 4.52  | 5.84 | 51.10  | 48.60  | -        | 89176.01 |
|         | 2015 | 63.98 | 55.67 | 8.31  | 3730.17  | -       | -    | -     | -     | -     | -    | -    | 44.05 | 4.56  | 5.77 | 51.60  | 49.00  | -        | 89149.01 |
|         | 2016 | 64.64 | 56.29 | 8.34  | 3582.65  | -       | -    | -     | -     | -     | -    | -    | 44.82 | 4.63  | -    | -      | -      | -        | 89109.65 |
|         | 2017 | 64.19 | 55.01 | 9.18  | -        | -       | -    | -     | -     | -     | -    | -    | -     | -     | -    | -      | -      | -        | -        |
| Antigua | 1995 | 74.44 | 65.19 | 9.25  | 10440.71 | 353.19  | 4.14 | 86.45 | 29.15 | 66.28 | 2.75 | 1.40 | 33.96 | 12.58 | 2.21 | 79.60  | 97.60  | 391.94   | 91344.82 |
|         | 1996 | 74.44 | 65.20 | 9.24  | 10834.63 | 356.41  | 3.92 | 86.07 | 31.07 | 63.91 | 2.51 | 1.42 | 33.59 | 12.13 | 2.25 | 80.60  | 97.60  | 390.01   | 91383.53 |

|      |       |       |      |          |        |      |       |       |       |      |      |       |       |      |       |       |        |          |
|------|-------|-------|------|----------|--------|------|-------|-------|-------|------|------|-------|-------|------|-------|-------|--------|----------|
| 1997 | 74.82 | 65.50 | 9.33 | 11117.09 | 373.27 | 3.94 | 86.70 | 29.53 | 65.94 | 2.60 | 1.34 | 33.22 | 11.64 | 2.28 | 81.60 | 97.60 | 362.38 | 91418.31 |
| 1998 | 75.03 | 65.66 | 9.37 | 11335.13 | 386.63 | 3.92 | 87.98 | 28.01 | 68.16 | 2.67 | 1.25 | 32.86 | 11.16 | 2.30 | 82.60 | 97.60 | 379.42 | 91437.16 |
| 1999 | 74.97 | 65.62 | 9.35 | 11470.99 | 400.74 | 3.96 | 87.04 | 26.74 | 69.28 | 2.74 | 1.22 | 32.49 | 10.71 | 2.32 | 83.60 | 97.70 | 404.10 | 91454.96 |
| 2000 | 74.83 | 65.51 | 9.32 | 11981.92 | 416.41 | 4.13 | 81.27 | 26.35 | 67.58 | 2.79 | 1.34 | 32.13 | 10.30 | 2.32 | 84.60 | 97.70 | 398.69 | 91475.06 |
| 2001 | 75.17 | 65.76 | 9.40 | 11191.10 | 439.38 | 4.48 | 81.10 | 27.75 | 65.78 | 2.95 | 1.53 | 31.74 | 10.17 | 2.31 | 85.50 | 97.70 | 399.27 | 91488.11 |
| 2002 | 75.40 | 65.94 | 9.46 | 11147.26 | 442.61 | 4.41 | 81.10 | 26.89 | 66.84 | 2.95 | 1.46 | 31.10 | 10.08 | 2.29 | 86.50 | 97.70 | 406.43 | 91506.26 |
| 2003 | 75.60 | 66.09 | 9.50 | 11683.46 | 470.78 | 4.53 | 81.10 | 28.34 | 65.06 | 2.95 | 1.58 | 30.47 | 10.08 | 2.27 | 87.50 | 97.80 | 418.84 | 91519.08 |
| 2004 | 75.69 | 66.16 | 9.53 | 12218.74 | 462.49 | 4.21 | 81.10 | 29.44 | 63.70 | 2.68 | 1.53 | 29.84 | 10.18 | 2.25 | 88.50 | 97.80 | 449.00 | 91537.94 |
| 2005 | 75.96 | 66.38 | 9.58 | 12857.16 | 532.73 | 4.41 | 78.48 | 25.98 | 66.89 | 2.95 | 1.46 | 29.22 | 10.37 | 2.22 | 89.50 | 97.80 | 454.07 | 91558.80 |
| 2006 | 76.07 | 66.48 | 9.59 | 14325.48 | 590.24 | 4.34 | 76.64 | 24.55 | 67.97 | 2.95 | 1.39 | 28.61 | 10.33 | 2.20 | 90.40 | 97.80 | 463.57 | 91600.53 |
| 2007 | 76.46 | 66.77 | 9.69 | 15466.95 | 652.25 | 4.27 | 74.71 | 69.09 | 69.09 | 2.95 | 1.32 | 28.00 | 10.30 | 2.18 | 91.40 | 97.90 | 478.08 | 91655.55 |
| 2008 | 76.66 | 66.93 | 9.73 | 15278.87 | 740.69 | 4.69 | 77.10 | 22.17 | 71.25 | 3.34 | 1.35 | 27.41 | 10.24 | 2.16 | 91.40 | 97.90 | 491.90 | 91717.42 |
| 2009 | 76.91 | 67.13 | 9.78 | 13270.70 | 679.68 | 4.86 | 77.07 | 24.06 | 68.78 | 3.34 | 1.52 | 26.82 | 10.14 | 2.15 | 91.40 | 97.90 | -      | 91788.48 |
| 2010 | 76.91 | 67.17 | 9.74 | 12174.70 | 732.68 | 5.63 | 74.93 | 23.10 | 69.18 | 3.89 | 1.73 | 26.24 | 9.99  | 2.13 | 91.40 | 97.90 | -      | 91862.44 |
| 2011 | 76.99 | 67.21 | 9.78 | 11789.80 | 724.02 | 5.65 | 73.97 | 23.01 | 68.89 | 3.89 | 1.76 | 25.67 | 9.88  | 2.12 | 91.40 | 97.90 | 537.81 | 91913.54 |
| 2012 | 77.10 | 67.30 | 9.80 | 12069.81 | 728.48 | 5.39 | 74.99 | 24.14 | 67.81 | 3.65 | 1.73 | 25.14 | 9.74  | 2.10 | -     | 97.90 | 552.75 | 91972.53 |
| 2013 | 77.34 | 67.48 | 9.86 | 11928.22 | 711.43 | 5.33 | 74.73 | 24.38 | 67.38 | 3.59 | 1.74 | 24.64 | 9.59  | 2.09 | -     | 97.90 | -      | 92031.39 |
| 2014 | 77.17 | 67.36 | 9.81 | 12403.53 | 773.71 | 5.54 | 74.73 | 23.69 | 68.29 | 3.78 | 1.76 | 24.19 | 9.52  | 2.08 | -     | 97.90 | -      | 92086.16 |
| 2015 | 77.29 | 67.44 | 9.84 | 12771.77 | -      | -    | -     | -     | -     | -    | -    | 23.77 | 9.56  | 2.06 | -     | 97.90 | -      | 92138.66 |
| 2016 | 77.36 | 67.53 | 9.83 | 13315.51 | -      | -    | -     | -     | -     | -    | -    | 23.39 | 9.74  | -    | -     | -     | -      | 92196.02 |
| 2017 | 77.02 | 67.26 | 9.76 | -        | -      | -    | -     | -     | -     | -    | -    | -     | -     | -    | -     | -     | -      | -        |

|       |      |       |       |      |         |       |      |       |       |       |      |      |       |      |      |       |       |           |          |
|-------|------|-------|-------|------|---------|-------|------|-------|-------|-------|------|------|-------|------|------|-------|-------|-----------|----------|
| Egypt | 1995 | 67.68 | 58.02 | 9.65 | 1661.33 | 37.25 | 3.54 | 89.64 | 47.92 | 46.54 | 1.65 | 1.89 | 42.81 | 8.52 | 3.71 | 78.80 | 94.60 | 155524.88 | 89825.22 |
|       | 1996 | 68.07 | 58.41 | 9.67 | 1711.47 | 45.32 | 3.90 | 92.85 | 54.23 | 41.59 | 1.62 | 2.28 | 42.68 | 8.54 | 3.57 | 79.80 | 94.90 | 159241.03 | 89805.15 |
|       | 1997 | 68.43 | 58.73 | 9.70 | 1772.21 | 58.07 | 4.61 | 95.20 | 58.33 | 38.73 | 1.79 | 2.82 | 42.66 | 8.53 | 3.46 | 81.00 | 95.10 | 165320.70 | 89789.54 |
|       | 1998 | 69.00 | 59.20 | 9.80 | 1810.17 | 65.13 | 4.93 | 96.17 | 57.72 | 39.98 | 1.97 | 2.96 | 42.70 | 8.51 | 3.37 | 82.10 | 95.40 | 170721.57 | 89781.16 |
|       | 1999 | 69.35 | 59.49 | 9.86 | 1885.74 | 72.00 | 5.26 | 96.96 | 57.80 | 40.39 | 2.12 | 3.13 | 42.75 | 8.46 | 3.29 | 83.20 | 95.60 | 177970.05 | 89773.32 |
|       | 2000 | 69.85 | 59.91 | 9.94 | 1950.61 | 77.72 | 5.55 | 97.57 | 58.07 | 40.48 | 2.25 | 3.30 | 42.80 | 8.38 | 3.23 | 84.30 | 95.90 | 184459.74 | 89770.50 |
|       | 2001 | 69.70 | 59.81 | 9.89 | 1982.11 | 74.96 | 5.75 | 98.03 | 58.35 | 40.48 | 2.33 | 3.42 | 42.84 | 8.32 | 3.18 | 85.50 | 96.10 | 187292.45 | 89820.91 |
|       | 2002 | 69.79 | 59.89 | 9.90 | 1990.99 | 72.84 | 5.97 | 98.40 | 58.78 | 40.27 | 2.40 | 3.57 | 42.89 | 8.23 | 3.13 | 86.60 | 96.40 | 202779.01 | 89870.47 |

|      |       |       |       |         |        |      |       |       |       |      |      |       |      |      |       |       |           |          |
|------|-------|-------|-------|---------|--------|------|-------|-------|-------|------|------|-------|------|------|-------|-------|-----------|----------|
| 2003 | 69.88 | 59.96 | 9.92  | 2015.90 | 55.49  | 5.41 | 98.41 | 60.79 | 38.22 | 2.07 | 3.34 | 42.94 | 8.13 | 3.09 | 87.70 | 96.60 | 211890.80 | 89918.11 |
| 2004 | 70.06 | 60.10 | 9.96  | 2059.38 | 56.07  | 5.21 | 98.37 | 60.88 | 38.11 | 1.99 | 3.22 | 42.98 | 8.02 | 3.05 | 88.80 | 96.90 | 223361.42 | 89963.42 |
| 2005 | 70.23 | 60.24 | 9.98  | 2112.49 | 63.81  | 5.06 | 98.24 | 59.72 | 39.21 | 1.99 | 3.08 | 43.03 | 7.89 | 3.02 | 90.00 | 97.10 | 243789.53 | 90012.27 |
| 2006 | 70.22 | 60.29 | 9.94  | 2217.39 | 74.01  | 5.24 | 98.02 | 55.23 | 43.66 | 2.29 | 2.95 | 43.07 | 7.80 | 3.00 | 91.10 | 97.30 | 256320.60 | 90040.98 |
| 2007 | 70.49 | 60.49 | 10.00 | 2333.47 | 84.31  | 4.95 | 97.79 | 41.34 | 41.34 | 2.05 | 2.90 | 43.08 | 7.70 | 3.02 | 92.20 | 97.60 | 266252.27 | 90059.86 |
| 2008 | 70.49 | 60.51 | 9.97  | 2456.73 | 100.60 | 4.82 | 97.37 | 56.37 | 42.11 | 2.03 | 2.79 | 43.06 | 7.60 | 3.06 | 93.30 | 97.80 | 269736.63 | 90068.93 |
| 2009 | 70.38 | 60.45 | 9.93  | 2524.43 | 117.05 | 5.01 | 96.87 | 57.07 | 41.09 | 2.06 | 2.95 | 43.04 | 7.55 | 3.11 | 94.40 | 98.10 | 266325.43 | 90079.06 |
| 2010 | 70.46 | 60.55 | 9.91  | 2602.48 | 125.50 | 4.80 | 95.76 | 58.38 | 39.03 | 1.87 | 2.92 | 43.02 | 7.56 | 3.19 | 94.70 | 98.30 | 280255.58 | 90088.04 |
| 2011 | 70.80 | 60.85 | 9.95  | 2593.60 | 139.00 | 5.04 | 93.67 | 56.67 | 39.50 | 1.99 | 3.05 | 43.00 | 7.66 | 3.25 | 94.70 | 98.60 | 288287.83 | 90052.75 |
| 2012 | 70.94 | 61.00 | 9.94  | 2593.23 | 160.76 | 5.29 | 90.07 | 57.59 | 36.07 | 1.91 | 3.38 | 43.00 | 7.80 | 3.31 | 94.70 | 98.80 | 295499.75 | 90026.95 |
| 2013 | 71.45 | 61.41 | 10.04 | 2591.06 | 159.11 | 5.46 | 90.07 | 56.15 | 37.67 | 2.06 | 3.41 | 43.03 | 7.95 | 3.34 | 94.70 | 99.10 | -         | 90007.20 |
| 2014 | 71.68 | 61.62 | 10.07 | 2608.38 | 177.77 | 5.64 | 90.07 | 55.66 | 38.20 | 2.16 | 3.49 | 43.07 | 8.09 | 3.34 | 94.70 | 99.20 | -         | 90032.18 |
| 2015 | 71.84 | 61.76 | 10.08 | 2665.35 | -      | -    | -     | -     | -     | -    | -    | 43.14 | 8.19 | 3.31 | 94.70 | 99.40 | -         | 90086.40 |
| 2016 | 72.13 | 62.04 | 10.09 | 2724.40 | -      | -    | -     | -     | -     | -    | -    | 43.22 | 8.32 | -    | -     | -     | -         | 90133.10 |
| 2017 | 70.64 | 60.81 | 9.84  | -       | -      | -    | -     | -     | -     | -    | -    | -     | -    | -    | -     | -     | -         | -        |

|           |      |       |       |      |          |        |      |       |       |       |      |      |       |       |      |       |       |           |          |
|-----------|------|-------|-------|------|----------|--------|------|-------|-------|-------|------|------|-------|-------|------|-------|-------|-----------|----------|
| Argentina | 1995 | 73.07 | 64.15 | 8.92 | 7630.02  | 612.96 | 8.31 | 69.52 | 27.98 | 59.76 | 4.97 | 3.34 | 88.16 | 15.57 | 2.76 | 89.50 | 95.10 | 275096.41 | 88435.42 |
|           | 1996 | 73.25 | 64.31 | 8.94 | 7955.13  | 616.81 | 8.02 | 70.38 | 29.76 | 57.72 | 4.63 | 3.39 | 88.37 | 15.69 | 2.71 | 89.90 | 95.40 | 288246.27 | 88446.63 |
|           | 1997 | 73.47 | 64.50 | 8.97 | 8500.94  | 683.69 | 8.36 | 63.21 | 28.79 | 54.45 | 4.55 | 3.81 | 88.56 | 15.79 | 2.66 | 90.20 | 95.60 | 299708.76 | 88405.59 |
|           | 1998 | 73.68 | 64.69 | 8.99 | 8728.95  | 704.46 | 8.54 | 63.42 | 29.06 | 54.17 | 4.62 | 3.91 | 88.76 | 15.87 | 2.62 | 90.60 | 95.80 | 311514.70 | 88342.14 |
|           | 1999 | 73.91 | 64.88 | 9.03 | 8339.89  | 724.11 | 9.36 | 63.65 | 28.60 | 55.07 | 5.15 | 4.20 | 88.95 | 15.93 | 2.59 | 91.00 | 96.10 | 333886.59 | 88272.95 |
|           | 2000 | 74.19 | 65.12 | 9.07 | 8182.69  | 706.90 | 9.21 | 62.98 | 29.03 | 53.90 | 4.97 | 4.25 | 89.14 | 15.96 | 2.56 | 91.40 | 96.30 | 331450.87 | 88195.62 |
|           | 2001 | 74.37 | 65.27 | 9.10 | 7735.49  | 672.65 | 9.38 | 64.01 | 29.43 | 54.03 | 5.07 | 4.31 | 89.33 | 16.01 | 2.54 | 91.70 | 96.50 | 326483.81 | 88191.14 |
|           | 2002 | 74.47 | 65.37 | 9.10 | 6816.73  | 223.91 | 8.31 | 64.22 | 29.82 | 53.56 | 4.45 | 3.86 | 89.52 | 16.04 | 2.52 | 92.10 | 96.70 | 311051.93 | 88218.84 |
|           | 2003 | 74.62 | 65.51 | 9.12 | 7337.79  | 277.94 | 8.22 | 64.41 | 31.08 | 51.74 | 4.25 | 3.97 | 89.71 | 16.05 | 2.50 | 92.50 | 96.90 | 344797.06 | 88274.96 |
|           | 2004 | 74.92 | 65.75 | 9.17 | 7913.74  | 323.75 | 6.84 | 64.06 | 31.07 | 51.49 | 3.52 | 3.32 | 89.90 | 16.05 | 2.47 | 92.80 | 97.10 | 369944.11 | 88346.67 |
|           | 2005 | 75.17 | 65.98 | 9.19 | 8522.52  | 389.82 | 6.85 | 64.30 | 29.88 | 53.53 | 3.66 | 3.18 | 90.08 | 16.06 | 2.45 | 93.20 | 97.30 | 358385.64 | 88437.86 |
|           | 2006 | 75.31 | 66.10 | 9.21 | 9112.11  | 447.17 | 6.68 | 64.14 | 29.06 | 54.70 | 3.65 | 3.03 | 90.27 | 16.10 | 2.43 | 93.50 | 97.50 | 373600.56 | 88455.79 |
|           | 2007 | 75.34 | 66.11 | 9.23 | 9830.68  | 539.24 | 6.49 | 61.51 | 58.25 | 58.25 | 3.78 | 2.71 | 90.45 | 16.14 | 2.41 | 93.90 | 97.70 | 384547.75 | 88465.16 |
|           | 2008 | 75.55 | 66.28 | 9.27 | 10125.13 | 673.84 | 6.66 | 59.24 | 22.61 | 61.84 | 4.12 | 2.54 | 90.62 | 16.19 | 2.40 | 94.20 | 97.90 | 411503.63 | 88479.16 |

|      |       |       |      |          |        |      |       |       |       |      |      |       |       |      |       |       |           |          |
|------|-------|-------|------|----------|--------|------|-------|-------|-------|------|------|-------|-------|------|-------|-------|-----------|----------|
| 2009 | 75.70 | 66.39 | 9.31 | 9428.50  | 711.95 | 7.63 | 59.24 | 20.13 | 66.02 | 5.04 | 2.59 | 90.80 | 16.25 | 2.38 | 94.50 | 98.10 | 373409.07 | 88501.98 |
| 2010 | 75.87 | 66.55 | 9.32 | 10276.26 | 738.48 | 6.55 | 60.38 | 22.00 | 63.56 | 4.16 | 2.39 | 90.97 | 16.33 | 2.37 | 94.90 | 98.20 | 364684.25 | 88518.85 |
| 2011 | 76.04 | 66.66 | 9.38 | 10780.02 | 795.75 | 5.89 | 63.19 | 23.03 | 63.56 | 3.75 | 2.15 | 91.13 | 16.46 | 2.36 | 95.20 | 98.40 | 372873.14 | 88517.87 |
| 2012 | 76.16 | 66.75 | 9.41 | 10557.89 | 726.79 | 5.02 | 65.46 | 26.87 | 58.95 | 2.96 | 2.06 | 91.30 | 16.61 | 2.35 | 95.50 | 98.60 | 380295.32 | 88549.54 |
| 2013 | 76.27 | 66.84 | 9.44 | 10699.20 | 731.45 | 4.99 | 66.85 | 30.19 | 54.84 | 2.74 | 2.25 | 91.45 | 16.77 | 2.34 | 95.80 | 98.80 | -         | 88561.00 |
| 2014 | 76.48 | 67.01 | 9.48 | 10323.21 | 605.19 | 4.79 | 68.94 | 30.73 | 55.43 | 2.65 | 2.13 | 91.60 | 16.93 | 2.32 | 96.10 | 98.90 | -         | 88607.08 |
| 2015 | 76.60 | 67.10 | 9.50 | 10490.02 | -      | -    | -     | -     | -     | -    | -    | 91.75 | 17.11 | 2.31 | 96.40 | 99.10 | -         | 88657.84 |
| 2016 | 76.71 | 67.22 | 9.48 | 10154.00 | -      | -    | -     | -     | -     | -    | -    | 91.89 | 17.31 | -    | -     | -     | -         | 88692.31 |
| 2017 | 76.66 | 66.82 | 9.84 | -        | -      | -    | -     | -     | -     | -    | -    | -     | -     | -    | -     | -     | -         | -        |

|         |      |       |       |      |         |        |      |       |       |       |      |      |       |       |      |       |        |          |          |
|---------|------|-------|-------|------|---------|--------|------|-------|-------|-------|------|------|-------|-------|------|-------|--------|----------|----------|
| Armenia | 1995 | 69.30 | 60.96 | 8.34 | 1043.54 | 25.62  | 6.42 | 96.13 | 66.23 | 31.10 | 2.00 | 4.42 | 66.06 | 13.44 | 2.06 | 89.40 | 90.50  | 6710.37  | 90717.61 |
|         | 1996 | 69.62 | 61.29 | 8.33 | 1121.88 | 29.14  | 5.79 | 96.34 | 69.37 | 28.00 | 1.62 | 4.17 | 65.78 | 14.05 | 1.94 | 89.40 | 90.50  | 5992.24  | 90936.22 |
|         | 1997 | 70.34 | 61.89 | 8.45 | 1172.14 | 30.12  | 5.77 | 94.97 | 71.79 | 24.40 | 1.41 | 4.36 | 65.50 | 14.47 | 1.83 | 89.40 | 91.00  | 6719.59  | 91144.76 |
|         | 1998 | 70.84 | 62.32 | 8.52 | 1267.58 | 34.99  | 5.76 | 94.89 | 67.77 | 28.58 | 1.64 | 4.11 | 65.23 | 14.78 | 1.75 | 89.40 | 91.50  | 6737.04  | 91339.05 |
|         | 1999 | 71.28 | 62.69 | 8.59 | 1317.74 | 33.89  | 5.68 | 93.94 | 67.28 | 28.38 | 1.61 | 4.07 | 64.95 | 15.13 | 1.69 | 89.40 | 92.10  | 6389.01  | 91522.86 |
|         | 2000 | 71.96 | 63.23 | 8.73 | 1404.32 | 38.83  | 6.25 | 94.55 | 77.35 | 18.19 | 1.14 | 5.12 | 64.67 | 15.61 | 1.65 | 89.30 | 92.60  | 6867.71  | 91679.39 |
|         | 2001 | 72.18 | 63.42 | 8.76 | 1548.08 | 41.13  | 5.94 | 95.31 | 69.78 | 26.79 | 1.59 | 4.35 | 64.39 | 16.11 | 1.64 | 89.30 | 93.10  | 6896.45  | 91699.12 |
|         | 2002 | 72.56 | 63.72 | 8.84 | 1761.89 | 41.99  | 5.40 | 91.92 | 68.75 | 25.21 | 1.36 | 4.04 | 64.28 | 16.74 | 1.64 | 89.30 | 93.70  | 6460.24  | 91715.54 |
|         | 2003 | 72.63 | 63.79 | 8.84 | 2019.98 | 51.51  | 5.56 | 95.04 | 69.13 | 27.26 | 1.52 | 4.05 | 64.25 | 17.37 | 1.65 | 89.40 | 94.30  | 6973.88  | 91718.93 |
|         | 2004 | 72.71 | 63.86 | 8.85 | 2244.22 | 65.49  | 5.50 | 95.81 | 71.35 | 25.53 | 1.40 | 4.10 | 64.22 | 17.79 | 1.67 | 89.40 | 94.90  | 7633.47  | 91690.56 |
|         | 2005 | 72.52 | 63.75 | 8.78 | 2571.99 | 86.10  | 5.25 | 96.73 | 61.65 | 36.27 | 1.91 | 3.35 | 64.18 | 17.86 | 1.68 | 89.40 | 95.50  | 8401.82  | 91667.11 |
|         | 2006 | 72.43 | 63.71 | 8.72 | 2933.83 | 98.22  | 4.58 | 95.47 | 52.65 | 44.84 | 2.05 | 2.52 | 64.15 | 17.72 | 1.69 | 89.50 | 96.10  | 8743.51  | 91527.00 |
|         | 2007 | 72.84 | 64.03 | 8.81 | 3366.16 | 134.06 | 4.31 | 96.44 | 48.72 | 48.72 | 2.10 | 2.21 | 64.12 | 17.29 | 1.70 | 89.50 | 96.70  | 9323.72  | 91415.82 |
|         | 2008 | 72.73 | 63.97 | 8.77 | 3629.16 | 149.38 | 3.80 | 95.98 | 51.40 | 46.45 | 1.76 | 2.03 | 64.00 | 16.70 | 1.71 | 89.50 | 97.30  | 12469.98 | 91295.67 |
|         | 2009 | 72.92 | 64.11 | 8.81 | 3136.81 | 132.52 | 4.55 | 95.16 | 53.08 | 44.22 | 2.01 | 2.54 | 63.79 | 16.16 | 1.70 | 89.50 | 97.90  | 11235.09 | 91211.93 |
|         | 2010 | 73.27 | 64.41 | 8.86 | 3218.38 | 143.06 | 4.56 | 96.57 | 55.87 | 42.14 | 1.92 | 2.64 | 63.58 | 15.81 | 1.69 | 89.50 | 98.40  | 11393.04 | 91171.84 |
|         | 2011 | 73.75 | 64.76 | 8.99 | 3371.67 | 127.01 | 3.71 | 98.45 | 47.05 | 52.21 | 1.94 | 1.77 | 63.37 | 15.59 | 1.68 | 89.50 | 99.00  | 12417.74 | 91233.49 |
|         | 2012 | 74.29 | 65.19 | 9.11 | 3606.48 | 149.93 | 4.48 | 93.84 | 54.57 | 41.85 | 1.88 | 2.61 | 63.16 | 15.51 | 1.66 | 89.50 | 99.70  | 12319.39 | 91307.02 |
|         | 2013 | 75.06 | 65.79 | 9.28 | 3710.58 | 158.98 | 4.55 | 93.84 | 53.69 | 42.78 | 1.95 | 2.60 | 62.98 | 15.55 | 1.65 | 89.50 | 99.90  | -        | 91412.04 |
|         | 2014 | 75.49 | 66.12 | 9.38 | 3827.34 | 161.55 | 4.48 | 93.85 | 53.51 | 42.98 | 1.93 | 2.55 | 62.81 | 15.64 | 1.63 | 89.50 | 100.00 | -        | 91500.04 |

|           |      |       |       |       |          |         |      |       |       |       |      |      |       |       |       |        |        |            |          |          |
|-----------|------|-------|-------|-------|----------|---------|------|-------|-------|-------|------|------|-------|-------|-------|--------|--------|------------|----------|----------|
|           | 2015 | 75.55 | 66.16 | 9.39  | 3935.29  | -       | -    | -     | -     | -     | -    | -    | -     | 62.67 | 15.75 | 1.62   | 89.50  | 100.00     | -        | 91588.90 |
|           | 2016 | 75.85 | 66.47 | 9.38  | 3932.55  | -       | -    | -     | -     | -     | -    | -    | -     | 62.56 | 16.03 | -      | -      | -          | -        | 91615.77 |
|           | 2017 | 75.61 | 65.83 | 9.78  | -        | -       | -    | -     | -     | -     | -    | -    | -     | -     | -     | -      | -      | -          | -        | -        |
| Australia | 1995 | 78.30 | 68.04 | 10.26 | 38078.90 | 1591.18 | 7.26 | 47.01 | 16.09 | 65.78 | 4.78 | 2.48 | 86.11 | 17.84 | 1.82  | 100.00 | 100.00 | 489294.15  | 88098.28 |          |
|           | 1996 | 78.50 | 68.24 | 10.26 | 39065.92 | 1789.35 | 7.44 | 48.77 | 16.95 | 65.25 | 4.86 | 2.59 | 86.28 | 18.01 | 1.80  | 100.00 | 100.00 | 508882.83  | 88126.93 |          |
|           | 1997 | 78.80 | 68.50 | 10.29 | 40156.34 | 1787.63 | 7.50 | 50.97 | 16.87 | 66.89 | 5.02 | 2.48 | 86.50 | 18.14 | 1.78  | 100.00 | 100.00 | 921012.05  | 88172.51 |          |
|           | 1998 | 79.11 | 68.78 | 10.33 | 41504.50 | 1613.11 | 7.66 | 59.16 | 19.90 | 66.36 | 5.08 | 2.58 | 86.73 | 18.24 | 1.76  | 100.00 | 100.00 | 920773.48  | 88244.75 |          |
|           | 1999 | 79.40 | 69.04 | 10.36 | 43087.45 | 1775.35 | 7.79 | 58.87 | 18.61 | 68.38 | 5.33 | 2.46 | 86.95 | 18.35 | 1.76  | 100.00 | 100.00 | 1190138.38 | 88300.76 |          |
|           | 2000 | 79.71 | 69.30 | 10.41 | 44223.59 | 1745.93 | 8.08 | 59.67 | 19.78 | 66.84 | 5.40 | 2.68 | 87.17 | 18.48 | 1.76  | 100.00 | 100.00 | 1081244.41 | 88493.44 |          |
|           | 2001 | 80.02 | 69.56 | 10.46 | 44473.41 | 1665.20 | 8.18 | 57.10 | 19.25 | 66.28 | 5.42 | 2.76 | 87.38 | 18.58 | 1.74  | 100.00 | 100.00 | 1241515.99 | 88421.61 |          |
|           | 2002 | 80.24 | 69.75 | 10.50 | 45626.62 | 1883.32 | 8.39 | 56.77 | 18.74 | 66.99 | 5.62 | 2.77 | 87.54 | 18.70 | 1.76  | 100.00 | 100.00 | 1117450.02 | 88454.49 |          |
|           | 2003 | 80.54 | 69.99 | 10.55 | 46449.85 | 2370.88 | 8.32 | 53.78 | 18.18 | 66.19 | 5.51 | 2.81 | 87.70 | 18.84 | 1.75  | 100.00 | 100.00 | 1023667.58 | 88494.84 |          |
|           | 2004 | 80.81 | 70.20 | 10.61 | 47817.90 | 2933.23 | 8.57 | 54.70 | 18.18 | 66.77 | 5.72 | 2.85 | 87.85 | 18.99 | 1.77  | 100.00 | 100.00 | 1144343.87 | 88522.25 |          |
|           | 2005 | 81.09 | 70.41 | 10.68 | 48702.73 | 3214.03 | 8.45 | 56.12 | 18.54 | 66.97 | 5.66 | 2.79 | 88.00 | 19.16 | 1.81  | 100.00 | 100.00 | 909262.03  | 88546.89 |          |
|           | 2006 | 81.27 | 70.54 | 10.73 | 49418.69 | 3421.91 | 8.49 | 55.73 | 18.57 | 66.67 | 5.66 | 2.83 | 88.15 | 19.21 | 1.91  | 100.00 | 100.00 | 1119632.10 | 88530.06 |          |
|           | 2007 | 81.43 | 70.65 | 10.78 | 50952.47 | 4077.85 | 8.53 | 55.40 | 67.59 | 67.59 | 5.77 | 2.76 | 88.30 | 19.27 | 1.96  | 100.00 | 100.00 | 1065623.87 | 88504.98 |          |
|           | 2008 | 81.58 | 70.74 | 10.83 | 51788.44 | 4410.44 | 8.78 | 55.14 | 17.93 | 67.49 | 5.93 | 2.86 | 88.45 | 19.38 | 1.98  | 100.00 | 100.00 | 892629.27  | 88478.42 |          |
|           | 2009 | 81.79 | 70.88 | 10.91 | 51651.22 | 4256.64 | 9.05 | 57.30 | 18.11 | 68.39 | 6.19 | 2.86 | 88.59 | 19.59 | 1.97  | 100.00 | 100.00 | 1105167.24 | 88464.56 |          |
|           | 2010 | 81.99 | 71.00 | 10.99 | 51874.08 | 5324.52 | 9.02 | 58.01 | 18.58 | 67.97 | 6.13 | 2.89 | 88.73 | 19.91 | 1.93  | 100.00 | 100.00 | 782102.69  | 88465.66 |          |
|           | 2011 | 82.15 | 71.16 | 11.00 | 52372.15 | 6368.42 | 9.20 | 57.22 | 17.94 | 68.65 | 6.32 | 2.88 | 88.88 | 20.38 | 1.93  | 100.00 | 100.00 | 785795.15  | 88475.31 |          |
|           | 2012 | 82.33 | 71.32 | 11.01 | 53348.39 | 6543.52 | 9.36 | 57.08 | 18.74 | 67.17 | 6.29 | 3.07 | 89.02 | 20.91 | 1.92  | 100.00 | 100.00 | 761686.27  | 88535.48 |          |
|           | 2013 | 82.53 | 71.49 | 11.05 | 53798.36 | 6258.47 | 9.36 | 57.08 | 18.83 | 67.01 | 6.27 | 3.09 | 89.15 | 21.49 | 1.86  | 100.00 | 100.00 | -          | 88614.90 |          |
|           | 2014 | 82.58 | 71.54 | 11.04 | 54394.33 | 6031.11 | 9.42 | 57.08 | 18.82 | 67.04 | 6.32 | 3.11 | 89.29 | 22.07 | 1.83  | 100.00 | 100.00 | -          | 88733.50 |          |
|           | 2015 | 82.55 | 71.54 | 11.01 | 54941.91 | -       | -    | -     | -     | -     | -    | -    | 89.42 | 22.63 | 1.83  | 100.00 | 100.00 | -          | 88862.31 |          |
|           | 2016 | 82.52 | 71.53 | 10.99 | 55670.92 | -       | -    | -     | -     | -     | -    | -    | 89.55 | 23.16 | -     | -      | -      | -          | 89013.40 |          |
|           | 2017 | 82.39 | 70.37 | 12.02 | -        | -       | -    | -     | -     | -     | -    | -    | -     | -     | -     | -      | -      | -          | -        |          |
| Austria   | 1995 | 76.84 | 67.11 | 9.73  | 36584.78 | 2867.56 | 9.55 | 60.04 | 15.15 | 74.76 | 7.14 | 2.41 | 65.80 | 22.64 | 1.42  | 100.00 | 100.00 | 82480.63   | 91909.64 |          |
|           | 1996 | 77.10 | 67.36 | 9.75  | 37411.65 | 2811.46 | 9.53 | 60.87 | 15.53 | 74.48 | 7.10 | 2.43 | 65.80 | 22.73 | 1.45  | 100.00 | 100.00 | 85648.27   | 91941.35 |          |
|           | 1997 | 77.40 | 67.61 | 9.78  | 38193.28 | 2563.92 | 9.83 | 61.21 | 15.38 | 74.88 | 7.36 | 2.47 | 65.80 | 22.74 | 1.39  | 100.00 | 100.00 | 84731.33   | 91995.13 |          |

|      |       |       |       |          |         |       |       |       |       |      |      |       |       |      |        |        |          |          |
|------|-------|-------|-------|----------|---------|-------|-------|-------|-------|------|------|-------|-------|------|--------|--------|----------|----------|
| 1998 | 77.68 | 67.86 | 9.82  | 39509.57 | 2675.56 | 10.00 | 60.89 | 15.34 | 74.81 | 7.48 | 2.52 | 65.80 | 22.70 | 1.37 | 100.00 | 100.00 | 85728.61 | 92073.46 |
| 1999 | 77.94 | 68.08 | 9.86  | 40848.41 | 2709.57 | 10.19 | 59.98 | 14.95 | 75.07 | 7.65 | 2.54 | 65.80 | 22.67 | 1.34 | 100.00 | 100.00 | 83880.53 | 92153.64 |
| 2000 | 78.26 | 68.33 | 9.93  | 42122.94 | 2415.78 | 10.06 | 59.97 | 15.07 | 74.88 | 7.54 | 2.53 | 65.80 | 22.70 | 1.36 | 100.00 | 100.00 | 82686.75 | 92246.11 |
| 2001 | 78.61 | 68.62 | 10.00 | 42528.70 | 2418.44 | 10.12 | 61.40 | 15.87 | 74.15 | 7.50 | 2.62 | 65.80 | 22.87 | 1.33 | 100.00 | 100.00 | 85851.61 | 92317.82 |
| 2002 | 78.84 | 68.81 | 10.03 | 43020.74 | 2643.58 | 10.27 | 61.05 | 15.83 | 74.07 | 7.61 | 2.66 | 65.81 | 23.05 | 1.39 | 100.00 | 100.00 | 87386.69 | 92391.20 |
| 2003 | 79.04 | 68.97 | 10.07 | 43135.40 | 3285.60 | 10.48 | 61.24 | 16.03 | 73.82 | 7.74 | 2.74 | 65.81 | 23.27 | 1.38 | 100.00 | 100.00 | 92659.84 | 92439.80 |
| 2004 | 79.35 | 69.22 | 10.13 | 44028.53 | 3779.75 | 10.56 | 66.67 | 17.48 | 73.78 | 7.79 | 2.77 | 65.82 | 23.54 | 1.42 | 100.00 | 100.00 | 96330.91 | 92493.44 |
| 2005 | 79.59 | 69.40 | 10.19 | 44665.71 | 3916.48 | 10.53 | 67.96 | 17.42 | 74.36 | 7.83 | 2.70 | 65.82 | 23.88 | 1.41 | 100.00 | 100.00 | 97552.85 | 92556.31 |
| 2006 | 79.87 | 69.63 | 10.24 | 45934.54 | 4075.33 | 10.35 | 68.09 | 17.19 | 74.75 | 7.74 | 2.61 | 65.83 | 24.34 | 1.41 | 100.00 | 100.00 | 95636.73 | 92595.23 |
| 2007 | 80.10 | 69.81 | 10.29 | 47444.02 | 4710.11 | 10.40 | 67.71 | 74.76 | 74.76 | 7.78 | 2.63 | 65.84 | 24.86 | 1.38 | 100.00 | 100.00 | 93276.76 | 92648.09 |
| 2008 | 80.29 | 69.95 | 10.34 | 48027.52 | 5286.92 | 10.60 | 66.66 | 16.39 | 75.40 | 8.00 | 2.61 | 65.84 | 25.40 | 1.42 | 100.00 | 100.00 | 94608.82 | 92707.51 |
| 2009 | 80.38 | 70.02 | 10.37 | 46082.05 | 5153.79 | 11.19 | 67.02 | 16.33 | 75.63 | 8.47 | 2.73 | 65.85 | 25.91 | 1.39 | 100.00 | 100.00 | 89046.76 | 92762.94 |
| 2010 | 80.58 | 70.15 | 10.43 | 46858.04 | 5049.56 | 11.17 | 66.95 | 16.58 | 75.23 | 8.40 | 2.77 | 65.85 | 26.37 | 1.44 | 100.00 | 100.00 | 94172.35 | 92824.28 |
| 2011 | 80.80 | 70.33 | 10.46 | 48011.71 | 5431.67 | 10.94 | 67.02 | 16.68 | 75.11 | 8.21 | 2.72 | 65.86 | 26.77 | 1.43 | 100.00 | 100.00 | 92315.05 | 92851.85 |
| 2012 | 80.94 | 70.45 | 10.48 | 48149.72 | 5239.52 | 11.17 | 66.35 | 16.34 | 75.37 | 8.42 | 2.75 | 65.86 | 27.13 | 1.44 | 100.00 | 100.00 | 90460.21 | 92876.73 |
| 2013 | 81.13 | 70.61 | 10.52 | 47928.76 | 5478.24 | 11.14 | 65.36 | 16.24 | 75.16 | 8.37 | 2.77 | 65.88 | 27.46 | 1.44 | 100.00 | 100.00 | -        | 92903.91 |
| 2014 | 81.38 | 70.80 | 10.58 | 47886.56 | 5580.49 | 11.21 | 72.95 | 16.15 | 77.86 | 8.73 | 2.48 | 65.92 | 27.78 | 1.47 | 100.00 | 100.00 | -        | 92923.36 |
| 2015 | 81.46 | 70.88 | 10.59 | 47834.79 | -       | -     | -     | -     | -     | -    | -    | 65.97 | 28.10 | 1.47 | 100.00 | 100.00 | -        | 92942.28 |
| 2016 | 81.54 | 70.94 | 10.60 | 47909.40 | -       | -     | -     | -     | -     | -    | -    | 66.03 | 28.45 | -    | -      | -      | -        | 92979.07 |
| 2017 | 81.77 | 70.44 | 11.33 | -        | -       | -     | -     | -     | -     | -    | -    | -     | -     | -    | -      | -      | -        | -        |

|            |      |       |       |      |         |       |      |       |       |       |      |      |       |      |      |       |       |          |          |
|------------|------|-------|-------|------|---------|-------|------|-------|-------|-------|------|------|-------|------|------|-------|-------|----------|----------|
| Azerbaijan | 1995 | 64.86 | 57.34 | 7.52 | 1216.08 | 18.02 | 5.79 | 87.35 | 66.36 | 24.03 | 1.39 | 4.40 | 52.21 | 8.70 | 2.29 | 62.70 | 70.20 | 42526.79 | 89449.89 |
|            | 1996 | 65.31 | 57.76 | 7.55 | 1219.51 | 24.78 | 6.12 | 86.00 | 65.14 | 24.26 | 1.49 | 4.64 | 51.90 | 8.90 | 2.06 | 62.60 | 70.90 | 38971.06 | 89676.85 |
|            | 1997 | 65.63 | 58.04 | 7.59 | 1277.85 | 27.27 | 5.45 | 80.26 | 62.17 | 22.54 | 1.23 | 4.22 | 51.59 | 9.03 | 2.07 | 62.50 | 71.70 | 37665.04 | 89905.16 |
|            | 1998 | 65.80 | 58.22 | 7.59 | 1392.36 | 30.27 | 5.43 | 80.65 | 67.24 | 16.63 | 0.90 | 4.53 | 51.28 | 9.11 | 2.00 | 62.40 | 72.40 | 39953.33 | 90151.23 |
|            | 1999 | 66.09 | 58.49 | 7.60 | 1482.33 | 30.50 | 5.36 | 79.37 | 64.77 | 18.39 | 0.99 | 4.37 | 51.19 | 9.20 | 2.07 | 64.00 | 73.20 | 40457.65 | 90394.94 |
|            | 2000 | 66.54 | 58.88 | 7.66 | 1633.39 | 30.30 | 4.67 | 77.68 | 63.27 | 18.56 | 0.87 | 3.80 | 51.39 | 9.29 | 2.00 | 65.60 | 74.10 | 42646.56 | 90614.03 |
|            | 2001 | 67.20 | 59.45 | 7.75 | 1781.25 | 31.17 | 4.48 | 77.94 | 63.22 | 18.88 | 0.85 | 3.64 | 51.59 | 9.51 | 1.80 | 67.20 | 75.00 | 41456.11 | 90704.36 |
|            | 2002 | 67.48 | 59.70 | 7.78 | 1955.41 | 33.62 | 4.47 | 79.33 | 65.27 | 17.73 | 0.79 | 3.68 | 51.79 | 9.73 | 1.80 | 68.80 | 75.80 | 40298.55 | 90754.26 |
|            | 2003 | 67.30 | 59.58 | 7.72 | 2158.01 | 57.04 | 6.56 | 88.55 | 77.35 | 12.64 | 0.83 | 5.73 | 51.99 | 9.90 | 1.90 | 70.50 | 76.70 | 44116.81 | 90793.29 |

|      |       |       |      |         |        |      |       |       |       |      |      |       |      |      |       |       |          |          |
|------|-------|-------|------|---------|--------|------|-------|-------|-------|------|------|-------|------|------|-------|-------|----------|----------|
| 2004 | 67.41 | 59.67 | 7.74 | 2357.40 | 81.26  | 7.92 | 90.78 | 79.00 | 12.98 | 1.03 | 6.90 | 52.19 | 9.93 | 2.05 | 72.10 | 77.60 | 45005.73 | 90796.05 |
| 2005 | 67.60 | 59.83 | 7.78 | 2949.44 | 121.89 | 7.86 | 92.75 | 82.36 | 11.20 | 0.88 | 6.98 | 52.39 | 9.80 | 2.00 | 73.70 | 78.50 | 47617.17 | 90776.26 |
| 2006 | 67.96 | 60.13 | 7.83 | 3923.66 | 149.73 | 6.17 | 91.21 | 78.43 | 14.01 | 0.86 | 5.30 | 52.59 | 9.60 | 1.97 | 75.30 | 79.30 | 48492.28 | 90618.62 |
| 2007 | 68.30 | 60.43 | 7.87 | 4851.18 | 192.38 | 5.10 | 89.85 | 19.24 | 19.24 | 0.98 | 4.11 | 52.79 | 9.30 | 1.97 | 76.80 | 80.20 | 45144.11 | 90452.06 |
| 2008 | 68.35 | 60.48 | 7.87 | 5262.10 | 241.56 | 4.37 | 88.42 | 71.75 | 18.85 | 0.82 | 3.55 | 52.99 | 8.93 | 1.90 | 78.40 | 81.00 | 53832.82 | 90286.55 |
| 2009 | 68.77 | 60.82 | 7.95 | 5639.00 | 288.54 | 5.85 | 88.83 | 68.50 | 22.89 | 1.34 | 4.51 | 53.19 | 8.58 | 1.82 | 80.00 | 81.90 | 49623.18 | 90145.76 |
| 2010 | 69.09 | 61.09 | 8.00 | 5842.81 | 310.15 | 5.33 | 88.58 | 69.18 | 21.90 | 1.17 | 4.17 | 53.40 | 8.28 | 1.92 | 81.60 | 82.80 | 50724.57 | 90013.36 |
| 2011 | 69.90 | 61.69 | 8.20 | 5770.97 | 358.26 | 5.01 | 89.04 | 69.83 | 21.58 | 1.08 | 3.93 | 53.62 | 8.13 | 1.96 | 83.20 | 83.60 | 53982.83 | 90013.14 |
| 2012 | 70.21 | 61.94 | 8.27 | 5820.08 | 399.50 | 5.37 | 89.13 | 69.02 | 22.56 | 1.21 | 4.16 | 53.86 | 8.02 | 2.00 | 84.70 | 84.50 | 56537.08 | 90030.00 |
| 2013 | 70.95 | 62.51 | 8.44 | 6078.32 | 432.42 | 5.54 | 89.69 | 71.06 | 20.77 | 1.15 | 4.39 | 54.10 | 7.95 | 1.98 | 86.30 | 85.30 | -        | 90081.93 |
| 2014 | 71.41 | 62.86 | 8.55 | 6122.98 | 471.41 | 6.04 | 90.55 | 72.08 | 20.39 | 1.23 | 4.81 | 54.36 | 7.96 | 1.97 | 87.90 | 86.20 | -        | 90158.17 |
| 2015 | 71.71 | 63.10 | 8.62 | 6117.03 | -      | -    | -     | -     | -     | -    | -    | 54.62 | 8.04 | 1.97 | 89.30 | 87.00 | -        | 90247.02 |
| 2016 | 72.03 | 63.40 | 8.63 | 5858.83 | -      | -    | -     | -     | -     | -    | -    | 54.90 | 8.24 | -    | -     | -     | -        | 90286.02 |
| 2017 | 70.76 | 62.05 | 8.71 | -       | -      | -    | -     | -     | -     | -    | -    | -     | -    | -    | -     | -     | -        | -        |

|                |      |       |       |      |          |         |      |       |       |       |      |      |       |      |      |       |       |         |          |
|----------------|------|-------|-------|------|----------|---------|------|-------|-------|-------|------|------|-------|------|------|-------|-------|---------|----------|
| <b>Bahamas</b> | 1995 | 70.55 | 62.10 | 8.45 | 21170.95 | 838.48  | 6.85 | 40.13 | 24.14 | 39.85 | 2.73 | 4.12 | 80.96 | 7.26 | 2.51 | 88.00 | 96.30 | 3532.13 | 90560.21 |
|                | 1996 | 70.68 | 62.23 | 8.45 | 21782.10 | 879.52  | 6.92 | 40.20 | 24.08 | 40.10 | 2.77 | 4.14 | 81.18 | 7.45 | 2.44 | 88.00 | 96.30 | 3856.65 | 90604.52 |
|                | 1997 | 70.81 | 62.34 | 8.47 | 21984.95 | 959.51  | 5.55 | 40.21 | 23.13 | 42.47 | 2.36 | 3.19 | 81.40 | 7.62 | 2.36 | 88.00 | 96.30 | 3535.75 | 90691.88 |
|                | 1998 | 70.95 | 62.47 | 8.48 | 22776.61 | 1031.03 | 5.59 | 40.22 | 21.94 | 45.46 | 2.54 | 3.05 | 81.61 | 7.79 | 2.26 | 88.00 | 96.30 | 3683.26 | 90784.96 |
|                | 1999 | 71.11 | 62.60 | 8.51 | 24111.86 | 1072.52 | 5.23 | 40.23 | 21.25 | 47.18 | 2.47 | 2.76 | 81.82 | 7.97 | 2.17 | 88.30 | 96.40 | 3580.50 | 90900.56 |
|                | 2000 | 71.30 | 62.76 | 8.54 | 24748.31 | 1106.28 | 5.21 | 40.25 | 20.91 | 48.05 | 2.50 | 2.71 | 82.01 | 8.19 | 2.07 | 88.60 | 96.60 | 3185.22 | 91020.53 |
|                | 2001 | 71.51 | 62.94 | 8.57 | 24958.65 | 1106.29 | 5.15 | 40.26 | 20.96 | 47.94 | 2.47 | 2.68 | 82.06 | 8.38 | 1.99 | 88.90 | 96.70 | 3151.87 | 91138.09 |
|                | 2002 | 71.68 | 63.08 | 8.61 | 25134.38 | 1182.81 | 5.26 | 43.77 | 22.86 | 47.77 | 2.51 | 2.75 | 82.12 | 8.58 | 1.93 | 89.20 | 96.90 | 3255.00 | 91273.28 |
|                | 2003 | 72.21 | 63.51 | 8.71 | 24298.62 | 1236.43 | 5.62 | 46.71 | 24.69 | 47.13 | 2.65 | 2.97 | 82.17 | 8.76 | 1.89 | 89.40 | 97.00 | 3556.08 | 91383.99 |
|                | 2004 | 72.80 | 63.97 | 8.83 | 23997.85 | 1325.13 | 6.02 | 49.74 | 25.96 | 47.81 | 2.88 | 3.14 | 82.23 | 8.93 | 1.86 | 89.70 | 97.20 | 3731.97 | 91495.33 |
|                | 2005 | 73.04 | 64.16 | 8.88 | 24305.99 | 1393.62 | 5.95 | 52.98 | 29.47 | 44.38 | 2.64 | 3.31 | 82.28 | 9.12 | 1.86 | 90.00 | 97.30 | 3854.11 | 91601.52 |
|                | 2006 | 73.39 | 64.46 | 8.93 | 24429.45 | 1644.47 | 6.93 | 51.70 | 27.30 | 47.21 | 3.27 | 3.66 | 82.33 | 9.29 | 1.87 | 90.30 | 97.50 | 4014.02 | 91646.57 |
|                | 2007 | 73.70 | 64.69 | 9.01 | 24312.40 | 1719.80 | 7.08 | 53.98 | 44.96 | 44.96 | 3.18 | 3.89 | 82.39 | 9.46 | 1.87 | 90.60 | 97.60 | 4128.89 | 91700.61 |
|                | 2008 | 73.78 | 64.76 | 9.02 | 23314.99 | 1727.69 | 7.30 | 53.98 | 29.18 | 45.94 | 3.35 | 3.95 | 82.44 | 9.61 | 1.88 | 90.90 | 97.80 | 4339.66 | 91767.58 |
|                | 2009 | 73.86 | 64.82 | 9.04 | 21951.15 | 1638.22 | 7.43 | 53.98 | 28.37 | 47.45 | 3.53 | 3.91 | 82.50 | 9.73 | 1.88 | 91.20 | 97.90 | 4335.93 | 91844.21 |

|      |       |       |      |          |         |      |       |       |       |      |      |       |       |      |       |       |         |          |
|------|-------|-------|------|----------|---------|------|-------|-------|-------|------|------|-------|-------|------|-------|-------|---------|----------|
| 2010 | 73.87 | 64.87 | 9.00 | 21921.56 | 1630.14 | 7.44 | 53.98 | 28.86 | 46.54 | 3.46 | 3.98 | 82.55 | 9.86  | 1.87 | 91.40 | 98.10 | 4570.36 | 91939.92 |
| 2011 | 73.83 | 64.83 | 9.00 | 21710.59 | 1642.39 | 7.63 | 53.98 | 28.70 | 46.83 | 3.58 | 4.06 | 82.61 | 10.15 | 1.85 | 91.70 | 98.20 | 4726.38 | 91977.42 |
| 2012 | 73.75 | 64.77 | 8.99 | 22050.20 | 1642.99 | 7.43 | 53.98 | 30.02 | 44.39 | 3.30 | 4.13 | 82.67 | 10.48 | 1.83 | 92.00 | 98.40 | 4865.21 | 92023.67 |
| 2013 | 73.76 | 64.77 | 8.99 | 21622.87 | 1572.26 | 7.05 | 53.98 | 30.41 | 43.67 | 3.08 | 3.97 | 82.73 | 10.84 | 1.81 | 92.00 | 98.40 | -       | 92072.50 |
| 2014 | 73.82 | 64.82 | 9.00 | 21078.68 | 1720.16 | 7.74 | 53.98 | 29.23 | 45.86 | 3.55 | 4.19 | 82.80 | 11.25 | 1.79 | 92.00 | 98.40 | -       | 92099.93 |
| 2015 | 73.68 | 64.69 | 8.99 | 20184.74 | -       | -    | -     | -     | -     | -    | -    | 82.87 | 11.70 | 1.78 | 92.00 | 98.40 | -       | 92148.35 |
| 2016 | 73.86 | 64.88 | 8.98 | 19991.09 | -       | -    | -     | -     | -     | -    | -    | 82.95 | 12.20 | -    | -     | -     | -       | 92201.74 |
| 2017 | 73.73 | 65.08 | 8.65 | -        | -       | -    | -     | -     | -     | -    | -    | -     | -     | -    | -     | -     | -       | -        |

|                |      |       |       |       |          |         |      |       |       |       |      |      |       |      |      |       |        |          |          |
|----------------|------|-------|-------|-------|----------|---------|------|-------|-------|-------|------|------|-------|------|------|-------|--------|----------|----------|
| <b>Bahrain</b> | 1995 | 70.19 | 60.06 | 10.13 | 21910.24 | 495.17  | 4.11 | 71.88 | 22.62 | 68.53 | 2.82 | 1.29 | 88.39 | 3.56 | 3.15 | 99.10 | 96.00  | 15330.07 | 92425.27 |
|                | 1996 | 70.63 | 60.42 | 10.21 | 22220.68 | 491.52  | 4.04 | 71.62 | 22.81 | 68.15 | 2.75 | 1.29 | 88.39 | 3.62 | 3.06 | 99.10 | 96.60  | 15986.52 | 92497.25 |
|                | 1997 | 71.02 | 60.71 | 10.31 | 22281.80 | 532.05  | 4.35 | 71.88 | 21.50 | 70.10 | 3.05 | 1.30 | 88.38 | 3.66 | 2.99 | 99.10 | 97.10  | -        | 92564.79 |
|                | 1998 | 71.32 | 60.94 | 10.39 | 22634.89 | 488.70  | 4.32 | 73.63 | 24.48 | 66.76 | 2.88 | 1.43 | 88.38 | 3.67 | 2.92 | 99.10 | 97.70  | -        | 92584.90 |
|                | 1999 | 71.67 | 61.18 | 10.49 | 22760.99 | 495.58  | 4.19 | 72.20 | 23.27 | 67.77 | 2.84 | 1.35 | 88.38 | 3.66 | 2.86 | 99.10 | 98.30  | 18047.95 | 92593.22 |
|                | 2000 | 71.41 | 60.97 | 10.44 | 22955.09 | 476.89  | 3.51 | 67.98 | 22.21 | 67.33 | 2.36 | 1.15 | 88.37 | 3.64 | 2.80 | 99.10 | 98.90  | -        | 92632.46 |
|                | 2001 | 72.07 | 61.48 | 10.59 | 22416.08 | 490.26  | 3.80 | 68.13 | 22.66 | 66.74 | 2.53 | 1.26 | 88.37 | 3.49 | 2.73 | 99.20 | 99.40  | 19051.28 | 92744.70 |
|                | 2002 | 72.41 | 61.76 | 10.65 | 22038.33 | 515.03  | 3.89 | 67.15 | 22.59 | 66.36 | 2.58 | 1.31 | 88.37 | 3.36 | 2.66 | 99.20 | 100.00 | 19967.01 | 92888.46 |
|                | 2003 | 72.72 | 62.02 | 10.70 | 22058.76 | 543.82  | 3.74 | 67.23 | 22.27 | 66.88 | 2.50 | 1.24 | 88.38 | 3.27 | 2.59 | 99.20 | 100.00 | 20539.29 | 93006.97 |
|                | 2004 | 73.00 | 62.25 | 10.75 | 22144.47 | 547.82  | 3.37 | 69.80 | 22.77 | 67.37 | 2.27 | 1.10 | 88.39 | 3.19 | 2.51 | 99.20 | 100.00 | 21451.12 | 93118.63 |
|                | 2005 | 73.47 | 62.65 | 10.81 | 22066.07 | 581.65  | 3.16 | 68.37 | 21.68 | 68.29 | 2.16 | 1.00 | 88.40 | 3.11 | 2.44 | 99.20 | 100.00 | 23432.38 | 93197.87 |
|                | 2006 | 73.66 | 62.84 | 10.83 | 21796.02 | 605.17  | 3.08 | 67.37 | 20.83 | 69.07 | 2.13 | 0.95 | 88.42 | 2.96 | 2.36 | 99.20 | 100.00 | 25118.22 | 93313.68 |
|                | 2007 | 74.44 | 63.39 | 11.04 | 21838.07 | 651.47  | 3.08 | 66.30 | 70.98 | 70.98 | 2.18 | 0.89 | 88.44 | 2.84 | 2.30 | 99.20 | 100.00 | -        | 93415.38 |
|                | 2008 | 75.03 | 63.86 | 11.17 | 21563.65 | 730.12  | 3.17 | 63.46 | 17.13 | 73.00 | 2.31 | 0.86 | 88.47 | 2.75 | 2.24 | 99.20 | 100.00 | -        | 93504.91 |
|                | 2009 | 75.54 | 64.26 | 11.28 | 20797.01 | 725.75  | 3.79 | 63.50 | 17.41 | 72.59 | 2.75 | 1.04 | 88.50 | 2.70 | 2.20 | 99.20 | 100.00 | 29249.58 | 93590.06 |
|                | 2010 | 75.95 | 64.65 | 11.30 | 20722.10 | 741.57  | 3.64 | 61.41 | 17.63 | 71.29 | 2.59 | 1.04 | 88.54 | 2.68 | 2.16 | 99.20 | 100.00 | 30921.97 | 93658.41 |
|                | 2011 | 76.11 | 64.73 | 11.39 | 20514.76 | 756.55  | 3.40 | 60.24 | 18.03 | 70.06 | 2.38 | 1.02 | 88.58 | 2.77 | 2.14 | 99.20 | 100.00 | 31941.04 | 93599.33 |
|                | 2012 | 76.23 | 64.84 | 11.40 | 20921.20 | 1006.91 | 4.37 | 68.66 | 25.21 | 63.28 | 2.76 | 1.60 | 88.62 | 2.84 | 2.12 | 99.20 | 100.00 | 32849.11 | 93545.09 |
|                | 2013 | 76.49 | 65.05 | 11.44 | 21799.65 | 1142.50 | 4.69 | 68.73 | 24.50 | 64.36 | 3.02 | 1.67 | 88.67 | 2.92 | 2.10 | 99.20 | 100.00 | -        | 93494.30 |
|                | 2014 | 76.58 | 65.14 | 11.44 | 22390.68 | 1242.84 | 4.98 | 63.51 | 23.34 | 63.25 | 3.15 | 1.83 | 88.72 | 2.98 | 2.08 | 99.20 | 100.00 | -        | 93454.36 |
|                | 2015 | 76.67 | 65.22 | 11.45 | 22436.21 | -       | -    | -     | -     | -     | -    | -    | 88.78 | 3.03 | 2.06 | 99.20 | 100.00 | -        | 93459.68 |

|                   |      |       |       |       |          |        |      |       |       |       |      |      |       |       |      |       |       |           |          |
|-------------------|------|-------|-------|-------|----------|--------|------|-------|-------|-------|------|------|-------|-------|------|-------|-------|-----------|----------|
|                   | 2016 | 76.77 | 65.36 | 11.41 | -        | -      | -    | -     | -     | -     | -    | -    | 88.84 | 3.03  | -    | -     | -     | -         | 93508.12 |
|                   | 2017 | 79.49 | 67.81 | 11.68 | -        | -      | -    | -     | -     | -     | -    | -    | -     | -     | -    | -     | -     | -         | -        |
| <b>Bangladesh</b> | 1995 | 61.70 | 53.10 | 8.60  | 445.92   | 10.30  | 3.22 | 95.86 | 60.16 | 37.24 | 1.20 | 2.02 | 21.69 | 5.94  | 3.71 | 40.00 | 72.10 | 136508.33 | 90981.00 |
|                   | 1996 | 62.58 | 53.85 | 8.73  | 456.24   | 11.13  | 2.96 | 96.16 | 62.70 | 34.80 | 1.03 | 1.93 | 22.06 | 6.06  | 3.59 | 41.10 | 72.90 | 139004.89 | 91049.98 |
|                   | 1997 | 63.45 | 54.58 | 8.87  | 466.77   | 8.55   | 2.25 | 98.15 | 55.92 | 43.02 | 0.97 | 1.28 | 22.44 | 6.18  | 3.48 | 42.20 | 73.60 | 140107.01 | 91106.07 |
|                   | 1998 | 64.28 | 55.28 | 9.00  | 480.87   | 8.63   | 2.25 | 97.47 | 56.99 | 41.54 | 0.94 | 1.32 | 22.82 | 6.28  | 3.37 | 43.30 | 74.40 | 129129.51 | 91179.51 |
|                   | 1999 | 65.09 | 55.95 | 9.14  | 493.26   | 8.95   | 2.29 | 97.58 | 57.78 | 40.78 | 0.94 | 1.36 | 23.20 | 6.38  | 3.27 | 44.30 | 75.20 | 138323.90 | 91244.35 |
|                   | 2000 | 65.41 | 56.27 | 9.15  | 509.29   | 9.13   | 2.33 | 97.41 | 57.78 | 40.69 | 0.95 | 1.38 | 23.59 | 6.48  | 3.17 | 45.40 | 76.00 | 136012.90 | 91321.95 |
|                   | 2001 | 65.95 | 56.72 | 9.23  | 525.07   | 9.64   | 2.47 | 97.01 | 56.76 | 41.50 | 1.02 | 1.45 | 24.10 | 6.59  | 3.07 | 46.50 | 76.70 | 142753.53 | 91377.55 |
|                   | 2002 | 66.45 | 57.15 | 9.30  | 535.25   | 10.33  | 2.59 | 95.99 | 56.46 | 41.18 | 1.07 | 1.53 | 24.76 | 6.69  | 2.97 | 47.60 | 77.50 | 143812.57 | 91419.51 |
|                   | 2003 | 66.98 | 57.60 | 9.38  | 550.86   | 10.85  | 2.51 | 96.36 | 58.91 | 38.87 | 0.98 | 1.53 | 25.43 | 6.78  | 2.88 | 48.60 | 78.30 | 146424.25 | 91467.68 |
|                   | 2004 | 67.54 | 58.08 | 9.47  | 570.34   | 11.96  | 2.62 | 96.32 | 57.94 | 39.84 | 1.04 | 1.57 | 26.11 | 6.86  | 2.78 | 49.70 | 79.10 | 147368.17 | 91511.01 |
|                   | 2005 | 67.93 | 58.43 | 9.50  | 598.62   | 12.44  | 2.68 | 93.79 | 59.92 | 36.11 | 0.97 | 1.71 | 26.81 | 6.95  | 2.69 | 50.70 | 79.80 | 151091.70 | 91568.56 |
|                   | 2006 | 68.37 | 58.87 | 9.50  | 630.05   | 13.51  | 2.80 | 93.44 | 58.72 | 37.15 | 1.04 | 1.76 | 27.52 | 7.08  | 2.60 | 51.80 | 80.60 | 155320.50 | 91610.88 |
|                   | 2007 | 68.77 | 59.21 | 9.56  | 666.40   | 15.24  | 2.80 | 94.53 | 35.29 | 35.29 | 0.99 | 1.81 | 28.24 | 7.20  | 2.52 | 52.80 | 81.30 | 161041.76 | 91666.14 |
|                   | 2008 | 69.41 | 59.79 | 9.63  | 698.56   | 17.60  | 2.85 | 90.71 | 60.31 | 33.51 | 0.95 | 1.89 | 28.97 | 7.30  | 2.45 | 53.80 | 82.00 | 164700.50 | 91722.21 |
|                   | 2009 | 69.93 | 60.25 | 9.68  | 725.77   | 19.82  | 2.91 | 92.71 | 61.13 | 34.06 | 0.99 | 1.92 | 29.71 | 7.37  | 2.38 | 54.80 | 82.70 | 169927.91 | 91802.85 |
|                   | 2010 | 70.26 | 60.62 | 9.64  | 757.67   | 23.14  | 3.06 | 92.78 | 60.97 | 34.28 | 1.05 | 2.01 | 30.46 | 7.42  | 2.33 | 55.80 | 83.50 | 177504.47 | 91876.38 |
|                   | 2011 | 70.85 | 61.09 | 9.75  | 797.41   | 25.41  | 3.16 | 91.51 | 61.32 | 32.99 | 1.04 | 2.11 | 31.23 | 7.52  | 2.28 | 56.80 | 84.20 | 180498.43 | 91929.37 |
|                   | 2012 | 71.09 | 61.35 | 9.74  | 839.51   | 25.58  | 3.08 | 93.03 | 63.30 | 31.95 | 0.98 | 2.10 | 31.99 | 7.61  | 2.24 | 57.70 | 84.80 | 183300.56 | 92004.38 |
|                   | 2013 | 71.47 | 61.69 | 9.78  | 879.58   | 28.16  | 2.88 | 92.98 | 66.84 | 28.11 | 0.81 | 2.07 | 32.75 | 7.67  | 2.20 | 58.70 | 85.50 | -         | 92079.66 |
|                   | 2014 | 71.87 | 62.04 | 9.83  | 922.16   | 30.83  | 2.82 | 92.89 | 66.98 | 27.90 | 0.79 | 2.03 | 33.52 | 7.70  | 2.17 | 59.60 | 86.20 | -         | 92156.21 |
|                   | 2015 | 72.25 | 62.38 | 9.87  | 971.64   | -      | -    | -     | -     | -     | -    | -    | 34.28 | 7.69  | 2.13 | 60.60 | 86.90 | -         | 92259.71 |
|                   | 2016 | 72.62 | 62.77 | 9.85  | 1029.58  | -      | -    | -     | -     | -     | -    | -    | 35.04 | 7.69  | -    | -     | -     | -         | 92343.96 |
|                   | 2017 | 73.12 | 63.06 | 10.06 | -        | -      | -    | -     | -     | -     | -    | -    | -     | -     | -    | -     | -     | -         | -        |
| <b>Barbados</b>   | 1995 | 73.83 | 64.81 | 9.02  | 12919.22 | 447.48 | 5.21 | 75.79 | 24.29 | 67.95 | 3.54 | 1.67 | 33.26 | 16.06 | 1.73 | 83.40 | 96.90 | 1099.56   | 92218.28 |
|                   | 1996 | 74.13 | 65.04 | 9.09  | 13381.99 | 462.00 | 5.07 | 75.84 | 24.01 | 68.34 | 3.46 | 1.60 | 33.39 | 16.28 | 1.73 | 84.00 | 97.00 | 1083.64   | 92298.23 |
|                   | 1997 | 74.42 | 65.26 | 9.16  | 13963.65 | 490.44 | 5.11 | 75.85 | 26.39 | 65.21 | 3.33 | 1.78 | 33.51 | 16.49 | 1.74 | 84.70 | 97.20 | 1123.04   | 92372.19 |
|                   | 1998 | 74.71 | 65.48 | 9.23  | 14431.62 | 526.21 | 4.88 | 76.43 | 26.45 | 65.39 | 3.19 | 1.69 | 33.63 | 16.73 | 1.74 | 85.40 | 97.30 | 1208.66   | 92444.04 |

|         |       |       |       |          |         |        |       |       |       |       |      |       |       |       |       |       |         |           |          |
|---------|-------|-------|-------|----------|---------|--------|-------|-------|-------|-------|------|-------|-------|-------|-------|-------|---------|-----------|----------|
| 1999    | 74.97 | 65.66 | 9.31  | 14426.32 | 564.43  | 5.01   | 77.14 | 26.68 | 65.41 | 3.28  | 1.73 | 33.76 | 17.00 | 1.74  | 86.10 | 97.50 | 1310.15 | 92505.72  |          |
| 2000    | 74.96 | 65.65 | 9.31  | 15017.08 | 595.97  | 5.16   | 77.27 | 26.43 | 65.80 | 3.39  | 1.76 | 33.83 | 17.33 | 1.74  | 86.80 | 97.60 | 1313.95 | 92559.28  |          |
| 2001    | 75.38 | 65.96 | 9.41  | 14616.18 | 629.15  | 5.47   | 76.92 | 24.96 | 67.56 | 3.70  | 1.78 | 33.65 | 17.32 | 1.75  | 87.40 | 97.80 | 1225.12 | 92612.01  |          |
| 2002    | 75.59 | 66.13 | 9.46  | 14688.78 | 672.51  | 5.76   | 77.19 | 24.10 | 68.78 | 3.96  | 1.80 | 33.47 | 17.33 | 1.75  | 88.10 | 97.90 | 1263.74 | 92663.76  |          |
| 2003    | 75.78 | 66.28 | 9.50  | 14964.72 | 698.67  | 5.82   | 79.07 | 26.81 | 66.09 | 3.84  | 1.97 | 33.29 | 17.34 | 1.75  | 88.80 | 98.10 | -       | 92717.42  |          |
| 2004    | 75.88 | 66.35 | 9.53  | 15128.95 | 734.16  | 5.71   | 80.00 | 27.93 | 65.09 | 3.72  | 1.99 | 33.12 | 17.35 | 1.76  | 89.50 | 98.20 | -       | 92761.19  |          |
| 2005    | 76.01 | 66.46 | 9.55  | 15676.11 | 763.74  | 5.38   | 80.54 | 28.67 | 64.40 | 3.46  | 1.91 | 32.94 | 17.35 | 1.76  | 90.10 | 98.40 | -       | 92807.41  |          |
| 2006    | 76.12 | 66.56 | 9.56  | 16502.69 | 825.34  | 5.27   | 81.25 | 28.63 | 64.76 | 3.42  | 1.86 | 32.76 | 17.47 | 1.76  | 90.80 | 98.50 | -       | 92850.60  |          |
| 2007    | 76.32 | 66.70 | 9.62  | 16726.28 | 928.29  | 5.64   | 80.70 | 66.65 | 66.65 | 3.76  | 1.88 | 32.59 | 17.61 | 1.77  | 91.50 | 98.70 | -       | 92900.09  |          |
| 2008    | 76.58 | 66.89 | 9.69  | 16721.73 | 996.66  | 6.01   | 80.56 | 26.23 | 67.44 | 4.06  | 1.96 | 32.41 | 17.79 | 1.77  | 92.20 | 98.80 | -       | 92957.61  |          |
| 2009    | 76.73 | 67.00 | 9.73  | 15979.68 | 1026.94 | 6.21   | 80.56 | 26.82 | 66.70 | 4.14  | 2.07 | 32.24 | 18.06 | 1.78  | 92.80 | 99.00 | -       | 93009.20  |          |
| 2010    | 76.77 | 67.05 | 9.73  | 15959.03 | 980.96  | 6.17   | 80.56 | 28.19 | 65.00 | 4.01  | 2.16 | 32.06 | 18.44 | 1.78  | 93.50 | 99.10 | -       | 93068.58  |          |
| 2011    | 76.79 | 67.04 | 9.75  | 15972.77 | 1035.87 | 6.67   | 81.88 | 30.86 | 62.31 | 4.16  | 2.51 | 31.91 | 18.84 | 1.79  | 94.20 | 99.30 | -       | 93117.52  |          |
| 2012    | 76.93 | 67.14 | 9.79  | 15961.70 | 1137.95 | 7.43   | 81.88 | 28.52 | 65.17 | 4.84  | 2.59 | 31.77 | 19.34 | 1.79  | 94.90 | 99.40 | 1540.62 | 93167.74  |          |
| 2013    | 76.93 | 67.13 | 9.79  | 15910.93 | 1146.95 | 7.57   | 81.88 | 28.87 | 64.74 | 4.90  | 2.67 | 31.65 | 19.94 | 1.79  | 95.50 | 99.60 | -       | 93217.33  |          |
| 2014    | 76.80 | 67.04 | 9.76  | 15864.62 | 1146.04 | 7.47   | 81.88 | 29.87 | 63.52 | 4.74  | 2.72 | 31.55 | 20.60 | 1.79  | 96.20 | 99.70 | -       | 93273.49  |          |
| 2015    | 76.68 | 66.95 | 9.74  | 15961.20 | -       | -      | -     | -     | -     | -     | -    | 31.48 | 21.31 | 1.80  | 96.20 | 99.70 | -       | 93338.18  |          |
| 2016    | 76.62 | 66.92 | 9.70  | 16242.77 | -       | -      | -     | -     | -     | -     | -    | 31.42 | 21.96 | -     | -     | -     | -       | 93409.24  |          |
| 2017    | 77.13 | 67.89 | 9.24  | -        | -       | -      | -     | -     | -     | -     | -    | -     | -     | -     | -     | -     | -       | -         |          |
| Belarus | 1995  | 68.23 | 59.78 | 8.45     | 2024.69 | 69.91  | 6.74  | 64.51 | 18.63 | 71.12 | 4.79 | 1.95  | 67.93 | 18.89 | 1.41  | 95.00 | 99.50   | 130352.35 | 91726.01 |
|         | 1996  | 68.25 | 59.82 | 8.43     | 2088.35 | 89.29  | 6.24  | 59.84 | 14.77 | 75.32 | 4.70 | 1.54  | 68.31 | 19.27 | 1.34  | 95.00 | 99.50   | 130526.99 | 91856.63 |
|         | 1997  | 68.14 | 59.75 | 8.39     | 2336.31 | 92.10  | 6.59  | 49.78 | 8.80  | 82.32 | 5.43 | 1.17  | 68.69 | 19.48 | 1.25  | 95.00 | 99.50   | 131300.40 | 92003.84 |
|         | 1998  | 68.06 | 59.69 | 8.37     | 2544.63 | 90.21  | 5.96  | 58.33 | 13.39 | 77.04 | 4.59 | 1.37  | 69.06 | 19.59 | 1.30  | 94.90 | 99.50   | 87300.09  | 92139.57 |
|         | 1999  | 67.95 | 59.61 | 8.34     | 2642.24 | 74.77  | 6.16  | 56.22 | 13.20 | 76.51 | 4.72 | 1.45  | 69.48 | 19.69 | 1.31  | 94.90 | 99.50   | 87514.80  | 92287.29 |
|         | 2000  | 68.34 | 59.91 | 8.43     | 2808.69 | 74.97  | 6.13  | 57.13 | 14.01 | 75.49 | 4.63 | 1.50  | 69.97 | 19.85 | 1.32  | 94.80 | 99.50   | 83387.55  | 92423.30 |
|         | 2001  | 68.16 | 59.79 | 8.38     | 2956.54 | 82.23  | 6.62  | 64.26 | 18.28 | 71.55 | 4.74 | 1.88  | 70.46 | 20.23 | 1.29  | 94.80 | 99.50   | 80803.90  | 92472.46 |
|         | 2002  | 67.96 | 59.64 | 8.32     | 3125.54 | 95.75  | 6.47  | 69.42 | 20.49 | 70.49 | 4.56 | 1.91  | 70.94 | 20.66 | 1.24  | 94.80 | 99.50   | 89727.11  | 92522.08 |
|         | 2003  | 68.30 | 59.91 | 8.39     | 3369.17 | 119.76 | 6.59  | 69.64 | 18.22 | 73.84 | 4.87 | 1.72  | 71.42 | 21.03 | 1.23  | 94.70 | 99.50   | 82041.12  | 92574.49 |
|         | 2004  | 68.57 | 60.12 | 8.45     | 3780.64 | 157.24 | 6.59  | 68.32 | 17.26 | 74.74 | 4.92 | 1.66  | 71.89 | 21.22 | 1.23  | 94.70 | 99.50   | 85627.16  | 92602.19 |

|      |       |       |       |         |        |      |       |       |       |      |      |       |       |      |       |       |           |          |
|------|-------|-------|-------|---------|--------|------|-------|-------|-------|------|------|-------|-------|------|-------|-------|-----------|----------|
| 2005 | 68.73 | 60.26 | 8.47  | 4164.36 | 215.87 | 6.89 | 73.38 | 19.86 | 72.94 | 5.02 | 1.86 | 72.35 | 21.15 | 1.25 | 94.60 | 99.50 | 89989.72  | 92632.73 |
| 2006 | 69.23 | 60.65 | 8.58  | 4608.93 | 244.18 | 6.34 | 74.51 | 22.18 | 70.23 | 4.45 | 1.89 | 72.82 | 21.05 | 1.34 | 94.60 | 99.60 | 94475.09  | 92585.23 |
| 2007 | 69.83 | 61.08 | 8.75  | 5028.32 | 304.99 | 6.44 | 76.44 | 69.15 | 69.15 | 4.45 | 1.99 | 73.27 | 20.73 | 1.43 | 94.60 | 99.60 | 95710.82  | 92531.54 |
| 2008 | 70.09 | 61.27 | 8.82  | 5560.38 | 379.11 | 5.95 | 78.61 | 27.45 | 65.08 | 3.87 | 2.08 | 73.73 | 20.30 | 1.49 | 94.50 | 99.60 | 100860.18 | 92476.48 |
| 2009 | 70.21 | 61.35 | 8.86  | 5583.94 | 313.29 | 6.09 | 74.76 | 26.90 | 64.02 | 3.90 | 2.19 | 74.17 | 19.91 | 1.51 | 94.50 | 99.60 | 101754.79 | 92427.05 |
| 2010 | 70.34 | 61.49 | 8.85  | 6029.40 | 322.54 | 5.55 | 88.94 | 19.85 | 77.69 | 4.31 | 1.24 | 74.62 | 19.65 | 1.49 | 94.50 | 99.60 | 108204.55 | 92386.82 |
| 2011 | 70.62 | 61.66 | 8.96  | 6375.35 | 293.12 | 4.92 | 90.40 | 26.64 | 70.53 | 3.47 | 1.45 | 75.05 | 19.68 | 1.52 | 94.40 | 99.60 | 108921.43 | 92310.41 |
| 2012 | 71.86 | 62.63 | 9.23  | 6491.67 | 335.97 | 5.01 | 85.32 | 19.46 | 77.19 | 3.87 | 1.14 | 75.47 | 19.82 | 1.62 | 94.40 | 99.70 | 109647.24 | 92231.55 |
| 2013 | 72.49 | 63.13 | 9.36  | 6557.11 | 465.17 | 6.07 | 90.92 | 30.69 | 66.24 | 4.02 | 2.05 | 75.88 | 20.05 | 1.67 | 94.40 | 99.70 | -         | 92164.51 |
| 2014 | 73.14 | 63.63 | 9.51  | 6664.10 | 450.21 | 5.69 | 93.62 | 32.03 | 65.79 | 3.74 | 1.95 | 76.28 | 20.33 | 1.70 | 94.30 | 99.70 | -         | 92107.62 |
| 2015 | 73.41 | 63.85 | 9.57  | 6398.69 | -      | -    | -     | -     | -     | -    | -    | 76.67 | 20.62 | 1.72 | 94.30 | 99.70 | -         | 92089.82 |
| 2016 | 73.60 | 64.09 | 9.51  | 6217.72 | -      | -    | -     | -     | -     | -    | -    | 77.05 | 21.11 | -    | -     | -     | -         | 92092.09 |
| 2017 | 74.03 | 63.92 | 10.11 | -       | -      | -    | -     | -     | -     | -    | -    | -     | -     | -    | -     | -     | -         | -        |

|         |      |       |       |       |          |         |       |       |       |       |      |      |       |       |      |       |        |           |          |
|---------|------|-------|-------|-------|----------|---------|-------|-------|-------|-------|------|------|-------|-------|------|-------|--------|-----------|----------|
| Belgium | 1995 | 76.90 | 66.97 | 9.92  | 35228.34 | 2137.81 | 7.61  | 84.42 | 19.59 | 76.80 | 5.85 | 1.77 | 96.78 | 24.07 | 1.56 | 99.50 | 100.00 | 146712.33 | 89866.88 |
|         | 1996 | 77.13 | 67.16 | 9.97  | 35719.81 | 2150.83 | 7.91  | 86.45 | 18.87 | 78.18 | 6.18 | 1.73 | 96.85 | 24.47 | 1.59 | 99.50 | 100.00 | 153314.45 | 89874.81 |
|         | 1997 | 77.37 | 67.34 | 10.03 | 36955.64 | 1907.11 | 7.77  | 85.83 | 21.13 | 75.38 | 5.85 | 1.91 | 96.92 | 24.84 | 1.60 | 99.50 | 100.00 | 149509.67 | 89904.79 |
|         | 1998 | 77.52 | 67.44 | 10.08 | 37605.23 | 1977.77 | 7.89  | 84.09 | 21.19 | 74.80 | 5.90 | 1.99 | 97.00 | 25.18 | 1.60 | 99.50 | 100.00 | 152174.81 | 89922.83 |
|         | 1999 | 77.68 | 67.55 | 10.13 | 38856.06 | 2012.69 | 8.08  | 82.04 | 20.86 | 74.58 | 6.02 | 2.05 | 97.07 | 25.47 | 1.62 | 99.50 | 100.00 | 147499.80 | 89942.54 |
|         | 2000 | 77.83 | 67.64 | 10.19 | 40170.42 | 1845.34 | 8.12  | 80.89 | 20.54 | 74.61 | 6.06 | 2.06 | 97.13 | 25.72 | 1.67 | 99.50 | 100.00 | 147051.20 | 89960.38 |
|         | 2001 | 78.04 | 67.79 | 10.25 | 40357.37 | 1878.37 | 8.29  | 80.16 | 19.71 | 75.41 | 6.25 | 2.04 | 97.18 | 25.95 | 1.67 | 99.50 | 100.00 | 144535.00 | 89997.15 |
|         | 2002 | 78.25 | 67.94 | 10.31 | 40892.22 | 2075.07 | 8.46  | 81.45 | 21.34 | 73.80 | 6.24 | 2.22 | 97.24 | 26.13 | 1.65 | 99.50 | 100.00 | 138048.51 | 90032.28 |
|         | 2003 | 78.53 | 68.13 | 10.40 | 41036.80 | 2800.31 | 9.30  | 79.20 | 20.31 | 74.36 | 6.92 | 2.39 | 97.29 | 26.27 | 1.67 | 99.50 | 100.00 | 144031.57 | 90082.08 |
|         | 2004 | 78.90 | 68.38 | 10.52 | 42344.69 | 3242.84 | 9.32  | 77.29 | 18.19 | 76.47 | 7.13 | 2.19 | 97.35 | 26.35 | 1.72 | 99.50 | 100.00 | 141187.99 | 90102.78 |
|         | 2005 | 79.16 | 68.54 | 10.61 | 42994.36 | 3339.72 | 9.24  | 76.32 | 17.60 | 76.94 | 7.11 | 2.13 | 97.40 | 26.37 | 1.76 | 99.50 | 100.00 | 136696.04 | 90123.08 |
|         | 2006 | 79.42 | 68.77 | 10.65 | 43782.14 | 3489.81 | 9.17  | 77.46 | 18.66 | 75.92 | 6.96 | 2.21 | 97.45 | 26.40 | 1.80 | 99.50 | 100.00 | 134802.75 | 90195.89 |
|         | 2007 | 79.54 | 68.90 | 10.65 | 44960.80 | 4017.79 | 9.25  | 78.08 | 75.15 | 75.15 | 6.95 | 2.30 | 97.50 | 26.34 | 1.82 | 99.50 | 100.00 | 131823.17 | 90281.00 |
|         | 2008 | 79.65 | 69.01 | 10.65 | 44956.37 | 4565.95 | 9.60  | 80.52 | 18.47 | 77.06 | 7.40 | 2.20 | 97.55 | 26.25 | 1.85 | 99.50 | 100.00 | 137213.87 | 90377.37 |
|         | 2009 | 79.82 | 69.16 | 10.66 | 43591.27 | 4574.69 | 10.39 | 80.47 | 18.20 | 77.39 | 8.04 | 2.35 | 97.59 | 26.23 | 1.84 | 99.50 | 100.00 | 131110.29 | 90489.63 |
|         | 2010 | 80.03 | 69.33 | 10.70 | 44380.18 | 4419.44 | 10.17 | 80.32 | 17.93 | 77.68 | 7.90 | 2.27 | 97.64 | 26.35 | 1.86 | 99.50 | 100.00 | 138029.41 | 90628.96 |

|        |       |       |       |          |         |        |       |       |       |       |      |       |       |      |       |        |           |          |          |
|--------|-------|-------|-------|----------|---------|--------|-------|-------|-------|-------|------|-------|-------|------|-------|--------|-----------|----------|----------|
| 2011   | 80.23 | 69.51 | 10.72 | 44556.04 | 4864.15 | 10.42  | 80.78 | 18.73 | 76.81 | 8.01  | 2.42 | 97.69 | 26.56 | 1.81 | 99.50 | 100.00 | 137517.87 | 90615.14 |          |
| 2012   | 80.36 | 69.63 | 10.73 | 44337.58 | 4587.91 | 10.54  | 79.64 | 17.78 | 77.67 | 8.19  | 2.35 | 97.73 | 26.87 | 1.79 | 99.50 | 100.00 | 133373.68 | 90623.55 |          |
| 2013   | 80.59 | 69.82 | 10.77 | 44209.74 | 4813.42 | 10.57  | 80.45 | 17.85 | 77.81 | 8.23  | 2.35 | 97.78 | 27.26 | 1.75 | 99.50 | 100.00 | -         | 90632.08 |          |
| 2014   | 80.91 | 70.07 | 10.84 | 44702.32 | 4884.07 | 10.59  | 80.45 | 17.81 | 77.87 | 8.25  | 2.34 | 97.82 | 27.64 | 1.74 | 99.50 | 100.00 | -         | 90645.96 |          |
| 2015   | 80.89 | 70.09 | 10.81 | 45068.25 | -       | -      | -     | -     | -     | -     | -    | 97.86 | 27.97 | 1.74 | 99.50 | 100.00 | -         | 90644.85 |          |
| 2016   | 80.91 | 70.11 | 10.80 | 45430.91 | -       | -      | -     | -     | -     | -     | -    | 97.90 | 28.43 | -    | -     | -      | -         | 90658.92 |          |
| 2017   | 81.38 | 69.62 | 11.75 | -        | -       | -      | -     | -     | -     | -     | -    | -     | -     | -    | -     | -      | -         | -        |          |
| Belize | 1995  | 70.43 | 61.92 | 8.52     | 3424.09 | 127.21 | 4.25  | 79.96 | 30.39 | 62.00 | 2.63 | 1.61  | 47.48 | 8.57 | 4.11  | 79.30  | 79.00     | 602.93   | 89394.27 |
|        | 1996  | 70.29 | 61.80 | 8.49     | 3363.90 | 108.98 | 3.63  | 78.80 | 34.35 | 56.40 | 2.05 | 1.58  | 47.53 | 8.23 | 4.01  | 80.00  | 80.20     | 573.96   | 89489.20 |
|        | 1997  | 69.51 | 61.17 | 8.34     | 3358.51 | 115.72 | 3.92  | 79.36 | 33.53 | 57.74 | 2.26 | 1.66  | 47.57 | 7.87 | 3.91  | 80.60  | 81.40     | 662.67   | 89528.97 |
|        | 1998  | 69.31 | 61.00 | 8.31     | 3352.85 | 113.56 | 3.80  | 78.76 | 34.03 | 56.79 | 2.16 | 1.64  | 47.62 | 7.55 | 3.81  | 81.30  | 82.70     | 923.14   | 89555.97 |
|        | 1999  | 69.00 | 60.74 | 8.27     | 3513.86 | 112.39 | 3.67  | 78.65 | 34.99 | 55.51 | 2.04 | 1.63  | 47.66 | 7.28 | 3.70  | 82.00  | 83.90     | 1143.68  | 89541.68 |
|        | 2000  | 68.63 | 60.40 | 8.23     | 3838.89 | 133.72 | 3.98  | 82.30 | 39.01 | 52.61 | 2.09 | 1.88  | 47.66 | 7.06 | 3.60  | 82.70  | 85.10     | 1676.47  | 89511.62 |
|        | 2001  | 68.45 | 60.27 | 8.18     | 3910.19 | 153.94 | 4.50  | 81.61 | 34.68 | 57.51 | 2.59 | 1.91  | 47.39 | 6.82 | 3.50  | 83.30  | 86.30     | 1013.48  | 89497.19 |
|        | 2002  | 68.90 | 60.64 | 8.26     | 3997.12 | 155.77 | 4.38  | 81.62 | 35.83 | 56.09 | 2.46 | 1.92  | 47.12 | 6.59 | 3.39  | 84.00  | 87.50     | 1702.59  | 89484.26 |
|        | 2003  | 69.20 | 60.88 | 8.32     | 4257.49 | 166.87 | 4.53  | 79.35 | 34.04 | 57.10 | 2.59 | 1.95  | 46.85 | 6.34 | 3.28  | 84.60  | 88.70     | 3604.31  | 89492.32 |
|        | 2004  | 69.53 | 61.14 | 8.40     | 4343.18 | 168.36 | 4.39  | 79.37 | 34.08 | 57.06 | 2.51 | 1.89  | 46.58 | 6.08 | 3.18  | 85.30  | 89.90     | 1146.09  | 89524.59 |
|        | 2005  | 69.84 | 61.36 | 8.47     | 4342.13 | 175.14 | 4.45  | 79.37 | 32.17 | 59.47 | 2.65 | 1.80  | 46.31 | 5.80 | 3.07  | 86.00  | 91.10     | 2022.18  | 89579.54 |
|        | 2006  | 70.16 | 61.64 | 8.52     | 4424.44 | 184.27 | 4.40  | 75.03 | 29.52 | 60.65 | 2.67 | 1.73  | 46.04 | 5.86 | 2.98  | 86.60  | 92.30     | 1276.56  | 89659.67 |
|        | 2007  | 70.46 | 61.88 | 8.58     | 4358.47 | 205.89 | 4.76  | 75.13 | 63.49 | 63.49 | 3.02 | 1.74  | 45.77 | 5.93 | 2.89  | 87.30  | 93.50     | 1802.16  | 89749.76 |
|        | 2008  | 70.68 | 62.05 | 8.63     | 4385.18 | 227.66 | 5.09  | 73.16 | 25.89 | 64.61 | 3.29 | 1.80  | 45.50 | 6.02 | 2.82  | 87.90  | 94.70     | 1408.15  | 89841.18 |
|        | 2009  | 70.86 | 62.18 | 8.69     | 4307.22 | 247.34 | 5.81  | 73.16 | 24.50 | 66.51 | 3.86 | 1.95  | 45.23 | 6.14 | 2.76  | 88.60  | 96.00     | 1534.36  | 89935.55 |
|        | 2010  | 71.14 | 62.38 | 8.76     | 4344.15 | 253.95 | 5.85  | 69.55 | 23.65 | 66.00 | 3.86 | 1.99  | 44.96 | 6.32 | 2.72  | 89.20  | 97.20     | 1498.88  | 90036.10 |
|        | 2011  | 71.28 | 62.51 | 8.77     | 4333.36 | 253.19 | 5.61  | 69.77 | 23.40 | 66.47 | 3.73 | 1.88  | 44.72 | 6.20 | 2.68  | 89.90  | 98.50     | 1536.24  | 90070.68 |
|        | 2012  | 71.41 | 62.64 | 8.77     | 4398.76 | 254.89 | 5.45  | 69.76 | 23.99 | 65.61 | 3.58 | 1.88  | 44.50 | 6.10 | 2.64  | 90.20  | 99.30     | 1569.86  | 90101.95 |
|        | 2013  | 71.50 | 62.73 | 8.77     | 4359.71 | 273.27 | 5.79  | 69.76 | 24.26 | 65.23 | 3.78 | 2.01  | 44.30 | 6.01 | 2.61  | 90.60  | 99.50     | -        | 90140.78 |
|        | 2014  | 71.61 | 62.83 | 8.78     | 4415.99 | 278.58 | 5.79  | 69.76 | 23.01 | 67.02 | 3.88 | 1.91  | 44.12 | 5.94 | 2.58  | 90.50  | 99.50     | -        | 90185.98 |
|        | 2015  | 71.73 | 62.94 | 8.79     | 4446.79 | -      | -     | -     | -     | -     | -    | -     | 43.97 | 5.90 | 2.54  | 90.50  | 99.50     | -        | 90238.23 |
|        | 2016  | 71.84 | 63.05 | 8.79     | 4328.02 | -      | -     | -     | -     | -     | -    | -     | 43.85 | 5.92 | -     | -      | -         | -        | 90287.78 |

|                |      |       |       |      |          |       |      |       |       |       |      |      |        |      |      |       |       |          |          |
|----------------|------|-------|-------|------|----------|-------|------|-------|-------|-------|------|------|--------|------|------|-------|-------|----------|----------|
|                | 2017 | 74.16 | 64.92 | 9.24 | -        | -     | -    | -     | -     | -     | -    | -    | -      | -    | -    | -     | -     | -        | -        |
| <b>Benin</b>   | 1995 | 56.51 | 48.55 | 7.96 | 631.17   | 17.01 | 4.69 | 99.89 | 54.94 | 45.00 | 2.11 | 2.58 | 36.76  | 6.80 | 6.36 | 9.40  | 61.70 | 45322.67 | 90242.72 |
|                | 1996 | 56.47 | 48.58 | 7.88 | 638.08   | 17.53 | 4.59 | 99.89 | 55.65 | 44.29 | 2.03 | 2.55 | 37.07  | 6.71 | 6.28 | 9.90  | 62.60 | 45079.96 | 90222.59 |
|                | 1997 | 56.89 | 48.97 | 7.92 | 654.54   | 15.37 | 4.31 | 99.89 | 57.86 | 42.08 | 1.81 | 2.50 | 37.39  | 6.62 | 6.20 | 10.40 | 63.40 | 46264.14 | 90206.36 |
|                | 1998 | 57.11 | 49.19 | 7.92 | 660.63   | 16.45 | 4.39 | 99.89 | 55.71 | 44.23 | 1.94 | 2.45 | 37.70  | 6.51 | 6.12 | 10.90 | 64.30 | 49501.74 | 90201.15 |
|                | 1999 | 57.38 | 49.45 | 7.93 | 675.68   | 16.94 | 4.59 | 99.89 | 53.94 | 46.00 | 2.11 | 2.48 | 38.02  | 6.41 | 6.04 | 11.40 | 65.10 | 43491.03 | 90189.34 |
|                | 2000 | 57.60 | 49.67 | 7.94 | 694.24   | 14.73 | 4.34 | 99.89 | 55.74 | 44.20 | 1.92 | 2.42 | 38.33  | 6.31 | 5.96 | 11.90 | 66.00 | 40254.01 | 90202.35 |
|                | 2001 | 57.80 | 49.90 | 7.90 | 709.47   | 16.33 | 4.69 | 99.88 | 50.69 | 49.25 | 2.31 | 2.38 | 38.65  | 6.25 | 5.89 | 12.40 | 66.90 | 33015.41 | 90168.94 |
|                | 2002 | 58.27 | 50.34 | 7.93 | 720.17   | 16.19 | 4.27 | 99.88 | 55.75 | 44.19 | 1.89 | 2.39 | 38.97  | 6.19 | 5.82 | 12.90 | 67.70 | 47757.34 | 90126.40 |
|                | 2003 | 58.62 | 50.66 | 7.95 | 722.67   | 21.49 | 4.63 | 99.88 | 52.19 | 47.75 | 2.21 | 2.42 | 39.30  | 6.12 | 5.75 | 13.40 | 68.60 | 36885.54 | 90081.97 |
|                | 2004 | 59.05 | 51.04 | 8.00 | 732.34   | 23.32 | 4.56 | 99.52 | 52.07 | 47.68 | 2.18 | 2.39 | 39.64  | 6.07 | 5.69 | 14.00 | 69.40 | 31729.03 | 90052.54 |
|                | 2005 | 59.49 | 51.43 | 8.07 | 723.20   | 25.21 | 4.73 | 94.87 | 47.72 | 49.69 | 2.35 | 2.38 | 39.98  | 6.02 | 5.63 | 14.50 | 70.30 | 48572.51 | 90028.91 |
|                | 2006 | 59.88 | 51.80 | 8.08 | 730.28   | 26.47 | 4.75 | 94.83 | 47.21 | 50.22 | 2.39 | 2.36 | 40.34  | 6.05 | 5.58 | 15.10 | 71.10 | 36385.67 | 90021.06 |
|                | 2007 | 60.28 | 52.17 | 8.11 | 752.22   | 28.77 | 4.55 | 93.75 | 50.75 | 50.75 | 2.31 | 2.24 | 40.70  | 6.08 | 5.52 | 15.60 | 72.00 | 39886.08 | 90024.79 |
|                | 2008 | 60.79 | 52.63 | 8.16 | 767.06   | 31.02 | 4.20 | 91.14 | 44.71 | 50.95 | 2.14 | 2.06 | 41.08  | 6.11 | 5.47 | 16.20 | 72.80 | 37639.93 | 90029.88 |
|                | 2009 | 61.38 | 53.14 | 8.24 | 763.11   | 31.81 | 4.46 | 88.90 | 42.53 | 52.16 | 2.33 | 2.14 | 41.46  | 6.11 | 5.42 | 16.70 | 73.70 | 38068.37 | 90053.75 |
|                | 2010 | 61.83 | 53.54 | 8.29 | 757.70   | 34.14 | 4.95 | 85.16 | 38.89 | 54.33 | 2.69 | 2.26 | 41.85  | 6.10 | 5.36 | 17.30 | 74.50 | 33029.82 | 90084.73 |
|                | 2011 | 62.25 | 53.97 | 8.28 | 758.58   | 40.02 | 5.37 | 78.95 | 35.88 | 54.56 | 2.93 | 2.44 | 42.26  | 6.11 | 5.31 | 17.80 | 75.30 | 33289.55 | 90081.53 |
|                | 2012 | 62.63 | 54.33 | 8.30 | 773.14   | 36.45 | 4.86 | 69.80 | 38.84 | 44.35 | 2.15 | 2.70 | 42.67  | 6.09 | 5.25 | 18.40 | 76.20 | 33533.10 | 90097.10 |
|                | 2013 | 63.02 | 54.69 | 8.33 | 805.94   | 36.96 | 4.59 | 76.67 | 39.68 | 48.25 | 2.22 | 2.38 | 43.09  | 6.06 | 5.18 | 19.00 | 77.00 | -        | 90090.77 |
|                | 2014 | 63.41 | 55.05 | 8.36 | 833.66   | 37.89 | 4.59 | 76.67 | 39.10 | 49.00 | 2.25 | 2.34 | 43.51  | 6.03 | 5.12 | 19.60 | 77.80 | -        | 90100.92 |
|                | 2015 | 63.89 | 55.47 | 8.42 | 827.85   | -     | -    | -     | -     | -     | -    | -    | 43.95  | 6.01 | 5.05 | 19.70 | 77.90 | -        | 90123.37 |
|                | 2016 | 64.42 | 55.95 | 8.48 | 837.34   | -     | -    | -     | -     | -     | -    | -    | 44.40  | 6.00 | -    | -     | -     | -        | 90128.30 |
|                | 2017 | 64.63 | 55.84 | 8.79 | -        | -     | -    | -     | -     | -     | -    | -    | -      | -    | -    | -     | -     | -        | -        |
| <b>Bermuda</b> | 1995 | 71.16 | 62.84 | 8.32 | 65690.96 | -     | -    | -     | -     | -     | -    | -    | 100.00 | -    | 1.80 | -     | -     | 496.77   | 90420.13 |
|                | 1996 | 71.21 | 62.92 | 8.29 | 66969.93 | -     | -    | -     | -     | -     | -    | -    | 100.00 | -    | -    | -     | -     | 504.10   | 90430.59 |
|                | 1997 | 72.16 | 63.70 | 8.46 | 69624.44 | -     | -    | -     | -     | -     | -    | -    | 100.00 | -    | -    | -     | -     | -        | 90438.36 |
|                | 1998 | 72.56 | 64.05 | 8.51 | 71810.38 | -     | -    | -     | -     | -     | -    | -    | 100.00 | -    | -    | -     | -     | 461.72   | 90448.51 |
|                | 1999 | 72.69 | 64.17 | 8.52 | 73825.18 | -     | -    | -     | -     | -     | -    | -    | 100.00 | -    | -    | -     | -     | 492.03   | 90474.88 |

|      |       |       |      |          |   |   |   |   |   |   |   |   |        |   |      |   |   |        |          |
|------|-------|-------|------|----------|---|---|---|---|---|---|---|---|--------|---|------|---|---|--------|----------|
| 2000 | 72.51 | 64.07 | 8.45 | 79988.35 | - | - | - | - | - | - | - | - | 100.00 | - | 1.74 | - | - | 518.97 | 90511.48 |
| 2001 | 73.51 | 64.84 | 8.67 | 84844.74 | - | - | - | - | - | - | - | - | 100.00 | - | 1.75 | - | - | 510.11 | 90542.07 |
| 2002 | 73.82 | 65.11 | 8.72 | 83048.80 | - | - | - | - | - | - | - | - | 100.00 | - | 1.77 | - | - | 527.10 | 90577.95 |
| 2003 | 74.11 | 65.32 | 8.79 | 85321.24 | - | - | - | - | - | - | - | - | 100.00 | - | 1.80 | - | - | 543.01 | 90614.39 |
| 2004 | 74.71 | 65.81 | 8.90 | 86733.37 | - | - | - | - | - | - | - | - | 100.00 | - | 1.78 | - | - | 591.97 | 90655.02 |
| 2005 | 75.18 | 66.22 | 8.97 | 87616.39 | - | - | - | - | - | - | - | - | 100.00 | - | 1.76 | - | - | 584.76 | 90717.76 |
| 2006 | 75.33 | 66.35 | 8.99 | 91944.87 | - | - | - | - | - | - | - | - | 100.00 | - | 1.76 | - | - | 600.52 | 90730.66 |
| 2007 | 75.79 | 66.67 | 9.12 | 94029.61 | - | - | - | - | - | - | - | - | 100.00 | - | 1.76 | - | - | -      | 90766.34 |
| 2008 | 76.21 | 67.01 | 9.21 | 94903.19 | - | - | - | - | - | - | - | - | 100.00 | - | 1.77 | - | - | -      | 90815.07 |
| 2009 | 76.59 | 67.31 | 9.29 | 89391.21 | - | - | - | - | - | - | - | - | 100.00 | - | 1.76 | - | - | 561.26 | 90866.58 |
| 2010 | 76.97 | 67.65 | 9.32 | 88207.33 | - | - | - | - | - | - | - | - | 100.00 | - | 1.76 | - | - | 594.65 | 90932.67 |
| 2011 | 77.42 | 67.97 | 9.45 | 86001.17 | - | - | - | - | - | - | - | - | 100.00 | - | 1.59 | - | - | 614.88 | 90939.01 |
| 2012 | 77.78 | 68.27 | 9.51 | 81547.86 | - | - | - | - | - | - | - | - | 100.00 | - | 1.59 | - | - | 632.88 | 90967.23 |
| 2013 | 78.12 | 68.54 | 9.58 | 79251.78 | - | - | - | - | - | - | - | - | 100.00 | - | 1.63 | - | - | -      | 91002.58 |
| 2014 | 78.37 | 68.75 | 9.62 | -        | - | - | - | - | - | - | - | - | 100.00 | - | 1.63 | - | - | -      | 91037.19 |
| 2015 | 78.84 | 69.12 | 9.72 | -        | - | - | - | - | - | - | - | - | 100.00 | - | 1.62 | - | - | -      | 91094.29 |
| 2016 | 78.93 | 69.25 | 9.67 | -        | - | - | - | - | - | - | - | - | 100.00 | - | -    | - | - | -      | 91231.23 |
| 2017 | 81.34 | 71.38 | 9.96 | -        | - | - | - | - | - | - | - | - | -      | - | -    | - | - | -      | -        |

|        |      |       |       |      |         |       |      |        |       |       |      |      |       |      |      |       |       |         |          |
|--------|------|-------|-------|------|---------|-------|------|--------|-------|-------|------|------|-------|------|------|-------|-------|---------|----------|
| Bhutan | 1995 | 62.92 | 53.95 | 8.98 | 983.26  | 23.69 | 3.98 | 100.00 | 33.23 | 66.77 | 2.66 | 1.32 | 20.54 | 5.96 | 4.60 | 23.60 | 76.90 | 1647.89 | 88452.47 |
|        | 1996 | 63.94 | 54.78 | 9.16 | 1029.18 | 38.97 | 6.31 | 100.00 | 22.01 | 77.99 | 4.92 | 1.39 | 21.46 | 6.08 | 4.40 | 25.00 | 78.30 | 1663.93 | 88485.86 |
|        | 1997 | 64.45 | 55.23 | 9.22 | 1065.06 | 51.64 | 7.35 | 100.00 | 23.96 | 76.04 | 5.59 | 1.76 | 22.40 | 6.18 | 4.20 | 26.40 | 79.80 | 1597.10 | 88543.45 |
|        | 1998 | 65.13 | 55.79 | 9.34 | 1100.16 | 51.13 | 7.24 | 100.00 | 25.09 | 74.91 | 5.42 | 1.82 | 23.38 | 6.28 | 4.00 | 27.90 | 81.20 | 1943.09 | 88610.31 |
|        | 1999 | 66.06 | 56.54 | 9.53 | 1155.21 | 53.03 | 6.94 | 100.00 | 27.08 | 72.92 | 5.06 | 1.88 | 24.38 | 6.34 | 3.80 | 29.40 | 82.60 | 3857.57 | 88682.24 |
|        | 2000 | 65.61 | 56.22 | 9.40 | 1201.11 | 53.80 | 6.91 | 100.00 | 22.96 | 77.04 | 5.33 | 1.59 | 25.42 | 6.38 | 3.60 | 31.00 | 83.90 | 2309.76 | 88762.65 |
|        | 2001 | 67.22 | 57.52 | 9.69 | 1263.97 | 48.51 | 5.91 | 100.00 | 17.99 | 82.01 | 4.85 | 1.06 | 26.48 | 6.35 | 3.42 | 32.50 | 85.30 | 1613.47 | 88845.47 |
|        | 2002 | 67.94 | 58.13 | 9.81 | 1360.79 | 69.57 | 7.75 | 100.00 | 14.77 | 85.23 | 6.61 | 1.14 | 27.57 | 6.31 | 3.24 | 34.10 | 86.60 | 1707.60 | 88931.08 |
|        | 2003 | 68.45 | 58.58 | 9.87 | 1425.06 | 49.48 | 4.90 | 100.00 | 23.55 | 76.45 | 3.75 | 1.16 | 28.69 | 6.26 | 3.09 | 35.70 | 87.90 | 1467.57 | 89040.96 |
|        | 2004 | 69.01 | 59.06 | 9.94 | 1469.37 | 48.84 | 4.41 | 100.00 | 27.54 | 72.46 | 3.19 | 1.21 | 29.84 | 6.22 | 2.95 | 37.40 | 89.10 | 1623.24 | 89149.07 |
|        | 2005 | 69.46 | 59.51 | 9.95 | 1534.82 | 66.41 | 5.28 | 97.85  | 20.65 | 78.89 | 4.17 | 1.11 | 30.97 | 6.18 | 2.84 | 39.00 | 90.40 | 1617.86 | 89277.02 |

|      |       |       |       |         |        |      |       |       |       |      |      |       |      |      |       |        |         |          |
|------|-------|-------|-------|---------|--------|------|-------|-------|-------|------|------|-------|------|------|-------|--------|---------|----------|
| 2006 | 70.04 | 59.99 | 10.05 | 1601.92 | 70.92  | 5.27 | 97.74 | 18.15 | 81.44 | 4.29 | 0.98 | 31.71 | 6.22 | 2.73 | 40.50 | 91.50  | 1966.35 | 89393.76 |
| 2007 | 70.57 | 60.38 | 10.19 | 1848.57 | 103.18 | 5.88 | 96.97 | 87.08 | 87.08 | 5.12 | 0.76 | 32.47 | 6.25 | 2.64 | 42.10 | 92.70  | 2326.55 | 89509.73 |
| 2008 | 71.11 | 60.81 | 10.30 | 1898.05 | 119.13 | 6.58 | 97.68 | 15.10 | 84.54 | 5.56 | 1.02 | 33.24 | 6.29 | 2.55 | 43.60 | 93.80  | 1908.29 | 89640.98 |
| 2009 | 71.38 | 61.05 | 10.34 | 1986.14 | 107.71 | 6.03 | 97.74 | 18.43 | 81.15 | 4.89 | 1.14 | 34.01 | 6.34 | 2.46 | 45.20 | 94.90  | 2190.92 | 89788.32 |
| 2010 | 71.90 | 61.54 | 10.36 | 2178.92 | 113.85 | 5.17 | 94.74 | 11.49 | 87.88 | 4.54 | 0.63 | 34.79 | 6.40 | 2.38 | 46.80 | 96.00  | 3220.40 | 89939.58 |
| 2011 | 72.29 | 61.81 | 10.49 | 2310.00 | 117.61 | 4.73 | 94.74 | 11.79 | 87.56 | 4.14 | 0.59 | 35.59 | 6.49 | 2.31 | 48.30 | 97.00  | 3259.61 | 90064.55 |
| 2012 | 72.61 | 62.09 | 10.53 | 2387.01 | 90.82  | 3.70 | 94.87 | 25.69 | 72.92 | 2.70 | 1.00 | 36.37 | 6.59 | 2.24 | 49.40 | 98.00  | 3296.96 | 90199.80 |
| 2013 | 72.90 | 62.34 | 10.56 | 2399.92 | 90.30  | 3.83 | 94.54 | 25.23 | 73.31 | 2.80 | 1.02 | 37.14 | 6.69 | 2.18 | 49.70 | 99.10  | -       | 90345.46 |
| 2014 | 73.20 | 62.59 | 10.60 | 2500.26 | 88.79  | 3.57 | 94.49 | 25.33 | 73.19 | 2.62 | 0.96 | 37.90 | 6.79 | 2.13 | 50.10 | 100.00 | -       | 90490.24 |
| 2015 | 73.49 | 62.84 | 10.65 | 2628.19 | -      | -    | -     | -     | -     | -    | -    | 38.64 | 6.89 | 2.09 | 50.40 | 100.00 | -       | 90622.64 |
| 2016 | 73.79 | 63.18 | 10.61 | 2801.28 | -      | -    | -     | -     | -     | -    | -    | 39.38 | 7.01 | -    | -     | -      | -       | 90758.92 |
| 2017 | 74.05 | 64.11 | 9.94  | -       | -      | -    | -     | -     | -     | -    | -    | -     | -    | -    | -     | -      | -       | -        |

|         |      |       |       |      |         |        |      |       |       |       |      |      |       |       |      |       |       |           |          |
|---------|------|-------|-------|------|---------|--------|------|-------|-------|-------|------|------|-------|-------|------|-------|-------|-----------|----------|
| Bolivia | 1995 | 64.29 | 56.19 | 8.10 | 1504.40 | 33.10  | 3.73 | 76.79 | 33.30 | 56.64 | 2.11 | 1.62 | 59.40 | 8.67  | 4.50 | 33.20 | 73.90 | 170371.97 | 90497.42 |
|         | 1996 | 65.01 | 56.82 | 8.19 | 1539.34 | 44.36  | 4.63 | 77.93 | 27.78 | 64.35 | 2.98 | 1.65 | 59.89 | 8.74  | 4.42 | 34.10 | 74.90 | 176121.30 | 90470.72 |
|         | 1997 | 65.61 | 57.34 | 8.27 | 1584.12 | 41.99  | 4.17 | 83.87 | 30.22 | 63.97 | 2.67 | 1.50 | 60.38 | 8.81  | 4.33 | 35.00 | 75.80 | 179070.82 | 90454.81 |
|         | 1998 | 66.30 | 57.93 | 8.37 | 1631.57 | 53.99  | 5.10 | 80.18 | 31.09 | 61.22 | 3.12 | 1.98 | 60.87 | 8.86  | 4.24 | 35.90 | 76.70 | 136014.87 | 90431.53 |
|         | 1999 | 66.99 | 58.52 | 8.47 | 1607.21 | 62.74  | 6.20 | 83.83 | 35.09 | 58.14 | 3.60 | 2.59 | 61.35 | 8.91  | 4.15 | 36.80 | 77.70 | 225873.92 | 90430.22 |
|         | 2000 | 67.65 | 59.09 | 8.56 | 1616.54 | 57.09  | 5.67 | 81.57 | 34.88 | 57.24 | 3.25 | 2.42 | 61.83 | 8.94  | 4.06 | 37.70 | 78.60 | 91400.93  | 90444.18 |
|         | 2001 | 68.30 | 59.63 | 8.68 | 1613.41 | 60.48  | 6.31 | 77.91 | 31.69 | 59.32 | 3.74 | 2.57 | 62.31 | 9.01  | 3.96 | 38.60 | 79.50 | 62224.11  | 90483.92 |
|         | 2002 | 68.74 | 60.01 | 8.73 | 1623.52 | 59.65  | 6.53 | 78.85 | 29.32 | 62.82 | 4.10 | 2.43 | 62.79 | 9.06  | 3.87 | 39.50 | 80.30 | 110701.19 | 90540.01 |
|         | 2003 | 69.25 | 60.43 | 8.82 | 1637.81 | 49.38  | 5.30 | 80.23 | 27.34 | 65.92 | 3.50 | 1.81 | 63.26 | 9.12  | 3.77 | 40.40 | 81.20 | 124597.50 | 90585.75 |
|         | 2004 | 69.69 | 60.81 | 8.88 | 1676.23 | 51.77  | 5.22 | 81.25 | 26.85 | 66.96 | 3.49 | 1.72 | 63.73 | 9.19  | 3.68 | 41.30 | 82.10 | 252571.29 | 90636.05 |
|         | 2005 | 70.07 | 61.16 | 8.91 | 1720.10 | 60.16  | 5.67 | 83.77 | 26.69 | 68.14 | 3.86 | 1.81 | 64.19 | 9.30  | 3.60 | 42.20 | 82.90 | 309458.39 | 90699.76 |
|         | 2006 | 70.45 | 61.49 | 8.96 | 1771.95 | 65.05  | 5.19 | 81.46 | 26.24 | 67.79 | 3.52 | 1.67 | 64.65 | 9.43  | 3.51 | 43.10 | 83.70 | 164214.82 | 90745.93 |
|         | 2007 | 70.71 | 61.70 | 9.01 | 1821.80 | 70.05  | 4.96 | 81.55 | 68.68 | 68.68 | 3.41 | 1.55 | 65.10 | 9.58  | 3.43 | 44.00 | 84.60 | 227561.90 | 90792.82 |
|         | 2008 | 71.04 | 61.99 | 9.05 | 1901.90 | 88.31  | 5.00 | 82.98 | 26.46 | 68.11 | 3.41 | 1.60 | 65.55 | 9.74  | 3.35 | 44.90 | 85.40 | 120003.25 | 90843.96 |
|         | 2009 | 71.34 | 62.26 | 9.09 | 1933.74 | 104.13 | 5.76 | 85.27 | 26.84 | 68.52 | 3.95 | 1.81 | 65.99 | 9.89  | 3.27 | 45.80 | 86.20 | 76425.97  | 90886.84 |
|         | 2010 | 71.63 | 62.55 | 9.09 | 1981.16 | 109.76 | 5.44 | 85.31 | 27.90 | 67.30 | 3.66 | 1.78 | 66.43 | 10.03 | 3.20 | 46.70 | 86.90 | 102900.52 | 90940.82 |
|         | 2011 | 71.91 | 62.75 | 9.15 | 2051.15 | 132.83 | 5.49 | 79.76 | 25.27 | 68.32 | 3.75 | 1.74 | 66.86 | 10.14 | 3.13 | 47.50 | 87.70 | 620981.96 | 90957.85 |



|          |      |       |       |       |         |        |      |       |       |       |      |      |       |      |      |       |       |            |          |
|----------|------|-------|-------|-------|---------|--------|------|-------|-------|-------|------|------|-------|------|------|-------|-------|------------|----------|
| Botswana | 1995 | 56.19 | 49.22 | 6.98  | 4237.57 | 125.97 | 4.08 | 37.73 | 18.04 | 52.18 | 2.13 | 1.95 | 48.98 | 4.85 | 3.95 | 46.10 | 93.70 | 12153.00   | 87685.80 |
|          | 1996 | 53.87 | 47.29 | 6.58  | 4386.85 | 125.67 | 4.04 | 34.28 | 16.25 | 52.58 | 2.12 | 1.91 | 49.83 | 4.87 | 3.84 | 47.20 | 93.90 | 10207.06   | 87702.36 |
|          | 1997 | 51.67 | 45.44 | 6.23  | 4641.81 | 138.61 | 4.30 | 34.50 | 14.98 | 56.57 | 2.43 | 1.87 | 50.68 | 4.90 | 3.72 | 48.30 | 94.10 | 10100.56   | 87740.31 |
|          | 1998 | 49.63 | 43.70 | 5.94  | 4585.74 | 127.47 | 3.86 | 36.51 | 15.88 | 56.51 | 2.18 | 1.68 | 51.53 | 4.92 | 3.61 | 49.40 | 94.30 | 34293.87   | 87790.41 |
|          | 1999 | 47.94 | 42.20 | 5.74  | 4939.60 | 132.11 | 3.74 | 36.16 | 15.26 | 57.79 | 2.16 | 1.58 | 52.37 | 4.94 | 3.49 | 50.50 | 94.50 | 34724.21   | 87817.32 |
|          | 2000 | 46.56 | 40.92 | 5.64  | 4954.77 | 154.79 | 4.64 | 36.70 | 13.78 | 62.45 | 2.90 | 1.74 | 53.22 | 4.97 | 3.39 | 51.60 | 94.70 | 39682.50   | 87878.44 |
|          | 2001 | 45.68 | 40.21 | 5.47  | 4891.91 | 178.45 | 5.73 | 37.83 | 10.45 | 72.37 | 4.15 | 1.58 | 54.06 | 5.05 | 3.29 | 52.70 | 94.90 | 54348.93   | 87899.24 |
|          | 2002 | 45.15 | 39.79 | 5.35  | 5115.90 | 197.06 | 6.47 | 36.62 | 8.93  | 75.61 | 4.89 | 1.58 | 54.37 | 5.12 | 3.19 | 53.70 | 95.00 | 51450.30   | 87915.87 |
|          | 2003 | 45.23 | 39.85 | 5.39  | 5280.22 | 192.84 | 4.65 | 30.80 | 11.12 | 63.90 | 2.97 | 1.68 | 54.61 | 5.18 | 3.11 | 54.50 | 95.10 | 17482.99   | 87936.79 |
|          | 2004 | 46.06 | 40.47 | 5.58  | 5349.00 | 271.23 | 5.56 | 26.38 | 7.93  | 69.95 | 3.89 | 1.67 | 54.84 | 5.24 | 3.04 | 55.40 | 95.20 | 23886.71   | 87953.82 |
|          | 2005 | 47.70 | 41.71 | 5.99  | 5512.81 | 299.63 | 5.62 | 22.93 | 6.25  | 72.74 | 4.09 | 1.53 | 55.07 | 5.28 | 2.99 | 56.30 | 95.30 | 24188.46   | 87980.31 |
|          | 2006 | 49.46 | 43.26 | 6.20  | 5883.90 | 263.34 | 4.93 | 20.01 | 5.89  | 70.58 | 3.48 | 1.45 | 55.31 | 5.35 | 2.95 | 57.20 | 95.40 | 43484.66   | 88029.98 |
|          | 2007 | 51.07 | 44.66 | 6.41  | 6270.47 | 267.07 | 4.71 | 17.55 | 70.35 | 70.35 | 3.32 | 1.40 | 55.54 | 5.40 | 2.92 | 58.00 | 95.50 | 26082.88   | 88080.32 |
|          | 2008 | 52.71 | 46.05 | 6.66  | 6552.78 | 313.44 | 5.55 | 12.73 | 3.72  | 70.78 | 3.93 | 1.62 | 55.77 | 5.46 | 2.90 | 58.90 | 95.70 | 73051.13   | 88123.19 |
|          | 2009 | 54.78 | 47.76 | 7.03  | 5948.85 | 321.66 | 6.39 | 13.48 | 4.00  | 70.36 | 4.49 | 1.89 | 56.00 | 5.50 | 2.89 | 59.80 | 95.80 | 22941.97   | 88171.64 |
|          | 2010 | 56.84 | 49.43 | 7.41  | 6346.16 | 378.78 | 5.64 | 11.94 | 4.44  | 62.82 | 3.54 | 2.10 | 56.24 | 5.53 | 2.88 | 60.60 | 95.90 | 81652.26   | 88234.97 |
|          | 2011 | 58.69 | 51.12 | 7.56  | 6610.33 | 384.13 | 5.25 | 12.66 | 4.85  | 61.65 | 3.24 | 2.01 | 56.47 | 5.56 | 2.88 | 61.50 | 96.00 | 81891.04   | 88262.96 |
|          | 2012 | 60.24 | 52.50 | 7.73  | 6779.39 | 427.52 | 6.27 | 12.66 | 4.68  | 63.06 | 3.96 | 2.32 | 56.70 | 5.59 | 2.86 | 62.40 | 96.10 | 82110.28   | 88277.94 |
|          | 2013 | 62.08 | 54.05 | 8.03  | 7409.42 | 396.60 | 5.84 | 12.66 | 5.06  | 60.07 | 3.51 | 2.33 | 56.94 | 5.62 | 2.84 | 63.30 | 96.20 | -          | 88319.14 |
|          | 2014 | 63.38 | 55.12 | 8.26  | 7574.28 | 385.31 | 5.41 | 12.66 | 5.19  | 59.01 | 3.19 | 2.22 | 57.19 | 5.68 | 2.81 | 63.30 | 96.20 | -          | 88359.81 |
|          | 2015 | 64.38 | 55.92 | 8.46  | 7308.61 | -      | -    | -     | -     | -     | -    | -    | 57.44 | 5.78 | 2.77 | 63.40 | 96.20 | -          | 88402.10 |
|          | 2016 | 65.23 | 56.60 | 8.63  | 7483.17 | -      | -    | -     | -     | -     | -    | -    | 57.71 | 5.92 | -    | -     | -     | -          | 88432.21 |
|          | 2017 | 69.07 | 58.89 | 10.18 | -       | -      | -    | -     | -     | -     | -    | -    | -     | -    | -    | -     | -     | -          | -        |
| Brazil   | 1995 | 69.66 | 60.88 | 8.78  | 8547.94 | 314.30 | 6.51 | 67.98 | 38.74 | 43.01 | 2.80 | 3.71 | 77.61 | 7.19 | 2.59 | 70.80 | 91.10 | 1574445.63 | 90304.13 |
|          | 1996 | 69.96 | 61.13 | 8.84  | 8598.01 | 346.30 | 6.71 | 68.64 | 41.00 | 40.26 | 2.70 | 4.01 | 78.30 | 7.33 | 2.54 | 71.50 | 91.60 | 1613760.44 | 90410.47 |
|          | 1997 | 70.34 | 61.42 | 8.93  | 8750.27 | 353.30 | 6.69 | 66.89 | 38.16 | 42.95 | 2.87 | 3.82 | 79.05 | 7.44 | 2.48 | 72.40 | 92.10 | 1647413.79 | 90519.67 |
|          | 1998 | 70.67 | 61.67 | 9.01  | 8644.42 | 333.47 | 6.56 | 66.89 | 38.37 | 42.64 | 2.80 | 3.76 | 79.78 | 7.55 | 2.43 | 73.10 | 92.50 | 2263725.63 | 90631.74 |
|          | 1999 | 70.98 | 61.89 | 9.09  | 8554.83 | 240.30 | 6.91 | 67.09 | 38.42 | 42.73 | 2.95 | 3.96 | 80.50 | 7.67 | 2.37 | 73.90 | 93.00 | 1595863.26 | 90744.40 |
|          | 2000 | 71.36 | 62.17 | 9.19  | 8778.19 | 262.76 | 7.03 | 63.58 | 37.95 | 40.30 | 2.83 | 4.20 | 81.19 | 7.81 | 2.30 | 74.70 | 93.50 | 1222630.43 | 90866.17 |

|               |             |              |              |             |                 |               |             |              |              |              |             |             |              |             |             |          |            |                 |                 |
|---------------|-------------|--------------|--------------|-------------|-----------------|---------------|-------------|--------------|--------------|--------------|-------------|-------------|--------------|-------------|-------------|----------|------------|-----------------|-----------------|
| 2001          | 71.76       | 62.49        | 9.27         | 8776.86     | 225.78          | 7.19          | 62.59       | 36.12        | 42.29        | 3.04         | 4.15        | 81.55       | 8.01         | 2.23        | 75.30       | 93.80    | 1277451.88 | 90926.41        |                 |
| 2002          | 72.06       | 62.73        | 9.33         | 8924.33     | 201.09          | 7.13          | 62.52       | 34.61        | 44.64        | 3.18         | 3.95        | 81.88       | 8.23         | 2.16        | 75.90       | 94.20    | 1591827.05 | 90990.89        |                 |
| 2003          | 72.33       | 62.94        | 9.39         | 8910.86     | 211.33          | 6.94          | 62.61       | 34.83        | 44.37        | 3.08         | 3.86        | 82.20       | 8.45         | 2.10        | 76.50       | 94.50    | 1624554.70 | 91055.19        |                 |
| 2004          | 72.62       | 63.16        | 9.45         | 9309.01     | 254.29          | 7.07          | 62.64       | 33.19        | 47.02        | 3.32         | 3.74        | 82.52       | 8.66         | 2.03        | 77.10       | 94.90    | 1967427.39 | 91115.96        |                 |
| 2005          | 72.93       | 63.42        | 9.51         | 9495.10     | 391.29          | 8.27          | 62.77       | 36.71        | 41.51        | 3.43         | 4.84        | 82.83       | 8.86         | 1.98        | 77.70       | 95.20    | 2386439.68 | 91179.17        |                 |
| 2006          | 73.20       | 63.67        | 9.53         | 9761.88     | 485.39          | 8.36          | 61.82       | 35.98        | 41.80        | 3.49         | 4.86        | 83.14       | 9.06         | 1.93        | 78.20       | 95.60    | 1621079.23 | 91232.56        |                 |
| 2007          | 73.46       | 63.88        | 9.58         | 10245.23    | 599.60          | 8.28          | 58.46       | 41.73        | 41.73        | 3.46         | 4.83        | 83.45       | 9.24         | 1.88        | 78.80       | 95.90    | 2703498.56 | 91287.96        |                 |
| 2008          | 73.72       | 64.11        | 9.61         | 10658.23    | 716.76          | 8.24          | 56.04       | 31.47        | 43.84        | 3.61         | 4.63        | 83.75       | 9.42         | 1.85        | 79.40       | 96.20    | 1532859.83 | 91347.95        |                 |
| 2009          | 73.94       | 64.30        | 9.64         | 10540.11    | 731.92          | 8.65          | 57.19       | 31.79        | 44.41        | 3.84         | 4.81        | 84.04       | 9.62         | 1.82        | 79.90       | 96.50    | 1211969.41 | 91410.80        |                 |
| 2010          | 74.15       | 64.52        | 9.63         | 11224.15    | 919.67          | 8.27          | 50.40       | 27.32        | 45.80        | 3.79         | 4.48        | 84.34       | 9.85         | 1.81        | 80.50       | 96.90    | 2902242.62 | 91479.46        |                 |
| 2011          | 74.38       | 64.69        | 9.69         | 11559.21    | 1055.14         | 8.09          | 48.96       | 26.85        | 45.17        | 3.65         | 4.44        | 84.62       | 10.13        | 1.79        | 81.10       | 97.20    | 2953040.52 | 91584.35        |                 |
| 2012          | 74.64       | 64.90        | 9.73         | 11671.18    | 984.92          | 8.26          | 48.31       | 26.90        | 44.32        | 3.66         | 4.60        | 84.90       | 10.42        | 1.78        | 81.60       | 97.50    | 2989417.96 | 91697.40        |                 |
| 2013          | 74.84       | 65.08        | 9.76         | 11912.15    | 993.46          | 8.48          | 46.93       | 25.76        | 45.12        | 3.83         | 4.66        | 85.17       | 10.74        | 1.77        | 82.10       | 97.80    | -          | 91814.44        |                 |
| 2014          | 75.01       | 65.22        | 9.79         | 11866.39    | 947.43          | 8.32          | 47.20       | 25.47        | 46.04        | 3.83         | 4.49        | 85.43       | 11.08        | 1.75        | 82.70       | 98.10    | -          | 91944.66        |                 |
| 2015          | 75.14       | 65.34        | 9.80         | 11322.15    | -               | -             | -           | -            | -            | -            | -           | 85.69       | 11.45        | 1.74        | 82.80       | 98.10    | -          | 92087.51        |                 |
| 2016          | 75.24       | 65.48        | 9.76         | 10826.27    | -               | -             | -           | -            | -            | -            | -           | 85.93       | 11.85        | -           | -           | -        | -          | 92229.31        |                 |
| 2017          | 75.51       | 65.40        | 10.11        | -           | -               | -             | -           | -            | -            | -            | -           | -           | -            | -           | -           | -        | -          | -               |                 |
| <b>Brunei</b> | <b>1995</b> | <b>74.21</b> | <b>65.07</b> | <b>9.14</b> | <b>37703.79</b> | <b>475.80</b> | <b>2.97</b> | <b>98.31</b> | <b>22.25</b> | <b>77.37</b> | <b>2.29</b> | <b>0.67</b> | <b>68.64</b> | <b>4.14</b> | <b>2.80</b> | <b>-</b> | <b>-</b>   | <b>21264.68</b> | <b>83178.03</b> |
|               | 1996        | 74.48        | 65.28        | 9.20        | 37833.36        | 629.83        | 3.72        | 98.39        | 18.69        | 81.00        | 3.02        | 0.71        | 69.16        | 4.02        | 2.69        | -        | -          | 18153.20        | 83268.90        |
|               | 1997        | 74.92        | 65.64        | 9.28        | 36400.04        | 626.75        | 3.74        | 98.44        | 18.93        | 80.77        | 3.02        | 0.72        | 69.67        | 3.91        | 2.56        | -        | -          | 18632.40        | 83361.29        |
|               | 1998        | 75.34        | 65.99        | 9.35        | 35382.14        | 569.42        | 4.46        | 98.33        | 16.27        | 83.45        | 3.72        | 0.74        | 70.17        | 3.80        | 2.44        | -        | -          | 17789.18        | 83497.89        |
|               | 1999        | 75.68        | 66.27        | 9.41        | 35672.34        | 542.03        | 3.82        | 98.28        | 16.28        | 83.44        | 3.18        | 0.63        | 70.67        | 3.69        | 2.33        | -        | -          | 9479.82         | 83635.28        |
|               | 2000        | 75.83        | 66.42        | 9.41        | 35923.40        | 554.45        | 3.05        | 98.16        | 14.64        | 85.09        | 2.60        | 0.46        | 71.16        | 3.58        | 2.22        | -        | -          | 9649.40         | 83799.65        |
|               | 2001        | 76.10        | 66.63        | 9.47        | 36162.98        | 508.30        | 3.06        | 98.32        | 15.50        | 84.23        | 2.58        | 0.48        | 71.65        | 3.74        | 2.12        | -        | -          | 9865.14         | 83932.60        |
|               | 2002        | 76.33        | 66.83        | 9.49        | 36832.27        | 516.68        | 3.04        | 98.30        | 15.18        | 84.56        | 2.57        | 0.47        | 72.14        | 3.88        | 2.03        | -        | -          | 9840.81         | 84102.78        |
|               | 2003        | 76.50        | 66.99        | 9.51        | 37202.36        | 579.79        | 3.09        | 98.90        | 15.91        | 83.91        | 2.59        | 0.50        | 72.61        | 4.01        | 1.95        | -        | -          | 10762.04        | 84295.64        |
|               | 2004        | 76.61        | 67.09        | 9.52        | 36752.05        | 665.22        | 3.01        | 98.90        | 15.91        | 83.92        | 2.52        | 0.48        | 73.06        | 4.14        | 1.89        | -        | -          | 10320.10        | 84490.76        |
|               | 2005        | 76.64        | 67.16        | 9.48        | 36325.12        | 691.29        | 2.62        | 98.90        | 15.40        | 84.43        | 2.22        | 0.41        | 73.50        | 4.30        | 1.85        | -        | -          | 10968.96        | 84708.93        |
|               | 2006        | 76.63        | 67.17        | 9.46        | 37401.05        | 699.00        | 2.24        | 98.74        | 13.84        | 85.99        | 1.93        | 0.31        | 73.93        | 4.46        | 1.82        | -        | -          | 13195.22        | 84851.38        |

|      |       |       |      |          |         |      |       |       |       |      |      |       |      |      |   |   |          |          |
|------|-------|-------|------|----------|---------|------|-------|-------|-------|------|------|-------|------|------|---|---|----------|----------|
| 2007 | 76.62 | 67.14 | 9.48 | 36997.81 | 758.10  | 2.32 | 98.55 | 87.96 | 87.96 | 2.04 | 0.28 | 74.35 | 4.60 | 1.81 | - | - | 12998.23 | 84997.05 |
| 2008 | 76.72 | 67.24 | 9.49 | 35860.39 | 842.72  | 2.23 | 98.34 | 9.43  | 90.42 | 2.02 | 0.21 | 74.75 | 4.70 | 1.81 | - | - | 13738.06 | 85138.30 |
| 2009 | 76.79 | 67.30 | 9.49 | 34812.71 | 789.85  | 2.85 | 98.10 | 8.84  | 90.99 | 2.59 | 0.26 | 75.13 | 4.78 | 1.82 | - | - | 13549.80 | 85286.23 |
| 2010 | 76.95 | 67.48 | 9.47 | 35268.10 | 859.66  | 2.73 | 97.83 | 7.63  | 92.20 | 2.52 | 0.21 | 75.51 | 4.82 | 1.84 | - | - | 14123.60 | 85414.96 |
| 2011 | 76.84 | 67.36 | 9.47 | 36092.10 | 938.48  | 2.25 | 97.83 | 7.80  | 92.02 | 2.07 | 0.18 | 75.87 | 4.92 | 1.86 | - | - | 14494.49 | 85584.85 |
| 2012 | 76.75 | 67.31 | 9.45 | 35899.04 | 961.89  | 2.30 | 97.83 | 8.00  | 91.82 | 2.11 | 0.19 | 76.22 | 5.04 | 1.87 | - | - | 14828.97 | 85763.36 |
| 2013 | 76.79 | 67.34 | 9.45 | 34618.97 | 1022.87 | 2.61 | 97.83 | 7.68  | 92.15 | 2.41 | 0.21 | 76.56 | 5.20 | 1.88 | - | - | -        | 85951.60 |
| 2014 | 76.75 | 67.32 | 9.43 | 33313.83 | 957.61  | 2.65 | 97.83 | 6.01  | 93.86 | 2.49 | 0.16 | 76.89 | 5.40 | 1.89 | - | - | -        | 86140.86 |
| 2015 | 76.79 | 67.36 | 9.44 | 32661.86 | -       | -    | -     | -     | -     | -    | -    | 77.20 | 5.67 | 1.88 | - | - | -        | 86334.40 |
| 2016 | 76.88 | 67.48 | 9.40 | 31430.96 | -       | -    | -     | -     | -     | -    | -    | 77.51 | 5.98 | -    | - | - | -        | 86514.55 |
| 2017 | 75.35 | 66.17 | 9.18 | -        | -       | -    | -     | -     | -     | -    | -    | -     | -    | -    | - | - | -        | -        |

|          |      |       |       |      |         |        |      |        |       |       |      |      |       |       |      |       |       |          |          |
|----------|------|-------|-------|------|---------|--------|------|--------|-------|-------|------|------|-------|-------|------|-------|-------|----------|----------|
| Bulgaria | 1995 | 70.87 | 62.14 | 8.72 | 3781.90 | 81.38  | 4.75 | 100.00 | 26.04 | 73.96 | 3.52 | 1.24 | 67.78 | 22.55 | 1.23 | 85.50 | 99.80 | 81769.92 | 93532.67 |
|          | 1996 | 70.74 | 62.08 | 8.66 | 3862.28 | 55.96  | 4.57 | 100.00 | 30.40 | 69.60 | 3.18 | 1.39 | 68.01 | 23.06 | 1.23 | 85.50 | 99.80 | 82852.67 | 93616.74 |
|          | 1997 | 70.51 | 61.93 | 8.58 | 3843.12 | 64.20  | 4.74 | 100.00 | 28.34 | 71.66 | 3.40 | 1.34 | 68.23 | 23.55 | 1.09 | 85.50 | 99.80 | 78532.98 | 93685.60 |
|          | 1998 | 71.01 | 62.38 | 8.64 | 4004.26 | 82.66  | 4.67 | 100.00 | 30.10 | 69.88 | 3.26 | 1.41 | 68.45 | 23.98 | 1.11 | 85.60 | 99.80 | 71902.28 | 93732.15 |
|          | 1999 | 71.42 | 62.72 | 8.70 | 3800.87 | 96.16  | 5.86 | 100.00 | 33.67 | 66.33 | 3.88 | 1.97 | 68.68 | 24.31 | 1.23 | 85.60 | 99.80 | 65864.38 | 93753.27 |
|          | 2000 | 71.67 | 62.96 | 8.71 | 4011.10 | 97.88  | 6.07 | 100.00 | 39.07 | 60.93 | 3.70 | 2.37 | 68.90 | 24.49 | 1.26 | 85.60 | 99.70 | 66195.09 | 93785.94 |
|          | 2001 | 71.91 | 63.15 | 8.76 | 4265.56 | 126.03 | 7.23 | 99.94  | 41.58 | 58.39 | 4.22 | 3.01 | 69.17 | 24.79 | 1.21 | 85.70 | 99.70 | 68733.68 | 93804.41 |
|          | 2002 | 72.17 | 63.37 | 8.81 | 4621.50 | 155.17 | 7.41 | 98.46  | 38.15 | 61.26 | 4.54 | 2.87 | 69.52 | 24.97 | 1.23 | 85.80 | 99.70 | 63711.02 | 93835.34 |
|          | 2003 | 72.38 | 63.53 | 8.85 | 4894.78 | 201.88 | 7.43 | 97.61  | 36.98 | 62.11 | 4.62 | 2.82 | 69.88 | 25.06 | 1.26 | 85.80 | 99.70 | 70024.03 | 93857.41 |
|          | 2004 | 72.47 | 63.61 | 8.87 | 5255.18 | 239.47 | 7.09 | 97.38  | 38.22 | 60.76 | 4.31 | 2.78 | 70.23 | 25.10 | 1.33 | 85.80 | 99.60 | 68865.66 | 93874.92 |
|          | 2005 | 72.57 | 63.71 | 8.86 | 5678.05 | 274.97 | 7.08 | 96.95  | 37.89 | 60.92 | 4.31 | 2.77 | 70.58 | 25.13 | 1.37 | 85.90 | 99.60 | 68542.77 | 93888.81 |
|          | 2006 | 72.71 | 63.82 | 8.88 | 6107.71 | 300.39 | 6.67 | 97.09  | 41.79 | 56.95 | 3.80 | 2.87 | 70.93 | 25.33 | 1.44 | 85.90 | 99.60 | 69900.82 | 93856.06 |
|          | 2007 | 72.98 | 64.01 | 8.97 | 6625.03 | 379.48 | 6.41 | 97.13  | 58.20 | 58.20 | 3.73 | 2.68 | 71.28 | 25.50 | 1.49 | 85.90 | 99.60 | 72526.72 | 93819.48 |
|          | 2008 | 73.27 | 64.23 | 9.05 | 6914.40 | 483.39 | 6.61 | 97.35  | 40.37 | 58.54 | 3.87 | 2.74 | 71.62 | 25.69 | 1.56 | 85.90 | 99.60 | 71720.34 | 93790.40 |
|          | 2009 | 73.53 | 64.41 | 9.12 | 6709.53 | 471.57 | 6.78 | 97.14  | 43.37 | 55.35 | 3.75 | 3.03 | 71.96 | 25.98 | 1.66 | 85.90 | 99.50 | 65132.86 | 93764.26 |
|          | 2010 | 73.80 | 64.63 | 9.17 | 6843.26 | 488.21 | 7.24 | 96.77  | 42.88 | 55.69 | 4.03 | 3.21 | 72.30 | 26.41 | 1.57 | 85.90 | 99.50 | 67945.31 | 93773.26 |
|          | 2011 | 74.25 | 64.95 | 9.31 | 7019.18 | 532.50 | 6.88 | 96.77  | 43.91 | 54.62 | 3.76 | 3.12 | 72.64 | 27.10 | 1.51 | 85.90 | 99.50 | 72946.62 | 93768.96 |
|          | 2012 | 74.63 | 65.24 | 9.40 | 7062.14 | 519.48 | 7.11 | 97.28  | 42.52 | 56.29 | 4.00 | 3.11 | 72.97 | 27.91 | 1.50 | 86.00 | 99.50 | 67942.70 | 93779.85 |

|                |      |       |       |       |         |        |      |       |       |       |      |      |       |       |      |       |       |          |          |
|----------------|------|-------|-------|-------|---------|--------|------|-------|-------|-------|------|------|-------|-------|------|-------|-------|----------|----------|
|                | 2013 | 74.85 | 65.41 | 9.45  | 7162.99 | 606.03 | 7.93 | 97.47 | 46.80 | 51.99 | 4.12 | 3.81 | 73.30 | 28.80 | 1.48 | 86.00 | 99.50 | -        | 93807.04 |
|                | 2014 | 74.93 | 65.46 | 9.47  | 7299.55 | 661.85 | 8.44 | 97.28 | 44.19 | 54.57 | 4.61 | 3.84 | 73.63 | 29.67 | 1.53 | 86.00 | 99.40 | -        | 93830.08 |
|                | 2015 | 74.98 | 65.50 | 9.48  | 7612.02 | -      | -    | -     | -     | -     | -    | -    | 73.95 | 30.46 | 1.53 | 86.00 | 99.40 | -        | 93864.02 |
|                | 2016 | 75.03 | 65.60 | 9.43  | 7967.71 | -      | -    | -     | -     | -     | -    | -    | 74.27 | 31.29 | -    | -     | -     | -        | 93907.55 |
|                | 2017 | 74.88 | 64.87 | 10.01 | -       | -      | -    | -     | -     | -     | -    | -    | -     | -     | -    | -     | -     | -        | -        |
| <b>Burkina</b> | 1995 | 50.74 | 43.36 | 7.38  | 361.12  | 11.58  | 4.91 | 94.33 | 58.47 | 38.02 | 1.87 | 3.04 | 15.13 | 6.12  | 6.84 | 9.20  | 50.70 | 14072.24 | 92488.55 |
|                | 1996 | 50.45 | 43.17 | 7.27  | 389.97  | 12.81  | 5.14 | 94.38 | 58.84 | 37.66 | 1.93 | 3.20 | 15.41 | 6.03  | 6.80 | 9.60  | 52.50 | 14494.96 | 92469.07 |
|                | 1997 | 50.92 | 43.61 | 7.31  | 403.22  | 11.77  | 5.13 | 94.33 | 56.30 | 40.32 | 2.07 | 3.06 | 15.88 | 5.91  | 6.75 | 10.00 | 54.30 | 15472.87 | 92465.82 |
|                | 1998 | 51.40 | 44.06 | 7.35  | 420.72  | 13.45  | 5.26 | 94.38 | 57.40 | 39.19 | 2.06 | 3.20 | 16.51 | 5.77  | 6.70 | 10.50 | 56.20 | 45357.72 | 92447.24 |
|                | 1999 | 51.85 | 44.46 | 7.39  | 439.30  | 13.93  | 5.27 | 94.34 | 55.09 | 41.60 | 2.19 | 3.08 | 17.17 | 5.63  | 6.65 | 11.00 | 58.00 | 41428.10 | 92428.04 |
|                | 2000 | 52.22 | 44.79 | 7.43  | 434.76  | 11.48  | 5.06 | 94.33 | 56.72 | 39.87 | 2.02 | 3.04 | 17.84 | 5.48  | 6.59 | 11.60 | 59.90 | 46470.10 | 92416.07 |
|                | 2001 | 52.69 | 45.38 | 7.31  | 450.45  | 11.51  | 4.85 | 94.32 | 58.70 | 37.77 | 1.83 | 3.02 | 18.54 | 5.41  | 6.53 | 12.10 | 61.80 | 41227.96 | 92397.35 |
|                | 2002 | 53.17 | 45.82 | 7.36  | 456.73  | 13.73  | 5.26 | 94.32 | 53.86 | 42.89 | 2.26 | 3.00 | 19.26 | 5.33  | 6.47 | 12.70 | 63.60 | 50062.48 | 92388.28 |
|                | 2003 | 53.85 | 46.41 | 7.44  | 478.30  | 18.64  | 5.61 | 92.22 | 49.41 | 46.42 | 2.60 | 3.01 | 20.00 | 5.23  | 6.40 | 13.20 | 65.40 | 43713.29 | 92377.06 |
|                | 2004 | 54.42 | 46.91 | 7.51  | 485.31  | 23.96  | 6.45 | 95.18 | 44.08 | 53.68 | 3.46 | 2.99 | 20.76 | 5.14  | 6.34 | 13.80 | 67.30 | 43284.41 | 92384.39 |
|                | 2005 | 55.10 | 47.50 | 7.60  | 511.97  | 27.98  | 6.87 | 94.25 | 38.13 | 59.54 | 4.09 | 2.78 | 21.54 | 5.04  | 6.27 | 14.40 | 69.10 | 47809.70 | 92403.61 |
|                | 2006 | 55.64 | 48.05 | 7.59  | 527.96  | 27.65  | 6.58 | 91.28 | 39.37 | 56.86 | 3.74 | 2.84 | 22.34 | 5.01  | 6.19 | 15.00 | 71.00 | 41364.17 | 92373.64 |
|                | 2007 | 56.21 | 48.60 | 7.62  | 541.27  | 31.47  | 6.63 | 93.73 | 60.27 | 60.27 | 4.00 | 2.63 | 23.16 | 4.98  | 6.12 | 15.60 | 72.80 | 43631.84 | 92350.34 |
|                | 2008 | 56.88 | 49.22 | 7.66  | 563.45  | 38.51  | 6.77 | 92.95 | 38.06 | 59.05 | 4.00 | 2.77 | 23.99 | 4.93  | 6.04 | 16.20 | 74.60 | 40706.30 | 92335.59 |
|                | 2009 | 57.43 | 49.73 | 7.70  | 562.84  | 40.87  | 7.41 | 73.97 | 37.43 | 49.40 | 3.66 | 3.75 | 24.83 | 4.88  | 5.95 | 16.80 | 76.40 | 43473.10 | 92315.90 |
|                | 2010 | 57.91 | 50.19 | 7.72  | 575.45  | 41.19  | 7.17 | 73.77 | 32.91 | 55.39 | 3.97 | 3.20 | 25.67 | 4.81  | 5.87 | 17.40 | 78.20 | 43405.91 | 92317.87 |
|                | 2011 | 58.45 | 50.75 | 7.70  | 595.39  | 34.42  | 5.17 | 99.85 | 42.77 | 57.17 | 2.96 | 2.21 | 26.51 | 4.79  | 5.78 | 18.00 | 80.00 | 43660.15 | 92304.75 |
|                | 2012 | 58.90 | 51.19 | 7.71  | 615.10  | 35.85  | 5.33 | 86.29 | 38.01 | 55.95 | 2.98 | 2.35 | 27.35 | 4.76  | 5.69 | 18.60 | 81.70 | 43910.40 | 92314.77 |
|                | 2013 | 59.38 | 51.64 | 7.74  | 631.61  | 42.21  | 5.91 | 82.11 | 33.65 | 59.02 | 3.49 | 2.42 | 28.19 | 4.72  | 5.61 | 19.00 | 81.90 | -        | 92323.87 |
|                | 2014 | 59.85 | 52.06 | 7.78  | 639.71  | 35.20  | 4.96 | 81.94 | 39.09 | 52.30 | 2.59 | 2.37 | 29.02 | 4.68  | 5.52 | 19.40 | 82.10 | -        | 92342.30 |
|                | 2015 | 60.35 | 52.51 | 7.83  | 645.37  | -      | -    | -     | -     | -     | -    | -    | 29.86 | 4.63  | 5.44 | 19.70 | 82.30 | -        | 92356.15 |
|                | 2016 | 60.79 | 52.93 | 7.86  | 663.91  | -      | -    | -     | -     | -     | -    | -    | 30.69 | 4.62  | -    | -     | -     | -        | 92363.84 |
|                | 2017 | 61.68 | 53.43 | 8.24  | -       | -      | -    | -     | -     | -     | -    | -    | -     | -     | -    | -     | -     | -        | -        |
| <b>Burundi</b> | 1995 | 46.96 | 41.57 | 5.38  | 263.27  | 8.61   | 4.37 | 75.17 | 52.04 | 30.78 | 1.35 | 3.03 | 7.21  | 6.21  | 7.29 | 43.00 | 70.30 | 2998.94  | 88678.09 |

|      |       |       |      |        |       |       |       |       |       |      |      |       |      |      |       |       |         |          |
|------|-------|-------|------|--------|-------|-------|-------|-------|-------|------|------|-------|------|------|-------|-------|---------|----------|
| 1996 | 46.58 | 41.29 | 5.29 | 239.04 | 7.57  | 4.50  | 68.21 | 45.54 | 33.22 | 1.49 | 3.00 | 7.41  | 6.30 | 7.24 | 43.30 | 70.60 | 3046.74 | 88691.55 |
| 1997 | 46.99 | 41.64 | 5.35 | 232.51 | 7.65  | 4.11  | 68.90 | 49.96 | 27.49 | 1.13 | 2.98 | 7.62  | 6.37 | 7.18 | 43.50 | 70.90 | 3059.80 | 88707.88 |
| 1998 | 47.27 | 41.87 | 5.40 | 240.63 | 7.58  | 4.50  | 68.62 | 49.60 | 27.73 | 1.25 | 3.25 | 7.83  | 6.41 | 7.13 | 43.80 | 71.20 | 6229.07 | 88756.67 |
| 1999 | 47.77 | 42.29 | 5.49 | 234.68 | 6.58  | 4.39  | 68.48 | 49.17 | 28.20 | 1.24 | 3.15 | 8.04  | 6.41 | 7.07 | 44.00 | 71.50 | 2767.73 | 88806.56 |
| 2000 | 47.89 | 42.36 | 5.53 | 228.25 | 6.40  | 4.98  | 72.70 | 52.19 | 28.21 | 1.40 | 3.57 | 8.25  | 6.37 | 7.01 | 44.30 | 71.80 | 3398.87 | 88867.05 |
| 2001 | 49.01 | 43.33 | 5.68 | 227.43 | 6.26  | 4.96  | 74.02 | 49.63 | 32.95 | 1.63 | 3.33 | 8.46  | 6.23 | 6.95 | 44.60 | 72.10 | 3390.84 | 88911.29 |
| 2002 | 49.85 | 44.06 | 5.78 | 231.00 | 5.94  | 5.15  | 75.84 | 52.95 | 30.18 | 1.56 | 3.60 | 8.68  | 6.07 | 6.89 | 44.80 | 72.40 | 5029.51 | 88949.82 |
| 2003 | 50.84 | 44.93 | 5.91 | 221.23 | 5.56  | 5.25  | 75.06 | 55.82 | 25.63 | 1.35 | 3.90 | 8.91  | 5.91 | 6.82 | 45.10 | 72.70 | 5258.75 | 88986.72 |
| 2004 | 51.97 | 45.92 | 6.06 | 224.52 | 8.48  | 7.10  | 67.72 | 43.46 | 35.83 | 2.54 | 4.56 | 9.14  | 5.75 | 6.76 | 45.30 | 73.00 | 5370.44 | 88983.70 |
| 2005 | 53.09 | 46.90 | 6.19 | 219.19 | 13.85 | 9.84  | 69.87 | 49.01 | 29.86 | 2.94 | 6.90 | 9.38  | 5.59 | 6.69 | 45.60 | 73.30 | 5302.31 | 88993.71 |
| 2006 | 54.30 | 47.99 | 6.30 | 223.40 | 17.80 | 11.49 | 69.18 | 47.94 | 30.71 | 3.53 | 7.96 | 9.62  | 5.46 | 6.62 | 45.90 | 73.50 | 5553.35 | 88955.20 |
| 2007 | 55.40 | 48.95 | 6.45 | 226.30 | 15.97 | 10.03 | 60.49 | 37.70 | 37.70 | 3.78 | 6.25 | 9.86  | 5.34 | 6.53 | 46.10 | 73.80 | 5477.68 | 88914.99 |
| 2008 | 56.30 | 49.76 | 6.54 | 229.83 | 14.36 | 7.86  | 65.36 | 37.46 | 42.69 | 3.36 | 4.50 | 10.12 | 5.22 | 6.45 | 46.40 | 74.10 | 5724.96 | 88872.90 |
| 2009 | 57.13 | 50.50 | 6.63 | 230.05 | 13.53 | 6.96  | 67.53 | 37.54 | 44.41 | 3.09 | 3.87 | 10.38 | 5.10 | 6.35 | 46.70 | 74.40 | 5925.88 | 88843.59 |
| 2010 | 57.71 | 51.07 | 6.64 | 231.19 | 18.95 | 8.82  | 69.75 | 26.26 | 62.35 | 5.50 | 3.32 | 10.64 | 4.99 | 6.26 | 46.90 | 74.70 | 6040.98 | 88824.29 |
| 2011 | 58.20 | 51.49 | 6.70 | 233.52 | 20.77 | 8.58  | 69.67 | 25.80 | 62.97 | 5.40 | 3.18 | 10.91 | 4.92 | 6.16 | 47.20 | 75.00 | 6152.00 | 88683.29 |
| 2012 | 58.74 | 52.00 | 6.74 | 235.71 | 20.35 | 8.21  | 54.90 | 21.92 | 60.08 | 4.93 | 3.28 | 11.19 | 4.84 | 6.06 | 47.50 | 75.30 | 6254.37 | 88570.69 |
| 2013 | 59.20 | 52.43 | 6.77 | 239.33 | 20.86 | 8.03  | 44.67 | 20.21 | 54.74 | 4.40 | 3.63 | 11.47 | 4.78 | 5.96 | 47.80 | 75.50 | -       | 88453.40 |
| 2014 | 59.58 | 52.78 | 6.80 | 243.10 | 21.55 | 7.54  | 44.48 | 21.02 | 52.73 | 3.97 | 3.56 | 11.76 | 4.74 | 5.87 | 48.00 | 75.80 | -       | 88368.19 |
| 2015 | 59.97 | 53.14 | 6.84 | 226.53 | -     | -     | -     | -     | -     | -    | -    | 12.06 | 4.74 | 5.78 | 48.00 | 75.90 | -       | 88268.33 |
| 2016 | 60.34 | 53.51 | 6.83 | 218.28 | -     | -     | -     | -     | -     | -    | -    | 12.36 | 4.81 | -    | -     | -     | -       | 88203.48 |
| 2017 | 61.55 | 53.80 | 7.75 | -      | -     | -     | -     | -     | -     | -    | -    | -     | -    | -    | -     | -     | -       | -        |

|          |      |       |       |      |        |       |      |       |       |       |      |      |       |      |      |       |       |           |          |
|----------|------|-------|-------|------|--------|-------|------|-------|-------|-------|------|------|-------|------|------|-------|-------|-----------|----------|
| Cambodia | 1995 | 58.19 | 50.59 | 7.60 | 343.47 | 17.33 | 5.39 | 99.30 | 78.58 | 20.86 | 1.12 | 4.26 | 17.31 | 6.01 | 4.69 | 7.70  | 30.30 | 20790.18  | 90454.76 |
|          | 1996 | 58.35 | 50.74 | 7.61 | 351.29 | 23.63 | 7.43 | 99.20 | 63.90 | 35.59 | 2.64 | 4.78 | 17.68 | 5.99 | 4.50 | 9.40  | 32.60 | 19023.22  | 90507.94 |
|          | 1997 | 58.61 | 50.96 | 7.66 | 360.66 | 19.62 | 6.46 | 99.30 | 67.70 | 31.82 | 2.06 | 4.40 | 18.06 | 5.93 | 4.33 | 11.20 | 34.80 | 19550.57  | 90601.02 |
|          | 1998 | 58.88 | 51.18 | 7.70 | 368.87 | 16.19 | 6.02 | 99.23 | 76.87 | 22.53 | 1.36 | 4.67 | 18.36 | 5.82 | 4.15 | 12.90 | 37.10 | 125316.38 | 90702.84 |
|          | 1999 | 59.22 | 51.46 | 7.76 | 402.87 | 16.49 | 5.60 | 99.33 | 78.31 | 21.16 | 1.18 | 4.41 | 18.47 | 5.69 | 3.97 | 14.60 | 39.40 | 54731.98  | 90807.42 |
|          | 2000 | 59.53 | 51.69 | 7.84 | 428.51 | 17.63 | 5.87 | 99.36 | 76.65 | 22.85 | 1.34 | 4.53 | 18.59 | 5.57 | 3.81 | 16.30 | 41.60 | 42118.31  | 90910.62 |
|          | 2001 | 60.14 | 52.26 | 7.88 | 454.08 | 18.28 | 5.70 | 99.39 | 76.66 | 22.86 | 1.30 | 4.40 | 18.70 | 5.58 | 3.65 | 18.00 | 43.90 | 63995.78  | 90914.40 |

|      |       |       |      |         |       |      |       |       |       |      |      |       |      |      |       |       |           |          |
|------|-------|-------|------|---------|-------|------|-------|-------|-------|------|------|-------|------|------|-------|-------|-----------|----------|
| 2002 | 60.75 | 52.81 | 7.94 | 475.05  | 20.11 | 5.95 | 99.34 | 73.94 | 25.57 | 1.52 | 4.43 | 18.82 | 5.60 | 3.52 | 19.80 | 46.10 | 108594.63 | 90902.68 |
| 2003 | 61.41 | 53.40 | 8.01 | 506.70  | 24.38 | 6.74 | 99.29 | 63.71 | 35.83 | 2.42 | 4.33 | 18.94 | 5.63 | 3.41 | 21.50 | 48.40 | 105986.66 | 90880.13 |
| 2004 | 62.12 | 54.02 | 8.10 | 550.10  | 26.18 | 6.43 | 99.23 | 62.33 | 37.19 | 2.39 | 4.04 | 19.06 | 5.66 | 3.31 | 23.20 | 50.60 | 178379.10 | 90845.91 |
| 2005 | 62.96 | 54.75 | 8.20 | 613.28  | 27.60 | 5.84 | 99.26 | 71.76 | 27.70 | 1.62 | 4.22 | 19.17 | 5.69 | 3.23 | 24.90 | 52.90 | 101252.49 | 90813.09 |
| 2006 | 63.83 | 55.59 | 8.24 | 669.04  | 24.09 | 4.48 | 99.08 | 71.76 | 27.58 | 1.24 | 3.24 | 19.29 | 5.74 | 3.16 | 26.60 | 55.10 | 102119.77 | 90747.89 |
| 2007 | 64.58 | 56.26 | 8.32 | 726.46  | 23.57 | 3.75 | 98.81 | 35.29 | 35.29 | 1.32 | 2.42 | 19.41 | 5.78 | 3.09 | 28.40 | 57.40 | 197112.04 | 90680.79 |
| 2008 | 65.26 | 56.87 | 8.38 | 763.69  | 41.27 | 5.55 | 75.89 | 60.70 | 20.01 | 1.11 | 4.44 | 19.53 | 5.82 | 3.02 | 30.10 | 59.70 | 120478.86 | 90640.85 |
| 2009 | 65.78 | 57.34 | 8.43 | 752.98  | 46.74 | 6.36 | 75.95 | 60.26 | 20.65 | 1.31 | 5.04 | 19.67 | 5.87 | 2.95 | 31.90 | 61.90 | 87674.95  | 90604.13 |
| 2010 | 66.20 | 57.77 | 8.43 | 785.69  | 46.59 | 5.95 | 79.52 | 60.27 | 24.20 | 1.44 | 4.51 | 19.81 | 5.93 | 2.88 | 33.60 | 64.20 | 126272.20 | 90588.45 |
| 2011 | 66.69 | 58.20 | 8.50 | 827.98  | 49.60 | 5.64 | 80.28 | 61.21 | 23.75 | 1.34 | 4.30 | 19.97 | 6.00 | 2.81 | 35.40 | 66.50 | 126838.76 | 90570.38 |
| 2012 | 67.25 | 58.69 | 8.56 | 874.16  | 59.12 | 6.24 | 93.48 | 70.96 | 24.10 | 1.50 | 4.74 | 20.14 | 6.07 | 2.74 | 37.20 | 68.80 | 127399.59 | 90563.71 |
| 2013 | 67.66 | 59.06 | 8.60 | 923.73  | 60.44 | 5.93 | 95.63 | 73.10 | 23.56 | 1.40 | 4.54 | 20.32 | 6.15 | 2.68 | 39.00 | 71.10 | -         | 90553.05 |
| 2014 | 68.05 | 59.41 | 8.64 | 972.98  | 61.28 | 5.68 | 95.17 | 74.19 | 22.04 | 1.25 | 4.42 | 20.51 | 6.26 | 2.63 | 40.80 | 73.40 | -         | 90533.33 |
| 2015 | 68.41 | 59.74 | 8.67 | 1024.87 | -     | -    | -     | -     | -     | -    | -    | 20.72 | 6.41 | 2.59 | 42.40 | 75.50 | -         | 90524.56 |
| 2016 | 68.75 | 60.12 | 8.63 | 1079.11 | -     | -    | -     | -     | -     | -    | -    | 20.95 | 6.62 | -    | -     | -     | -         | 90519.10 |
| 2017 | 69.88 | 60.74 | 9.14 | -       | -     | -    | -     | -     | -     | -    | -    | -     | -    | -    | -     | -     | -         | -        |

|          |      |       |       |      |         |       |      |       |       |       |      |      |       |      |      |       |       |           |          |
|----------|------|-------|-------|------|---------|-------|------|-------|-------|-------|------|------|-------|------|------|-------|-------|-----------|----------|
| Cameroon | 1995 | 56.48 | 48.70 | 7.78 | 1065.12 | 25.15 | 3.86 | 93.76 | 71.90 | 23.32 | 0.90 | 2.96 | 42.57 | 6.86 | 5.98 | 41.00 | 56.50 | 90767.15  | 88257.49 |
|          | 1996 | 56.05 | 48.37 | 7.68 | 1083.28 | 34.46 | 5.17 | 95.34 | 78.85 | 17.29 | 0.89 | 4.27 | 43.16 | 6.83 | 5.89 | 41.30 | 57.60 | 89198.54  | 88283.33 |
|          | 1997 | 55.50 | 47.95 | 7.56 | 1111.55 | 28.81 | 4.64 | 94.54 | 74.62 | 21.08 | 0.98 | 3.67 | 43.76 | 6.77 | 5.80 | 41.50 | 58.60 | 90784.24  | 88330.72 |
|          | 1998 | 54.99 | 47.55 | 7.44 | 1132.95 | 28.77 | 4.42 | 94.51 | 77.75 | 17.74 | 0.78 | 3.64 | 44.35 | 6.70 | 5.72 | 41.70 | 59.70 | 157727.29 | 88367.88 |
|          | 1999 | 54.77 | 47.37 | 7.40 | 1152.35 | 28.64 | 4.43 | 94.47 | 76.70 | 18.80 | 0.83 | 3.60 | 44.94 | 6.62 | 5.65 | 42.00 | 60.70 | 134749.25 | 88430.12 |
|          | 2000 | 54.45 | 47.10 | 7.34 | 1163.43 | 26.12 | 4.48 | 94.40 | 74.74 | 20.82 | 0.93 | 3.55 | 45.54 | 6.52 | 5.58 | 42.20 | 61.70 | 163101.04 | 88480.35 |
|          | 2001 | 54.42 | 47.11 | 7.31 | 1183.44 | 27.70 | 4.70 | 94.43 | 71.75 | 24.02 | 1.13 | 3.57 | 46.14 | 6.50 | 5.52 | 42.40 | 62.80 | 118945.30 | 88463.64 |
|          | 2002 | 54.44 | 47.15 | 7.30 | 1201.91 | 31.53 | 4.86 | 94.43 | 69.38 | 26.53 | 1.29 | 3.57 | 46.74 | 6.46 | 5.48 | 42.70 | 63.80 | 128242.37 | 88474.15 |
|          | 2003 | 54.50 | 47.21 | 7.29 | 1224.16 | 39.34 | 4.97 | 94.52 | 69.21 | 26.78 | 1.33 | 3.64 | 47.34 | 6.41 | 5.43 | 42.90 | 64.90 | 167009.84 | 88468.26 |
|          | 2004 | 54.63 | 47.33 | 7.30 | 1272.85 | 42.24 | 4.73 | 94.47 | 71.91 | 23.88 | 1.13 | 3.60 | 47.94 | 6.34 | 5.39 | 43.20 | 65.90 | 97585.68  | 88472.20 |
|          | 2005 | 54.86 | 47.52 | 7.34 | 1264.15 | 43.48 | 4.75 | 94.50 | 72.22 | 23.57 | 1.12 | 3.63 | 48.54 | 6.27 | 5.35 | 43.40 | 66.90 | 160728.00 | 88472.14 |
|          | 2006 | 55.27 | 47.93 | 7.34 | 1272.88 | 45.23 | 4.69 | 94.48 | 72.78 | 22.97 | 1.08 | 3.61 | 49.14 | 6.24 | 5.31 | 43.70 | 68.00 | 123887.44 | 88464.02 |
|          | 2007 | 55.60 | 48.25 | 7.34 | 1299.29 | 50.94 | 4.76 | 94.57 | 22.41 | 22.41 | 1.07 | 3.69 | 49.74 | 6.20 | 5.27 | 43.90 | 69.00 | 120331.65 | 88454.18 |

|      |       |       |      |         |       |      |       |       |       |      |      |       |      |      |       |       |           |          |
|------|-------|-------|------|---------|-------|------|-------|-------|-------|------|------|-------|------|------|-------|-------|-----------|----------|
| 2008 | 56.17 | 48.77 | 7.40 | 1308.24 | 61.69 | 5.18 | 95.12 | 75.84 | 20.27 | 1.05 | 4.13 | 50.34 | 6.16 | 5.22 | 44.20 | 70.00 | 120917.19 | 88457.18 |
| 2009 | 56.76 | 49.30 | 7.47 | 1300.84 | 59.05 | 5.07 | 94.68 | 70.72 | 25.31 | 1.28 | 3.79 | 50.93 | 6.10 | 5.17 | 44.40 | 71.00 | 116739.19 | 88461.23 |
| 2010 | 57.24 | 49.73 | 7.50 | 1309.12 | 60.63 | 5.28 | 94.67 | 67.66 | 28.53 | 1.51 | 3.78 | 51.52 | 6.04 | 5.11 | 44.70 | 72.10 | 99823.28  | 88466.38 |
| 2011 | 57.67 | 50.16 | 7.51 | 1326.65 | 49.87 | 3.96 | 73.35 | 48.70 | 33.61 | 1.33 | 2.63 | 52.10 | 6.02 | 5.05 | 44.90 | 73.10 | 100386.55 | 88463.21 |
| 2012 | 58.24 | 50.70 | 7.54 | 1349.95 | 53.03 | 4.34 | 85.98 | 64.84 | 24.58 | 1.07 | 3.27 | 52.68 | 6.00 | 4.98 | 45.20 | 74.10 | 100922.14 | 88477.69 |
| 2013 | 58.72 | 51.16 | 7.56 | 1385.24 | 57.15 | 4.29 | 85.98 | 65.70 | 23.58 | 1.01 | 3.28 | 53.25 | 5.96 | 4.92 | 45.40 | 75.10 | -         | 88491.31 |
| 2014 | 59.13 | 51.55 | 7.58 | 1428.22 | 58.65 | 4.10 | 85.98 | 66.31 | 22.87 | 0.94 | 3.17 | 53.82 | 5.92 | 4.85 | 45.60 | 75.40 | -         | 88520.78 |
| 2015 | 59.63 | 52.01 | 7.62 | 1469.64 | -     | -    | -     | -     | -     | -    | -    | 54.38 | 5.88 | 4.78 | 45.80 | 75.60 | -         | 88568.74 |
| 2016 | 60.14 | 52.49 | 7.65 | 1495.44 | -     | -    | -     | -     | -     | -    | -    | 54.94 | 5.87 | -    | -     | -     | -         | 88613.83 |
| 2017 | 62.98 | 54.49 | 8.49 | -       | -     | -    | -     | -     | -     | -    | -    | -     | -    | -    | -     | -     | -         | -        |

|        |      |       |       |       |          |         |       |       |       |       |      |      |       |       |      |       |       |            |          |
|--------|------|-------|-------|-------|----------|---------|-------|-------|-------|-------|------|------|-------|-------|------|-------|-------|------------|----------|
| Canada | 1995 | 78.07 | 68.26 | 9.81  | 37569.47 | 1830.54 | 8.86  | 55.61 | 15.99 | 71.25 | 6.31 | 2.55 | 77.68 | 17.68 | 1.64 | 99.80 | 99.80 | 836025.63  | 89170.56 |
|        | 1996 | 78.31 | 68.46 | 9.85  | 37765.73 | 1838.85 | 8.64  | 55.63 | 16.26 | 70.77 | 6.11 | 2.52 | 77.95 | 17.86 | 1.59 | 99.80 | 99.80 | 698763.38  | 89251.20 |
|        | 1997 | 78.57 | 68.67 | 9.90  | 38967.95 | 1882.63 | 8.60  | 56.54 | 16.90 | 70.12 | 6.03 | 2.57 | 78.34 | 18.02 | 1.55 | 99.80 | 99.80 | 690068.75  | 89346.02 |
|        | 1998 | 78.78 | 68.84 | 9.94  | 40131.70 | 1856.23 | 8.83  | 55.31 | 16.28 | 70.56 | 6.23 | 2.60 | 78.72 | 18.17 | 1.53 | 99.80 | 99.80 | 1129087.11 | 89434.46 |
|        | 1999 | 79.01 | 69.02 | 10.00 | 41856.05 | 1945.37 | 8.73  | 54.54 | 16.38 | 69.96 | 6.11 | 2.62 | 79.10 | 18.30 | 1.51 | 99.80 | 99.80 | 821594.26  | 89528.78 |
|        | 2000 | 79.26 | 69.19 | 10.07 | 43638.28 | 2099.84 | 8.67  | 53.67 | 15.91 | 70.35 | 6.10 | 2.57 | 79.48 | 18.41 | 1.49 | 99.80 | 99.80 | 760643.00  | 89647.89 |
|        | 2001 | 79.48 | 69.40 | 10.09 | 43964.95 | 2162.23 | 9.10  | 50.73 | 15.23 | 69.98 | 6.36 | 2.73 | 79.81 | 18.51 | 1.51 | 99.80 | 99.80 | 718534.46  | 89723.86 |
|        | 2002 | 79.66 | 69.56 | 10.10 | 44883.83 | 2262.07 | 9.37  | 49.87 | 15.20 | 69.52 | 6.51 | 2.86 | 79.89 | 18.59 | 1.52 | 99.80 | 99.80 | 908686.15  | 89807.84 |
|        | 2003 | 79.84 | 69.72 | 10.12 | 45239.81 | 2690.51 | 9.54  | 48.71 | 14.53 | 70.17 | 6.69 | 2.85 | 79.97 | 18.68 | 1.53 | 99.80 | 99.80 | 951373.04  | 89892.02 |
|        | 2004 | 80.05 | 69.90 | 10.15 | 46170.92 | 3062.67 | 9.56  | 49.27 | 14.62 | 70.32 | 6.72 | 2.84 | 80.05 | 18.80 | 1.53 | 99.80 | 99.80 | 1040136.77 | 89966.05 |
|        | 2005 | 80.23 | 70.06 | 10.18 | 47181.56 | 3474.44 | 9.57  | 49.11 | 14.62 | 70.24 | 6.72 | 2.85 | 80.12 | 18.96 | 1.54 | 99.80 | 99.80 | 849798.74  | 90042.56 |
|        | 2006 | 80.48 | 70.23 | 10.24 | 48035.04 | 3945.46 | 9.75  | 49.42 | 15.01 | 69.62 | 6.79 | 2.96 | 80.21 | 19.15 | 1.59 | 99.80 | 99.80 | 894922.55  | 90162.74 |
|        | 2007 | 80.65 | 70.36 | 10.29 | 48552.70 | 4382.43 | 9.83  | 49.39 | 70.09 | 70.09 | 6.89 | 2.94 | 80.40 | 19.37 | 1.66 | 99.80 | 99.80 | 892066.85  | 90275.20 |
|        | 2008 | 80.87 | 70.51 | 10.36 | 48510.57 | 4682.04 | 10.03 | 49.33 | 14.60 | 70.41 | 7.06 | 2.97 | 80.58 | 19.65 | 1.68 | 99.80 | 99.80 | 908926.00  | 90380.99 |
|        | 2009 | 81.12 | 70.68 | 10.44 | 46543.79 | 4582.08 | 11.17 | 48.78 | 14.23 | 70.83 | 7.91 | 3.26 | 80.76 | 20.00 | 1.67 | 99.80 | 99.80 | 749863.65  | 90505.97 |
|        | 2010 | 81.34 | 70.81 | 10.53 | 47447.48 | 5347.69 | 11.20 | 49.22 | 14.58 | 70.39 | 7.88 | 3.32 | 80.94 | 20.46 | 1.63 | 99.80 | 99.80 | 764137.68  | 90643.60 |
|        | 2011 | 81.53 | 70.96 | 10.57 | 48456.96 | 5665.42 | 10.82 | 48.17 | 14.00 | 70.94 | 7.68 | 3.14 | 81.12 | 20.98 | 1.61 | 99.80 | 99.80 | 1033481.98 | 90628.15 |
|        | 2012 | 81.66 | 71.06 | 10.60 | 48724.25 | 5719.03 | 10.78 | 47.36 | 13.74 | 70.98 | 7.65 | 3.13 | 81.29 | 21.58 | 1.61 | 99.80 | 99.80 | 1027063.85 | 90637.18 |
|        | 2013 | 81.75 | 71.12 | 10.63 | 49355.10 | 5619.38 | 10.67 | 47.09 | 13.64 | 71.03 | 7.58 | 3.09 | 81.47 | 22.27 | 1.59 | 99.80 | 99.80 | -          | 90642.00 |

|            |       |       |       |         |          |         |       |       |       |       |      |       |       |       |       |       |       |           |          |
|------------|-------|-------|-------|---------|----------|---------|-------|-------|-------|-------|------|-------|-------|-------|-------|-------|-------|-----------|----------|
|            | 2014  | 81.79 | 71.16 | 10.64   | 50067.04 | 5291.75 | 10.45 | 46.79 | 13.60 | 70.93 | 7.41 | 3.04  | 81.65 | 23.01 | 1.60  | 99.80 | 99.80 | -         | 90653.24 |
|            | 2015  | 81.77 | 71.14 | 10.63   | 50109.88 | -       | -     | -     | -     | -     | -    | -     | 81.83 | 23.79 | 1.60  | 99.80 | 99.80 | -         | 90652.67 |
|            | 2016  | 81.85 | 71.20 | 10.66   | 50231.89 | -       | -     | -     | -     | -     | -    | -     | 82.01 | 24.57 | -     | -     | -     | -         | 90655.38 |
|            | 2017  | 81.96 | 70.51 | 11.45   | -        | -       | -     | -     | -     | -     | -    | -     | -     | -     | -     | -     | -     | -         | -        |
| Cape Verde | 1995  | 67.28 | 58.45 | 8.83    | 1377.42  | 66.65   | 5.29  | 94.01 | 18.40 | 80.43 | 4.25 | 1.03  | 48.77 | 9.15  | 4.54  | 34.60 | 79.90 | 252.28    | 87350.31 |
|            | 1996  | 68.77 | 59.74 | 9.02    | 1496.61  | 60.96   | 4.82  | 92.90 | 17.02 | 81.68 | 3.94 | 0.88  | 49.70 | 9.30  | 4.38  | 35.00 | 79.90 | 233.24    | 87337.77 |
|            | 1997  | 68.99 | 59.94 | 9.04    | 1624.70  | 57.01   | 4.73  | 93.00 | 17.09 | 81.62 | 3.86 | 0.87  | 50.64 | 9.42  | 4.22  | 37.10 | 80.50 | 248.80    | 87350.49 |
|            | 1998  | 69.23 | 60.16 | 9.07    | 1788.00  | 65.58   | 5.24  | 95.23 | 23.85 | 74.95 | 3.93 | 1.31  | 51.57 | 9.53  | 4.07  | 39.30 | 81.10 | 263.81    | 87370.97 |
|            | 1999  | 69.40 | 60.32 | 9.08    | 1946.85  | 64.61   | 4.65  | 95.19 | 25.06 | 73.67 | 3.42 | 1.22  | 52.51 | 9.64  | 3.91  | 41.50 | 81.80 | 274.24    | 87400.57 |
|            | 2000  | 69.81 | 60.66 | 9.15    | 2179.98  | 59.11   | 4.81  | 95.16 | 25.45 | 73.25 | 3.52 | 1.29  | 53.44 | 9.78  | 3.76  | 43.60 | 82.40 | 333.36    | 87437.90 |
|            | 2001  | 70.06 | 60.90 | 9.16    | 2185.25  | 65.32   | 5.19  | 95.05 | 23.36 | 75.43 | 3.91 | 1.27  | 54.29 | 9.91  | 3.62  | 45.70 | 83.00 | 301.76    | 87495.04 |
|            | 2002  | 70.30 | 61.12 | 9.18    | 2257.32  | 70.58   | 5.17  | 95.06 | 23.52 | 75.26 | 3.89 | 1.28  | 55.15 | 10.04 | 3.48  | 47.80 | 83.70 | 309.04    | 87560.29 |
|            | 2003  | 70.54 | 61.34 | 9.20    | 2310.49  | 87.92   | 5.00  | 95.04 | 23.78 | 74.98 | 3.75 | 1.25  | 56.00 | 10.15 | 3.36  | 49.90 | 84.30 | 317.11    | 87605.64 |
|            | 2004  | 70.77 | 61.55 | 9.22    | 2505.17  | 99.75   | 5.06  | 95.05 | 23.89 | 74.87 | 3.79 | 1.27  | 56.85 | 10.20 | 3.24  | 52.00 | 85.00 | 335.59    | 87672.43 |
|            | 2005  | 71.00 | 61.76 | 9.24    | 2639.38  | 103.62  | 4.86  | 95.01 | 23.63 | 75.13 | 3.65 | 1.21  | 57.69 | 10.17 | 3.13  | 54.00 | 85.60 | 362.76    | 87723.68 |
|            | 2006  | 71.26 | 62.02 | 9.24    | 2813.19  | 126.41  | 5.11  | 94.98 | 21.40 | 77.47 | 3.96 | 1.15  | 58.53 | 9.99  | 3.02  | 56.10 | 86.30 | -         | 87752.03 |
|            | 2007  | 71.21 | 61.98 | 9.23    | 3202.38  | 135.32  | 4.30  | 94.51 | 78.72 | 78.72 | 3.39 | 0.92  | 59.36 | 9.77  | 2.93  | 58.10 | 86.90 | -         | 87765.68 |
|            | 2008  | 71.83 | 62.52 | 9.31    | 3378.65  | 146.55  | 3.96  | 94.69 | 22.11 | 76.65 | 3.04 | 0.93  | 60.19 | 9.51  | 2.83  | 60.20 | 87.60 | 369.12    | 87824.56 |
|            | 2009  | 72.05 | 62.72 | 9.34    | 3300.55  | 149.23  | 4.24  | 93.74 | 22.17 | 76.35 | 3.24 | 1.00  | 61.02 | 9.24  | 2.75  | 62.20 | 88.30 | 376.40    | 87866.44 |
|            | 2010  | 72.26 | 62.93 | 9.33    | 3312.83  | 163.98  | 4.83  | 89.79 | 26.01 | 71.03 | 3.43 | 1.40  | 61.83 | 8.95  | 2.67  | 64.20 | 88.90 | -         | 87952.25 |
|            | 2011  | 72.51 | 63.13 | 9.37    | 3405.78  | 173.17  | 4.60  | 88.32 | 24.25 | 72.54 | 3.34 | 1.26  | 62.62 | 8.50  | 2.59  | 66.20 | 89.60 | -         | 88021.32 |
|            | 2012  | 72.68 | 63.30 | 9.38    | 3403.03  | 161.16  | 4.61  | 88.35 | 24.33 | 72.46 | 3.34 | 1.27  | 63.39 | 8.02  | 2.53  | 68.10 | 90.30 | -         | 88099.05 |
|            | 2013  | 72.93 | 63.53 | 9.40    | 3389.94  | 155.56  | 4.29  | 87.89 | 24.01 | 72.68 | 3.12 | 1.17  | 64.13 | 7.57  | 2.47  | 70.10 | 91.00 | -         | 88186.02 |
|            | 2014  | 73.17 | 63.75 | 9.42    | 3369.64  | 173.31  | 4.76  | 88.04 | 22.24 | 74.74 | 3.56 | 1.20  | 64.84 | 7.21  | 2.42  | 72.00 | 91.70 | -         | 88271.41 |
| 2015       | 73.31 | 63.89 | 9.42  | 3364.18 | -        | -       | -     | -     | -     | -     | -    | 65.53 | 6.95  | 2.37  | 72.20 | 91.70 | -     | 88372.85  |          |
| 2016       | 73.59 | 64.18 | 9.41  | 3452.95 | -        | -       | -     | -     | -     | -     | -    | 66.19 | 6.84  | -     | -     | -     | -     | 88466.37  |          |
| 2017       | 75.77 | 65.85 | 9.91  | -       | -        | -       | -     | -     | -     | -     | -    | -     | -     | -     | -     | -     | -     | -         |          |
| Central    | 1995  | 46.07 | 39.76 | 6.31    | 431.50   | 12.05   | 3.60  | 93.45 | 58.08 | 37.85 | 1.36 | 2.24  | 37.23 | 7.37  | 5.62  | 15.60 | 60.20 | 133886.53 | 92010.86 |
|            | 1996  | 45.50 | 39.30 | 6.20    | 404.22   | 13.25   | 4.49  | 93.46 | 51.36 | 45.04 | 2.02 | 2.47  | 37.31 | 7.38  | 5.59  | 15.90 | 60.60 | 129536.67 | 92001.73 |

|         |       |       |       |        |        |       |      |       |       |       |      |       |       |      |       |       |       |           |          |
|---------|-------|-------|-------|--------|--------|-------|------|-------|-------|-------|------|-------|-------|------|-------|-------|-------|-----------|----------|
| African | 1997  | 44.98 | 38.89 | 6.09   | 415.79 | 9.62  | 3.59 | 93.49 | 61.81 | 33.88 | 1.22 | 2.37  | 37.39 | 7.35 | 5.56  | 16.20 | 61.10 | 132321.70 | 91998.99 |
|         | 1998  | 44.80 | 38.75 | 6.05   | 425.64 | 10.14 | 3.75 | 93.19 | 57.96 | 37.81 | 1.42 | 2.33  | 37.48 | 7.30 | 5.54  | 16.50 | 61.60 | 548910.53 | 92006.63 |
|         | 1999  | 44.59 | 38.57 | 6.01   | 431.47 | 11.14 | 4.07 | 93.44 | 50.50 | 45.96 | 1.87 | 2.20  | 37.56 | 7.23 | 5.52  | 16.90 | 62.00 | 437192.12 | 92011.06 |
|         | 2000  | 44.37 | 38.38 | 5.99   | 411.94 | 10.40 | 4.24 | 93.01 | 46.85 | 49.63 | 2.10 | 2.13  | 37.64 | 7.14 | 5.50  | 17.20 | 62.50 | 499622.06 | 92028.76 |
|         | 2001  | 44.30 | 38.35 | 5.95   | 421.66 | 9.70  | 3.95 | 92.56 | 48.88 | 47.19 | 1.86 | 2.09  | 37.72 | 7.15 | 5.48  | 17.50 | 62.90 | 453849.63 | 92017.18 |
|         | 2002  | 44.43 | 38.49 | 5.94   | 428.48 | 10.70 | 4.16 | 92.66 | 46.78 | 49.51 | 2.06 | 2.10  | 37.80 | 7.13 | 5.46  | 17.80 | 63.40 | 350970.59 | 92016.37 |
|         | 2003  | 44.55 | 38.61 | 5.94   | 397.81 | 12.52 | 4.31 | 92.94 | 48.15 | 48.19 | 2.08 | 2.23  | 37.88 | 7.09 | 5.44  | 18.20 | 63.80 | 532900.06 | 92018.71 |
|         | 2004  | 44.69 | 38.75 | 5.95   | 414.03 | 13.06 | 4.10 | 92.68 | 50.98 | 44.99 | 1.85 | 2.26  | 37.97 | 7.03 | 5.41  | 18.50 | 64.30 | 345419.44 | 92028.83 |
|         | 2005  | 44.94 | 38.95 | 5.99   | 410.41 | 14.28 | 4.29 | 92.44 | 46.87 | 49.29 | 2.11 | 2.18  | 38.07 | 6.94 | 5.38  | 18.90 | 64.80 | 455529.68 | 92043.16 |
|         | 2006  | 45.25 | 39.26 | 5.99   | 422.44 | 14.24 | 3.99 | 91.89 | 47.57 | 48.24 | 1.92 | 2.06  | 38.18 | 6.97 | 5.35  | 19.20 | 65.20 | 595439.93 | 92046.82 |
|         | 2007  | 45.66 | 39.64 | 6.02   | 434.25 | 16.34 | 4.04 | 91.36 | 50.36 | 50.36 | 2.04 | 2.01  | 38.32 | 6.97 | 5.32  | 19.60 | 65.70 | 695449.72 | 92058.97 |
|         | 2008  | 46.27 | 40.18 | 6.09   | 436.07 | 19.97 | 4.30 | 85.08 | 39.81 | 53.21 | 2.29 | 2.01  | 38.47 | 6.95 | 5.29  | 19.90 | 66.20 | 603473.10 | 92067.06 |
|         | 2009  | 46.89 | 40.73 | 6.17   | 437.60 | 16.25 | 3.58 | 83.30 | 48.43 | 41.86 | 1.50 | 2.08  | 38.64 | 6.90 | 5.25  | 20.30 | 66.70 | 428273.61 | 92077.27 |
|         | 2010  | 47.41 | 41.18 | 6.22   | 446.44 | 17.41 | 3.90 | 90.49 | 44.59 | 50.73 | 1.98 | 1.92  | 38.83 | 6.82 | 5.22  | 20.70 | 67.20 | 511442.69 | 92085.00 |
|         | 2011  | 47.97 | 41.69 | 6.28   | 458.33 | 18.09 | 3.73 | 90.48 | 45.87 | 49.30 | 1.84 | 1.89  | 39.03 | 6.90 | 5.17  | 21.10 | 67.70 | 513289.52 | 92075.67 |
|         | 2012  | 48.55 | 42.21 | 6.34   | 475.67 | 17.02 | 3.62 | 90.46 | 46.31 | 48.80 | 1.77 | 1.85  | 39.26 | 6.96 | 5.12  | 21.50 | 68.20 | 515134.08 | 92076.07 |
|         | 2013  | 47.87 | 41.67 | 6.19   | 300.48 | 12.53 | 3.82 | 90.49 | 45.19 | 50.06 | 1.91 | 1.91  | 39.50 | 6.98 | 5.07  | 21.60 | 68.30 | -         | 92080.16 |
|         | 2014  | 48.25 | 42.02 | 6.23   | 302.55 | 15.59 | 4.20 | 90.59 | 46.22 | 48.97 | 2.06 | 2.14  | 39.76 | 6.98 | 5.01  | 21.70 | 68.40 | -         | 92085.77 |
| 2015    | 49.63 | 43.19 | 6.44  | 314.93 | -      | -     | -    | -     | -     | -     | -    | 40.04 | 6.96  | 4.94 | 21.80 | 68.50 | -     | 92102.74  |          |
| 2016    | 50.16 | 43.65 | 6.51  | 325.72 | -      | -     | -    | -     | -     | -     | -    | 40.33 | 6.92  | -    | -     | -     | -     | -         | 92113.23 |
| 2017    | 51.87 | 44.75 | 7.12  | -      | -      | -     | -    | -     | -     | -     | -    | -     | -     | -    | -     | -     | -     | -         | -        |
| Chad    | 1995  | 53.45 | 46.08 | 7.37   | 484.76 | 11.95 | 5.79 | 96.48 | 62.94 | 34.77 | 2.01 | 3.77  | 21.47 | 6.25 | 7.43  | 8.80  | 42.30 | 17935.69  | 88173.82 |
|         | 1996  | 52.99 | 45.72 | 7.27   | 479.04 | 12.01 | 5.41 | 96.18 | 61.32 | 36.24 | 1.96 | 3.45  | 21.51 | 6.21 | 7.43  | 9.00  | 42.80 | 17780.53  | 88164.11 |
|         | 1997  | 52.72 | 45.50 | 7.22   | 489.10 | 11.45 | 5.56 | 96.18 | 62.19 | 35.34 | 1.96 | 3.59  | 21.54 | 6.16 | 7.42  | 9.20  | 43.30 | 18882.93  | 88175.28 |
|         | 1998  | 52.43 | 45.26 | 7.17   | 505.16 | 12.17 | 5.41 | 96.21 | 66.71 | 30.66 | 1.66 | 3.75  | 21.57 | 6.09 | 7.41  | 9.40  | 43.80 | 110317.97 | 88190.91 |
|         | 1999  | 52.36 | 45.20 | 7.16   | 484.08 | 11.19 | 5.87 | 96.22 | 63.58 | 33.92 | 1.99 | 3.88  | 21.60 | 6.01 | 7.38  | 9.50  | 44.30 | 123674.32 | 88208.18 |
|         | 2000  | 52.15 | 44.98 | 7.17   | 462.53 | 10.42 | 6.28 | 96.20 | 55.32 | 42.50 | 2.67 | 3.61  | 21.64 | 5.93 | 7.35  | 9.70  | 44.70 | 129247.65 | 88232.80 |
|         | 2001  | 52.43 | 45.23 | 7.20   | 497.35 | 12.01 | 6.09 | 94.59 | 57.34 | 39.38 | 2.40 | 3.69  | 21.67 | 5.89 | 7.32  | 9.90  | 45.20 | 104127.31 | 88185.25 |
|         | 2002  | 52.59 | 45.37 | 7.21   | 519.28 | 18.40 | 8.33 | 94.39 | 63.90 | 32.31 | 2.69 | 5.64  | 21.70 | 5.83 | 7.27  | 10.10 | 45.70 | 127184.57 | 88146.61 |

|      |       |       |      |        |       |      |       |       |       |      |      |       |      |      |       |       |           |          |
|------|-------|-------|------|--------|-------|------|-------|-------|-------|------|------|-------|------|------|-------|-------|-----------|----------|
| 2003 | 52.76 | 45.52 | 7.24 | 573.33 | 16.06 | 5.49 | 91.73 | 53.83 | 41.31 | 2.27 | 3.22 | 21.74 | 5.77 | 7.21 | 10.30 | 46.20 | 132429.25 | 88105.56 |
| 2004 | 53.11 | 45.82 | 7.29 | 737.99 | 26.01 | 5.72 | 92.83 | 55.51 | 40.20 | 2.30 | 3.42 | 21.77 | 5.69 | 7.15 | 10.50 | 46.70 | 125121.30 | 88074.08 |
| 2005 | 53.85 | 46.41 | 7.44 | 835.20 | 25.81 | 3.91 | 90.98 | 54.73 | 39.84 | 1.56 | 2.35 | 21.80 | 5.61 | 7.07 | 10.70 | 47.20 | 123870.95 | 88040.45 |
| 2006 | 54.05 | 46.64 | 7.41 | 812.01 | 23.65 | 3.32 | 89.32 | 58.96 | 33.99 | 1.13 | 2.19 | 21.83 | 5.56 | 6.99 | 10.80 | 47.70 | 127646.75 | 87974.14 |
| 2007 | 54.88 | 47.37 | 7.51 | 811.02 | 26.82 | 3.35 | 88.73 | 37.36 | 37.36 | 1.25 | 2.10 | 21.87 | 5.51 | 6.90 | 11.00 | 48.20 | 128596.50 | 87916.02 |
| 2008 | 55.18 | 47.66 | 7.52 | 808.89 | 27.10 | 2.92 | 87.61 | 57.67 | 34.17 | 1.00 | 1.92 | 21.90 | 5.44 | 6.80 | 11.20 | 48.70 | 119558.38 | 87848.99 |
| 2009 | 55.91 | 48.30 | 7.61 | 815.97 | 26.58 | 3.31 | 87.07 | 54.64 | 37.24 | 1.23 | 2.08 | 21.93 | 5.35 | 6.70 | 11.40 | 49.20 | 102031.54 | 87812.43 |
| 2010 | 56.48 | 48.80 | 7.68 | 896.57 | 26.42 | 2.95 | 85.86 | 51.35 | 40.19 | 1.19 | 1.76 | 21.98 | 5.26 | 6.59 | 11.60 | 49.70 | 109130.42 | 87776.77 |
| 2011 | 56.96 | 49.24 | 7.72 | 868.00 | 31.32 | 3.17 | 86.33 | 44.51 | 48.44 | 1.53 | 1.63 | 22.05 | 5.20 | 6.48 | 11.80 | 50.20 | 109463.64 | 87754.12 |
| 2012 | 57.53 | 49.73 | 7.79 | 914.12 | 29.18 | 3.00 | 86.33 | 45.42 | 47.39 | 1.42 | 1.58 | 22.13 | 5.12 | 6.37 | 12.00 | 50.70 | 109796.02 | 87736.26 |
| 2013 | 58.16 | 50.28 | 7.88 | 934.70 | 33.67 | 3.42 | 86.33 | 41.50 | 51.93 | 1.77 | 1.64 | 22.23 | 5.05 | 6.26 | 12.00 | 50.80 | -         | 87731.38 |
| 2014 | 58.67 | 50.73 | 7.95 | 967.10 | 37.10 | 3.62 | 86.33 | 39.15 | 54.65 | 1.98 | 1.64 | 22.34 | 4.98 | 6.16 | 12.00 | 50.80 | -         | 87736.47 |
| 2015 | 59.18 | 51.16 | 8.02 | 953.59 | -     | -    | -     | -     | -     | -    | -    | 22.47 | 4.93 | 6.05 | 12.10 | 50.80 | -         | 87732.48 |
| 2016 | 59.83 | 51.72 | 8.11 | 859.65 | -     | -    | -     | -     | -     | -    | -    | 22.62 | 4.93 | -    | -     | -     | -         | 87729.91 |
| 2017 | 60.03 | 51.48 | 8.55 | -      | -     | -    | -     | -     | -     | -    | -    | -     | -    | -    | -     | -     | -         | -        |

|       |      |       |       |       |          |        |      |       |       |       |      |      |       |       |      |       |       |           |          |
|-------|------|-------|-------|-------|----------|--------|------|-------|-------|-------|------|------|-------|-------|------|-------|-------|-----------|----------|
| Chile | 1995 | 75.41 | 65.88 | 9.53  | 8051.49  | 266.97 | 5.15 | 62.31 | 48.49 | 48.18 | 2.48 | 4.01 | 84.55 | 10.56 | 2.31 | 88.30 | 92.70 | 66432.85  | 88718.66 |
|       | 1996 | 75.71 | 66.10 | 9.61  | 8479.88  | 303.31 | 5.66 | 63.56 | 49.44 | 47.17 | 2.67 | 4.40 | 84.86 | 10.74 | 2.27 | 89.00 | 93.20 | 73626.89  | 88745.04 |
|       | 1997 | 76.19 | 66.46 | 9.73  | 8987.62  | 333.68 | 5.78 | 66.54 | 53.53 | 47.14 | 2.72 | 4.65 | 85.17 | 10.92 | 2.23 | 89.70 | 93.60 | 82392.69  | 88782.49 |
|       | 1998 | 76.56 | 66.74 | 9.83  | 9254.79  | 341.34 | 6.23 | 66.09 | 52.32 | 48.11 | 3.00 | 4.94 | 85.48 | 11.10 | 2.18 | 90.30 | 94.10 | 91627.89  | 88846.22 |
|       | 1999 | 76.89 | 66.98 | 9.91  | 9101.00  | 318.93 | 6.40 | 66.26 | 51.07 | 49.86 | 3.19 | 4.93 | 85.78 | 11.27 | 2.14 | 91.00 | 94.50 | 97091.05  | 88931.19 |
|       | 2000 | 77.27 | 67.26 | 10.01 | 9469.11  | 326.16 | 6.40 | 65.53 | 47.00 | 52.10 | 3.33 | 4.59 | 86.07 | 11.42 | 2.11 | 91.70 | 94.90 | 90384.58  | 89028.20 |
|       | 2001 | 77.47 | 67.41 | 10.06 | 9666.48  | 299.81 | 6.51 | 65.90 | 46.59 | 53.54 | 3.48 | 4.60 | 86.36 | 11.57 | 2.07 | 92.30 | 95.30 | 90862.19  | 89201.19 |
|       | 2002 | 77.70 | 67.61 | 10.09 | 9852.83  | 290.11 | 6.48 | 66.81 | 47.39 | 54.51 | 3.53 | 4.59 | 86.65 | 11.70 | 2.05 | 92.90 | 95.60 | 91214.15  | 89372.09 |
|       | 2003 | 77.90 | 67.79 | 10.11 | 10141.73 | 352.96 | 7.34 | 66.97 | 42.45 | 36.62 | 2.69 | 4.65 | 86.92 | 11.84 | 2.02 | 93.60 | 96.00 | 94236.30  | 89535.28 |
|       | 2004 | 78.11 | 67.97 | 10.14 | 10754.31 | 430.31 | 6.93 | 67.14 | 41.59 | 38.05 | 2.64 | 4.30 | 87.19 | 12.00 | 2.00 | 94.20 | 96.30 | 99878.51  | 89718.80 |
|       | 2005 | 78.42 | 68.26 | 10.17 | 11249.87 | 508.88 | 6.69 | 67.30 | 41.79 | 37.90 | 2.54 | 4.15 | 87.44 | 12.20 | 1.98 | 94.80 | 96.70 | 101594.28 | 89894.05 |
|       | 2006 | 78.74 | 68.51 | 10.23 | 11833.95 | 584.73 | 6.18 | 67.18 | 39.82 | 40.73 | 2.52 | 3.66 | 87.69 | 12.42 | 1.96 | 95.40 | 97.00 | 101965.01 | 89985.50 |
|       | 2007 | 78.98 | 68.67 | 10.31 | 12285.05 | 664.98 | 6.35 | 65.79 | 41.85 | 41.85 | 2.66 | 3.69 | 87.93 | 12.67 | 1.95 | 96.00 | 97.30 | 113127.23 | 90057.17 |
|       | 2008 | 79.26 | 68.88 | 10.38 | 12588.69 | 739.62 | 6.87 | 64.27 | 36.74 | 42.84 | 2.94 | 3.93 | 88.16 | 12.95 | 1.93 | 96.60 | 97.60 | 111021.04 | 90129.22 |

|      |       |       |       |          |         |      |       |       |       |      |      |       |       |      |       |       |           |          |
|------|-------|-------|-------|----------|---------|------|-------|-------|-------|------|------|-------|-------|------|-------|-------|-----------|----------|
| 2009 | 79.26 | 68.88 | 10.38 | 12268.44 | 754.59  | 7.39 | 63.70 | 33.82 | 46.91 | 3.47 | 3.92 | 88.38 | 13.23 | 1.90 | 97.10 | 97.90 | 110404.53 | 90199.49 |
| 2010 | 79.19 | 68.87 | 10.32 | 12860.18 | 891.12  | 6.97 | 63.86 | 33.66 | 47.28 | 3.29 | 3.67 | 88.59 | 13.52 | 1.88 | 97.70 | 98.20 | 114285.00 | 90258.01 |
| 2011 | 79.52 | 69.12 | 10.40 | 13518.77 | 1023.22 | 7.00 | 63.98 | 33.54 | 47.58 | 3.33 | 3.67 | 88.79 | 13.81 | 1.86 | 98.30 | 98.50 | 117661.68 | 90300.40 |
| 2012 | 79.67 | 69.25 | 10.42 | 14109.14 | 1108.01 | 7.24 | 62.80 | 32.64 | 48.03 | 3.48 | 3.76 | 88.99 | 14.09 | 1.83 | 98.80 | 98.70 | 120687.89 | 90359.31 |
| 2013 | 79.86 | 69.41 | 10.45 | 14551.04 | 1192.05 | 7.53 | 62.43 | 32.32 | 48.24 | 3.63 | 3.90 | 89.18 | 14.39 | 1.82 | 99.00 | 99.00 | -         | 90425.04 |
| 2014 | 80.10 | 69.61 | 10.49 | 14701.95 | 1137.36 | 7.79 | 62.37 | 31.52 | 49.47 | 3.85 | 3.93 | 89.36 | 14.74 | 1.80 | 99.00 | 99.00 | -         | 90496.31 |
| 2015 | 80.21 | 69.72 | 10.49 | 14907.12 | -       | -    | -     | -     | -     | -    | -    | 89.53 | 15.16 | 1.79 | 99.10 | 99.00 | -         | 90579.00 |
| 2016 | 80.32 | 69.90 | 10.42 | 15019.63 | -       | -    | -     | -     | -     | -    | -    | 89.70 | 15.63 | -    | -     | -     | -         | 90657.17 |
| 2017 | 79.70 | 68.69 | 11.01 | -        | -       | -    | -     | -     | -     | -    | -    | -     | -     | -    | -     | -     | -         | -        |

|       |      |       |       |      |         |        |      |       |       |       |      |      |       |       |      |       |       |            |          |
|-------|------|-------|-------|------|---------|--------|------|-------|-------|-------|------|------|-------|-------|------|-------|-------|------------|----------|
| China | 1995 | 68.29 | 61.08 | 7.21 | 1227.56 | 21.02  | 3.53 | 93.74 | 46.40 | 50.50 | 1.78 | 1.75 | 30.96 | 9.28  | 1.64 | 53.20 | 73.90 | 5042349.12 | 87074.06 |
|       | 1996 | 68.62 | 61.38 | 7.24 | 1335.36 | 26.32  | 3.79 | 94.82 | 50.64 | 46.59 | 1.76 | 2.02 | 31.92 | 9.46  | 1.57 | 54.30 | 75.20 | 5181880.51 | 87013.86 |
|       | 1997 | 68.92 | 61.65 | 7.27 | 1443.77 | 30.92  | 4.02 | 94.77 | 52.84 | 44.24 | 1.78 | 2.24 | 32.88 | 9.64  | 1.53 | 55.40 | 76.50 | 5113706.85 | 86985.88 |
|       | 1998 | 69.25 | 61.94 | 7.31 | 1542.06 | 35.40  | 4.33 | 94.26 | 54.85 | 41.81 | 1.81 | 2.52 | 33.87 | 9.81  | 1.50 | 56.60 | 77.80 | 5141402.70 | 86991.70 |
|       | 1999 | 69.61 | 62.25 | 7.36 | 1645.99 | 38.72  | 4.49 | 94.48 | 55.85 | 40.89 | 1.83 | 2.65 | 34.87 | 9.97  | 1.49 | 57.70 | 79.10 | 5079293.70 | 87042.92 |
|       | 2000 | 69.94 | 62.55 | 7.40 | 1771.74 | 43.63  | 4.60 | 95.56 | 58.98 | 38.28 | 1.76 | 2.84 | 35.88 | 10.09 | 1.50 | 58.80 | 80.30 | 5082325.60 | 87154.72 |
|       | 2001 | 70.22 | 62.80 | 7.42 | 1905.61 | 47.54  | 4.56 | 93.07 | 59.97 | 35.57 | 1.62 | 2.94 | 37.09 | 10.23 | 1.51 | 60.00 | 81.60 | 5145521.55 | 87271.05 |
|       | 2002 | 70.52 | 63.08 | 7.44 | 2065.72 | 54.47  | 4.79 | 89.96 | 57.72 | 35.83 | 1.71 | 3.07 | 38.43 | 10.35 | 1.52 | 61.20 | 82.80 | 5474914.90 | 87422.80 |
|       | 2003 | 71.22 | 63.65 | 7.57 | 2258.91 | 61.59  | 4.82 | 87.61 | 55.87 | 36.23 | 1.75 | 3.07 | 39.78 | 10.45 | 1.54 | 62.40 | 84.00 | 6226962.50 | 87593.94 |
|       | 2004 | 71.78 | 64.12 | 7.66 | 2472.59 | 70.62  | 4.72 | 86.48 | 53.64 | 37.97 | 1.79 | 2.93 | 41.14 | 10.54 | 1.55 | 63.70 | 85.20 | 7116642.40 | 87768.14 |
|       | 2005 | 72.26 | 64.55 | 7.71 | 2738.21 | 80.94  | 4.66 | 85.26 | 52.21 | 38.77 | 1.81 | 2.85 | 42.52 | 10.63 | 1.57 | 64.90 | 86.30 | 7803535.60 | 87951.56 |
|       | 2006 | 72.88 | 65.05 | 7.84 | 3069.30 | 94.05  | 4.52 | 83.09 | 49.31 | 40.65 | 1.84 | 2.68 | 43.87 | 10.74 | 1.57 | 66.10 | 87.40 | 8573395.40 | 88118.91 |
|       | 2007 | 73.38 | 65.40 | 7.98 | 3487.85 | 115.29 | 4.32 | 83.01 | 46.93 | 46.93 | 2.03 | 2.29 | 45.20 | 10.86 | 1.58 | 67.20 | 88.50 | 9124046.50 | 88281.41 |
|       | 2008 | 73.60 | 65.56 | 8.04 | 3805.03 | 157.68 | 4.59 | 80.76 | 40.42 | 49.95 | 2.29 | 2.30 | 46.54 | 11.00 | 1.58 | 68.40 | 89.50 | 10022024.8 | 88442.79 |
|       | 2009 | 74.12 | 65.97 | 8.14 | 4142.04 | 192.52 | 5.08 | 78.86 | 37.46 | 52.50 | 2.66 | 2.41 | 47.88 | 11.17 | 1.59 | 69.60 | 90.50 | 10617264.9 | 88602.77 |
|       | 2010 | 74.42 | 66.25 | 8.17 | 4560.51 | 220.08 | 4.89 | 77.24 | 35.29 | 54.31 | 2.65 | 2.23 | 49.23 | 11.39 | 1.59 | 70.80 | 91.40 | 11183810.6 | 88777.50 |
|       | 2011 | 74.87 | 66.57 | 8.30 | 4971.54 | 279.48 | 5.03 | 78.83 | 34.77 | 55.89 | 2.81 | 2.22 | 50.57 | 11.66 | 1.59 | 71.90 | 92.30 | 12064260.0 | 88855.21 |
|       | 2012 | 75.25 | 66.88 | 8.36 | 5336.06 | 328.66 | 5.26 | 77.97 | 34.34 | 55.96 | 2.95 | 2.32 | 51.89 | 11.95 | 1.60 | 73.10 | 93.20 | 12454710.6 | 88948.62 |
|       | 2013 | 75.52 | 67.11 | 8.41 | 5721.69 | 375.14 | 5.39 | 76.66 | 33.88 | 55.81 | 3.01 | 2.38 | 53.17 | 12.30 | 1.60 | 74.20 | 94.00 | -          | 89051.05 |
|       | 2014 | 75.68 | 67.25 | 8.43 | 6108.24 | 419.73 | 5.55 | 72.35 | 31.99 | 55.79 | 3.10 | 2.45 | 54.41 | 12.75 | 1.61 | 75.40 | 94.80 | -          | 89164.68 |

|          |      |       |       |      |         |        |      |        |       |       |      |      |       |       |      |       |       |           |          |
|----------|------|-------|-------|------|---------|--------|------|--------|-------|-------|------|------|-------|-------|------|-------|-------|-----------|----------|
|          | 2015 | 76.04 | 67.53 | 8.51 | 6496.62 | -      | -    | -      | -     | -     | -    | -    | 55.61 | 13.32 | 1.62 | 76.50 | 95.50 | -         | 89293.00 |
|          | 2016 | 76.36 | 67.85 | 8.51 | 6893.78 | -      | -    | -      | -     | -     | -    | -    | 56.78 | 14.03 | -    | -     | -     | -         | 89442.77 |
|          | 2017 | 77.07 | 68.09 | 8.98 | -       | -      | -    | -      | -     | -     | -    | -    | -     | -     | -    | -     | -     | -         | -        |
| Colombia | 1995 | 71.93 | 63.68 | 8.25 | 4841.37 | 166.93 | 6.76 | 84.71  | 38.06 | 55.06 | 3.72 | 3.04 | 70.52 | 7.18  | 2.66 | 72.00 | 89.20 | 179102.11 | 87594.12 |
|          | 1996 | 72.11 | 63.84 | 8.27 | 4862.07 | 208.36 | 8.16 | 85.38  | 32.36 | 62.10 | 5.07 | 3.09 | 70.83 | 7.23  | 2.60 | 72.50 | 89.40 | 183442.78 | 87662.89 |
|          | 1997 | 72.64 | 64.28 | 8.36 | 4951.25 | 247.20 | 8.96 | 85.90  | 32.25 | 62.46 | 5.59 | 3.36 | 71.15 | 7.28  | 2.54 | 73.10 | 89.50 | 188061.88 | 87751.06 |
|          | 1998 | 73.00 | 64.57 | 8.42 | 4904.75 | 219.11 | 8.73 | 80.34  | 24.15 | 69.94 | 6.10 | 2.62 | 71.46 | 7.33  | 2.48 | 73.60 | 89.60 | 165331.70 | 87842.52 |
|          | 1999 | 73.00 | 64.59 | 8.42 | 4629.50 | 187.95 | 8.67 | 72.36  | 18.46 | 74.48 | 6.46 | 2.21 | 71.77 | 7.39  | 2.43 | 74.10 | 89.70 | 149560.77 | 87934.11 |
|          | 2000 | 73.19 | 64.76 | 8.44 | 4764.17 | 146.01 | 5.91 | 59.04  | 12.22 | 79.30 | 4.68 | 1.22 | 72.08 | 7.44  | 2.39 | 74.60 | 89.90 | 164520.43 | 88039.16 |
|          | 2001 | 73.33 | 64.87 | 8.46 | 4774.98 | 142.81 | 5.96 | 59.10  | 12.59 | 78.70 | 4.69 | 1.27 | 72.38 | 7.51  | 2.35 | 75.10 | 90.00 | 153808.68 | 88171.81 |
|          | 2002 | 73.54 | 65.05 | 8.49 | 4825.83 | 133.59 | 5.67 | 55.86  | 11.03 | 80.26 | 4.55 | 1.12 | 72.68 | 7.59  | 2.31 | 75.60 | 90.10 | 148233.52 | 88312.52 |
|          | 2003 | 74.32 | 65.70 | 8.61 | 4945.96 | 132.98 | 5.92 | 47.17  | 8.15  | 82.72 | 4.90 | 1.02 | 72.98 | 7.67  | 2.27 | 76.10 | 90.20 | 162980.74 | 88441.86 |
|          | 2004 | 74.54 | 65.90 | 8.63 | 5139.98 | 147.18 | 5.37 | 60.50  | 14.51 | 76.02 | 4.08 | 1.29 | 73.28 | 7.76  | 2.24 | 76.60 | 90.30 | 174608.71 | 88586.84 |
|          | 2005 | 74.99 | 66.31 | 8.67 | 5312.08 | 196.93 | 5.82 | 65.94  | 17.01 | 74.21 | 4.32 | 1.50 | 73.58 | 7.86  | 2.20 | 77.10 | 90.50 | 150617.80 | 88723.23 |
|          | 2006 | 75.18 | 66.52 | 8.67 | 5596.73 | 226.69 | 6.11 | 71.63  | 18.48 | 74.20 | 4.54 | 1.58 | 73.88 | 7.98  | 2.16 | 77.50 | 90.60 | 151546.74 | 88788.47 |
|          | 2007 | 75.79 | 66.98 | 8.81 | 5910.29 | 292.30 | 6.25 | 72.47  | 72.59 | 72.59 | 4.54 | 1.71 | 74.17 | 8.11  | 2.12 | 78.00 | 90.70 | 177034.10 | 88856.92 |
|          | 2008 | 76.02 | 67.18 | 8.84 | 6048.09 | 359.71 | 6.62 | 73.69  | 21.39 | 70.97 | 4.70 | 1.92 | 74.46 | 8.26  | 2.08 | 78.40 | 90.80 | 167450.09 | 88935.15 |
|          | 2009 | 76.15 | 67.29 | 8.85 | 6078.32 | 361.03 | 7.01 | 70.22  | 18.67 | 73.42 | 5.15 | 1.86 | 74.75 | 8.44  | 2.04 | 78.90 | 90.90 | 171912.03 | 89009.50 |
|          | 2010 | 76.45 | 67.59 | 8.86 | 6250.65 | 422.39 | 6.76 | 67.37  | 17.76 | 73.63 | 4.98 | 1.78 | 75.04 | 8.66  | 2.01 | 79.30 | 91.00 | 166695.87 | 89117.16 |
|          | 2011 | 77.03 | 68.03 | 9.01 | 6592.40 | 479.62 | 6.64 | 64.03  | 15.63 | 75.59 | 5.02 | 1.62 | 75.32 | 8.91  | 1.98 | 79.80 | 91.10 | 170199.58 | 89166.91 |
|          | 2012 | 77.33 | 68.27 | 9.06 | 6789.53 | 546.71 | 6.93 | 60.94  | 14.55 | 76.12 | 5.28 | 1.66 | 75.60 | 9.19  | 1.95 | 80.20 | 91.20 | 173411.77 | 89214.74 |
|          | 2013 | 77.70 | 68.56 | 9.13 | 7051.04 | 549.37 | 6.84 | 58.10  | 13.79 | 76.26 | 5.22 | 1.62 | 75.88 | 9.51  | 1.92 | 80.60 | 91.30 | -         | 89290.65 |
|          | 2014 | 77.90 | 68.73 | 9.17 | 7291.69 | 569.19 | 7.20 | 61.73  | 15.36 | 75.12 | 5.41 | 1.79 | 76.16 | 9.86  | 1.90 | 81.10 | 91.30 | -         | 89384.09 |
|          | 2015 | 78.07 | 68.88 | 9.19 | 7446.18 | -      | -    | -      | -     | -     | -    | -    | 76.44 | 10.25 | 1.87 | 81.10 | 91.40 | -         | 89493.62 |
|          | 2016 | 78.26 | 69.09 | 9.17 | 7525.86 | -      | -    | -      | -     | -     | -    | -    | 76.71 | 10.66 | -    | -     | -     | -         | 89593.79 |
|          | 2017 | 80.11 | 70.40 | 9.71 | -       | -      | -    | -      | -     | -     | -    | -    | -     | -     | -    | -     | -     | -         | -        |
| Comoros  | 1995 | 59.96 | 52.45 | 7.51 | 782.97  | 22.31  | 4.61 | 100.00 | 37.58 | 62.42 | 2.88 | 1.73 | 28.30 | 6.00  | 5.84 | 21.30 | 90.10 | 317.95    | 89028.27 |
|          | 1996 | 59.23 | 51.87 | 7.36 | 751.92  | 20.95  | 4.48 | 100.00 | 39.42 | 60.58 | 2.71 | 1.77 | 28.26 | 5.97  | 5.74 | 22.10 | 90.10 | 325.15    | 89042.12 |
|          | 1997 | 60.15 | 52.65 | 7.50 | 761.46  | 18.81  | 4.49 | 100.00 | 42.46 | 57.54 | 2.58 | 1.91 | 28.21 | 5.92  | 5.64 | 22.80 | 90.10 | 331.39    | 89069.98 |

|      |       |       |      |        |       |      |        |       |       |      |      |       |      |      |       |       |        |          |
|------|-------|-------|------|--------|-------|------|--------|-------|-------|------|------|-------|------|------|-------|-------|--------|----------|
| 1998 | 60.16 | 52.65 | 7.50 | 751.13 | 16.75 | 4.04 | 100.00 | 45.97 | 54.03 | 2.19 | 1.86 | 28.17 | 5.87 | 5.55 | 23.60 | 90.10 | 341.63 | 89100.64 |
| 1999 | 61.23 | 53.54 | 7.69 | 746.09 | 16.13 | 3.87 | 100.00 | 49.21 | 50.79 | 1.96 | 1.90 | 28.12 | 5.80 | 5.47 | 24.30 | 90.10 | 355.47 | 89139.23 |
| 2000 | 61.46 | 53.73 | 7.73 | 806.43 | 13.11 | 3.56 | 100.00 | 57.17 | 42.83 | 1.52 | 2.03 | 28.08 | 5.73 | 5.38 | 25.10 | 90.10 | 365.90 | 89181.46 |
| 2001 | 62.36 | 54.52 | 7.84 | 805.16 | 11.21 | 2.86 | 100.00 | 61.72 | 38.28 | 1.09 | 1.76 | 28.04 | 5.70 | 5.31 | 25.80 | 90.10 | 423.63 | 89160.69 |
| 2002 | 62.68 | 54.83 | 7.85 | 804.21 | 14.53 | 3.39 | 100.00 | 50.71 | 49.29 | 1.67 | 1.72 | 27.99 | 5.66 | 5.24 | 26.60 | 90.10 | 406.27 | 89162.93 |
| 2003 | 63.50 | 55.55 | 7.95 | 801.80 | 19.66 | 3.65 | 100.00 | 50.26 | 49.74 | 1.82 | 1.83 | 27.95 | 5.61 | 5.17 | 27.40 | 90.10 | 387.33 | 89165.97 |
| 2004 | 63.96 | 55.96 | 7.99 | 798.01 | 24.14 | 3.96 | 100.00 | 49.22 | 50.78 | 2.01 | 1.95 | 27.90 | 5.55 | 5.10 | 28.10 | 90.10 | 389.63 | 89187.31 |
| 2005 | 64.28 | 56.29 | 7.98 | 801.33 | 26.54 | 4.32 | 100.00 | 47.32 | 52.68 | 2.27 | 2.04 | 27.87 | 5.48 | 5.04 | 28.90 | 90.10 | 480.84 | 89215.11 |
| 2006 | 64.53 | 56.55 | 7.98 | 803.11 | 29.29 | 4.57 | 100.00 | 45.16 | 54.84 | 2.51 | 2.06 | 27.86 | 5.46 | 4.98 | 29.60 | 90.10 | 385.28 | 89215.15 |
| 2007 | 64.69 | 56.68 | 8.01 | 790.37 | 35.11 | 4.93 | 100.00 | 56.85 | 56.85 | 2.80 | 2.13 | 27.85 | 5.43 | 4.93 | 30.40 | 90.10 | 513.65 | 89212.17 |
| 2008 | 65.28 | 57.21 | 8.08 | 774.68 | 40.34 | 5.13 | 100.00 | 39.68 | 60.32 | 3.09 | 2.04 | 27.86 | 5.39 | 4.87 | 31.20 | 90.10 | 579.09 | 89246.03 |
| 2009 | 64.90 | 56.91 | 7.99 | 770.99 | 29.33 | 3.82 | 100.00 | 54.89 | 45.11 | 1.72 | 2.09 | 27.88 | 5.34 | 4.81 | 31.90 | 90.10 | 531.67 | 89279.68 |
| 2010 | 65.92 | 57.81 | 8.11 | 769.17 | 44.23 | 5.82 | 47.96  | 35.99 | 24.97 | 1.45 | 4.37 | 27.92 | 5.27 | 4.75 | 32.70 | 90.10 | 543.62 | 89343.76 |
| 2011 | 65.61 | 57.56 | 8.05 | 770.32 | 49.93 | 6.10 | 67.12  | 48.88 | 27.17 | 1.66 | 4.44 | 27.97 | 5.23 | 4.69 | 33.50 | 90.10 | 554.34 | 89314.14 |
| 2012 | 66.20 | 58.07 | 8.13 | 774.47 | 55.30 | 7.11 | 67.12  | 42.12 | 37.24 | 2.65 | 4.46 | 28.03 | 5.18 | 4.63 | 34.20 | 90.10 | 564.22 | 89335.42 |
| 2013 | 66.51 | 58.36 | 8.16 | 782.52 | 53.57 | 6.51 | 67.12  | 46.46 | 30.77 | 2.00 | 4.51 | 28.10 | 5.13 | 4.56 | 35.00 | 90.10 | -      | 89349.14 |
| 2014 | 66.95 | 58.73 | 8.21 | 779.84 | 56.76 | 6.75 | 67.12  | 45.06 | 32.86 | 2.22 | 4.53 | 28.19 | 5.09 | 4.49 | 35.80 | 90.10 | -      | 89371.57 |
| 2015 | 67.25 | 59.00 | 8.25 | 769.48 | -     | -    | -      | -     | -     | -    | -    | 28.30 | 5.08 | 4.42 | 35.80 | 90.10 | -      | 89412.14 |
| 2016 | 67.54 | 59.29 | 8.25 | 768.44 | -     | -    | -      | -     | -     | -    | -    | 28.41 | 5.12 | -    | -     | -     | -      | 89431.28 |
| 2017 | 68.63 | 59.97 | 8.66 | -      | -     | -    | -      | -     | -     | -    | -    | -     | -    | -    | -     | -     | -      | -        |

|       |      |       |       |      |        |       |      |       |       |       |      |      |       |      |      |       |       |            |          |
|-------|------|-------|-------|------|--------|-------|------|-------|-------|-------|------|------|-------|------|------|-------|-------|------------|----------|
| Congo | 1995 | 52.65 | 45.67 | 6.98 | 381.72 | 4.35  | 3.25 | 81.39 | 77.60 | 4.66  | 0.15 | 3.10 | 32.84 | 5.74 | 6.78 | 20.30 | 45.20 | 1232299.89 | 90279.79 |
|       | 1996 | 52.28 | 45.39 | 6.90 | 367.43 | 4.03  | 3.03 | 82.74 | 79.66 | 3.73  | 0.11 | 2.92 | 33.29 | 5.77 | 6.78 | 20.80 | 45.60 | 1050676.58 | 90269.37 |
|       | 1997 | 46.54 | 40.68 | 5.86 | 338.41 | 4.95  | 3.62 | 82.39 | 77.72 | 5.66  | 0.20 | 3.41 | 33.74 | 5.78 | 6.77 | 21.30 | 46.00 | 998227.15  | 90276.87 |
|       | 1998 | 50.16 | 43.62 | 6.54 | 325.41 | 5.81  | 4.26 | 84.44 | 80.91 | 4.18  | 0.18 | 4.09 | 34.20 | 5.78 | 6.77 | 21.80 | 46.40 | 1014212.24 | 90288.83 |
|       | 1999 | 51.94 | 45.08 | 6.86 | 304.34 | 10.48 | 3.80 | 83.24 | 77.82 | 6.51  | 0.25 | 3.56 | 34.66 | 5.76 | 6.76 | 22.20 | 46.80 | 824119.40  | 90294.57 |
|       | 2000 | 52.75 | 45.72 | 7.03 | 276.22 | 18.16 | 1.45 | 56.51 | 54.76 | 3.09  | 0.04 | 1.40 | 35.12 | 5.73 | 6.75 | 22.70 | 47.10 | 861822.71  | 90294.45 |
|       | 2001 | 53.66 | 46.50 | 7.16 | 263.05 | 5.82  | 2.67 | 75.26 | 71.19 | 5.41  | 0.14 | 2.52 | 35.59 | 5.76 | 6.74 | 23.10 | 47.50 | 678319.48  | 90257.79 |
|       | 2002 | 54.39 | 47.11 | 7.27 | 262.97 | 4.43  | 2.59 | 75.49 | 70.82 | 6.19  | 0.16 | 2.43 | 36.06 | 5.78 | 6.73 | 23.50 | 47.90 | 763919.42  | 90240.55 |
|       | 2003 | 54.90 | 47.57 | 7.33 | 269.24 | 5.44  | 3.20 | 74.88 | 58.52 | 21.85 | 0.70 | 2.50 | 36.53 | 5.79 | 6.72 | 24.00 | 48.20 | 748084.20  | 90223.51 |

|      |       |       |      |        |       |      |       |       |       |      |      |       |      |      |       |       |           |          |
|------|-------|-------|------|--------|-------|------|-------|-------|-------|------|------|-------|------|------|-------|-------|-----------|----------|
| 2004 | 55.72 | 48.29 | 7.43 | 278.48 | 6.33  | 3.34 | 77.17 | 60.58 | 21.51 | 0.72 | 2.62 | 37.00 | 5.79 | 6.71 | 24.40 | 48.60 | 816309.43 | 90215.13 |
| 2005 | 56.49 | 48.94 | 7.55 | 286.29 | 6.71  | 3.14 | 75.18 | 57.19 | 23.93 | 0.75 | 2.39 | 37.48 | 5.78 | 6.69 | 24.80 | 49.00 | 794528.22 | 90223.04 |
| 2006 | 57.34 | 49.68 | 7.66 | 291.97 | 8.36  | 3.39 | 76.28 | 55.12 | 27.73 | 0.94 | 2.45 | 37.96 | 5.82 | 6.67 | 25.20 | 49.30 | 922488.68 | 90214.62 |
| 2007 | 57.84 | 50.10 | 7.73 | 300.29 | 9.87  | 3.61 | 75.39 | 33.50 | 33.50 | 1.21 | 2.40 | 38.45 | 5.84 | 6.65 | 25.60 | 49.70 | 895387.99 | 90195.88 |
| 2008 | 58.56 | 50.73 | 7.83 | 308.65 | 13.85 | 4.46 | 74.05 | 39.17 | 47.11 | 2.10 | 2.36 | 38.94 | 5.86 | 6.62 | 26.00 | 50.00 | 754085.86 | 90176.27 |
| 2009 | 59.44 | 51.47 | 7.97 | 307.11 | 16.06 | 5.61 | 64.82 | 37.53 | 42.10 | 2.36 | 3.25 | 39.44 | 5.87 | 6.59 | 26.40 | 50.40 | 731884.63 | 90159.98 |
| 2010 | 60.27 | 52.18 | 8.09 | 318.08 | 12.58 | 4.04 | 50.34 | 37.11 | 26.28 | 1.06 | 2.98 | 39.94 | 5.88 | 6.54 | 26.80 | 50.70 | 799228.67 | 90151.12 |
| 2011 | 60.96 | 52.78 | 8.18 | 328.75 | 12.38 | 3.53 | 60.20 | 38.82 | 35.51 | 1.26 | 2.28 | 40.44 | 5.92 | 6.49 | 27.20 | 51.10 | 800756.94 | 90089.99 |
| 2012 | 61.40 | 53.19 | 8.21 | 340.71 | 14.71 | 3.77 | 68.29 | 37.69 | 44.81 | 1.69 | 2.08 | 40.95 | 5.94 | 6.43 | 27.60 | 51.40 | 802271.30 | 90060.09 |
| 2013 | 61.84 | 53.60 | 8.24 | 357.57 | 16.08 | 3.89 | 59.73 | 39.39 | 34.05 | 1.32 | 2.56 | 41.46 | 5.96 | 6.36 | 27.90 | 51.80 | -         | 90019.74 |
| 2014 | 62.27 | 54.00 | 8.27 | 378.79 | 19.05 | 4.33 | 61.47 | 38.77 | 36.93 | 1.60 | 2.73 | 41.98 | 5.97 | 6.29 | 28.30 | 52.10 | -         | 90017.91 |
| 2015 | 62.53 | 54.26 | 8.27 | 391.72 | -     | -    | -     | -     | -     | -    | -    | 42.49 | 5.96 | 6.20 | 28.70 | 52.40 | -         | 89994.77 |
| 2016 | 62.89 | 54.63 | 8.25 | 388.27 | -     | -    | -     | -     | -     | -    | -    | 43.02 | 5.97 | -    | -     | -     | -         | 89987.85 |
| 2017 | 62.65 | 54.03 | 8.62 | -      | -     | -    | -     | -     | -     | -    | -    | -     | -    | -    | -     | -     | -         | -        |

|            |      |       |       |      |         |        |      |       |       |       |      |      |       |       |      |       |       |          |          |
|------------|------|-------|-------|------|---------|--------|------|-------|-------|-------|------|------|-------|-------|------|-------|-------|----------|----------|
| Costa Rica | 1995 | 76.96 | 67.99 | 8.97 | 5651.68 | 217.31 | 6.51 | 87.68 | 20.60 | 76.50 | 4.98 | 1.53 | 54.56 | 8.42  | 2.82 | 90.00 | 94.00 | 10054.85 | 87313.52 |
|            | 1996 | 77.05 | 68.07 | 8.98 | 5585.14 | 219.02 | 6.65 | 87.50 | 20.86 | 76.16 | 5.07 | 1.59 | 55.47 | 8.53  | 2.74 | 90.30 | 94.20 | 9907.29  | 87423.03 |
|            | 1997 | 77.23 | 68.21 | 9.02 | 5758.28 | 221.23 | 6.35 | 87.12 | 20.74 | 76.20 | 4.84 | 1.51 | 56.37 | 8.63  | 2.65 | 90.60 | 94.40 | 9924.61  | 87534.20 |
|            | 1998 | 77.48 | 68.41 | 9.07 | 6020.76 | 266.92 | 7.13 | 87.58 | 18.36 | 79.04 | 5.64 | 1.49 | 57.26 | 8.74  | 2.56 | 90.90 | 94.70 | 10575.34 | 87637.39 |
|            | 1999 | 77.72 | 68.59 | 9.13 | 6125.90 | 280.36 | 6.83 | 88.23 | 18.96 | 78.51 | 5.36 | 1.47 | 58.15 | 8.85  | 2.46 | 91.20 | 94.90 | 10338.55 | 87776.10 |
|            | 2000 | 77.96 | 68.77 | 9.19 | 6230.48 | 289.41 | 7.12 | 88.17 | 18.71 | 78.78 | 5.61 | 1.51 | 59.05 | 8.96  | 2.37 | 91.40 | 95.10 | 9851.27  | 87899.33 |
|            | 2001 | 78.22 | 68.97 | 9.24 | 6332.84 | 297.42 | 7.25 | 89.88 | 21.84 | 75.69 | 5.49 | 1.76 | 60.41 | 9.11  | 2.29 | 91.70 | 95.30 | 10917.34 | 88010.86 |
|            | 2002 | 78.47 | 69.18 | 9.30 | 6434.39 | 339.93 | 8.23 | 90.90 | 21.46 | 76.39 | 6.28 | 1.94 | 61.75 | 9.26  | 2.22 | 92.00 | 95.50 | 9998.17  | 88141.93 |
|            | 2003 | 78.74 | 69.38 | 9.36 | 6606.16 | 358.12 | 8.45 | 89.69 | 21.22 | 76.34 | 6.45 | 2.00 | 63.08 | 9.43  | 2.16 | 92.30 | 95.80 | 10415.84 | 88264.04 |
|            | 2004 | 79.04 | 69.61 | 9.43 | 6792.11 | 346.18 | 7.80 | 90.50 | 24.89 | 72.49 | 5.65 | 2.15 | 64.39 | 9.60  | 2.11 | 92.60 | 96.00 | 10571.67 | 88399.95 |
|            | 2005 | 79.31 | 69.84 | 9.47 | 6954.04 | 364.01 | 7.74 | 84.52 | 24.83 | 70.62 | 5.47 | 2.27 | 65.67 | 9.79  | 2.07 | 92.80 | 96.20 | 10095.24 | 88525.96 |
|            | 2006 | 79.59 | 70.05 | 9.54 | 7351.86 | 409.93 | 7.82 | 86.68 | 26.88 | 68.99 | 5.40 | 2.43 | 66.93 | 9.99  | 2.03 | 93.00 | 96.40 | 10715.12 | 88610.29 |
|            | 2007 | 79.91 | 70.28 | 9.64 | 7841.93 | 524.55 | 8.37 | 87.73 | 67.24 | 67.24 | 5.63 | 2.74 | 68.17 | 10.19 | 2.01 | 93.30 | 96.60 | 11298.03 | 88699.94 |
|            | 2008 | 80.12 | 70.43 | 9.69 | 8095.31 | 606.60 | 9.01 | 88.95 | 27.10 | 69.53 | 6.26 | 2.74 | 69.39 | 10.41 | 1.98 | 93.50 | 96.80 | 10806.54 | 88784.85 |
|            | 2009 | 80.27 | 70.54 | 9.74 | 7911.80 | 634.14 | 9.69 | 89.65 | 24.66 | 72.49 | 7.02 | 2.66 | 70.57 | 10.67 | 1.95 | 93.70 | 97.00 | 11067.75 | 88886.83 |

|               |      |       |       |      |         |        |      |       |       |       |      |      |       |       |      |       |       |           |          |
|---------------|------|-------|-------|------|---------|--------|------|-------|-------|-------|------|------|-------|-------|------|-------|-------|-----------|----------|
|               | 2010 | 80.37 | 70.63 | 9.74 | 8199.41 | 771.24 | 9.66 | 90.47 | 24.03 | 73.44 | 7.09 | 2.56 | 71.73 | 10.97 | 1.92 | 93.90 | 97.20 | 11684.57  | 88998.16 |
|               | 2011 | 80.50 | 70.71 | 9.79 | 8449.96 | 872.11 | 9.73 | 90.99 | 24.13 | 73.49 | 7.15 | 2.58 | 72.87 | 11.31 | 1.89 | 94.10 | 97.30 | 11994.69  | 89090.21 |
|               | 2012 | 80.57 | 70.77 | 9.80 | 8753.23 | 930.48 | 9.56 | 90.98 | 24.36 | 73.23 | 7.00 | 2.56 | 73.94 | 11.69 | 1.87 | 94.30 | 97.50 | 12274.13  | 89179.40 |
|               | 2013 | 80.67 | 70.86 | 9.81 | 8852.40 | 990.35 | 9.47 | 90.98 | 24.53 | 73.04 | 6.91 | 2.55 | 74.96 | 12.10 | 1.84 | 94.50 | 97.60 | -         | 89287.98 |
|               | 2014 | 80.77 | 70.94 | 9.83 | 9077.41 | 970.00 | 9.31 | 90.98 | 24.87 | 72.67 | 6.77 | 2.55 | 75.92 | 12.52 | 1.82 | 94.50 | 97.70 | -         | 89404.05 |
|               | 2015 | 80.89 | 71.04 | 9.85 | 9406.76 | -      | -    | -     | -     | -     | -    | -    | 76.82 | 12.94 | 1.80 | 94.50 | 97.80 | -         | 89530.01 |
|               | 2016 | 80.98 | 71.16 | 9.82 | 9714.10 | -      | -    | -     | -     | -     | -    | -    | 77.68 | 13.34 | -    | -     | -     | -         | 89654.52 |
|               | 2017 | 79.47 | 69.83 | 9.64 | -       | -      | -    | -     | -     | -     | -    | -    | -     | -     | -    | -     | -     | -         | -        |
| Cote d'Ivoire | 1995 | 52.54 | 45.45 | 7.09 | 1314.12 | 48.64  | 6.37 | 81.63 | 60.54 | 25.84 | 1.65 | 4.72 | 41.21 | 5.15  | 6.22 | 16.20 | 76.90 | 147447.84 | 89351.85 |
|               | 1996 | 52.46 | 45.44 | 7.01 | 1372.79 | 55.09  | 6.74 | 81.64 | 59.18 | 27.51 | 1.85 | 4.89 | 41.59 | 5.17  | 6.15 | 16.40 | 77.10 | 145020.63 | 89374.77 |
|               | 1997 | 52.53 | 45.54 | 7.00 | 1382.62 | 54.15  | 7.07 | 83.69 | 59.96 | 28.35 | 2.00 | 5.06 | 41.96 | 5.17  | 6.08 | 16.70 | 77.30 | 148926.94 | 89388.96 |
|               | 1998 | 52.49 | 45.53 | 6.95 | 1410.74 | 58.52  | 7.30 | 84.29 | 62.47 | 25.88 | 1.89 | 5.41 | 42.34 | 5.15  | 6.01 | 17.00 | 77.50 | 24962.96  | 89401.69 |
|               | 1999 | 52.44 | 45.53 | 6.92 | 1397.00 | 50.02  | 6.52 | 81.45 | 58.98 | 27.60 | 1.80 | 4.72 | 42.89 | 5.13  | 5.93 | 17.30 | 77.70 | 24317.16  | 89403.15 |
|               | 2000 | 52.42 | 45.52 | 6.90 | 1336.43 | 38.94  | 6.00 | 78.77 | 55.30 | 29.79 | 1.79 | 4.21 | 43.54 | 5.11  | 5.86 | 17.60 | 77.90 | 29442.74  | 89404.21 |
|               | 2001 | 52.47 | 45.75 | 6.72 | 1310.29 | 32.16  | 4.85 | 74.98 | 55.02 | 26.62 | 1.29 | 3.56 | 44.20 | 5.16  | 5.79 | 17.90 | 78.20 | 28584.19  | 89364.43 |
|               | 2002 | 52.72 | 45.96 | 6.76 | 1264.22 | 32.09  | 4.47 | 71.82 | 49.17 | 31.54 | 1.41 | 3.06 | 44.85 | 5.20  | 5.72 | 18.20 | 78.50 | 28670.94  | 89333.67 |
|               | 2003 | 52.92 | 46.13 | 6.79 | 1224.97 | 40.71  | 4.65 | 74.05 | 52.75 | 28.77 | 1.34 | 3.31 | 45.51 | 5.22  | 5.65 | 18.60 | 78.70 | 22407.15  | 89317.60 |
|               | 2004 | 53.13 | 46.30 | 6.83 | 1218.12 | 48.70  | 5.24 | 76.57 | 55.05 | 28.10 | 1.47 | 3.77 | 46.18 | 5.22  | 5.59 | 18.90 | 79.00 | 22931.74  | 89302.14 |
|               | 2005 | 53.51 | 46.61 | 6.90 | 1216.21 | 50.78  | 5.39 | 78.45 | 59.97 | 23.56 | 1.27 | 4.12 | 46.84 | 5.20  | 5.53 | 19.20 | 79.20 | 26282.74  | 89289.78 |
|               | 2006 | 53.92 | 46.98 | 6.94 | 1210.67 | 56.53  | 5.87 | 80.10 | 61.57 | 23.14 | 1.36 | 4.51 | 47.50 | 5.27  | 5.48 | 19.50 | 79.50 | 27248.77  | 89291.50 |
|               | 2007 | 54.49 | 47.46 | 7.03 | 1207.09 | 68.44  | 6.35 | 81.05 | 22.51 | 22.51 | 1.43 | 4.92 | 48.27 | 5.32  | 5.42 | 19.90 | 79.80 | 27859.55  | 89294.34 |
|               | 2008 | 55.04 | 47.93 | 7.11 | 1211.62 | 78.05  | 6.21 | 80.18 | 60.43 | 24.63 | 1.53 | 4.68 | 49.03 | 5.35  | 5.37 | 20.20 | 80.10 | 29682.24  | 89300.48 |
|               | 2009 | 55.62 | 48.42 | 7.20 | 1223.51 | 79.10  | 6.41 | 78.09 | 57.43 | 26.46 | 1.70 | 4.72 | 49.80 | 5.36  | 5.32 | 20.60 | 80.40 | 30685.23  | 89315.18 |
|               | 2010 | 56.20 | 48.92 | 7.28 | 1219.75 | 78.17  | 6.32 | 76.85 | 56.48 | 26.51 | 1.68 | 4.65 | 50.56 | 5.34  | 5.27 | 20.90 | 80.70 | 32525.25  | 89330.95 |
|               | 2011 | 56.79 | 49.45 | 7.33 | 1138.66 | 79.09  | 6.42 | 77.13 | 57.48 | 25.48 | 1.64 | 4.78 | 51.31 | 5.37  | 5.22 | 21.30 | 80.90 | 33027.48  | 89444.62 |
|               | 2012 | 57.22 | 49.86 | 7.36 | 1229.78 | 78.72  | 6.14 | 75.51 | 52.34 | 30.68 | 1.89 | 4.26 | 52.04 | 5.37  | 5.16 | 21.60 | 81.20 | 33502.16  | 89557.85 |
|               | 2013 | 57.95 | 50.50 | 7.45 | 1305.71 | 84.08  | 5.81 | 71.85 | 49.63 | 30.92 | 1.80 | 4.01 | 52.77 | 5.35  | 5.10 | 22.00 | 81.50 | -         | 89685.16 |
|               | 2014 | 58.48 | 50.97 | 7.51 | 1384.91 | 88.37  | 5.72 | 71.93 | 50.81 | 29.36 | 1.68 | 4.04 | 53.48 | 5.33  | 5.04 | 22.30 | 81.80 | -         | 89825.59 |
|               | 2015 | 59.08 | 51.49 | 7.60 | 1469.73 | -      | -    | -     | -     | -     | -    | -    | 54.18 | 5.30  | 4.98 | 22.50 | 81.90 | -         | 89963.15 |

|         |      |       |       |       |          |         |      |        |       |       |      |      |       |       |      |       |       |          |          |          |
|---------|------|-------|-------|-------|----------|---------|------|--------|-------|-------|------|------|-------|-------|------|-------|-------|----------|----------|----------|
|         | 2016 | 59.87 | 52.15 | 7.72  | 1552.77  | -       | -    | -      | -     | -     | -    | -    | -     | 54.87 | 5.34 | -     | -     | -        | -        | 90120.55 |
|         | 2017 | 62.48 | 54.15 | 8.33  | -        | -       | -    | -      | -     | -     | -    | -    | -     | -     | -    | -     | -     | -        | -        | -        |
| Croatia | 1995 | 72.29 | 63.36 | 8.93  | 8475.14  | 324.13  | 6.74 | 100.00 | 13.54 | 86.46 | 5.83 | 0.91 | 54.89 | 20.16 | 1.58 | 97.30 | 98.20 | 24621.25 | 92769.09 |          |
|         | 1996 | 72.98 | 63.96 | 9.02  | 9322.35  | 362.08  | 7.01 | 100.00 | 12.42 | 87.58 | 6.14 | 0.87 | 55.03 | 20.83 | 1.67 | 97.30 | 98.20 | 24101.40 | 92766.98 |          |
|         | 1997 | 73.19 | 64.15 | 9.05  | 9772.26  | 304.44  | 5.79 | 100.00 | 15.52 | 84.48 | 4.89 | 0.90 | 55.17 | 21.47 | 1.69 | 97.30 | 98.30 | 26444.91 | 92792.87 |          |
|         | 1998 | 73.42 | 64.34 | 9.08  | 10111.22 | 369.31  | 6.59 | 100.00 | 12.96 | 87.04 | 5.73 | 0.85 | 55.31 | 22.08 | 1.45 | 97.30 | 98.30 | 27432.06 | 92863.28 |          |
|         | 1999 | 73.64 | 64.52 | 9.11  | 9900.06  | 374.15  | 7.24 | 100.00 | 12.66 | 87.34 | 6.33 | 0.92 | 55.45 | 22.65 | 1.38 | 97.30 | 98.30 | 27203.21 | 92942.69 |          |
|         | 2000 | 73.91 | 64.77 | 9.14  | 10570.14 | 371.22  | 7.66 | 100.00 | 13.86 | 86.14 | 6.60 | 1.06 | 55.59 | 23.19 | 1.39 | 97.30 | 98.30 | 27312.05 | 93014.15 |          |
|         | 2001 | 74.18 | 64.95 | 9.22  | 10898.69 | 387.77  | 7.16 | 86.05  | 14.39 | 83.28 | 5.96 | 1.20 | 55.73 | 23.88 | 1.46 | 97.30 | 98.30 | 27165.05 | 93037.29 |          |
|         | 2002 | 74.44 | 65.15 | 9.29  | 11470.48 | 388.08  | 6.19 | 93.38  | 18.63 | 80.05 | 4.96 | 1.24 | 55.88 | 24.53 | 1.42 | 97.30 | 98.40 | 28301.73 | 93087.79 |          |
|         | 2003 | 74.70 | 65.35 | 9.35  | 12108.00 | 512.02  | 6.35 | 95.92  | 16.68 | 82.61 | 5.24 | 1.10 | 56.04 | 25.11 | 1.41 | 97.30 | 98.50 | 30011.88 | 93123.68 |          |
|         | 2004 | 74.93 | 65.52 | 9.41  | 12605.19 | 633.90  | 6.56 | 95.92  | 18.17 | 81.06 | 5.31 | 1.24 | 56.22 | 25.52 | 1.43 | 97.20 | 98.60 | 29691.51 | 93141.86 |          |
|         | 2005 | 75.14 | 65.70 | 9.44  | 13121.18 | 726.52  | 6.89 | 95.92  | 13.41 | 86.02 | 5.93 | 0.96 | 56.41 | 25.73 | 1.50 | 97.20 | 98.70 | 29863.54 | 93171.05 |          |
|         | 2006 | 75.36 | 65.87 | 9.49  | 13755.24 | 813.87  | 6.95 | 95.92  | 13.36 | 86.07 | 5.98 | 0.97 | 56.61 | 25.93 | 1.47 | 97.20 | 98.80 | 30290.07 | 93157.18 |          |
|         | 2007 | 75.58 | 66.00 | 9.58  | 14476.68 | 1038.92 | 7.44 | 95.92  | 87.03 | 87.03 | 6.48 | 0.97 | 56.82 | 25.97 | 1.48 | 97.20 | 98.90 | 33301.10 | 93152.78 |          |
|         | 2008 | 75.84 | 66.19 | 9.65  | 14778.91 | 1265.14 | 7.70 | 95.92  | 14.51 | 84.87 | 6.54 | 1.17 | 57.05 | 25.94 | 1.55 | 97.10 | 99.00 | 32938.06 | 93147.76 |          |
|         | 2009 | 76.09 | 66.37 | 9.72  | 13704.44 | 1193.49 | 8.18 | 95.92  | 13.73 | 85.69 | 7.01 | 1.17 | 57.29 | 25.99 | 1.58 | 97.10 | 99.10 | 31461.04 | 93161.81 |          |
|         | 2010 | 76.35 | 66.61 | 9.75  | 13505.75 | 1143.85 | 8.25 | 95.92  | 13.76 | 85.66 | 7.06 | 1.18 | 57.54 | 26.21 | 1.55 | 97.10 | 99.20 | 31172.65 | 93209.31 |          |
|         | 2011 | 76.63 | 66.77 | 9.85  | 13899.29 | 1131.67 | 7.80 | 60.95  | 12.06 | 80.21 | 6.26 | 1.54 | 57.80 | 26.51 | 1.48 | 97.10 | 99.30 | 30453.51 | 93214.04 |          |
|         | 2012 | 76.88 | 66.98 | 9.90  | 13636.87 | 1029.52 | 7.80 | 62.38  | 11.47 | 81.61 | 6.36 | 1.43 | 58.07 | 26.90 | 1.51 | 97.10 | 99.40 | 30421.05 | 93228.09 |          |
|         | 2013 | 77.12 | 67.16 | 9.96  | 13529.41 | 1060.83 | 7.83 | 61.80  | 11.25 | 81.79 | 6.40 | 1.43 | 58.36 | 27.39 | 1.46 | 97.10 | 99.50 | -        | 93249.26 |          |
|         | 2014 | 77.30 | 67.30 | 10.00 | 13517.83 | 1050.33 | 7.80 | 61.80  | 11.21 | 81.87 | 6.39 | 1.41 | 58.66 | 27.92 | 1.46 | 97.10 | 99.60 | -        | 93280.18 |          |
|         | 2015 | 77.35 | 67.35 | 10.00 | 13935.95 | -       | -    | -      | -     | -     | -    | -    | 58.96 | 28.49 | 1.46 | 97.00 | 99.60 | -        | 93315.07 |          |
|         | 2016 | 77.36 | 67.42 | 9.94  | 14465.13 | -       | -    | -      | -     | -     | -    | -    | 59.28 | 29.26 | -    | -     | -     | -        | 93360.16 |          |
|         | 2017 | 78.53 | 67.42 | 11.11 | -        | -       | -    | -      | -     | -     | -    | -    | -     | -     | -    | -     | -     | -        | -        |          |
| Cuba    | 1995 | 75.15 | 66.03 | 9.12  | 2844.12  | 111.84  | 5.15 | 100.00 | 9.77  | 90.23 | 4.65 | 0.50 | 74.28 | 13.51 | 1.64 | 84.10 | 89.60 | 46584.98 | 91464.31 |          |
|         | 1996 | 75.40 | 66.27 | 9.14  | 3051.68  | 119.36  | 5.26 | 100.00 | 9.51  | 90.49 | 4.76 | 0.50 | 74.43 | 13.68 | 1.64 | 84.60 | 89.70 | 48578.11 | 91532.60 |          |
|         | 1997 | 75.64 | 66.48 | 9.16  | 3121.54  | 126.06  | 5.50 | 100.00 | 9.32  | 90.68 | 4.99 | 0.51 | 74.62 | 13.85 | 1.63 | 85.20 | 89.80 | 49638.53 | 91574.79 |          |
|         | 1998 | 75.94 | 66.74 | 9.20  | 3112.35  | 133.59  | 5.77 | 100.00 | 9.43  | 90.57 | 5.23 | 0.54 | 74.86 | 14.01 | 1.63 | 85.70 | 89.90 | 46514.68 | 91619.83 |          |

|        |       |       |       |         |          |         |        |       |       |       |      |       |       |       |       |        |          |          |          |
|--------|-------|-------|-------|---------|----------|---------|--------|-------|-------|-------|------|-------|-------|-------|-------|--------|----------|----------|----------|
| 1999   | 76.22 | 66.99 | 9.23  | 3291.30 | 152.60   | 6.00    | 100.00 | 8.81  | 91.19 | 5.47  | 0.53 | 75.09 | 14.19 | 1.63  | 86.20 | 90.20  | 45832.24 | 91688.68 |          |
| 2000   | 76.52 | 67.26 | 9.27  | 3473.24 | 166.33   | 6.07    | 100.00 | 9.17  | 90.83 | 5.51  | 0.56 | 75.32 | 14.39 | 1.62  | 86.70 | 90.60  | 46257.54 | 91777.01 |          |
| 2001   | 76.81 | 67.49 | 9.32  | 3572.40 | 177.88   | 6.27    | 100.00 | 9.56  | 90.44 | 5.67  | 0.60 | 75.56 | 14.63 | 1.61  | 87.20 | 90.90  | 44507.96 | 91847.91 |          |
| 2002   | 77.06 | 67.70 | 9.36  | 3613.14 | 194.80   | 6.50    | 100.00 | 11.86 | 88.14 | 5.72  | 0.77 | 75.79 | 14.89 | 1.59  | 87.70 | 91.20  | 48831.04 | 91946.57 |          |
| 2003   | 77.26 | 67.86 | 9.39  | 3741.21 | 201.88   | 6.31    | 100.00 | 10.55 | 89.45 | 5.65  | 0.67 | 75.95 | 15.15 | 1.58  | 88.30 | 91.50  | 48493.24 | 92063.31 |          |
| 2004   | 77.41 | 67.99 | 9.41  | 3949.35 | 208.58   | 6.14    | 100.00 | 10.91 | 89.09 | 5.47  | 0.67 | 76.04 | 15.43 | 1.58  | 88.70 | 91.80  | 48579.22 | 92191.23 |          |
| 2005   | 77.57 | 68.14 | 9.42  | 4385.00 | 356.29   | 9.39    | 100.00 | 6.92  | 93.08 | 8.74  | 0.65 | 76.13 | 15.73 | 1.57  | 89.20 | 92.10  | 45763.45 | 92338.24 |          |
| 2006   | 77.76 | 68.31 | 9.45  | 4908.88 | 359.99   | 7.67    | 100.00 | 7.69  | 92.31 | 7.08  | 0.59 | 76.23 | 16.12 | 1.57  | 89.70 | 92.40  | 45505.48 | 92455.41 |          |
| 2007   | 77.93 | 68.42 | 9.51  | 5261.90 | 586.91   | 10.42   | 100.00 | 94.85 | 94.85 | 9.88  | 0.54 | 76.32 | 16.53 | 1.58  | 90.20 | 92.70  | 44012.99 | 92537.41 |          |
| 2008   | 78.08 | 68.53 | 9.55  | 5475.58 | 584.10   | 10.79   | 100.00 | 4.63  | 95.37 | 10.29 | 0.50 | 76.41 | 16.95 | 1.60  | 90.70 | 92.90  | 48557.44 | 92583.18 |          |
| 2009   | 78.22 | 68.63 | 9.59  | 5550.71 | 650.55   | 11.78   | 100.00 | 4.22  | 95.78 | 11.28 | 0.50 | 76.51 | 17.38 | 1.62  | 91.20 | 93.20  | 50545.40 | 92610.60 |          |
| 2010   | 78.34 | 68.75 | 9.59  | 5676.14 | 583.37   | 10.19   | 100.00 | 4.81  | 95.19 | 9.70  | 0.49 | 76.60 | 17.80 | 1.64  | 91.70 | 93.50  | 49782.53 | 92660.33 |          |
| 2011   | 78.49 | 68.83 | 9.66  | 5824.10 | 645.63   | 10.60   | 100.00 | 4.96  | 95.04 | 10.07 | 0.53 | 76.69 | 18.18 | 1.66  | 92.20 | 93.80  | 51170.75 | 92671.55 |          |
| 2012   | 78.56 | 68.89 | 9.67  | 5985.20 | 554.72   | 8.59    | 100.00 | 5.85  | 94.15 | 8.09  | 0.50 | 76.78 | 18.55 | 1.69  | 92.70 | 94.10  | 52418.46 | 92708.33 |          |
| 2013   | 78.64 | 68.95 | 9.69  | 6133.47 | 656.70   | 9.48    | 100.00 | 5.48  | 94.52 | 8.96  | 0.52 | 76.87 | 18.93 | 1.70  | 93.10 | 94.30  | -        | 92757.94 |          |
| 2014   | 78.72 | 69.01 | 9.71  | 6182.77 | 816.62   | 11.06   | 100.00 | 4.39  | 95.61 | 10.57 | 0.49 | 76.97 | 19.38 | 1.71  | 93.20 | 94.60  | -        | 92821.59 |          |
| 2015   | 78.83 | 69.09 | 9.74  | 6444.98 | -        | -       | -      | -     | -     | -     | -    | 77.07 | 19.92 | 1.72  | 93.20 | 94.90  | -        | 92920.53 |          |
| 2016   | 78.91 | 69.19 | 9.73  | -       | -        | -       | -      | -     | -     | -     | -    | 77.18 | 20.55 | -     | -     | -      | -        | 93022.67 |          |
| 2017   | 78.42 | 69.15 | 9.27  | -       | -        | -       | -      | -     | -     | -     | -    | -     | -     | -     | -     | -      | -        | -        |          |
| Cyprus | 1995  | 75.70 | 66.25 | 9.45    | 24030.24 | 680.67  | 4.74   | 98.61 | 63.27 | 35.84 | 1.70 | 3.04  | 68.04 | 15.45 | 2.12  | 100.00 | 100.00   | 6594.25  | 91036.63 |
|        | 1996  | 76.10 | 66.56 | 9.54    | 23965.53 | 744.09  | 5.21   | 98.42 | 64.86 | 34.10 | 1.77 | 3.43  | 68.16 | 15.40 | 2.04  | 100.00 | 100.00   | 6931.65  | 91162.74 |
|        | 1997  | 76.22 | 66.66 | 9.56    | 24234.42 | 728.27  | 5.53   | 98.20 | 63.60 | 35.23 | 1.95 | 3.58  | 68.28 | 15.33 | 1.95  | 100.00 | 100.00   | 7004.33  | 91317.48 |
|        | 1998  | 76.37 | 66.78 | 9.58    | 25192.43 | 775.91  | 5.58   | 98.16 | 57.05 | 41.88 | 2.34 | 3.25  | 68.41 | 15.27 | 1.86  | 100.00 | 100.00   | 7355.14  | 91475.11 |
|        | 1999  | 76.62 | 66.98 | 9.64    | 26115.00 | 787.91  | 5.60   | 95.16 | 54.56 | 42.66 | 2.39 | 3.21  | 68.53 | 15.22 | 1.78  | 100.00 | 100.00   | 7572.95  | 91620.88 |
|        | 2000  | 76.82 | 67.15 | 9.67    | 27317.80 | 753.35  | 5.77   | 95.74 | 55.86 | 41.65 | 2.40 | 3.37  | 68.65 | 15.18 | 1.72  | 100.00 | 100.00   | 7952.75  | 91802.28 |
|        | 2001  | 77.25 | 67.48 | 9.76    | 27998.02 | 783.71  | 5.78   | 95.73 | 55.19 | 42.36 | 2.45 | 3.33  | 68.77 | 15.18 | 1.66  | 100.00 | 100.00   | 7790.87  | 91942.32 |
|        | 2002  | 77.46 | 67.67 | 9.79    | 28619.83 | 894.66  | 6.12   | 95.91 | 52.77 | 44.98 | 2.75 | 3.37  | 68.69 | 15.20 | 1.61  | 100.00 | 100.00   | 8040.81  | 92076.12 |
|        | 2003  | 77.74 | 67.90 | 9.84    | 28974.13 | 1260.41 | 6.83   | 79.14 | 43.43 | 45.13 | 3.08 | 3.75  | 68.55 | 15.28 | 1.58  | 100.00 | 100.00   | 8896.65  | 92176.42 |
|        | 2004  | 77.91 | 68.04 | 9.86    | 29895.75 | 1384.67 | 6.42   | 82.78 | 46.49 | 43.84 | 2.81 | 3.60  | 68.41 | 15.41 | 1.55  | 100.00 | 100.00   | 8725.30  | 92271.50 |

|      |       |       |       |          |         |      |       |       |       |      |      |       |       |      |        |        |         |          |
|------|-------|-------|-------|----------|---------|------|-------|-------|-------|------|------|-------|-------|------|--------|--------|---------|----------|
| 2005 | 78.03 | 68.16 | 9.87  | 30565.78 | 1448.75 | 6.37 | 80.83 | 47.04 | 41.81 | 2.66 | 3.71 | 68.27 | 15.55 | 1.52 | 100.00 | 100.00 | 8911.67 | 92363.09 |
| 2006 | 78.66 | 68.66 | 10.00 | 31415.82 | 1529.21 | 6.28 | 80.99 | 46.63 | 42.43 | 2.66 | 3.61 | 68.13 | 15.65 | 1.50 | 100.00 | 100.00 | 8761.86 | 92411.95 |
| 2007 | 78.93 | 68.86 | 10.07 | 32236.59 | 1734.48 | 6.05 | 83.24 | 42.59 | 42.59 | 2.58 | 3.47 | 67.98 | 15.73 | 1.48 | 100.00 | 100.00 | 9077.28 | 92486.53 |
| 2008 | 79.24 | 69.11 | 10.13 | 32651.91 | 2241.27 | 6.89 | 84.75 | 49.70 | 41.36 | 2.85 | 4.04 | 67.84 | 15.82 | 1.46 | 100.00 | 100.00 | 9165.95 | 92545.22 |
| 2009 | 79.55 | 69.35 | 10.20 | 31223.62 | 2185.84 | 7.40 | 87.43 | 48.32 | 44.74 | 3.31 | 4.09 | 67.70 | 15.95 | 1.44 | 100.00 | 100.00 | -       | 92585.68 |
| 2010 | 79.87 | 69.62 | 10.26 | 30818.46 | 2038.20 | 7.23 | 86.89 | 45.37 | 47.35 | 3.43 | 3.78 | 67.55 | 16.14 | 1.42 | 100.00 | 100.00 | -       | 92645.09 |
| 2011 | 80.23 | 69.89 | 10.33 | 30138.59 | 2235.67 | 7.54 | 84.57 | 44.84 | 46.54 | 3.51 | 4.00 | 67.41 | 16.50 | 1.41 | 100.00 | 100.00 | 7652.33 | 92690.19 |
| 2012 | 80.58 | 70.17 | 10.40 | 28745.54 | 1964.82 | 7.44 | 87.67 | 47.04 | 45.86 | 3.41 | 3.99 | 67.26 | 16.90 | 1.39 | 100.00 | 100.00 | 7431.19 | 92692.61 |
| 2013 | 80.64 | 70.25 | 10.39 | 27097.31 | 1889.87 | 7.46 | 88.86 | 46.97 | 46.53 | 3.47 | 3.94 | 67.13 | 17.33 | 1.37 | 100.00 | 100.00 | -       | 92722.66 |
| 2014 | 80.51 | 70.18 | 10.34 | 26977.63 | 1819.11 | 7.37 | 88.93 | 48.71 | 45.23 | 3.33 | 4.04 | 67.02 | 17.80 | 1.36 | 100.00 | 100.00 | -       | 92757.92 |
| 2015 | 80.48 | 70.17 | 10.31 | 27587.28 | -       | -    | -     | -     | -     | -    | -    | 66.92 | 18.26 | 1.35 | 100.00 | 100.00 | -       | 92794.67 |
| 2016 | 80.48 | 70.20 | 10.28 | 28325.44 | -       | -    | -     | -     | -     | -    | -    | 66.84 | 18.75 | -    | -      | -      | -       | 92827.26 |
| 2017 | 81.72 | 70.68 | 11.04 | -        | -       | -    | -     | -     | -     | -    | -    | -     | -     | -    | -      | -      | -       | -        |

|          |      |       |       |       |          |         |      |        |       |       |      |      |       |       |      |       |        |           |          |
|----------|------|-------|-------|-------|----------|---------|------|--------|-------|-------|------|------|-------|-------|------|-------|--------|-----------|----------|
| Czech    | 1995 | 73.36 | 63.78 | 9.58  | 13462.99 | 374.35  | 6.69 | 100.00 | 9.11  | 90.89 | 6.08 | 0.61 | 74.64 | 19.40 | 1.28 | 99.10 | 99.80  | 150508.56 | 91612.32 |
| Republic | 1996 | 73.78 | 64.10 | 9.67  | 14047.84 | 403.12  | 6.41 | 100.00 | 9.33  | 90.67 | 5.81 | 0.60 | 74.51 | 19.55 | 1.18 | 99.10 | 99.80  | 154942.06 | 91693.35 |
|          | 1997 | 74.13 | 64.39 | 9.73  | 13979.36 | 369.23  | 6.40 | 100.00 | 9.71  | 90.29 | 5.78 | 0.62 | 74.38 | 19.69 | 1.17 | 99.10 | 99.80  | 149454.44 | 91767.33 |
|          | 1998 | 74.47 | 64.69 | 9.79  | 13946.62 | 397.98  | 6.42 | 100.00 | 9.57  | 90.43 | 5.80 | 0.61 | 74.25 | 19.80 | 1.16 | 99.10 | 99.80  | 146940.02 | 91831.93 |
|          | 1999 | 74.74 | 64.92 | 9.82  | 14160.91 | 383.60  | 6.35 | 100.00 | 9.52  | 90.48 | 5.74 | 0.60 | 74.12 | 19.84 | 1.13 | 99.10 | 99.80  | 142384.43 | 91890.21 |
|          | 2000 | 75.03 | 65.22 | 9.81  | 14806.58 | 361.23  | 6.31 | 100.00 | 9.68  | 90.32 | 5.70 | 0.61 | 73.99 | 19.78 | 1.15 | 99.10 | 99.80  | 162021.19 | 91954.37 |
|          | 2001 | 75.27 | 65.33 | 9.95  | 15294.63 | 404.06  | 6.42 | 100.00 | 10.23 | 89.77 | 5.76 | 0.66 | 73.88 | 19.80 | 1.15 | 99.10 | 99.80  | 157672.17 | 92006.84 |
|          | 2002 | 75.42 | 65.41 | 10.01 | 15577.39 | 522.58  | 6.80 | 100.00 | 9.53  | 90.47 | 6.15 | 0.65 | 73.81 | 19.74 | 1.17 | 99.10 | 99.80  | 152372.42 | 92062.89 |
|          | 2003 | 75.64 | 65.54 | 10.09 | 16143.26 | 666.81  | 7.13 | 97.67  | 9.96  | 89.80 | 6.40 | 0.73 | 73.74 | 19.66 | 1.18 | 99.10 | 99.80  | 157836.12 | 92118.89 |
|          | 2004 | 75.92 | 65.71 | 10.20 | 16930.19 | 771.78  | 6.90 | 95.42  | 10.35 | 89.15 | 6.15 | 0.75 | 73.67 | 19.64 | 1.23 | 99.10 | 99.80  | 152079.89 | 92166.54 |
|          | 2005 | 76.23 | 65.96 | 10.27 | 18011.39 | 884.36  | 6.93 | 84.29  | 10.70 | 87.31 | 6.05 | 0.88 | 73.60 | 19.72 | 1.29 | 99.10 | 99.90  | 147551.44 | 92208.45 |
|          | 2006 | 76.55 | 66.19 | 10.36 | 19193.75 | 971.51  | 6.69 | 85.11  | 11.29 | 86.73 | 5.81 | 0.89 | 73.53 | 19.99 | 1.34 | 99.10 | 99.90  | 147768.30 | 92191.43 |
|          | 2007 | 76.85 | 66.34 | 10.52 | 20151.18 | 1147.98 | 6.52 | 89.03  | 85.19 | 85.19 | 5.56 | 0.97 | 73.46 | 20.34 | 1.45 | 99.10 | 99.90  | 149838.95 | 92166.03 |
|          | 2008 | 77.13 | 66.52 | 10.60 | 20520.78 | 1486.18 | 6.82 | 90.15  | 15.73 | 82.55 | 5.63 | 1.19 | 73.39 | 20.78 | 1.51 | 99.10 | 99.90  | 144072.58 | 92150.24 |
|          | 2009 | 77.27 | 66.62 | 10.65 | 19424.27 | 1483.94 | 7.85 | 89.96  | 14.63 | 83.74 | 6.57 | 1.28 | 73.32 | 21.31 | 1.51 | 99.10 | 99.90  | 137877.29 | 92170.92 |
|          | 2010 | 77.50 | 66.84 | 10.66 | 19808.07 | 1410.04 | 7.43 | 91.50  | 14.86 | 83.76 | 6.22 | 1.21 | 73.26 | 21.95 | 1.51 | 99.10 | 100.00 | 145706.92 | 92207.20 |

|       |       |       |       |          |         |      |       |       |       |      |      |       |       |      |       |        |           |          |
|-------|-------|-------|-------|----------|---------|------|-------|-------|-------|------|------|-------|-------|------|-------|--------|-----------|----------|
| 2011  | 77.77 | 67.00 | 10.78 | 20118.59 | 1545.57 | 7.50 | 93.20 | 14.74 | 84.18 | 6.31 | 1.19 | 73.19 | 22.82 | 1.43 | 99.10 | 100.00 | 144613.25 | 92215.11 |
| 2012  | 78.03 | 67.20 | 10.82 | 19929.76 | 1411.48 | 7.55 | 94.06 | 15.03 | 84.02 | 6.34 | 1.21 | 73.12 | 23.78 | 1.45 | 99.10 | 100.00 | 138957.42 | 92224.96 |
| 2013  | 78.30 | 67.42 | 10.88 | 19826.79 | 1412.79 | 7.49 | 92.70 | 14.53 | 84.33 | 6.31 | 1.17 | 73.06 | 24.82 | 1.46 | 99.10 | 100.00 | -         | 92219.18 |
| 2014  | 78.64 | 67.67 | 10.96 | 20343.68 | 1378.52 | 7.41 | 92.65 | 14.33 | 84.54 | 6.26 | 1.15 | 73.02 | 25.87 | 1.53 | 99.10 | 100.00 | -         | 92219.58 |
| 2015  | 78.96 | 67.92 | 11.04 | 21381.70 | -       | -    | -     | -     | -     | -    | -    | 72.99 | 26.91 | 1.53 | 99.10 | 100.00 | -         | 92235.18 |
| 2016  | 79.10 | 68.10 | 11.00 | 21903.85 | -       | -    | -     | -     | -     | -    | -    | 72.98 | 27.98 | -    | -     | -      | -         | 92262.67 |
| 2017  | 79.17 | 67.40 | 11.76 | -        | -       | -    | -     | -     | -     | -    | -    | -     | -     | -    | -     | -      | -         | -        |
| Korea | 1995  | 64.32 | 57.20 | 7.12     | -       | -    | -     | -     | -     | -    | -    | 59.02 | 7.50  | 2.12 | 53.30 | 100.00 | 111920.31 | 84165.22 |
|       | 1996  | 64.27 | 57.17 | 7.10     | -       | -    | -     | -     | -     | -    | -    | 59.10 | 7.71  | 2.08 | 53.30 | 100.00 | 100618.40 | 84285.04 |
|       | 1997  | 64.19 | 57.10 | 7.09     | -       | -    | -     | -     | -     | -    | -    | 59.18 | 7.91  | 2.04 | 55.20 | 99.90  | 98661.43  | 84442.91 |
|       | 1998  | 64.07 | 57.00 | 7.08     | -       | -    | -     | -     | -     | -    | -    | 59.26 | 8.11  | 2.01 | 57.10 | 99.90  | 84375.45  | 84622.97 |
|       | 1999  | 63.95 | 56.89 | 7.06     | -       | -    | -     | -     | -     | -    | -    | 59.33 | 8.35  | 2.00 | 59.00 | 99.90  | 89468.29  | 84837.56 |
|       | 2000  | 63.83 | 56.76 | 7.06     | -       | -    | -     | -     | -     | -    | -    | 59.41 | 8.65  | 1.99 | 60.90 | 99.90  | 97813.67  | 85082.40 |
|       | 2001  | 63.69 | 56.70 | 6.99     | -       | -    | -     | -     | -     | -    | -    | 59.49 | 9.08  | 1.99 | 62.80 | 99.90  | 101904.13 | 85241.96 |
|       | 2002  | 63.59 | 56.64 | 6.95     | -       | -    | -     | -     | -     | -    | -    | 59.57 | 9.54  | 1.99 | 64.70 | 99.90  | 96022.37  | 85436.34 |
|       | 2003  | 69.97 | 62.03 | 7.93     | -       | -    | -     | -     | -     | -    | -    | 59.65 | 10.02 | 2.00 | 66.60 | 99.80  | 98123.03  | 85651.49 |
|       | 2004  | 69.94 | 62.05 | 7.89     | -       | -    | -     | -     | -     | -    | -    | 59.73 | 10.48 | 2.00 | 68.50 | 99.80  | 101210.57 | 85870.69 |
|       | 2005  | 69.96 | 62.07 | 7.88     | -       | -    | -     | -     | -     | -    | -    | 59.81 | 10.91 | 2.00 | 70.40 | 99.80  | 106557.19 | 86128.66 |
|       | 2006  | 69.99 | 62.12 | 7.87     | -       | -    | -     | -     | -     | -    | -    | 59.88 | 11.37 | 2.00 | 72.30 | 99.80  | 106807.17 | 86327.07 |
|       | 2007  | 70.00 | 62.13 | 7.87     | -       | -    | -     | -     | -     | -    | -    | 59.96 | 11.78 | 2.00 | 74.20 | 99.80  | 92054.15  | 86522.67 |
|       | 2008  | 70.13 | 62.25 | 7.88     | -       | -    | -     | -     | -     | -    | -    | 60.04 | 12.14 | 1.99 | 76.10 | 99.70  | 99381.17  | 86707.47 |
|       | 2009  | 70.18 | 62.31 | 7.87     | -       | -    | -     | -     | -     | -    | -    | 60.12 | 12.47 | 1.99 | 78.00 | 99.70  | 99920.38  | 86876.25 |
|       | 2010  | 70.26 | 62.39 | 7.87     | -       | -    | -     | -     | -     | -    | -    | 60.21 | 12.76 | 1.98 | 79.90 | 99.70  | 104116.60 | 87042.91 |
|       | 2011  | 70.34 | 62.48 | 7.86     | -       | -    | -     | -     | -     | -    | -    | 60.32 | 13.15 | 1.97 | 81.80 | 99.70  | 107165.32 | 87153.24 |
|       | 2012  | 70.43 | 62.58 | 7.85     | -       | -    | -     | -     | -     | -    | -    | 60.44 | 13.54 | 1.96 | 81.80 | 99.70  | 109894.96 | 87291.53 |
|       | 2013  | 70.54 | 62.69 | 7.85     | -       | -    | -     | -     | -     | -    | -    | 60.57 | 13.86 | 1.95 | 81.90 | 99.70  | -         | 87413.71 |
|       | 2014  | 70.65 | 62.80 | 7.85     | -       | -    | -     | -     | -     | -    | -    | 60.72 | 14.03 | 1.93 | 81.90 | 99.70  | -         | 87549.32 |
|       | 2015  | 70.76 | 62.91 | 7.85     | -       | -    | -     | -     | -     | -    | -    | 60.88 | 14.01 | 1.92 | 81.90 | 99.70  | -         | 87676.10 |
|       | 2016  | 70.85 | 63.01 | 7.84     | -       | -    | -     | -     | -     | -    | -    | 61.05 | 13.88 | -    | -     | -      | -         | 87806.79 |

|          | 2017 | -     | -     | -     | -        | -       | -     | -     | -     | -     | -    | -    | -     | -     | -    | -     | -      | -        | -        |
|----------|------|-------|-------|-------|----------|---------|-------|-------|-------|-------|------|------|-------|-------|------|-------|--------|----------|----------|
| Denmark  | 1995 | 75.58 | 65.81 | 9.77  | 49122.88 | 2835.43 | 8.13  | 93.26 | 16.30 | 82.52 | 6.71 | 1.42 | 84.98 | 22.61 | 1.80 | 99.60 | 100.00 | 79490.35 | 92416.50 |
|          | 1996 | 75.90 | 66.09 | 9.81  | 50262.23 | 2884.22 | 8.21  | 92.31 | 16.23 | 82.42 | 6.77 | 1.44 | 85.01 | 22.57 | 1.75 | 99.60 | 100.00 | 92887.16 | 92381.61 |
|          | 1997 | 76.22 | 66.38 | 9.84  | 51685.98 | 2633.58 | 8.15  | 92.13 | 16.33 | 82.28 | 6.71 | 1.44 | 85.03 | 22.51 | 1.75 | 99.60 | 100.00 | 83193.33 | 92360.46 |
|          | 1998 | 76.48 | 66.61 | 9.86  | 52640.94 | 2675.35 | 8.16  | 91.26 | 16.35 | 82.08 | 6.69 | 1.46 | 85.06 | 22.44 | 1.72 | 99.60 | 100.00 | 76245.00 | 92346.12 |
|          | 1999 | 76.60 | 66.73 | 9.86  | 54013.78 | 2931.36 | 8.95  | 90.97 | 14.60 | 83.95 | 7.52 | 1.44 | 85.09 | 22.36 | 1.73 | 99.60 | 100.00 | 72949.81 | 92344.20 |
|          | 2000 | 76.95 | 67.02 | 9.93  | 55850.64 | 2612.69 | 8.70  | 90.91 | 14.67 | 83.86 | 7.30 | 1.40 | 85.10 | 22.28 | 1.77 | 99.60 | 100.00 | 68553.55 | 92347.49 |
|          | 2001 | 77.15 | 67.18 | 9.97  | 56108.96 | 2730.15 | 9.10  | 91.09 | 14.41 | 84.18 | 7.66 | 1.44 | 85.15 | 22.36 | 1.74 | 99.60 | 100.00 | 70080.08 | 92353.96 |
|          | 2002 | 77.31 | 67.29 | 10.02 | 56190.81 | 3023.12 | 9.33  | 90.95 | 14.11 | 84.49 | 7.89 | 1.45 | 85.25 | 22.43 | 1.72 | 99.60 | 100.00 | 69387.75 | 92384.64 |
|          | 2003 | 77.55 | 67.46 | 10.09 | 56256.77 | 3756.11 | 9.51  | 90.47 | 13.98 | 84.55 | 8.04 | 1.47 | 85.36 | 22.53 | 1.76 | 99.60 | 100.00 | 75002.53 | 92415.51 |
|          | 2004 | 77.81 | 67.65 | 10.16 | 57608.73 | 4387.09 | 9.67  | 90.40 | 14.22 | 84.27 | 8.15 | 1.52 | 85.57 | 22.68 | 1.78 | 99.60 | 100.00 | 68854.76 | 92445.19 |
|          | 2005 | 78.11 | 67.85 | 10.26 | 58792.67 | 4652.52 | 9.77  | 90.49 | 14.05 | 84.48 | 8.25 | 1.52 | 85.86 | 22.92 | 1.80 | 99.60 | 100.00 | 64816.69 | 92497.66 |
|          | 2006 | 78.36 | 68.04 | 10.32 | 60892.77 | 5017.51 | 9.92  | 90.06 | 13.84 | 84.64 | 8.40 | 1.52 | 86.10 | 23.32 | 1.85 | 99.60 | 100.00 | 72755.34 | 92508.13 |
|          | 2007 | 78.64 | 68.24 | 10.40 | 61174.55 | 5709.97 | 9.99  | 89.38 | 84.40 | 84.40 | 8.43 | 1.56 | 86.29 | 23.78 | 1.84 | 99.60 | 100.00 | 67993.20 | 92518.74 |
|          | 2008 | 78.94 | 68.46 | 10.48 | 60504.78 | 6395.90 | 10.18 | 88.35 | 13.55 | 84.66 | 8.62 | 1.56 | 86.49 | 24.30 | 1.89 | 99.60 | 100.00 | 65167.03 | 92532.79 |
|          | 2009 | 79.20 | 68.65 | 10.55 | 57229.05 | 6464.58 | 11.47 | 88.05 | 13.17 | 85.04 | 9.76 | 1.72 | 86.65 | 24.87 | 1.84 | 99.60 | 100.00 | 63012.02 | 92557.45 |
|          | 2010 | 79.51 | 68.86 | 10.65 | 58041.41 | 6266.81 | 11.08 | 88.72 | 13.19 | 85.13 | 9.43 | 1.65 | 86.80 | 25.49 | 1.87 | 99.60 | 100.00 | 63679.09 | 92609.46 |
|          | 2011 | 79.86 | 69.14 | 10.72 | 58575.62 | 6522.13 | 10.87 | 87.23 | 12.82 | 85.30 | 9.27 | 1.60 | 86.96 | 26.14 | 1.75 | 99.60 | 100.00 | 58416.04 | 92668.00 |
|          | 2012 | 80.16 | 69.37 | 10.79 | 58487.79 | 6203.77 | 10.98 | 87.35 | 12.44 | 85.76 | 9.42 | 1.56 | 87.14 | 26.93 | 1.73 | 99.60 | 100.00 | 53703.22 | 92748.00 |
|          | 2013 | 80.41 | 69.56 | 10.85 | 58788.08 | 6637.66 | 11.25 | 87.67 | 12.89 | 85.30 | 9.59 | 1.65 | 87.32 | 27.87 | 1.67 | 99.60 | 100.00 | -        | 92815.82 |
|          | 2014 | 80.68 | 69.76 | 10.91 | 59437.93 | 6463.24 | 10.80 | 87.69 | 13.36 | 84.76 | 9.16 | 1.65 | 87.50 | 28.84 | 1.69 | 99.60 | 100.00 | -        | 92883.46 |
|          | 2015 | 80.75 | 69.83 | 10.93 | 59967.74 | -       | -     | -     | -     | -     | -    | -    | 87.68 | 29.71 | 1.69 | 99.60 | 100.00 | -        | 92941.51 |
|          | 2016 | 80.82 | 69.88 | 10.95 | 60637.34 | -       | -     | -     | -     | -     | -    | -    | 87.85 | 30.37 | -    | -     | -      | -        | 92992.69 |
|          | 2017 | 80.76 | 69.63 | 11.13 | -        | -       | -     | -     | -     | -     | -    | -    | -     | -     | -    | -     | -      | -        | -        |
| Djibouti | 1995 | 61.28 | 53.88 | 7.41  | 1249.15  | 30.46   | 3.95  | 98.66 | 39.12 | 60.34 | 2.38 | 1.57 | 76.30 | 5.19  | 5.35 | 65.10 | 78.90  | 1914.42  | 88254.10 |
|          | 1996 | 61.31 | 53.91 | 7.40  | 1173.01  | 29.29   | 3.97  | 98.69 | 41.09 | 58.37 | 2.32 | 1.65 | 76.35 | 5.23  | 5.15 | 64.00 | 79.60  | 1915.84  | 88271.73 |
|          | 1997 | 61.17 | 53.79 | 7.38  | 1133.83  | 32.94   | 4.60  | 98.87 | 37.96 | 61.61 | 2.83 | 1.77 | 76.39 | 5.27  | 4.96 | 62.90 | 80.20  | 2018.25  | 88294.15 |
|          | 1998 | 61.29 | 53.89 | 7.40  | 1102.18  | 38.88   | 5.45  | 98.77 | 33.40 | 66.18 | 3.61 | 1.84 | 76.44 | 5.31  | 4.78 | 61.70 | 80.90  | 1994.59  | 88330.23 |
|          | 1999 | 61.25 | 53.84 | 7.41  | 1094.85  | 46.91   | 6.22  | 98.82 | 28.78 | 70.87 | 4.41 | 1.81 | 76.49 | 5.35  | 4.62 | 60.60 | 81.60  | 1971.94  | 88383.62 |

|      |       |       |      |         |        |       |       |       |       |      |      |       |      |      |       |       |         |          |
|------|-------|-------|------|---------|--------|-------|-------|-------|-------|------|------|-------|------|------|-------|-------|---------|----------|
| 2000 | 61.30 | 53.84 | 7.45 | 1072.62 | 44.27  | 5.75  | 98.53 | 31.74 | 67.79 | 3.90 | 1.85 | 76.53 | 5.37 | 4.48 | 59.50 | 82.30 | 1969.17 | 88454.30 |
| 2001 | 61.46 | 54.00 | 7.45 | 1071.98 | 42.26  | 5.37  | 98.59 | 34.61 | 64.89 | 3.49 | 1.89 | 76.58 | 5.43 | 4.36 | 58.40 | 83.00 | 2273.90 | 88478.81 |
| 2002 | 61.51 | 54.07 | 7.44 | 1080.14 | 43.57  | 5.45  | 98.63 | 34.98 | 64.54 | 3.52 | 1.93 | 76.62 | 5.48 | 4.24 | 57.30 | 83.70 | 2019.01 | 88514.94 |
| 2003 | 61.61 | 54.17 | 7.45 | 1096.49 | 51.60  | 6.22  | 98.70 | 32.58 | 66.99 | 4.17 | 2.05 | 76.67 | 5.52 | 4.12 | 56.10 | 84.40 | 2094.82 | 88550.92 |
| 2004 | 61.62 | 54.18 | 7.44 | 1120.52 | 58.70  | 6.76  | 98.81 | 31.60 | 68.02 | 4.60 | 2.16 | 76.72 | 5.56 | 3.99 | 55.00 | 85.10 | 2115.90 | 88587.71 |
| 2005 | 61.97 | 54.46 | 7.51 | 1137.58 | 65.68  | 7.21  | 98.85 | 31.17 | 68.46 | 4.94 | 2.28 | 76.76 | 5.61 | 3.87 | 53.90 | 85.70 | 2160.04 | 88653.87 |
| 2006 | 61.85 | 54.39 | 7.46 | 1172.79 | 68.70  | 7.05  | 98.84 | 32.92 | 66.69 | 4.70 | 2.35 | 76.81 | 5.67 | 3.74 | 52.80 | 86.40 | 2149.83 | 88681.62 |
| 2007 | 62.49 | 54.94 | 7.55 | 1212.51 | 81.90  | 7.72  | 98.84 | 69.13 | 69.13 | 5.34 | 2.38 | 76.85 | 5.73 | 3.62 | 51.70 | 87.10 | 2432.43 | 88709.45 |
| 2008 | 62.84 | 55.25 | 7.59 | 1261.74 | 97.69  | 8.05  | 98.77 | 28.27 | 71.38 | 5.75 | 2.30 | 76.90 | 5.80 | 3.50 | 50.60 | 87.80 | 2518.57 | 88753.33 |
| 2009 | 63.27 | 55.62 | 7.65 | 1303.22 | 107.10 | 8.37  | 98.82 | 28.50 | 71.16 | 5.96 | 2.41 | 76.94 | 5.87 | 3.40 | 49.50 | 88.50 | 2523.22 | 88793.48 |
| 2010 | 63.63 | 55.92 | 7.71 | 1325.99 | 120.11 | 8.84  | 99.22 | 41.43 | 58.25 | 5.15 | 3.69 | 77.00 | 5.95 | 3.30 | 48.40 | 89.20 | 2629.83 | 88846.30 |
| 2011 | 64.09 | 56.33 | 7.76 | 1361.57 | 128.23 | 8.71  | 99.22 | 42.05 | 57.62 | 5.02 | 3.69 | 77.05 | 6.05 | 3.21 | 47.30 | 89.90 | 2701.62 | 88801.23 |
| 2012 | 64.56 | 56.74 | 7.81 | 1402.80 | 141.97 | 8.95  | 99.22 | 40.90 | 58.78 | 5.26 | 3.69 | 77.12 | 6.16 | 3.13 | 47.30 | 89.90 | 2766.30 | 88773.05 |
| 2013 | 65.04 | 57.17 | 7.87 | 1447.47 | 153.96 | 9.14  | 99.22 | 41.44 | 58.23 | 5.32 | 3.82 | 77.19 | 6.27 | 3.06 | 47.30 | 89.90 | -       | 88746.80 |
| 2014 | 65.56 | 57.62 | 7.94 | 1508.29 | 190.76 | 10.57 | 99.22 | 35.84 | 63.88 | 6.75 | 3.82 | 77.26 | 6.35 | 2.98 | 47.40 | 90.00 | -       | 88740.28 |
| 2015 | 66.01 | 58.00 | 8.01 | 1579.92 | -      | -     | -     | -     | -     | -    | -    | 77.34 | 6.42 | 2.91 | 47.40 | 90.00 | -       | 88736.32 |
| 2016 | 66.68 | 58.58 | 8.10 | -       | -      | -     | -     | -     | -     | -    | -    | 77.43 | 6.48 | -    | -     | -     | -       | 88743.97 |
| 2017 | 67.35 | 59.26 | 8.09 | -       | -      | -     | -     | -     | -     | -    | -    | -     | -    | -    | -     | -     | -       | -        |

|                    |      |       |       |      |         |        |      |       |       |       |      |      |       |      |      |       |       |          |          |
|--------------------|------|-------|-------|------|---------|--------|------|-------|-------|-------|------|------|-------|------|------|-------|-------|----------|----------|
| Dominican Republic | 1995 | 71.97 | 63.17 | 8.80 | 3032.79 | 102.46 | 5.21 | 69.94 | 54.43 | 22.17 | 1.16 | 4.06 | 57.60 | 7.73 | 3.13 | 75.20 | 87.00 | 22043.96 | 90083.57 |
|                    | 1996 | 72.06 | 63.24 | 8.82 | 3193.76 | 106.02 | 5.01 | 75.69 | 57.00 | 24.69 | 1.24 | 3.78 | 58.44 | 7.91 | 3.07 | 75.60 | 87.00 | 23333.57 | 90067.71 |
|                    | 1997 | 72.39 | 63.39 | 9.00 | 3392.62 | 124.17 | 5.27 | 68.76 | 49.34 | 28.24 | 1.49 | 3.78 | 59.27 | 8.08 | 3.01 | 76.10 | 87.00 | 25012.87 | 90083.84 |
|                    | 1998 | 72.51 | 63.19 | 9.31 | 3572.31 | 133.71 | 5.44 | 68.14 | 45.61 | 33.07 | 1.80 | 3.64 | 60.10 | 8.25 | 2.97 | 76.60 | 87.00 | 26833.05 | 90115.62 |
|                    | 1999 | 72.86 | 63.76 | 9.09 | 3752.17 | 144.07 | 5.66 | 68.40 | 44.22 | 35.34 | 2.00 | 3.66 | 60.93 | 8.41 | 2.93 | 77.00 | 86.90 | 27056.23 | 90147.01 |
|                    | 2000 | 73.05 | 64.12 | 8.93 | 3902.60 | 163.05 | 5.90 | 68.55 | 43.09 | 37.15 | 2.19 | 3.71 | 61.75 | 8.58 | 2.89 | 77.50 | 86.80 | 28492.20 | 90180.31 |
|                    | 2001 | 73.23 | 64.24 | 8.99 | 3911.76 | 157.67 | 5.59 | 68.20 | 44.72 | 34.43 | 1.93 | 3.67 | 62.56 | 8.74 | 2.86 | 77.90 | 86.80 | 28416.24 | 90228.97 |
|                    | 2002 | 73.33 | 64.26 | 9.07 | 4074.85 | 163.28 | 5.79 | 66.60 | 43.49 | 34.70 | 2.01 | 3.78 | 63.36 | 8.90 | 2.84 | 78.40 | 86.70 | 29253.32 | 90290.54 |
|                    | 2003 | 73.37 | 64.26 | 9.11 | 4003.13 | 123.70 | 5.53 | 67.98 | 45.61 | 32.90 | 1.82 | 3.71 | 64.60 | 9.05 | 2.81 | 78.90 | 86.60 | 28367.13 | 90351.32 |
|                    | 2004 | 73.12 | 64.44 | 8.68 | 3995.40 | 101.54 | 4.28 | 77.19 | 52.15 | 32.44 | 1.39 | 2.89 | 66.00 | 9.19 | 2.78 | 79.40 | 86.60 | 28494.00 | 90421.74 |
|                    | 2005 | 73.32 | 64.50 | 8.82 | 4301.88 | 154.23 | 4.26 | 77.87 | 50.72 | 34.87 | 1.49 | 2.78 | 67.36 | 9.30 | 2.75 | 79.90 | 86.50 | 29247.79 | 90491.17 |

|             |       |       |       |         |        |       |       |        |       |       |      |       |       |      |       |       |          |          |          |
|-------------|-------|-------|-------|---------|--------|-------|-------|--------|-------|-------|------|-------|-------|------|-------|-------|----------|----------|----------|
| 2006        | 73.49 | 64.52 | 8.98  | 4692.99 | 165.87 | 4.34  | 77.41 | 45.66  | 41.01 | 1.78  | 2.56 | 68.71 | 9.39  | 2.72 | 80.40 | 86.40 | 29635.72 | 90526.91 |          |
| 2007        | 73.77 | 64.49 | 9.28  | 5030.36 | 199.65 | 4.34  | 75.84 | 45.87  | 45.87 | 1.99  | 2.35 | 70.02 | 9.47  | 2.69 | 80.80 | 86.30 | 30393.15 | 90571.91 |          |
| 2008        | 74.08 | 64.53 | 9.55  | 5120.61 | 206.95 | 4.20  | 75.13 | 38.41  | 48.88 | 2.05  | 2.15 | 71.30 | 9.54  | 2.66 | 81.30 | 86.20 | 30646.08 | 90615.86 |          |
| 2009        | 74.31 | 64.49 | 9.82  | 5099.60 | 216.25 | 4.41  | 71.02 | 34.86  | 50.91 | 2.25  | 2.17 | 72.54 | 9.62  | 2.63 | 81.70 | 86.00 | 30499.85 | 90658.76 |          |
| 2010        | 74.47 | 64.13 | 10.34 | 5451.07 | 217.71 | 4.06  | 75.09 | 33.24  | 55.73 | 2.26  | 1.80 | 73.75 | 9.72  | 2.60 | 82.10 | 85.90 | 31668.71 | 90718.28 |          |
| 2011        | 74.60 | 64.10 | 10.50 | 5547.79 | 244.15 | 4.22  | 74.80 | 28.63  | 61.73 | 2.60  | 1.61 | 74.93 | 9.84  | 2.57 | 82.50 | 85.70 | 32578.16 | 90753.97 |          |
| 2012        | 74.82 | 64.03 | 10.79 | 5630.99 | 253.80 | 4.26  | 71.19 | 26.08  | 63.36 | 2.70  | 1.56 | 76.04 | 9.97  | 2.54 | 82.90 | 85.40 | 33395.08 | 90781.65 |          |
| 2013        | 75.01 | 63.86 | 11.14 | 5825.53 | 245.18 | 4.12  | 68.90 | 25.02  | 63.69 | 2.62  | 1.50 | 77.08 | 10.12 | 2.51 | 83.30 | 85.20 | -        | 90822.43 |          |
| 2014        | 75.22 | 65.99 | 9.23  | 6193.76 | 268.99 | 4.38  | 63.87 | 21.14  | 66.90 | 2.93  | 1.45 | 78.06 | 10.30 | 2.48 | 83.60 | 85.00 | -        | 90862.87 |          |
| 2015        | 75.43 | 62.95 | 12.48 | 6552.69 | -      | -     | -     | -      | -     | -     | -    | 78.98 | 10.50 | 2.45 | 84.00 | 84.70 | -        | 90944.07 |          |
| 2016        | 75.64 | 64.07 | 11.57 | 6909.13 | -      | -     | -     | -      | -     | -     | -    | 79.84 | 10.72 | -    | -     | -     | -        | 91002.60 |          |
| 2017        | 73.09 | 64.23 | 8.86  | -       | -      | -     | -     | -      | -     | -     | -    | -     | -     | -    | -     | -     | -        | -        |          |
| Timor-Leste | 1995  | 60.82 | 52.96 | 7.86    | -      | -     | -     | -      | -     | -     | -    | 22.53 | 3.58  | 6.38 | 37.10 | 52.80 | 781.22   | 88098.21 |          |
|             | 1996  | 62.39 | 54.27 | 8.11    | -      | -     | -     | -      | -     | -     | -    | 22.87 | 3.84  | 6.63 | 37.10 | 52.90 | 637.44   | 87968.11 |          |
|             | 1997  | 61.48 | 53.52 | 7.96    | -      | -     | -     | -      | -     | -     | -    | 23.22 | 4.08  | 6.83 | 37.20 | 52.90 | 617.30   | 87889.46 |          |
|             | 1998  | 61.73 | 53.74 | 7.99    | -      | -     | -     | -      | -     | -     | -    | 23.56 | 4.30  | 6.99 | 37.30 | 53.00 | 643.15   | 87826.78 |          |
|             | 1999  | 55.57 | 48.62 | 6.95    | 385.10 | -     | -     | -      | -     | -     | -    | 23.91 | 4.51  | 7.08 | 37.30 | 53.10 | 560.33   | 87828.35 |          |
|             | 2000  | 63.64 | 55.34 | 8.30    | 602.95 | 16.99 | 3.26  | 48.89  | 30.56 | 37.48 | 1.22 | 2.04  | 24.26 | 4.72 | 7.11  | 37.40 | 54.30    | 615.33   | 87865.40 |
|             | 2001  | 64.27 | 55.91 | 8.37    | 684.86 | 21.09 | 3.75  | 49.59  | 33.41 | 32.64 | 1.22 | 2.53  | 24.62 | 4.84 | 7.09  | 37.40 | 55.60    | 790.91   | 87991.19 |
|             | 2002  | 64.77 | 56.37 | 8.41    | 617.55 | 20.86 | 3.89  | 47.79  | 32.15 | 32.73 | 1.27 | 2.62  | 24.98 | 4.97 | 7.04  | 37.50 | 56.90    | 804.05   | 88070.42 |
|             | 2003  | 65.20 | 56.75 | 8.44    | 580.59 | 13.38 | 2.48  | 100.00 | 45.82 | 54.18 | 1.35 | 1.14  | 25.34 | 5.10 | 6.97  | 37.60 | 58.20    | 860.41   | 88121.70 |
|             | 2004  | 66.14 | 57.53 | 8.62    | 565.35 | 14.82 | 1.31  | 100.00 | 45.55 | 54.45 | 0.71 | 0.60  | 25.71 | 5.21 | 6.88  | 37.70 | 59.60    | 878.93   | 88090.14 |
|             | 2005  | 67.16 | 58.38 | 8.78    | 584.53 | 19.20 | 1.05  | 100.00 | 42.63 | 57.37 | 0.60 | 0.45  | 26.31 | 5.29 | 6.79  | 37.80 | 60.90    | 885.58   | 87971.26 |
|             | 2006  | 68.30 | 59.33 | 8.98    | 538.69 | 18.30 | 0.65  | 100.00 | 32.52 | 67.48 | 0.44 | 0.21  | 26.93 | 5.41 | 6.69  | 38.00 | 62.40    | 898.10   | 87821.15 |
|             | 2007  | 69.20 | 60.02 | 9.19    | 591.12 | 10.69 | 0.37  | 99.34  | 48.36 | 48.36 | 0.18 | 0.19  | 27.56 | 5.53 | 6.59  | 38.30 | 63.80    | 901.88   | 87629.21 |
|             | 2008  | 70.03 | 60.70 | 9.33    | 666.68 | 31.83 | 0.74  | 99.35  | 15.85 | 84.05 | 0.62 | 0.12  | 28.20 | 5.67 | 6.48  | 38.50 | 65.20    | 912.73   | 87453.76 |
|             | 2009  | 70.60 | 61.17 | 9.43    | 743.76 | 32.24 | 1.02  | 99.36  | 13.99 | 85.92 | 0.88 | 0.14  | 28.85 | 5.82 | 6.36  | 38.80 | 66.70    | 925.42   | 87295.68 |
|             | 2010  | 71.09 | 61.66 | 9.43    | 806.06 | 36.78 | 0.92  | 99.38  | 11.32 | 88.61 | 0.82 | 0.11  | 29.51 | 6.00 | 6.23  | 39.10 | 68.20    | 940.46   | 87169.84 |
|             | 2011  | 71.59 | 62.05 | 9.54    | 853.15 | 40.25 | 0.76  | 99.48  | 10.61 | 89.34 | 0.68 | 0.08  | 30.17 | 6.15 | 6.11  | 39.50 | 69.70    | 949.91   | 87020.72 |



|             |      |       |       |      |         |        |      |        |       |       |      |      |       |       |      |       |       |          |          |
|-------------|------|-------|-------|------|---------|--------|------|--------|-------|-------|------|------|-------|-------|------|-------|-------|----------|----------|
| El Salvador | 1995 | 70.28 | 62.04 | 8.24 | 2724.76 | 108.43 | 6.38 | 98.77  | 60.73 | 38.52 | 2.46 | 3.92 | 53.97 | 8.37  | 3.58 | 56.90 | 76.20 | 9244.05  | 87793.50 |
|             | 1996 | 70.64 | 62.35 | 8.29 | 2741.53 | 138.52 | 7.58 | 97.46  | 57.51 | 40.99 | 3.11 | 4.47 | 55.25 | 8.57  | 3.48 | 58.10 | 77.40 | 9079.12  | 87785.08 |
|             | 1997 | 71.11 | 62.74 | 8.37 | 2830.08 | 160.55 | 8.21 | 97.32  | 59.32 | 39.05 | 3.20 | 5.00 | 56.53 | 8.78  | 3.38 | 59.30 | 78.60 | 10076.61 | 87785.98 |
|             | 1998 | 71.35 | 62.93 | 8.42 | 2910.29 | 176.39 | 8.43 | 96.67  | 54.41 | 43.72 | 3.68 | 4.74 | 57.80 | 9.01  | 3.26 | 60.50 | 79.80 | 10166.68 | 87790.70 |
|             | 1999 | 71.92 | 63.41 | 8.51 | 2986.64 | 176.19 | 8.16 | 94.60  | 52.29 | 44.73 | 3.65 | 4.51 | 58.36 | 9.25  | 3.14 | 61.50 | 80.70 | 10405.90 | 87810.55 |
|             | 2000 | 72.25 | 63.71 | 8.53 | 3028.87 | 184.64 | 8.17 | 94.62  | 50.66 | 46.46 | 3.80 | 4.37 | 58.91 | 9.49  | 3.02 | 62.40 | 81.60 | 10344.83 | 87856.54 |
|             | 2001 | 71.98 | 63.47 | 8.51 | 3060.63 | 189.50 | 8.02 | 93.11  | 49.53 | 46.81 | 3.75 | 4.27 | 59.46 | 9.77  | 2.90 | 63.30 | 82.50 | 11361.00 | 87927.85 |
|             | 2002 | 72.73 | 64.10 | 8.63 | 3114.17 | 192.39 | 7.90 | 93.38  | 48.39 | 48.18 | 3.81 | 4.09 | 60.01 | 10.04 | 2.79 | 64.20 | 83.40 | 11242.81 | 88020.63 |
|             | 2003 | 72.86 | 64.21 | 8.65 | 3169.13 | 193.95 | 7.61 | 93.30  | 47.30 | 49.30 | 3.75 | 3.86 | 60.56 | 10.30 | 2.69 | 65.10 | 84.30 | 11251.28 | 88121.23 |
|             | 2004 | 73.03 | 64.34 | 8.69 | 3212.05 | 194.57 | 7.30 | 92.55  | 46.44 | 49.82 | 3.64 | 3.66 | 61.11 | 10.54 | 2.60 | 65.90 | 85.20 | 11578.90 | 88235.23 |
|             | 2005 | 73.20 | 64.51 | 8.69 | 3310.94 | 206.66 | 7.19 | 91.68  | 43.07 | 53.02 | 3.81 | 3.38 | 61.65 | 10.77 | 2.53 | 66.80 | 86.00 | 11528.25 | 88350.82 |
|             | 2006 | 73.48 | 64.76 | 8.72 | 3424.83 | 207.54 | 6.68 | 88.93  | 33.61 | 62.21 | 4.15 | 2.52 | 62.19 | 11.00 | 2.47 | 67.70 | 86.90 | 11690.55 | 88439.32 |
|             | 2007 | 73.67 | 64.87 | 8.80 | 3540.55 | 212.09 | 6.32 | 89.00  | 59.30 | 59.30 | 3.74 | 2.57 | 62.72 | 11.20 | 2.41 | 68.50 | 87.70 | 12085.96 | 88529.57 |
|             | 2008 | 73.92 | 65.07 | 8.85 | 3569.92 | 221.77 | 6.21 | 88.77  | 35.81 | 59.66 | 3.71 | 2.51 | 63.25 | 11.39 | 2.36 | 69.40 | 88.50 | 11979.67 | 88643.82 |
|             | 2009 | 73.98 | 65.11 | 8.88 | 3442.87 | 234.40 | 6.83 | 87.94  | 34.73 | 60.51 | 4.13 | 2.70 | 63.77 | 11.57 | 2.31 | 70.20 | 89.30 | 11911.56 | 88756.30 |
|             | 2010 | 74.27 | 65.41 | 8.87 | 3474.39 | 245.19 | 6.91 | 88.58  | 33.61 | 62.06 | 4.29 | 2.62 | 64.29 | 11.72 | 2.27 | 71.00 | 90.10 | 11978.85 | 88876.78 |
|             | 2011 | 74.53 | 65.56 | 8.97 | 3535.39 | 260.16 | 6.81 | 88.04  | 32.07 | 63.57 | 4.33 | 2.48 | 64.79 | 11.86 | 2.22 | 71.80 | 90.90 | 12293.61 | 88969.09 |
|             | 2012 | 74.70 | 65.73 | 8.97 | 3585.28 | 262.93 | 6.70 | 87.08  | 32.39 | 62.80 | 4.21 | 2.49 | 65.29 | 11.99 | 2.19 | 72.60 | 91.60 | 12577.79 | 89058.54 |
|             | 2013 | 74.80 | 65.86 | 8.95 | 3634.24 | 276.70 | 6.95 | 85.38  | 28.44 | 66.69 | 4.63 | 2.31 | 65.78 | 12.11 | 2.16 | 73.40 | 92.40 | -        | 89152.31 |
|             | 2014 | 75.02 | 66.04 | 8.98 | 3668.20 | 279.65 | 6.77 | 84.81  | 28.85 | 66.00 | 4.47 | 2.30 | 66.26 | 12.26 | 2.13 | 74.20 | 93.10 | -        | 89236.93 |
|             | 2015 | 75.23 | 66.21 | 9.02 | 3733.92 | -      | -    | -      | -     | -     | -    | -    | 66.73 | 12.44 | 2.10 | 75.00 | 93.80 | -        | 89310.65 |
|             | 2016 | 75.47 | 66.48 | 8.99 | 3802.86 | -      | -    | -      | -     | -     | -    | -    | 67.19 | 12.63 | -    | -     | -     | -        | 89405.98 |
|             | 2017 | 74.01 | 65.00 | 9.01 | -       | -      | -    | -      | -     | -     | -    | -    | -     | -     | -    | -     | -     | -        | -        |
| Equatorial  | 1995 | 47.81 | 41.61 | 6.21 | 871.59  | 17.03  | 5.38 | 100.00 | 27.83 | 72.17 | 3.88 | 1.50 | 38.83 | 7.44  | 5.97 | 81.10 | 47.30 | 1991.99  | 92037.86 |
| Guinea      | 1996 | 48.41 | 42.15 | 6.26 | 1398.89 | 22.26  | 4.44 | 100.00 | 38.46 | 61.54 | 2.73 | 1.71 | 38.83 | 7.30  | 5.96 | 81.10 | 47.30 | 2146.82  | 91847.44 |
|             | 1997 | 50.60 | 44.00 | 6.60 | 3364.35 | 29.35  | 3.18 | 87.25  | 25.57 | 70.70 | 2.25 | 0.93 | 38.82 | 7.15  | 5.94 | 81.10 | 47.30 | 2937.21  | 91693.01 |
|             | 1998 | 51.93 | 45.12 | 6.81 | 4002.27 | 31.95  | 4.28 | 90.26  | 25.78 | 71.44 | 3.06 | 1.22 | 38.82 | 6.99  | 5.91 | 81.10 | 47.30 | 3525.00  | 91541.18 |
|             | 1999 | 53.05 | 46.07 | 6.98 | 4831.07 | 33.37  | 2.76 | 85.79  | 26.00 | 69.69 | 1.92 | 0.84 | 38.81 | 6.83  | 5.88 | 80.60 | 47.30 | 3782.64  | 91410.76 |
|             | 2000 | 54.31 | 47.12 | 7.19 | 5484.30 | 53.84  | 2.73 | 80.13  | 16.61 | 79.27 | 2.17 | 0.57 | 38.81 | 6.68  | 5.83 | 80.20 | 47.30 | 4048.33  | 91293.52 |

|      |       |       |      |          |        |      |       |       |       |      |      |       |      |      |       |       |         |          |
|------|-------|-------|------|----------|--------|------|-------|-------|-------|------|------|-------|------|------|-------|-------|---------|----------|
| 2001 | 55.77 | 48.35 | 7.42 | 8603.96  | 47.46  | 1.78 | 74.08 | 18.59 | 74.90 | 1.34 | 0.45 | 38.80 | 6.55 | 5.79 | 79.70 | 47.30 | 5278.00 | 91196.00 |
| 2002 | 56.93 | 49.32 | 7.61 | 9867.56  | 65.28  | 2.05 | 87.71 | 40.17 | 54.20 | 1.11 | 0.94 | 38.79 | 6.41 | 5.73 | 79.30 | 47.30 | -       | 91114.70 |
| 2003 | 57.44 | 49.75 | 7.69 | 10788.03 | 94.42  | 2.23 | 84.22 | 26.52 | 68.51 | 1.53 | 0.70 | 38.80 | 6.27 | 5.68 | 78.90 | 47.30 | -       | 91035.82 |
| 2004 | 57.98 | 50.20 | 7.79 | 14266.93 | 174.45 | 2.40 | 89.64 | 39.08 | 56.41 | 1.35 | 1.05 | 38.82 | 6.15 | 5.62 | 78.40 | 47.30 | 5553.98 | 90959.85 |
| 2005 | 58.06 | 50.28 | 7.78 | 15941.65 | 214.10 | 1.63 | 87.76 | 38.57 | 56.05 | 0.91 | 0.72 | 38.86 | 6.03 | 5.56 | 78.00 | 47.30 | 5675.89 | 90896.16 |
| 2006 | 58.96 | 51.08 | 7.88 | 16413.54 | 266.45 | 2.13 | 81.65 | 25.37 | 68.93 | 1.47 | 0.66 | 38.90 | 5.90 | 5.50 | 77.50 | 47.40 | 5693.14 | 90870.04 |
| 2007 | 59.36 | 51.40 | 7.96 | 18075.18 | 344.18 | 2.25 | 82.71 | 72.99 | 72.99 | 1.64 | 0.61 | 38.96 | 5.77 | 5.43 | 77.10 | 47.40 | 5927.14 | 90837.73 |
| 2008 | 59.77 | 51.76 | 8.01 | 20333.94 | 519.90 | 2.31 | 79.66 | 17.79 | 77.67 | 1.80 | 0.52 | 39.04 | 5.65 | 5.36 | 76.70 | 47.40 | 5766.37 | 90820.78 |
| 2009 | 60.25 | 52.16 | 8.09 | 19684.70 | 702.63 | 5.32 | 87.78 | 14.18 | 83.85 | 4.46 | 0.86 | 39.12 | 5.53 | 5.29 | 76.20 | 47.50 | 5840.52 | 90805.81 |
| 2010 | 60.93 | 52.78 | 8.15 | 17136.45 | 609.27 | 3.84 | 86.57 | 17.63 | 79.63 | 3.06 | 0.78 | 39.22 | 5.41 | 5.21 | 75.80 | 47.50 | 6099.11 | 90783.38 |
| 2011 | 61.41 | 53.15 | 8.26 | 17461.55 | 688.82 | 3.29 | 84.90 | 17.94 | 78.87 | 2.60 | 0.70 | 39.34 | 5.29 | 5.13 | 75.40 | 47.60 | -       | 90745.28 |
| 2012 | 62.26 | 53.86 | 8.40 | 18106.34 | 852.46 | 4.00 | 84.44 | 14.25 | 83.13 | 3.33 | 0.67 | 39.46 | 5.16 | 5.04 | 74.90 | 47.70 | 6374.17 | 90730.67 |
| 2013 | 63.66 | 55.03 | 8.62 | 16634.77 | 729.75 | 3.73 | 86.39 | 17.85 | 79.33 | 2.96 | 0.77 | 39.60 | 5.03 | 4.95 | 74.50 | 47.70 | -       | 90711.29 |
| 2014 | 64.65 | 55.88 | 8.78 | 16028.25 | 663.05 | 3.80 | 87.95 | 20.15 | 77.09 | 2.93 | 0.87 | 39.76 | 4.92 | 4.86 | 74.50 | 47.80 | -       | 90683.09 |
| 2015 | 65.16 | 56.32 | 8.85 | 14010.94 | -      | -    | -     | -     | -     | -    | -    | 39.92 | 4.84 | 4.78 | 74.50 | 47.90 | -       | 90663.36 |
| 2016 | 65.47 | 56.66 | 8.81 | 12278.13 | -      | -    | -     | -     | -     | -    | -    | 40.10 | 4.79 | -    | -     | -     | -       | 90640.68 |
| 2017 | 65.52 | 56.32 | 9.20 | -        | -      | -    | -     | -     | -     | -    | -    | -     | -    | -    | -     | -     | -       | -        |

|         |      |       |       |      |        |       |      |        |       |       |      |      |       |      |      |       |       |         |          |
|---------|------|-------|-------|------|--------|-------|------|--------|-------|-------|------|------|-------|------|------|-------|-------|---------|----------|
| Eritrea | 1995 | 56.47 | 49.67 | 6.80 | 539.93 | 8.58  | 4.52 | 100.00 | 51.99 | 48.01 | 2.17 | 2.35 | 16.54 | 6.31 | 5.91 | 9.80  | 48.40 | 3751.32 | 88797.23 |
|         | 1996 | 57.10 | 50.24 | 6.86 | 584.95 | 7.82  | 3.61 | 100.00 | 63.43 | 36.57 | 1.32 | 2.29 | 16.72 | 6.38 | 5.79 | 10.10 | 48.90 | 4186.31 | 88816.87 |
|         | 1997 | 57.76 | 50.83 | 6.93 | 622.24 | 9.31  | 4.20 | 100.00 | 57.82 | 42.18 | 1.77 | 2.43 | 16.91 | 6.43 | 5.67 | 10.40 | 49.40 | 4543.02 | 88840.35 |
|         | 1998 | 58.30 | 51.31 | 6.99 | 620.92 | 10.02 | 4.48 | 100.00 | 58.71 | 41.29 | 1.85 | 2.63 | 17.11 | 6.45 | 5.55 | 10.70 | 49.90 | 4670.67 | 88877.85 |
|         | 1999 | 49.38 | 43.75 | 5.62 | 606.33 | 10.05 | 5.01 | 100.00 | 60.11 | 39.89 | 2.00 | 3.01 | 17.33 | 6.45 | 5.43 | 11.10 | 50.50 | 4939.41 | 88897.24 |
|         | 2000 | 58.08 | 51.17 | 6.91 | 571.60 | 8.86  | 4.43 | 100.00 | 64.18 | 35.82 | 1.59 | 2.85 | 17.56 | 6.45 | 5.33 | 11.40 | 51.00 | 4981.26 | 88927.90 |
|         | 2001 | 59.43 | 52.32 | 7.11 | 603.11 | 8.13  | 3.95 | 100.00 | 64.88 | 35.12 | 1.39 | 2.56 | 17.80 | 6.40 | 5.23 | 11.70 | 51.50 | 4725.51 | 88958.56 |
|         | 2002 | 59.73 | 52.60 | 7.13 | 601.03 | 7.74  | 4.02 | 100.00 | 59.22 | 40.78 | 1.64 | 2.38 | 18.05 | 6.34 | 5.15 | 12.00 | 52.10 | 4456.55 | 88980.11 |
|         | 2003 | 59.97 | 52.82 | 7.14 | 565.73 | 7.76  | 3.50 | 100.00 | 63.12 | 36.88 | 1.29 | 2.21 | 18.32 | 6.28 | 5.07 | 12.40 | 52.60 | 4481.71 | 88997.59 |
|         | 2004 | 60.19 | 53.03 | 7.16 | 556.04 | 8.57  | 3.14 | 100.00 | 60.67 | 39.33 | 1.24 | 1.91 | 18.60 | 6.21 | 5.01 | 12.70 | 53.10 | 4532.74 | 88985.64 |
|         | 2005 | 60.38 | 53.22 | 7.17 | 554.49 | 7.78  | 2.97 | 100.00 | 63.07 | 36.93 | 1.10 | 1.87 | 18.89 | 6.16 | 4.94 | 13.00 | 53.70 | 4476.29 | 88969.04 |
|         | 2006 | 60.71 | 53.51 | 7.20 | 535.93 | 9.28  | 3.30 | 100.00 | 55.43 | 44.57 | 1.47 | 1.83 | 19.20 | 6.25 | 4.88 | 13.30 | 54.20 | 4483.42 | 88934.67 |

|      |       |       |      |        |       |      |        |       |       |      |      |       |      |      |       |       |         |          |
|------|-------|-------|------|--------|-------|------|--------|-------|-------|------|------|-------|------|------|-------|-------|---------|----------|
| 2007 | 60.98 | 53.73 | 7.25 | 532.23 | 9.85  | 3.29 | 100.00 | 45.28 | 45.28 | 1.49 | 1.80 | 19.52 | 6.33 | 4.82 | 13.70 | 54.80 | 4868.86 | 88910.65 |
| 2008 | 61.18 | 53.91 | 7.27 | 471.17 | 11.31 | 3.69 | 100.00 | 47.64 | 52.36 | 1.93 | 1.76 | 19.85 | 6.40 | 4.75 | 14.00 | 55.30 | 4954.76 | 88903.07 |
| 2009 | 61.41 | 54.12 | 7.30 | 480.61 | 13.35 | 3.30 | 100.00 | 57.66 | 42.34 | 1.40 | 1.90 | 20.21 | 6.46 | 4.68 | 14.30 | 55.90 | 4751.09 | 88904.79 |
| 2010 | 61.60 | 54.30 | 7.31 | 482.15 | 14.63 | 3.24 | 100.00 | 56.03 | 43.97 | 1.42 | 1.82 | 20.57 | 6.51 | 4.61 | 14.60 | 56.40 | 4844.79 | 88941.28 |
| 2011 | 61.94 | 54.59 | 7.35 | 514.18 | 16.67 | 3.06 | 100.00 | 54.01 | 45.99 | 1.41 | 1.65 | 20.95 | 6.61 | 4.53 | 14.90 | 57.00 | 4912.88 | 88892.08 |
| 2012 | 62.27 | 54.90 | 7.37 | -      | 18.81 | 2.98 | 100.00 | 53.50 | 46.50 | 1.38 | 1.59 | -     | -    | 4.44 | 15.30 | 57.50 | 4977.89 | 88866.96 |
| 2013 | 62.57 | 55.17 | 7.40 | -      | 20.75 | 3.01 | 100.00 | 54.24 | 45.76 | 1.38 | 1.63 | -     | -    | 4.36 | 15.40 | 57.60 | -       | 88844.12 |
| 2014 | 62.95 | 55.52 | 7.44 | -      | 25.20 | 3.34 | 100.00 | 54.24 | 45.76 | 1.53 | 1.81 | -     | -    | 4.29 | 15.60 | 57.70 | -       | 88860.01 |
| 2015 | 63.30 | 55.82 | 7.48 | -      | -     | -    | -      | -     | -     | -    | -    | -     | -    | 4.21 | 15.70 | 57.80 | -       | 88874.25 |
| 2016 | 63.66 | 56.16 | 7.50 | -      | -     | -    | -      | -     | -     | -    | -    | -     | -    | -    | -     | -     | -       | 88918.86 |
| 2017 | 62.67 | 54.36 | 8.31 | -      | -     | -    | -      | -     | -     | -    | -    | -     | -    | -    | -     | -     | -       | -        |

|         |      |       |       |       |          |         |      |        |       |       |      |      |       |       |      |       |       |          |          |
|---------|------|-------|-------|-------|----------|---------|------|--------|-------|-------|------|------|-------|-------|------|-------|-------|----------|----------|
| Estonia | 1995 | 67.70 | 59.07 | 8.63  | 7313.74  | 164.80  | 6.32 | 100.00 | 10.23 | 89.77 | 5.67 | 0.65 | 70.30 | 20.68 | 1.38 | 96.90 | 98.90 | 31933.33 | 90739.19 |
|         | 1996 | 69.89 | 60.86 | 9.03  | 7817.60  | 218.12  | 6.57 | 98.85  | 11.49 | 88.37 | 5.81 | 0.76 | 70.11 | 21.11 | 1.37 | 96.90 | 98.90 | 32604.28 | 90800.01 |
|         | 1997 | 70.13 | 61.06 | 9.07  | 8840.26  | 222.44  | 6.19 | 97.87  | 10.60 | 89.17 | 5.52 | 0.67 | 69.92 | 21.45 | 1.32 | 96.90 | 98.90 | 32114.21 | 90874.62 |
|         | 1998 | 69.73 | 60.79 | 8.94  | 9293.08  | 223.10  | 5.56 | 96.62  | 13.19 | 86.35 | 4.80 | 0.76 | 69.73 | 21.71 | 1.28 | 96.90 | 98.90 | 19347.23 | 90944.08 |
|         | 1999 | 70.54 | 61.43 | 9.12  | 9186.39  | 242.57  | 5.86 | 74.41  | 14.11 | 77.47 | 4.54 | 1.11 | 69.54 | 21.98 | 1.30 | 96.90 | 99.00 | 18098.98 | 91006.15 |
|         | 2000 | 70.84 | 61.69 | 9.15  | 10108.21 | 214.38  | 5.28 | 88.49  | 19.93 | 77.16 | 4.08 | 1.19 | 69.37 | 22.28 | 1.36 | 97.00 | 99.00 | 17768.81 | 91091.14 |
|         | 2001 | 70.61 | 61.54 | 9.08  | 10816.60 | 217.71  | 4.85 | 88.94  | 18.99 | 78.65 | 3.82 | 1.04 | 69.24 | 22.82 | 1.32 | 97.00 | 99.00 | 17940.16 | 91102.89 |
|         | 2002 | 71.38 | 62.17 | 9.21  | 11546.77 | 256.66  | 4.84 | 87.72  | 20.07 | 77.12 | 3.74 | 1.11 | 69.12 | 23.37 | 1.36 | 97.00 | 99.10 | 22955.36 | 91117.28 |
|         | 2003 | 71.94 | 62.62 | 9.32  | 12481.19 | 352.40  | 4.92 | 88.01  | 20.41 | 76.75 | 3.78 | 1.14 | 68.99 | 23.90 | 1.37 | 97.00 | 99.10 | 19449.74 | 91120.89 |
|         | 2004 | 72.43 | 63.02 | 9.41  | 13346.40 | 452.33  | 5.13 | 88.82  | 21.32 | 75.55 | 3.88 | 1.23 | 68.86 | 24.32 | 1.47 | 97.00 | 99.20 | 20024.43 | 91116.04 |
|         | 2005 | 72.89 | 63.44 | 9.45  | 14681.23 | 514.22  | 5.02 | 88.74  | 20.42 | 76.70 | 3.85 | 1.15 | 68.74 | 24.61 | 1.52 | 97.10 | 99.20 | 20053.58 | 91118.20 |
|         | 2006 | 73.20 | 63.69 | 9.50  | 16285.01 | 624.62  | 5.01 | 95.97  | 25.09 | 73.25 | 3.67 | 1.31 | 68.61 | 24.99 | 1.58 | 97.10 | 99.30 | 19628.39 | 91098.85 |
|         | 2007 | 73.25 | 63.67 | 9.59  | 17627.03 | 845.47  | 5.16 | 94.08  | 75.58 | 75.58 | 3.90 | 1.20 | 68.48 | 25.26 | 1.69 | 97.10 | 99.30 | 23503.71 | 91072.41 |
|         | 2008 | 74.38 | 64.51 | 9.86  | 16716.50 | 1075.41 | 6.06 | 95.20  | 19.66 | 77.81 | 4.71 | 1.25 | 68.35 | 25.47 | 1.72 | 97.10 | 99.40 | 21871.91 | 91051.92 |
|         | 2009 | 75.14 | 65.09 | 10.05 | 14282.60 | 1008.52 | 6.93 | 97.38  | 20.32 | 75.25 | 5.22 | 1.45 | 68.22 | 25.71 | 1.70 | 97.10 | 99.40 | 18815.61 | 91047.22 |
|         | 2010 | 76.23 | 65.97 | 10.26 | 14638.60 | 902.67  | 6.25 | 91.69  | 18.57 | 78.85 | 4.93 | 1.27 | 68.09 | 26.02 | 1.72 | 97.20 | 99.50 | 22767.13 | 91076.47 |
|         | 2011 | 76.50 | 66.13 | 10.37 | 15798.63 | 988.10  | 5.83 | 91.28  | 17.56 | 79.32 | 4.63 | 1.12 | 67.97 | 26.50 | 1.61 | 97.20 | 99.50 | 24378.85 | 91069.34 |
|         | 2012 | 76.53 | 66.17 | 10.36 | 16538.21 | 1077.55 | 6.36 | 97.57  | 19.15 | 80.38 | 5.12 | 1.25 | 67.84 | 27.05 | 1.56 | 97.20 | 99.50 | 23292.78 | 91091.49 |

|           |      |       |       |       |          |         |      |        |       |       |      |      |       |       |      |       |       |           |          |
|-----------|------|-------|-------|-------|----------|---------|------|--------|-------|-------|------|------|-------|-------|------|-------|-------|-----------|----------|
|           | 2013 | 77.38 | 66.85 | 10.53 | 16918.59 | 1213.56 | 6.48 | 97.84  | 20.26 | 79.28 | 5.14 | 1.34 | 67.72 | 27.65 | 1.52 | 97.20 | 99.60 | -         | 91117.57 |
|           | 2014 | 77.29 | 66.81 | 10.48 | 17453.37 | 1248.28 | 6.38 | 97.84  | 20.72 | 78.82 | 5.03 | 1.35 | 67.62 | 28.29 | 1.54 | 97.20 | 99.60 | -         | 91159.64 |
|           | 2015 | 77.45 | 66.95 | 10.49 | 17733.96 | -       | -    | -      | -     | -     | -    | -    | 67.54 | 28.94 | 1.54 | 97.20 | 99.60 | -         | 91193.92 |
|           | 2016 | 77.58 | 67.16 | 10.41 | 18085.09 | -       | -    | -      | -     | -     | -    | -    | 67.47 | 29.62 | -    | -     | -     | -         | 91231.18 |
|           | 2017 | 78.09 | 67.03 | 11.06 | -        | -       | -    | -      | -     | -     | -    | -    | -     | -     | -    | -     | -     | -         | -        |
| Ethiopia  | 1995 | 49.87 | 44.00 | 5.87  | 182.71   | 4.02    | 2.96 | 78.33  | 46.51 | 40.62 | 1.20 | 1.76 | 13.83 | 6.13  | 7.00 | 3.00  | 19.50 | 69202.10  | 88793.80 |
|           | 1996 | 50.52 | 44.57 | 5.95  | 199.01   | 4.20    | 2.92 | 78.57  | 48.60 | 38.15 | 1.11 | 1.81 | 14.01 | 6.14  | 6.94 | 3.00  | 21.40 | 71509.73  | 88778.67 |
|           | 1997 | 51.02 | 45.01 | 6.00  | 199.11   | 4.37    | 3.20 | 78.53  | 46.43 | 40.87 | 1.31 | 1.89 | 14.19 | 6.17  | 6.86 | 4.60  | 23.30 | 73810.38  | 88783.42 |
|           | 1998 | 51.46 | 45.40 | 6.05  | 186.66   | 4.50    | 3.73 | 79.49  | 44.71 | 43.76 | 1.63 | 2.10 | 14.37 | 6.18  | 6.77 | 5.90  | 25.20 | 190909.59 | 88786.00 |
|           | 1999 | 51.07 | 45.09 | 5.98  | 190.69   | 4.46    | 3.96 | 79.60  | 42.52 | 46.58 | 1.84 | 2.11 | 14.55 | 6.17  | 6.66 | 7.30  | 27.00 | 217793.99 | 88785.50 |
|           | 2000 | 51.10 | 45.13 | 5.97  | 196.50   | 5.37    | 4.36 | 79.17  | 35.95 | 54.60 | 2.38 | 1.98 | 14.74 | 6.14  | 6.53 | 8.60  | 28.90 | 183617.67 | 88802.27 |
|           | 2001 | 53.06 | 46.82 | 6.25  | 206.74   | 5.05    | 4.26 | 79.84  | 38.06 | 52.33 | 2.23 | 2.03 | 14.93 | 6.16  | 6.38 | 9.90  | 30.80 | 144657.84 | 88781.21 |
|           | 2002 | 53.84 | 47.50 | 6.34  | 203.91   | 5.26    | 4.73 | 80.30  | 37.00 | 53.92 | 2.55 | 2.18 | 15.12 | 6.15  | 6.22 | 11.20 | 32.70 | 186749.54 | 88764.84 |
|           | 2003 | 54.51 | 48.09 | 6.42  | 193.87   | 5.51    | 4.64 | 80.52  | 36.11 | 55.15 | 2.56 | 2.08 | 15.31 | 6.14  | 6.04 | 12.60 | 34.50 | 171731.66 | 88752.90 |
|           | 2004 | 55.28 | 48.76 | 6.52  | 214.04   | 5.75    | 4.23 | 80.44  | 35.35 | 56.05 | 2.37 | 1.86 | 15.50 | 6.12  | 5.87 | 13.90 | 36.40 | 175248.63 | 88753.58 |
|           | 2005 | 56.06 | 49.46 | 6.60  | 232.78   | 6.79    | 4.20 | 79.31  | 30.61 | 61.41 | 2.58 | 1.62 | 15.70 | 6.11  | 5.69 | 15.20 | 38.30 | 200010.18 | 88759.78 |
|           | 2006 | 57.02 | 50.33 | 6.69  | 251.06   | 8.65    | 4.47 | 77.31  | 33.53 | 56.63 | 2.53 | 1.94 | 15.90 | 6.16  | 5.52 | 16.50 | 40.10 | 175184.51 | 88728.65 |
|           | 2007 | 58.17 | 51.31 | 6.86  | 272.39   | 11.21   | 4.69 | 77.91  | 54.83 | 54.83 | 2.57 | 2.12 | 16.12 | 6.21  | 5.36 | 17.80 | 42.00 | 189006.75 | 88701.70 |
|           | 2008 | 59.36 | 52.34 | 7.02  | 293.85   | 13.43   | 4.28 | 79.96  | 38.47 | 51.89 | 2.22 | 2.06 | 16.51 | 6.25  | 5.20 | 19.10 | 43.90 | 175266.23 | 88692.94 |
|           | 2009 | 60.38 | 53.22 | 7.16  | 311.37   | 14.83   | 4.41 | 85.14  | 38.38 | 54.92 | 2.42 | 1.99 | 16.91 | 6.28  | 5.06 | 20.40 | 45.90 | 182032.58 | 88698.18 |
|           | 2010 | 61.28 | 54.03 | 7.25  | 341.31   | 20.98   | 6.86 | 73.53  | 33.70 | 54.17 | 3.72 | 3.14 | 17.32 | 6.32  | 4.92 | 21.70 | 47.80 | 182771.20 | 88709.06 |
|           | 2011 | 62.22 | 54.83 | 7.39  | 369.58   | 22.21   | 6.55 | 73.95  | 31.76 | 57.05 | 3.74 | 2.81 | 17.74 | 6.33  | 4.80 | 23.00 | 49.70 | 184045.88 | 88604.18 |
|           | 2012 | 63.06 | 55.58 | 7.48  | 391.13   | 26.42   | 5.77 | 77.85  | 33.18 | 57.38 | 3.31 | 2.46 | 18.16 | 6.34  | 4.68 | 24.30 | 51.60 | 185292.17 | 88501.12 |
|           | 2013 | 63.85 | 56.28 | 7.57  | 421.38   | 25.04   | 5.19 | 77.39  | 33.37 | 56.89 | 2.95 | 2.24 | 18.59 | 6.35  | 4.56 | 25.50 | 53.50 | -         | 88396.95 |
|           | 2014 | 64.62 | 56.97 | 7.66  | 452.78   | 26.65   | 4.88 | 78.14  | 32.26 | 58.71 | 2.87 | 2.02 | 19.03 | 6.35  | 4.44 | 26.80 | 55.40 | -         | 88313.87 |
|           | 2015 | 65.14 | 57.42 | 7.72  | 487.29   | -       | -    | -      | -     | -     | -    | -    | 19.47 | 6.34  | 4.32 | 28.00 | 57.30 | -         | 88234.10 |
|           | 2016 | 65.63 | 57.91 | 7.72  | 511.19   | -       | -    | -      | -     | -     | -    | -    | 19.92 | 6.33  | -    | -     | -     | -         | 88137.69 |
|           | 2017 | 68.39 | 59.53 | 8.86  | -        | -       | -    | -      | -     | -     | -    | -    | -     | -     | -    | -     | -     | -         | -        |
| Federated | 1995 | 64.15 | 56.36 | 7.79  | 2721.86  | 189.00  | 9.16 | 100.00 | 5.03  | 94.97 | 8.70 | 0.46 | 25.07 | 6.67  | 4.66 | 25.00 | 90.70 | 57.83     | 85288.32 |

|           |       |       |       |         |         |        |       |        |       |       |       |       |       |      |       |       |       |          |          |
|-----------|-------|-------|-------|---------|---------|--------|-------|--------|-------|-------|-------|-------|-------|------|-------|-------|-------|----------|----------|
| States of | 1996  | 64.35 | 56.54 | 7.81    | 2617.99 | 174.34 | 8.62  | 100.00 | 5.68  | 94.32 | 8.14  | 0.49  | 24.47 | 6.72 | 4.61  | 26.70 | 90.60 | 58.09    | 85428.24 |
|           | 1997  | 64.52 | 56.68 | 7.84    | 2455.61 | 148.43 | 7.78  | 100.00 | 6.47  | 93.53 | 7.28  | 0.50  | 23.89 | 6.80 | 4.54  | 28.40 | 90.50 | -        | 85553.34 |
|           | 1998  | 64.74 | 56.85 | 7.89    | 2534.36 | 141.22 | 6.95  | 100.00 | 6.99  | 93.01 | 6.46  | 0.49  | 23.31 | 6.85 | 4.47  | 30.10 | 90.40 | -        | 85711.61 |
|           | 1999  | 64.95 | 57.02 | 7.93    | 2579.48 | 155.35 | 7.58  | 100.00 | 6.78  | 93.22 | 7.06  | 0.51  | 22.75 | 6.81 | 4.39  | 31.90 | 90.30 | -        | 85882.72 |
|           | 2000  | 64.71 | 56.79 | 7.92    | 2706.83 | 170.94 | 7.88  | 100.00 | 6.70  | 93.30 | 7.35  | 0.53  | 22.33 | 6.65 | 4.30  | 33.60 | 90.10 | -        | 86068.37 |
|           | 2001  | 65.39 | 57.37 | 8.02    | 2760.98 | 192.22 | 8.58  | 100.00 | 6.72  | 93.28 | 8.01  | 0.58  | 22.33 | 6.79 | 4.20  | 35.60 | 90.00 | -        | 86229.28 |
|           | 2002  | 64.44 | 56.57 | 7.86    | 2782.27 | 180.66 | 8.02  | 100.00 | 7.55  | 92.45 | 7.41  | 0.61  | 22.33 | 6.90 | 4.11  | 37.50 | 90.00 | -        | 86406.98 |
|           | 2003  | 65.62 | 57.56 | 8.06    | 2840.87 | 222.27 | 9.69  | 100.00 | 6.82  | 93.18 | 9.03  | 0.66  | 22.33 | 6.95 | 4.01  | 39.50 | 89.90 | -        | 86599.77 |
|           | 2004  | 65.68 | 57.61 | 8.08    | 2758.10 | 238.52 | 10.64 | 100.00 | 6.92  | 93.08 | 9.90  | 0.74  | 22.33 | 6.99 | 3.91  | 41.40 | 89.80 | -        | 86778.08 |
|           | 2005  | 65.58 | 57.53 | 8.05    | 2824.93 | 285.13 | 12.11 | 96.50  | 6.38  | 93.39 | 11.31 | 0.80  | 22.33 | 7.00 | 3.82  | 43.40 | 89.70 | -        | 86980.58 |
|           | 2006  | 65.58 | 57.59 | 8.00    | 2834.91 | 285.47 | 11.92 | 96.89  | 7.23  | 92.54 | 11.03 | 0.89  | 22.32 | 6.89 | 3.74  | 45.30 | 89.60 | -        | 87144.77 |
|           | 2007  | 65.57 | 57.61 | 7.97    | 2795.30 | 292.11 | 11.99 | 94.06  | 92.87 | 92.87 | 11.14 | 0.85  | 22.32 | 6.76 | 3.66  | 47.30 | 89.50 | -        | 87297.93 |
|           | 2008  | 65.59 | 57.64 | 7.94    | 2749.01 | 323.33 | 12.94 | 97.54  | 9.40  | 90.37 | 11.70 | 1.25  | 22.31 | 6.65 | 3.59  | 49.20 | 89.40 | -        | 87431.98 |
|           | 2009  | 65.50 | 57.59 | 7.91    | 2795.23 | 358.12 | 13.44 | 97.54  | 9.20  | 90.57 | 12.17 | 1.27  | 22.31 | 6.55 | 3.52  | 51.20 | 89.30 | -        | 87554.32 |
|           | 2010  | 65.32 | 57.47 | 7.85    | 2861.77 | 392.41 | 13.83 | 97.54  | 8.60  | 91.18 | 12.61 | 1.22  | 22.30 | 6.49 | 3.46  | 53.10 | 89.20 | -        | 87667.79 |
|           | 2011  | 65.38 | 57.51 | 7.88    | 2961.79 | 410.81 | 13.76 | 97.54  | 8.64  | 91.14 | 12.54 | 1.22  | 22.30 | 6.53 | 3.40  | 55.10 | 89.10 | -        | 87840.59 |
|           | 2012  | 65.50 | 57.59 | 7.91    | 2901.88 | 402.08 | 12.77 | 97.54  | 9.01  | 90.76 | 11.59 | 1.18  | 22.32 | 6.59 | 3.35  | 57.00 | 89.00 | -        | 87997.67 |
|           | 2013  | 65.56 | 57.62 | 7.94    | 2784.56 | 406.49 | 13.38 | 97.54  | 9.43  | 90.33 | 12.09 | 1.29  | 22.34 | 6.70 | 3.29  | 57.00 | 89.00 | -        | 88161.19 |
| 2014      | 65.40 | 57.47 | 7.92  | 2716.32 | 414.99  | 13.71  | 97.54 | 9.06   | 90.71 | 12.43 | 1.27  | 22.38 | 6.86  | 3.24 | 57.10 | 89.00 | -     | 88304.97 |          |
| 2015      | 65.26 | 57.35 | 7.92  | 2838.87 | -       | -      | -     | -      | -     | -     | -     | 22.42 | 7.07  | 3.19 | 57.10 | 89.00 | -     | 88471.03 |          |
| 2016      | 65.50 | 57.51 | 7.99  | 2823.43 | -       | -      | -     | -      | -     | -     | -     | 22.48 | 7.39  | -    | -     | -     | -     | -        | 88622.70 |
| 2017      | 67.21 | 58.23 | 8.98  | -       | -       | -      | -     | -      | -     | -     | -     | -     | -     | -    | -     | -     | -     | -        | -        |
| Fiji      | 1995  | 64.49 | 56.36 | 8.13    | 3122.91 | 79.11  | 3.11  | 63.49  | 13.25 | 79.13 | 2.46  | 0.65  | 45.50 | 5.00 | 3.28  | 66.30 | 88.30 | 2182.20  | 86676.31 |
|           | 1996  | 64.32 | 56.21 | 8.11    | 3235.36 | 88.82  | 3.27  | 63.49  | 12.20 | 80.79 | 2.64  | 0.63  | 46.28 | 5.13 | 3.24  | 68.10 | 88.80 | 2222.89  | 86922.39 |
|           | 1997  | 64.08 | 56.00 | 8.08    | 3130.72 | 93.28  | 3.53  | 63.49  | 11.49 | 81.90 | 2.89  | 0.64  | 46.73 | 5.25 | 3.21  | 69.80 | 89.30 | 2217.20  | 87177.87 |
|           | 1998  | 64.09 | 56.01 | 8.09    | 3141.88 | 65.93  | 3.18  | 63.49  | 11.57 | 81.78 | 2.60  | 0.58  | 47.12 | 5.36 | 3.17  | 71.40 | 89.70 | 2322.71  | 87426.48 |
|           | 1999  | 64.01 | 55.92 | 8.09    | 3392.17 | 75.73  | 3.14  | 63.49  | 12.91 | 79.67 | 2.51  | 0.64  | 47.52 | 5.47 | 3.13  | 73.00 | 90.20 | 2090.80  | 87675.41 |
|           | 2000  | 64.18 | 56.02 | 8.16    | 3315.07 | 80.31  | 3.87  | 63.49  | 10.39 | 83.63 | 3.24  | 0.63  | 47.91 | 5.58 | 3.09  | 74.60 | 90.70 | 1574.68  | 87923.84 |
|           | 2001  | 64.37 | 56.20 | 8.17    | 3368.93 | 66.91  | 3.28  | 63.49  | 12.64 | 80.09 | 2.63  | 0.65  | 48.30 | 5.69 | 3.05  | 76.20 | 91.10 | 1639.36  | 88115.83 |

|      |       |       |      |         |        |      |       |       |       |      |      |       |      |      |       |       |         |          |
|------|-------|-------|------|---------|--------|------|-------|-------|-------|------|------|-------|------|------|-------|-------|---------|----------|
| 2002 | 64.54 | 56.35 | 8.19 | 3470.46 | 78.66  | 3.48 | 63.49 | 11.43 | 81.99 | 2.85 | 0.63 | 48.69 | 5.81 | 3.00 | 77.70 | 91.60 | 1807.00 | 88291.78 |
| 2003 | 64.61 | 56.41 | 8.20 | 3501.14 | 95.08  | 3.35 | 63.49 | 12.35 | 80.55 | 2.70 | 0.65 | 49.09 | 5.95 | 2.95 | 79.30 | 92.00 | 1931.69 | 88488.75 |
| 2004 | 64.70 | 56.49 | 8.21 | 3678.93 | 120.25 | 3.61 | 63.49 | 12.67 | 80.04 | 2.89 | 0.72 | 49.48 | 6.11 | 2.91 | 80.80 | 92.50 | 1810.48 | 88686.66 |
| 2005 | 64.76 | 56.54 | 8.21 | 3689.07 | 132.00 | 3.61 | 63.49 | 11.82 | 81.38 | 2.94 | 0.67 | 49.87 | 6.29 | 2.86 | 82.30 | 92.90 | 1836.07 | 88889.36 |
| 2006 | 64.74 | 56.55 | 8.18 | 3732.00 | 143.85 | 3.84 | 63.17 | 13.56 | 78.53 | 3.01 | 0.82 | 50.26 | 6.51 | 2.82 | 83.80 | 93.40 | 1945.97 | 88869.25 |
| 2007 | 64.74 | 56.58 | 8.16 | 3667.45 | 152.57 | 3.74 | 60.82 | 74.65 | 74.65 | 2.79 | 0.95 | 50.66 | 6.71 | 2.77 | 85.30 | 93.80 | 2097.70 | 88864.36 |
| 2008 | 64.78 | 56.62 | 8.15 | 3667.86 | 153.71 | 3.68 | 63.38 | 15.48 | 75.58 | 2.78 | 0.90 | 51.05 | 6.92 | 2.74 | 86.80 | 94.30 | 2123.96 | 88872.96 |
| 2009 | 64.87 | 56.71 | 8.17 | 3580.40 | 143.49 | 4.26 | 72.47 | 22.20 | 69.37 | 2.95 | 1.30 | 51.44 | 7.11 | 2.70 | 88.20 | 94.70 | 2336.07 | 88898.62 |
| 2010 | 65.17 | 56.93 | 8.24 | 3651.97 | 154.40 | 4.23 | 65.82 | 19.66 | 70.13 | 2.97 | 1.26 | 51.83 | 7.30 | 2.67 | 89.60 | 95.10 | 2163.92 | 88919.57 |
| 2011 | 65.36 | 57.12 | 8.24 | 3719.89 | 170.51 | 4.06 | 64.72 | 22.00 | 66.01 | 2.68 | 1.38 | 52.21 | 7.63 | 2.64 | 91.00 | 95.60 | 2213.24 | 88990.47 |
| 2012 | 65.30 | 57.10 | 8.20 | 3744.28 | 183.38 | 4.16 | 64.55 | 21.73 | 66.34 | 2.76 | 1.40 | 52.60 | 7.95 | 2.62 | 91.10 | 95.60 | 2258.17 | 89065.54 |
| 2013 | 65.36 | 57.18 | 8.18 | 3894.26 | 186.64 | 4.26 | 64.55 | 20.60 | 68.08 | 2.90 | 1.36 | 52.98 | 8.28 | 2.59 | 91.10 | 95.60 | -       | 89140.99 |
| 2014 | 65.37 | 57.19 | 8.17 | 4084.20 | 204.01 | 4.49 | 67.26 | 23.00 | 65.81 | 2.95 | 1.53 | 53.35 | 8.60 | 2.57 | 91.10 | 95.70 | -       | 89222.23 |
| 2015 | 65.37 | 57.20 | 8.17 | 4211.06 | -      | -    | -     | -     | -     | -    | -    | 53.73 | 8.91 | 2.54 | 91.10 | 95.70 | -       | 89314.17 |
| 2016 | 65.38 | 57.21 | 8.17 | 4195.97 | -      | -    | -     | -     | -     | -    | -    | 54.10 | 9.23 | -    | -     | -     | -       | 89405.00 |
| 2017 | 68.07 | 59.14 | 8.94 | -       | -      | -    | -     | -     | -     | -    | -    | -     | -    | -    | -     | -     | -       | -        |

|         |      |       |       |       |          |         |      |       |       |       |      |      |       |       |      |       |        |          |          |
|---------|------|-------|-------|-------|----------|---------|------|-------|-------|-------|------|------|-------|-------|------|-------|--------|----------|----------|
| Finland | 1995 | 76.70 | 66.41 | 10.29 | 31997.00 | 2014.08 | 7.85 | 79.99 | 22.65 | 71.69 | 5.63 | 2.22 | 80.96 | 21.41 | 1.81 | 97.30 | 100.00 | 77426.36 | 91558.28 |
|         | 1996 | 76.86 | 66.55 | 10.31 | 33059.10 | 2014.75 | 8.03 | 79.85 | 22.66 | 71.62 | 5.75 | 2.28 | 81.22 | 21.67 | 1.76 | 97.30 | 100.00 | 83954.85 | 91584.25 |
|         | 1997 | 77.09 | 66.73 | 10.36 | 35021.59 | 1848.77 | 7.71 | 79.42 | 22.15 | 72.11 | 5.56 | 2.15 | 81.47 | 21.88 | 1.75 | 97.40 | 100.00 | 82093.03 | 91624.80 |
|         | 1998 | 77.29 | 66.89 | 10.40 | 36824.85 | 1853.03 | 7.35 | 78.53 | 21.62 | 72.47 | 5.33 | 2.02 | 81.71 | 22.06 | 1.70 | 97.40 | 100.00 | 77932.97 | 91671.40 |
|         | 1999 | 77.49 | 67.05 | 10.44 | 38372.22 | 1862.53 | 7.37 | 78.38 | 22.37 | 71.46 | 5.27 | 2.10 | 81.95 | 22.23 | 1.73 | 97.40 | 100.00 | 76491.33 | 91731.82 |
|         | 2000 | 77.81 | 67.28 | 10.53 | 40450.37 | 1700.32 | 7.22 | 77.65 | 22.32 | 71.26 | 5.14 | 2.07 | 82.18 | 22.42 | 1.73 | 97.40 | 100.00 | 75117.48 | 91792.17 |
|         | 2001 | 78.14 | 67.54 | 10.60 | 41399.94 | 1786.26 | 7.43 | 77.73 | 21.79 | 71.97 | 5.34 | 2.08 | 82.37 | 22.73 | 1.73 | 97.40 | 100.00 | 80288.02 | 91838.88 |
|         | 2002 | 78.39 | 67.73 | 10.67 | 41993.69 | 2032.23 | 7.81 | 77.22 | 21.27 | 72.45 | 5.66 | 2.15 | 82.50 | 23.06 | 1.72 | 97.50 | 100.00 | 83951.85 | 91884.05 |
|         | 2003 | 78.56 | 67.84 | 10.72 | 42729.02 | 2571.71 | 8.15 | 76.76 | 20.90 | 72.78 | 5.93 | 2.22 | 82.64 | 23.40 | 1.76 | 97.50 | 100.00 | 95013.03 | 91922.90 |
|         | 2004 | 78.74 | 67.95 | 10.79 | 44277.84 | 2974.00 | 8.21 | 76.78 | 20.50 | 73.30 | 6.02 | 2.19 | 82.77 | 23.74 | 1.80 | 97.50 | 100.00 | 88571.16 | 91949.02 |
|         | 2005 | 78.98 | 68.11 | 10.87 | 45353.26 | 3151.84 | 8.43 | 76.63 | 20.07 | 73.81 | 6.22 | 2.21 | 82.91 | 24.05 | 1.80 | 97.50 | 100.00 | 76199.79 | 91996.09 |
|         | 2006 | 79.18 | 68.30 | 10.87 | 47011.66 | 3316.63 | 8.38 | 75.72 | 18.99 | 74.92 | 6.28 | 2.10 | 83.04 | 24.32 | 1.84 | 97.50 | 100.00 | 88152.98 | 92012.09 |
|         | 2007 | 79.38 | 68.50 | 10.89 | 49239.19 | 3775.58 | 8.09 | 75.31 | 74.53 | 74.53 | 6.03 | 2.06 | 83.17 | 24.55 | 1.83 | 97.50 | 100.00 | 85742.23 | 92023.68 |

|      |       |       |       |          |         |      |       |       |       |      |      |       |       |      |       |        |          |          |
|------|-------|-------|-------|----------|---------|------|-------|-------|-------|------|------|-------|-------|------|-------|--------|----------|----------|
| 2008 | 79.62 | 68.71 | 10.91 | 49363.70 | 4287.02 | 8.35 | 75.29 | 18.93 | 74.86 | 6.25 | 2.10 | 83.30 | 24.83 | 1.85 | 97.50 | 100.00 | 78384.73 | 92033.84 |
| 2009 | 79.80 | 68.89 | 10.92 | 45065.75 | 4136.66 | 9.20 | 74.70 | 18.72 | 74.94 | 6.90 | 2.31 | 83.43 | 25.29 | 1.86 | 97.60 | 100.00 | 74993.89 | 92038.63 |
| 2010 | 80.03 | 69.09 | 10.93 | 46202.42 | 4001.33 | 9.05 | 75.74 | 19.31 | 74.50 | 6.74 | 2.31 | 83.56 | 26.01 | 1.87 | 97.60 | 100.00 | 84371.54 | 92045.53 |
| 2011 | 80.32 | 69.34 | 10.97 | 47171.02 | 4398.94 | 9.01 | 75.08 | 18.81 | 74.94 | 6.75 | 2.26 | 83.69 | 26.97 | 1.83 | 97.60 | 100.00 | 76124.63 | 92058.87 |
| 2012 | 80.57 | 69.56 | 11.01 | 46277.56 | 4254.76 | 9.30 | 74.33 | 18.04 | 75.72 | 7.04 | 2.26 | 83.82 | 28.15 | 1.80 | 97.60 | 100.00 | 69072.94 | 92088.02 |
| 2013 | 80.93 | 69.86 | 11.07 | 45715.65 | 4518.97 | 9.55 | 74.13 | 18.19 | 75.46 | 7.20 | 2.34 | 83.95 | 29.48 | 1.75 | 97.60 | 100.00 | -        | 92115.46 |
| 2014 | 81.27 | 70.13 | 11.13 | 45239.37 | 4612.29 | 9.68 | 73.84 | 18.23 | 75.31 | 7.29 | 2.39 | 84.09 | 30.79 | 1.71 | 97.60 | 100.00 | -        | 92151.43 |
| 2015 | 81.53 | 70.36 | 11.17 | 45086.74 | -       | -    | -     | -     | -     | -    | -    | 84.22 | 31.99 | 1.71 | 97.60 | 100.00 | -        | 92180.50 |
| 2016 | 81.74 | 70.53 | 11.21 | 45825.49 | -       | -    | -     | -     | -     | -    | -    | 84.36 | 33.07 | -    | -     | -      | -        | 92214.29 |
| 2017 | 81.42 | 69.78 | 11.64 | -        | -       | -    | -     | -     | -     | -    | -    | -     | -     | -    | -     | -      | -        | -        |

|        |      |       |       |       |          |         |       |       |       |       |      |      |       |       |      |       |        |           |          |
|--------|------|-------|-------|-------|----------|---------|-------|-------|-------|-------|------|------|-------|-------|------|-------|--------|-----------|----------|
| France | 1995 | 78.12 | 68.28 | 9.84  | 34145.70 | 2744.52 | 10.11 | 37.43 | 7.60  | 79.69 | 8.06 | 2.05 | 74.91 | 23.08 | 1.74 | 98.70 | 100.00 | 543013.14 | 90411.35 |
|        | 1996 | 78.33 | 68.48 | 9.86  | 34497.29 | 2741.66 | 10.11 | 35.83 | 7.32  | 79.56 | 8.04 | 2.07 | 75.08 | 23.43 | 1.75 | 98.70 | 100.00 | 572529.08 | 90437.62 |
|        | 1997 | 78.65 | 68.75 | 9.90  | 35178.94 | 2439.59 | 9.98  | 35.33 | 7.19  | 79.64 | 7.94 | 2.03 | 75.25 | 23.76 | 1.77 | 98.70 | 100.00 | 565220.99 | 90464.51 |
|        | 1998 | 78.77 | 68.86 | 9.91  | 36295.93 | 2486.68 | 9.86  | 34.74 | 7.12  | 79.52 | 7.84 | 2.02 | 75.42 | 24.07 | 1.78 | 98.70 | 100.00 | 577851.54 | 90486.41 |
|        | 1999 | 78.92 | 69.00 | 9.92  | 37339.98 | 2458.13 | 9.86  | 34.86 | 7.16  | 79.45 | 7.83 | 2.03 | 75.61 | 24.33 | 1.81 | 98.70 | 100.00 | 563699.03 | 90497.91 |
|        | 2000 | 79.12 | 69.16 | 9.96  | 38522.21 | 2209.24 | 9.77  | 34.44 | 7.10  | 79.38 | 7.76 | 2.02 | 75.87 | 24.55 | 1.89 | 98.70 | 100.00 | 559922.20 | 90520.78 |
|        | 2001 | 79.35 | 69.37 | 9.99  | 38990.31 | 2241.06 | 9.89  | 34.79 | 7.17  | 79.38 | 7.85 | 2.04 | 76.13 | 24.77 | 1.90 | 98.70 | 100.00 | 565204.33 | 90519.21 |
|        | 2002 | 79.59 | 69.58 | 10.01 | 39140.71 | 2496.52 | 10.22 | 34.28 | 6.97  | 79.66 | 8.14 | 2.08 | 76.38 | 24.95 | 1.88 | 98.70 | 100.00 | 557850.13 | 90531.18 |
|        | 2003 | 79.77 | 69.74 | 10.03 | 39182.78 | 3115.24 | 10.43 | 32.20 | 7.10  | 77.94 | 8.13 | 2.30 | 76.63 | 25.10 | 1.89 | 98.70 | 100.00 | 564607.18 | 90543.81 |
|        | 2004 | 80.15 | 70.05 | 10.10 | 39979.12 | 3592.42 | 10.53 | 31.51 | 6.96  | 77.90 | 8.21 | 2.33 | 76.88 | 25.21 | 1.92 | 98.70 | 100.00 | 560648.84 | 90550.45 |
|        | 2005 | 80.40 | 70.26 | 10.14 | 40316.81 | 3721.11 | 10.60 | 32.15 | 7.08  | 77.99 | 8.27 | 2.33 | 77.13 | 25.27 | 1.94 | 98.70 | 100.00 | 557130.13 | 90562.45 |
|        | 2006 | 80.67 | 70.45 | 10.22 | 40987.55 | 3871.53 | 10.53 | 33.16 | 7.42  | 77.62 | 8.17 | 2.36 | 77.38 | 25.34 | 2.00 | 98.70 | 100.00 | 547361.38 | 90615.05 |
|        | 2007 | 80.91 | 70.61 | 10.29 | 41696.69 | 4371.97 | 10.45 | 32.86 | 77.69 | 77.69 | 8.12 | 2.33 | 77.62 | 25.35 | 1.98 | 98.70 | 100.00 | 540947.14 | 90684.41 |
|        | 2008 | 81.08 | 70.72 | 10.36 | 41545.29 | 4827.88 | 10.57 | 33.55 | 7.62  | 77.29 | 8.17 | 2.40 | 77.86 | 25.38 | 2.01 | 98.70 | 100.00 | 544424.06 | 90760.38 |
|        | 2009 | 81.29 | 70.85 | 10.44 | 40116.38 | 4722.01 | 11.28 | 33.38 | 7.50  | 77.54 | 8.75 | 2.53 | 78.11 | 25.56 | 2.00 | 98.70 | 100.00 | 527525.78 | 90843.52 |
|        | 2010 | 81.48 | 70.97 | 10.52 | 40703.34 | 4583.69 | 11.20 | 33.14 | 7.45  | 77.51 | 8.68 | 2.52 | 78.35 | 25.96 | 2.03 | 98.70 | 100.00 | 532133.04 | 90952.33 |
|        | 2011 | 81.71 | 71.16 | 10.55 | 41349.19 | 4993.72 | 11.33 | 30.83 | 6.69  | 77.03 | 8.73 | 2.46 | 78.58 | 26.55 | 2.01 | 98.70 | 100.00 | 502656.65 | 91030.60 |
|        | 2012 | 81.84 | 71.28 | 10.56 | 41224.73 | 4698.92 | 11.44 | 29.98 | 6.51  | 77.16 | 8.83 | 2.48 | 78.82 | 27.34 | 2.01 | 98.70 | 100.00 | 499146.63 | 91125.87 |
|        | 2013 | 82.01 | 71.42 | 10.59 | 41249.45 | 4955.35 | 11.56 | 29.32 | 6.35  | 77.08 | 8.91 | 2.50 | 79.06 | 28.28 | 1.99 | 98.70 | 100.00 | -         | 91224.44 |

|               |      |       |       |       |          |         |       |       |       |       |      |      |       |       |      |       |        |          |          |
|---------------|------|-------|-------|-------|----------|---------|-------|-------|-------|-------|------|------|-------|-------|------|-------|--------|----------|----------|
|               | 2014 | 82.22 | 71.59 | 10.63 | 41431.04 | 4958.99 | 11.54 | 29.08 | 6.34  | 78.21 | 9.02 | 2.52 | 79.29 | 29.25 | 2.01 | 98.70 | 100.00 | -        | 91342.56 |
|               | 2015 | 82.27 | 71.64 | 10.63 | 41689.71 | -       | -     | -     | -     | -     | -    | -    | 79.52 | 30.16 | 2.01 | 98.70 | 100.00 | -        | 91468.33 |
|               | 2016 | 82.34 | 71.71 | 10.64 | 42013.29 | -       | -     | -     | -     | -     | -    | -    | 79.75 | 30.96 | -    | -     | -      | -        | 91598.52 |
|               | 2017 | 82.84 | 71.75 | 11.09 | -        | -       | -     | -     | -     | -     | -    | -    | -     | -     | -    | -     | -      | -        | -        |
| <b>Gabon</b>  | 1995 | 59.59 | 51.73 | 7.87  | 11342.21 | 158.98  | 3.48  | 83.48 | 53.34 | 36.10 | 1.26 | 2.23 | 75.36 | 11.38 | 5.00 | 38.30 | 80.00  | 13230.37 | 90064.50 |
|               | 1996 | 59.25 | 51.47 | 7.79  | 11459.46 | 173.48  | 3.40  | 83.48 | 51.87 | 37.87 | 1.29 | 2.11 | 76.43 | 11.35 | 4.90 | 38.30 | 80.60  | 13569.32 | 90025.54 |
|               | 1997 | 59.63 | 51.77 | 7.86  | 11816.54 | 140.00  | 3.01  | 83.48 | 50.38 | 39.66 | 1.19 | 1.81 | 77.44 | 11.28 | 4.81 | 38.30 | 81.20  | 12977.43 | 89996.42 |
|               | 1998 | 59.61 | 51.75 | 7.86  | 11925.78 | 162.18  | 4.24  | 83.48 | 49.42 | 40.80 | 1.73 | 2.51 | 78.38 | 11.19 | 4.72 | 38.40 | 81.80  | 38130.03 | 89971.80 |
|               | 1999 | 59.37 | 51.55 | 7.82  | 10593.24 | 136.52  | 3.52  | 83.48 | 54.69 | 34.49 | 1.21 | 2.31 | 79.26 | 11.08 | 4.63 | 38.60 | 82.80  | 35739.95 | 89938.86 |
|               | 2000 | 59.11 | 51.32 | 7.78  | 10137.55 | 118.89  | 2.89  | 83.48 | 50.11 | 39.97 | 1.15 | 1.73 | 80.08 | 10.94 | 4.54 | 38.80 | 83.80  | 32923.10 | 89927.99 |
|               | 2001 | 58.82 | 51.12 | 7.70  | 10098.60 | 128.61  | 3.23  | 83.48 | 50.25 | 39.81 | 1.29 | 1.94 | 80.85 | 10.77 | 4.46 | 39.00 | 84.70  | 13751.40 | 89898.50 |
|               | 2002 | 59.17 | 51.40 | 7.77  | 9823.25  | 132.58  | 3.22  | 83.48 | 52.17 | 37.51 | 1.21 | 2.01 | 81.57 | 10.57 | 4.39 | 39.20 | 85.60  | 12656.01 | 89886.43 |
|               | 2003 | 59.21 | 51.45 | 7.76  | 9788.88  | 171.49  | 3.48  | 83.48 | 48.27 | 42.18 | 1.47 | 2.01 | 82.23 | 10.35 | 4.33 | 39.40 | 86.40  | 14728.79 | 89871.57 |
|               | 2004 | 59.24 | 51.51 | 7.73  | 9595.85  | 187.36  | 3.26  | 83.48 | 48.59 | 41.80 | 1.36 | 1.89 | 82.85 | 10.12 | 4.27 | 39.60 | 87.20  | 15137.54 | 89868.59 |
|               | 2005 | 59.92 | 52.01 | 7.91  | 9579.36  | 189.15  | 2.76  | 83.48 | 49.70 | 40.47 | 1.11 | 1.64 | 83.42 | 9.89  | 4.23 | 39.80 | 87.90  | 14185.92 | 89883.76 |
|               | 2006 | 60.44 | 52.46 | 7.98  | 9041.67  | 207.71  | 2.88  | 83.48 | 47.71 | 42.85 | 1.24 | 1.65 | 83.95 | 9.63  | 4.19 | 40.00 | 88.60  | 13966.24 | 89892.11 |
|               | 2007 | 61.14 | 53.01 | 8.12  | 9299.46  | 246.75  | 2.86  | 83.48 | 44.33 | 44.33 | 1.27 | 1.59 | 84.44 | 9.36  | 4.16 | 40.30 | 89.30  | 13080.54 | 89902.84 |
|               | 2008 | 61.41 | 53.26 | 8.14  | 8715.46  | 266.86  | 2.54  | 83.48 | 48.05 | 42.44 | 1.08 | 1.46 | 84.90 | 9.10  | 4.14 | 40.50 | 89.90  | 61809.41 | 89918.88 |
|               | 2009 | 61.96 | 53.72 | 8.24  | 8449.94  | 276.35  | 3.43  | 83.48 | 45.78 | 45.16 | 1.55 | 1.88 | 85.31 | 8.84  | 4.11 | 40.70 | 90.50  | 14325.64 | 89948.12 |
|               | 2010 | 62.80 | 54.41 | 8.39  | 8754.11  | 319.74  | 3.41  | 67.36 | 18.39 | 71.67 | 2.44 | 0.93 | 85.70 | 8.59  | 4.08 | 40.90 | 91.10  | 34053.55 | 89981.40 |
|               | 2011 | 63.22 | 54.77 | 8.45  | 9060.66  | 353.00  | 3.12  | 70.98 | 23.17 | 67.36 | 2.10 | 1.02 | 86.05 | 8.37  | 4.05 | 41.20 | 91.60  | 34324.76 | 89970.43 |
|               | 2012 | 63.84 | 55.30 | 8.53  | 9212.29  | 343.24  | 3.13  | 71.45 | 21.02 | 70.58 | 2.21 | 0.92 | 86.37 | 8.16  | 4.01 | 41.40 | 92.20  | 34570.63 | 89957.09 |
|               | 2013 | 64.48 | 55.85 | 8.63  | 9408.01  | 380.26  | 3.98  | 78.98 | 20.85 | 73.60 | 2.93 | 1.05 | 86.66 | 7.95  | 3.96 | 41.60 | 92.70  | -        | 89954.44 |
|               | 2014 | 65.24 | 56.49 | 8.76  | 9508.15  | 321.33  | 3.44  | 69.17 | 21.87 | 68.38 | 2.35 | 1.09 | 86.92 | 7.75  | 3.91 | 41.80 | 93.20  | -        | 89952.01 |
|               | 2015 | 65.92 | 57.04 | 8.87  | 9598.30  | -       | -     | -     | -     | -     | -    | -    | 87.16 | 7.56  | 3.85 | 41.90 | 93.20  | -        | 89951.22 |
|               | 2016 | 66.53 | 57.58 | 8.94  | 9569.45  | -       | -     | -     | -     | -     | -    | -    | 87.37 | 7.51  | -    | -     | -      | -        | 89959.82 |
|               | 2017 | 68.39 | 58.74 | 9.66  | -        | -       | -     | -     | -     | -     | -    | -    | -     | -     | -    | -     | -      | -        | -        |
| <b>Gambia</b> | 1995 | 62.66 | 54.12 | 8.54  | 491.59   | 24.03   | 3.26  | 53.64 | 36.50 | 31.96 | 1.04 | 2.22 | 43.36 | 5.45  | 6.04 | 60.30 | 79.30  | 1244.17  | 87832.44 |
|               | 1996 | 62.85 | 54.30 | 8.55  | 488.56   | 26.06   | 3.37  | 53.79 | 39.47 | 26.62 | 0.90 | 2.47 | 44.26 | 5.44  | 6.02 | 60.30 | 80.00  | 1240.74  | 87831.37 |

|      |       |       |      |        |       |      |       |       |       |      |      |       |      |      |       |       |         |          |
|------|-------|-------|------|--------|-------|------|-------|-------|-------|------|------|-------|------|------|-------|-------|---------|----------|
| 1997 | 62.84 | 54.30 | 8.54 | 498.20 | 22.21 | 3.11 | 53.63 | 37.76 | 29.58 | 0.92 | 2.19 | 45.16 | 5.41 | 6.00 | 60.10 | 80.70 | 1251.17 | 87847.28 |
| 1998 | 63.19 | 54.60 | 8.59 | 501.08 | 25.64 | 3.54 | 53.72 | 35.57 | 33.79 | 1.19 | 2.34 | 46.06 | 5.38 | 5.98 | 60.00 | 81.30 | 2088.65 | 87867.87 |
| 1999 | 63.17 | 54.60 | 8.57 | 517.78 | 24.34 | 3.56 | 53.70 | 34.83 | 35.15 | 1.25 | 2.31 | 46.96 | 5.33 | 5.97 | 59.80 | 82.00 | 2714.85 | 87900.52 |
| 2000 | 63.30 | 54.70 | 8.60 | 530.10 | 23.02 | 3.61 | 53.74 | 35.37 | 34.17 | 1.23 | 2.38 | 47.87 | 5.28 | 5.95 | 59.70 | 82.70 | 2864.99 | 87933.85 |
| 2001 | 63.56 | 54.94 | 8.62 | 543.78 | 20.12 | 3.71 | 53.60 | 31.14 | 41.90 | 1.55 | 2.15 | 48.78 | 5.21 | 5.93 | 59.60 | 83.30 | 3730.61 | 87920.38 |
| 2002 | 63.49 | 54.90 | 8.59 | 509.72 | 16.59 | 3.75 | 53.72 | 33.56 | 37.52 | 1.41 | 2.34 | 49.68 | 5.12 | 5.91 | 59.50 | 84.00 | 3407.84 | 87937.35 |
| 2003 | 63.95 | 55.26 | 8.69 | 527.50 | 15.22 | 4.22 | 51.18 | 25.42 | 50.34 | 2.12 | 2.10 | 50.59 | 5.04 | 5.88 | 59.40 | 84.60 | 2438.47 | 87946.87 |
| 2004 | 64.21 | 55.47 | 8.74 | 546.77 | 18.06 | 4.35 | 48.23 | 20.36 | 57.79 | 2.51 | 1.84 | 51.48 | 4.97 | 5.86 | 59.30 | 85.20 | 3115.45 | 87977.16 |
| 2005 | 64.25 | 55.51 | 8.75 | 524.51 | 21.52 | 4.97 | 49.27 | 20.53 | 58.34 | 2.90 | 2.07 | 52.34 | 4.93 | 5.84 | 59.20 | 85.90 | 3001.60 | 88004.75 |
| 2006 | 64.48 | 55.72 | 8.76 | 513.75 | 24.32 | 5.52 | 50.06 | 20.65 | 58.75 | 3.24 | 2.28 | 53.18 | 4.93 | 5.81 | 59.10 | 86.50 | 3751.61 | 88031.14 |
| 2007 | 64.48 | 55.74 | 8.75 | 515.77 | 29.96 | 5.76 | 50.69 | 59.07 | 59.07 | 3.40 | 2.36 | 54.00 | 4.95 | 5.79 | 59.00 | 87.10 | 4029.42 | 88065.00 |
| 2008 | 64.89 | 56.08 | 8.81 | 528.37 | 36.19 | 5.95 | 51.20 | 20.83 | 59.32 | 3.53 | 2.42 | 54.79 | 4.96 | 5.76 | 58.90 | 87.70 | 3350.44 | 88102.45 |
| 2009 | 65.10 | 56.26 | 8.84 | 544.96 | 32.15 | 5.85 | 51.61 | 20.89 | 59.53 | 3.48 | 2.37 | 55.56 | 4.95 | 5.74 | 58.90 | 88.30 | 3012.98 | 88158.59 |
| 2010 | 65.52 | 56.62 | 8.90 | 562.48 | 32.33 | 5.75 | 51.96 | 20.94 | 59.70 | 3.43 | 2.32 | 56.30 | 4.89 | 5.71 | 58.80 | 88.90 | 3481.57 | 88210.02 |
| 2011 | 65.96 | 57.00 | 8.96 | 521.61 | 32.27 | 6.24 | 52.26 | 20.98 | 59.85 | 3.74 | 2.51 | 57.01 | 4.83 | 5.68 | 58.80 | 89.50 | 3505.92 | 88296.12 |
| 2012 | 66.27 | 57.28 | 8.99 | 533.78 | 30.92 | 6.12 | 52.52 | 21.02 | 59.97 | 3.67 | 2.45 | 57.71 | 4.73 | 5.64 | 58.70 | 90.10 | 3529.23 | 88376.68 |
| 2013 | 66.51 | 57.51 | 9.00 | 542.13 | 30.99 | 6.49 | 54.67 | 19.45 | 64.42 | 4.18 | 2.31 | 58.37 | 4.62 | 5.60 | 58.80 | 90.10 | -       | 88464.24 |
| 2014 | 66.73 | 57.71 | 9.02 | 530.32 | 30.72 | 7.34 | 54.53 | 17.05 | 68.74 | 5.05 | 2.29 | 59.02 | 4.54 | 5.54 | 58.80 | 90.20 | -       | 88575.08 |
| 2015 | 67.04 | 57.99 | 9.05 | 536.41 | -     | -    | -     | -     | -     | -    | -    | 59.63 | 4.48 | 5.49 | 58.90 | 90.20 | -       | 88666.83 |
| 2016 | 67.34 | 58.27 | 9.07 | 531.92 | -     | -    | -     | -     | -     | -    | -    | 60.22 | 4.47 | -    | -     | -     | -       | 88787.83 |
| 2017 | 65.77 | 56.72 | 9.05 | -      | -     | -    | -     | -     | -     | -    | -    | -     | -    | -    | -     | -     | -       | -        |

|         |      |       |       |      |         |       |      |        |       |       |      |      |       |       |      |       |       |          |          |
|---------|------|-------|-------|------|---------|-------|------|--------|-------|-------|------|------|-------|-------|------|-------|-------|----------|----------|
| Georgia | 1995 | 70.55 | 62.27 | 8.28 | 1010.25 | 29.58 | 5.12 | 100.00 | 94.78 | 5.22  | 0.27 | 4.86 | 53.84 | 17.74 | 1.88 | 97.80 | 85.80 | 13616.27 | 91443.64 |
|         | 1996 | 71.27 | 62.88 | 8.39 | 1152.09 | 45.98 | 7.49 | 100.00 | 88.33 | 11.67 | 0.87 | 6.62 | 53.60 | 18.24 | 1.81 | 97.70 | 86.50 | 12931.43 | 91592.78 |
|         | 1997 | 71.42 | 63.03 | 8.38 | 1297.02 | 57.00 | 7.99 | 99.93  | 81.28 | 18.66 | 1.49 | 6.50 | 53.36 | 18.51 | 1.75 | 97.60 | 87.20 | 12076.96 | 91752.61 |
|         | 1998 | 71.47 | 63.11 | 8.36 | 1350.50 | 48.68 | 6.55 | 99.89  | 81.65 | 18.26 | 1.20 | 5.35 | 53.12 | 18.64 | 1.69 | 96.90 | 87.90 | 11244.97 | 91889.10 |
|         | 1999 | 71.62 | 63.27 | 8.35 | 1400.10 | 36.70 | 6.29 | 99.83  | 81.74 | 18.12 | 1.14 | 5.15 | 52.88 | 18.81 | 1.64 | 96.30 | 88.60 | 10982.37 | 92026.92 |
|         | 2000 | 71.81 | 63.46 | 8.36 | 1436.88 | 44.99 | 6.94 | 99.43  | 82.51 | 17.01 | 1.18 | 5.76 | 52.64 | 19.10 | 1.61 | 95.70 | 89.30 | 11554.31 | 92133.30 |
|         | 2001 | 72.09 | 63.69 | 8.41 | 1516.88 | 54.02 | 7.82 | 87.88  | 72.27 | 17.76 | 1.39 | 6.43 | 52.40 | 19.67 | 1.59 | 95.00 | 90.00 | 9788.14  | 92141.87 |
|         | 2002 | 71.95 | 63.58 | 8.37 | 1610.71 | 64.33 | 8.72 | 84.80  | 71.19 | 16.05 | 1.40 | 7.32 | 52.29 | 20.35 | 1.59 | 94.40 | 90.80 | 20647.47 | 92144.38 |

|      |       |       |       |         |        |       |       |       |       |      |      |       |       |      |       |        |          |          |
|------|-------|-------|-------|---------|--------|-------|-------|-------|-------|------|------|-------|-------|------|-------|--------|----------|----------|
| 2003 | 71.82 | 63.51 | 8.31  | 1812.11 | 74.42  | 8.49  | 90.47 | 77.06 | 14.82 | 1.26 | 7.23 | 52.35 | 21.03 | 1.60 | 93.70 | 91.50  | 9653.44  | 92150.72 |
| 2004 | 71.69 | 63.40 | 8.29  | 1943.56 | 96.98  | 8.53  | 91.40 | 77.40 | 15.32 | 1.31 | 7.22 | 52.41 | 21.50 | 1.63 | 93.10 | 92.30  | 10168.48 | 92167.66 |
| 2005 | 72.08 | 63.67 | 8.41  | 2158.09 | 123.40 | 8.60  | 95.05 | 76.83 | 19.17 | 1.65 | 6.95 | 52.47 | 21.68 | 1.66 | 92.50 | 93.00  | 11190.17 | 92156.15 |
| 2006 | 72.45 | 63.95 | 8.51  | 2391.41 | 147.35 | 8.39  | 91.54 | 72.22 | 21.11 | 1.77 | 6.62 | 52.53 | 21.82 | 1.71 | 91.80 | 93.80  | 11840.24 | 92104.07 |
| 2007 | 72.70 | 64.13 | 8.57  | 2722.15 | 189.93 | 8.17  | 86.07 | 17.75 | 17.75 | 1.45 | 6.72 | 52.58 | 21.73 | 1.77 | 91.20 | 94.60  | 12884.99 | 92035.96 |
| 2008 | 72.31 | 63.78 | 8.53  | 2821.08 | 264.76 | 8.99  | 80.09 | 64.24 | 19.79 | 1.78 | 7.21 | 52.63 | 21.50 | 1.82 | 90.50 | 95.30  | 12282.14 | 91959.62 |
| 2009 | 72.66 | 64.06 | 8.60  | 2753.64 | 255.28 | 10.19 | 85.62 | 66.55 | 22.27 | 2.27 | 7.92 | 52.72 | 21.28 | 1.87 | 89.90 | 96.10  | 13250.12 | 91883.24 |
| 2010 | 72.78 | 64.14 | 8.64  | 2964.48 | 274.86 | 10.05 | 89.50 | 69.11 | 22.78 | 2.29 | 7.76 | 52.87 | 21.15 | 1.92 | 89.30 | 96.80  | 13108.62 | 91812.30 |
| 2011 | 72.90 | 64.23 | 8.66  | 3220.39 | 323.43 | 9.38  | 79.25 | 64.89 | 18.13 | 1.70 | 7.68 | 53.02 | 21.14 | 1.95 | 88.70 | 97.60  | 14665.80 | 91731.75 |
| 2012 | 73.07 | 64.37 | 8.70  | 3469.67 | 327.69 | 8.57  | 72.67 | 62.41 | 14.12 | 1.21 | 7.36 | 53.16 | 21.22 | 1.98 | 88.10 | 98.30  | 14627.75 | 91655.72 |
| 2013 | 73.22 | 64.48 | 8.74  | 3633.74 | 286.07 | 7.25  | 74.09 | 61.05 | 17.61 | 1.28 | 5.97 | 53.31 | 21.38 | 2.00 | 87.50 | 99.00  | -        | 91579.27 |
| 2014 | 73.42 | 64.63 | 8.79  | 3851.72 | 302.60 | 7.42  | 74.09 | 58.58 | 20.94 | 1.55 | 5.86 | 53.47 | 21.62 | 2.00 | 86.90 | 99.60  | -        | 91521.84 |
| 2015 | 73.64 | 64.79 | 8.85  | 3973.22 | -      | -     | -     | -     | -     | -    | -    | 53.64 | 21.92 | 2.00 | 86.30 | 100.00 | -        | 91482.77 |
| 2016 | 73.92 | 65.01 | 8.90  | 4084.00 | -      | -     | -     | -     | -     | -    | -    | 53.83 | 22.21 | -    | -     | -      | -        | 91467.93 |
| 2017 | 77.17 | 65.53 | 11.64 | -       | -      | -     | -     | -     | -     | -    | -    | -     | -     | -    | -     | -      | -        | -        |

|         |      |       |       |       |          |         |       |       |       |       |      |      |       |       |      |       |        |            |          |
|---------|------|-------|-------|-------|----------|---------|-------|-------|-------|-------|------|------|-------|-------|------|-------|--------|------------|----------|
| Germany | 1995 | 76.64 | 66.70 | 9.94  | 34782.57 | 3128.74 | 9.43  | 53.62 | 9.96  | 81.42 | 7.68 | 1.75 | 73.29 | 22.65 | 1.25 | 99.20 | 100.00 | 1131718.77 | 92014.00 |
|         | 1996 | 76.89 | 66.92 | 9.97  | 34965.69 | 3107.37 | 9.91  | 54.36 | 9.85  | 81.88 | 8.12 | 1.80 | 73.23 | 22.97 | 1.30 | 99.20 | 100.00 | 1153137.92 | 91976.31 |
|         | 1997 | 77.18 | 67.17 | 10.01 | 35560.21 | 2702.66 | 10.03 | 54.74 | 10.63 | 80.58 | 8.09 | 1.95 | 73.17 | 23.22 | 1.35 | 99.20 | 100.00 | 1122917.37 | 91950.40 |
|         | 1998 | 77.45 | 67.41 | 10.05 | 36258.67 | 2728.66 | 10.05 | 55.94 | 11.18 | 80.01 | 8.04 | 2.01 | 73.10 | 23.46 | 1.36 | 99.20 | 100.00 | 1060398.26 | 91924.76 |
|         | 1999 | 77.73 | 67.64 | 10.09 | 36955.29 | 2694.64 | 10.05 | 55.79 | 11.31 | 79.74 | 8.01 | 2.04 | 73.06 | 23.79 | 1.36 | 99.20 | 100.00 | 1020391.26 | 91908.09 |
|         | 2000 | 78.02 | 67.88 | 10.14 | 37998.43 | 2397.75 | 10.10 | 56.79 | 11.83 | 79.17 | 8.00 | 2.10 | 73.07 | 24.28 | 1.38 | 99.20 | 100.00 | 1016295.55 | 91924.02 |
|         | 2001 | 78.30 | 68.10 | 10.20 | 38577.73 | 2407.87 | 10.15 | 56.53 | 11.80 | 79.12 | 8.03 | 2.12 | 73.11 | 24.97 | 1.35 | 99.20 | 100.00 | 1025983.50 | 92009.86 |
|         | 2002 | 78.52 | 68.28 | 10.23 | 38512.92 | 2622.98 | 10.40 | 56.82 | 12.12 | 78.67 | 8.18 | 2.22 | 73.17 | 25.80 | 1.34 | 99.20 | 100.00 | 1007404.93 | 92095.76 |
|         | 2003 | 78.72 | 68.44 | 10.27 | 38218.35 | 3222.75 | 10.62 | 57.05 | 12.50 | 78.09 | 8.29 | 2.33 | 73.23 | 26.69 | 1.34 | 99.20 | 100.00 | 1017485.98 | 92183.55 |
|         | 2004 | 79.02 | 68.68 | 10.34 | 38673.89 | 3542.82 | 10.37 | 58.81 | 13.90 | 76.37 | 7.92 | 2.45 | 73.29 | 27.53 | 1.36 | 99.20 | 100.00 | 1016628.79 | 92274.03 |
|         | 2005 | 79.25 | 68.87 | 10.38 | 38969.32 | 3647.79 | 10.52 | 58.62 | 13.99 | 76.13 | 8.01 | 2.51 | 73.36 | 28.26 | 1.34 | 99.20 | 100.00 | 981287.68  | 92369.17 |
|         | 2006 | 79.49 | 69.06 | 10.42 | 40456.86 | 3766.11 | 10.34 | 58.82 | 14.12 | 75.99 | 7.86 | 2.48 | 73.49 | 29.03 | 1.33 | 99.20 | 100.00 | 994686.05  | 92389.79 |
|         | 2007 | 79.67 | 69.20 | 10.46 | 41831.87 | 4254.23 | 10.18 | 58.46 | 75.95 | 75.95 | 7.73 | 2.45 | 73.70 | 29.69 | 1.37 | 99.20 | 100.00 | 972896.23  | 92407.40 |
|         | 2008 | 79.83 | 69.35 | 10.48 | 42365.10 | 4743.27 | 10.39 | 57.50 | 13.78 | 76.03 | 7.90 | 2.49 | 73.90 | 30.25 | 1.38 | 99.20 | 100.00 | 992116.30  | 92423.67 |

|      |       |       |       |          |         |       |       |       |       |      |      |       |       |      |       |        |           |          |
|------|-------|-------|-------|----------|---------|-------|-------|-------|-------|------|------|-------|-------|------|-------|--------|-----------|----------|
| 2009 | 79.97 | 69.46 | 10.51 | 40086.10 | 4752.82 | 11.40 | 57.41 | 13.56 | 76.38 | 8.71 | 2.69 | 74.09 | 30.74 | 1.36 | 99.20 | 100.00 | 950463.41 | 92441.07 |
| 2010 | 80.14 | 69.60 | 10.54 | 41785.56 | 4700.09 | 11.25 | 57.84 | 13.75 | 76.22 | 8.58 | 2.68 | 74.29 | 31.17 | 1.39 | 99.20 | 100.00 | 948006.75 | 92457.95 |
| 2011 | 80.32 | 69.74 | 10.59 | 44125.33 | 5025.25 | 10.93 | 57.39 | 13.78 | 75.99 | 8.31 | 2.63 | 74.49 | 31.40 | 1.39 | 99.20 | 100.00 | 929540.26 | 92554.11 |
| 2012 | 80.48 | 69.87 | 10.61 | 44259.26 | 4753.88 | 10.99 | 57.80 | 13.83 | 76.07 | 8.36 | 2.63 | 74.69 | 31.56 | 1.41 | 99.20 | 100.00 | 951716.71 | 92642.73 |
| 2013 | 80.57 | 69.95 | 10.63 | 44354.74 | 5098.24 | 11.16 | 56.77 | 13.20 | 76.75 | 8.57 | 2.60 | 74.89 | 31.69 | 1.42 | 99.20 | 100.00 | -         | 92723.44 |
| 2014 | 80.79 | 70.11 | 10.68 | 45022.57 | 5410.63 | 11.30 | 57.35 | 13.20 | 76.99 | 8.70 | 2.60 | 75.09 | 31.86 | 1.47 | 99.20 | 100.00 | -         | 92807.57 |
| 2015 | 80.87 | 70.17 | 10.69 | 45412.56 | -       | -     | -     | -     | -     | -    | -    | 75.30 | 32.11 | 1.50 | 99.20 | 100.00 | -         | 92893.87 |
| 2016 | 80.93 | 70.23 | 10.70 | 45745.79 | -       | -     | -     | -     | -     | -    | -    | 75.51 | 32.40 | -    | -     | -      | -         | 92998.43 |
| 2017 | 80.63 | 69.55 | 11.09 | -        | -       | -     | -     | -     | -     | -    | -    | -     | -     | -    | -     | -      | -         | -        |

|       |      |       |       |      |         |       |      |       |       |       |      |      |       |      |      |       |       |           |          |
|-------|------|-------|-------|------|---------|-------|------|-------|-------|-------|------|------|-------|------|------|-------|-------|-----------|----------|
| Ghana | 1995 | 59.46 | 51.90 | 7.56 | 886.48  | 19.07 | 3.09 | 64.24 | 30.46 | 52.58 | 1.62 | 1.46 | 40.14 | 5.48 | 5.17 | 8.60  | 63.20 | 30510.82  | 87741.10 |
|       | 1996 | 59.48 | 51.96 | 7.52 | 904.34  | 22.29 | 3.45 | 63.88 | 26.45 | 58.60 | 2.02 | 1.43 | 40.90 | 5.49 | 5.10 | 9.00  | 64.70 | 30600.45  | 87771.45 |
|       | 1997 | 59.06 | 51.65 | 7.41 | 919.64  | 18.83 | 3.00 | 64.79 | 33.74 | 47.93 | 1.44 | 1.56 | 41.65 | 5.49 | 5.04 | 9.30  | 66.20 | 31402.41  | 87821.99 |
|       | 1998 | 59.36 | 51.92 | 7.44 | 940.04  | 20.55 | 3.23 | 63.40 | 28.62 | 54.86 | 1.77 | 1.46 | 42.42 | 5.48 | 4.97 | 9.60  | 67.60 | 130472.49 | 87871.18 |
|       | 1999 | 59.30 | 51.89 | 7.40 | 957.97  | 19.87 | 3.08 | 63.15 | 30.49 | 51.72 | 1.59 | 1.49 | 43.18 | 5.46 | 4.90 | 10.00 | 69.10 | 94526.40  | 87908.19 |
|       | 2000 | 59.31 | 51.92 | 7.39 | 969.22  | 12.27 | 3.00 | 63.56 | 31.80 | 49.97 | 1.50 | 1.50 | 43.93 | 5.43 | 4.83 | 10.30 | 70.50 | 107699.83 | 87943.88 |
|       | 2001 | 59.22 | 51.90 | 7.32 | 982.93  | 15.25 | 3.56 | 63.92 | 27.19 | 57.46 | 2.05 | 1.51 | 44.60 | 5.56 | 4.75 | 10.60 | 71.80 | 104386.21 | 87936.03 |
|       | 2002 | 59.31 | 52.00 | 7.31 | 1001.24 | 14.98 | 3.07 | 62.80 | 31.97 | 49.10 | 1.51 | 1.56 | 45.28 | 5.69 | 4.68 | 11.00 | 73.10 | 92865.73  | 87936.23 |
|       | 2003 | 59.53 | 52.19 | 7.34 | 1026.40 | 18.48 | 3.12 | 64.62 | 31.92 | 50.60 | 1.58 | 1.54 | 45.95 | 5.80 | 4.61 | 11.30 | 74.50 | 108030.31 | 87915.34 |
|       | 2004 | 59.84 | 52.44 | 7.40 | 1056.00 | 26.70 | 3.96 | 64.97 | 25.58 | 60.62 | 2.40 | 1.56 | 46.63 | 5.91 | 4.55 | 11.60 | 75.80 | 71082.31  | 87905.90 |
|       | 2005 | 60.13 | 52.70 | 7.43 | 1089.47 | 36.03 | 4.51 | 64.89 | 22.80 | 64.86 | 2.92 | 1.58 | 47.31 | 6.00 | 4.49 | 12.00 | 77.00 | 113159.71 | 87893.76 |
|       | 2006 | 60.46 | 53.00 | 7.45 | 1129.24 | 43.11 | 4.64 | 65.53 | 22.50 | 65.66 | 3.04 | 1.59 | 47.99 | 6.08 | 4.44 | 12.30 | 78.30 | 104044.73 | 87877.09 |
|       | 2007 | 60.79 | 53.28 | 7.51 | 1147.87 | 58.25 | 5.30 | 65.81 | 70.37 | 70.37 | 3.73 | 1.57 | 48.67 | 6.12 | 4.39 | 12.60 | 79.50 | 107333.77 | 87866.33 |
|       | 2008 | 61.27 | 53.70 | 7.57 | 1220.71 | 59.86 | 4.85 | 66.16 | 22.20 | 66.45 | 3.22 | 1.63 | 49.35 | 6.15 | 4.35 | 13.00 | 80.70 | 124072.65 | 87853.45 |
|       | 2009 | 61.72 | 54.08 | 7.64 | 1247.46 | 56.67 | 5.17 | 65.31 | 18.91 | 71.04 | 3.67 | 1.50 | 50.03 | 6.16 | 4.31 | 13.30 | 81.90 | 104912.64 | 87827.04 |
|       | 2010 | 62.16 | 54.48 | 7.68 | 1312.61 | 70.58 | 5.33 | 65.36 | 18.44 | 71.78 | 3.83 | 1.51 | 50.71 | 6.17 | 4.27 | 13.70 | 83.10 | 106432.69 | 87796.14 |
|       | 2011 | 62.91 | 55.14 | 7.77 | 1460.65 | 76.30 | 4.81 | 63.01 | 16.15 | 74.38 | 3.58 | 1.23 | 51.39 | 6.10 | 4.23 | 14.00 | 84.30 | 107126.22 | 87703.18 |
|       | 2012 | 63.71 | 55.85 | 7.85 | 1558.46 | 78.64 | 4.79 | 77.24 | 26.60 | 65.57 | 3.14 | 1.65 | 52.07 | 6.04 | 4.19 | 14.40 | 85.40 | 107784.29 | 87650.62 |
|       | 2013 | 64.34 | 56.42 | 7.92 | 1633.49 | 84.53 | 4.63 | 66.59 | 19.92 | 70.08 | 3.24 | 1.38 | 52.74 | 5.99 | 4.15 | 14.70 | 86.50 | -         | 87617.54 |
|       | 2014 | 64.87 | 56.89 | 7.98 | 1659.78 | 57.89 | 3.56 | 66.85 | 26.84 | 59.85 | 2.13 | 1.43 | 53.39 | 5.93 | 4.10 | 14.80 | 87.60 | -         | 87595.77 |

|           |      |       |       |       |          |         |      |       |       |       |      |      |       |       |      |        |        |           |          |
|-----------|------|-------|-------|-------|----------|---------|------|-------|-------|-------|------|------|-------|-------|------|--------|--------|-----------|----------|
|           | 2015 | 65.43 | 57.37 | 8.05  | 1685.99  | -       | -    | -     | -     | -     | -    | -    | 54.04 | 5.86  | 4.04 | 14.90  | 88.70  | -         | 87608.16 |
|           | 2016 | 66.01 | 57.92 | 8.08  | 1707.66  | -       | -    | -     | -     | -     | -    | -    | 54.68 | 5.85  | -    | -      | -      | -         | 87608.88 |
|           | 2017 | 65.50 | 57.04 | 8.46  | -        | -       | -    | -     | -     | -     | -    | -    | -     | -     | -    | -      | -      | -         | -        |
| Greece    | 1995 | 77.79 | 68.05 | 9.74  | 19909.53 | 1067.87 | 8.27 | 90.59 | 43.45 | 52.04 | 4.30 | 3.96 | 72.12 | 21.65 | 1.28 | 94.00  | 98.20  | 99302.95  | 92257.36 |
|           | 1996 | 77.94 | 68.19 | 9.75  | 20389.32 | 1116.37 | 8.17 | 89.70 | 42.20 | 52.95 | 4.33 | 3.84 | 72.24 | 22.12 | 1.26 | 94.30  | 98.30  | 102354.44 | 92337.20 |
|           | 1997 | 78.10 | 68.34 | 9.76  | 21198.79 | 1067.18 | 8.01 | 89.61 | 42.26 | 52.84 | 4.23 | 3.78 | 72.36 | 22.60 | 1.27 | 94.60  | 98.50  | 106166.94 | 92430.69 |
|           | 1998 | 78.23 | 68.45 | 9.78  | 21902.74 | 1057.22 | 7.91 | 89.16 | 42.74 | 52.06 | 4.12 | 3.79 | 72.48 | 23.09 | 1.24 | 94.90  | 98.60  | 113865.03 | 92523.59 |
|           | 1999 | 78.36 | 68.57 | 9.80  | 22489.32 | 1115.87 | 8.13 | 88.57 | 41.26 | 53.42 | 4.34 | 3.79 | 72.60 | 23.57 | 1.23 | 95.20  | 98.70  | 109857.75 | 92619.39 |
|           | 2000 | 78.62 | 68.77 | 9.85  | 23275.44 | 918.43  | 7.60 | 85.93 | 34.36 | 60.01 | 4.56 | 3.04 | 72.72 | 24.04 | 1.25 | 95.50  | 98.80  | 115225.46 | 92737.31 |
|           | 2001 | 78.89 | 68.99 | 9.90  | 24111.42 | 1055.01 | 8.47 | 82.57 | 32.40 | 60.76 | 5.15 | 3.32 | 72.91 | 24.64 | 1.25 | 95.80  | 98.90  | 114019.90 | 92677.56 |
|           | 2002 | 79.09 | 69.14 | 9.95  | 24965.59 | 1222.75 | 8.72 | 83.36 | 35.02 | 57.99 | 5.06 | 3.66 | 73.30 | 25.23 | 1.28 | 96.20  | 99.10  | 115164.42 | 92622.88 |
|           | 2003 | 79.27 | 69.27 | 9.99  | 26349.28 | 1580.46 | 8.61 | 85.18 | 34.25 | 59.79 | 5.15 | 3.46 | 73.69 | 25.77 | 1.29 | 96.50  | 99.20  | 118731.24 | 92588.74 |
|           | 2004 | 79.44 | 69.39 | 10.05 | 27614.41 | 1809.35 | 8.30 | 86.16 | 35.22 | 59.12 | 4.91 | 3.39 | 74.07 | 26.22 | 1.31 | 96.80  | 99.30  | 118117.94 | 92555.75 |
|           | 2005 | 79.60 | 69.50 | 10.10 | 27698.51 | 2094.78 | 9.36 | 87.31 | 34.83 | 60.11 | 5.63 | 3.73 | 74.45 | 26.56 | 1.34 | 97.10  | 99.40  | 120036.21 | 92534.34 |
|           | 2006 | 79.85 | 69.68 | 10.17 | 29176.39 | 2296.05 | 9.34 | 86.57 | 32.87 | 62.03 | 5.79 | 3.54 | 74.83 | 26.84 | 1.40 | 97.40  | 99.60  | 117313.29 | 92484.72 |
|           | 2007 | 79.93 | 69.73 | 10.19 | 30054.89 | 2689.06 | 9.41 | 87.16 | 60.35 | 60.35 | 5.68 | 3.73 | 75.20 | 26.99 | 1.41 | 97.70  | 99.70  | 127392.26 | 92427.72 |
|           | 2008 | 80.16 | 69.90 | 10.26 | 29874.74 | 3093.58 | 9.76 | 94.53 | 37.86 | 59.94 | 5.85 | 3.91 | 75.57 | 27.08 | 1.50 | 98.00  | 99.80  | 117310.66 | 92372.98 |
|           | 2009 | 80.27 | 69.97 | 10.30 | 28514.81 | 2879.08 | 9.76 | 93.16 | 28.43 | 69.46 | 6.78 | 2.98 | 75.93 | 27.22 | 1.50 | 98.20  | 99.90  | 113365.80 | 92319.50 |
|           | 2010 | 80.39 | 70.05 | 10.35 | 26917.76 | 2458.73 | 9.18 | 90.96 | 29.36 | 67.68 | 6.22 | 2.96 | 76.29 | 27.50 | 1.48 | 98.50  | 100.00 | 107505.98 | 92301.68 |
|           | 2011 | 80.48 | 70.14 | 10.34 | 24495.71 | 2528.39 | 9.77 | 91.32 | 28.71 | 68.39 | 6.68 | 3.07 | 76.65 | 27.94 | 1.40 | 98.80  | 100.00 | 105013.93 | 92397.27 |
|           | 2012 | 80.58 | 70.24 | 10.34 | 22830.53 | 2048.93 | 9.24 | 90.18 | 28.84 | 67.89 | 6.27 | 2.96 | 77.00 | 28.51 | 1.34 | 99.00  | 100.00 | 100571.17 | 92538.51 |
|           | 2013 | 80.82 | 70.44 | 10.37 | 22251.26 | 2017.22 | 9.26 | 90.95 | 30.67 | 65.53 | 6.07 | 3.12 | 77.34 | 29.16 | 1.29 | 99.00  | 100.00 | -         | 92725.01 |
|           | 2014 | 80.93 | 70.55 | 10.38 | 22565.68 | 1743.04 | 8.08 | 90.94 | 34.86 | 61.66 | 4.99 | 3.10 | 77.68 | 29.83 | 1.30 | 99.00  | 100.00 | -         | 92927.55 |
|           | 2015 | 80.96 | 70.60 | 10.36 | 22648.77 | -       | -    | -     | -     | -     | -    | -    | 78.01 | 30.45 | 1.30 | 99.00  | 100.00 | -         | 93133.32 |
|           | 2016 | 80.97 | 70.63 | 10.34 | 22749.31 | -       | -    | -     | -     | -     | -    | -    | 78.33 | 30.84 | -    | -      | -      | -         | 93322.67 |
|           | 2017 | 80.99 | 69.93 | 11.06 | -        | -       | -    | -     | -     | -     | -    | -    | -     | -     | -    | -      | -      | -         | -        |
| Greenland | 1995 | 63.98 | 56.17 | 7.81  | 26899.80 | -       | -    | -     | -     | -     | -    | -    | 80.90 | -     | 2.51 | 100.00 | 100.00 | -         | 86070.61 |
|           | 1996 | 64.09 | 56.28 | 7.81  | 27262.41 | -       | -    | -     | -     | -     | -    | -    | 81.10 | -     | 2.49 | 100.00 | 100.00 | -         | 86171.95 |
|           | 1997 | 64.20 | 56.39 | 7.82  | 27613.48 | -       | -    | -     | -     | -     | -    | -    | 81.23 | -     | 2.69 | 100.00 | 100.00 | -         | 86290.24 |

|      |       |       |       |          |   |   |   |   |   |   |   |   |       |   |      |        |        |   |          |
|------|-------|-------|-------|----------|---|---|---|---|---|---|---|---|-------|---|------|--------|--------|---|----------|
| 1998 | 64.47 | 56.62 | 7.84  | 29702.69 | - | - | - | - | - | - | - | - | 81.35 | - | 2.46 | 100.00 | 100.00 | - | 86429.39 |
| 1999 | 64.70 | 56.81 | 7.88  | 30111.96 | - | - | - | - | - | - | - | - | 81.48 | - | 2.42 | 100.00 | 100.00 | - | 86589.68 |
| 2000 | 65.05 | 57.11 | 7.94  | 32193.00 | - | - | - | - | - | - | - | - | 81.60 | - | 2.33 | 100.00 | 100.00 | - | 86758.58 |
| 2001 | 65.22 | 57.24 | 7.98  | 32514.76 | - | - | - | - | - | - | - | - | 81.85 | - | 2.51 | 100.00 | 100.00 | - | 86877.15 |
| 2002 | 65.46 | 57.44 | 8.02  | 32051.67 | - | - | - | - | - | - | - | - | 82.10 | - | 2.57 | 100.00 | 100.00 | - | 87022.30 |
| 2003 | 65.57 | 57.53 | 8.04  | 31842.24 | - | - | - | - | - | - | - | - | 82.34 | - | 2.37 | 100.00 | 100.00 | - | 87126.45 |
| 2004 | 65.71 | 57.67 | 8.05  | 33899.13 | - | - | - | - | - | - | - | - | 82.58 | - | 2.42 | 100.00 | 100.00 | - | 87310.43 |
| 2005 | 66.05 | 57.97 | 8.08  | 34814.54 | - | - | - | - | - | - | - | - | 82.86 | - | 2.38 | 100.00 | 100.00 | - | 87445.24 |
| 2006 | 66.76 | 58.54 | 8.22  | 37394.62 | - | - | - | - | - | - | - | - | 83.17 | - | 2.26 | 100.00 | 100.00 | - | 87576.48 |
| 2007 | 67.45 | 59.07 | 8.38  | 37763.90 | - | - | - | - | - | - | - | - | 83.48 | - | 2.30 | 100.00 | 100.00 | - | 87683.38 |
| 2008 | 67.86 | 59.41 | 8.46  | 39281.01 | - | - | - | - | - | - | - | - | 83.79 | - | 2.25 | 100.00 | 100.00 | - | 87802.14 |
| 2009 | 68.10 | 59.59 | 8.51  | 39870.42 | - | - | - | - | - | - | - | - | 84.09 | - | 2.36 | 100.00 | 100.00 | - | 87928.17 |
| 2010 | 68.30 | 59.78 | 8.52  | 40532.51 | - | - | - | - | - | - | - | - | 84.38 | - | 2.20 | 100.00 | 100.00 | - | 88014.28 |
| 2011 | 68.95 | 60.26 | 8.69  | 41147.97 | - | - | - | - | - | - | - | - | 84.76 | - | 2.12 | 100.00 | 100.00 | - | 88064.87 |
| 2012 | 69.72 | 60.89 | 8.84  | 41831.88 | - | - | - | - | - | - | - | - | 85.20 | - | 2.02 | 100.00 | 100.00 | - | 88141.05 |
| 2013 | 70.09 | 61.19 | 8.89  | 40827.78 | - | - | - | - | - | - | - | - | 85.63 | - | 2.08 | 100.00 | 100.00 | - | 88227.20 |
| 2014 | 70.19 | 61.30 | 8.88  | 40629.96 | - | - | - | - | - | - | - | - | 86.05 | - | 2.04 | 100.00 | 100.00 | - | 88275.15 |
| 2015 | 70.07 | 61.23 | 8.84  | 41435.63 | - | - | - | - | - | - | - | - | 86.44 | - | 2.00 | 100.00 | 100.00 | - | 88290.41 |
| 2016 | 70.00 | 61.26 | 8.74  | -        | - | - | - | - | - | - | - | - | 86.81 | - | -    | -      | -      | - | 88310.02 |
| 2017 | 73.55 | 63.47 | 10.08 | -        | - | - | - | - | - | - | - | - | -     | - | -    | -      | -      | - | -        |

|         |      |       |       |      |         |        |      |        |       |       |      |      |       |       |      |       |       |        |          |
|---------|------|-------|-------|------|---------|--------|------|--------|-------|-------|------|------|-------|-------|------|-------|-------|--------|----------|
| Grenada | 1995 | 71.48 | 62.63 | 8.85 | 4690.73 | 190.35 | 6.91 | 100.00 | 56.47 | 43.53 | 3.01 | 3.90 | 34.55 | 14.75 | 3.12 | 98.00 | 96.60 | 177.64 | 90927.95 |
|         | 1996 | 71.48 | 62.65 | 8.83 | 4872.62 | 203.25 | 6.95 | 100.00 | 56.61 | 43.39 | 3.02 | 3.94 | 34.81 | 14.64 | 2.99 | 98.00 | 96.60 | 197.29 | 90953.18 |
|         | 1997 | 71.39 | 62.58 | 8.81 | 5100.51 | 218.75 | 7.25 | 100.00 | 56.47 | 43.53 | 3.16 | 4.10 | 35.07 | 14.41 | 2.87 | 98.00 | 96.60 | 208.01 | 90989.22 |
|         | 1998 | 71.31 | 62.52 | 8.79 | 5688.94 | 247.11 | 7.35 | 100.00 | 57.09 | 42.91 | 3.15 | 4.19 | 35.34 | 14.11 | 2.76 | 98.00 | 96.60 | 205.60 | 91035.03 |
|         | 1999 | 71.30 | 62.50 | 8.80 | 6073.99 | 291.28 | 7.78 | 100.00 | 52.37 | 47.63 | 3.71 | 4.08 | 35.60 | 13.82 | 2.67 | 98.00 | 96.60 | 221.83 | 91102.78 |
|         | 2000 | 71.25 | 62.46 | 8.79 | 6359.78 | 339.02 | 6.62 | 100.00 | 47.97 | 52.03 | 3.45 | 3.18 | 35.87 | 13.58 | 2.58 | 98.00 | 96.60 | 474.97 | 91180.92 |
|         | 2001 | 71.15 | 62.38 | 8.77 | 6217.00 | 391.89 | 7.67 | 100.00 | 41.15 | 58.85 | 4.51 | 3.16 | 36.11 | 13.30 | 2.51 | 98.00 | 96.60 | 444.69 | 91266.88 |
|         | 2002 | 71.02 | 62.27 | 8.75 | 6414.89 | 353.18 | 6.67 | 100.00 | 47.19 | 52.81 | 3.52 | 3.15 | 36.06 | 13.04 | 2.46 | 98.00 | 96.60 | 479.73 | 91355.70 |
|         | 2003 | 71.01 | 62.26 | 8.75 | 7003.13 | 340.27 | 5.89 | 100.00 | 48.17 | 51.83 | 3.06 | 2.84 | 36.01 | 12.81 | 2.41 | 98.00 | 96.60 | 473.34 | 91439.33 |

|      |       |       |      |         |        |      |        |       |       |      |      |       |       |      |       |       |        |          |
|------|-------|-------|------|---------|--------|------|--------|-------|-------|------|------|-------|-------|------|-------|-------|--------|----------|
| 2004 | 70.57 | 61.89 | 8.69 | 6938.74 | 305.53 | 5.24 | 100.00 | 48.41 | 51.59 | 2.70 | 2.53 | 35.96 | 12.56 | 2.37 | 98.00 | 96.60 | 501.04 | 91511.16 |
| 2005 | 71.05 | 62.29 | 8.77 | 7837.35 | 371.77 | 5.50 | 96.70  | 45.42 | 53.03 | 2.92 | 2.59 | 35.92 | 12.29 | 2.34 | 98.00 | 96.60 | 562.25 | 91583.09 |
| 2006 | 71.14 | 62.37 | 8.77 | 7501.84 | 405.41 | 5.99 | 96.95  | 45.05 | 53.53 | 3.21 | 2.78 | 35.87 | 12.06 | 2.32 | 98.00 | 96.60 | 628.85 | 91627.31 |
| 2007 | 71.30 | 62.49 | 8.81 | 7936.04 | 430.27 | 5.88 | 97.38  | 49.32 | 49.32 | 2.90 | 2.98 | 35.82 | 11.81 | 2.30 | 98.00 | 96.60 | 625.76 | 91671.57 |
| 2008 | 71.35 | 62.53 | 8.82 | 7984.84 | 457.99 | 5.76 | 97.66  | 52.05 | 46.70 | 2.69 | 3.07 | 35.78 | 11.57 | 2.28 | 98.00 | 96.60 | 643.73 | 91697.36 |
| 2009 | 71.41 | 62.57 | 8.85 | 7430.56 | 461.69 | 6.24 | 97.75  | 49.64 | 49.22 | 3.07 | 3.17 | 35.73 | 11.33 | 2.26 | 98.00 | 96.60 | 645.08 | 91733.86 |
| 2010 | 71.32 | 62.46 | 8.85 | 7365.67 | 471.95 | 6.41 | 96.79  | 49.95 | 48.40 | 3.10 | 3.31 | 35.68 | 11.11 | 2.24 | 98.00 | 96.60 | 682.66 | 91774.58 |
| 2011 | 71.32 | 62.46 | 8.86 | 7393.89 | 470.47 | 6.35 | 96.70  | 50.40 | 47.88 | 3.04 | 3.31 | 35.63 | 11.01 | 2.22 | 98.00 | 96.60 | 705.68 | 91805.05 |
| 2012 | 71.27 | 62.42 | 8.85 | 7280.34 | 482.12 | 6.36 | 96.66  | 50.34 | 47.92 | 3.05 | 3.31 | 35.60 | 10.91 | 2.19 | 98.00 | 96.60 | 726.19 | 91847.70 |
| 2013 | 71.28 | 62.43 | 8.85 | 7421.48 | 485.42 | 6.15 | 94.96  | 52.01 | 45.23 | 2.78 | 3.37 | 35.58 | 10.83 | 2.17 | 98.00 | 96.60 | -      | 91876.13 |
| 2014 | 71.29 | 62.44 | 8.85 | 7932.67 | 505.83 | 6.10 | 94.96  | 50.93 | 46.37 | 2.83 | 3.27 | 35.58 | 10.79 | 2.15 | 98.00 | 96.60 | -      | 91916.59 |
| 2015 | 71.33 | 62.48 | 8.85 | 8406.77 | -      | -    | -      | -     | -     | -    | -    | 35.59 | 10.78 | 2.13 | 98.00 | 96.60 | -      | 91965.88 |
| 2016 | 71.56 | 62.69 | 8.87 | 8676.34 | -      | -    | -      | -     | -     | -    | -    | 35.62 | 10.88 | -    | -     | -     | -      | 92010.18 |
| 2017 | 74.11 | 65.24 | 8.87 | -       | -      | -    | -      | -     | -     | -    | -    | -     | -     | -    | -     | -     | -      | -        |

|      |      |       |       |      |          |   |   |   |   |   |   |       |       |      |       |       |       |          |
|------|------|-------|-------|------|----------|---|---|---|---|---|---|-------|-------|------|-------|-------|-------|----------|
| Guam | 1995 | 73.33 | 64.50 | 8.83 | -        | - | - | - | - | - | - | 92.06 | 7.22  | 2.87 | 88.90 | 99.60 | 67.20 | 85061.19 |
|      | 1996 | 73.49 | 64.61 | 8.88 | -        | - | - | - | - | - | - | 92.29 | 7.47  | 2.87 | 88.90 | 99.60 | 68.49 | 85116.59 |
|      | 1997 | 69.67 | 61.46 | 8.21 | -        | - | - | - | - | - | - | 92.51 | 7.69  | 2.87 | 89.00 | 99.60 | 69.80 | 85192.43 |
|      | 1998 | 73.69 | 64.74 | 8.95 | -        | - | - | - | - | - | - | 92.73 | 7.90  | 2.86 | 89.10 | 99.60 | 66.97 | 85293.63 |
|      | 1999 | 73.79 | 64.80 | 8.99 | -        | - | - | - | - | - | - | 92.95 | 8.11  | 2.85 | 89.10 | 99.60 | 68.24 | 85378.50 |
|      | 2000 | 73.89 | 64.86 | 9.03 | -        | - | - | - | - | - | - | 93.13 | 8.34  | 2.82 | 89.20 | 99.60 | 69.55 | 85488.68 |
|      | 2001 | 73.93 | 64.86 | 9.06 | -        | - | - | - | - | - | - | 93.23 | 8.71  | 2.79 | 89.20 | 99.60 | 70.86 | 85584.43 |
|      | 2002 | 73.93 | 64.85 | 9.08 | 27723.64 | - | - | - | - | - | - | 93.33 | 9.08  | 2.76 | 89.30 | 99.60 | 72.25 | 85682.53 |
|      | 2003 | 73.84 | 64.75 | 9.08 | 27883.24 | - | - | - | - | - | - | 93.44 | 9.44  | 2.72 | 89.30 | 99.60 | 73.51 | 85796.38 |
|      | 2004 | 73.64 | 64.58 | 9.06 | 29604.15 | - | - | - | - | - | - | 93.53 | 9.75  | 2.68 | 89.40 | 99.60 | 74.84 | 85901.44 |
|      | 2005 | 73.47 | 64.43 | 9.03 | 30592.16 | - | - | - | - | - | - | 93.63 | 10.00 | 2.64 | 89.40 | 99.60 | 76.08 | 86031.69 |
|      | 2006 | 73.20 | 64.22 | 8.99 | 29375.28 | - | - | - | - | - | - | 93.73 | 10.25 | 2.60 | 89.50 | 99.60 | 77.38 | 86149.96 |
|      | 2007 | 72.83 | 63.90 | 8.94 | 29576.90 | - | - | - | - | - | - | 93.82 | 10.43 | 2.56 | 89.60 | 99.60 | 78.75 | 86271.86 |
|      | 2008 | 72.54 | 63.65 | 8.89 | 30054.20 | - | - | - | - | - | - | 93.92 | 10.61 | 2.53 | 89.60 | 99.50 | 80.21 | 86405.87 |
|      | 2009 | 72.31 | 63.46 | 8.86 | 30111.68 | - | - | - | - | - | - | 94.01 | 10.84 | 2.50 | 89.70 | 99.50 | 81.48 | 86534.47 |

|      |       |       |      |          |   |   |   |   |   |   |   |   |       |       |      |       |       |       |          |
|------|-------|-------|------|----------|---|---|---|---|---|---|---|---|-------|-------|------|-------|-------|-------|----------|
| 2010 | 72.14 | 63.29 | 8.85 | 30700.43 | - | - | - | - | - | - | - | - | 94.10 | 11.14 | 2.47 | 89.70 | 99.50 | 83.62 | 86675.40 |
| 2011 | 72.13 | 63.27 | 8.86 | 30693.13 | - | - | - | - | - | - | - | - | 94.19 | 11.54 | 2.45 | 89.80 | 99.50 | 84.77 | 86832.68 |
| 2012 | 72.06 | 63.19 | 8.87 | 31257.16 | - | - | - | - | - | - | - | - | 94.27 | 12.01 | 2.43 | 89.80 | 99.50 | 85.87 | 86983.83 |
| 2013 | 72.05 | 63.16 | 8.89 | 31754.11 | - | - | - | - | - | - | - | - | 94.36 | 12.52 | 2.41 | 89.80 | 99.50 | -     | 87137.05 |
| 2014 | 72.10 | 63.18 | 8.92 | 32129.52 | - | - | - | - | - | - | - | - | 94.44 | 13.05 | 2.39 | 89.80 | 99.50 | -     | 87300.18 |
| 2015 | 72.15 | 63.19 | 8.96 | 32119.65 | - | - | - | - | - | - | - | - | 94.52 | 13.56 | 2.37 | 89.80 | 99.50 | -     | 87448.13 |
| 2016 | 72.34 | 63.31 | 9.03 | 32013.77 | - | - | - | - | - | - | - | - | 94.59 | 14.05 | -    | -     | -     | -     | 87593.56 |
| 2017 | 73.09 | 63.63 | 9.46 | -        | - | - | - | - | - | - | - | - | -     | -     | -    | -     | -     | -     | -        |

|           |      |       |       |      |         |        |      |       |       |       |      |      |       |      |      |       |       |          |          |
|-----------|------|-------|-------|------|---------|--------|------|-------|-------|-------|------|------|-------|------|------|-------|-------|----------|----------|
| Guatemala | 1995 | 66.60 | 58.46 | 8.15 | 2355.89 | 55.46  | 3.92 | 92.42 | 55.43 | 40.02 | 1.57 | 2.35 | 43.11 | 7.18 | 5.09 | 50.90 | 80.30 | 19535.94 | 85790.17 |
|           | 1996 | 67.20 | 58.92 | 8.28 | 2371.31 | 57.34  | 3.86 | 92.36 | 57.05 | 38.23 | 1.47 | 2.38 | 43.51 | 7.30 | 4.99 | 51.70 | 81.00 | 19900.95 | 85759.55 |
|           | 1997 | 67.57 | 59.24 | 8.33 | 2420.03 | 65.83  | 4.02 | 92.25 | 54.37 | 41.06 | 1.65 | 2.37 | 43.91 | 7.41 | 4.90 | 52.40 | 81.70 | 19295.85 | 85753.02 |
|           | 1998 | 67.80 | 59.42 | 8.38 | 2484.76 | 67.23  | 3.86 | 92.42 | 52.01 | 43.72 | 1.69 | 2.17 | 44.32 | 7.49 | 4.80 | 53.10 | 82.40 | 87558.71 | 85750.48 |
|           | 1999 | 68.26 | 59.80 | 8.47 | 2522.86 | 68.83  | 4.29 | 84.96 | 48.84 | 42.51 | 1.82 | 2.46 | 44.72 | 7.56 | 4.70 | 53.80 | 83.10 | 23117.74 | 85746.62 |
|           | 2000 | 68.64 | 60.10 | 8.54 | 2554.78 | 86.67  | 5.25 | 89.41 | 56.96 | 36.30 | 1.91 | 3.35 | 45.13 | 7.62 | 4.60 | 54.60 | 83.90 | 70005.69 | 85771.18 |
|           | 2001 | 68.94 | 60.41 | 8.54 | 2554.26 | 105.54 | 6.76 | 86.84 | 59.02 | 32.04 | 2.17 | 4.59 | 45.53 | 7.68 | 4.49 | 55.30 | 84.60 | 21772.12 | 85795.42 |
|           | 2002 | 69.31 | 60.69 | 8.62 | 2591.33 | 113.54 | 6.71 | 86.04 | 58.75 | 31.71 | 2.13 | 4.58 | 45.94 | 7.72 | 4.37 | 56.00 | 85.20 | 31424.57 | 85817.64 |
|           | 2003 | 69.58 | 60.91 | 8.67 | 2594.93 | 120.00 | 6.88 | 86.18 | 58.00 | 32.70 | 2.25 | 4.63 | 46.34 | 7.75 | 4.25 | 56.70 | 85.90 | 55215.32 | 85874.97 |
|           | 2004 | 69.73 | 61.04 | 8.68 | 2614.71 | 126.05 | 6.77 | 85.50 | 57.87 | 32.31 | 2.19 | 4.58 | 46.76 | 7.77 | 4.11 | 57.40 | 86.60 | 24367.66 | 85940.58 |
|           | 2005 | 69.82 | 61.14 | 8.69 | 2638.29 | 140.14 | 6.79 | 85.80 | 58.61 | 31.70 | 2.15 | 4.64 | 47.17 | 7.77 | 3.97 | 58.10 | 87.30 | 41739.13 | 86023.00 |
|           | 2006 | 70.19 | 61.48 | 8.71 | 2717.76 | 158.48 | 7.07 | 86.57 | 57.32 | 33.79 | 2.39 | 4.68 | 47.59 | 7.75 | 3.83 | 58.80 | 88.00 | 27001.20 | 86088.16 |
|           | 2007 | 70.55 | 61.77 | 8.77 | 2825.14 | 169.51 | 6.86 | 85.41 | 33.08 | 33.08 | 2.27 | 4.59 | 48.02 | 7.72 | 3.70 | 59.50 | 88.70 | 34084.60 | 86153.77 |
|           | 2008 | 70.84 | 62.04 | 8.80 | 2854.07 | 184.46 | 6.65 | 85.32 | 55.55 | 34.89 | 2.32 | 4.33 | 48.45 | 7.69 | 3.58 | 60.20 | 89.40 | 32857.91 | 86255.95 |
|           | 2009 | 71.08 | 62.26 | 8.82 | 2806.98 | 177.64 | 6.79 | 85.05 | 53.51 | 37.08 | 2.52 | 4.27 | 48.88 | 7.65 | 3.47 | 60.90 | 90.00 | 37118.66 | 86363.91 |
|           | 2010 | 71.29 | 62.50 | 8.80 | 2825.52 | 186.27 | 6.64 | 85.04 | 54.61 | 35.78 | 2.38 | 4.26 | 49.32 | 7.61 | 3.38 | 61.60 | 90.70 | 30327.55 | 86467.02 |
|           | 2011 | 71.55 | 62.71 | 8.85 | 2880.41 | 198.98 | 6.28 | 84.62 | 55.62 | 34.26 | 2.15 | 4.13 | 49.77 | 7.59 | 3.29 | 62.20 | 91.40 | 30950.25 | 86534.05 |
|           | 2012 | 71.87 | 63.00 | 8.88 | 2903.40 | 207.52 | 6.33 | 83.89 | 55.42 | 33.93 | 2.15 | 4.18 | 50.21 | 7.56 | 3.22 | 62.90 | 92.00 | 31515.45 | 86608.94 |
|           | 2013 | 72.15 | 63.24 | 8.91 | 2947.97 | 216.09 | 6.30 | 83.32 | 52.60 | 36.88 | 2.32 | 3.97 | 50.66 | 7.54 | 3.15 | 63.60 | 92.70 | -        | 86683.92 |
|           | 2014 | 72.37 | 63.45 | 8.92 | 3007.90 | 232.63 | 6.20 | 83.74 | 52.22 | 37.64 | 2.33 | 3.87 | 51.12 | 7.56 | 3.09 | 63.70 | 92.70 | -        | 86756.08 |
|           | 2015 | 72.59 | 63.66 | 8.93 | 3069.04 | -      | -    | -     | -     | -     | -    | -    | 51.57 | 7.61 | 3.03 | 63.90 | 92.80 | -        | 86814.37 |

|        |      |       |       |      |         |       |      |       |       |       |      |      |       |       |      |       |       |           |          |          |
|--------|------|-------|-------|------|---------|-------|------|-------|-------|-------|------|------|-------|-------|------|-------|-------|-----------|----------|----------|
|        | 2016 | 72.75 | 63.86 | 8.89 | 3100.21 | -     | -    | -     | -     | -     | -    | -    | -     | 52.03 | 7.68 | -     | -     | -         | -        | 86855.64 |
|        | 2017 | 72.63 | 63.67 | 8.96 | -       | -     | -    | -     | -     | -     | -    | -    | -     | -     | -    | -     | -     | -         | -        | -        |
| Guinea | 1995 | 53.34 | 46.22 | 7.13 | 529.37  | 16.59 | 3.53 | 87.94 | 56.95 | 35.24 | 1.24 | 2.29 | 29.48 | 6.74  | 6.39 | 10.60 | 57.60 | 62537.28  | 89929.42 |          |
|        | 1996 | 53.83 | 46.67 | 7.16 | 535.22  | 14.90 | 3.13 | 87.96 | 66.34 | 24.58 | 0.77 | 2.36 | 29.77 | 6.74  | 6.33 | 11.00 | 58.60 | 61747.24  | 89875.93 |          |
|        | 1997 | 54.12 | 46.94 | 7.18 | 549.08  | 13.87 | 3.05 | 87.94 | 66.23 | 24.70 | 0.75 | 2.30 | 30.07 | 6.72  | 6.27 | 11.50 | 59.60 | 62164.74  | 89824.18 |          |
|        | 1998 | 54.22 | 47.06 | 7.15 | 558.03  | 14.33 | 3.39 | 87.95 | 63.36 | 27.96 | 0.95 | 2.44 | 30.37 | 6.67  | 6.21 | 11.90 | 60.70 | 116336.80 | 89802.70 |          |
|        | 1999 | 54.30 | 47.17 | 7.14 | 569.23  | 13.67 | 3.42 | 87.94 | 61.32 | 30.27 | 1.03 | 2.38 | 30.69 | 6.60  | 6.15 | 12.40 | 61.70 | 89859.98  | 89768.78 |          |
|        | 2000 | 54.66 | 47.49 | 7.18 | 573.22  | 11.77 | 3.46 | 87.94 | 60.06 | 31.71 | 1.10 | 2.36 | 31.02 | 6.52  | 6.08 | 12.90 | 62.70 | 84360.14  | 89763.55 |          |
|        | 2001 | 54.82 | 47.70 | 7.12 | 583.42  | 11.54 | 3.65 | 87.94 | 57.36 | 34.77 | 1.27 | 2.38 | 31.36 | 6.48  | 6.02 | 13.40 | 63.70 | 80294.73  | 89744.99 |          |
|        | 2002 | 55.10 | 47.96 | 7.14 | 602.40  | 12.18 | 3.76 | 87.93 | 57.24 | 34.90 | 1.31 | 2.45 | 31.70 | 6.42  | 5.95 | 13.80 | 64.80 | 102233.51 | 89738.95 |          |
|        | 2003 | 55.50 | 48.31 | 7.19 | 598.62  | 12.80 | 3.45 | 87.90 | 54.40 | 38.11 | 1.31 | 2.13 | 32.06 | 6.33  | 5.88 | 14.30 | 65.80 | 75067.41  | 89742.96 |          |
|        | 2004 | 55.81 | 48.58 | 7.23 | 600.98  | 12.05 | 3.14 | 87.91 | 63.26 | 28.04 | 0.88 | 2.26 | 32.43 | 6.22  | 5.80 | 14.80 | 66.80 | 76276.00  | 89758.88 |          |
|        | 2005 | 56.17 | 48.89 | 7.28 | 606.87  | 8.57  | 2.82 | 87.91 | 70.62 | 19.67 | 0.55 | 2.27 | 32.81 | 6.09  | 5.73 | 15.30 | 67.80 | 81922.61  | 89768.65 |          |
|        | 2006 | 56.41 | 49.14 | 7.27 | 609.33  | 8.95  | 3.02 | 87.92 | 68.55 | 22.03 | 0.67 | 2.35 | 33.20 | 6.08  | 5.65 | 15.80 | 68.80 | 101496.41 | 89770.20 |          |
|        | 2007 | 56.70 | 49.40 | 7.30 | 635.17  | 12.53 | 3.08 | 87.95 | 13.59 | 13.59 | 0.42 | 2.66 | 33.60 | 6.06  | 5.58 | 16.30 | 69.80 | 91126.98  | 89777.00 |          |
|        | 2008 | 57.16 | 49.80 | 7.36 | 646.97  | 13.89 | 3.21 | 87.93 | 66.42 | 24.47 | 0.78 | 2.42 | 34.01 | 6.01  | 5.50 | 16.80 | 70.80 | 135227.87 | 89805.81 |          |
|        | 2009 | 57.52 | 50.11 | 7.40 | 622.94  | 16.56 | 3.85 | 87.94 | 57.17 | 34.99 | 1.35 | 2.50 | 34.43 | 5.94  | 5.42 | 17.30 | 71.80 | 160212.12 | 89821.44 |          |
|        | 2010 | 57.98 | 50.52 | 7.46 | 635.67  | 19.56 | 4.55 | 87.94 | 49.03 | 44.24 | 2.01 | 2.54 | 34.86 | 5.85  | 5.34 | 17.90 | 72.80 | 100274.04 | 89846.41 |          |
|        | 2011 | 58.48 | 50.96 | 7.53 | 655.92  | 21.18 | 4.73 | 87.96 | 51.20 | 41.79 | 1.98 | 2.75 | 35.30 | 5.82  | 5.26 | 18.40 | 73.80 | 100814.39 | 89830.26 |          |
|        | 2012 | 58.92 | 51.35 | 7.57 | 679.56  | 26.27 | 5.39 | 88.00 | 53.74 | 38.93 | 2.10 | 3.29 | 35.75 | 5.77  | 5.18 | 18.90 | 74.80 | 101348.99 | 89829.11 |          |
|        | 2013 | 59.38 | 51.76 | 7.62 | 690.67  | 28.65 | 5.49 | 87.99 | 49.89 | 43.29 | 2.38 | 3.11 | 36.21 | 5.70  | 5.09 | 19.40 | 75.70 | -         | 89826.72 |          |
|        | 2014 | 59.14 | 51.59 | 7.55 | 699.96  | 30.46 | 5.64 | 87.97 | 45.33 | 48.47 | 2.74 | 2.91 | 36.68 | 5.65  | 5.01 | 20.00 | 76.70 | -         | 89834.78 |          |
|        | 2015 | 60.02 | 52.34 | 7.68 | 707.37  | -     | -    | -     | -     | -     | -    | -    | 37.16 | 5.63  | 4.93 | 20.10 | 76.80 | -         | 89846.77 |          |
|        | 2016 | 60.68 | 52.92 | 7.76 | 735.72  | -     | -    | -     | -     | -     | -    | -    | 37.65 | 5.68  | -    | -     | -     | -         | 89862.19 |          |
|        | 2017 | 60.72 | 52.77 | 7.95 | -       | -     | -    | -     | -     | -     | -    | -    | -     | -     | -    | -     | -     | -         | -        |          |
| Guyana | 1995 | 64.95 | 56.77 | 8.17 | 2036.70 | 43.34 | 5.07 | 87.51 | 16.28 | 81.40 | 4.12 | 0.94 | 29.14 | 6.45  | 3.07 | 77.30 | 82.30 | 16107.04  | 90965.05 |          |
|        | 1996 | 64.83 | 56.70 | 8.13 | 2195.62 | 47.79 | 4.95 | 87.94 | 16.07 | 81.73 | 4.04 | 0.90 | 29.05 | 6.53  | 3.07 | 77.70 | 83.10 | 16425.01  | 90947.61 |          |
|        | 1997 | 64.96 | 56.79 | 8.18 | 2336.48 | 52.52 | 5.15 | 87.08 | 14.86 | 82.94 | 4.27 | 0.88 | 28.96 | 6.59  | 3.06 | 78.10 | 83.90 | 16419.27  | 90933.56 |          |
|        | 1998 | 65.13 | 56.89 | 8.23 | 2304.31 | 51.29 | 5.27 | 87.31 | 15.85 | 81.85 | 4.31 | 0.96 | 28.87 | 6.65  | 3.05 | 78.50 | 84.70 | 12863.53  | 90921.22 |          |

|       |       |       |       |         |        |       |       |       |       |       |      |       |       |      |       |       |          |          |          |
|-------|-------|-------|-------|---------|--------|-------|-------|-------|-------|-------|------|-------|-------|------|-------|-------|----------|----------|----------|
| 1999  | 65.36 | 57.05 | 8.31  | 2381.15 | 43.93  | 4.68  | 86.08 | 15.90 | 81.53 | 3.82  | 0.86 | 28.78 | 6.69  | 3.04 | 78.90 | 85.50 | 4579.59  | 90908.60 |          |
| 2000  | 65.43 | 57.07 | 8.36  | 2354.53 | 56.15  | 5.85  | 86.08 | 13.14 | 84.74 | 4.95  | 0.89 | 28.69 | 6.74  | 3.02 | 79.20 | 86.20 | 4405.23  | 90899.00 |          |
| 2001  | 65.33 | 57.01 | 8.32  | 2410.83 | 54.57  | 5.82  | 86.08 | 13.70 | 84.09 | 4.90  | 0.93 | 28.61 | 6.82  | 2.99 | 79.60 | 87.00 | 4876.15  | 91010.03 |          |
| 2002  | 65.15 | 56.88 | 8.26  | 2437.40 | 56.73  | 5.84  | 86.08 | 13.11 | 84.77 | 4.95  | 0.89 | 28.52 | 6.91  | 2.96 | 80.00 | 87.80 | 5086.47  | 91120.90 |          |
| 2003  | 64.90 | 56.69 | 8.20  | 2412.98 | 59.63  | 5.97  | 90.61 | 18.50 | 79.58 | 4.75  | 1.22 | 28.43 | 6.99  | 2.92 | 80.40 | 88.60 | 5790.98  | 91239.06 |          |
| 2004  | 64.70 | 56.55 | 8.16  | 2493.14 | 60.66  | 5.73  | 90.61 | 18.67 | 79.40 | 4.55  | 1.18 | 28.36 | 7.02  | 2.88 | 80.80 | 89.40 | 4964.89  | 91355.22 |          |
| 2005  | 64.65 | 56.49 | 8.16  | 2446.65 | 64.74  | 5.83  | 90.61 | 22.82 | 74.81 | 4.36  | 1.47 | 28.30 | 6.97  | 2.84 | 81.20 | 90.20 | 4917.33  | 91478.88 |          |
| 2006  | 64.90 | 56.72 | 8.18  | 2576.78 | 91.57  | 4.67  | 90.61 | 31.52 | 65.21 | 3.04  | 1.62 | 28.26 | 7.05  | 2.80 | 81.60 | 91.00 | 4648.22  | 91580.41 |          |
| 2007  | 65.01 | 56.82 | 8.19  | 2764.06 | 150.63 | 6.45  | 90.61 | 72.61 | 72.61 | 4.69  | 1.77 | 28.23 | 7.08  | 2.76 | 82.00 | 91.80 | 4939.33  | 91690.33 |          |
| 2008  | 65.05 | 56.87 | 8.18  | 2824.57 | 191.83 | 7.46  | 90.61 | 22.66 | 74.99 | 5.60  | 1.87 | 28.22 | 7.10  | 2.72 | 82.40 | 92.60 | 5112.84  | 91797.86 |          |
| 2009  | 65.30 | 57.07 | 8.23  | 2927.33 | 197.50 | 7.32  | 92.34 | 25.47 | 72.41 | 5.30  | 2.02 | 28.22 | 7.14  | 2.68 | 82.80 | 93.40 | 25763.69 | 91904.74 |          |
| 2010  | 65.36 | 57.13 | 8.24  | 3044.95 | 198.02 | 6.60  | 92.34 | 29.96 | 67.55 | 4.46  | 2.14 | 28.24 | 7.26  | 2.66 | 83.20 | 94.20 | 5937.29  | 92016.07 |          |
| 2011  | 65.58 | 57.32 | 8.26  | 3192.30 | 231.69 | 6.80  | 92.34 | 30.24 | 67.26 | 4.57  | 2.23 | 28.27 | 7.29  | 2.63 | 83.60 | 95.10 | 6042.58  | 92092.93 |          |
| 2012  | 65.83 | 57.55 | 8.28  | 3342.92 | 246.81 | 6.57  | 92.34 | 31.31 | 66.10 | 4.34  | 2.23 | 28.32 | 7.37  | 2.61 | 83.60 | 95.90 | 6140.69  | 92148.41 |          |
| 2013  | 66.21 | 57.88 | 8.33  | 3487.55 | 200.22 | 5.10  | 92.32 | 39.85 | 56.83 | 2.90  | 2.20 | 28.38 | 7.49  | 2.58 | 83.60 | 96.70 | -        | 92203.63 |          |
| 2014  | 66.57 | 58.18 | 8.38  | 3598.29 | 221.78 | 5.25  | 92.32 | 37.44 | 59.45 | 3.12  | 2.13 | 28.46 | 7.61  | 2.56 | 83.60 | 97.50 | -        | 92260.08 |          |
| 2015  | 66.86 | 58.44 | 8.43  | 3683.50 | -      | -     | -     | -     | -     | -     | -    | 28.55 | 7.73  | 2.53 | 83.70 | 98.30 | -        | 92291.20 |          |
| 2016  | 67.74 | 59.17 | 8.57  | 3783.54 | -      | -     | -     | -     | -     | -     | -    | 28.66 | 7.90  | -    | -     | -     | -        | 92304.19 |          |
| 2017  | 69.21 | 60.44 | 8.77  | -       | -      | -     | -     | -     | -     | -     | -    | -     | -     | -    | -     | -     | -        | -        |          |
| Haiti | 1995  | 55.07 | 48.04 | 7.04    | -      | 22.77 | 6.60  | 77.04 | 45.54 | 40.89 | 2.70 | 3.90  | 32.59 | 7.47 | 4.89  | 19.20 | 62.20    | 5951.29  | 91400.73 |
|       | 1996  | 55.42 | 48.35 | 7.07    | 757.06 | 24.04 | 6.45  | 83.29 | 51.55 | 38.11 | 2.46 | 3.99  | 33.20 | 7.46 | 4.78  | 19.60 | 61.90    | 6270.29  | 91401.53 |
|       | 1997  | 55.66 | 48.55 | 7.10    | 763.50 | 24.79 | 6.20  | 86.25 | 52.25 | 39.41 | 2.44 | 3.76  | 33.79 | 7.44 | 4.67  | 20.00 | 61.70    | 6632.31  | 91387.33 |
|       | 1998  | 56.01 | 48.85 | 7.16    | 766.32 | 27.26 | 5.99  | 73.55 | 48.61 | 33.91 | 2.03 | 3.96  | 34.39 | 7.41 | 4.55  | 20.30 | 61.40    | 6749.95  | 91396.12 |
|       | 1999  | 56.33 | 49.12 | 7.21    | 773.42 | 27.50 | 5.65  | 72.84 | 50.97 | 30.02 | 1.70 | 3.96  | 34.99 | 7.37 | 4.43  | 20.70 | 61.10    | 7000.62  | 91400.96 |
|       | 2000  | 56.75 | 49.47 | 7.28    | 766.94 | 25.97 | 6.06  | 69.71 | 50.38 | 27.72 | 1.68 | 4.38  | 35.60 | 7.33 | 4.30  | 21.00 | 60.80    | 7179.10  | 91402.92 |
|       | 2001  | 57.08 | 49.78 | 7.30    | 746.41 | 22.73 | 5.63  | 71.77 | 53.00 | 26.15 | 1.47 | 4.16  | 37.25 | 7.35 | 4.18  | 21.60 | 60.80    | 7498.51  | 91400.76 |
|       | 2002  | 57.41 | 50.07 | 7.34    | 732.55 | 19.89 | 5.47  | 71.15 | 52.78 | 25.81 | 1.41 | 4.06  | 38.94 | 7.36 | 4.07  | 22.10 | 60.80    | 7616.28  | 91397.87 |
|       | 2003  | 57.56 | 50.22 | 7.34    | 723.60 | 16.74 | 5.32  | 74.27 | 52.12 | 29.82 | 1.59 | 3.73  | 40.65 | 7.36 | 3.96  | 22.60 | 60.80    | 7598.89  | 91403.25 |
|       | 2004  | 56.56 | 49.39 | 7.17    | 687.19 | 22.52 | 5.61  | 75.94 | 48.48 | 36.16 | 2.03 | 3.58  | 42.38 | 7.35 | 3.85  | 23.20 | 60.70    | 7871.31  | 91405.73 |

|      |       |       |      |        |       |       |       |       |       |      |      |       |      |      |       |       |         |          |
|------|-------|-------|------|--------|-------|-------|-------|-------|-------|------|------|-------|------|------|-------|-------|---------|----------|
| 2005 | 57.97 | 50.59 | 7.38 | 688.70 | 19.77 | 4.41  | 73.08 | 57.52 | 21.29 | 0.94 | 3.47 | 44.08 | 7.34 | 3.76 | 23.70 | 60.60 | 8059.94 | 91422.02 |
| 2006 | 58.29 | 50.91 | 7.38 | 693.26 | 29.56 | 5.70  | 54.52 | 41.55 | 23.78 | 1.36 | 4.34 | 45.76 | 7.39 | 3.67 | 24.20 | 60.40 | 8169.69 | 91420.48 |
| 2007 | 58.81 | 51.36 | 7.45 | 705.39 | 34.72 | 5.56  | 55.97 | 23.87 | 23.87 | 1.33 | 4.23 | 47.39 | 7.44 | 3.58 | 24.60 | 60.20 | 8537.21 | 91427.16 |
| 2008 | 59.25 | 51.73 | 7.52 | 700.48 | 39.10 | 5.92  | 50.82 | 39.19 | 22.90 | 1.36 | 4.57 | 48.98 | 7.48 | 3.49 | 25.10 | 59.90 | 8462.39 | 91444.81 |
| 2009 | 59.99 | 52.35 | 7.64 | 711.25 | 44.07 | 6.68  | 45.66 | 36.28 | 20.55 | 1.37 | 5.31 | 50.52 | 7.49 | 3.41 | 25.50 | 59.60 | 8453.15 | 91470.28 |
| 2010 | 31.65 | 29.50 | 2.15 | 662.28 | 54.30 | 8.09  | 40.59 | 33.52 | 17.43 | 1.41 | 6.68 | 52.02 | 7.47 | 3.33 | 25.90 | 59.30 | 8545.17 | 91525.96 |
| 2011 | 60.49 | 52.82 | 7.67 | 688.84 | 76.73 | 10.41 | 31.00 | 25.63 | 17.34 | 1.81 | 8.61 | 53.46 | 7.49 | 3.25 | 26.30 | 58.90 | 8695.43 | 91553.62 |
| 2012 | 61.58 | 53.79 | 7.79 | 698.79 | 75.12 | 9.88  | 30.88 | 27.82 | 9.92  | 0.98 | 8.90 | 54.84 | 7.48 | 3.17 | 26.70 | 58.50 | 8835.47 | 91582.86 |
| 2013 | 62.46 | 54.57 | 7.89 | 718.42 | 65.15 | 8.10  | 41.13 | 32.37 | 21.28 | 1.72 | 6.38 | 56.17 | 7.47 | 3.10 | 27.10 | 58.00 | -       | 91604.26 |
| 2014 | 63.26 | 55.26 | 8.00 | 728.78 | 61.46 | 7.56  | 43.87 | 34.82 | 20.64 | 1.56 | 6.00 | 57.44 | 7.47 | 3.03 | 27.40 | 57.50 | -       | 91624.40 |
| 2015 | 63.84 | 55.76 | 8.08 | 728.06 | -     | -     | -     | -     | -     | -    | -    | 58.65 | 7.51 | 2.97 | 27.60 | 57.70 | -       | 91652.35 |
| 2016 | 63.97 | 55.90 | 8.07 | 729.27 | -     | -     | -     | -     | -     | -    | -    | 59.79 | 7.60 | -    | -     | -     | -       | 91667.94 |
| 2017 | 64.95 | 56.26 | 8.68 | -      | -     | -     | -     | -     | -     | -    | -    | -     | -    | -    | -     | -     | -       | -        |

|          |      |       |       |      |         |        |      |       |       |       |      |      |       |      |      |       |       |          |          |
|----------|------|-------|-------|------|---------|--------|------|-------|-------|-------|------|------|-------|------|------|-------|-------|----------|----------|
| Honduras | 1995 | 68.50 | 60.66 | 7.84 | 1594.36 | 37.81  | 5.34 | 89.53 | 41.45 | 53.70 | 2.87 | 2.47 | 42.94 | 6.74 | 4.64 | 55.90 | 77.00 | 16822.76 | 86599.79 |
|          | 1996 | 68.77 | 60.90 | 7.87 | 1606.98 | 35.37  | 4.96 | 89.55 | 45.14 | 49.59 | 2.46 | 2.50 | 43.44 | 6.77 | 4.53 | 57.40 | 77.80 | 17186.99 | 86677.27 |
|          | 1997 | 68.99 | 61.10 | 7.89 | 1642.16 | 39.33  | 4.88 | 89.61 | 46.08 | 48.58 | 2.37 | 2.51 | 43.94 | 6.80 | 4.41 | 58.90 | 78.60 | 16118.76 | 86732.53 |
|          | 1998 | 62.99 | 55.97 | 7.02 | 1645.29 | 49.51  | 5.63 | 85.50 | 41.11 | 51.92 | 2.92 | 2.71 | 44.45 | 6.83 | 4.29 | 60.30 | 79.30 | 22838.19 | 86814.35 |
|          | 1999 | 69.34 | 61.40 | 7.94 | 1572.25 | 55.12  | 6.21 | 88.15 | 46.97 | 46.72 | 2.90 | 3.31 | 44.95 | 6.86 | 4.17 | 61.80 | 80.10 | 13997.56 | 86891.09 |
|          | 2000 | 69.55 | 61.59 | 7.96 | 1620.06 | 76.28  | 6.63 | 94.96 | 43.47 | 54.22 | 3.59 | 3.03 | 45.46 | 6.88 | 4.06 | 63.30 | 80.80 | 21929.62 | 86972.59 |
|          | 2001 | 69.71 | 61.74 | 7.98 | 1622.21 | 82.60  | 6.88 | 95.52 | 45.29 | 52.59 | 3.62 | 3.26 | 45.96 | 6.88 | 3.94 | 64.70 | 81.50 | 12536.91 | 87065.03 |
|          | 2002 | 69.89 | 61.89 | 8.00 | 1641.40 | 88.08  | 7.28 | 95.88 | 44.46 | 53.64 | 3.91 | 3.38 | 46.59 | 6.89 | 3.82 | 66.20 | 82.30 | 14868.59 | 87167.45 |
|          | 2003 | 70.03 | 62.02 | 8.01 | 1674.40 | 103.07 | 8.29 | 93.49 | 40.14 | 57.06 | 4.73 | 3.56 | 47.23 | 6.88 | 3.69 | 67.60 | 83.00 | 22792.46 | 87263.52 |
|          | 2004 | 70.29 | 62.24 | 8.05 | 1736.69 | 103.63 | 7.89 | 93.20 | 43.50 | 53.33 | 4.21 | 3.68 | 47.88 | 6.88 | 3.57 | 69.10 | 83.80 | 15006.24 | 87363.92 |
|          | 2005 | 70.56 | 62.48 | 8.09 | 1799.49 | 110.82 | 7.81 | 94.15 | 47.09 | 49.98 | 3.91 | 3.91 | 48.52 | 6.86 | 3.45 | 70.50 | 84.50 | 23206.91 | 87460.02 |
|          | 2006 | 70.83 | 62.71 | 8.12 | 1874.95 | 118.92 | 7.63 | 94.62 | 51.37 | 45.71 | 3.49 | 4.14 | 49.16 | 6.85 | 3.33 | 71.90 | 85.20 | 16686.65 | 87503.16 |
|          | 2007 | 71.08 | 62.90 | 8.17 | 1947.96 | 136.79 | 7.89 | 94.63 | 46.10 | 46.10 | 3.64 | 4.25 | 49.80 | 6.83 | 3.20 | 73.30 | 85.90 | 19178.53 | 87545.10 |
|          | 2008 | 71.26 | 63.06 | 8.20 | 1987.91 | 160.65 | 8.40 | 94.60 | 52.65 | 44.34 | 3.73 | 4.68 | 50.44 | 6.81 | 3.09 | 74.70 | 86.60 | 19785.86 | 87584.05 |
|          | 2009 | 71.48 | 63.25 | 8.23 | 1900.38 | 174.67 | 8.84 | 94.25 | 45.70 | 51.51 | 4.55 | 4.29 | 51.07 | 6.81 | 2.98 | 76.00 | 87.30 | 19877.56 | 87613.24 |
|          | 2010 | 71.57 | 63.34 | 8.23 | 1932.86 | 178.39 | 8.45 | 94.25 | 47.24 | 49.88 | 4.22 | 4.24 | 51.70 | 6.82 | 2.87 | 77.40 | 88.00 | 19663.72 | 87655.35 |

|      |       |       |      |         |        |      |       |       |       |      |      |       |      |      |       |       |          |          |
|------|-------|-------|------|---------|--------|------|-------|-------|-------|------|------|-------|------|------|-------|-------|----------|----------|
| 2011 | 71.80 | 63.52 | 8.28 | 1969.31 | 199.10 | 8.57 | 92.54 | 50.24 | 45.71 | 3.92 | 4.65 | 52.32 | 6.83 | 2.78 | 78.70 | 88.70 | 20084.14 | 87670.71 |
| 2012 | 71.83 | 63.55 | 8.28 | 2013.48 | 234.23 | 9.78 | 90.44 | 49.25 | 45.54 | 4.45 | 5.33 | 52.93 | 6.85 | 2.69 | 80.00 | 89.30 | 20467.16 | 87707.90 |
| 2013 | 72.14 | 63.80 | 8.33 | 2033.32 | 214.19 | 9.15 | 88.97 | 45.63 | 48.71 | 4.46 | 4.69 | 53.54 | 6.89 | 2.62 | 81.30 | 90.00 | -        | 87753.71 |
| 2014 | 72.31 | 63.95 | 8.36 | 2059.47 | 212.32 | 8.72 | 88.07 | 43.46 | 50.65 | 4.42 | 4.30 | 54.14 | 6.96 | 2.56 | 82.60 | 90.60 | -        | 87800.67 |
| 2015 | 72.48 | 64.09 | 8.39 | 2098.34 | -      | -    | -     | -     | -     | -    | -    | 54.73 | 7.05 | 2.51 | 82.60 | 91.20 | -        | 87854.06 |
| 2016 | 72.67 | 64.27 | 8.40 | 2137.81 | -      | -    | -     | -     | -     | -    | -    | 55.32 | 7.17 | -    | -     | -     | -        | 87919.08 |
| 2017 | 73.98 | 64.91 | 9.07 | -       | -      | -    | -     | -     | -     | -    | -    | -     | -    | -    | -     | -     | -        | -        |

|         |      |       |       |       |          |         |      |        |       |       |      |      |       |       |      |       |        |          |          |
|---------|------|-------|-------|-------|----------|---------|------|--------|-------|-------|------|------|-------|-------|------|-------|--------|----------|----------|
| Hungary | 1995 | 70.07 | 61.08 | 8.99  | 8952.04  | 323.01  | 7.22 | 100.00 | 16.04 | 83.96 | 6.07 | 1.16 | 65.21 | 21.08 | 1.57 | 98.00 | 97.10  | 77421.42 | 91641.87 |
|         | 1996 | 70.38 | 61.36 | 9.03  | 8968.70  | 315.02  | 6.99 | 100.00 | 18.40 | 81.60 | 5.71 | 1.29 | 65.08 | 21.35 | 1.46 | 98.00 | 97.30  | 80713.52 | 91729.71 |
|         | 1997 | 70.77 | 61.68 | 9.08  | 9286.96  | 308.51  | 6.74 | 100.00 | 18.72 | 81.28 | 5.48 | 1.26 | 64.96 | 21.63 | 1.37 | 98.00 | 97.50  | 78760.59 | 91830.00 |
|         | 1998 | 71.10 | 61.98 | 9.13  | 9702.89  | 334.76  | 7.08 | 88.44  | 22.30 | 74.78 | 5.29 | 1.78 | 64.83 | 21.88 | 1.32 | 98.00 | 97.70  | 77888.81 | 91926.80 |
|         | 1999 | 71.44 | 62.27 | 9.17  | 10040.51 | 344.64  | 7.21 | 89.96  | 24.85 | 72.37 | 5.22 | 1.99 | 64.70 | 22.07 | 1.28 | 98.00 | 98.00  | 78178.00 | 92027.24 |
|         | 2000 | 71.80 | 62.61 | 9.19  | 10490.35 | 325.71  | 7.06 | 89.77  | 26.27 | 70.74 | 4.99 | 2.07 | 64.58 | 22.18 | 1.32 | 98.00 | 98.20  | 75482.06 | 92122.16 |
|         | 2001 | 72.22 | 62.91 | 9.30  | 10918.25 | 374.28  | 7.11 | 89.27  | 27.69 | 68.98 | 4.91 | 2.21 | 64.67 | 22.36 | 1.31 | 98.00 | 98.40  | 75969.17 | 92161.76 |
|         | 2002 | 72.53 | 63.17 | 9.36  | 11445.19 | 495.38  | 7.47 | 88.22  | 26.28 | 70.21 | 5.24 | 2.22 | 65.08 | 22.46 | 1.30 | 98.00 | 98.60  | 74621.99 | 92214.93 |
|         | 2003 | 72.72 | 63.34 | 9.39  | 11919.77 | 705.83  | 8.42 | 88.19  | 25.50 | 71.09 | 5.99 | 2.44 | 65.49 | 22.52 | 1.27 | 98.00 | 98.80  | 76989.23 | 92266.05 |
|         | 2004 | 72.92 | 63.51 | 9.42  | 12544.09 | 828.14  | 8.08 | 81.93  | 24.91 | 69.60 | 5.63 | 2.46 | 65.90 | 22.58 | 1.28 | 98.00 | 99.00  | 75935.95 | 92320.66 |
|         | 2005 | 73.13 | 63.74 | 9.39  | 13120.62 | 922.78  | 8.28 | 83.40  | 25.00 | 70.03 | 5.80 | 2.48 | 66.35 | 22.68 | 1.31 | 98.00 | 99.20  | 75543.76 | 92371.88 |
|         | 2006 | 73.37 | 63.93 | 9.43  | 13647.15 | 922.33  | 8.10 | 80.12  | 24.22 | 69.77 | 5.65 | 2.45 | 66.86 | 22.84 | 1.34 | 98.00 | 99.40  | 75140.64 | 92347.84 |
|         | 2007 | 73.62 | 64.05 | 9.56  | 13727.73 | 1037.58 | 7.51 | 77.56  | 67.26 | 67.26 | 5.05 | 2.46 | 67.37 | 23.01 | 1.32 | 98.00 | 99.70  | 72331.25 | 92328.69 |
|         | 2008 | 73.93 | 64.29 | 9.64  | 13869.44 | 1145.80 | 7.33 | 77.98  | 25.69 | 67.05 | 4.91 | 2.41 | 67.87 | 23.16 | 1.35 | 98.00 | 99.90  | 71578.85 | 92320.27 |
|         | 2009 | 74.27 | 64.55 | 9.71  | 12974.14 | 976.78  | 7.55 | 73.86  | 25.35 | 65.68 | 4.96 | 2.59 | 68.37 | 23.25 | 1.32 | 98.00 | 100.00 | 65812.14 | 92329.82 |
|         | 2010 | 74.61 | 64.91 | 9.70  | 13092.23 | 1019.85 | 7.85 | 75.92  | 26.43 | 65.19 | 5.12 | 2.73 | 68.86 | 23.31 | 1.25 | 98.00 | 100.00 | 66250.77 | 92368.09 |
|         | 2011 | 74.99 | 65.12 | 9.87  | 13347.58 | 1098.71 | 7.84 | 76.20  | 27.31 | 64.16 | 5.03 | 2.81 | 69.35 | 23.73 | 1.23 | 98.00 | 100.00 | 64385.00 | 92413.14 |
|         | 2012 | 75.30 | 65.37 | 9.93  | 13196.15 | 991.27  | 7.74 | 77.89  | 28.48 | 63.43 | 4.91 | 2.83 | 69.83 | 24.12 | 1.34 | 98.00 | 100.00 | 62988.40 | 92458.18 |
|         | 2013 | 75.56 | 65.58 | 9.99  | 13509.92 | 1021.07 | 7.53 | 78.48  | 27.33 | 65.17 | 4.91 | 2.62 | 70.31 | 24.52 | 1.35 | 98.00 | 100.00 | -        | 92462.55 |
|         | 2014 | 75.70 | 65.69 | 10.01 | 14119.07 | 1036.62 | 7.40 | 78.16  | 26.59 | 65.98 | 4.88 | 2.52 | 70.77 | 25.04 | 1.44 | 98.00 | 100.00 | -        | 92463.04 |
|         | 2015 | 75.75 | 65.73 | 10.02 | 14629.24 | -       | -    | -      | -     | -     | -    | -    | 71.23 | 25.71 | 1.44 | 98.00 | 100.00 | -        | 92475.56 |
|         | 2016 | 75.75 | 65.82 | 9.92  | 14991.19 | -       | -    | -      | -     | -     | -    | -    | 71.67 | 26.63 | -    | -     | -      | -        | 92507.93 |

|         |      |       |       |       |          |         |       |        |       |       |      |      |       |       |      |       |        |            |          |
|---------|------|-------|-------|-------|----------|---------|-------|--------|-------|-------|------|------|-------|-------|------|-------|--------|------------|----------|
|         | 2017 | 76.81 | 65.78 | 11.03 | -        | -       | -     | -      | -     | -     | -    | -    | -     | -     | -    | -     | -      | -          | -        |
| Iceland | 1995 | 78.49 | 68.36 | 10.13 | 30178.05 | 2156.82 | 8.21  | 100.01 | 16.07 | 83.93 | 6.89 | 1.32 | 91.63 | 17.48 | 2.08 | 98.80 | 100.00 | 20878.68   | 91560.02 |
|         | 1996 | 79.00 | 68.81 | 10.19 | 31451.82 | 2225.12 | 8.16  | 100.01 | 16.75 | 83.25 | 6.80 | 1.37 | 91.80 | 17.58 | 2.12 | 98.80 | 100.00 | 21181.61   | 91621.32 |
|         | 1997 | 79.17 | 68.96 | 10.21 | 32727.90 | 2217.90 | 7.91  | 100.00 | 17.94 | 82.06 | 6.49 | 1.42 | 91.96 | 17.66 | 2.04 | 98.80 | 100.00 | 21089.45   | 91705.81 |
|         | 1998 | 79.42 | 69.17 | 10.26 | 34505.69 | 2718.16 | 8.73  | 93.22  | 18.11 | 80.58 | 7.04 | 1.70 | 92.12 | 17.74 | 2.05 | 98.80 | 100.00 | 3585.22    | 91820.03 |
|         | 1999 | 79.63 | 69.34 | 10.30 | 35455.89 | 3055.93 | 9.44  | 93.24  | 16.42 | 82.39 | 7.78 | 1.66 | 92.27 | 17.80 | 1.99 | 98.80 | 100.00 | 3657.94    | 91919.36 |
|         | 2000 | 79.89 | 69.54 | 10.35 | 36610.69 | 2966.40 | 9.28  | 93.72  | 17.48 | 81.35 | 7.54 | 1.73 | 92.40 | 17.81 | 2.08 | 98.80 | 100.00 | 4122.34    | 92011.01 |
|         | 2001 | 80.20 | 69.79 | 10.41 | 37512.27 | 2616.10 | 9.12  | 93.41  | 17.58 | 81.18 | 7.41 | 1.72 | 92.53 | 17.84 | 1.95 | 98.80 | 100.00 | 3830.92    | 92074.76 |
|         | 2002 | 80.47 | 70.01 | 10.47 | 37295.93 | 3150.77 | 9.86  | 92.93  | 16.79 | 81.93 | 8.07 | 1.78 | 92.66 | 17.84 | 1.93 | 98.80 | 100.00 | 3963.39    | 92147.49 |
|         | 2003 | 80.73 | 70.21 | 10.52 | 37942.34 | 3945.30 | 10.07 | 92.86  | 16.99 | 81.71 | 8.23 | 1.84 | 92.79 | 17.83 | 1.99 | 98.80 | 100.00 | 3941.86    | 92195.01 |
|         | 2004 | 80.97 | 70.40 | 10.57 | 40657.07 | 4521.68 | 9.59  | 92.93  | 17.38 | 81.30 | 7.79 | 1.79 | 92.91 | 17.84 | 2.04 | 98.80 | 100.00 | 4023.27    | 92240.38 |
|         | 2005 | 81.19 | 70.58 | 10.62 | 42701.59 | 5254.40 | 9.21  | 92.58  | 17.19 | 81.43 | 7.50 | 1.71 | 93.04 | 17.89 | 2.05 | 98.80 | 100.00 | 3980.63    | 92312.25 |
|         | 2006 | 81.35 | 70.71 | 10.64 | 43796.69 | 5094.19 | 8.96  | 92.01  | 16.58 | 81.98 | 7.35 | 1.62 | 93.16 | 17.78 | 2.08 | 98.80 | 100.00 | 4230.93    | 92349.21 |
|         | 2007 | 81.58 | 70.90 | 10.68 | 46695.21 | 6057.86 | 8.75  | 91.59  | 82.55 | 82.55 | 7.23 | 1.53 | 93.28 | 17.71 | 2.09 | 98.80 | 100.00 | 4449.11    | 92359.35 |
|         | 2008 | 81.78 | 71.06 | 10.72 | 46531.31 | 4892.20 | 8.80  | 91.54  | 15.90 | 82.63 | 7.27 | 1.53 | 93.40 | 17.68 | 2.15 | 98.80 | 100.00 | 5043.32    | 92322.37 |
|         | 2009 | 81.90 | 71.15 | 10.75 | 43152.69 | 3671.31 | 9.12  | 91.97  | 16.55 | 82.01 | 7.48 | 1.64 | 93.51 | 17.73 | 2.23 | 98.80 | 100.00 | 5144.29    | 92262.66 |
|         | 2010 | 82.03 | 71.23 | 10.80 | 41676.45 | 3690.42 | 8.86  | 92.71  | 18.21 | 80.36 | 7.12 | 1.74 | 93.62 | 17.87 | 2.20 | 98.80 | 100.00 | 5390.98    | 92253.80 |
|         | 2011 | 82.15 | 71.34 | 10.81 | 42374.97 | 3985.00 | 8.65  | 92.53  | 17.98 | 80.57 | 6.97 | 1.68 | 93.73 | 18.31 | 2.02 | 98.80 | 100.00 | 5530.26    | 92274.20 |
|         | 2012 | 82.23 | 71.41 | 10.82 | 42663.28 | 3856.83 | 8.68  | 92.48  | 17.99 | 80.55 | 6.99 | 1.69 | 93.84 | 18.83 | 2.04 | 98.80 | 100.00 | 5514.85    | 92306.16 |
|         | 2013 | 82.25 | 71.44 | 10.81 | 44126.03 | 4182.44 | 8.75  | 92.38  | 17.80 | 80.73 | 7.07 | 1.69 | 93.94 | 19.44 | 1.93 | 98.80 | 100.00 | -          | 92372.18 |
|         | 2014 | 82.23 | 71.43 | 10.80 | 44477.94 | 4661.62 | 8.86  | 92.18  | 17.48 | 81.04 | 7.18 | 1.68 | 94.04 | 20.10 | 1.93 | 98.80 | 100.00 | -          | 92465.85 |
|         | 2015 | 82.24 | 71.45 | 10.79 | 45820.06 | -       | -     | -      | -     | -     | -    | -    | 94.14 | 20.79 | 1.93 | 98.80 | 100.00 | -          | 92541.28 |
|         | 2016 | 82.27 | 71.48 | 10.79 | 48613.89 | -       | -     | -      | -     | -     | -    | -    | 94.23 | 21.40 | -    | -     | -      | -          | 92598.66 |
|         | 2017 | 82.75 | 71.26 | 11.49 | -        | -       | -     | -      | -     | -     | -    | -    | -     | -     | -    | -     | -      | -          | -        |
| India   | 1995 | 60.73 | 52.20 | 8.53  | 622.30   | 15.82   | 4.02  | 91.36  | 67.45 | 26.17 | 1.05 | 2.97 | 26.61 | 6.85  | 3.65 | 20.80 | 75.60  | 1651503.01 | 91063.61 |
|         | 1996 | 61.03 | 52.46 | 8.56  | 656.70   | 15.94   | 3.90  | 91.03  | 67.51 | 25.83 | 1.01 | 2.89 | 26.82 | 6.95  | 3.58 | 21.70 | 76.60  | 1708836.97 | 91092.15 |
|         | 1997 | 61.28 | 52.69 | 8.59  | 670.61   | 18.43   | 4.25  | 91.92  | 68.71 | 25.25 | 1.07 | 3.18 | 27.03 | 7.03  | 3.51 | 22.70 | 77.60  | 1761537.39 | 91127.30 |
|         | 1998 | 61.61 | 52.97 | 8.64  | 699.07   | 18.48   | 4.30  | 91.84  | 68.23 | 25.70 | 1.10 | 3.19 | 27.24 | 7.10  | 3.45 | 23.70 | 78.60  | 1768965.00 | 91170.10 |
|         | 1999 | 61.94 | 53.24 | 8.70  | 747.25   | 18.28   | 4.03  | 91.02  | 65.46 | 28.08 | 1.13 | 2.90 | 27.45 | 7.17  | 3.38 | 24.60 | 79.60  | 1956039.00 | 91214.14 |

|      |       |       |      |         |       |      |       |       |       |      |      |       |      |      |       |       |            |          |
|------|-------|-------|------|---------|-------|------|-------|-------|-------|------|------|-------|------|------|-------|-------|------------|----------|
| 2000 | 62.29 | 53.54 | 8.75 | 762.31  | 19.61 | 4.26 | 91.81 | 67.86 | 26.09 | 1.11 | 3.15 | 27.67 | 7.23 | 3.31 | 25.60 | 80.60 | 1885189.00 | 91265.53 |
| 2001 | 62.62 | 53.81 | 8.80 | 785.34  | 20.94 | 4.50 | 92.41 | 70.26 | 23.97 | 1.08 | 3.42 | 27.92 | 7.33 | 3.24 | 26.60 | 81.50 | 1875600.85 | 91286.94 |
| 2002 | 63.00 | 54.14 | 8.86 | 801.51  | 21.06 | 4.40 | 91.92 | 70.50 | 23.31 | 1.03 | 3.38 | 28.24 | 7.43 | 3.18 | 27.60 | 82.50 | 1917294.66 | 91313.99 |
| 2003 | 63.40 | 54.48 | 8.92 | 850.29  | 23.65 | 4.30 | 91.61 | 70.61 | 22.92 | 0.98 | 3.31 | 28.57 | 7.51 | 3.11 | 28.60 | 83.50 | 1976449.15 | 91345.73 |
| 2004 | 63.77 | 54.79 | 8.98 | 902.91  | 26.80 | 4.22 | 89.55 | 67.85 | 24.23 | 1.02 | 3.20 | 28.90 | 7.58 | 3.04 | 29.60 | 84.50 | 2090334.85 | 91376.90 |
| 2005 | 64.16 | 55.13 | 9.03 | 971.23  | 31.34 | 4.28 | 89.65 | 65.90 | 26.49 | 1.13 | 3.15 | 29.24 | 7.64 | 2.97 | 30.60 | 85.50 | 2117460.59 | 91415.84 |
| 2006 | 64.55 | 55.50 | 9.05 | 1044.89 | 34.64 | 4.25 | 89.03 | 65.75 | 26.15 | 1.11 | 3.14 | 29.57 | 7.73 | 2.90 | 31.60 | 86.50 | 2232760.11 | 91406.07 |
| 2007 | 64.93 | 55.83 | 9.11 | 1130.09 | 43.21 | 4.23 | 88.20 | 26.02 | 26.02 | 1.10 | 3.13 | 29.91 | 7.80 | 2.82 | 32.60 | 87.40 | 2382011.76 | 91400.94 |
| 2008 | 65.32 | 56.18 | 9.14 | 1156.93 | 46.91 | 4.34 | 87.96 | 64.39 | 26.79 | 1.16 | 3.18 | 30.25 | 7.87 | 2.75 | 33.60 | 88.40 | 2438714.28 | 91407.93 |
| 2009 | 65.73 | 56.55 | 9.19 | 1237.34 | 48.23 | 4.38 | 87.84 | 63.33 | 27.90 | 1.22 | 3.15 | 30.59 | 7.93 | 2.67 | 34.60 | 89.40 | 2594639.92 | 91420.71 |
| 2010 | 66.12 | 56.92 | 9.20 | 1345.77 | 59.18 | 4.28 | 86.96 | 63.37 | 27.13 | 1.16 | 3.12 | 30.93 | 7.99 | 2.60 | 35.50 | 90.30 | 2771456.76 | 91446.37 |
| 2011 | 66.51 | 57.21 | 9.30 | 1416.40 | 65.71 | 4.33 | 88.43 | 64.43 | 27.14 | 1.18 | 3.16 | 31.28 | 8.10 | 2.53 | 36.50 | 91.30 | 2828845.83 | 91472.45 |
| 2012 | 66.91 | 57.54 | 9.37 | 1474.97 | 64.93 | 4.39 | 88.85 | 64.88 | 26.97 | 1.18 | 3.21 | 31.63 | 8.19 | 2.48 | 37.50 | 92.20 | 3002894.93 | 91510.88 |
| 2013 | 67.28 | 57.84 | 9.44 | 1550.14 | 68.53 | 4.53 | 89.14 | 63.81 | 28.41 | 1.29 | 3.24 | 31.99 | 8.29 | 2.43 | 38.50 | 93.10 | -          | 91562.27 |
| 2014 | 67.72 | 58.19 | 9.53 | 1646.78 | 74.99 | 4.69 | 89.21 | 62.42 | 30.04 | 1.41 | 3.28 | 32.37 | 8.42 | 2.38 | 39.50 | 94.10 | -          | 91621.37 |
| 2015 | 68.10 | 58.48 | 9.61 | 1758.04 | -     | -    | -     | -     | -     | -    | -    | 32.75 | 8.58 | 2.35 | 39.60 | 94.10 | -          | 91695.05 |
| 2016 | 68.55 | 58.89 | 9.66 | 1861.49 | -     | -    | -     | -     | -     | -    | -    | 33.14 | 8.80 | -    | -     | -     | -          | 91768.37 |
| 2017 | 68.97 | 59.37 | 9.60 | -       | -     | -    | -     | -     | -     | -    | -    | -     | -    | -    | -     | -     | -          | -        |

|           |      |       |       |      |         |       |      |       |       |       |      |      |       |      |      |       |       |            |          |
|-----------|------|-------|-------|------|---------|-------|------|-------|-------|-------|------|------|-------|------|------|-------|-------|------------|----------|
| Indonesia | 1995 | 65.74 | 58.02 | 7.72 | 2219.81 | 20.08 | 1.96 | 72.94 | 46.51 | 36.24 | 0.71 | 1.25 | 36.08 | 6.68 | 2.69 | 41.00 | 73.70 | 1315570.67 | 88315.16 |
|           | 1996 | 66.15 | 58.39 | 7.76 | 2357.96 | 22.59 | 1.99 | 73.13 | 46.37 | 36.58 | 0.73 | 1.26 | 37.24 | 6.81 | 2.63 | 42.30 | 74.50 | 1314060.75 | 88353.72 |
|           | 1997 | 66.48 | 58.67 | 7.81 | 2433.34 | 20.48 | 1.93 | 72.99 | 47.33 | 35.16 | 0.68 | 1.25 | 38.41 | 6.93 | 2.58 | 43.50 | 75.40 | 5040841.30 | 88402.05 |
|           | 1998 | 66.77 | 58.91 | 7.85 | 2084.23 | 9.53  | 2.06 | 74.33 | 48.72 | 34.45 | 0.71 | 1.35 | 39.59 | 7.05 | 2.54 | 44.70 | 76.30 | 1191187.16 | 88456.07 |
|           | 1999 | 66.98 | 59.10 | 7.88 | 2071.55 | 14.89 | 2.22 | 75.56 | 49.24 | 34.83 | 0.77 | 1.45 | 40.79 | 7.17 | 2.52 | 45.90 | 77.10 | 668887.60  | 88513.45 |
|           | 2000 | 67.24 | 59.31 | 7.94 | 2143.39 | 15.43 | 1.98 | 72.66 | 46.04 | 36.63 | 0.72 | 1.25 | 42.00 | 7.29 | 2.51 | 47.10 | 77.90 | 622464.65  | 88578.88 |
|           | 2001 | 67.54 | 59.58 | 7.96 | 2190.77 | 16.70 | 2.23 | 73.56 | 41.80 | 43.17 | 0.96 | 1.27 | 42.78 | 7.36 | 2.51 | 48.10 | 78.60 | 849945.65  | 88614.10 |
|           | 2002 | 67.79 | 59.81 | 7.98 | 2257.75 | 20.42 | 2.27 | 72.17 | 44.04 | 38.98 | 0.88 | 1.38 | 43.57 | 7.41 | 2.51 | 49.20 | 79.30 | 1720445.17 | 88652.90 |
|           | 2003 | 68.04 | 60.03 | 8.02 | 2333.10 | 27.00 | 2.53 | 74.11 | 44.41 | 40.07 | 1.02 | 1.52 | 44.35 | 7.42 | 2.51 | 50.20 | 80.00 | 888646.15  | 88698.43 |
|           | 2004 | 66.48 | 58.71 | 7.77 | 2416.84 | 27.24 | 2.37 | 73.88 | 44.71 | 39.48 | 0.93 | 1.43 | 45.15 | 7.40 | 2.52 | 51.20 | 80.60 | 1060213.55 | 88751.04 |
|           | 2005 | 68.54 | 60.44 | 8.10 | 2519.51 | 35.25 | 2.79 | 76.70 | 54.62 | 28.79 | 0.80 | 1.99 | 45.94 | 7.35 | 2.51 | 52.10 | 81.30 | 1171042.59 | 88814.66 |

|      |       |       |      |         |        |      |       |       |       |      |      |       |      |      |       |       |            |          |
|------|-------|-------|------|---------|--------|------|-------|-------|-------|------|------|-------|------|------|-------|-------|------------|----------|
| 2006 | 68.79 | 60.65 | 8.14 | 2621.96 | 46.20  | 2.91 | 76.32 | 52.34 | 31.41 | 0.91 | 1.99 | 46.73 | 7.40 | 2.51 | 53.10 | 81.90 | 2381293.72 | 88883.57 |
| 2007 | 69.06 | 60.86 | 8.20 | 2750.62 | 57.65  | 3.10 | 77.16 | 36.35 | 36.35 | 1.13 | 1.97 | 47.53 | 7.42 | 2.51 | 54.10 | 82.60 | 772946.22  | 88946.92 |
| 2008 | 69.32 | 61.06 | 8.26 | 2876.89 | 60.83  | 2.81 | 76.47 | 49.06 | 35.85 | 1.01 | 1.80 | 48.33 | 7.42 | 2.50 | 55.10 | 83.20 | 796581.92  | 89007.50 |
| 2009 | 69.58 | 61.26 | 8.31 | 2970.04 | 63.93  | 2.83 | 76.67 | 49.00 | 36.08 | 1.02 | 1.81 | 49.12 | 7.39 | 2.49 | 56.00 | 83.80 | 1148285.68 | 89074.12 |
| 2010 | 69.87 | 61.51 | 8.36 | 3113.48 | 85.65  | 2.74 | 75.76 | 47.21 | 37.69 | 1.03 | 1.71 | 49.92 | 7.33 | 2.48 | 57.00 | 84.50 | 744790.02  | 89153.27 |
| 2011 | 70.19 | 61.77 | 8.42 | 3262.75 | 98.97  | 2.71 | 76.35 | 47.39 | 37.92 | 1.03 | 1.68 | 50.71 | 7.38 | 2.47 | 57.90 | 85.10 | 763553.16  | 89142.22 |
| 2012 | 70.51 | 62.03 | 8.48 | 3415.35 | 107.24 | 2.90 | 75.09 | 45.35 | 39.61 | 1.15 | 1.75 | 51.49 | 7.42 | 2.46 | 58.80 | 85.70 | 780550.76  | 89167.35 |
| 2013 | 70.81 | 62.27 | 8.54 | 3560.11 | 106.02 | 2.93 | 75.33 | 45.63 | 39.43 | 1.15 | 1.77 | 52.25 | 7.47 | 2.44 | 59.70 | 86.20 | -          | 89216.23 |
| 2014 | 71.09 | 62.49 | 8.60 | 3692.94 | 99.41  | 2.85 | 75.32 | 46.87 | 37.78 | 1.08 | 1.77 | 53.00 | 7.52 | 2.41 | 60.60 | 86.80 | -          | 89287.52 |
| 2015 | 71.38 | 62.71 | 8.67 | 3827.55 | -      | -    | -     | -     | -     | -    | -    | 53.74 | 7.60 | 2.39 | 60.80 | 87.40 | -          | 89374.43 |
| 2016 | 71.66 | 62.95 | 8.71 | 3974.06 | -      | -    | -     | -     | -     | -    | -    | 54.47 | 7.75 | -    | -     | -     | -          | 89460.94 |
| 2017 | 71.48 | 62.65 | 8.82 | -       | -      | -    | -     | -     | -     | -    | -    | -     | -    | -    | -     | -     | -          | -        |

|      |      |       |       |       |         |        |      |        |       |       |      |       |       |      |       |       |           |           |          |
|------|------|-------|-------|-------|---------|--------|------|--------|-------|-------|------|-------|-------|------|-------|-------|-----------|-----------|----------|
| Iraq | 1995 | 65.24 | 55.28 | 9.97  | 2322.87 | -      | -    | -      | -     | -     | -    | 68.78 | 6.89  | 5.42 | 71.50 | 78.20 | 107285.11 | 89420.99  |          |
|      | 1996 | 65.23 | 55.35 | 9.88  | 2500.01 | -      | -    | -      | -     | -     | -    | 68.59 | 6.79  | 5.33 | 72.20 | 78.60 | 98175.48  | 89391.76  |          |
|      | 1997 | 64.95 | 55.18 | 9.77  | 2937.47 | -      | -    | -      | -     | -     | -    | 68.41 | 6.71  | 5.22 | 73.00 | 78.90 | 103253.91 | 89378.25  |          |
|      | 1998 | 65.70 | 55.80 | 9.90  | 3839.83 | -      | -    | -      | -     | -     | -    | 68.39 | 6.63  | 5.11 | 73.70 | 79.40 | 106026.11 | 89359.32  |          |
|      | 1999 | 65.98 | 56.05 | 9.93  | 4379.20 | -      | -    | -      | -     | -     | -    | 68.44 | 6.55  | 5.00 | 74.50 | 79.90 | 110878.99 | 89343.79  |          |
|      | 2000 | 65.96 | 56.06 | 9.90  | 4311.28 | -      | -    | -      | -     | -     | -    | 68.50 | 6.47  | 4.89 | 75.30 | 80.40 | 124402.47 | 89350.75  |          |
|      | 2001 | 66.54 | 56.55 | 9.99  | 4285.86 | -      | -    | -      | -     | -     | -    | 68.55 | 6.42  | 4.80 | 76.20 | 80.80 | 132843.68 | 89351.09  |          |
|      | 2002 | 66.35 | 56.44 | 9.91  | 3880.11 | -      | -    | -      | -     | -     | -    | 68.60 | 6.36  | 4.71 | 76.90 | 81.30 | 128686.16 | 89367.63  |          |
|      | 2003 | 64.96 | 55.35 | 9.61  | 2526.04 | 16.41  | 4.36 | 100.00 | 54.64 | 45.36 | 1.98 | 2.38  | 68.66 | 6.29 | 4.64  | 77.70 | 81.80     | 107790.88 | 89381.87 |
|      | 2004 | 65.19 | 55.55 | 9.64  | 3792.14 | 55.83  | 5.61 | 100.00 | 27.83 | 72.17 | 4.05 | 1.56  | 68.71 | 6.23 | 4.59  | 78.50 | 82.30     | 125423.58 | 89372.73 |
|      | 2005 | 64.74 | 55.28 | 9.46  | 3857.61 | 55.49  | 4.13 | 100.00 | 32.65 | 67.35 | 2.78 | 1.35  | 68.77 | 6.18 | 4.56  | 79.30 | 82.80     | 124611.70 | 89336.21 |
|      | 2006 | 63.77 | 54.41 | 9.36  | 4143.69 | 59.33  | 3.00 | 100.00 | 36.19 | 63.81 | 1.91 | 1.09  | 68.82 | 6.16 | 4.55  | 80.10 | 83.20     | 129502.48 | 89264.90 |
|      | 2007 | 64.22 | 54.74 | 9.48  | 4098.31 | 97.30  | 3.69 | 100.00 | 69.49 | 69.49 | 2.57 | 1.13  | 68.87 | 6.15 | 4.55  | 80.90 | 83.70     | 130078.49 | 89165.49 |
|      | 2008 | 66.12 | 56.24 | 9.89  | 4325.67 | 146.59 | 3.93 | 100.00 | 25.16 | 74.84 | 2.94 | 0.99  | 68.93 | 6.13 | 4.55  | 81.70 | 84.20     | 137871.12 | 89025.27 |
|      | 2009 | 66.83 | 56.78 | 10.05 | 4354.68 | 146.76 | 4.65 | 100.00 | 25.74 | 74.26 | 3.45 | 1.20  | 68.98 | 6.08 | 4.56  | 82.50 | 84.70     | 138423.77 | 88882.29 |
|      | 2010 | 67.20 | 57.08 | 10.12 | 4502.75 | 144.98 | 3.82 | 100.00 | 26.10 | 73.90 | 2.82 | 1.00  | 69.03 | 5.98 | 4.56  | 83.30 | 85.10     | 146903.73 | 88765.21 |
|      | 2011 | 67.54 | 57.33 | 10.21 | 4695.36 | 164.05 | 3.32 | 100.00 | 24.93 | 75.07 | 2.49 | 0.83  | 69.10 | 5.86 | 4.56  | 84.00 | 85.60     | 151457.06 | 88611.94 |



|        |      |       |       |       |          |         |      |       |       |       |      |      |       |       |      |        |        |           |          |
|--------|------|-------|-------|-------|----------|---------|------|-------|-------|-------|------|------|-------|-------|------|--------|--------|-----------|----------|
| Iran   | 1995 | 70.72 | 60.36 | 10.35 | 4298.12  | 67.59   | 3.74 | 97.01 | 53.59 | 44.76 | 1.68 | 2.07 | 60.24 | 6.97  | 3.22 | 73.80  | 93.00  | 370387.94 | 88753.33 |
|        | 1996 | 70.76 | 60.43 | 10.33 | 4496.29  | 85.52   | 3.64 | 97.22 | 51.13 | 47.41 | 1.73 | 1.91 | 61.09 | 6.98  | 2.96 | 74.80  | 93.30  | 385888.41 | 89090.06 |
|        | 1997 | 70.93 | 60.58 | 10.34 | 4475.08  | 109.23  | 4.00 | 96.52 | 49.67 | 48.54 | 1.94 | 2.06 | 61.85 | 6.98  | 2.73 | 75.90  | 93.50  | 402922.92 | 89416.94 |
|        | 1998 | 71.15 | 60.79 | 10.36 | 4483.09  | 133.21  | 4.40 | 96.93 | 49.88 | 48.54 | 2.14 | 2.27 | 62.59 | 6.96  | 2.53 | 76.90  | 93.70  | 410530.57 | 89731.80 |
|        | 1999 | 71.39 | 61.00 | 10.39 | 4491.20  | 176.52  | 4.39 | 96.22 | 55.42 | 42.40 | 1.86 | 2.53 | 63.32 | 6.94  | 2.36 | 77.90  | 93.90  | 425640.49 | 90008.88 |
|        | 2000 | 71.44 | 61.10 | 10.34 | 4676.87  | 229.50  | 4.47 | 96.23 | 56.16 | 41.64 | 1.86 | 2.61 | 64.04 | 6.91  | 2.21 | 78.90  | 94.10  | 448089.45 | 90251.04 |
|        | 2001 | 71.47 | 61.14 | 10.33 | 4719.91  | 291.68  | 5.02 | 95.38 | 53.71 | 43.69 | 2.19 | 2.83 | 64.76 | 6.96  | 2.09 | 79.90  | 94.30  | 460783.88 | 90359.94 |
|        | 2002 | 71.56 | 61.26 | 10.30 | 5034.67  | 107.59  | 5.39 | 90.09 | 53.49 | 40.62 | 2.19 | 3.20 | 65.47 | 7.01  | 2.00 | 80.80  | 94.50  | 483378.51 | 90457.49 |
|        | 2003 | 70.11 | 60.13 | 9.98  | 5403.71  | 110.83  | 5.42 | 87.83 | 49.75 | 43.36 | 2.35 | 3.07 | 66.17 | 7.05  | 1.93 | 81.80  | 94.70  | 516232.69 | 90529.30 |
|        | 2004 | 71.94 | 61.64 | 10.30 | 5572.91  | 144.96  | 5.89 | 89.19 | 55.27 | 38.03 | 2.24 | 3.65 | 66.87 | 7.10  | 1.87 | 82.80  | 94.90  | 552318.80 | 90597.63 |
|        | 2005 | 72.38 | 62.04 | 10.34 | 5684.96  | 177.77  | 6.06 | 89.22 | 54.89 | 38.48 | 2.33 | 3.73 | 67.56 | 7.13  | 1.83 | 83.80  | 95.10  | 576650.65 | 90656.59 |
|        | 2006 | 72.85 | 62.41 | 10.44 | 5901.64  | 204.26  | 5.95 | 88.54 | 50.30 | 43.20 | 2.57 | 3.38 | 68.24 | 7.07  | 1.81 | 84.80  | 95.20  | 619914.47 | 90668.99 |
|        | 2007 | 73.29 | 62.70 | 10.59 | 6311.79  | 254.35  | 5.84 | 88.32 | 41.48 | 41.48 | 2.42 | 3.42 | 68.86 | 7.01  | 1.79 | 85.70  | 95.40  | 650956.81 | 90679.46 |
|        | 2008 | 73.68 | 62.99 | 10.69 | 6256.88  | 314.55  | 6.28 | 86.67 | 53.04 | 38.80 | 2.44 | 3.85 | 69.46 | 6.96  | 1.78 | 86.70  | 95.50  | -         | 90681.60 |
|        | 2009 | 74.03 | 63.25 | 10.78 | 6247.69  | 380.76  | 7.63 | 87.23 | 54.32 | 37.73 | 2.88 | 4.75 | 70.05 | 6.91  | 1.77 | 87.60  | 95.60  | -         | 90680.29 |
|        | 2010 | 74.36 | 63.55 | 10.81 | 6531.93  | 455.45  | 8.02 | 86.79 | 57.74 | 33.48 | 2.68 | 5.33 | 70.63 | 6.89  | 1.77 | 88.60  | 95.80  | -         | 90715.26 |
|        | 2011 | 74.70 | 63.76 | 10.95 | 6622.67  | 545.23  | 7.12 | 85.24 | 55.58 | 34.80 | 2.48 | 4.65 | 71.20 | 6.86  | 1.76 | 89.30  | 95.90  | -         | 90691.53 |
|        | 2012 | 74.81 | 63.86 | 10.95 | 6052.52  | 510.59  | 6.98 | 81.30 | 50.01 | 38.48 | 2.69 | 4.30 | 71.77 | 6.84  | 1.74 | 89.60  | 96.00  | -         | 90707.86 |
|        | 2013 | 74.96 | 63.98 | 10.98 | 5964.18  | 414.70  | 6.49 | 81.30 | 47.06 | 42.11 | 2.73 | 3.76 | 72.32 | 6.86  | 1.73 | 89.90  | 96.10  | -         | 90738.42 |
|        | 2014 | 75.22 | 64.18 | 11.04 | 6161.10  | 350.74  | 6.89 | 81.30 | 47.80 | 41.20 | 2.84 | 4.05 | 72.86 | 6.92  | 1.71 | 89.90  | 96.20  | -         | 90806.52 |
|        | 2015 | 75.69 | 64.52 | 11.18 | 6007.00  | -       | -    | -     | -     | -     | -    | -    | 73.38 | 7.06  | 1.69 | 90.00  | 96.20  | -         | 90889.13 |
|        | 2016 | 75.94 | 64.79 | 11.15 | 6733.91  | -       | -    | -     | -     | -     | -    | -    | 73.88 | 7.33  | -    | -      | -      | -         | 90994.53 |
|        | 2017 | 77.35 | 65.74 | 11.61 | -        | -       | -    | -     | -     | -     | -    | -    | -     | -     | -    | -      | -      | -         | -        |
| Israel | 1995 | 77.02 | 67.34 | 9.68  | 24592.25 | 1315.72 | 7.35 | 85.85 | 25.73 | 67.39 | 4.95 | 2.20 | 90.87 | 15.91 | 2.90 | 100.00 | 100.00 | 53255.20  | 88368.86 |
|        | 1996 | 77.36 | 67.60 | 9.76  | 25230.31 | 1421.06 | 7.40 | 84.23 | 23.89 | 69.02 | 5.11 | 2.10 | 90.94 | 15.94 | 2.90 | 100.00 | 100.00 | 56520.49  | 88472.00 |
|        | 1997 | 77.67 | 67.84 | 9.82  | 25508.75 | 1470.44 | 7.56 | 83.23 | 24.76 | 68.05 | 5.14 | 2.25 | 91.01 | 15.98 | 2.94 | 100.00 | 100.00 | 58641.05  | 88561.79 |
|        | 1998 | 78.00 | 68.11 | 9.89  | 25970.83 | 1429.04 | 7.42 | 83.45 | 28.01 | 64.18 | 4.76 | 2.49 | 91.07 | 16.03 | 2.98 | 100.00 | 100.00 | 59555.16  | 88646.55 |
|        | 1999 | 78.29 | 68.33 | 9.96  | 26233.31 | 1359.28 | 7.16 | 80.36 | 26.57 | 64.25 | 4.60 | 2.37 | 91.14 | 16.10 | 2.97 | 100.00 | 100.00 | 60998.69  | 88723.56 |
|        | 2000 | 78.52 | 68.52 | 10.00 | 27636.34 | 1490.05 | 7.13 | 80.48 | 28.33 | 62.56 | 4.46 | 2.51 | 91.20 | 16.18 | 2.95 | 100.00 | 100.00 | 65619.39  | 88826.61 |

|      |       |       |       |          |         |      |       |       |       |      |      |       |       |      |        |        |          |          |
|------|-------|-------|-------|----------|---------|------|-------|-------|-------|------|------|-------|-------|------|--------|--------|----------|----------|
| 2001 | 78.64 | 68.60 | 10.04 | 26999.37 | 1531.73 | 7.61 | 80.56 | 29.06 | 62.01 | 4.72 | 2.74 | 91.27 | 16.17 | 2.92 | 100.00 | 100.00 | 65879.06 | 88820.59 |
| 2002 | 78.58 | 68.55 | 10.03 | 26503.84 | 1366.91 | 7.49 | 77.54 | 26.84 | 63.24 | 4.74 | 2.59 | 91.33 | 16.16 | 2.89 | 100.00 | 100.00 | 69487.80 | 88797.63 |
| 2003 | 79.07 | 68.96 | 10.11 | 26229.40 | 1394.67 | 7.44 | 75.95 | 27.62 | 61.69 | 4.59 | 2.70 | 91.39 | 16.15 | 2.95 | 100.00 | 100.00 | 71533.78 | 88787.05 |
| 2004 | 79.38 | 69.20 | 10.18 | 26947.44 | 1445.93 | 7.35 | 75.23 | 27.77 | 60.90 | 4.47 | 2.71 | 91.46 | 16.14 | 2.90 | 100.00 | 100.00 | 70576.27 | 88795.87 |
| 2005 | 79.75 | 69.51 | 10.24 | 27570.95 | 1515.13 | 7.44 | 75.51 | 29.25 | 59.29 | 4.41 | 2.88 | 91.52 | 16.13 | 2.84 | 100.00 | 100.00 | 71353.03 | 88813.38 |
| 2006 | 79.85 | 69.58 | 10.27 | 28499.33 | 1592.65 | 7.38 | 71.76 | 26.03 | 63.72 | 4.70 | 2.68 | 91.58 | 16.15 | 2.88 | 100.00 | 100.00 | 73591.54 | 88848.03 |
| 2007 | 80.27 | 69.90 | 10.37 | 29614.08 | 1813.20 | 7.37 | 70.89 | 61.89 | 61.89 | 4.56 | 2.81 | 91.64 | 16.18 | 2.90 | 100.00 | 100.00 | 77128.57 | 88881.50 |
| 2008 | 80.59 | 70.13 | 10.46 | 29962.01 | 2145.39 | 7.33 | 68.96 | 26.03 | 61.00 | 4.47 | 2.77 | 91.70 | 16.26 | 2.96 | 100.00 | 100.00 | 75238.55 | 88929.12 |
| 2009 | 80.93 | 70.38 | 10.54 | 29658.52 | 2057.35 | 7.46 | 68.94 | 26.13 | 61.15 | 4.56 | 2.83 | 91.76 | 16.45 | 2.96 | 100.00 | 100.00 | 75026.04 | 88975.41 |
| 2010 | 81.49 | 70.84 | 10.65 | 30642.94 | 2247.65 | 7.36 | 67.31 | 24.39 | 62.69 | 4.61 | 2.67 | 91.82 | 16.77 | 3.03 | 100.00 | 100.00 | 79072.44 | 89007.36 |
| 2011 | 81.70 | 71.01 | 10.70 | 31483.00 | 2460.50 | 7.39 | 67.03 | 24.52 | 62.46 | 4.62 | 2.71 | 91.89 | 16.98 | 2.98 | 100.00 | 100.00 | 81703.91 | 89000.12 |
| 2012 | 81.96 | 71.22 | 10.74 | 31507.48 | 2514.57 | 7.73 | 67.56 | 25.06 | 62.91 | 4.87 | 2.87 | 91.95 | 17.26 | 3.05 | 100.00 | 100.00 | 84044.43 | 88983.52 |
| 2013 | 82.07 | 71.32 | 10.75 | 32196.36 | 2853.69 | 7.89 | 68.92 | 26.51 | 61.54 | 4.86 | 3.04 | 92.01 | 17.62 | 3.03 | 100.00 | 100.00 | -        | 88979.50 |
| 2014 | 81.40 | 70.78 | 10.62 | 32661.29 | 2910.29 | 7.81 | 68.93 | 26.98 | 60.85 | 4.75 | 3.06 | 92.08 | 18.01 | 3.08 | 100.00 | 100.00 | -        | 88994.93 |
| 2015 | 82.08 | 71.36 | 10.72 | 32993.31 | -       | -    | -     | -     | -     | -    | -    | 92.14 | 18.42 | 3.09 | 100.00 | 100.00 | -        | 89004.29 |
| 2016 | 82.14 | 71.44 | 10.70 | 33673.13 | -       | -    | -     | -     | -     | -    | -    | 92.21 | 18.92 | -    | -      | -      | -        | 89031.40 |
| 2017 | 82.97 | 71.38 | 11.59 | -        | -       | -    | -     | -     | -     | -    | -    | -     | -     | -    | -      | -      | -        | -        |

|       |      |       |       |       |          |         |      |       |       |       |      |      |       |       |      |       |        |           |          |
|-------|------|-------|-------|-------|----------|---------|------|-------|-------|-------|------|------|-------|-------|------|-------|--------|-----------|----------|
| Italy | 1995 | 78.12 | 68.15 | 9.97  | 32829.88 | 1461.94 | 7.10 | 91.87 | 26.86 | 70.76 | 5.02 | 2.07 | 66.92 | 24.20 | 1.19 | 99.50 | 100.00 | 518470.76 | 92558.81 |
|       | 1996 | 78.33 | 68.37 | 9.97  | 33242.85 | 1657.17 | 7.19 | 91.33 | 26.78 | 70.68 | 5.08 | 2.11 | 66.98 | 24.73 | 1.20 | 99.50 | 100.00 | 507338.86 | 92546.47 |
|       | 1997 | 78.69 | 68.69 | 10.01 | 33835.07 | 1628.35 | 7.47 | 91.69 | 26.82 | 70.75 | 5.29 | 2.19 | 67.04 | 25.24 | 1.21 | 99.50 | 100.00 | 508373.86 | 92539.74 |
|       | 1998 | 78.97 | 68.94 | 10.03 | 34371.98 | 1681.17 | 7.55 | 91.87 | 27.39 | 70.19 | 5.30 | 2.25 | 67.10 | 25.75 | 1.21 | 99.50 | 100.00 | 519046.02 | 92541.12 |
|       | 1999 | 79.27 | 69.21 | 10.06 | 34902.26 | 1674.54 | 7.63 | 91.74 | 27.00 | 70.58 | 5.38 | 2.25 | 67.16 | 26.29 | 1.23 | 99.50 | 100.00 | 521472.01 | 92535.13 |
|       | 2000 | 79.60 | 69.48 | 10.13 | 36180.78 | 1587.96 | 7.91 | 90.78 | 25.34 | 72.09 | 5.70 | 2.21 | 67.22 | 26.88 | 1.26 | 99.50 | 100.00 | 547349.86 | 92558.76 |
|       | 2001 | 79.93 | 69.75 | 10.18 | 36801.29 | 1656.22 | 8.11 | 88.82 | 23.43 | 73.62 | 5.97 | 2.14 | 67.28 | 27.40 | 1.25 | 99.50 | 100.00 | 543360.17 | 92571.38 |
|       | 2002 | 80.17 | 69.96 | 10.21 | 36837.86 | 1829.93 | 8.23 | 88.41 | 23.13 | 73.84 | 6.08 | 2.15 | 67.38 | 27.95 | 1.27 | 99.50 | 100.00 | 550782.07 | 92592.64 |
|       | 2003 | 80.27 | 70.07 | 10.21 | 36729.98 | 2246.11 | 8.17 | 88.63 | 22.79 | 74.28 | 6.07 | 2.10 | 67.50 | 28.51 | 1.29 | 99.50 | 100.00 | 564951.18 | 92613.15 |
|       | 2004 | 80.72 | 70.42 | 10.30 | 37070.33 | 2658.15 | 8.49 | 89.86 | 22.00 | 75.52 | 6.41 | 2.08 | 67.62 | 29.01 | 1.34 | 99.50 | 100.00 | 562794.85 | 92625.26 |
|       | 2005 | 80.91 | 70.58 | 10.34 | 37238.94 | 2788.52 | 8.71 | 87.53 | 20.74 | 76.31 | 6.64 | 2.06 | 67.74 | 29.45 | 1.34 | 99.50 | 100.00 | 564114.95 | 92649.30 |
|       | 2006 | 81.09 | 70.73 | 10.36 | 37872.17 | 2951.59 | 8.82 | 86.87 | 20.44 | 76.47 | 6.74 | 2.07 | 67.86 | 29.86 | 1.37 | 99.50 | 100.00 | 563324.94 | 92668.46 |

|      |       |       |       |          |         |      |       |       |       |      |      |       |       |      |       |        |           |          |
|------|-------|-------|-------|----------|---------|------|-------|-------|-------|------|------|-------|-------|------|-------|--------|-----------|----------|
| 2007 | 81.27 | 70.88 | 10.39 | 38236.80 | 3210.65 | 8.48 | 88.05 | 76.49 | 76.49 | 6.49 | 1.99 | 67.97 | 30.18 | 1.40 | 99.50 | 100.00 | 547383.14 | 92692.09 |
| 2008 | 81.46 | 71.04 | 10.42 | 37585.34 | 3623.85 | 8.89 | 89.12 | 20.55 | 76.94 | 6.84 | 2.05 | 68.09 | 30.47 | 1.45 | 99.50 | 100.00 | 529283.80 | 92718.07 |
| 2009 | 81.57 | 71.13 | 10.44 | 35363.40 | 3488.47 | 9.41 | 85.58 | 19.69 | 76.99 | 7.25 | 2.17 | 68.21 | 30.82 | 1.45 | 99.50 | 100.00 | 480698.22 | 92755.71 |
| 2010 | 81.78 | 71.30 | 10.48 | 35849.37 | 3384.45 | 9.42 | 84.99 | 19.52 | 77.04 | 7.26 | 2.16 | 68.33 | 31.30 | 1.46 | 99.50 | 100.00 | 489460.13 | 92816.71 |
| 2011 | 81.92 | 71.42 | 10.50 | 35994.13 | 3559.50 | 9.27 | 84.32 | 20.96 | 75.14 | 6.97 | 2.31 | 68.44 | 31.91 | 1.44 | 99.50 | 100.00 | 482619.04 | 92880.64 |
| 2012 | 82.02 | 71.51 | 10.51 | 34885.30 | 3242.22 | 9.28 | 84.80 | 20.91 | 75.34 | 6.99 | 2.29 | 68.56 | 32.63 | 1.43 | 99.50 | 100.00 | 482634.00 | 92975.81 |
| 2013 | 82.24 | 71.67 | 10.56 | 33887.30 | 3294.85 | 9.22 | 84.58 | 20.64 | 75.59 | 6.97 | 2.25 | 68.69 | 33.43 | 1.39 | 99.50 | 100.00 | -         | 93091.82 |
| 2014 | 82.29 | 71.72 | 10.57 | 33615.97 | 3257.75 | 9.25 | 86.88 | 21.19 | 75.61 | 6.99 | 2.26 | 68.82 | 34.24 | 1.37 | 99.50 | 100.00 | -         | 93220.84 |
| 2015 | 82.33 | 71.75 | 10.58 | 33984.09 | -       | -    | -     | -     | -     | -    | -    | 68.96 | 34.99 | 1.37 | 99.50 | 100.00 | -         | 93351.89 |
| 2016 | 82.34 | 71.75 | 10.59 | 34377.93 | -       | -    | -     | -     | -     | -    | -    | 69.12 | 35.66 | -    | -     | -      | -         | 93483.21 |
| 2017 | 83.17 | 71.87 | 11.30 | -        | -       | -    | -     | -     | -     | -    | -    | -     | -     | -    | -     | -      | -         | -        |

|         |      |       |       |      |         |        |      |       |       |       |      |      |       |       |      |       |       |          |          |
|---------|------|-------|-------|------|---------|--------|------|-------|-------|-------|------|------|-------|-------|------|-------|-------|----------|----------|
| Jamaica | 1995 | 74.19 | 64.84 | 9.36 | 4946.87 | 97.24  | 4.16 | 61.92 | 28.85 | 53.42 | 2.22 | 1.94 | 50.62 | 12.71 | 2.77 | 80.30 | 93.30 | 10886.33 | 90616.48 |
|         | 1996 | 74.07 | 64.74 | 9.33 | 4893.89 | 122.89 | 4.73 | 60.58 | 23.96 | 60.45 | 2.86 | 1.87 | 50.86 | 12.76 | 2.74 | 80.30 | 93.30 | 11247.79 | 90663.83 |
|         | 1997 | 73.94 | 64.63 | 9.31 | 4791.63 | 175.98 | 5.97 | 69.38 | 30.40 | 56.19 | 3.35 | 2.62 | 51.10 | 12.82 | 2.70 | 80.40 | 93.40 | 11457.93 | 90722.20 |
|         | 1998 | 73.91 | 64.59 | 9.32 | 4635.79 | 187.37 | 5.48 | 66.59 | 25.50 | 61.71 | 3.38 | 2.10 | 51.34 | 12.91 | 2.67 | 80.50 | 93.40 | 11874.58 | 90773.98 |
|         | 1999 | 73.89 | 64.54 | 9.34 | 4642.55 | 172.57 | 5.04 | 69.47 | 32.11 | 53.78 | 2.71 | 2.33 | 51.57 | 13.02 | 2.62 | 80.60 | 93.40 | 12168.26 | 90836.49 |
|         | 2000 | 73.82 | 64.48 | 9.34 | 4644.60 | 199.94 | 5.81 | 65.01 | 28.97 | 55.44 | 3.22 | 2.59 | 51.81 | 13.13 | 2.58 | 80.70 | 93.50 | 12364.43 | 90905.18 |
|         | 2001 | 73.64 | 64.33 | 9.30 | 4671.64 | 185.61 | 5.34 | 69.27 | 37.48 | 45.89 | 2.45 | 2.89 | 52.05 | 13.11 | 2.53 | 80.80 | 93.50 | 12249.86 | 90990.16 |
|         | 2002 | 73.92 | 64.56 | 9.36 | 4732.36 | 179.12 | 4.86 | 61.81 | 26.33 | 57.40 | 2.79 | 2.07 | 52.25 | 13.07 | 2.48 | 80.90 | 93.50 | 12392.12 | 91078.97 |
|         | 2003 | 74.12 | 64.72 | 9.40 | 4875.00 | 162.22 | 4.56 | 64.73 | 32.01 | 50.55 | 2.30 | 2.25 | 52.44 | 13.05 | 2.44 | 81.00 | 93.60 | 12959.04 | 91172.66 |
|         | 2004 | 74.33 | 64.87 | 9.46 | 4910.08 | 183.47 | 4.80 | 63.64 | 27.56 | 56.69 | 2.72 | 2.08 | 52.63 | 13.04 | 2.40 | 81.00 | 93.60 | 13419.47 | 91276.30 |
|         | 2005 | 74.66 | 65.12 | 9.55 | 4925.28 | 170.75 | 4.07 | 63.64 | 32.58 | 48.81 | 1.99 | 2.08 | 52.81 | 13.06 | 2.36 | 81.10 | 93.60 | 13314.89 | 91366.37 |
|         | 2006 | 74.83 | 65.29 | 9.53 | 5039.41 | 187.07 | 4.22 | 63.73 | 28.85 | 54.73 | 2.31 | 1.91 | 53.00 | 13.05 | 2.33 | 81.20 | 93.60 | 14549.96 | 91449.10 |
|         | 2007 | 74.73 | 65.22 | 9.50 | 5083.60 | 230.49 | 4.87 | 70.95 | 52.03 | 52.03 | 2.53 | 2.34 | 53.18 | 13.05 | 2.29 | 81.30 | 93.70 | 15423.55 | 91524.91 |
|         | 2008 | 74.65 | 65.17 | 9.48 | 5015.85 | 272.62 | 5.40 | 70.95 | 32.96 | 53.54 | 2.89 | 2.51 | 53.37 | 13.05 | 2.25 | 81.40 | 93.70 | 13912.56 | 91590.92 |
|         | 2009 | 74.59 | 65.13 | 9.46 | 4774.45 | 229.13 | 5.16 | 70.90 | 31.12 | 56.10 | 2.89 | 2.26 | 53.56 | 13.05 | 2.21 | 81.50 | 93.70 | 13884.10 | 91677.66 |
|         | 2010 | 74.65 | 65.17 | 9.48 | 4682.52 | 255.66 | 5.30 | 70.95 | 30.90 | 56.45 | 2.99 | 2.31 | 53.74 | 13.09 | 2.17 | 81.60 | 93.70 | 14581.68 | 91744.36 |
|         | 2011 | 74.75 | 65.24 | 9.51 | 4742.92 | 273.31 | 5.21 | 70.98 | 32.91 | 53.64 | 2.80 | 2.42 | 53.93 | 13.18 | 2.14 | 81.60 | 93.80 | 15053.51 | 91815.80 |
|         | 2012 | 74.80 | 65.27 | 9.53 | 4694.25 | 302.92 | 5.66 | 59.49 | 25.06 | 57.87 | 3.27 | 2.38 | 54.13 | 13.30 | 2.10 | 81.70 | 93.80 | 15474.32 | 91890.06 |

|        |      |       |       |       |          |         |       |       |       |       |      |      |       |       |      |        |        |            |          |
|--------|------|-------|-------|-------|----------|---------|-------|-------|-------|-------|------|------|-------|-------|------|--------|--------|------------|----------|
|        | 2013 | 74.84 | 65.30 | 9.54  | 4699.77  | 305.85  | 5.91  | 58.41 | 24.98 | 57.23 | 3.38 | 2.53 | 54.34 | 13.45 | 2.07 | 81.80  | 93.80  | -          | 91956.45 |
|        | 2014 | 74.87 | 65.32 | 9.55  | 4714.86  | 266.19  | 5.36  | 58.41 | 27.81 | 52.38 | 2.81 | 2.55 | 54.56 | 13.62 | 2.05 | 81.80  | 93.80  | -          | 92028.81 |
|        | 2015 | 74.89 | 65.33 | 9.56  | 4740.64  | -       | -     | -     | -     | -     | -    | -    | 54.79 | 13.84 | 2.03 | 81.80  | 93.80  | -          | 92100.26 |
|        | 2016 | 74.90 | 65.34 | 9.55  | 4790.04  | -       | -     | -     | -     | -     | -    | -    | 55.03 | 14.06 | -    | -      | -      | -          | 92176.20 |
|        | 2017 | 74.66 | 65.60 | 9.06  | -        | -       | -     | -     | -     | -     | -    | -    | -     | -     | -    | -      | -      | -          | -        |
| Japan  | 1995 | 79.75 | 70.03 | 9.72  | 40368.71 | 2844.85 | 6.62  | 79.32 | 14.03 | 82.32 | 5.45 | 1.17 | 78.02 | 20.58 | 1.42 | 100.00 | 100.00 | 1421640.91 | 90189.27 |
|        | 1996 | 80.17 | 70.38 | 9.79  | 41514.86 | 2455.15 | 6.49  | 79.32 | 14.03 | 82.32 | 5.34 | 1.15 | 78.15 | 21.41 | 1.43 | 100.00 | 100.00 | 1424112.70 | 90289.81 |
|        | 1997 | 80.39 | 70.55 | 9.83  | 41861.91 | 2333.37 | 6.73  | 81.23 | 15.17 | 81.33 | 5.47 | 1.26 | 78.27 | 22.26 | 1.39 | 100.00 | 100.00 | 1414397.05 | 90397.96 |
|        | 1998 | 80.55 | 70.68 | 9.87  | 41277.08 | 2195.84 | 7.01  | 80.84 | 15.64 | 80.65 | 5.65 | 1.36 | 78.40 | 23.13 | 1.38 | 100.00 | 100.00 | 1371363.01 | 90514.91 |
|        | 1999 | 80.72 | 70.81 | 9.90  | 41097.96 | 2597.76 | 7.34  | 81.19 | 15.84 | 80.49 | 5.91 | 1.43 | 78.52 | 24.00 | 1.34 | 100.00 | 100.00 | 1399008.94 | 90631.57 |
|        | 2000 | 81.03 | 71.04 | 9.99  | 42169.70 | 2838.60 | 7.53  | 81.33 | 15.61 | 80.81 | 6.09 | 1.45 | 78.65 | 24.89 | 1.36 | 100.00 | 100.00 | 1406194.59 | 90754.25 |
|        | 2001 | 81.31 | 71.26 | 10.06 | 42239.11 | 2531.11 | 7.75  | 82.93 | 15.51 | 81.29 | 6.30 | 1.45 | 79.99 | 25.78 | 1.33 | 100.00 | 100.00 | 1387952.21 | 90866.50 |
|        | 2002 | 81.56 | 71.44 | 10.12 | 42190.78 | 2450.73 | 7.85  | 83.02 | 15.73 | 81.05 | 6.36 | 1.49 | 81.65 | 26.67 | 1.32 | 100.00 | 100.00 | 1422453.19 | 90980.48 |
|        | 2003 | 81.75 | 71.57 | 10.17 | 42743.99 | 2694.43 | 8.00  | 84.28 | 16.61 | 80.30 | 6.42 | 1.58 | 83.20 | 27.58 | 1.29 | 100.00 | 100.00 | 1428102.13 | 91099.81 |
|        | 2004 | 81.93 | 71.71 | 10.22 | 43671.68 | 2927.43 | 8.03  | 84.10 | 16.35 | 80.56 | 6.47 | 1.56 | 84.64 | 28.54 | 1.29 | 100.00 | 100.00 | 1427399.20 | 91225.30 |
|        | 2005 | 82.05 | 71.79 | 10.26 | 44393.66 | 2927.57 | 8.18  | 83.23 | 15.50 | 81.37 | 6.66 | 1.52 | 85.98 | 29.55 | 1.26 | 100.00 | 100.00 | 1439905.16 | 91350.08 |
|        | 2006 | 82.24 | 71.93 | 10.32 | 44995.52 | 2791.22 | 8.19  | 83.45 | 16.27 | 80.50 | 6.60 | 1.60 | 87.06 | 30.51 | 1.32 | 100.00 | 100.00 | 1425898.63 | 91418.07 |
|        | 2007 | 82.41 | 72.05 | 10.37 | 45687.35 | 2806.57 | 8.25  | 82.74 | 81.41 | 81.41 | 6.72 | 1.53 | 88.01 | 31.50 | 1.34 | 100.00 | 100.00 | 1461356.12 | 91482.70 |
|        | 2008 | 82.57 | 72.15 | 10.42 | 45165.89 | 3255.56 | 8.60  | 80.93 | 15.10 | 81.35 | 7.00 | 1.60 | 88.91 | 32.55 | 1.37 | 100.00 | 100.00 | 1385164.84 | 91555.68 |
|        | 2009 | 82.77 | 72.29 | 10.48 | 42724.53 | 3741.59 | 9.51  | 81.04 | 15.00 | 81.50 | 7.75 | 1.76 | 89.74 | 33.72 | 1.37 | 100.00 | 100.00 | 1290243.65 | 91631.11 |
|        | 2010 | 82.91 | 72.37 | 10.54 | 44507.68 | 4110.46 | 9.58  | 80.62 | 14.45 | 82.08 | 7.86 | 1.72 | 90.52 | 35.07 | 1.39 | 100.00 | 100.00 | 1350427.91 | 91715.55 |
|        | 2011 | 82.66 | 72.16 | 10.50 | 44538.71 | 4654.23 | 10.07 | 80.19 | 13.96 | 82.59 | 8.32 | 1.75 | 91.25 | 36.45 | 1.39 | 100.00 | 100.00 | 1396767.26 | 91781.13 |
|        | 2012 | 83.23 | 72.63 | 10.59 | 45276.83 | 4748.92 | 10.17 | 80.22 | 13.88 | 82.70 | 8.41 | 1.76 | 91.90 | 37.97 | 1.41 | 100.00 | 100.00 | 1478858.88 | 91853.62 |
|        | 2013 | 83.44 | 72.80 | 10.64 | 46249.26 | 3960.20 | 10.25 | 82.77 | 13.89 | 83.22 | 8.53 | 1.72 | 92.49 | 39.58 | 1.43 | 100.00 | 100.00 | -          | 91934.97 |
|        | 2014 | 83.69 | 72.98 | 10.71 | 46466.12 | 3702.95 | 10.23 | 84.77 | 13.91 | 83.59 | 8.55 | 1.68 | 93.02 | 41.17 | 1.42 | 100.00 | 100.00 | -          | 92020.33 |
|        | 2015 | 83.83 | 73.08 | 10.74 | 47082.69 | -       | -     | -     | -     | -     | -    | -    | 93.50 | 42.65 | 1.46 | 100.00 | 100.00 | -          | 92120.09 |
|        | 2016 | 83.94 | 73.16 | 10.78 | 47623.27 | -       | -     | -     | -     | -     | -    | -    | 93.93 | 43.91 | -    | -      | -      | -          | 92230.46 |
|        | 2017 | 84.19 | 73.07 | 11.12 | -        | -       | -     | -     | -     | -     | -    | -    | -     | -     | -    | -      | -      | -          | -        |
| Jordan | 1995 | 72.65 | 61.94 | 10.71 | 2678.07  | 131.96  | 8.47  | 64.26 | 23.82 | 62.93 | 5.33 | 3.14 | 78.37 | 5.19  | 4.61 | 97.50  | 96.70  | 15834.06   | 88511.43 |

|      |       |       |       |         |        |      |       |       |       |      |      |       |      |      |       |       |          |          |
|------|-------|-------|-------|---------|--------|------|-------|-------|-------|------|------|-------|------|------|-------|-------|----------|----------|
| 1996 | 72.64 | 61.98 | 10.66 | 2650.81 | 138.76 | 8.91 | 66.86 | 26.03 | 61.07 | 5.44 | 3.47 | 78.66 | 5.22 | 4.47 | 97.60 | 96.70 | 16405.74 | 88478.55 |
| 1997 | 72.76 | 62.10 | 10.67 | 2672.82 | 142.99 | 8.97 | 68.55 | 29.45 | 57.04 | 5.12 | 3.85 | 78.95 | 5.25 | 4.35 | 97.60 | 96.70 | 16830.79 | 88490.89 |
| 1998 | 72.87 | 62.21 | 10.66 | 2699.41 | 159.37 | 9.31 | 69.13 | 29.76 | 56.95 | 5.30 | 4.01 | 79.24 | 5.27 | 4.23 | 97.70 | 96.70 | 17159.42 | 88528.56 |
| 1999 | 72.97 | 62.31 | 10.66 | 2743.03 | 162.58 | 9.36 | 72.42 | 33.80 | 53.33 | 4.99 | 4.37 | 79.53 | 5.30 | 4.13 | 97.80 | 96.80 | 17135.08 | 88587.29 |
| 2000 | 73.05 | 62.41 | 10.64 | 2810.04 | 171.34 | 9.65 | 74.94 | 38.96 | 48.01 | 4.64 | 5.02 | 79.81 | 5.33 | 4.03 | 97.80 | 96.80 | 17799.02 | 88685.45 |
| 2001 | 73.13 | 62.49 | 10.64 | 2906.62 | 183.25 | 9.90 | 74.31 | 38.39 | 48.33 | 4.79 | 5.12 | 80.09 | 5.41 | 3.95 | 97.90 | 96.80 | 17657.35 | 88752.89 |
| 2002 | 73.16 | 62.54 | 10.61 | 3020.09 | 187.84 | 9.68 | 78.25 | 39.37 | 49.69 | 4.81 | 4.87 | 80.36 | 5.49 | 3.88 | 98.00 | 96.80 | 18834.63 | 88821.51 |
| 2003 | 73.06 | 62.51 | 10.55 | 3082.05 | 185.10 | 9.15 | 81.50 | 41.87 | 48.62 | 4.45 | 4.70 | 80.64 | 5.57 | 3.83 | 98.00 | 96.80 | 18728.01 | 88882.79 |
| 2004 | 72.97 | 62.48 | 10.49 | 3262.19 | 199.75 | 9.05 | 84.06 | 40.49 | 51.83 | 4.69 | 4.36 | 80.91 | 5.65 | 3.78 | 98.10 | 96.80 | 20882.01 | 88952.01 |
| 2005 | 73.11 | 62.60 | 10.50 | 3417.73 | 209.68 | 8.88 | 86.27 | 40.03 | 53.60 | 4.76 | 4.12 | 81.18 | 5.73 | 3.75 | 98.20 | 96.80 | 22339.73 | 89011.31 |
| 2006 | 73.77 | 63.12 | 10.65 | 3557.30 | 220.13 | 8.08 | 88.50 | 39.35 | 55.53 | 4.49 | 3.60 | 81.44 | 5.82 | 3.73 | 98.20 | 96.90 | 22823.08 | 89104.27 |
| 2007 | 74.39 | 63.54 | 10.84 | 3687.23 | 247.94 | 8.35 | 89.40 | 59.84 | 59.84 | 4.99 | 3.35 | 81.70 | 5.91 | 3.71 | 98.30 | 96.90 | 23900.58 | 89192.97 |
| 2008 | 74.82 | 63.87 | 10.95 | 3773.19 | 320.87 | 8.78 | 83.58 | 31.86 | 61.88 | 5.43 | 3.35 | 81.96 | 6.00 | 3.69 | 98.30 | 96.90 | 24469.12 | 89277.14 |
| 2009 | 75.29 | 64.21 | 11.08 | 3786.53 | 362.73 | 9.54 | 75.85 | 22.63 | 70.17 | 6.70 | 2.85 | 82.22 | 6.09 | 3.68 | 98.40 | 96.90 | 24315.65 | 89346.80 |
| 2010 | 75.75 | 64.57 | 11.17 | 3679.19 | 341.27 | 8.42 | 73.49 | 21.79 | 70.34 | 5.92 | 2.50 | 82.47 | 6.18 | 3.66 | 98.50 | 96.90 | 25590.05 | 89430.98 |
| 2011 | 76.05 | 64.78 | 11.27 | 3578.77 | 357.76 | 8.39 | 70.20 | 20.76 | 70.42 | 5.91 | 2.48 | 82.72 | 6.18 | 3.64 | 98.50 | 96.90 | 26440.77 | 89461.76 |
| 2012 | 76.30 | 64.98 | 11.32 | 3481.69 | 354.06 | 8.00 | 69.15 | 21.56 | 68.83 | 5.51 | 2.50 | 82.97 | 6.19 | 3.60 | 98.60 | 96.90 | 27198.59 | 89489.87 |
| 2013 | 76.46 | 65.13 | 11.33 | 3401.08 | 336.79 | 7.23 | 68.97 | 22.50 | 67.38 | 4.87 | 2.36 | 83.21 | 6.20 | 3.56 | 98.60 | 96.90 | -        | 89530.54 |
| 2014 | 76.60 | 65.26 | 11.34 | 3348.83 | 358.91 | 7.45 | 68.83 | 20.87 | 69.68 | 5.19 | 2.26 | 83.45 | 6.22 | 3.51 | 98.60 | 96.90 | -        | 89588.66 |
| 2015 | 76.71 | 65.37 | 11.34 | 3297.89 | -      | -    | -     | -     | -     | -    | -    | 83.68 | 6.25 | 3.45 | 98.60 | 96.90 | -        | 89659.48 |
| 2016 | 76.29 | 65.10 | 11.19 | 3258.49 | -      | -    | -     | -     | -     | -    | -    | 83.91 | 6.26 | -    | -     | -     | -        | 89715.45 |
| 2017 | 79.33 | 67.73 | 11.60 | -       | -      | -    | -     | -     | -     | -    | -    | -     | -    | -    | -     | -     | -        | -        |

|            |      |       |       |      |         |       |      |       |       |       |      |      |       |       |      |       |       |           |          |
|------------|------|-------|-------|------|---------|-------|------|-------|-------|-------|------|------|-------|-------|------|-------|-------|-----------|----------|
| Kazakhstan | 1995 | 64.21 | 56.49 | 7.73 | 3738.47 | 48.25 | 4.62 | 98.57 | 35.53 | 63.96 | 2.95 | 1.66 | 55.92 | 11.36 | 2.26 | 96.50 | 94.00 | 247266.95 | 89254.32 |
|            | 1996 | 63.92 | 56.30 | 7.62 | 3814.50 | 58.17 | 4.34 | 98.53 | 35.94 | 63.53 | 2.76 | 1.58 | 55.94 | 11.35 | 2.13 | 96.60 | 94.00 | 272328.50 | 89373.80 |
|            | 1997 | 63.95 | 56.32 | 7.62 | 3941.12 | 66.97 | 4.67 | 98.60 | 35.24 | 64.26 | 3.00 | 1.67 | 55.96 | 11.11 | 2.00 | 96.60 | 93.90 | 207305.66 | 89500.58 |
|            | 1998 | 64.11 | 56.46 | 7.65 | 3933.56 | 70.18 | 4.83 | 98.65 | 35.49 | 64.02 | 3.09 | 1.74 | 55.99 | 10.78 | 1.80 | 96.70 | 93.90 | 218453.24 | 89619.53 |
|            | 1999 | 64.29 | 56.61 | 7.69 | 4078.43 | 49.02 | 4.38 | 98.87 | 46.99 | 52.47 | 2.30 | 2.08 | 55.93 | 10.52 | 1.70 | 96.70 | 93.80 | 182819.10 | 89737.41 |
|            | 2000 | 64.42 | 56.70 | 7.73 | 4491.59 | 50.81 | 4.16 | 98.88 | 48.51 | 50.94 | 2.12 | 2.04 | 55.73 | 10.40 | 1.80 | 96.80 | 93.80 | 207395.42 | 89838.38 |
|            | 2001 | 64.58 | 56.85 | 7.72 | 5106.63 | 51.41 | 3.47 | 98.50 | 42.71 | 56.64 | 1.97 | 1.51 | 55.53 | 10.66 | 1.90 | 96.80 | 93.70 | 223606.92 | 89875.35 |

|       |       |       |       |          |        |       |       |       |       |       |      |       |       |      |       |       |           |          |          |
|-------|-------|-------|-------|----------|--------|-------|-------|-------|-------|-------|------|-------|-------|------|-------|-------|-----------|----------|----------|
| 2002  | 64.71 | 56.96 | 7.75  | 5606.85  | 59.31  | 3.61  | 98.65 | 45.89 | 53.48 | 1.93  | 1.68 | 55.33 | 11.03 | 2.00 | 96.90 | 93.70 | 285884.29 | 89891.95 |          |
| 2003  | 64.76 | 57.01 | 7.75  | 6107.71  | 75.36  | 3.70  | 98.65 | 44.88 | 54.51 | 2.01  | 1.68 | 55.12 | 11.35 | 2.03 | 97.00 | 93.60 | 256799.01 | 89887.53 |          |
| 2004  | 64.73 | 56.99 | 7.73  | 6647.69  | 111.71 | 3.95  | 98.64 | 41.36 | 58.07 | 2.29  | 1.66 | 54.92 | 11.47 | 2.21 | 97.00 | 93.60 | 285197.38 | 89850.45 |          |
| 2005  | 64.75 | 57.00 | 7.75  | 7227.98  | 149.99 | 4.07  | 98.57 | 37.49 | 61.96 | 2.52  | 1.55 | 54.72 | 11.32 | 2.22 | 97.10 | 93.50 | 291641.05 | 89798.32 |          |
| 2006  | 65.05 | 57.25 | 7.80  | 7917.20  | 194.02 | 3.73  | 98.46 | 37.54 | 61.87 | 2.31  | 1.42 | 54.52 | 11.16 | 2.36 | 97.10 | 93.40 | 324812.47 | 89686.24 |          |
| 2007  | 65.75 | 57.83 | 7.92  | 8523.77  | 212.10 | 3.19  | 98.45 | 56.01 | 56.01 | 1.78  | 1.40 | 54.31 | 10.85 | 2.50 | 97.20 | 93.40 | 315840.14 | 89559.46 |          |
| 2008  | 66.70 | 58.57 | 8.13  | 8698.42  | 305.82 | 3.65  | 98.45 | 37.40 | 62.01 | 2.26  | 1.39 | 54.11 | 10.47 | 2.70 | 97.30 | 93.30 | 330512.05 | 89431.51 |          |
| 2009  | 67.61 | 59.28 | 8.33  | 8573.77  | 295.32 | 4.13  | 98.53 | 35.36 | 64.12 | 2.65  | 1.48 | 53.91 | 10.13 | 2.55 | 97.30 | 93.20 | 287801.13 | 89304.99 |          |
| 2010  | 68.34 | 59.86 | 8.48  | 9070.65  | 401.21 | 4.42  | 98.86 | 42.34 | 57.17 | 2.53  | 1.89 | 53.73 | 9.87  | 2.60 | 97.40 | 93.20 | 347356.08 | 89206.10 |          |
| 2011  | 69.01 | 60.40 | 8.61  | 9603.59  | 460.55 | 4.06  | 98.80 | 43.46 | 56.02 | 2.27  | 1.78 | 53.58 | 9.92  | 2.59 | 97.40 | 93.10 | 350475.73 | 89111.74 |          |
| 2012  | 69.71 | 60.97 | 8.74  | 9923.81  | 521.64 | 4.32  | 98.86 | 43.69 | 55.81 | 2.41  | 1.91 | 53.46 | 9.98  | 2.62 | 97.50 | 93.10 | 366502.20 | 89026.16 |          |
| 2013  | 70.50 | 61.61 | 8.89  | 10368.67 | 582.10 | 4.30  | 98.95 | 48.56 | 50.92 | 2.19  | 2.11 | 53.36 | 10.02 | 2.64 | 97.50 | 93.00 | -         | 88937.83 |          |
| 2014  | 71.26 | 62.21 | 9.05  | 10645.46 | 538.78 | 4.36  | 98.90 | 45.14 | 54.36 | 2.37  | 1.99 | 53.29 | 10.06 | 2.74 | 97.50 | 92.90 | -         | 88869.55 |          |
| 2015  | 71.72 | 62.58 | 9.14  | 10616.68 | -      | -     | -     | -     | -     | -     | -    | 53.25 | 10.16 | 2.73 | 97.50 | 92.90 | -         | 88810.71 |          |
| 2016  | 71.75 | 62.67 | 9.08  | 10580.93 | -      | -     | -     | -     | -     | -     | -    | 53.23 | 10.40 | -    | -     | -     | -         | 88776.34 |          |
| 2017  | 71.98 | 62.71 | 9.27  | -        | -      | -     | -     | -     | -     | -     | -    | -     | -     | -    | -     | -     | -         | -        |          |
| Kenya | 1995  | 57.24 | 50.34 | 6.90     | 861.25 | 14.06 | 4.25  | 78.31 | 42.06 | 46.29 | 1.97 | 2.29  | 18.26 | 5.30 | 5.46  | 25.70 | 47.40     | 41798.48 | 89072.72 |
|       | 1996  | 56.53 | 49.75 | 6.78     | 871.43 | 17.77 | 4.15  | 79.09 | 47.38 | 40.09 | 1.66 | 2.49  | 18.58 | 5.29 | 5.40  | 26.00 | 48.30     | 41134.09 | 89123.53 |
|       | 1997  | 55.83 | 49.16 | 6.68     | 851.18 | 18.72 | 4.12  | 79.20 | 48.43 | 38.85 | 1.60 | 2.52  | 18.90 | 5.28 | 5.35  | 26.20 | 49.10     | 41235.59 | 89177.80 |
|       | 1998  | 55.27 | 48.67 | 6.60     | 855.10 | 21.42 | 4.49  | 80.38 | 44.69 | 44.40 | 1.99 | 2.50  | 19.22 | 5.25 | 5.30  | 26.40 | 50.00     | 66595.01 | 89235.12 |
|       | 1999  | 55.25 | 48.63 | 6.63     | 851.07 | 17.86 | 4.20  | 80.43 | 48.38 | 39.85 | 1.67 | 2.52  | 19.55 | 5.21 | 5.24  | 26.70 | 50.90     | 46998.10 | 89295.35 |
|       | 2000  | 55.20 | 48.55 | 6.65     | 833.03 | 19.15 | 4.68  | 80.40 | 43.20 | 46.27 | 2.17 | 2.52  | 19.89 | 5.15 | 5.18  | 26.90 | 51.80     | 46237.25 | 89355.93 |
|       | 2001  | 55.45 | 48.80 | 6.65     | 841.22 | 18.84 | 4.62  | 80.47 | 44.48 | 44.73 | 2.07 | 2.55  | 20.24 | 5.12 | 5.11  | 27.10 | 52.60     | 44415.73 | 89407.77 |
|       | 2002  | 55.67 | 49.02 | 6.64     | 823.09 | 18.25 | 4.54  | 78.27 | 44.76 | 42.82 | 1.94 | 2.60  | 20.59 | 5.06 | 5.04  | 27.40 | 53.50     | 43784.87 | 89465.01 |
|       | 2003  | 56.00 | 49.33 | 6.67     | 824.47 | 19.76 | 4.45  | 79.10 | 44.81 | 43.35 | 1.93 | 2.52  | 20.95 | 5.00 | 4.98  | 27.60 | 54.30     | 46308.66 | 89517.37 |
|       | 2004  | 56.56 | 49.82 | 6.74     | 843.23 | 20.05 | 4.29  | 78.25 | 45.49 | 41.86 | 1.80 | 2.49  | 21.31 | 4.92 | 4.91  | 27.80 | 55.20     | 46544.16 | 89574.30 |
|       | 2005  | 57.43 | 50.56 | 6.87     | 868.92 | 23.13 | 4.36  | 77.37 | 44.65 | 42.29 | 1.85 | 2.52  | 21.68 | 4.84 | 4.84  | 28.00 | 56.00     | 48661.63 | 89631.47 |
|       | 2006  | 58.47 | 51.50 | 6.98     | 900.10 | 30.20 | 4.24  | 75.20 | 46.42 | 38.28 | 1.62 | 2.62  | 22.05 | 4.77 | 4.76  | 28.30 | 56.80     | 50017.92 | 89661.12 |
|       | 2007  | 59.61 | 52.49 | 7.13     | 935.66 | 34.99 | 4.08  | 77.96 | 39.16 | 39.16 | 1.60 | 2.48  | 22.42 | 4.71 | 4.68  | 28.50 | 57.70     | 53054.24 | 89692.72 |

|      |       |       |      |         |       |      |       |       |       |      |      |       |      |      |       |       |          |          |
|------|-------|-------|------|---------|-------|------|-------|-------|-------|------|------|-------|------|------|-------|-------|----------|----------|
| 2008 | 60.65 | 53.38 | 7.26 | 912.38  | 36.60 | 3.90 | 77.97 | 49.91 | 35.99 | 1.40 | 2.50 | 22.80 | 4.64 | 4.58 | 28.70 | 58.50 | 53277.03 | 89730.42 |
| 2009 | 61.68 | 54.26 | 7.42 | 917.04  | 39.29 | 4.17 | 78.00 | 47.28 | 39.39 | 1.64 | 2.53 | 23.18 | 4.58 | 4.48 | 29.00 | 59.30 | 52547.68 | 89775.97 |
| 2010 | 62.76 | 55.15 | 7.60 | 967.34  | 39.41 | 3.97 | 78.03 | 50.17 | 35.70 | 1.42 | 2.55 | 23.57 | 4.54 | 4.37 | 29.20 | 60.00 | 52675.10 | 89823.37 |
| 2011 | 63.75 | 56.00 | 7.75 | 999.00  | 52.99 | 5.23 | 78.08 | 38.92 | 50.15 | 2.62 | 2.61 | 23.97 | 4.53 | 4.27 | 29.40 | 60.80 | 53513.99 | 89763.22 |
| 2012 | 64.55 | 56.69 | 7.86 | 1016.83 | 65.06 | 5.49 | 67.28 | 26.56 | 60.52 | 3.32 | 2.17 | 24.37 | 4.53 | 4.17 | 29.60 | 61.60 | 54302.10 | 89714.36 |
| 2013 | 65.16 | 57.20 | 7.95 | 1048.27 | 70.00 | 5.57 | 67.38 | 26.89 | 60.10 | 3.35 | 2.22 | 24.78 | 4.54 | 4.07 | 29.90 | 62.30 | -        | 89677.75 |
| 2014 | 65.74 | 57.69 | 8.05 | 1075.64 | 77.70 | 5.72 | 67.37 | 26.11 | 61.25 | 3.50 | 2.22 | 25.20 | 4.57 | 3.99 | 30.10 | 63.10 | -        | 89648.92 |
| 2015 | 66.30 | 58.15 | 8.16 | 1107.92 | -     | -    | -     | -     | -     | -    | -    | 25.62 | 4.60 | 3.92 | 30.10 | 63.20 | -        | 89632.38 |
| 2016 | 66.84 | 58.59 | 8.25 | 1143.07 | -     | -    | -     | -     | -     | -    | -    | 26.06 | 4.66 | -    | -     | -     | -        | 89613.87 |
| 2017 | 65.86 | 57.62 | 8.23 | -       | -     | -    | -     | -     | -     | -    | -    | -     | -    | -    | -     | -     | -        | -        |

|          |      |       |       |      |         |        |       |      |       |       |       |      |       |      |      |       |       |       |          |
|----------|------|-------|-------|------|---------|--------|-------|------|-------|-------|-------|------|-------|------|------|-------|-------|-------|----------|
| Kiribati | 1995 | 58.54 | 51.36 | 7.18 | 1630.71 | 69.60  | 9.39  | 2.57 | 0.12  | 95.50 | 8.97  | 0.42 | 36.41 | 6.27 | 4.37 | 30.50 | 53.30 | 40.16 | 85795.29 |
|          | 1996 | 58.87 | 51.64 | 7.23 | 1633.62 | 79.16  | 9.20  | 2.57 | 0.11  | 95.59 | 8.80  | 0.41 | 37.39 | 6.25 | 4.30 | 31.20 | 54.30 | 42.23 | 85905.42 |
|          | 1997 | 59.05 | 51.78 | 7.27 | 1634.39 | 80.69  | 9.36  | 2.57 | 0.10  | 96.00 | 8.98  | 0.37 | 38.75 | 6.19 | 4.24 | 32.00 | 55.40 | 43.72 | 86024.85 |
|          | 1998 | 59.16 | 51.87 | 7.29 | 1712.39 | 57.55  | 7.00  | 2.57 | 0.12  | 95.17 | 6.66  | 0.34 | 40.14 | 6.11 | 4.17 | 32.70 | 56.60 | 39.11 | 86143.29 |
|          | 1999 | 59.24 | 51.93 | 7.32 | 1657.27 | 75.03  | 8.82  | 2.57 | 0.11  | 95.77 | 8.44  | 0.37 | 41.54 | 5.99 | 4.11 | 33.50 | 57.70 | 40.42 | 86280.37 |
|          | 2000 | 59.37 | 52.01 | 7.36 | 1730.81 | 64.96  | 8.12  | 2.57 | 0.17  | 93.36 | 7.58  | 0.54 | 42.96 | 5.85 | 4.06 | 34.20 | 58.90 | 42.70 | 86428.00 |
|          | 2001 | 59.59 | 52.19 | 7.40 | 1676.52 | 66.17  | 9.00  | 2.57 | 0.15  | 94.32 | 8.49  | 0.51 | 43.47 | 5.94 | 4.02 | 34.80 | 59.70 | 43.93 | 86546.56 |
|          | 2002 | 59.71 | 52.28 | 7.43 | 1710.43 | 75.31  | 9.10  | 2.57 | 0.15  | 94.08 | 8.56  | 0.54 | 43.49 | 6.02 | 3.98 | 35.20 | 60.30 | 44.79 | 86677.57 |
|          | 2003 | 59.84 | 52.38 | 7.46 | 1714.29 | 101.20 | 9.98  | 2.57 | 0.13  | 94.87 | 9.47  | 0.51 | 43.51 | 6.04 | 3.95 | 35.70 | 61.00 | 44.64 | 86804.58 |
|          | 2004 | 59.96 | 52.46 | 7.49 | 1655.68 | 117.32 | 10.39 | 2.57 | 0.12  | 95.19 | 9.89  | 0.50 | 43.53 | 6.01 | 3.93 | 36.10 | 61.60 | 46.23 | 86932.48 |
|          | 2005 | 60.09 | 52.56 | 7.53 | 1704.11 | 115.64 | 10.06 | 2.57 | 0.15  | 94.05 | 9.46  | 0.60 | 43.55 | 5.96 | 3.91 | 36.50 | 62.20 | -     | 87021.34 |
|          | 2006 | 60.18 | 52.65 | 7.53 | 1642.73 | 121.34 | 10.93 | 0.85 | 0.12  | 85.66 | 9.36  | 1.57 | 43.57 | 5.93 | 3.90 | 37.00 | 62.90 | -     | 87177.88 |
|          | 2007 | 60.31 | 52.77 | 7.54 | 1643.16 | 174.44 | 13.66 | 0.55 | 83.47 | 83.47 | 11.40 | 2.26 | 43.60 | 5.93 | 3.88 | 37.40 | 63.50 | 51.38 | 87297.84 |
|          | 2008 | 60.44 | 52.88 | 7.55 | 1577.92 | 167.77 | 12.23 | 0.61 | 0.10  | 84.32 | 10.31 | 1.92 | 43.65 | 5.92 | 3.87 | 37.90 | 64.10 | -     | 87441.05 |
|          | 2009 | 60.55 | 52.99 | 7.57 | 1549.00 | 154.75 | 12.24 | 0.64 | 0.10  | 84.67 | 10.36 | 1.88 | 43.70 | 5.91 | 3.86 | 38.30 | 64.80 | 52.70 | 87588.89 |
|          | 2010 | 60.66 | 53.08 | 7.57 | 1493.16 | 154.16 | 10.52 | 0.55 | 0.09  | 82.95 | 8.73  | 1.79 | 43.77 | 5.88 | 3.84 | 38.80 | 65.40 | -     | 87741.60 |
|          | 2011 | 60.75 | 53.16 | 7.59 | 1471.55 | 171.54 | 10.42 | 0.55 | 0.10  | 82.22 | 8.57  | 1.85 | 43.86 | 5.91 | 3.82 | 39.20 | 66.10 | -     | 87864.13 |
|          | 2012 | 60.92 | 53.31 | 7.61 | 1519.48 | 170.27 | 10.37 | 0.55 | 0.11  | 80.13 | 8.31  | 2.06 | 43.95 | 5.90 | 3.80 | 39.70 | 66.70 | -     | 88022.81 |
|          | 2013 | 61.12 | 53.47 | 7.65 | 1578.88 | 158.06 | 10.15 | 0.55 | 0.10  | 81.07 | 8.23  | 1.92 | 44.06 | 5.92 | 3.77 | 39.70 | 66.80 | -     | 88159.66 |

|            |      |       |       |       |          |         |       |       |       |       |      |      |       |      |      |        |       |          |          |
|------------|------|-------|-------|-------|----------|---------|-------|-------|-------|-------|------|------|-------|------|------|--------|-------|----------|----------|
|            | 2014 | 61.32 | 53.64 | 7.68  | 1565.24  | 154.17  | 10.21 | 0.55  | 0.10  | 81.18 | 8.29 | 1.92 | 44.17 | 5.96 | 3.73 | 39.70  | 66.80 | -        | 88268.98 |
|            | 2015 | 61.55 | 53.83 | 7.72  | 1696.47  | -       | -     | -     | -     | -     | -    | -    | 44.30 | 6.04 | 3.69 | 39.70  | 66.90 | -        | 88388.52 |
|            | 2016 | 61.79 | 54.02 | 7.77  | 1685.99  | -       | -     | -     | -     | -     | -    | -    | 44.45 | 6.19 | -    | -      | -     | -        | 88523.32 |
|            | 2017 | 62.41 | 53.97 | 8.45  | -        | -       | -     | -     | -     | -     | -    | -    | -     | -    | -    | -      | -     | -        | -        |
| Kuwait     | 1995 | 76.10 | 65.43 | 10.67 | 41473.33 | 618.51  | 3.72  | 93.80 | 16.24 | 82.68 | 3.08 | 0.64 | 98.04 | 2.00 | 2.72 | 100.00 | 99.00 | 57167.73 | 86580.24 |
|            | 1996 | 75.76 | 65.19 | 10.57 | 41185.04 | 666.27  | 3.47  | 93.80 | 19.28 | 79.45 | 2.75 | 0.71 | 98.06 | 1.98 | 2.80 | 100.00 | 99.00 | 56837.80 | 86562.15 |
|            | 1997 | 75.57 | 65.04 | 10.53 | 40147.42 | 664.98  | 3.69  | 93.80 | 18.87 | 79.88 | 2.95 | 0.74 | 98.07 | 2.01 | 2.86 | 100.00 | 99.00 | 59684.91 | 86737.91 |
|            | 1998 | 75.67 | 65.11 | 10.56 | 38874.51 | 651.79  | 4.44  | 93.80 | 19.70 | 79.00 | 3.51 | 0.93 | 98.09 | 2.07 | 2.90 | 100.00 | 99.00 | 63941.67 | 87021.22 |
|            | 1999 | 76.15 | 65.48 | 10.67 | 35824.14 | 596.04  | 3.67  | 93.16 | 19.18 | 79.41 | 2.91 | 0.75 | 98.10 | 2.15 | 2.89 | 100.00 | 99.00 | 65097.15 | 87326.33 |
|            | 2000 | 76.44 | 65.68 | 10.75 | 35792.71 | 490.55  | 2.51  | 93.16 | 22.35 | 76.01 | 1.91 | 0.60 | 98.11 | 2.25 | 2.85 | 100.00 | 99.00 | 65239.57 | 87613.67 |
|            | 2001 | 76.47 | 65.68 | 10.79 | 35051.80 | 632.85  | 3.61  | 93.16 | 17.32 | 81.41 | 2.94 | 0.67 | 98.13 | 2.37 | 2.77 | 100.00 | 99.00 | 63455.72 | 87750.05 |
|            | 2002 | 76.91 | 66.02 | 10.89 | 35522.73 | 665.50  | 3.56  | 93.16 | 18.79 | 79.83 | 2.85 | 0.72 | 98.14 | 2.52 | 2.69 | 100.00 | 99.00 | 62755.27 | 87846.77 |
|            | 2003 | 77.18 | 66.23 | 10.95 | 41189.46 | 737.54  | 3.23  | 90.54 | 17.87 | 80.26 | 2.59 | 0.64 | 98.16 | 2.68 | 2.62 | 100.00 | 99.00 | 74340.53 | 87897.31 |
|            | 2004 | 77.11 | 66.16 | 10.94 | 44820.20 | 756.08  | 2.76  | 90.54 | 18.34 | 79.75 | 2.20 | 0.56 | 98.17 | 2.85 | 2.55 | 100.00 | 99.00 | 82089.05 | 87944.80 |
|            | 2005 | 77.07 | 66.13 | 10.94 | 47847.82 | 848.79  | 2.38  | 90.54 | 18.26 | 79.84 | 1.90 | 0.48 | 98.19 | 3.00 | 2.50 | 100.00 | 99.00 | 91416.66 | 88022.50 |
|            | 2006 | 77.09 | 66.15 | 10.94 | 49268.26 | 957.25  | 2.25  | 90.54 | 17.13 | 81.08 | 1.83 | 0.43 | 98.20 | 2.95 | 2.45 | 100.00 | 99.00 | 87101.27 | 88191.81 |
|            | 2007 | 77.19 | 66.22 | 10.98 | 49588.76 | 963.14  | 2.13  | 90.54 | 78.72 | 78.72 | 1.68 | 0.45 | 98.22 | 2.88 | 2.40 | 100.00 | 99.00 | 86228.46 | 88378.37 |
|            | 2008 | 77.25 | 66.25 | 11.00 | 47965.01 | 1052.24 | 1.93  | 90.54 | 19.67 | 78.27 | 1.51 | 0.42 | 98.23 | 2.80 | 2.34 | 100.00 | 99.00 | 89301.44 | 88600.07 |
|            | 2009 | 77.51 | 66.42 | 11.09 | 41936.82 | 1423.52 | 3.87  | 90.54 | 11.69 | 87.09 | 3.37 | 0.50 | 98.25 | 2.73 | 2.28 | 100.00 | 99.00 | 88824.88 | 88822.92 |
|            | 2010 | 78.22 | 66.95 | 11.27 | 38497.62 | 1041.03 | 2.76  | 90.54 | 13.95 | 84.59 | 2.33 | 0.43 | 98.26 | 2.67 | 2.22 | 100.00 | 99.00 | 93785.57 | 89053.51 |
|            | 2011 | 78.90 | 67.47 | 11.43 | 39652.17 | 1244.30 | 2.62  | 90.54 | 12.49 | 86.21 | 2.26 | 0.36 | 98.28 | 2.64 | 2.15 | 100.00 | 99.00 | 96788.19 | 89172.54 |
|            | 2012 | 79.34 | 67.82 | 11.52 | 39733.29 | 1309.07 | 2.57  | 90.54 | 13.55 | 85.04 | 2.19 | 0.38 | 98.29 | 2.62 | 2.09 | 100.00 | 99.00 | -        | 89310.89 |
|            | 2013 | 79.74 | 68.13 | 11.61 | 37924.47 | 1252.53 | 2.56  | 90.54 | 13.95 | 84.59 | 2.17 | 0.39 | 98.31 | 2.61 | 2.05 | 100.00 | 99.00 | -        | 89457.26 |
|            | 2014 | 79.86 | 68.26 | 11.61 | 36259.39 | 1385.78 | 3.04  | 90.54 | 12.74 | 85.93 | 2.61 | 0.43 | 98.33 | 2.63 | 2.01 | 100.00 | 99.00 | -        | 89614.29 |
|            | 2015 | 79.78 | 68.24 | 11.54 | 35053.59 | -       | -     | -     | -     | -     | -    | -    | 98.34 | 2.68 | 1.99 | 100.00 | 99.00 | -        | 89783.12 |
|            | 2016 | 79.70 | 68.24 | 11.46 | 35250.91 | -       | -     | -     | -     | -     | -    | -    | 98.36 | 2.86 | -    | -      | -     | -        | 89878.11 |
|            | 2017 | 83.12 | 70.75 | 12.38 | -        | -       | -     | -     | -     | -     | -    | -    | -     | -    | -    | -      | -     | -        | -        |
| Kyrgyzstan | 1995 | 64.01 | 56.31 | 7.70  | 535.04   | 19.40   | 5.97  | 92.58 | 45.15 | 51.23 | 3.06 | 2.91 | 36.35 | 9.62 | 3.10 | 91.30  | 75.00 | 10488.68 | 88902.23 |
|            | 1996 | 64.60 | 56.82 | 7.78  | 564.53   | 22.33   | 5.69  | 93.16 | 51.95 | 44.23 | 2.52 | 3.17 | 36.07 | 9.65 | 2.80 | 91.40  | 75.60 | 12527.74 | 89080.69 |

|      |       |       |       |         |        |       |       |       |       |       |      |       |       |      |       |       |          |           |          |
|------|-------|-------|-------|---------|--------|-------|-------|-------|-------|-------|------|-------|-------|------|-------|-------|----------|-----------|----------|
| 1997 | 65.28 | 57.38 | 7.91  | 611.52  | 19.54  | 5.23  | 92.78 | 47.37 | 48.95 | 2.56  | 2.67 | 35.79 | 9.57  | 2.60 | 91.50 | 76.30 | 11417.86 | 89276.28  |          |
| 1998 | 65.76 | 57.76 | 7.99  | 614.99  | 20.01  | 5.88  | 96.46 | 54.82 | 43.17 | 2.54  | 3.34 | 35.50 | 9.42  | 2.70 | 91.60 | 77.00 | 11119.91 | 89488.19  |          |
| 1999 | 66.12 | 58.07 | 8.06  | 628.07  | 13.63  | 5.34  | 89.09 | 51.51 | 42.19 | 2.25  | 3.09 | 35.30 | 9.31  | 2.60 | 91.70 | 77.70 | 9840.12  | 89687.96  |          |
| 2000 | 66.32 | 58.22 | 8.10  | 654.31  | 12.91  | 4.68  | 89.29 | 49.76 | 44.28 | 2.07  | 2.61 | 35.30 | 9.25  | 2.40 | 91.80 | 78.40 | 9973.96  | 89871.89  |          |
| 2001 | 66.54 | 58.45 | 8.10  | 682.62  | 14.61  | 4.79  | 90.57 | 53.31 | 41.14 | 1.97  | 2.82 | 35.30 | 9.30  | 2.40 | 91.90 | 79.20 | 8996.75  | 89967.55  |          |
| 2002 | 66.49 | 58.45 | 8.04  | 676.27  | 17.37  | 5.43  | 91.05 | 55.04 | 39.55 | 2.15  | 3.28 | 35.30 | 9.36  | 2.40 | 92.00 | 80.00 | 10365.59 | 90053.95  |          |
| 2003 | 66.47 | 58.48 | 7.99  | 716.26  | 20.63  | 5.43  | 92.95 | 57.73 | 37.89 | 2.06  | 3.37 | 35.29 | 9.37  | 2.50 | 92.10 | 80.70 | 10992.91 | 90128.18  |          |
| 2004 | 66.56 | 58.60 | 7.96  | 757.37  | 24.38  | 5.57  | 94.33 | 55.82 | 40.83 | 2.28  | 3.30 | 35.29 | 9.22  | 2.60 | 92.20 | 81.50 | 11243.60 | 90172.19  |          |
| 2005 | 66.49 | 58.59 | 7.90  | 747.57  | 27.99  | 5.82  | 94.72 | 55.99 | 40.89 | 2.38  | 3.44 | 35.29 | 8.90  | 2.50 | 92.30 | 82.30 | 10852.47 | 90215.09  |          |
| 2006 | 66.50 | 58.62 | 7.88  | 762.52  | 37.05  | 6.73  | 93.76 | 48.14 | 48.66 | 3.28  | 3.46 | 35.29 | 8.56  | 2.70 | 92.40 | 83.00 | 10680.91 | 90170.82  |          |
| 2007 | 66.79 | 58.87 | 7.92  | 819.81  | 50.10  | 6.87  | 92.70 | 51.36 | 51.36 | 3.53  | 3.34 | 35.29 | 8.12  | 2.70 | 92.50 | 83.80 | 11464.26 | 90110.46  |          |
| 2008 | 67.27 | 59.26 | 8.01  | 880.28  | 58.61  | 6.07  | 87.18 | 42.26 | 51.53 | 3.13  | 2.94 | 35.29 | 7.66  | 2.80 | 92.60 | 84.60 | 11873.26 | 90014.18  |          |
| 2009 | 67.95 | 59.80 | 8.15  | 894.82  | 59.02  | 6.79  | 88.46 | 39.18 | 55.71 | 3.79  | 3.01 | 35.28 | 7.25  | 2.90 | 92.70 | 85.30 | 13218.81 | 89900.53  |          |
| 2010 | 68.37 | 60.12 | 8.25  | 880.04  | 58.28  | 6.66  | 87.33 | 38.66 | 55.73 | 3.71  | 2.95 | 35.30 | 6.90  | 3.10 | 92.80 | 86.10 | 13008.54 | 89785.20  |          |
| 2011 | 69.04 | 60.65 | 8.38  | 921.18  | 69.08  | 6.18  | 86.00 | 34.49 | 59.89 | 3.70  | 2.48 | 35.34 | 6.79  | 3.10 | 92.90 | 86.90 | 13853.67 | 89675.00  |          |
| 2012 | 69.51 | 61.03 | 8.48  | 905.17  | 81.66  | 6.97  | 88.47 | 35.22 | 60.19 | 4.20  | 2.78 | 35.40 | 6.70  | 3.20 | 93.00 | 87.60 | 13794.74 | 89568.33  |          |
| 2013 | 70.08 | 61.48 | 8.60  | 984.24  | 85.26  | 6.68  | 89.09 | 37.33 | 58.09 | 3.88  | 2.80 | 35.48 | 6.63  | 3.10 | 93.10 | 88.40 | -        | 89482.05  |          |
| 2014 | 70.64 | 61.92 | 8.71  | 1003.51 | 81.57  | 6.48  | 89.82 | 39.40 | 56.13 | 3.64  | 2.84 | 35.59 | 6.59  | 3.20 | 93.20 | 89.20 | -        | 89431.22  |          |
| 2015 | 71.07 | 62.27 | 8.79  | 1021.16 | -      | -     | -     | -     | -     | -     | -    | 35.71 | 6.62  | 3.20 | 93.30 | 90.00 | -        | 89396.52  |          |
| 2016 | 71.24 | 62.45 | 8.78  | 1038.31 | -      | -     | -     | -     | -     | -     | -    | 35.85 | 6.79  | -    | -     | -     | -        | 89390.10  |          |
| 2017 | 72.71 | 63.45 | 9.27  | -       | -      | -     | -     | -     | -     | -     | -    | -     | -     | -    | -     | -     | -        | -         |          |
| Laos | 1995  | 54.50 | 47.90 | 6.59    | 547.36 | 14.37 | 3.77  | 88.97 | 37.55 | 57.80 | 2.18 | 1.59  | 17.38 | 6.78 | 5.39  | 20.40 | 39.90    | 31879.68  | 87134.78 |
|      | 1996  | 54.98 | 48.36 | 6.62    | 572.86 | 14.53 | 3.67  | 91.02 | 45.67 | 49.82 | 1.83 | 1.84  | 18.23 | 6.81 | 5.17  | 20.80 | 40.20    | 24691.47  | 87074.37 |
|      | 1997  | 55.50 | 48.82 | 6.68    | 600.19 | 16.67 | 4.61  | 90.54 | 49.83 | 44.97 | 2.07 | 2.54  | 19.12 | 6.82 | 4.94  | 21.30 | 40.50    | 24955.41  | 87037.94 |
|      | 1998  | 55.94 | 49.21 | 6.73    | 612.59 | 13.66 | 5.43  | 90.54 | 59.66 | 34.11 | 1.85 | 3.58  | 20.04 | 6.81 | 4.72  | 21.80 | 40.80    | 141736.46 | 87033.32 |
|      | 1999  | 56.51 | 49.71 | 6.80    | 646.00 | 10.08 | 3.77  | 91.81 | 64.75 | 29.47 | 1.11 | 2.66  | 20.99 | 6.78 | 4.51  | 24.90 | 43.20    | 143278.75 | 87025.18 |
|      | 2000  | 57.03 | 50.14 | 6.89    | 672.17 | 10.46 | 3.41  | 91.81 | 61.39 | 33.14 | 1.13 | 2.28  | 21.98 | 6.74 | 4.31  | 28.00 | 45.50    | 24667.95  | 87049.25 |
|      | 2001  | 57.53 | 50.62 | 6.91    | 699.63 | 13.21 | 4.32  | 67.41 | 49.03 | 27.27 | 1.18 | 3.14  | 22.99 | 6.73 | 4.14  | 31.10 | 47.80    | 15958.36  | 87150.61 |
|      | 2002  | 58.34 | 51.31 | 7.03    | 729.89 | 12.91 | 4.04  | 69.16 | 50.62 | 26.80 | 1.08 | 2.96  | 24.04 | 6.71 | 3.98  | 34.20 | 50.10    | 34783.70  | 87246.44 |

|        |       |       |       |         |          |         |       |        |       |       |      |       |       |       |       |       |           |          |          |
|--------|-------|-------|-------|---------|----------|---------|-------|--------|-------|-------|------|-------|-------|-------|-------|-------|-----------|----------|----------|
| 2003   | 59.00 | 51.87 | 7.13  | 762.75  | 17.73    | 4.91    | 74.85 | 55.48  | 25.88 | 1.27  | 3.64 | 25.13 | 6.67  | 3.85  | 37.30 | 52.30 | 20412.98  | 87363.37 |          |
| 2004   | 59.68 | 52.46 | 7.23  | 799.07  | 19.08    | 4.54    | 74.82 | 61.62  | 17.65 | 0.80  | 3.74 | 26.24 | 6.61  | 3.72  | 40.30 | 54.60 | 76333.64  | 87497.65 |          |
| 2005   | 60.27 | 52.96 | 7.32  | 842.57  | 20.41    | 4.32    | 75.15 | 62.36  | 17.02 | 0.73  | 3.58 | 27.39 | 6.53  | 3.62  | 43.40 | 56.80 | 53444.81  | 87618.84 |          |
| 2006   | 60.92 | 53.55 | 7.37  | 900.28  | 25.13    | 4.14    | 75.15 | 54.35  | 27.68 | 1.15  | 3.00 | 28.54 | 6.46  | 3.52  | 46.50 | 59.00 | 25073.37  | 87624.75 |          |
| 2007   | 61.66 | 54.21 | 7.45  | 952.32  | 29.40    | 4.14    | 75.15 | 24.85  | 24.85 | 1.03  | 3.11 | 29.69 | 6.38  | 3.42  | 49.60 | 61.20 | 70977.96  | 87627.04 |          |
| 2008   | 62.34 | 54.81 | 7.52  | 1009.46 | 24.22    | 2.77    | 55.19 | 35.24  | 36.15 | 1.00  | 1.77 | 30.84 | 6.30  | 3.33  | 52.60 | 63.30 | 21335.61  | 87601.95 |          |
| 2009   | 63.05 | 55.43 | 7.62  | 1067.58 | 34.22    | 3.77    | 59.44 | 30.15  | 49.28 | 1.86  | 1.91 | 31.99 | 6.22  | 3.24  | 55.70 | 65.40 | 24469.64  | 87568.10 |          |
| 2010   | 63.79 | 56.08 | 7.71  | 1141.13 | 30.02    | 2.75    | 78.25 | 41.82  | 46.55 | 1.28  | 1.47 | 33.12 | 6.15  | 3.15  | 58.70 | 67.50 | 38034.96  | 87541.41 |          |
| 2011   | 64.55 | 56.72 | 7.83  | 1215.88 | 27.81    | 2.20    | 83.57 | 51.77  | 38.05 | 0.84  | 1.36 | 34.25 | 6.14  | 3.06  | 61.70 | 69.50 | 161456.98 | 87395.16 |          |
| 2012   | 65.16 | 57.25 | 7.91  | 1296.75 | 30.76    | 2.12    | 83.82 | 52.48  | 37.39 | 0.79  | 1.33 | 35.37 | 6.14  | 2.97  | 64.60 | 71.50 | 161718.74 | 87246.34 |          |
| 2013   | 65.70 | 57.72 | 7.97  | 1383.70 | 32.70    | 2.00    | 78.80 | 40.78  | 48.25 | 0.96  | 1.03 | 36.47 | 6.15  | 2.90  | 67.60 | 73.50 | -         | 87098.64 |          |
| 2014   | 66.27 | 58.21 | 8.06  | 1470.50 | 32.57    | 1.87    | 78.80 | 38.98  | 50.53 | 0.94  | 0.92 | 37.55 | 6.18  | 2.82  | 70.50 | 75.50 | -         | 86955.68 |          |
| 2015   | 66.77 | 58.64 | 8.13  | 1556.67 | -        | -       | -     | -      | -     | -     | -    | 38.61 | 6.23  | 2.76  | 70.90 | 75.70 | -         | 86834.43 |          |
| 2016   | 67.25 | 59.08 | 8.17  | 1642.73 | -        | -       | -     | -      | -     | -     | -    | 39.65 | 6.30  | -     | -     | -     | -         | 86712.15 |          |
| 2017   | 67.58 | 59.48 | 8.11  | -       | -        | -       | -     | -      | -     | -     | -    | -     | -     | -     | -     | -     | -         | -        |          |
| Latvia | 1995  | 66.43 | 58.04 | 8.39    | 5140.53  | 114.73  | 5.76  | 100.00 | 33.73 | 66.27 | 3.82 | 1.94  | 68.75 | 20.94 | 1.25  | -     | 98.30     | 18783.00 | 91773.11 |
|        | 1996  | 68.52 | 59.72 | 8.81    | 5321.40  | 139.97  | 6.10  | 98.23  | 41.49 | 57.77 | 3.53 | 2.58  | 68.65 | 21.38 | 1.16  | -     | 98.30     | 18788.76 | 91990.87 |
|        | 1997  | 69.25 | 60.31 | 8.94    | 5857.04  | 159.21  | 6.20  | 97.93  | 43.31 | 55.77 | 3.46 | 2.74  | 68.60 | 21.68 | 1.11  | 81.80 | 98.30     | 18051.45 | 92204.94 |
|        | 1998  | 68.99 | 60.14 | 8.85    | 6298.13  | 175.30  | 6.12  | 97.22  | 39.63 | 59.24 | 3.63 | 2.50  | 68.45 | 21.89 | 1.09  | 81.80 | 98.30     | 12905.80 | 92390.96 |
|        | 1999  | 69.96 | 60.92 | 9.04    | 6515.89  | 194.71  | 6.39  | 97.20  | 40.48 | 58.35 | 3.73 | 2.66  | 68.22 | 22.09 | 1.16  | 81.80 | 98.30     | 12076.29 | 92558.44 |
|        | 2000  | 70.50 | 61.37 | 9.13    | 6934.72  | 196.41  | 6.00  | 96.78  | 44.14 | 54.39 | 3.27 | 2.74  | 68.07 | 22.32 | 1.25  | 81.70 | 98.30     | 11507.81 | 92711.27 |
|        | 2001  | 69.92 | 60.96 | 8.96    | 7478.76  | 216.32  | 6.17  | 95.28  | 46.49 | 51.21 | 3.16 | 3.01  | 67.95 | 22.85 | 1.22  | 81.70 | 98.30     | 12089.66 | 92723.05 |
|        | 2002  | 70.27 | 61.27 | 9.01    | 8103.59  | 251.62  | 6.29  | 94.37  | 45.17 | 52.14 | 3.28 | 3.01  | 67.85 | 23.38 | 1.26  | 82.10 | 98.30     | 13748.35 | 92745.78 |
|        | 2003  | 70.68 | 61.63 | 9.06    | 8872.10  | 300.98  | 6.15  | 96.80  | 45.67 | 52.82 | 3.25 | 2.90  | 67.80 | 23.88 | 1.32  | 82.60 | 98.40     | 12783.26 | 92756.61 |
|        | 2004  | 71.03 | 61.94 | 9.10    | 9717.11  | 396.98  | 6.51  | 93.68  | 40.67 | 56.58 | 3.68 | 2.83  | 67.90 | 24.30 | 1.29  | 83.00 | 98.50     | 13021.82 | 92757.14 |
|        | 2005  | 70.83 | 61.84 | 8.99    | 10873.41 | 455.84  | 6.37  | 94.78  | 40.70 | 57.06 | 3.64 | 2.74  | 68.00 | 24.62 | 1.39  | 83.50 | 98.60     | 13288.20 | 92753.77 |
|        | 2006  | 70.49 | 61.59 | 8.90    | 12278.31 | 612.62  | 6.80  | 92.72  | 33.29 | 64.09 | 4.36 | 2.44  | 67.97 | 25.18 | 1.46  | 83.90 | 98.60     | 14054.37 | 92707.09 |
|        | 2007  | 70.93 | 61.87 | 9.06    | 13614.26 | 915.23  | 7.01  | 95.09  | 60.69 | 60.69 | 4.26 | 2.75  | 67.90 | 25.66 | 1.54  | 84.30 | 98.70     | 14416.14 | 92656.32 |
|        | 2008  | 71.99 | 62.67 | 9.32    | 13270.00 | 1018.76 | 6.63  | 94.52  | 35.32 | 62.21 | 4.12 | 2.48  | 67.83 | 26.09 | 1.58  | 84.80 | 98.80     | 14204.67 | 92620.54 |

|      |       |       |       |          |        |      |       |       |       |      |      |       |       |      |       |       |          |          |
|------|-------|-------|-------|----------|--------|------|-------|-------|-------|------|------|-------|-------|------|-------|-------|----------|----------|
| 2009 | 72.77 | 63.25 | 9.52  | 11547.99 | 817.20 | 6.84 | 97.32 | 36.06 | 59.51 | 4.07 | 2.53 | 67.76 | 26.48 | 1.46 | 85.20 | 98.90 | 13580.32 | 92623.42 |
| 2010 | 73.23 | 63.65 | 9.58  | 11326.22 | 739.38 | 6.55 | 93.54 | 35.11 | 60.11 | 3.94 | 2.46 | 67.69 | 26.84 | 1.36 | 85.60 | 98.90 | 14670.00 | 92651.83 |
| 2011 | 73.81 | 64.06 | 9.75  | 12270.34 | 827.44 | 6.10 | 94.10 | 32.10 | 63.50 | 3.87 | 2.08 | 67.62 | 27.37 | 1.33 | 86.10 | 99.00 | 14150.10 | 92674.82 |
| 2012 | 74.22 | 64.39 | 9.82  | 12924.73 | 826.55 | 5.91 | 93.58 | 34.39 | 60.55 | 3.58 | 2.17 | 67.55 | 27.88 | 1.44 | 86.50 | 99.10 | 13943.92 | 92678.77 |
| 2013 | 74.28 | 64.48 | 9.81  | 13400.91 | 868.85 | 5.67 | 95.40 | 35.83 | 62.44 | 3.54 | 2.13 | 67.48 | 28.38 | 1.52 | 86.90 | 99.20 | -        | 92646.44 |
| 2014 | 74.81 | 64.90 | 9.91  | 13786.43 | 920.70 | 5.88 | 95.41 | 35.13 | 63.18 | 3.72 | 2.17 | 67.42 | 28.88 | 1.64 | 87.40 | 99.30 | -        | 92615.16 |
| 2015 | 74.95 | 65.03 | 9.92  | 14294.04 | -      | -    | -     | -     | -     | -    | -    | 67.38 | 29.40 | 1.64 | 87.80 | 99.30 | -        | 92570.98 |
| 2016 | 75.06 | 65.21 | 9.85  | 14718.03 | -      | -    | -     | -     | -     | -    | -    | 67.36 | 29.93 | -    | -     | -     | -        | 92527.04 |
| 2017 | 75.17 | 64.58 | 10.59 | -        | -      | -    | -     | -     | -     | -    | -    | -     | -     | -    | -     | -     | -        | -        |

|         |      |       |       |       |         |        |       |       |       |       |      |      |       |       |      |       |       |          |          |
|---------|------|-------|-------|-------|---------|--------|-------|-------|-------|-------|------|------|-------|-------|------|-------|-------|----------|----------|
| Lebanon | 1995 | 73.54 | 62.79 | 10.75 | 6703.23 | 460.52 | 12.56 | 80.71 | 53.46 | 33.77 | 4.24 | 8.32 | 84.82 | 10.22 | 2.62 | -     | 83.30 | 15558.42 | 90308.06 |
|         | 1996 | 74.07 | 63.20 | 10.87 | 6961.33 | 568.51 | 13.44 | 80.73 | 50.74 | 37.15 | 4.99 | 8.45 | 85.14 | 10.39 | 2.54 | -     | 83.30 | 16648.26 | 90366.19 |
|         | 1997 | 74.72 | 63.75 | 10.97 | 6754.39 | 665.04 | 13.06 | 80.64 | 49.40 | 38.75 | 5.06 | 8.00 | 85.46 | 10.55 | 2.47 | -     | 83.30 | 18223.05 | 90443.73 |
|         | 1998 | 75.31 | 64.23 | 11.08 | 6949.23 | 634.16 | 11.42 | 82.26 | 59.61 | 27.53 | 3.14 | 8.28 | 85.77 | 10.71 | 2.39 | 82.70 | 83.30 | 18388.35 | 90536.45 |
|         | 1999 | 76.03 | 64.79 | 11.24 | 6824.18 | 599.33 | 10.87 | 81.49 | 59.43 | 27.08 | 2.94 | 7.93 | 85.89 | 10.88 | 2.31 | 82.70 | 84.50 | 18215.94 | 90654.88 |
|         | 2000 | 76.47 | 65.26 | 11.21 | 6747.63 | 579.03 | 10.86 | 80.67 | 56.85 | 29.52 | 3.21 | 7.66 | 86.00 | 11.06 | 2.23 | 82.70 | 85.70 | 16825.66 | 90790.38 |
|         | 2001 | 76.98 | 65.57 | 11.41 | 6749.15 | 571.03 | 10.90 | 79.71 | 52.42 | 34.24 | 3.73 | 7.17 | 86.12 | 11.09 | 2.13 | 82.70 | 86.90 | 18142.41 | 90903.91 |
|         | 2002 | 77.37 | 65.89 | 11.48 | 6656.74 | 544.44 | 10.05 | 78.54 | 49.33 | 37.18 | 3.74 | 6.31 | 86.23 | 11.16 | 2.04 | 82.70 | 88.10 | 17968.86 | 91024.73 |
|         | 2003 | 77.70 | 66.17 | 11.53 | 6539.66 | 496.31 | 9.30  | 77.34 | 48.27 | 37.59 | 3.50 | 5.81 | 86.35 | 11.27 | 1.94 | 82.40 | 89.30 | 20293.95 | 91159.03 |
|         | 2004 | 78.01 | 66.43 | 11.58 | 6636.30 | 483.33 | 8.91  | 75.95 | 44.31 | 41.66 | 3.71 | 5.20 | 86.47 | 11.40 | 1.84 | 82.20 | 90.50 | 18716.22 | 91287.59 |
|         | 2005 | 78.26 | 66.80 | 11.46 | 6606.29 | 449.54 | 8.42  | 77.16 | 42.85 | 44.47 | 3.74 | 4.68 | 86.58 | 11.55 | 1.75 | 82.00 | 91.70 | 19431.45 | 91396.29 |
|         | 2006 | 77.95 | 66.58 | 11.37 | 6592.54 | 474.40 | 8.83  | 75.23 | 44.29 | 41.13 | 3.63 | 5.20 | 86.70 | 11.72 | 1.68 | 81.80 | 92.90 | 16947.88 | 91477.52 |
|         | 2007 | 78.63 | 66.95 | 11.69 | 7157.55 | 535.63 | 8.90  | 73.47 | 41.73 | 41.73 | 3.72 | 5.19 | 86.82 | 11.87 | 1.63 | 81.60 | 94.10 | 15102.07 | 91550.70 |
|         | 2008 | 79.12 | 67.33 | 11.79 | 7859.94 | 566.25 | 8.07  | 71.90 | 43.89 | 38.97 | 3.14 | 4.93 | 86.94 | 12.02 | 1.60 | 81.30 | 95.30 | 18270.36 | 91631.89 |
|         | 2009 | 79.45 | 67.58 | 11.87 | 8501.11 | 623.90 | 7.42  | 73.15 | 42.38 | 42.07 | 3.12 | 4.30 | 87.06 | 12.19 | 1.60 | 81.10 | 96.50 | -        | 91732.79 |
|         | 2010 | 79.81 | 68.05 | 11.76 | 8858.28 | 630.23 | 7.19  | 73.15 | 45.60 | 37.66 | 2.71 | 4.48 | 87.18 | 12.37 | 1.61 | 80.90 | 97.70 | -        | 91862.14 |
|         | 2011 | 78.99 | 67.20 | 11.79 | 8450.11 | 621.85 | 7.12  | 74.74 | 45.95 | 38.52 | 2.74 | 4.38 | 87.30 | 12.23 | 1.64 | 80.70 | 99.00 | -        | 91921.04 |
|         | 2012 | 80.15 | 68.13 | 12.02 | 8107.44 | 626.09 | 6.99  | 69.51 | 37.34 | 46.29 | 3.24 | 3.76 | 87.43 | 12.12 | 1.67 | 80.70 | 99.00 | -        | 91980.94 |
|         | 2013 | 79.92 | 67.96 | 11.96 | 7753.88 | 597.19 | 6.63  | 69.51 | 37.50 | 46.04 | 3.05 | 3.58 | 87.55 | 12.04 | 1.70 | 80.70 | 99.00 | -        | 92045.48 |
|         | 2014 | 80.00 | 68.03 | 11.97 | 7447.36 | 568.71 | 6.39  | 69.51 | 36.42 | 47.61 | 3.04 | 3.35 | 87.67 | 12.00 | 1.71 | 80.70 | 99.00 | -        | 92091.34 |

|         |      |       |       |       |         |        |       |       |       |       |      |      |       |       |      |       |       |         |          |
|---------|------|-------|-------|-------|---------|--------|-------|-------|-------|-------|------|------|-------|-------|------|-------|-------|---------|----------|
|         | 2015 | 80.04 | 68.07 | 11.97 | 7189.63 | -      | -     | -     | -     | -     | -    | -    | 87.79 | 12.00 | 1.72 | 80.70 | 99.00 | -       | 92124.10 |
|         | 2016 | 80.07 | 68.28 | 11.79 | 7143.96 | -      | -     | -     | -     | -     | -    | -    | 87.91 | 12.21 | -    | -     | -     | -       | 92212.98 |
|         | 2017 | 77.97 | 66.26 | 11.71 | -       | -      | -     | -     | -     | -     | -    | -    | -     | -     | -    | -     | -     | -       | -        |
| Lesotho | 1995 | 57.68 | 50.23 | 7.45  | 804.84  | 36.55  | 7.46  | 80.64 | 42.14 | 47.73 | 3.56 | 3.90 | 16.96 | 7.95  | 4.55 | 22.70 | 78.00 | 1938.44 | 88827.82 |
|         | 1996 | 56.46 | 49.20 | 7.27  | 837.56  | 34.38  | 7.50  | 79.76 | 39.54 | 50.42 | 3.78 | 3.72 | 17.57 | 8.06  | 4.48 | 22.80 | 78.20 | 1839.49 | 88836.12 |
|         | 1997 | 54.86 | 47.83 | 7.03  | 857.46  | 32.06  | 6.72  | 77.10 | 41.32 | 46.40 | 3.12 | 3.60 | 18.05 | 8.16  | 4.39 | 22.80 | 78.40 | 1810.89 | 88843.54 |
|         | 1998 | 52.70 | 46.02 | 6.69  | 860.74  | 30.81  | 6.85  | 71.57 | 37.38 | 47.77 | 3.27 | 3.58 | 18.54 | 8.24  | 4.30 | 22.90 | 78.60 | 4735.80 | 88859.84 |
|         | 1999 | 50.85 | 44.43 | 6.43  | 855.85  | 29.45  | 6.76  | 71.35 | 37.16 | 47.92 | 3.24 | 3.52 | 19.04 | 8.29  | 4.20 | 23.40 | 78.80 | 3817.01 | 88872.16 |
|         | 2000 | 48.82 | 42.60 | 6.23  | 880.37  | 28.73  | 6.92  | 71.13 | 35.40 | 50.24 | 3.47 | 3.44 | 19.55 | 8.28  | 4.09 | 23.90 | 79.00 | 3230.58 | 88894.11 |
|         | 2001 | 47.50 | 41.49 | 6.01  | 903.38  | 28.42  | 7.53  | 71.88 | 30.14 | 58.07 | 4.37 | 3.16 | 20.07 | 8.31  | 3.97 | 24.30 | 79.10 | 3844.31 | 88882.21 |
|         | 2002 | 46.06 | 40.27 | 5.78  | 902.10  | 24.06  | 6.91  | 69.01 | 30.74 | 55.46 | 3.83 | 3.08 | 20.60 | 8.32  | 3.86 | 24.80 | 79.30 | 2941.82 | 88873.49 |
|         | 2003 | 44.73 | 39.15 | 5.58  | 935.47  | 36.39  | 7.13  | 69.01 | 29.96 | 56.59 | 4.03 | 3.09 | 21.14 | 8.29  | 3.74 | 25.30 | 79.50 | 4650.11 | 88862.81 |
|         | 2004 | 43.82 | 38.34 | 5.48  | 943.61  | 44.95  | 6.96  | 69.01 | 29.99 | 56.55 | 3.94 | 3.03 | 21.69 | 8.21  | 3.64 | 25.70 | 79.70 | 2341.00 | 88850.82 |
|         | 2005 | 43.27 | 37.77 | 5.50  | 968.40  | 44.73  | 6.30  | 69.01 | 32.73 | 52.57 | 3.31 | 2.99 | 22.25 | 8.10  | 3.55 | 26.20 | 79.90 | 3703.90 | 88864.05 |
|         | 2006 | 43.24 | 37.81 | 5.43  | 1001.09 | 52.40  | 7.12  | 69.01 | 28.51 | 58.68 | 4.18 | 2.94 | 22.82 | 8.00  | 3.47 | 26.70 | 80.10 | 2161.30 | 88863.73 |
|         | 2007 | 43.67 | 38.23 | 5.44  | 1040.67 | 69.17  | 8.47  | 69.01 | 66.10 | 66.10 | 5.60 | 2.87 | 23.29 | 7.87  | 3.41 | 27.10 | 80.30 | 4439.43 | 88858.82 |
|         | 2008 | 44.36 | 38.82 | 5.54  | 1101.00 | 73.18  | 8.85  | 69.01 | 21.76 | 68.46 | 6.06 | 2.79 | 23.77 | 7.73  | 3.37 | 27.60 | 80.50 | 2543.50 | 88858.78 |
|         | 2009 | 45.44 | 39.71 | 5.73  | 1113.98 | 84.22  | 9.80  | 69.01 | 19.69 | 71.47 | 7.00 | 2.79 | 24.26 | 7.62  | 3.33 | 28.00 | 80.70 | 2727.98 | 88866.04 |
|         | 2010 | 46.53 | 40.53 | 6.00  | 1169.27 | 118.26 | 10.87 | 69.01 | 17.71 | 74.33 | 8.08 | 2.79 | 24.75 | 7.55  | 3.30 | 28.50 | 80.80 | 3425.28 | 88879.84 |
|         | 2011 | 47.56 | 41.46 | 6.10  | 1235.66 | 146.32 | 11.79 | 69.01 | 15.81 | 77.09 | 9.09 | 2.70 | 25.25 | 7.50  | 3.28 | 28.90 | 81.00 | 3449.41 | 88873.12 |
|         | 2012 | 47.88 | 41.79 | 6.10  | 1293.63 | 129.15 | 11.14 | 69.01 | 16.70 | 75.80 | 8.45 | 2.70 | 25.76 | 7.47  | 3.25 | 29.30 | 81.20 | 3472.71 | 88871.01 |
|         | 2013 | 48.09 | 41.99 | 6.10  | 1300.41 | 114.16 | 11.07 | 69.01 | 16.61 | 75.94 | 8.41 | 2.66 | 26.27 | 7.45  | 3.22 | 29.80 | 81.40 | -       | 88863.35 |
|         | 2014 | 48.57 | 42.41 | 6.16  | 1323.24 | 105.11 | 10.62 | 69.01 | 16.48 | 76.12 | 8.08 | 2.54 | 26.79 | 7.43  | 3.19 | 30.20 | 81.60 | -       | 88864.21 |
|         | 2015 | 49.50 | 43.18 | 6.32  | 1338.54 | -      | -     | -     | -     | -     | -    | -    | 27.31 | 7.41  | 3.14 | 30.30 | 81.80 | -       | 88885.17 |
|         | 2016 | 50.31 | 43.82 | 6.49  | 1352.48 | -      | -     | -     | -     | -     | -    | -    | 27.84 | 7.46  | -    | -     | -     | -       | 88884.47 |
|         | 2017 | 54.66 | 46.95 | 7.71  | -       | -      | -     | -     | -     | -     | -    | -    | -     | -     | -    | -     | -     | -       | -        |
| Liberia | 1995 | 50.28 | 42.59 | 7.70  | 115.79  | -      | -     | -     | -     | -     | -    | -    | 45.96 | 5.71  | 6.16 | 13.10 | 61.30 | 1428.10 | 89774.93 |
|         | 1996 | 49.21 | 41.80 | 7.41  | 122.86  | -      | -     | -     | -     | -     | -    | -    | 42.96 | 5.68  | 6.11 | 12.50 | 60.50 | 1491.94 | 89894.75 |
|         | 1997 | 52.33 | 44.38 | 7.95  | 235.45  | -      | -     | -     | -     | -     | -    | -    | 43.30 | 5.67  | 6.06 | 12.60 | 60.60 | 1602.41 | 90019.99 |

|      |       |       |       |        |       |       |       |       |       |      |       |       |      |      |       |       |         |          |
|------|-------|-------|-------|--------|-------|-------|-------|-------|-------|------|-------|-------|------|------|-------|-------|---------|----------|
| 1998 | 52.60 | 44.67 | 7.93  | 283.43 | 8.33  | 5.92  | 50.34 | 37.93 | 24.65 | 1.46 | 4.46  | 43.65 | 5.68 | 6.01 | 12.60 | 60.70 | 4980.42 | 90100.18 |
| 1999 | 53.60 | 45.54 | 8.06  | 321.90 | 9.73  | 6.04  | 50.34 | 37.23 | 26.05 | 1.57 | 4.46  | 43.99 | 5.71 | 5.95 | 12.90 | 61.60 | 3371.33 | 90154.69 |
| 2000 | 54.44 | 46.28 | 8.16  | 392.49 | 10.82 | 5.91  | 50.34 | 38.01 | 24.50 | 1.45 | 4.46  | 44.33 | 5.77 | 5.88 | 13.10 | 62.40 | 2076.32 | 90169.86 |
| 2001 | 55.26 | 46.98 | 8.28  | 389.55 | 11.00 | 6.41  | 50.61 | 37.60 | 25.71 | 1.65 | 4.76  | 44.67 | 5.77 | 5.80 | 13.40 | 63.30 | 2163.91 | 90054.75 |
| 2002 | 54.85 | 46.70 | 8.14  | 394.74 | 9.47  | 5.43  | 50.21 | 40.12 | 20.10 | 1.09 | 4.34  | 45.02 | 5.74 | 5.72 | 13.60 | 64.20 | 2047.19 | 89953.03 |
| 2003 | 54.85 | 46.74 | 8.11  | 271.02 | 4.50  | 3.44  | 46.06 | 30.12 | 34.60 | 1.19 | 2.25  | 45.36 | 5.71 | 5.64 | 13.80 | 65.00 | 2062.91 | 89859.66 |
| 2004 | 57.54 | 48.95 | 8.60  | 272.86 | 12.87 | 8.77  | 51.64 | 37.43 | 27.51 | 2.41 | 6.36  | 45.71 | 5.67 | 5.55 | 14.10 | 65.90 | 2311.55 | 89808.37 |
| 2005 | 58.14 | 49.47 | 8.67  | 279.80 | 13.32 | 8.04  | 51.69 | 41.70 | 19.33 | 1.55 | 6.48  | 46.05 | 5.62 | 5.46 | 14.30 | 66.80 | 2082.70 | 89792.23 |
| 2006 | 58.65 | 49.96 | 8.69  | 292.04 | 18.42 | 10.90 | 52.51 | 42.86 | 18.38 | 2.00 | 8.90  | 46.40 | 5.66 | 5.37 | 14.60 | 67.60 | 2475.90 | 89834.84 |
| 2007 | 59.15 | 50.42 | 8.73  | 307.40 | 21.47 | 10.24 | 52.09 | 27.04 | 27.04 | 2.77 | 7.47  | 46.74 | 5.70 | 5.28 | 14.80 | 68.50 | 2847.61 | 89875.92 |
| 2008 | 59.73 | 50.96 | 8.78  | 315.88 | 27.37 | 11.83 | 52.24 | 35.00 | 33.00 | 3.90 | 7.92  | 47.09 | 5.73 | 5.19 | 15.10 | 69.40 | 2863.14 | 89929.89 |
| 2009 | 60.24 | 51.42 | 8.82  | 319.66 | 43.50 | 14.39 | 30.05 | 23.09 | 23.18 | 3.34 | 11.05 | 47.44 | 5.75 | 5.11 | 15.30 | 70.30 | 2599.80 | 89974.25 |
| 2010 | 60.75 | 51.90 | 8.85  | 327.42 | 38.76 | 11.87 | 35.17 | 27.04 | 23.10 | 2.74 | 9.13  | 47.80 | 5.73 | 5.02 | 15.60 | 71.10 | 2758.55 | 90016.08 |
| 2011 | 61.37 | 52.46 | 8.91  | 343.65 | 42.34 | 11.23 | 44.83 | 29.16 | 34.96 | 3.93 | 7.31  | 48.17 | 5.73 | 4.94 | 15.80 | 72.00 | 2797.37 | 90028.37 |
| 2012 | 62.09 | 53.11 | 8.97  | 361.23 | 42.15 | 10.19 | 44.85 | 29.94 | 33.24 | 3.39 | 6.80  | 48.54 | 5.69 | 4.87 | 16.10 | 72.90 | 2833.94 | 90040.90 |
| 2013 | 62.72 | 53.70 | 9.02  | 383.08 | 41.93 | 9.25  | 44.85 | 31.12 | 30.60 | 2.83 | 6.42  | 48.92 | 5.63 | 4.79 | 16.40 | 73.80 | -       | 90060.23 |
| 2014 | 59.36 | 51.05 | 8.31  | 376.59 | 46.27 | 10.04 | 44.85 | 30.73 | 31.48 | 3.16 | 6.88  | 49.31 | 5.58 | 4.72 | 16.60 | 74.70 | -       | 90094.91 |
| 2015 | 63.80 | 54.71 | 9.09  | 367.48 | -     | -     | -     | -     | -     | -    | -     | 49.70 | 5.54 | 4.65 | 16.90 | 75.60 | -       | 90130.35 |
| 2016 | 64.38 | 55.27 | 9.11  | 352.65 | -     | -     | -     | -     | -     | -    | -     | 50.10 | 5.54 | -    | -     | -     | -       | 90158.16 |
| 2017 | 64.41 | 54.33 | 10.07 | -      | -     | -     | -     | -     | -     | -    | -     | -     | -    | -    | -     | -     | -       | -        |

|       |      |       |       |       |         |        |      |        |       |       |      |      |       |      |      |       |       |          |          |
|-------|------|-------|-------|-------|---------|--------|------|--------|-------|-------|------|------|-------|------|------|-------|-------|----------|----------|
| Libya | 1995 | 74.04 | 63.34 | 10.69 | -       | 190.09 | 3.28 | 100.00 | 53.79 | 46.21 | 1.51 | 1.76 | 75.99 | 5.84 | 3.64 | 96.50 | 71.20 | 65215.47 | 89323.15 |
|       | 1996 | 74.06 | 63.37 | 10.69 | -       | 210.86 | 3.35 | 100.00 | 50.37 | 49.63 | 1.66 | 1.69 | 76.05 | 5.90 | 3.44 | 96.50 | 71.20 | 67250.67 | 89371.08 |
|       | 1997 | 74.30 | 63.58 | 10.72 | -       | 226.65 | 3.46 | 100.00 | 48.21 | 51.79 | 1.79 | 1.67 | 76.11 | 5.95 | 3.27 | 96.50 | 71.20 | 63411.21 | 89433.82 |
|       | 1998 | 74.34 | 63.63 | 10.71 | -       | 226.26 | 3.90 | 100.00 | 51.68 | 48.32 | 1.88 | 2.02 | 76.18 | 5.99 | 3.11 | 96.50 | 71.20 | 63333.03 | 89511.28 |
|       | 1999 | 74.39 | 63.67 | 10.72 | 8782.83 | 233.89 | 3.65 | 100.00 | 54.75 | 45.25 | 1.65 | 2.00 | 76.26 | 6.02 | 2.98 | 96.50 | 71.20 | 60164.76 | 89606.43 |
|       | 2000 | 74.34 | 63.63 | 10.70 | 8967.25 | 245.62 | 3.41 | 100.00 | 51.29 | 48.71 | 1.66 | 1.75 | 76.35 | 6.04 | 2.86 | 96.50 | 71.20 | 63666.89 | 89718.04 |
|       | 2001 | 74.55 | 63.81 | 10.74 | 8671.84 | 254.61 | 4.06 | 100.00 | 45.53 | 54.47 | 2.21 | 1.85 | 76.44 | 6.06 | 2.75 | 96.50 | 71.20 | 62555.04 | 89758.19 |
|       | 2002 | 74.61 | 63.87 | 10.74 | 8453.58 | 181.40 | 4.57 | 100.00 | 33.09 | 66.91 | 3.06 | 1.51 | 76.54 | 6.06 | 2.67 | 96.50 | -     | 63328.59 | 89823.38 |
|       | 2003 | 74.79 | 64.01 | 10.77 | 9403.45 | 190.07 | 4.06 | 100.00 | 33.76 | 66.24 | 2.69 | 1.37 | 76.66 | 6.06 | 2.60 | 96.50 | -     | 68226.67 | 89921.74 |

|      |       |       |       |          |        |      |        |       |       |      |      |       |      |      |       |   |          |          |
|------|-------|-------|-------|----------|--------|------|--------|-------|-------|------|------|-------|------|------|-------|---|----------|----------|
| 2004 | 74.94 | 64.14 | 10.80 | 9670.08  | 202.01 | 3.46 | 100.00 | 34.21 | 65.79 | 2.28 | 1.18 | 76.77 | 6.06 | 2.54 | 96.50 | - | 68566.55 | 90010.38 |
| 2005 | 75.17 | 64.32 | 10.84 | 10653.78 | 211.95 | 2.71 | 100.00 | 35.35 | 64.65 | 1.75 | 0.96 | 76.90 | 6.05 | 2.49 | 96.50 | - | 69931.74 | 90111.22 |
| 2006 | 75.38 | 64.51 | 10.88 | 11175.13 | 233.94 | 2.51 | 100.00 | 34.63 | 65.37 | 1.64 | 0.87 | 77.03 | 6.11 | 2.46 | 96.50 | - | 71318.67 | 90177.32 |
| 2007 | 75.51 | 64.58 | 10.93 | 11707.99 | 273.51 | 2.63 | 100.00 | 66.56 | 66.56 | 1.75 | 0.88 | 77.18 | 6.16 | 2.44 | 96.50 | - | 71090.57 | 90257.12 |
| 2008 | 75.67 | 64.69 | 10.98 | 11856.02 | 317.77 | 2.04 | 100.00 | 32.27 | 67.73 | 1.38 | 0.66 | 77.32 | 6.20 | 2.43 | 96.60 | - | 74238.82 | 90344.37 |
| 2009 | 75.84 | 64.80 | 11.03 | 11631.72 | 350.64 | 3.16 | 100.00 | 31.12 | 68.88 | 2.18 | 0.98 | 77.48 | 6.23 | 2.42 | 96.60 | - | 73995.42 | 90446.52 |
| 2010 | 76.05 | 64.98 | 11.07 | 12120.56 | 394.34 | 3.05 | 100.00 | 30.00 | 70.00 | 2.14 | 0.92 | 77.64 | 6.22 | 2.41 | 96.60 | - | 77780.09 | 90563.55 |
| 2011 | 60.25 | 52.23 | 8.03  | 4578.53  | 307.86 | 4.77 | 100.00 | 36.69 | 63.31 | 3.02 | 1.75 | 77.81 | 6.28 | 2.40 | 96.60 | - | 80072.82 | 90682.90 |
| 2012 | 75.50 | 64.55 | 10.95 | -        | 655.43 | 4.30 | 100.00 | 29.75 | 70.25 | 3.02 | 1.28 | 77.99 | 6.32 | 2.39 | 96.60 | - | 82129.13 | 90833.90 |
| 2013 | 75.90 | 64.88 | 11.03 | -        | 516.07 | 4.33 | 100.00 | 30.33 | 69.67 | 3.02 | 1.31 | 78.17 | 6.35 | 2.37 | 96.60 | - | -        | 90981.78 |
| 2014 | 74.37 | 63.62 | 10.75 | -        | 371.72 | 4.97 | 100.00 | 26.46 | 73.54 | 3.65 | 1.31 | 78.36 | 6.39 | 2.35 | 96.60 | - | -        | 91159.87 |
| 2015 | 74.08 | 63.44 | 10.64 | -        | -      | -    | -      | -     | -     | -    | -    | 78.55 | 6.45 | 2.31 | 96.60 | - | -        | 91354.40 |
| 2016 | 75.05 | 64.21 | 10.85 | -        | -      | -    | -      | -     | -     | -    | -    | 78.75 | 6.49 | -    | -     | - | -        | 91581.98 |
| 2017 | 72.96 | 62.13 | 10.82 | -        | -      | -    | -      | -     | -     | -    | -    | -     | -    | -    | -     | - | -        | -        |

|           |      |       |       |      |          |        |      |       |       |       |      |      |       |       |      |       |       |          |          |
|-----------|------|-------|-------|------|----------|--------|------|-------|-------|-------|------|------|-------|-------|------|-------|-------|----------|----------|
| Lithuania | 1995 | 68.92 | 60.13 | 8.79 | 5322.42  | 99.33  | 5.37 | 86.63 | 22.39 | 74.15 | 3.99 | 1.39 | 67.29 | 18.63 | 1.55 | 84.70 | 89.10 | 29219.71 | 91322.75 |
|           | 1996 | 70.17 | 61.14 | 9.02 | 5639.24  | 130.21 | 5.59 | 88.36 | 26.18 | 70.37 | 3.93 | 1.65 | 67.23 | 19.21 | 1.49 | 85.00 | 89.50 | 30160.76 | 91483.33 |
|           | 1997 | 71.11 | 61.86 | 9.24 | 6152.14  | 162.01 | 5.74 | 88.97 | 24.46 | 72.51 | 4.16 | 1.58 | 67.17 | 19.74 | 1.47 | 85.40 | 89.90 | 29876.40 | 91643.51 |
|           | 1998 | 71.38 | 62.08 | 9.29 | 6659.60  | 192.03 | 6.08 | 95.74 | 23.03 | 75.95 | 4.62 | 1.46 | 67.11 | 20.21 | 1.46 | 85.80 | 90.20 | 25363.91 | 91780.41 |
|           | 1999 | 71.83 | 62.43 | 9.40 | 6630.91  | 192.45 | 6.20 | 99.56 | 24.98 | 74.91 | 4.65 | 1.56 | 67.05 | 20.65 | 1.46 | 86.20 | 90.60 | 22732.14 | 91911.54 |
|           | 2000 | 72.10 | 62.64 | 9.46 | 6933.59  | 211.49 | 6.46 | 86.22 | 26.12 | 69.71 | 4.50 | 1.96 | 66.99 | 21.06 | 1.39 | 86.60 | 91.00 | 21257.13 | 92071.40 |
|           | 2001 | 71.61 | 62.29 | 9.33 | 7447.08  | 219.45 | 6.26 | 97.01 | 26.54 | 72.65 | 4.55 | 1.71 | 66.92 | 21.62 | 1.29 | 86.90 | 91.40 | 21048.71 | 92215.69 |
|           | 2002 | 72.00 | 62.60 | 9.40 | 8014.64  | 263.65 | 6.40 | 98.21 | 24.63 | 74.92 | 4.79 | 1.60 | 66.83 | 22.18 | 1.23 | 87.30 | 91.80 | 21963.75 | 92379.84 |
|           | 2003 | 72.03 | 62.65 | 9.39 | 8931.52  | 352.04 | 6.46 | 98.22 | 23.26 | 76.32 | 4.93 | 1.53 | 66.74 | 22.73 | 1.26 | 87.70 | 92.20 | 21789.31 | 92514.09 |
|           | 2004 | 72.01 | 62.62 | 9.39 | 9624.01  | 378.28 | 5.67 | 98.44 | 31.93 | 67.55 | 3.83 | 1.84 | 66.65 | 23.27 | 1.27 | 88.10 | 92.60 | 22521.04 | 92629.90 |
|           | 2005 | 71.34 | 62.15 | 9.19 | 10537.91 | 453.88 | 5.83 | 98.55 | 31.75 | 67.77 | 3.95 | 1.88 | 66.64 | 23.77 | 1.29 | 88.50 | 93.00 | 23569.41 | 92738.40 |
|           | 2006 | 71.07 | 61.94 | 9.13 | 11500.53 | 569.67 | 6.20 | 98.36 | 29.98 | 69.51 | 4.31 | 1.89 | 66.71 | 24.22 | 1.33 | 88.90 | 93.40 | 24082.21 | 92768.08 |
|           | 2007 | 70.81 | 61.71 | 9.10 | 12928.26 | 753.19 | 6.22 | 98.33 | 72.98 | 72.98 | 4.54 | 1.68 | 66.78 | 24.60 | 1.36 | 89.30 | 93.80 | 25791.10 | 92779.09 |
|           | 2008 | 71.55 | 62.27 | 9.27 | 13405.19 | 976.91 | 6.61 | 97.97 | 27.04 | 72.40 | 4.78 | 1.82 | 66.85 | 24.91 | 1.45 | 89.70 | 94.20 | 26732.65 | 92770.92 |
|           | 2009 | 73.04 | 63.39 | 9.65 | 11546.82 | 876.78 | 7.53 | 97.40 | 26.46 | 72.82 | 5.49 | 2.05 | 66.84 | 25.18 | 1.50 | 90.10 | 94.60 | 24473.52 | 92758.76 |

|            |      |       |       |       |          |         |      |        |       |       |      |      |       |       |      |       |        |          |          |
|------------|------|-------|-------|-------|----------|---------|------|--------|-------|-------|------|------|-------|-------|------|-------|--------|----------|----------|
|            | 2010 | 73.21 | 63.57 | 9.64  | 11984.87 | 828.65  | 7.09 | 97.78  | 26.83 | 70.81 | 5.02 | 1.95 | 66.76 | 25.41 | 1.50 | 90.50 | 95.00  | 26786.48 | 92761.28 |
|            | 2011 | 73.58 | 63.83 | 9.75  | 13000.19 | 967.81  | 6.86 | 97.59  | 27.02 | 69.12 | 4.74 | 1.90 | 66.67 | 25.91 | 1.55 | 90.80 | 95.40  | 29324.69 | 92736.08 |
|            | 2012 | 73.96 | 64.15 | 9.82  | 13681.00 | 940.10  | 6.67 | 97.49  | 30.36 | 65.23 | 4.35 | 2.08 | 66.60 | 26.41 | 1.60 | 91.20 | 95.80  | 29442.21 | 92733.22 |
|            | 2013 | 74.12 | 64.29 | 9.83  | 14304.80 | 1019.79 | 6.59 | 97.37  | 30.87 | 65.44 | 4.31 | 2.09 | 66.55 | 26.92 | 1.59 | 91.60 | 96.20  | -        | 92733.50 |
|            | 2014 | 74.83 | 64.83 | 9.99  | 14932.60 | 1063.42 | 6.55 | 97.31  | 31.27 | 67.87 | 4.45 | 2.11 | 66.52 | 27.44 | 1.63 | 92.00 | 96.60  | -        | 92763.28 |
|            | 2015 | 74.97 | 64.96 | 10.01 | 15341.84 | -       | -    | -      | -     | -     | -    | -    | 66.51 | 28.01 | 1.63 | 92.40 | 96.60  | -        | 92797.88 |
|            | 2016 | 75.16 | 65.20 | 9.96  | 15872.72 | -       | -    | -      | -     | -     | -    | -    | 66.51 | 28.35 | -    | -     | -      | -        | 92846.43 |
|            | 2017 | 75.02 | 64.33 | 10.68 | -        | -       | -    | -      | -     | -     | -    | -    | -     | -     | -    | -     | -      | -        | -        |
| Luxembourg | 1995 | 76.84 | 66.51 | 10.32 | 74776.81 | 2841.61 | 5.57 | 100.00 | 6.19  | 92.44 | 5.15 | 0.34 | 82.89 | 20.56 | 1.70 | 97.70 | 100.00 | 10728.91 | 92460.48 |
|            | 1996 | 77.07 | 66.72 | 10.35 | 74790.07 | 2830.06 | 5.65 | 100.03 | 7.20  | 92.81 | 5.25 | 0.41 | 82.83 | 20.77 | 1.77 | 97.70 | 100.00 | 10528.99 | 92423.83 |
|            | 1997 | 77.33 | 66.95 | 10.38 | 78075.53 | 2489.74 | 5.59 | 100.00 | 7.45  | 92.48 | 5.17 | 0.42 | 82.78 | 20.90 | 1.71 | 97.70 | 100.00 | 10135.52 | 92428.21 |
|            | 1998 | 77.72 | 67.26 | 10.46 | 81771.44 | 2598.89 | 5.67 | 100.00 | 7.58  | 92.42 | 5.24 | 0.43 | 82.89 | 20.97 | 1.68 | 97.70 | 100.00 | 9328.09  | 92444.67 |
|            | 1999 | 78.10 | 67.57 | 10.53 | 87516.45 | 2891.01 | 5.83 | 72.91  | 7.36  | 89.79 | 5.23 | 0.59 | 83.45 | 21.00 | 1.74 | 97.70 | 100.00 | 9683.29  | 92433.90 |
|            | 2000 | 78.51 | 67.88 | 10.62 | 93462.92 | 3500.00 | 7.48 | 79.05  | 11.80 | 85.07 | 6.36 | 1.12 | 84.22 | 21.01 | 1.76 | 97.70 | 100.00 | 10268.36 | 92456.26 |
|            | 2001 | 78.75 | 68.10 | 10.65 | 94695.34 | 3405.29 | 7.40 | 79.13  | 12.46 | 84.25 | 6.24 | 1.17 | 84.84 | 21.19 | 1.66 | 97.70 | 100.00 | 10701.18 | 92470.43 |
|            | 2002 | 79.01 | 68.32 | 10.69 | 97287.60 | 4202.19 | 8.27 | 81.74  | 11.82 | 85.53 | 7.07 | 1.20 | 85.30 | 21.34 | 1.63 | 97.70 | 100.00 | 11557.26 | 92513.43 |
|            | 2003 | 79.13 | 68.45 | 10.68 | 97678.46 | 4987.75 | 7.67 | 77.49  | 12.23 | 84.22 | 6.46 | 1.21 | 85.74 | 21.45 | 1.62 | 97.70 | 100.00 | 12047.22 | 92548.41 |
|            | 2004 | 79.60 | 68.82 | 10.78 | 99778.47 | 6145.32 | 8.20 | 76.65  | 11.64 | 84.81 | 6.96 | 1.25 | 86.18 | 21.51 | 1.66 | 97.70 | 100.00 | 13115.92 | 92583.88 |
|            | 2005 | 80.04 | 69.17 | 10.88 | 101380.7 | 6488.07 | 7.95 | 76.90  | 11.59 | 84.92 | 6.75 | 1.20 | 86.60 | 21.54 | 1.63 | 97.70 | 100.00 | 13445.82 | 92633.03 |
|            | 2006 | 80.43 | 69.48 | 10.95 | 104943.4 | 7029.83 | 7.75 | 77.64  | 11.54 | 85.13 | 6.60 | 1.15 | 87.01 | 21.31 | 1.65 | 97.70 | 100.00 | 13493.66 | 92651.36 |
|            | 2007 | 80.75 | 69.74 | 11.01 | 111968.3 | 7329.37 | 6.80 | 65.16  | 85.61 | 85.61 | 5.82 | 0.98 | 87.41 | 21.06 | 1.61 | 97.60 | 100.00 | 13072.44 | 92669.92 |
|            | 2008 | 81.08 | 70.01 | 11.07 | 108577.3 | 8303.75 | 7.34 | 79.37  | 9.15  | 88.48 | 6.49 | 0.85 | 87.80 | 20.81 | 1.61 | 97.60 | 100.00 | 12702.34 | 92693.05 |
|            | 2009 | 81.27 | 70.17 | 11.10 | 101939.6 | 8126.26 | 8.11 | 69.32  | 9.30  | 86.58 | 7.03 | 1.09 | 88.18 | 20.61 | 1.59 | 97.60 | 100.00 | 12343.32 | 92707.20 |
|            | 2010 | 81.44 | 70.31 | 11.13 | 104965.3 | 7964.46 | 7.68 | 67.71  | 9.58  | 85.86 | 6.59 | 1.09 | 88.55 | 20.47 | 1.63 | 97.60 | 100.00 | 13034.82 | 92736.64 |
|            | 2011 | 81.56 | 70.43 | 11.12 | 105264.7 | 8333.58 | 7.34 | 71.70  | 10.55 | 85.28 | 6.26 | 1.08 | 88.91 | 20.33 | 1.52 | 97.60 | 100.00 | 12929.54 | 92778.19 |
|            | 2012 | 81.81 | 70.65 | 11.16 | 102404.6 | 7550.71 | 7.18 | 66.33  | 10.97 | 83.46 | 5.99 | 1.19 | 89.25 | 20.23 | 1.57 | 97.60 | 100.00 | 12611.00 | 92813.28 |
|            | 2013 | 81.98 | 70.80 | 11.19 | 103721.7 | 7980.83 | 7.10 | 66.16  | 10.80 | 83.68 | 5.94 | 1.16 | 89.57 | 20.16 | 1.55 | 97.60 | 100.00 | -        | 92829.96 |
|            | 2014 | 81.95 | 70.79 | 11.16 | 107152.9 | 8137.52 | 6.94 | 65.97  | 10.60 | 83.93 | 5.82 | 1.12 | 89.87 | 20.12 | 1.50 | 97.60 | 100.00 | -        | 92872.94 |
|            | 2015 | 82.03 | 70.88 | 11.15 | 107648.6 | -       | -    | -      | -     | -     | -    | -    | 90.16 | 20.10 | 1.50 | 97.60 | 100.00 | -        | 92909.28 |

|                   |      |       |       |       |          |        |      |        |       |       |      |      |       |       |      |       |       |           |          |
|-------------------|------|-------|-------|-------|----------|--------|------|--------|-------|-------|------|------|-------|-------|------|-------|-------|-----------|----------|
|                   | 2016 | 82.12 | 70.96 | 11.16 | 108422.4 | -      | -    | -      | -     | -     | -    | -    | 90.43 | 20.38 | -    | -     | -     | -         | 92925.19 |
|                   | 2017 | 81.66 | 69.70 | 11.96 | -        | -      | -    | -      | -     | -     | -    | -    | -     | -     | -    | -     | -     | -         | -        |
| <b>Macedonia</b>  | 1995 | 71.13 | 62.64 | 8.49  | 3057.00  | 198.55 | 8.39 | 100.00 | 40.45 | 59.55 | 5.00 | 3.39 | 59.59 | 13.14 | 1.98 | -     | 99.30 | 11579.55  | 90664.37 |
|                   | 1996 | 71.42 | 62.90 | 8.52  | 3083.61  | 200.36 | 8.61 | 100.00 | 40.32 | 59.68 | 5.14 | 3.47 | 59.38 | 13.49 | 1.92 | -     | 99.30 | 12809.73  | 90737.77 |
|                   | 1997 | 71.58 | 63.05 | 8.53  | 3112.12  | 176.32 | 9.09 | 100.00 | 38.86 | 61.14 | 5.55 | 3.53 | 59.17 | 13.81 | 1.86 | -     | 99.30 | 11705.19  | 90841.27 |
|                   | 1998 | 71.65 | 63.11 | 8.54  | 3197.35  | 185.20 | 9.99 | 100.00 | 35.05 | 64.95 | 6.49 | 3.50 | 58.97 | 14.12 | 1.81 | -     | 99.30 | -         | 90943.26 |
|                   | 1999 | 71.89 | 63.31 | 8.58  | 3315.76  | 161.74 | 8.80 | 100.00 | 39.30 | 60.70 | 5.34 | 3.46 | 58.76 | 14.40 | 1.77 | -     | 99.30 | -         | 91040.15 |
|                   | 2000 | 72.18 | 63.57 | 8.61  | 3448.83  | 160.15 | 8.52 | 100.00 | 43.81 | 56.19 | 4.79 | 3.73 | 58.55 | 14.67 | 1.72 | 89.80 | 99.30 | -         | 91121.58 |
|                   | 2001 | 72.23 | 63.59 | 8.64  | 3329.92  | 150.22 | 8.18 | 100.00 | 43.41 | 56.59 | 4.63 | 3.55 | 58.34 | 14.99 | 1.68 | 89.80 | 99.30 | -         | 91203.46 |
|                   | 2002 | 72.45 | 63.77 | 8.68  | 3369.63  | 178.16 | 9.01 | 100.00 | 42.40 | 57.60 | 5.19 | 3.82 | 58.13 | 15.29 | 1.64 | 89.80 | 99.30 | -         | 91309.37 |
|                   | 2003 | 72.53 | 63.82 | 8.71  | 3436.97  | 223.70 | 9.17 | 100.00 | 43.01 | 56.99 | 5.23 | 3.94 | 57.92 | 15.57 | 1.61 | 89.80 | 99.30 | -         | 91417.15 |
|                   | 2004 | 72.67 | 63.92 | 8.75  | 3591.29  | 241.47 | 8.64 | 100.00 | 41.70 | 58.30 | 5.04 | 3.60 | 57.71 | 15.80 | 1.57 | 89.80 | 99.30 | 11251.00  | 91519.23 |
|                   | 2005 | 72.86 | 64.10 | 8.75  | 3755.04  | 243.73 | 7.95 | 100.00 | 39.88 | 60.12 | 4.78 | 3.17 | 57.53 | 16.00 | 1.53 | 90.00 | 99.30 | 11591.60  | 91629.15 |
|                   | 2006 | 73.07 | 64.28 | 8.80  | 3942.44  | 255.50 | 7.61 | 100.00 | 35.94 | 64.06 | 4.88 | 2.74 | 57.37 | 16.13 | 1.50 | 90.10 | 99.30 | 11559.34  | 91685.07 |
|                   | 2007 | 73.29 | 64.38 | 8.91  | 4192.95  | 280.97 | 6.90 | 100.00 | 64.44 | 64.44 | 4.45 | 2.45 | 57.24 | 16.22 | 1.48 | 90.30 | 99.30 | 12465.44  | 91719.73 |
|                   | 2008 | 73.50 | 64.52 | 8.98  | 4418.27  | 330.65 | 6.85 | 100.00 | 30.71 | 69.29 | 4.75 | 2.10 | 57.13 | 16.29 | 1.47 | 90.50 | 99.30 | 11742.82  | 91756.05 |
|                   | 2009 | 73.64 | 64.61 | 9.03  | 4398.77  | 308.76 | 6.74 | 100.00 | 33.84 | 66.16 | 4.46 | 2.28 | 57.05 | 16.36 | 1.46 | 90.60 | 99.30 | 11639.37  | 91774.53 |
|                   | 2010 | 73.96 | 64.93 | 9.04  | 4542.90  | 312.22 | 6.83 | 100.00 | 37.18 | 62.82 | 4.29 | 2.54 | 56.99 | 16.45 | 1.47 | 90.80 | 99.40 | 12257.54  | 91813.66 |
|                   | 2011 | 74.16 | 65.01 | 9.15  | 4645.52  | 336.33 | 6.61 | 100.00 | 35.37 | 64.63 | 4.27 | 2.34 | 56.96 | 16.63 | 1.47 | 91.00 | 99.40 | 12645.71  | 91835.55 |
|                   | 2012 | 74.18 | 65.02 | 9.16  | 4620.64  | 318.52 | 6.76 | 100.00 | 34.56 | 65.44 | 4.43 | 2.34 | 56.96 | 16.81 | 1.49 | 91.00 | 99.40 | 12992.25  | 91869.24 |
|                   | 2013 | 74.24 | 65.06 | 9.18  | 4751.90  | 316.14 | 6.07 | 100.00 | 30.78 | 69.22 | 4.20 | 1.87 | 56.98 | 17.03 | 1.50 | 90.90 | 99.40 | -         | 91900.13 |
|                   | 2014 | 74.39 | 65.17 | 9.22  | 4920.22  | 353.93 | 6.48 | 100.00 | 36.67 | 63.33 | 4.10 | 2.37 | 57.03 | 17.33 | 1.51 | 90.90 | 99.40 | -         | 91955.77 |
|                   | 2015 | 74.59 | 65.32 | 9.27  | 5104.78  | -      | -    | -      | -     | -     | -    | -    | 57.10 | 17.73 | 1.52 | 90.90 | 99.40 | -         | 92018.40 |
|                   | 2016 | 74.82 | 65.59 | 9.23  | 5222.83  | -      | -    | -      | -     | -     | -    | -    | 57.20 | 18.29 | -    | -     | -     | -         | 92080.11 |
|                   | 2017 | 76.55 | 66.01 | 10.54 | -        | -      | -    | -      | -     | -     | -    | -    | -     | -     | -    | -     | -     | -         | -        |
| <b>Madagascar</b> | 1995 | 56.85 | 49.83 | 7.03  | 416.94   | 9.55   | 4.07 | 76.80  | 49.57 | 35.46 | 1.44 | 2.62 | 25.80 | 5.80  | 5.98 | 9.90  | 34.00 | 46520.60  | 92044.30 |
|                   | 1996 | 57.19 | 50.13 | 7.06  | 412.81   | 13.00  | 4.52 | 76.76  | 44.22 | 42.39 | 1.91 | 2.60 | 26.06 | 5.81  | 5.91 | 10.00 | 34.80 | 43115.83  | 91958.45 |
|                   | 1997 | 57.47 | 50.38 | 7.09  | 414.77   | 11.83  | 4.78 | 76.82  | 42.31 | 44.93 | 2.15 | 2.63 | 26.32 | 5.80  | 5.84 | 10.00 | 35.60 | 42210.39  | 91876.49 |
|                   | 1998 | 57.79 | 50.67 | 7.12  | 417.67   | 11.40  | 4.51 | 76.65  | 43.31 | 43.50 | 1.96 | 2.55 | 26.59 | 5.79  | 5.75 | 10.10 | 36.40 | 142475.82 | 91795.63 |

|        |       |       |       |        |        |       |       |       |       |       |      |       |       |      |       |       |           |          |          |
|--------|-------|-------|-------|--------|--------|-------|-------|-------|-------|-------|------|-------|-------|------|-------|-------|-----------|----------|----------|
| 1999   | 58.22 | 51.03 | 7.20  | 423.58 | 11.09  | 4.55  | 76.57 | 42.22 | 44.86 | 2.04  | 2.51 | 26.85 | 5.76  | 5.65 | 10.20 | 37.20 | 90964.37  | 91724.72 |          |
| 2000   | 58.45 | 51.22 | 7.23  | 430.11 | 12.51  | 5.08  | 76.57 | 37.79 | 50.65 | 2.57  | 2.51 | 27.12 | 5.72  | 5.55 | 10.30 | 38.00 | 84187.24  | 91659.66 |          |
| 2001   | 58.98 | 51.68 | 7.30  | 442.14 | 14.43  | 5.17  | 76.25 | 34.84 | 54.30 | 2.81  | 2.36 | 27.39 | 5.72  | 5.45 | 10.40 | 38.80 | 131802.60 | 91664.29 |          |
| 2002   | 59.13 | 51.83 | 7.30  | 374.49 | 13.91  | 5.29  | 76.66 | 36.94 | 51.81 | 2.74  | 2.55 | 27.66 | 5.70  | 5.34 | 10.50 | 39.60 | 84561.66  | 91686.51 |          |
| 2003   | 59.32 | 52.01 | 7.31  | 398.90 | 15.28  | 4.81  | 76.66 | 40.66 | 46.96 | 2.26  | 2.55 | 27.94 | 5.67  | 5.24 | 10.60 | 40.40 | 163798.10 | 91714.60 |          |
| 2004   | 59.60 | 52.25 | 7.35  | 407.52 | 12.01  | 4.89  | 78.10 | 39.16 | 49.86 | 2.44  | 2.45 | 28.21 | 5.62  | 5.14 | 10.60 | 41.20 | 87784.42  | 91748.24 |          |
| 2005   | 60.07 | 52.66 | 7.41  | 413.87 | 13.86  | 5.03  | 80.17 | 38.39 | 52.12 | 2.62  | 2.41 | 28.81 | 5.56  | 5.05 | 10.80 | 42.10 | 159818.56 | 91777.76 |          |
| 2006   | 60.40 | 52.98 | 7.42  | 422.14 | 14.98  | 5.11  | 80.08 | 35.94 | 55.12 | 2.82  | 2.29 | 29.43 | 5.52  | 4.96 | 10.90 | 43.10 | 107263.38 | 91813.99 |          |
| 2007   | 60.65 | 53.20 | 7.45  | 435.72 | 18.89  | 4.98  | 80.04 | 54.97 | 54.97 | 2.74  | 2.24 | 30.04 | 5.48  | 4.87 | 11.00 | 44.00 | 134284.87 | 91848.95 |          |
| 2008   | 60.75 | 53.32 | 7.43  | 453.64 | 21.24  | 4.50  | 79.75 | 36.84 | 53.80 | 2.42  | 2.08 | 30.67 | 5.42  | 4.78 | 11.10 | 45.00 | 94468.14  | 91892.31 |          |
| 2009   | 60.75 | 53.34 | 7.41  | 423.31 | 19.61  | 4.70  | 80.12 | 39.07 | 51.23 | 2.41  | 2.29 | 31.30 | 5.35  | 4.69 | 11.20 | 45.90 | 117984.46 | 91938.98 |          |
| 2010   | 60.83 | 53.45 | 7.38  | 412.73 | 20.15  | 4.86  | 86.01 | 39.92 | 53.58 | 2.61  | 2.26 | 31.93 | 5.28  | 4.60 | 11.40 | 46.90 | 117231.04 | 91989.84 |          |
| 2011   | 61.10 | 53.69 | 7.41  | 407.33 | 19.33  | 4.24  | 82.07 | 34.87 | 57.51 | 2.44  | 1.80 | 32.56 | 5.24  | 4.52 | 11.50 | 47.80 | 117586.22 | 91822.63 |          |
| 2012   | 61.35 | 53.94 | 7.41  | 408.34 | 15.38  | 3.46  | 80.46 | 38.18 | 52.55 | 1.82  | 1.64 | 33.20 | 5.18  | 4.44 | 11.60 | 48.70 | 117932.60 | 91688.47 |          |
| 2013   | 61.65 | 54.23 | 7.42  | 406.37 | 19.20  | 4.15  | 80.29 | 30.73 | 61.73 | 2.56  | 1.59 | 33.83 | 5.13  | 4.37 | 11.70 | 49.70 | -         | 91571.78 |          |
| 2014   | 61.95 | 54.51 | 7.43  | 408.66 | 13.67  | 3.04  | 80.23 | 41.36 | 48.45 | 1.47  | 1.57 | 34.47 | 5.10  | 4.30 | 11.90 | 50.60 | -         | 91447.40 |          |
| 2015   | 62.30 | 54.84 | 7.46  | 410.19 | -      | -     | -     | -     | -     | -     | -    | 35.11 | 5.10  | 4.24 | 12.00 | 51.50 | -         | 91338.71 |          |
| 2016   | 62.68 | 55.21 | 7.47  | 416.00 | -      | -     | -     | -     | -     | -     | -    | 35.74 | 5.15  | -    | -     | -     | -         | 91232.83 |          |
| 2017   | 63.51 | 55.45 | 8.06  | -      | -      | -     | -     | -     | -     | -     | -    | -     | -     | -    | -     | -     | -         | -        |          |
| Malawi | 1995  | 45.97 | 40.11 | 5.86   | 364.61 | 7.18  | 5.05  | 46.58 | 29.36 | 36.96 | 1.87 | 3.18  | 13.26 | 5.93 | 6.42  | 31.90 | 52.70     | 8132.45  | 87869.58 |
|        | 1996  | 45.39 | 39.67 | 5.72   | 383.52 | 10.52 | 4.61  | 46.10 | 33.47 | 27.38 | 1.26 | 3.35  | 13.63 | 5.91 | 6.36  | 32.40 | 54.70     | 7698.45  | 87861.63 |
|        | 1997  | 44.99 | 39.36 | 5.64   | 387.63 | 13.37 | 5.15  | 43.69 | 30.12 | 31.07 | 1.60 | 3.55  | 14.00 | 5.87 | 6.31  | 32.90 | 56.80     | 7584.73  | 87868.38 |
|        | 1998  | 44.54 | 38.99 | 5.55   | 390.58 | 9.13  | 5.51  | 39.74 | 26.16 | 34.16 | 1.88 | 3.63  | 14.38 | 5.82 | 6.26  | 33.40 | 58.80     | 17453.98 | 87866.03 |
|        | 1999  | 44.40 | 38.87 | 5.53   | 390.09 | 10.64 | 6.52  | 38.35 | 24.96 | 34.90 | 2.27 | 4.24  | 14.52 | 5.76 | 6.20  | 33.80 | 60.60     | 13768.20 | 87875.28 |
|        | 2000  | 44.72 | 39.11 | 5.61   | 384.68 | 9.45  | 6.07  | 40.47 | 21.95 | 45.78 | 2.78 | 3.29  | 14.61 | 5.68 | 6.15  | 34.30 | 62.50     | 15450.39 | 87877.71 |
|        | 2001  | 45.14 | 39.50 | 5.64   | 355.55 | 7.58  | 5.07  | 42.38 | 23.88 | 43.66 | 2.22 | 2.86  | 14.70 | 5.69 | 6.10  | 34.70 | 64.40     | 12365.35 | 87873.41 |
|        | 2002  | 45.54 | 39.86 | 5.68   | 352.03 | 10.90 | 4.82  | 41.74 | 16.53 | 60.39 | 2.91 | 1.91  | 14.79 | 5.67 | 6.05  | 35.20 | 66.20     | 14272.76 | 87892.72 |
|        | 2003  | 46.21 | 40.44 | 5.76   | 362.37 | 12.73 | 6.35  | 42.33 | 11.80 | 72.13 | 4.58 | 1.77  | 14.88 | 5.65 | 6.00  | 35.60 | 68.10     | 20340.81 | 87893.91 |
|        | 2004  | 46.81 | 40.96 | 5.85   | 371.79 | 16.54 | 7.82  | 35.08 | 9.42  | 73.14 | 5.72 | 2.10  | 14.96 | 5.62 | 5.96  | 36.10 | 70.00     | 15083.16 | 87899.58 |

|      |       |       |      |        |       |       |       |       |       |      |      |       |      |      |       |       |          |          |
|------|-------|-------|------|--------|-------|-------|-------|-------|-------|------|------|-------|------|------|-------|-------|----------|----------|
| 2005 | 47.61 | 41.62 | 5.99 | 373.23 | 17.73 | 8.20  | 33.86 | 8.82  | 73.96 | 6.07 | 2.14 | 15.05 | 5.59 | 5.90 | 36.50 | 71.80 | 20503.21 | 87917.73 |
| 2006 | 48.45 | 42.41 | 6.04 | 379.44 | 21.38 | 8.99  | 28.30 | 8.80  | 68.89 | 6.19 | 2.80 | 15.14 | 5.62 | 5.83 | 37.00 | 73.70 | 15055.37 | 87887.80 |
| 2007 | 49.46 | 43.32 | 6.15 | 403.49 | 25.17 | 9.31  | 22.28 | 47.42 | 47.42 | 4.42 | 4.90 | 15.24 | 5.64 | 5.73 | 37.40 | 75.50 | 17520.18 | 87852.36 |
| 2008 | 50.57 | 44.29 | 6.28 | 421.23 | 32.90 | 10.70 | 24.11 | 10.37 | 56.99 | 6.10 | 4.60 | 15.33 | 5.66 | 5.61 | 37.90 | 77.40 | 17735.30 | 87819.24 |
| 2009 | 51.80 | 45.36 | 6.45 | 442.56 | 35.73 | 10.18 | 28.65 | 11.24 | 60.78 | 6.19 | 3.99 | 15.43 | 5.68 | 5.47 | 38.30 | 79.20 | 15595.83 | 87788.81 |
| 2010 | 53.03 | 46.40 | 6.63 | 458.87 | 36.72 | 10.05 | 27.53 | 10.16 | 63.11 | 6.34 | 3.71 | 15.54 | 5.70 | 5.31 | 38.80 | 81.00 | 21415.54 | 87772.29 |
| 2011 | 54.47 | 47.70 | 6.76 | 466.96 | 43.14 | 11.67 | 20.16 | 8.18  | 59.40 | 6.93 | 4.74 | 15.66 | 5.73 | 5.15 | 39.20 | 82.90 | 21525.76 | 87679.09 |
| 2012 | 56.04 | 49.10 | 6.95 | 461.89 | 32.56 | 12.06 | 23.34 | 10.24 | 56.12 | 6.77 | 5.29 | 15.80 | 5.76 | 4.99 | 39.70 | 84.70 | 21632.13 | 87594.32 |
| 2013 | 57.42 | 50.30 | 7.12 | 471.84 | 26.29 | 10.96 | 23.34 | 11.00 | 52.85 | 5.79 | 5.17 | 15.94 | 5.78 | 4.86 | 40.10 | 86.50 | -        | 87512.11 |
| 2014 | 58.44 | 51.21 | 7.24 | 484.37 | 29.02 | 11.38 | 22.49 | 10.64 | 52.72 | 6.00 | 5.38 | 16.10 | 5.77 | 4.74 | 40.60 | 88.40 | -        | 87453.80 |
| 2015 | 59.37 | 52.01 | 7.36 | 483.63 | -     | -     | -     | -     | -     | -    | -    | 16.27 | 5.74 | 4.65 | 41.00 | 90.20 | -        | 87413.75 |
| 2016 | 60.18 | 52.71 | 7.46 | 481.45 | -     | -     | -     | -     | -     | -    | -    | 16.45 | 5.69 | -    | -     | -     | -        | 87380.43 |
| 2017 | 63.21 | 55.03 | 8.18 | -      | -     | -     | -     | -     | -     | -    | -    | -     | -    | -    | -     | -     | -        | -        |

|          |      |       |       |      |         |        |      |       |       |       |      |      |       |      |      |       |       |           |          |
|----------|------|-------|-------|------|---------|--------|------|-------|-------|-------|------|------|-------|------|------|-------|-------|-----------|----------|
| Malaysia | 1995 | 72.27 | 63.76 | 8.51 | 6275.12 | 127.04 | 2.96 | 74.98 | 32.64 | 56.46 | 1.67 | 1.29 | 55.69 | 6.27 | 3.31 | 88.80 | 92.20 | 252184.59 | 85211.80 |
|          | 1996 | 72.43 | 63.91 | 8.52 | 6729.52 | 139.11 | 2.93 | 74.98 | 31.69 | 57.73 | 1.69 | 1.24 | 56.97 | 6.27 | 3.24 | 89.30 | 92.60 | 240005.00 | 85258.58 |
|          | 1997 | 72.61 | 64.06 | 8.55 | 7040.79 | 125.14 | 2.72 | 74.98 | 33.60 | 55.18 | 1.50 | 1.22 | 58.24 | 6.24 | 3.15 | 89.80 | 93.00 | 245919.39 | 85344.55 |
|          | 1998 | 72.73 | 64.18 | 8.56 | 6360.95 | 94.49  | 2.93 | 74.07 | 32.99 | 55.46 | 1.62 | 1.30 | 59.50 | 6.22 | 3.04 | 90.20 | 93.30 | 259140.17 | 85447.55 |
|          | 1999 | 72.84 | 64.27 | 8.56 | 6589.60 | 104.83 | 3.03 | 74.28 | 33.08 | 55.47 | 1.68 | 1.35 | 60.74 | 6.21 | 2.91 | 90.70 | 93.70 | 160190.90 | 85521.45 |
|          | 2000 | 73.01 | 64.45 | 8.57 | 7009.60 | 121.62 | 3.04 | 76.29 | 33.75 | 55.76 | 1.69 | 1.34 | 61.98 | 6.23 | 2.78 | 91.20 | 94.10 | 171393.52 | 85629.03 |
|          | 2001 | 73.18 | 64.58 | 8.60 | 6893.28 | 131.78 | 3.40 | 73.76 | 30.55 | 58.59 | 1.99 | 1.41 | 62.92 | 6.38 | 2.66 | 91.60 | 94.40 | 176214.37 | 85730.64 |
|          | 2002 | 73.29 | 64.67 | 8.62 | 7114.82 | 140.65 | 3.40 | 73.83 | 31.34 | 57.56 | 1.96 | 1.44 | 63.86 | 6.51 | 2.54 | 92.10 | 94.80 | 199983.48 | 85883.22 |
|          | 2003 | 73.45 | 64.79 | 8.66 | 7377.31 | 175.21 | 3.95 | 75.06 | 30.22 | 59.74 | 2.36 | 1.59 | 64.78 | 6.61 | 2.44 | 92.50 | 95.10 | 195386.72 | 86022.35 |
|          | 2004 | 73.66 | 64.95 | 8.72 | 7725.85 | 184.42 | 3.74 | 77.34 | 33.60 | 56.56 | 2.12 | 1.63 | 65.69 | 6.68 | 2.36 | 92.90 | 95.40 | 216283.73 | 86160.50 |
|          | 2005 | 73.84 | 65.09 | 8.74 | 7983.89 | 183.16 | 3.29 | 78.29 | 38.08 | 51.36 | 1.69 | 1.60 | 66.59 | 6.76 | 2.29 | 93.40 | 95.70 | 246665.16 | 86330.07 |
|          | 2006 | 73.98 | 65.22 | 8.76 | 8273.66 | 226.37 | 3.65 | 79.25 | 35.62 | 55.05 | 2.01 | 1.64 | 67.48 | 6.94 | 2.25 | 93.80 | 96.10 | 240375.43 | 86418.98 |
|          | 2007 | 74.08 | 65.27 | 8.81 | 8889.68 | 261.07 | 3.61 | 78.43 | 54.41 | 54.41 | 1.96 | 1.64 | 68.36 | 7.10 | 2.22 | 94.20 | 96.40 | 250680.68 | 86481.94 |
|          | 2008 | 74.19 | 65.34 | 8.84 | 9020.40 | 294.59 | 3.47 | 78.54 | 34.72 | 55.79 | 1.94 | 1.53 | 69.23 | 7.22 | 2.19 | 94.60 | 96.70 | 256755.87 | 86536.45 |
|          | 2009 | 74.29 | 65.40 | 8.88 | 8635.12 | 290.62 | 3.97 | 76.33 | 31.45 | 58.79 | 2.34 | 1.64 | 70.08 | 7.29 | 2.17 | 95.00 | 97.00 | 277979.42 | 86591.10 |
|          | 2010 | 74.41 | 65.50 | 8.91 | 9071.36 | 351.28 | 3.99 | 76.80 | 32.80 | 57.29 | 2.29 | 1.70 | 70.91 | 7.35 | 2.15 | 95.40 | 97.30 | 263676.11 | 86658.06 |

|          |      |       |       |       |          |         |       |       |       |       |       |      |       |      |      |       |       |           |          |
|----------|------|-------|-------|-------|----------|---------|-------|-------|-------|-------|-------|------|-------|------|------|-------|-------|-----------|----------|
|          | 2011 | 74.53 | 65.59 | 8.95  | 9377.19  | 393.67  | 3.89  | 77.84 | 35.08 | 54.94 | 2.14  | 1.75 | 71.74 | 7.53 | 2.13 | 95.70 | 97.70 | 271818.84 | 86601.19 |
|          | 2012 | 74.67 | 65.70 | 8.97  | 9708.94  | 421.51  | 4.01  | 77.97 | 34.91 | 55.22 | 2.22  | 1.80 | 72.53 | 7.74 | 2.11 | 95.90 | 97.90 | 279098.38 | 86569.02 |
|          | 2013 | 74.85 | 65.84 | 9.01  | 9981.15  | 427.05  | 4.02  | 79.95 | 36.11 | 54.83 | 2.20  | 1.81 | 73.28 | 7.98 | 2.09 | 96.00 | 98.00 | -         | 86566.61 |
|          | 2014 | 75.05 | 66.00 | 9.05  | 10398.23 | 455.83  | 4.17  | 78.75 | 35.30 | 55.18 | 2.30  | 1.87 | 74.01 | 8.22 | 2.07 | 96.00 | 98.20 | -         | 86586.90 |
|          | 2015 | 75.32 | 66.20 | 9.12  | 10745.05 | -       | -     | -     | -     | -     | -     | -    | 74.71 | 8.48 | 2.06 | 96.00 | 98.20 | -         | 86618.92 |
|          | 2016 | 75.56 | 66.42 | 9.14  | 11031.82 | -       | -     | -     | -     | -     | -     | -    | 75.37 | 8.77 | -    | -     | -     | -         | 86665.38 |
|          | 2017 | 74.72 | 65.97 | 8.75  | -        | -       | -     | -     | -     | -     | -     | -    | -     | -    | -    | -     | -     | -         | -        |
| Maldives | 1995 | 67.85 | 59.11 | 8.74  | -        | 94.59   | 6.02  | 36.08 | 14.14 | 60.80 | 3.66  | 2.36 | 25.64 | 6.00 | 4.30 | 69.70 | 93.50 | 343.53    | 89805.01 |
|          | 1996 | 68.80 | 59.97 | 8.83  | -        | 110.51  | 6.37  | 47.70 | 20.73 | 56.55 | 3.60  | 2.77 | 26.01 | 6.13 | 3.98 | 71.70 | 93.80 | 344.68    | 89800.03 |
|          | 1997 | 69.78 | 60.82 | 8.96  | -        | 122.46  | 6.39  | 47.04 | 20.94 | 55.49 | 3.54  | 2.84 | 26.38 | 6.25 | 3.67 | 73.70 | 94.20 | 337.75    | 89809.67 |
|          | 1998 | 70.65 | 61.59 | 9.06  | -        | 150.12  | 7.51  | 49.43 | 18.85 | 61.88 | 4.65  | 2.86 | 26.76 | 6.38 | 3.40 | 75.60 | 94.50 | 351.80    | 89826.72 |
|          | 1999 | 71.34 | 62.20 | 9.14  | -        | 157.79  | 7.37  | 44.55 | 15.86 | 64.40 | 4.75  | 2.63 | 27.13 | 6.50 | 3.16 | 77.50 | 94.80 | -         | 89880.83 |
|          | 2000 | 72.12 | 62.90 | 9.22  | -        | 178.05  | 8.00  | 52.70 | 18.96 | 64.02 | 5.12  | 2.88 | 27.71 | 6.62 | 2.94 | 79.40 | 95.20 | -         | 89946.79 |
|          | 2001 | 72.79 | 63.49 | 9.30  | 2209.74  | 180.93  | 5.84  | 56.43 | 20.67 | 63.38 | 3.70  | 2.14 | 28.86 | 6.65 | 2.77 | 81.50 | 95.50 | -         | 89991.80 |
|          | 2002 | 73.46 | 64.08 | 9.38  | 2289.71  | 181.37  | 5.78  | 59.42 | 22.73 | 61.75 | 3.57  | 2.21 | 30.04 | 6.67 | 2.63 | 83.50 | 95.90 | -         | 90041.69 |
|          | 2003 | 74.24 | 64.75 | 9.49  | 6245.22  | 208.58  | 5.90  | 63.43 | 22.79 | 64.07 | 3.78  | 2.12 | 31.25 | 6.69 | 2.51 | 85.40 | 96.20 | -         | 90099.27 |
|          | 2004 | 73.70 | 64.56 | 9.14  | 6452.25  | 236.05  | 5.89  | 67.96 | 23.22 | 65.84 | 3.88  | 2.01 | 32.49 | 6.69 | 2.42 | 87.30 | 96.60 | -         | 90132.44 |
|          | 2005 | 75.66 | 65.99 | 9.66  | 5447.97  | 349.73  | 9.52  | 71.78 | 18.07 | 74.82 | 7.13  | 2.40 | 33.75 | 6.67 | 2.34 | 89.10 | 96.90 | -         | 90159.43 |
|          | 2006 | 76.26 | 66.50 | 9.77  | 6622.93  | 350.47  | 7.37  | 71.82 | 20.78 | 71.06 | 5.24  | 2.13 | 35.03 | 6.65 | 2.29 | 90.90 | 97.20 | -         | 90157.68 |
|          | 2007 | 77.00 | 67.04 | 9.97  | 6806.77  | 367.53  | 6.64  | 72.66 | 68.56 | 68.56 | 4.55  | 2.09 | 36.30 | 6.61 | 2.26 | 92.60 | 97.50 | -         | 90141.91 |
|          | 2008 | 77.51 | 67.45 | 10.06 | 7184.78  | 613.81  | 9.30  | 74.81 | 18.32 | 75.51 | 7.03  | 2.28 | 37.55 | 6.55 | 2.24 | 94.20 | 97.80 | -         | 90118.27 |
|          | 2009 | 77.70 | 67.64 | 10.06 | 6702.44  | 611.23  | 9.22  | 78.18 | 21.11 | 73.00 | 6.73  | 2.49 | 38.78 | 6.48 | 2.24 | 95.80 | 98.10 | -         | 90100.91 |
|          | 2010 | 77.80 | 67.81 | 9.99  | 7052.25  | 556.11  | 7.93  | 79.43 | 26.60 | 66.51 | 5.27  | 2.66 | 39.98 | 6.39 | 2.23 | 97.30 | 98.30 | -         | 90108.40 |
|          | 2011 | 78.15 | 68.04 | 10.10 | 7453.31  | 589.64  | 8.11  | 81.67 | 25.22 | 69.12 | 5.61  | 2.51 | 41.16 | 6.22 | 2.22 | 98.00 | 98.60 | -         | 90101.20 |
|          | 2012 | 78.42 | 68.28 | 10.14 | 7482.17  | 673.56  | 9.16  | 82.83 | 24.05 | 70.96 | 6.50  | 2.66 | 42.30 | 6.05 | 2.21 | 98.00 | 98.60 | -         | 90104.54 |
|          | 2013 | 78.64 | 68.47 | 10.17 | 7863.55  | 860.15  | 11.16 | 83.10 | 21.59 | 74.02 | 8.26  | 2.90 | 43.42 | 5.89 | 2.19 | 98.00 | 98.60 | -         | 90148.50 |
|          | 2014 | 78.94 | 68.72 | 10.22 | 8271.54  | 1165.13 | 13.73 | 84.26 | 18.26 | 78.33 | 10.76 | 2.98 | 44.49 | 5.76 | 2.17 | 98.00 | 98.60 | -         | 90195.44 |
|          | 2015 | 79.16 | 68.92 | 10.24 | 8288.59  | -       | -     | -     | -     | -     | -     | -    | 45.54 | 5.66 | 2.13 | 97.90 | 98.60 | -         | 90255.94 |
|          | 2016 | 79.32 | 69.13 | 10.20 | 8623.87  | -       | -     | -     | -     | -     | -     | -    | 46.54 | 5.66 | -    | -     | -     | -         | 90329.32 |

|              |      |       |       |       |          |        |      |       |       |       |      |      |       |       |      |        |        |          |          |
|--------------|------|-------|-------|-------|----------|--------|------|-------|-------|-------|------|------|-------|-------|------|--------|--------|----------|----------|
|              | 2017 | 81.45 | 71.12 | 10.33 | -        | -      | -    | -     | -     | -     | -    | -    | -     | -     | -    | -      | -      | -        | -        |
| <b>Mali</b>  | 1995 | 51.18 | 44.07 | 7.11  | 495.70   | 14.69  | 5.03 | 99.96 | 47.72 | 52.26 | 2.63 | 2.40 | 25.52 | 7.34  | 7.06 | 16.00  | 36.80  | 31483.01 | 87293.27 |
|              | 1996 | 51.46 | 44.33 | 7.13  | 517.09   | 22.00  | 7.56 | 99.98 | 60.41 | 39.58 | 2.99 | 4.57 | 25.98 | 7.23  | 7.02 | 16.30  | 38.70  | 31338.26 | 87235.87 |
|              | 1997 | 52.01 | 44.81 | 7.19  | 528.27   | 18.60  | 6.86 | 99.98 | 63.87 | 36.12 | 2.48 | 4.38 | 26.43 | 7.09  | 6.98 | 16.70  | 40.60  | 32233.05 | 87163.87 |
|              | 1998 | 50.95 | 43.95 | 7.00  | 553.67   | 17.34  | 6.20 | 99.98 | 65.53 | 34.45 | 2.14 | 4.06 | 26.95 | 6.94  | 6.95 | 17.10  | 42.60  | 86412.25 | 87104.32 |
|              | 1999 | 53.32 | 45.92 | 7.40  | 569.70   | 16.55  | 6.05 | 99.68 | 69.69 | 30.08 | 1.82 | 4.23 | 27.65 | 6.76  | 6.92 | 17.50  | 44.60  | 78429.02 | 87073.97 |
|              | 2000 | 53.27 | 45.91 | 7.36  | 553.58   | 15.13  | 6.29 | 99.10 | 66.50 | 32.89 | 2.07 | 4.22 | 28.36 | 6.57  | 6.90 | 18.00  | 46.60  | 70241.63 | 87030.88 |
|              | 2001 | 53.83 | 46.43 | 7.40  | 620.28   | 16.96  | 6.39 | 99.95 | 55.04 | 44.93 | 2.87 | 3.52 | 29.08 | 6.44  | 6.88 | 18.40  | 48.60  | 84085.49 | 86990.51 |
|              | 2002 | 54.35 | 46.89 | 7.46  | 620.56   | 17.18  | 6.32 | 99.63 | 59.59 | 40.19 | 2.54 | 3.78 | 29.81 | 6.29  | 6.86 | 18.90  | 50.60  | 79829.52 | 86932.02 |
|              | 2003 | 55.12 | 47.53 | 7.59  | 656.49   | 21.83  | 6.25 | 98.60 | 55.10 | 44.11 | 2.76 | 3.49 | 30.55 | 6.13  | 6.84 | 19.30  | 52.70  | 67302.87 | 86907.44 |
|              | 2004 | 55.80 | 48.11 | 7.69  | 645.92   | 25.08  | 6.28 | 99.46 | 50.49 | 49.23 | 3.09 | 3.19 | 31.30 | 5.97  | 6.82 | 19.70  | 54.70  | 88391.55 | 86883.48 |
|              | 2005 | 56.50 | 48.72 | 7.78  | 666.26   | 26.98  | 6.34 | 99.53 | 51.80 | 47.96 | 3.04 | 3.30 | 32.06 | 5.83  | 6.79 | 20.20  | 56.70  | 87079.09 | 86875.66 |
|              | 2006 | 57.05 | 49.25 | 7.80  | 674.74   | 30.16  | 6.56 | 99.55 | 51.49 | 48.27 | 3.16 | 3.39 | 32.83 | 5.78  | 6.76 | 20.60  | 58.70  | 83577.39 | 86861.38 |
|              | 2007 | 57.67 | 49.80 | 7.87  | 675.41   | 36.21  | 6.97 | 99.58 | 48.28 | 48.28 | 3.37 | 3.61 | 33.61 | 5.74  | 6.72 | 21.10  | 60.80  | 74744.40 | 86855.65 |
|              | 2008 | 58.34 | 50.40 | 7.94  | 684.49   | 41.39  | 6.74 | 99.30 | 53.08 | 46.54 | 3.14 | 3.60 | 34.40 | 5.69  | 6.67 | 21.50  | 62.80  | 86890.41 | 86855.00 |
|              | 2009 | 58.94 | 50.95 | 8.00  | 693.55   | 41.78  | 6.85 | 99.29 | 53.64 | 45.97 | 3.15 | 3.70 | 35.20 | 5.62  | 6.61 | 22.00  | 64.80  | 74104.27 | 86852.53 |
|              | 2010 | 59.44 | 51.42 | 8.01  | 708.37   | 39.46  | 6.35 | 97.93 | 54.65 | 44.20 | 2.81 | 3.54 | 36.00 | 5.51  | 6.55 | 22.40  | 66.90  | 76827.88 | 86878.25 |
|              | 2011 | 59.95 | 51.88 | 8.07  | 709.40   | 45.61  | 6.59 | 92.42 | 50.13 | 45.76 | 3.02 | 3.57 | 36.79 | 5.47  | 6.47 | 22.90  | 68.90  | 77134.18 | 86849.49 |
|              | 2012 | 60.31 | 52.24 | 8.08  | 683.00   | 43.17  | 6.47 | 75.90 | 49.48 | 34.81 | 2.25 | 4.22 | 37.58 | 5.39  | 6.40 | 23.30  | 70.90  | 77437.93 | 86817.70 |
|              | 2013 | 60.49 | 52.42 | 8.06  | 678.76   | 43.87  | 6.58 | 61.50 | 50.90 | 17.24 | 1.13 | 5.44 | 38.36 | 5.29  | 6.32 | 23.80  | 73.00  | -        | 86804.27 |
|              | 2014 | 60.88 | 52.79 | 8.09  | 705.79   | 47.77  | 6.86 | 61.77 | 47.66 | 22.85 | 1.57 | 5.29 | 39.14 | 5.20  | 6.23 | 24.20  | 75.00  | -        | 86781.90 |
|              | 2015 | 61.34 | 53.21 | 8.13  | 726.25   | -      | -    | -     | -     | -     | -    | -    | 39.92 | 5.12  | 6.15 | 24.70  | 77.00  | -        | 86796.58 |
|              | 2016 | 61.84 | 53.69 | 8.15  | 745.87   | -      | -    | -     | -     | -     | -    | -    | 40.68 | 5.09  | -    | -      | -      | -        | 86789.50 |
|              | 2017 | 61.95 | 53.12 | 8.83  | -        | -      | -    | -     | -     | -     | -    | -    | -     | -     | -    | -      | -      | -        | -        |
| <b>Malta</b> | 1995 | 77.12 | 67.50 | 9.63  | 14736.88 | 609.64 | 5.66 | 87.68 | 28.47 | 67.53 | 3.82 | 1.84 | 90.95 | 17.14 | 1.81 | 100.00 | 99.90  | 2710.72  | 91082.10 |
|              | 1996 | 77.32 | 67.67 | 9.65  | 15193.46 | 664.18 | 6.07 | 88.05 | 28.53 | 67.60 | 4.11 | 1.97 | 91.18 | 17.31 | 2.03 | 100.00 | 99.90  | 2659.97  | 91143.09 |
|              | 1997 | 77.39 | 67.74 | 9.65  | 15871.61 | 644.73 | 6.25 | 88.06 | 26.25 | 70.19 | 4.38 | 1.86 | 91.49 | 17.49 | 1.98 | 100.00 | 99.90  | 2835.19  | 91230.20 |
|              | 1998 | 77.41 | 67.77 | 9.64  | 16577.03 | 691.34 | 6.45 | 89.88 | 27.91 | 68.94 | 4.44 | 2.00 | 91.79 | 17.67 | 1.88 | 100.00 | 100.00 | 2742.62  | 91348.04 |
|              | 1999 | 77.37 | 67.74 | 9.63  | 17256.85 | 689.69 | 6.43 | 92.94 | 29.44 | 68.32 | 4.39 | 2.04 | 92.09 | 17.85 | 1.77 | 100.00 | 100.00 | 2781.48  | 91465.48 |

|      |       |       |       |          |         |      |       |       |       |      |      |       |       |      |        |        |         |          |
|------|-------|-------|-------|----------|---------|------|-------|-------|-------|------|------|-------|-------|------|--------|--------|---------|----------|
| 2000 | 77.51 | 67.84 | 9.67  | 18306.67 | 686.93  | 6.83 | 92.91 | 28.41 | 69.42 | 4.74 | 2.09 | 92.37 | 18.02 | 1.70 | 100.00 | 100.00 | 2553.05 | 91605.81 |
| 2001 | 77.82 | 68.10 | 9.72  | 18280.21 | 694.68  | 7.11 | 91.69 | 29.39 | 67.95 | 4.83 | 2.28 | 92.64 | 18.31 | 1.48 | 100.00 | 100.00 | 3049.25 | 91781.96 |
| 2002 | 78.17 | 68.37 | 9.81  | 18685.66 | 851.07  | 7.86 | 90.79 | 28.07 | 69.09 | 5.43 | 2.43 | 92.91 | 18.62 | 1.45 | 100.00 | 100.00 | 2551.86 | 91954.58 |
| 2003 | 78.62 | 68.71 | 9.90  | 19035.36 | 1092.51 | 8.06 | 90.49 | 28.24 | 68.79 | 5.54 | 2.51 | 93.16 | 18.96 | 1.48 | 100.00 | 100.00 | 2955.31 | 92095.73 |
| 2004 | 78.94 | 68.95 | 9.98  | 18991.78 | 1280.23 | 8.46 | 82.74 | 27.46 | 66.81 | 5.65 | 2.81 | 93.41 | 19.32 | 1.40 | 100.00 | 100.00 | 3020.01 | 92226.78 |
| 2005 | 79.27 | 69.20 | 10.07 | 19585.12 | 1407.70 | 8.83 | 89.64 | 28.78 | 67.89 | 6.00 | 2.84 | 93.65 | 19.70 | 1.38 | 100.00 | 100.00 | 3166.97 | 92369.23 |
| 2006 | 79.51 | 69.40 | 10.12 | 19870.75 | 1495.37 | 8.93 | 91.47 | 29.56 | 67.69 | 6.05 | 2.89 | 93.88 | 20.03 | 1.36 | 100.00 | 100.00 | 3056.58 | 92453.48 |
| 2007 | 79.66 | 69.50 | 10.15 | 20590.95 | 1628.07 | 8.36 | 90.52 | 65.60 | 65.60 | 5.48 | 2.87 | 94.09 | 20.37 | 1.35 | 100.00 | 100.00 | 3227.64 | 92519.60 |
| 2008 | 79.81 | 69.61 | 10.20 | 21142.02 | 1805.92 | 8.15 | 89.09 | 32.75 | 63.24 | 5.16 | 3.00 | 94.30 | 20.84 | 1.43 | 100.00 | 100.00 | -       | 92578.38 |
| 2009 | 80.10 | 69.83 | 10.26 | 20466.56 | 1739.74 | 8.33 | 86.33 | 31.93 | 63.01 | 5.25 | 3.08 | 94.49 | 21.52 | 1.42 | 100.00 | 100.00 | -       | 92651.45 |
| 2010 | 80.32 | 69.99 | 10.33 | 21087.79 | 1753.89 | 8.30 | 88.54 | 32.85 | 62.89 | 5.22 | 3.08 | 94.67 | 22.45 | 1.36 | 100.00 | 100.00 | -       | 92721.87 |
| 2011 | 80.48 | 70.14 | 10.34 | 21296.26 | 2222.48 | 9.60 | 92.32 | 30.17 | 67.32 | 6.46 | 3.14 | 94.83 | 23.18 | 1.45 | 100.00 | 100.00 | -       | 92763.13 |
| 2012 | 80.72 | 70.34 | 10.38 | 21685.29 | 2216.60 | 9.95 | 89.45 | 29.90 | 66.58 | 6.63 | 3.33 | 94.99 | 24.11 | 1.43 | 100.00 | 100.00 | -       | 92825.54 |
| 2013 | 81.02 | 70.58 | 10.44 | 22471.64 | 2389.08 | 9.89 | 89.80 | 30.30 | 66.26 | 6.55 | 3.34 | 95.14 | 25.19 | 1.38 | 100.00 | 100.00 | -       | 92899.70 |
| 2014 | 81.25 | 70.77 | 10.48 | 24080.23 | 2470.60 | 9.75 | 93.59 | 28.86 | 69.16 | 6.74 | 3.01 | 95.28 | 26.30 | 1.42 | 100.00 | 100.00 | -       | 92962.49 |
| 2015 | 81.35 | 70.85 | 10.49 | 25511.47 | -       | -    | -     | -     | -     | -    | -    | 95.41 | 27.32 | 1.42 | 100.00 | 100.00 | -       | 93017.64 |
| 2016 | 81.43 | 70.93 | 10.50 | 26606.31 | -       | -    | -     | -     | -     | -    | -    | 95.53 | 28.41 | -    | -      | -      | -       | 93087.81 |
| 2017 | 80.99 | 69.82 | 11.18 | -        | -       | -    | -     | -     | -     | -    | -    | -     | -     | -    | -      | -      | -       | -        |

|          |      |       |       |      |         |        |       |       |       |       |       |      |       |   |      |       |       |   |          |
|----------|------|-------|-------|------|---------|--------|-------|-------|-------|-------|-------|------|-------|---|------|-------|-------|---|----------|
| Marshall | 1995 | 64.36 | 56.10 | 8.27 | 3175.88 | 712.67 | 30.83 | 75.20 | 6.78  | 90.98 | 28.05 | 2.78 | 66.73 | - | -    | 67.40 | 92.50 | - | 85334.47 |
| Islands  | 1996 | 64.26 | 56.00 | 8.26 | 2827.28 | 411.94 | 19.47 | 75.20 | 10.78 | 85.67 | 16.68 | 2.79 | 67.06 | - | -    | 67.90 | 92.70 | - | 85271.75 |
|          | 1997 | 64.00 | 55.77 | 8.23 | 2630.15 | 407.61 | 19.88 | 75.20 | 10.26 | 86.36 | 17.17 | 2.71 | 67.39 | - | -    | 68.50 | 92.80 | - | 85228.22 |
|          | 1998 | 63.82 | 55.61 | 8.21 | 2543.88 | 384.74 | 18.33 | 75.20 | 11.00 | 85.37 | 15.65 | 2.68 | 67.71 | - | -    | 69.00 | 92.90 | - | 85209.06 |
|          | 1999 | 63.62 | 55.43 | 8.20 | 2475.56 | 374.43 | 18.05 | 75.20 | 10.94 | 85.45 | 15.43 | 2.63 | 68.04 | - | 5.71 | 69.50 | 93.00 | - | 85242.62 |
|          | 2000 | 63.21 | 55.04 | 8.17 | 2617.37 | 465.62 | 21.88 | 75.20 | 9.07  | 87.93 | 19.24 | 2.64 | 68.36 | - | -    | 70.10 | 93.10 | - | 85325.12 |
|          | 2001 | 63.33 | 55.15 | 8.17 | 2756.48 | 411.94 | 18.69 | 75.20 | 10.54 | 85.98 | 16.07 | 2.62 | 68.67 | - | -    | 70.60 | 93.20 | - | 85419.23 |
|          | 2002 | 63.26 | 55.10 | 8.16 | 2829.94 | 418.01 | 17.44 | 75.20 | 11.24 | 85.05 | 14.84 | 2.61 | 68.99 | - | -    | 71.10 | 93.40 | - | 85563.85 |
|          | 2003 | 63.20 | 55.04 | 8.15 | 2837.04 | 411.08 | 16.87 | 75.20 | 11.85 | 84.25 | 14.21 | 2.66 | 69.30 | - | -    | 71.60 | 93.50 | - | 85706.03 |
|          | 2004 | 63.13 | 54.98 | 8.15 | 2842.69 | 448.80 | 17.84 | 75.20 | 11.59 | 84.59 | 15.09 | 2.75 | 69.60 | - | -    | 72.10 | 93.60 | - | 85845.40 |
|          | 2005 | 63.06 | 54.92 | 8.15 | 2926.64 | 461.92 | 17.43 | 75.20 | 11.85 | 84.24 | 14.68 | 2.75 | 69.90 | - | 4.50 | 72.70 | 93.70 | - | 85969.12 |

|      |       |       |      |         |        |       |       |       |       |       |      |       |   |      |       |       |   |          |
|------|-------|-------|------|---------|--------|-------|-------|-------|-------|-------|------|-------|---|------|-------|-------|---|----------|
| 2006 | 62.97 | 54.86 | 8.11 | 2967.37 | 547.46 | 19.80 | 75.20 | 10.42 | 86.14 | 17.06 | 2.74 | 70.20 | - | 4.50 | 73.20 | 93.80 | - | 86053.05 |
| 2007 | 63.14 | 55.00 | 8.14 | 3072.29 | 587.55 | 20.42 | 75.20 | 86.14 | 86.14 | 17.59 | 2.83 | 70.49 | - | 4.50 | 73.70 | 93.90 | - | 86120.88 |
| 2008 | 63.29 | 55.12 | 8.17 | 3017.07 | 569.32 | 19.43 | 75.20 | 11.42 | 84.82 | 16.48 | 2.95 | 70.78 | - | -    | 74.20 | 94.10 | - | 86211.57 |
| 2009 | 63.46 | 55.25 | 8.21 | 2961.93 | 551.37 | 18.98 | 75.20 | 11.69 | 84.46 | 16.03 | 2.95 | 71.06 | - | -    | 74.70 | 94.20 | - | 86293.21 |
| 2010 | 63.64 | 55.39 | 8.25 | 3146.76 | 542.26 | 17.34 | 75.20 | 12.74 | 83.06 | 14.40 | 2.94 | 71.34 | - | -    | 75.20 | 94.30 | - | 86391.85 |
| 2011 | 63.83 | 55.54 | 8.28 | 3177.64 | 566.00 | 17.19 | 75.20 | 12.77 | 83.02 | 14.27 | 2.92 | 71.62 | - | 4.05 | 75.70 | 94.40 | - | 86497.32 |
| 2012 | 64.02 | 55.70 | 8.32 | 3279.96 | 582.62 | 16.68 | 75.20 | 12.49 | 83.40 | 13.91 | 2.77 | 71.89 | - | -    | 76.20 | 94.50 | - | 86653.60 |
| 2013 | 64.21 | 55.85 | 8.36 | 3365.47 | 623.75 | 17.24 | 75.20 | 11.72 | 84.42 | 14.55 | 2.69 | 72.16 | - | -    | 76.70 | 94.60 | - | 86784.13 |
| 2014 | 64.38 | 55.98 | 8.40 | 3333.36 | 625.20 | 17.14 | 75.20 | 11.79 | 84.32 | 14.45 | 2.69 | 72.42 | - | -    | 76.80 | 94.60 | - | 86933.61 |
| 2015 | 64.59 | 56.14 | 8.45 | 3315.19 | -      | -     | -     | -     | -     | -     | -    | 72.68 | - | -    | 76.90 | 94.60 | - | 87092.57 |
| 2016 | 64.92 | 56.40 | 8.51 | 3373.95 | -      | -     | -     | -     | -     | -     | -    | 72.94 | - | -    | -     | -     | - | 87354.68 |
| 2017 | 64.54 | 56.41 | 8.13 | -       | -      | -     | -     | -     | -     | -     | -    | -     | - | -    | -     | -     | - | -        |

|            |      |       |       |      |         |       |      |       |       |       |      |      |       |      |      |       |       |          |          |
|------------|------|-------|-------|------|---------|-------|------|-------|-------|-------|------|------|-------|------|------|-------|-------|----------|----------|
| Mauritania | 1995 | 61.55 | 53.46 | 8.09 | 1038.26 | 28.18 | 4.65 | 94.70 | 49.26 | 47.99 | 2.23 | 2.42 | 45.25 | 6.05 | 5.77 | 18.20 | 35.70 | 8039.71  | 88529.46 |
|            | 1996 | 61.69 | 53.60 | 8.08 | 1066.52 | 22.45 | 3.74 | 94.70 | 61.05 | 35.53 | 1.33 | 2.41 | 46.05 | 6.03 | 5.70 | 19.30 | 37.00 | 8251.86  | 88546.10 |
|            | 1997 | 62.25 | 54.08 | 8.17 | 992.60  | 22.15 | 3.91 | 94.70 | 58.58 | 38.14 | 1.49 | 2.42 | 46.85 | 6.01 | 5.64 | 20.40 | 38.20 | 8692.80  | 88580.53 |
|            | 1998 | 62.61 | 54.39 | 8.22 | 989.10  | 24.91 | 4.62 | 94.73 | 51.99 | 45.11 | 2.08 | 2.54 | 47.64 | 5.97 | 5.58 | 21.50 | 39.50 | 9423.20  | 88604.03 |
|            | 1999 | 63.13 | 54.81 | 8.31 | 1033.14 | 28.50 | 5.33 | 94.70 | 43.16 | 54.42 | 2.90 | 2.43 | 48.44 | 5.93 | 5.51 | 22.60 | 40.80 | 9840.51  | 88636.06 |
|            | 2000 | 63.57 | 55.19 | 8.38 | 998.11  | 25.08 | 5.26 | 94.72 | 44.78 | 52.72 | 2.77 | 2.48 | 49.24 | 5.89 | 5.45 | 23.70 | 42.00 | 11950.56 | 88676.17 |
|            | 2001 | 63.90 | 55.47 | 8.43 | 988.47  | 20.09 | 4.34 | 94.71 | 53.67 | 43.33 | 1.88 | 2.46 | 50.04 | 5.87 | 5.39 | 24.80 | 43.30 | 11586.06 | 88684.24 |
|            | 2002 | 64.41 | 55.90 | 8.51 | 966.47  | 24.38 | 5.31 | 94.71 | 43.67 | 53.89 | 2.86 | 2.45 | 50.83 | 5.84 | 5.34 | 26.00 | 44.60 | 10019.58 | 88710.70 |
|            | 2003 | 64.86 | 56.28 | 8.58 | 995.19  | 23.79 | 4.53 | 94.68 | 49.12 | 48.12 | 2.18 | 2.35 | 51.61 | 5.80 | 5.28 | 27.20 | 45.80 | 10307.28 | 88733.52 |
|            | 2004 | 65.21 | 56.59 | 8.62 | 1022.75 | 28.11 | 4.70 | 94.65 | 45.07 | 52.38 | 2.46 | 2.24 | 52.38 | 5.76 | 5.23 | 28.40 | 47.00 | 11027.64 | 88758.19 |
|            | 2005 | 65.56 | 56.90 | 8.66 | 1083.20 | 29.13 | 4.21 | 94.62 | 48.88 | 48.34 | 2.03 | 2.17 | 53.13 | 5.72 | 5.18 | 29.50 | 48.30 | 11475.54 | 88787.94 |
|            | 2006 | 66.27 | 57.53 | 8.75 | 1251.63 | 30.09 | 3.21 | 94.45 | 51.82 | 45.13 | 1.45 | 1.76 | 53.87 | 5.70 | 5.14 | 30.80 | 49.50 | 11509.78 | 88760.98 |
|            | 2007 | 66.78 | 57.94 | 8.83 | 1251.15 | 35.66 | 3.54 | 94.51 | 46.72 | 46.72 | 1.65 | 1.88 | 54.59 | 5.68 | 5.10 | 32.00 | 50.70 | 13429.12 | 88736.59 |
|            | 2008 | 67.26 | 58.37 | 8.88 | 1229.45 | 38.09 | 3.23 | 94.50 | 54.83 | 41.98 | 1.35 | 1.87 | 55.30 | 5.64 | 5.06 | 33.20 | 51.90 | 11721.45 | 88719.31 |
|            | 2009 | 67.66 | 58.74 | 8.93 | 1182.38 | 39.61 | 3.79 | 93.07 | 48.84 | 47.52 | 1.80 | 1.99 | 56.00 | 5.61 | 5.02 | 34.40 | 53.10 | 11967.58 | 88718.49 |
|            | 2010 | 68.11 | 59.16 | 8.95 | 1203.38 | 39.61 | 3.28 | 91.96 | 49.30 | 46.38 | 1.52 | 1.76 | 56.68 | 5.58 | 4.98 | 35.70 | 54.30 | 12951.01 | 88727.43 |
|            | 2011 | 68.49 | 59.47 | 9.02 | 1223.34 | 39.92 | 2.87 | 85.74 | 47.52 | 44.57 | 1.28 | 1.59 | 57.35 | 5.55 | 4.94 | 36.90 | 55.50 | 13153.86 | 88758.72 |



|         |      |       |       |      |         |        |       |       |       |       |      |      |       |       |      |       |       |           |          |
|---------|------|-------|-------|------|---------|--------|-------|-------|-------|-------|------|------|-------|-------|------|-------|-------|-----------|----------|
| Mexico  | 1995 | 72.85 | 63.98 | 8.86 | 7307.18 | 172.44 | 5.06  | 97.04 | 56.15 | 42.13 | 2.13 | 2.93 | 73.37 | 7.85  | 3.02 | 70.70 | 85.60 | 515961.21 | 85455.85 |
|         | 1996 | 73.22 | 64.31 | 8.91 | 7603.71 | 179.25 | 4.59  | 96.63 | 56.62 | 41.41 | 1.90 | 2.69 | 73.67 | 7.94  | 2.95 | 71.50 | 86.20 | 532804.43 | 85476.64 |
|         | 1997 | 73.46 | 64.54 | 8.92 | 7999.86 | 218.92 | 4.72  | 95.98 | 53.07 | 44.71 | 2.11 | 2.61 | 73.93 | 8.04  | 2.88 | 72.30 | 86.80 | 539136.34 | 85521.49 |
|         | 1998 | 73.71 | 64.76 | 8.95 | 8245.49 | 230.92 | 4.80  | 95.94 | 51.79 | 46.02 | 2.21 | 2.59 | 74.19 | 8.14  | 2.82 | 73.10 | 87.40 | 692323.18 | 85582.12 |
|         | 1999 | 74.13 | 65.12 | 9.01 | 8340.56 | 271.48 | 5.01  | 95.86 | 50.03 | 47.81 | 2.39 | 2.61 | 74.44 | 8.23  | 2.77 | 73.90 | 88.00 | 553847.34 | 85657.63 |
|         | 2000 | 74.61 | 65.53 | 9.08 | 8659.80 | 322.09 | 4.98  | 95.33 | 50.94 | 46.56 | 2.32 | 2.66 | 74.72 | 8.31  | 2.72 | 74.70 | 88.60 | 576489.52 | 85766.67 |
|         | 2001 | 74.87 | 65.75 | 9.12 | 8494.84 | 366.31 | 5.35  | 95.00 | 52.43 | 44.81 | 2.40 | 2.95 | 75.05 | 8.37  | 2.67 | 75.50 | 89.20 | 547960.58 | 85891.68 |
|         | 2002 | 74.89 | 65.81 | 9.08 | 8401.02 | 389.26 | 5.52  | 94.83 | 53.23 | 43.87 | 2.42 | 3.10 | 75.37 | 8.43  | 2.62 | 76.30 | 89.70 | 567679.66 | 86036.01 |
|         | 2003 | 74.93 | 65.87 | 9.05 | 8416.90 | 412.98 | 6.02  | 95.08 | 54.96 | 42.20 | 2.54 | 3.48 | 75.68 | 8.48  | 2.58 | 77.10 | 90.30 | 601685.72 | 86190.27 |
|         | 2004 | 75.22 | 66.12 | 9.09 | 8667.29 | 446.92 | 6.11  | 94.89 | 53.15 | 43.99 | 2.69 | 3.42 | 76.00 | 8.54  | 2.54 | 77.80 | 90.90 | 567790.06 | 86356.02 |
|         | 2005 | 75.21 | 66.16 | 9.05 | 8808.56 | 490.72 | 6.04  | 94.37 | 53.48 | 43.33 | 2.62 | 3.43 | 76.31 | 8.63  | 2.50 | 78.60 | 91.40 | 641308.82 | 86539.88 |
|         | 2006 | 75.46 | 66.36 | 9.10 | 9108.07 | 522.31 | 5.83  | 93.90 | 52.68 | 43.90 | 2.56 | 3.27 | 76.62 | 8.72  | 2.46 | 79.40 | 92.00 | 642137.77 | 86691.11 |
|         | 2007 | 75.66 | 66.49 | 9.17 | 9253.32 | 565.53 | 5.92  | 93.33 | 44.67 | 44.67 | 2.64 | 3.27 | 76.92 | 8.83  | 2.42 | 80.10 | 92.50 | 646318.66 | 86858.50 |
|         | 2008 | 75.44 | 66.32 | 9.11 | 9232.20 | 603.92 | 6.06  | 93.21 | 50.75 | 45.55 | 2.76 | 3.30 | 77.23 | 8.95  | 2.39 | 80.90 | 93.00 | 644167.96 | 87035.80 |
|         | 2009 | 75.35 | 66.25 | 9.10 | 8657.84 | 526.08 | 6.60  | 92.58 | 49.12 | 46.94 | 3.10 | 3.50 | 77.53 | 9.06  | 2.36 | 81.60 | 93.60 | 648860.08 | 87218.17 |
|         | 2010 | 75.44 | 66.34 | 9.10 | 8959.58 | 591.71 | 6.39  | 92.28 | 47.50 | 48.53 | 3.10 | 3.29 | 77.83 | 9.17  | 2.34 | 82.30 | 94.10 | 643375.43 | 87408.41 |
|         | 2011 | 75.72 | 66.53 | 9.19 | 9183.33 | 615.10 | 6.04  | 91.47 | 45.05 | 50.75 | 3.07 | 2.98 | 78.12 | 9.28  | 2.32 | 83.00 | 94.60 | 652861.29 | 87499.65 |
|         | 2012 | 75.88 | 66.65 | 9.23 | 9414.91 | 633.09 | 6.21  | 91.57 | 45.00 | 50.86 | 3.16 | 3.05 | 78.41 | 9.37  | 2.30 | 83.70 | 95.10 | 663424.95 | 87606.43 |
|         | 2013 | 75.79 | 66.59 | 9.20 | 9409.97 | 673.81 | 6.30  | 91.22 | 44.00 | 51.74 | 3.26 | 3.04 | 78.69 | 9.48  | 2.27 | 84.40 | 95.60 | -         | 87719.30 |
|         | 2014 | 75.90 | 66.68 | 9.23 | 9492.99 | 677.19 | 6.30  | 91.22 | 44.00 | 51.77 | 3.26 | 3.04 | 78.97 | 9.62  | 2.24 | 85.10 | 96.10 | -         | 87836.95 |
|         | 2015 | 76.19 | 66.89 | 9.30 | 9615.31 | -      | -     | -     | -     | -     | -    | -    | 79.25 | 9.81  | 2.22 | 85.20 | 96.10 | -         | 87969.26 |
|         | 2016 | 76.38 | 67.06 | 9.32 | 9707.91 | -      | -     | -     | -     | -     | -    | -    | 79.52 | 10.05 | -    | -     | -     | -         | 88103.38 |
|         | 2017 | 75.14 | 65.97 | 9.16 | -       | -      | -     | -     | -     | -     | -    | -    | -     | -     | -    | -     | -     | -         | -        |
| Moldova | 1995 | 64.61 | 56.82 | 7.79 | 1086.94 | 30.04  | 9.06  | 76.41 | 27.35 | 64.21 | 5.82 | 3.24 | 46.29 | 13.99 | 1.90 | 71.70 | 84.20 | 16651.89  | 91219.73 |
|         | 1996 | 65.34 | 57.45 | 7.90 | 1025.11 | 40.16  | 10.27 | 79.10 | 27.43 | 65.33 | 6.71 | 3.56 | 46.20 | 14.17 | 1.81 | 71.60 | 84.20 | 16914.86  | 91422.93 |
|         | 1997 | 67.10 | 58.84 | 8.26 | 1045.85 | 42.22  | 9.45  | 78.93 | 28.20 | 64.27 | 6.08 | 3.38 | 46.10 | 14.22 | 1.72 | 71.90 | 84.40 | 15739.98  | 91635.11 |
|         | 1998 | 67.71 | 59.34 | 8.37 | 977.82  | 35.72  | 7.69  | 83.11 | 36.37 | 56.23 | 4.32 | 3.36 | 46.00 | 14.19 | 1.62 | 72.10 | 84.60 | 14206.27  | 91842.74 |
|         | 1999 | 67.54 | 59.24 | 8.30 | 946.37  | 18.89  | 5.89  | 86.25 | 43.72 | 49.31 | 2.90 | 2.98 | 45.90 | 14.13 | 1.53 | 72.40 | 84.80 | 11858.89  | 92056.05 |
|         | 2000 | 67.62 | 59.35 | 8.28 | 968.29  | 23.45  | 6.65  | 83.34 | 42.88 | 48.55 | 3.23 | 3.42 | 45.80 | 14.04 | 1.44 | 72.70 | 85.10 | 10796.14  | 92256.67 |

|      |       |       |      |         |        |       |       |       |       |      |      |       |       |      |       |       |          |          |
|------|-------|-------|------|---------|--------|-------|-------|-------|-------|------|------|-------|-------|------|-------|-------|----------|----------|
| 2001 | 68.19 | 59.84 | 8.35 | 1029.65 | 28.47  | 7.00  | 85.47 | 46.29 | 45.85 | 3.21 | 3.79 | 45.70 | 14.09 | 1.35 | 72.90 | 85.30 | 11371.92 | 92346.65 |
| 2002 | 68.54 | 60.17 | 8.37 | 1112.54 | 38.01  | 8.31  | 80.63 | 41.44 | 48.61 | 4.04 | 4.27 | 45.61 | 14.13 | 1.29 | 73.20 | 85.50 | 11279.53 | 92423.57 |
| 2003 | 68.80 | 60.42 | 8.38 | 1189.31 | 45.21  | 8.24  | 79.48 | 41.19 | 48.17 | 3.97 | 4.27 | 45.51 | 14.12 | 1.25 | 73.40 | 85.70 | 11996.30 | 92491.46 |
| 2004 | 69.17 | 60.74 | 8.44 | 1280.49 | 61.25  | 8.49  | 79.56 | 40.35 | 49.28 | 4.18 | 4.30 | 45.41 | 14.04 | 1.22 | 73.70 | 86.00 | 12302.82 | 92532.60 |
| 2005 | 68.55 | 60.30 | 8.25 | 1379.88 | 75.85  | 9.15  | 82.12 | 44.65 | 45.62 | 4.18 | 4.98 | 45.31 | 13.87 | 1.22 | 73.90 | 86.20 | 12762.86 | 92557.53 |
| 2006 | 68.94 | 60.62 | 8.33 | 1450.13 | 100.81 | 10.63 | 82.92 | 46.10 | 44.41 | 4.72 | 5.91 | 45.21 | 13.95 | 1.23 | 74.20 | 86.40 | 12243.80 | 92548.88 |
| 2007 | 69.22 | 60.79 | 8.42 | 1497.10 | 134.27 | 10.88 | 83.33 | 45.20 | 45.20 | 4.92 | 5.96 | 45.11 | 13.97 | 1.24 | 74.50 | 86.70 | 12163.98 | 92542.15 |
| 2008 | 69.60 | 61.08 | 8.51 | 1616.95 | 193.76 | 11.41 | 85.41 | 45.07 | 47.22 | 5.39 | 6.02 | 45.01 | 13.95 | 1.26 | 74.70 | 86.90 | 11170.17 | 92529.13 |
| 2009 | 69.89 | 61.30 | 8.59 | 1521.86 | 189.05 | 12.49 | 84.82 | 43.67 | 48.52 | 6.06 | 6.43 | 44.94 | 13.90 | 1.27 | 75.00 | 87.10 | 11008.69 | 92534.03 |
| 2010 | 69.72 | 61.22 | 8.50 | 1631.54 | 196.83 | 12.08 | 82.75 | 44.25 | 46.53 | 5.62 | 6.46 | 44.89 | 13.84 | 1.27 | 75.30 | 87.40 | 11338.71 | 92547.81 |
| 2011 | 71.49 | 62.55 | 8.95 | 1743.49 | 209.53 | 10.61 | 80.98 | 40.44 | 50.06 | 5.31 | 5.30 | 44.86 | 13.78 | 1.27 | 75.50 | 87.60 | 11433.49 | 92554.05 |
| 2012 | 71.64 | 62.68 | 8.96 | 1731.51 | 242.63 | 11.87 | 83.55 | 44.72 | 46.47 | 5.52 | 6.36 | 44.86 | 13.62 | 1.27 | 75.80 | 87.90 | 11350.63 | 92557.98 |
| 2013 | 72.53 | 63.36 | 9.17 | 1894.78 | 224.74 | 10.05 | 80.61 | 40.27 | 50.04 | 5.03 | 5.02 | 44.88 | 13.42 | 1.26 | 76.10 | 88.10 | -        | 92557.97 |
| 2014 | 72.23 | 63.14 | 9.09 | 1986.94 | 228.85 | 10.32 | 78.95 | 38.39 | 51.38 | 5.30 | 5.02 | 44.93 | 13.29 | 1.26 | 76.40 | 88.40 | -        | 92567.60 |
| 2015 | 72.12 | 63.07 | 9.05 | 1980.27 | -      | -     | -     | -     | -     | -    | -    | 45.00 | 13.37 | 1.25 | 76.40 | 88.40 | -        | 92575.14 |
| 2016 | 72.25 | 63.28 | 8.97 | 2062.68 | -      | -     | -     | -     | -     | -    | -    | 45.09 | 13.96 | -    | -     | -     | -        | 92591.86 |
| 2017 | 72.90 | 63.00 | 9.89 | -       | -      | -     | -     | -     | -     | -    | -    | -     | -     | -    | -     | -     | -        | -        |

|          |      |       |       |      |         |       |      |       |       |       |      |      |       |      |      |       |       |          |          |
|----------|------|-------|-------|------|---------|-------|------|-------|-------|-------|------|------|-------|------|------|-------|-------|----------|----------|
| Mongolia | 1995 | 61.63 | 54.58 | 7.05 | 1459.11 | 19.91 | 3.15 | 66.18 | 11.60 | 82.47 | 2.60 | 0.55 | 56.81 | 6.60 | 2.74 | 46.00 | 53.70 | 59119.42 | 88656.56 |
|          | 1996 | 61.46 | 54.48 | 6.98 | 1479.79 | 20.61 | 3.55 | 77.53 | 11.25 | 85.49 | 3.03 | 0.51 | 56.76 | 6.53 | 2.57 | 45.90 | 54.20 | 60763.25 | 88803.04 |
|          | 1997 | 61.64 | 54.65 | 6.99 | 1524.86 | 18.44 | 3.65 | 63.14 | 10.10 | 84.00 | 3.06 | 0.58 | 56.71 | 6.44 | 2.43 | 46.50 | 54.60 | 60760.15 | 88942.81 |
|          | 1998 | 61.91 | 54.89 | 7.02 | 1562.48 | 19.28 | 4.04 | 71.59 | 9.89  | 86.19 | 3.48 | 0.56 | 56.67 | 6.33 | 2.31 | 47.00 | 55.10 | 50019.83 | 89089.32 |
|          | 1999 | 62.33 | 55.24 | 7.09 | 1596.51 | 17.97 | 4.04 | 64.18 | 9.88  | 84.61 | 3.42 | 0.62 | 56.62 | 6.18 | 2.22 | 47.50 | 55.60 | 30732.31 | 89228.99 |
|          | 2000 | 62.70 | 55.53 | 7.17 | 1600.48 | 23.35 | 4.92 | 74.75 | 16.62 | 77.76 | 3.83 | 1.09 | 57.13 | 6.00 | 2.14 | 48.20 | 56.30 | 51756.46 | 89398.58 |
|          | 2001 | 62.99 | 55.78 | 7.21 | 1632.52 | 28.58 | 5.45 | 84.53 | 24.10 | 71.49 | 3.90 | 1.56 | 58.22 | 5.94 | 2.10 | 49.20 | 57.20 | 27501.30 | 89493.28 |
|          | 2002 | 63.18 | 55.96 | 7.22 | 1693.08 | 33.22 | 5.81 | 90.85 | 36.84 | 59.45 | 3.46 | 2.36 | 59.30 | 5.85 | 2.08 | 50.10 | 58.00 | 50488.32 | 89601.71 |
|          | 2003 | 63.30 | 56.05 | 7.25 | 1792.87 | 39.93 | 6.18 | 95.31 | 50.30 | 47.22 | 2.92 | 3.26 | 60.38 | 5.75 | 2.08 | 51.00 | 58.80 | 39185.71 | 89701.44 |
|          | 2004 | 63.46 | 56.18 | 7.28 | 1961.49 | 47.83 | 5.99 | 93.70 | 47.95 | 48.82 | 2.93 | 3.07 | 61.44 | 5.64 | 2.11 | 51.90 | 59.60 | 25435.53 | 89770.71 |
|          | 2005 | 63.72 | 56.41 | 7.31 | 2079.11 | 50.80 | 5.09 | 94.03 | 48.09 | 48.85 | 2.48 | 2.60 | 62.49 | 5.53 | 2.17 | 52.70 | 60.20 | 27669.27 | 89821.87 |
|          | 2006 | 64.24 | 56.83 | 7.41 | 2229.15 | 62.40 | 4.68 | 92.01 | 44.84 | 51.26 | 2.40 | 2.28 | 63.54 | 5.53 | 2.24 | 53.50 | 60.90 | 37790.42 | 89793.18 |

|            |       |       |       |         |         |        |        |        |       |       |      |       |       |       |       |       |          |          |
|------------|-------|-------|-------|---------|---------|--------|--------|--------|-------|-------|------|-------|-------|-------|-------|-------|----------|----------|
| 2007       | 64.86 | 57.27 | 7.59  | 2425.68 | 82.71   | 5.06   | 92.59  | 54.04  | 54.04 | 2.74  | 2.33 | 64.56 | 5.53  | 2.33  | 54.30 | 61.50 | 55403.60 | 89734.39 |
| 2008       | 65.41 | 57.69 | 7.72  | 2604.93 | 119.26  | 5.58   | 94.04  | 40.36  | 57.08 | 3.18  | 2.39 | 65.58 | 5.54  | 2.43  | 55.10 | 62.00 | 46513.80 | 89653.89 |
| 2009       | 65.73 | 57.93 | 7.80  | 2533.18 | 90.83   | 5.29   | 94.21  | 44.91  | 52.33 | 2.77  | 2.52 | 66.58 | 5.53  | 2.54  | 55.80 | 62.50 | 50237.02 | 89564.37 |
| 2010       | 65.99 | 58.17 | 7.82  | 2650.35 | 124.49  | 4.70   | 93.13  | 40.50  | 56.52 | 2.65  | 2.04 | 67.57 | 5.51  | 2.64  | 56.50 | 62.90 | 24860.38 | 89486.92 |
| 2011       | 66.38 | 58.44 | 7.94  | 3053.61 | 168.06  | 4.45   | 92.47  | 38.59  | 58.27 | 2.60  | 1.86 | 68.54 | 5.55  | 2.72  | 57.20 | 63.30 | -        | 89351.45 |
| 2012       | 66.85 | 58.81 | 8.04  | 3365.57 | 184.71  | 4.22   | 93.23  | 43.29  | 53.57 | 2.26  | 1.96 | 69.47 | 5.59  | 2.77  | 57.90 | 63.70 | -        | 89221.92 |
| 2013       | 67.37 | 59.22 | 8.15  | 3685.75 | 184.79  | 4.21   | 93.29  | 44.30  | 52.51 | 2.21  | 2.00 | 70.37 | 5.63  | 2.81  | 58.50 | 64.00 | -        | 89100.60 |
| 2014       | 67.85 | 59.59 | 8.27  | 3901.87 | 195.33  | 4.73   | 93.35  | 41.63  | 55.40 | 2.62  | 2.11 | 71.22 | 5.68  | 2.81  | 59.10 | 64.20 | -        | 89009.87 |
| 2015       | 68.00 | 59.72 | 8.28  | 3923.63 | -       | -      | -      | -      | -     | -     | -    | 72.04 | 5.77  | 2.79  | 59.70 | 64.40 | -        | 88927.92 |
| 2016       | 68.12 | 59.91 | 8.21  | 3906.12 | -       | -      | -      | -      | -     | -     | -    | 72.82 | 5.91  | -     | -     | -     | -        | 88898.36 |
| 2017       | 68.94 | 60.25 | 8.69  | -       | -       | -      | -      | -      | -     | -     | -    | -     | -     | -     | -     | -     | -        | -        |
| Montenegro | 1995  | 73.95 | 64.69 | 9.26    | 139.21  | 7.42   | 100.00 | 29.97  | 70.03 | 5.20  | 2.22 | 53.37 | 14.67 | 1.98  | -     | -     | -        | 91114.90 |
|            | 1996  | 73.82 | 64.62 | 9.20    | 102.39  | 7.43   | 100.00 | 30.10  | 69.90 | 5.20  | 2.24 | 54.41 | 15.19 | 1.95  | -     | -     | -        | 91172.73 |
|            | 1997  | 73.73 | 64.55 | 9.18    | 5014.11 | 101.86 | 7.40   | 100.00 | 29.82 | 70.18 | 5.20 | 2.21  | 55.45 | 15.71 | 1.93  | -     | -        | 91259.35 |
|            | 1998  | 73.64 | 64.49 | 9.15    | 5275.88 | 104.13 | 7.42   | 100.00 | 29.97 | 70.03 | 5.20 | 2.22  | 56.49 | 16.23 | 1.91  | 89.10 | 97.10    | 91347.40 |
|            | 1999  | 73.62 | 64.47 | 9.15    | 4793.05 | 101.78 | 7.48   | 100.00 | 30.50 | 69.50 | 5.20 | 2.28  | 57.52 | 16.74 | 1.89  | 89.20 | 97.10    | 91439.83 |
|            | 2000  | 73.82 | 64.61 | 9.20    | 4950.22 | 117.38 | 7.32   | 100.00 | 28.98 | 71.02 | 5.20 | 2.12  | 58.54 | 17.27 | 1.88  | 89.20 | 97.10    | 91555.07 |
|            | 2001  | 74.00 | 64.78 | 9.23    | 4984.58 | 155.63 | 8.23   | 100.00 | 27.60 | 72.40 | 5.96 | 2.27  | 59.56 | 17.82 | 1.87  | 89.30 | 97.20    | 91584.12 |
|            | 2002  | 74.28 | 64.99 | 9.29    | 5058.97 | 174.68 | 8.33   | 100.00 | 29.42 | 70.58 | 5.88 | 2.45  | 60.57 | 18.37 | 1.86  | 89.30 | 97.20    | 91613.62 |
|            | 2003  | 74.52 | 65.19 | 9.34    | 5164.79 | 247.80 | 8.91   | 100.00 | 25.23 | 74.77 | 6.66 | 2.25  | 61.57 | 18.89 | 1.85  | 89.80 | 97.50    | 91660.78 |
|            | 2004  | 74.75 | 65.36 | 9.39    | 5382.49 | 285.18 | 8.45   | 100.00 | 26.23 | 73.77 | 6.23 | 2.22  | 62.02 | 19.31 | 1.85  | 90.40 | 97.70    | 91701.48 |
|            | 2005  | 75.00 | 65.57 | 9.43    | 5599.89 | 310.00 | 8.46   | 100.00 | 28.83 | 71.17 | 6.02 | 2.44  | 62.20 | 19.57 | 1.84  | 90.90 | 97.90    | 91743.42 |
|            | 2006  | 75.27 | 65.78 | 9.49    | 6072.03 | 350.14 | 8.01   | 100.00 | 29.94 | 70.06 | 5.61 | 2.40  | 62.38 | 19.60 | 1.83  | 91.40 | 98.10    | 91728.82 |
|            | 2007  | 75.63 | 66.01 | 9.62    | 6709.91 | 400.37 | 6.74   | 100.00 | 67.45 | 67.45 | 4.55 | 2.19  | 62.56 | 19.50 | 1.82  | 91.90 | 98.30    | 91707.28 |
|            | 2008  | 76.00 | 66.28 | 9.71    | 6932.07 | 449.18 | 6.13   | 100.00 | 34.92 | 65.08 | 3.99 | 2.14  | 62.74 | 19.33 | 1.81  | 92.50 | 98.50    | 91688.63 |
|            | 2009  | 76.21 | 66.44 | 9.78    | 6516.36 | 406.79 | 6.07   | 100.00 | 40.51 | 59.49 | 3.61 | 2.46  | 62.92 | 19.19 | 1.79  | 93.00 | 98.70    | 91687.26 |
|            | 2010  | 76.36 | 66.58 | 9.78    | 6682.28 | 456.63 | 6.90   | 100.00 | 39.53 | 60.47 | 4.17 | 2.73  | 63.10 | 19.13 | 1.77  | 93.50 | 98.90    | 91714.03 |
|            | 2011  | 76.43 | 66.62 | 9.81    | 6890.77 | 500.42 | 6.92   | 100.00 | 39.54 | 60.46 | 4.19 | 2.74  | 63.27 | 19.26 | 1.75  | 94.00 | 99.10    | 91729.24 |
|            | 2012  | 76.54 | 66.72 | 9.82    | 6697.45 | 470.00 | 7.25   | 100.00 | 38.29 | 61.71 | 4.47 | 2.78  | 63.46 | 19.44 | 1.73  | 94.60 | 99.30    | 91752.08 |

|            |      |       |       |       |         |        |      |        |       |       |      |      |       |       |      |       |       |          |          |
|------------|------|-------|-------|-------|---------|--------|------|--------|-------|-------|------|------|-------|-------|------|-------|-------|----------|----------|
|            | 2013 | 76.67 | 66.82 | 9.85  | 6928.37 | 454.49 | 6.43 | 100.00 | 42.12 | 57.88 | 3.72 | 2.71 | 63.64 | 19.69 | 1.71 | 95.10 | 99.40 | -        | 91772.76 |
|            | 2014 | 76.81 | 66.92 | 9.88  | 7045.12 | 457.66 | 6.42 | 100.00 | 42.84 | 57.16 | 3.67 | 2.75 | 63.83 | 20.05 | 1.69 | 95.60 | 99.60 | -        | 91798.19 |
|            | 2015 | 76.93 | 67.01 | 9.92  | 7279.89 | -      | -    | -      | -     | -     | -    | -    | 64.03 | 20.54 | 1.68 | 95.90 | 99.70 | -        | 91826.13 |
|            | 2016 | 77.04 | 67.13 | 9.91  | 7487.11 | -      | -    | -      | -     | -     | -    | -    | 64.22 | 21.20 | -    | -     | -     | -        | 91861.69 |
|            | 2017 | 76.49 | 65.98 | 10.51 | -       | -      | -    | -      | -     | -     | -    | -    | -     | -     | -    | -     | -     | -        | -        |
| Morocco    | 1995 | 69.01 | 58.92 | 10.09 | 1722.19 | 48.23  | 3.55 | 77.81  | 51.89 | 33.31 | 1.18 | 2.37 | 51.69 | 8.06  | 3.30 | 58.80 | 75.80 | 41902.28 | 90150.87 |
|            | 1996 | 69.52 | 59.35 | 10.17 | 1907.79 | 51.82  | 3.49 | 77.47  | 52.07 | 32.78 | 1.14 | 2.34 | 52.02 | 8.22  | 3.16 | 59.80 | 76.40 | 42078.66 | 90238.50 |
|            | 1997 | 69.82 | 59.61 | 10.22 | 1853.01 | 49.59  | 3.71 | 77.13  | 54.82 | 28.93 | 1.07 | 2.64 | 52.35 | 8.34  | 3.04 | 60.90 | 76.90 | 43941.60 | 90355.16 |
|            | 1998 | 70.23 | 59.94 | 10.30 | 1962.03 | 55.38  | 3.92 | 76.79  | 53.66 | 30.12 | 1.18 | 2.74 | 52.68 | 8.43  | 2.93 | 61.90 | 77.30 | 45637.61 | 90478.51 |
|            | 1999 | 70.54 | 60.18 | 10.36 | 1958.95 | 55.31  | 3.99 | 76.68  | 54.57 | 28.84 | 1.15 | 2.84 | 53.01 | 8.51  | 2.85 | 62.90 | 77.80 | 48246.34 | 90599.84 |
|            | 2000 | 70.90 | 60.46 | 10.43 | 1972.30 | 53.46  | 4.18 | 76.58  | 54.05 | 29.42 | 1.23 | 2.95 | 53.34 | 8.59  | 2.78 | 64.00 | 78.30 | 50974.38 | 90745.32 |
|            | 2001 | 71.22 | 60.73 | 10.48 | 2091.23 | 57.24  | 4.44 | 76.41  | 51.83 | 32.17 | 1.43 | 3.01 | 53.66 | 8.68  | 2.72 | 65.00 | 78.80 | 53556.27 | 90870.53 |
|            | 2002 | 71.47 | 60.96 | 10.51 | 2130.73 | 72.64  | 5.31 | 81.74  | 60.51 | 25.97 | 1.38 | 3.93 | 53.99 | 8.77  | 2.68 | 66.00 | 79.30 | 53925.24 | 90986.93 |
|            | 2003 | 71.73 | 61.18 | 10.55 | 2230.90 | 87.77  | 5.25 | 81.66  | 59.97 | 26.56 | 1.39 | 3.86 | 54.32 | 8.87  | 2.64 | 66.90 | 79.80 | 54270.64 | 91108.21 |
|            | 2004 | 71.95 | 61.37 | 10.58 | 2310.34 | 98.70  | 5.22 | 81.38  | 59.07 | 27.41 | 1.43 | 3.79 | 54.64 | 8.96  | 2.61 | 67.90 | 80.30 | 65993.20 | 91248.24 |
|            | 2005 | 72.24 | 61.63 | 10.61 | 2358.44 | 99.08  | 5.06 | 83.48  | 59.73 | 28.45 | 1.44 | 3.62 | 55.13 | 9.06  | 2.59 | 68.90 | 80.80 | 70022.09 | 91397.36 |
|            | 2006 | 72.50 | 61.85 | 10.65 | 2507.67 | 111.94 | 5.23 | 86.25  | 58.00 | 32.76 | 1.71 | 3.52 | 55.64 | 9.13  | 2.57 | 69.90 | 81.40 | 71423.41 | 91514.16 |
|            | 2007 | 72.76 | 62.02 | 10.73 | 2566.22 | 132.81 | 5.48 | 87.39  | 34.67 | 34.67 | 1.90 | 3.58 | 56.15 | 9.21  | 2.56 | 70.90 | 81.90 | 73113.44 | 91635.87 |
|            | 2008 | 73.03 | 62.24 | 10.79 | 2686.23 | 153.51 | 5.41 | 87.26  | 56.77 | 34.94 | 1.89 | 3.52 | 56.67 | 9.28  | 2.56 | 71.90 | 82.50 | 72650.85 | 91751.93 |
|            | 2009 | 73.31 | 62.45 | 10.86 | 2765.86 | 162.40 | 5.67 | 87.81  | 56.10 | 36.12 | 2.05 | 3.62 | 57.18 | 9.34  | 2.57 | 72.90 | 83.00 | 72152.21 | 91876.99 |
|            | 2010 | 73.57 | 62.67 | 10.90 | 2834.20 | 165.63 | 5.86 | 88.34  | 57.16 | 35.29 | 2.07 | 3.79 | 57.68 | 9.39  | 2.58 | 73.80 | 83.50 | 76087.38 | 91993.81 |
|            | 2011 | 73.83 | 62.87 | 10.96 | 2942.04 | 182.64 | 5.99 | 88.34  | 57.54 | 34.86 | 2.09 | 3.90 | 58.19 | 9.40  | 2.58 | 74.70 | 84.00 | 78381.40 | 92066.39 |
|            | 2012 | 74.10 | 63.12 | 10.98 | 2987.32 | 178.72 | 6.15 | 88.34  | 56.99 | 35.49 | 2.18 | 3.97 | 58.70 | 9.40  | 2.58 | 75.60 | 84.60 | 80436.72 | 92150.27 |
|            | 2013 | 74.35 | 63.34 | 11.01 | 3077.32 | 184.23 | 5.94 | 88.34  | 59.20 | 32.98 | 1.96 | 3.98 | 59.20 | 9.43  | 2.57 | 76.50 | 85.10 | -        | 92225.76 |
|            | 2014 | 74.57 | 63.54 | 11.03 | 3110.21 | 190.05 | 5.91 | 88.34  | 58.41 | 33.88 | 2.00 | 3.91 | 59.70 | 9.52  | 2.56 | 76.60 | 85.30 | -        | 92295.61 |
|            | 2015 | 74.79 | 63.73 | 11.06 | 3204.75 | -      | -    | -      | -     | -     | -    | -    | 60.20 | 9.70  | 2.53 | 76.70 | 85.40 | -        | 92377.64 |
|            | 2016 | 75.00 | 63.97 | 11.03 | 3196.04 | -      | -    | -      | -     | -     | -    | -    | 60.69 | 9.95  | -    | -     | -     | -        | 92453.75 |
|            | 2017 | 73.97 | 63.15 | 10.83 | -       | -      | -    | -      | -     | -     | -    | -    | -     | -     | -    | -     | -     | -        | -        |
| Mozambique | 1995 | 51.27 | 44.46 | 6.82  | 170.58  | 7.63   | 5.30 | 36.59  | 13.14 | 64.09 | 3.40 | 1.90 | 27.50 | 5.74  | 5.96 | 11.50 | 37.00 | 36851.04 | 89374.51 |

|      |       |       |      |        |       |      |       |       |       |      |      |       |      |      |       |       |           |          |
|------|-------|-------|------|--------|-------|------|-------|-------|-------|------|------|-------|------|------|-------|-------|-----------|----------|
| 1996 | 51.28 | 44.49 | 6.79 | 209.86 | 8.46  | 4.28 | 41.52 | 16.33 | 60.67 | 2.60 | 1.68 | 28.01 | 5.80 | 5.92 | 12.10 | 37.90 | 31666.11  | 89298.21 |
| 1997 | 51.23 | 44.47 | 6.76 | 226.30 | 10.46 | 4.63 | 39.77 | 14.39 | 63.83 | 2.96 | 1.68 | 28.54 | 5.84 | 5.88 | 12.60 | 38.90 | 30429.45  | 89231.12 |
| 1998 | 51.36 | 44.58 | 6.78 | 246.71 | 11.29 | 4.52 | 43.73 | 15.01 | 65.66 | 2.97 | 1.55 | 28.74 | 5.86 | 5.85 | 13.10 | 39.60 | 301746.74 | 89168.87 |
| 1999 | 51.45 | 44.65 | 6.80 | 259.23 | 13.49 | 5.29 | 41.61 | 13.54 | 67.47 | 3.57 | 1.72 | 28.92 | 5.87 | 5.83 | 13.60 | 40.40 | 202613.16 | 89103.32 |
| 2000 | 51.36 | 44.56 | 6.80 | 256.54 | 14.54 | 6.16 | 40.63 | 12.20 | 69.98 | 4.31 | 1.85 | 29.10 | 5.87 | 5.82 | 14.10 | 41.10 | 215278.01 | 89056.58 |
| 2001 | 51.81 | 44.94 | 6.87 | 281.07 | 12.24 | 5.64 | 41.51 | 12.32 | 70.31 | 3.97 | 1.68 | 29.28 | 5.92 | 5.81 | 14.60 | 41.90 | 293796.22 | 88994.71 |
| 2002 | 51.87 | 45.01 | 6.86 | 296.98 | 14.00 | 6.45 | 35.80 | 10.88 | 69.61 | 4.49 | 1.96 | 29.46 | 5.96 | 5.80 | 15.00 | 42.60 | 248706.42 | 88946.21 |
| 2003 | 52.13 | 45.22 | 6.91 | 307.03 | 14.97 | 6.39 | 32.75 | 11.70 | 64.27 | 4.11 | 2.28 | 29.64 | 5.98 | 5.78 | 15.50 | 43.30 | 354834.81 | 88891.86 |
| 2004 | 52.30 | 45.36 | 6.94 | 321.30 | 16.42 | 5.91 | 32.10 | 12.98 | 59.56 | 3.52 | 2.39 | 29.82 | 5.99 | 5.76 | 16.00 | 44.10 | 301972.73 | 88835.40 |
| 2005 | 52.38 | 45.42 | 6.96 | 339.13 | 21.39 | 6.87 | 27.32 | 10.19 | 62.70 | 4.31 | 2.56 | 30.00 | 6.00 | 5.74 | 16.50 | 44.80 | 349872.74 | 88794.63 |
| 2006 | 52.63 | 45.66 | 6.97 | 361.75 | 21.26 | 6.51 | 26.31 | 10.35 | 60.67 | 3.95 | 2.56 | 30.18 | 6.04 | 5.71 | 16.90 | 45.60 | 301392.99 | 88732.86 |
| 2007 | 52.95 | 45.94 | 7.01 | 377.38 | 21.41 | 5.25 | 19.58 | 59.02 | 59.02 | 3.10 | 2.15 | 30.36 | 6.08 | 5.67 | 17.40 | 46.30 | 317678.29 | 88675.18 |
| 2008 | 53.65 | 46.52 | 7.13 | 391.71 | 23.61 | 4.91 | 13.10 | 6.15  | 53.06 | 2.61 | 2.31 | 30.55 | 6.10 | 5.64 | 17.90 | 47.00 | 363780.57 | 88625.58 |
| 2009 | 54.11 | 46.91 | 7.21 | 404.60 | 24.63 | 5.43 | 13.29 | 7.14  | 46.28 | 2.52 | 2.92 | 30.75 | 6.11 | 5.60 | 18.40 | 47.80 | 307176.21 | 88599.30 |
| 2010 | 54.51 | 47.24 | 7.27 | 419.23 | 22.39 | 5.38 | 17.54 | 7.70  | 56.10 | 3.02 | 2.36 | 30.96 | 6.10 | 5.56 | 18.80 | 48.50 | 379823.55 | 88579.42 |
| 2011 | 55.09 | 47.82 | 7.27 | 436.14 | 32.89 | 6.23 | 11.46 | 6.56  | 42.74 | 2.66 | 3.57 | 31.18 | 6.12 | 5.52 | 19.30 | 49.30 | 380073.24 | 88507.76 |
| 2012 | 55.67 | 48.38 | 7.29 | 454.11 | 32.38 | 5.58 | 14.27 | 7.17  | 49.76 | 2.78 | 2.80 | 31.42 | 6.11 | 5.47 | 19.80 | 50.10 | 380308.29 | 88445.16 |
| 2013 | 56.56 | 49.16 | 7.40 | 472.59 | 34.44 | 5.90 | 14.26 | 6.72  | 52.88 | 3.12 | 2.78 | 31.67 | 6.10 | 5.42 | 20.30 | 50.80 | -         | 88408.36 |
| 2014 | 57.95 | 50.32 | 7.63 | 493.25 | 42.00 | 6.98 | 21.75 | 9.48  | 56.44 | 3.94 | 3.04 | 31.93 | 6.08 | 5.37 | 20.40 | 50.90 | -         | 88376.81 |
| 2015 | 59.01 | 51.22 | 7.79 | 510.79 | -     | -    | -     | -     | -     | -    | -    | 32.21 | 6.06 | 5.31 | 20.50 | 51.10 | -         | 88365.12 |
| 2016 | 60.02 | 52.08 | 7.94 | 515.39 | -     | -    | -     | -     | -     | -    | -    | 32.51 | 6.07 | -    | -     | -     | -         | 88336.22 |
| 2017 | 58.35 | 50.60 | 7.74 | -      | -     | -    | -     | -     | -     | -    | -    | -     | -    | -    | -     | -     | -         | -        |

|         |      |       |       |      |        |      |      |        |       |       |      |      |       |      |      |       |       |           |          |
|---------|------|-------|-------|------|--------|------|------|--------|-------|-------|------|------|-------|------|------|-------|-------|-----------|----------|
| Myanmar | 1995 | 59.54 | 52.28 | 7.26 | 246.06 | 2.41 | 2.14 | 99.92  | 80.98 | 18.96 | 0.41 | 1.73 | 25.53 | 7.72 | 3.04 | 54.40 | 60.90 | 943040.18 | 88975.61 |
|         | 1996 | 59.88 | 52.60 | 7.27 | 258.60 | 2.39 | 2.12 | 99.39  | 83.68 | 15.81 | 0.33 | 1.78 | 25.77 | 7.75 | 2.99 | 55.90 | 62.00 | 704660.58 | 89014.71 |
|         | 1997 | 60.11 | 52.83 | 7.28 | 269.65 | 1.83 | 1.80 | 99.59  | 85.07 | 14.58 | 0.26 | 1.54 | 26.04 | 7.76 | 2.97 | 57.40 | 63.20 | 697087.16 | 89060.51 |
|         | 1998 | 60.43 | 53.12 | 7.31 | 281.73 | 1.90 | 1.59 | 100.00 | 89.41 | 10.59 | 0.17 | 1.42 | 26.33 | 7.75 | 2.95 | 58.90 | 64.30 | 306622.79 | 89110.99 |
|         | 1999 | 60.75 | 53.40 | 7.34 | 308.59 | 2.45 | 1.56 | 100.00 | 89.01 | 10.99 | 0.17 | 1.38 | 26.64 | 7.71 | 2.93 | 60.40 | 65.40 | 337749.19 | 89139.26 |
|         | 2000 | 61.10 | 53.71 | 7.39 | 346.77 | 3.19 | 1.84 | 100.00 | 85.79 | 14.21 | 0.26 | 1.58 | 26.97 | 7.65 | 2.91 | 61.90 | 66.60 | 185137.09 | 89179.44 |
|         | 2001 | 61.51 | 54.09 | 7.42 | 381.70 | 2.47 | 1.80 | 99.95  | 87.46 | 12.50 | 0.22 | 1.58 | 27.32 | 7.65 | 2.89 | 63.40 | 67.70 | 186669.70 | 89063.20 |

|      |       |       |      |         |       |      |       |       |       |      |      |       |      |      |       |       |           |          |
|------|-------|-------|------|---------|-------|------|-------|-------|-------|------|------|-------|------|------|-------|-------|-----------|----------|
| 2002 | 61.96 | 54.49 | 7.47 | 422.96  | 2.82  | 2.05 | 98.79 | 83.68 | 15.29 | 0.31 | 1.74 | 27.69 | 7.63 | 2.87 | 64.90 | 68.90 | 226294.68 | 88947.63 |
| 2003 | 62.48 | 54.94 | 7.54 | 476.61  | 3.71  | 1.97 | 98.61 | 86.40 | 12.38 | 0.24 | 1.72 | 28.08 | 7.59 | 2.83 | 66.40 | 70.00 | 187353.37 | 88832.52 |
| 2004 | 63.01 | 55.40 | 7.61 | 536.21  | 4.57  | 1.97 | 98.64 | 85.26 | 13.56 | 0.27 | 1.70 | 28.50 | 7.54 | 2.78 | 67.90 | 71.20 | 379912.77 | 88716.82 |
| 2005 | 63.58 | 55.89 | 7.69 | 603.83  | 4.74  | 1.83 | 99.62 | 90.64 | 9.01  | 0.16 | 1.67 | 28.93 | 7.49 | 2.72 | 69.40 | 72.30 | 223012.72 | 88626.51 |
| 2006 | 64.26 | 56.51 | 7.75 | 677.70  | 5.36  | 1.78 | 95.33 | 81.58 | 14.43 | 0.26 | 1.52 | 29.39 | 7.50 | 2.66 | 70.80 | 73.50 | 199289.35 | 88589.09 |
| 2007 | 64.93 | 57.07 | 7.85 | 753.95  | 6.94  | 1.68 | 95.58 | 11.77 | 11.77 | 0.20 | 1.49 | 29.87 | 7.51 | 2.59 | 72.30 | 74.60 | 349940.75 | 88555.03 |
| 2008 | 59.66 | 52.64 | 7.02 | 826.09  | 9.83  | 1.87 | 95.72 | 85.12 | 11.07 | 0.21 | 1.67 | 30.36 | 7.51 | 2.53 | 73.80 | 75.80 | 189004.37 | 88543.59 |
| 2009 | 66.20 | 58.14 | 8.06 | 907.36  | 13.20 | 2.05 | 92.70 | 82.16 | 11.37 | 0.23 | 1.81 | 30.88 | 7.52 | 2.47 | 75.20 | 76.90 | 266006.03 | 88559.93 |
| 2010 | 66.82 | 58.68 | 8.14 | 987.74  | 15.25 | 1.92 | 90.75 | 76.61 | 15.58 | 0.30 | 1.62 | 31.41 | 7.53 | 2.41 | 76.60 | 78.10 | 325367.14 | 88586.29 |
| 2011 | 67.35 | 59.14 | 8.21 | 1034.77 | 19.07 | 1.87 | 93.72 | 78.79 | 15.93 | 0.30 | 1.57 | 31.94 | 7.58 | 2.36 | 78.00 | 79.20 | 526919.84 | 88681.55 |
| 2012 | 67.94 | 59.67 | 8.27 | 1101.21 | 23.67 | 2.22 | 93.72 | 59.09 | 36.95 | 0.82 | 1.40 | 32.47 | 7.62 | 2.32 | 79.40 | 80.30 | 528416.22 | 88805.40 |
| 2013 | 68.51 | 60.18 | 8.33 | 1183.28 | 17.93 | 2.16 | 93.72 | 57.81 | 38.31 | 0.83 | 1.33 | 33.01 | 7.69 | 2.29 | 79.50 | 80.40 | -         | 88939.09 |
| 2014 | 69.04 | 60.65 | 8.39 | 1266.12 | 20.29 | 2.28 | 93.72 | 50.69 | 45.91 | 1.04 | 1.23 | 33.55 | 7.80 | 2.26 | 79.50 | 80.50 | -         | 89098.94 |
| 2015 | 69.50 | 61.06 | 8.44 | 1342.26 | -     | -    | -     | -     | -     | -    | -    | 34.10 | 7.96 | 2.23 | 79.60 | 80.60 | -         | 89261.90 |
| 2016 | 70.02 | 61.56 | 8.46 | 1408.14 | -     | -    | -     | -     | -     | -    | -    | 34.65 | 8.21 | -    | -     | -     | -         | 89423.56 |
| 2017 | 68.50 | 59.90 | 8.61 | -       | -     | -    | -     | -     | -     | -    | -    | -     | -    | -    | -     | -     | -         | -        |

|         |      |       |       |      |         |        |      |       |       |       |      |      |       |      |      |       |       |          |          |
|---------|------|-------|-------|------|---------|--------|------|-------|-------|-------|------|------|-------|------|------|-------|-------|----------|----------|
| Namibia | 1995 | 59.86 | 52.40 | 7.45 | 3617.29 | 131.46 | 6.21 | 21.81 | 6.30  | 71.10 | 4.41 | 1.79 | 29.81 | 6.17 | 4.59 | 25.70 | 74.10 | 7245.02  | 87743.66 |
|         | 1996 | 58.78 | 51.52 | 7.26 | 3620.89 | 134.66 | 6.58 | 21.83 | 6.06  | 72.23 | 4.75 | 1.83 | 30.32 | 6.14 | 4.47 | 26.00 | 75.00 | 6716.93  | 87751.73 |
|         | 1997 | 57.64 | 50.57 | 7.07 | 3661.05 | 141.49 | 6.84 | 21.87 | 6.13  | 71.96 | 4.92 | 1.92 | 30.82 | 6.09 | 4.35 | 26.40 | 75.90 | 7024.66  | 87783.67 |
|         | 1998 | 56.29 | 49.43 | 6.86 | 3673.84 | 128.38 | 6.84 | 21.85 | 6.02  | 72.44 | 4.95 | 1.88 | 31.34 | 6.02 | 4.23 | 26.70 | 76.80 | 22239.12 | 87808.17 |
|         | 1999 | 54.97 | 48.30 | 6.67 | 3700.59 | 127.07 | 6.97 | 21.25 | 5.67  | 73.33 | 5.11 | 1.86 | 31.85 | 5.95 | 4.12 | 27.10 | 77.60 | 28386.79 | 87829.22 |
|         | 2000 | 53.58 | 47.05 | 6.53 | 3746.71 | 125.91 | 6.11 | 18.16 | 5.64  | 68.92 | 4.21 | 1.90 | 32.37 | 5.87 | 4.02 | 27.40 | 78.50 | 33985.47 | 87864.23 |
|         | 2001 | 52.85 | 46.45 | 6.39 | 3723.53 | 113.49 | 6.18 | 6.80  | 2.98  | 56.23 | 3.47 | 2.70 | 32.90 | 5.89 | 3.93 | 27.80 | 79.30 | 31359.31 | 87877.44 |
|         | 2002 | 51.95 | 45.71 | 6.25 | 3845.06 | 105.89 | 6.17 | 9.35  | 3.93  | 58.00 | 3.58 | 2.59 | 33.77 | 5.89 | 3.84 | 28.30 | 80.30 | 29497.37 | 87895.24 |
|         | 2003 | 51.45 | 45.26 | 6.18 | 3958.87 | 162.44 | 6.52 | 11.85 | 5.09  | 57.06 | 3.72 | 2.80 | 34.71 | 5.88 | 3.77 | 28.80 | 81.20 | 28634.23 | 87927.72 |
|         | 2004 | 51.25 | 45.06 | 6.19 | 4394.41 | 213.50 | 6.47 | 7.43  | 3.75  | 49.55 | 3.21 | 3.26 | 35.67 | 5.85 | 3.71 | 29.30 | 82.10 | 34751.22 | 87968.51 |
|         | 2005 | 51.61 | 45.25 | 6.35 | 4454.63 | 262.17 | 7.32 | 7.28  | 3.72  | 48.91 | 3.58 | 3.74 | 36.63 | 5.81 | 3.67 | 29.80 | 83.00 | 30934.05 | 88018.81 |
|         | 2006 | 52.50 | 46.08 | 6.42 | 4715.11 | 279.66 | 7.20 | 5.73  | 3.24  | 43.46 | 3.13 | 4.07 | 37.61 | 5.84 | 3.64 | 30.30 | 83.90 | 37085.69 | 88063.31 |
|         | 2007 | 54.06 | 47.41 | 6.65 | 4968.66 | 293.43 | 6.99 | 18.67 | 54.35 | 54.35 | 3.80 | 3.19 | 38.60 | 5.85 | 3.62 | 30.80 | 84.80 | 36561.10 | 88097.33 |

|      |       |       |      |         |        |      |       |      |       |      |      |       |      |      |       |       |          |          |
|------|-------|-------|------|---------|--------|------|-------|------|-------|------|------|-------|------|------|-------|-------|----------|----------|
| 2008 | 55.62 | 48.71 | 6.91 | 5036.25 | 285.98 | 7.15 | 17.91 | 8.14 | 54.53 | 3.90 | 3.25 | 39.60 | 5.86 | 3.61 | 31.30 | 85.60 | 28595.47 | 88135.42 |
| 2009 | 57.21 | 50.01 | 7.20 | 4978.68 | 332.05 | 8.05 | 17.92 | 8.09 | 54.86 | 4.42 | 3.64 | 40.60 | 5.85 | 3.61 | 31.70 | 86.50 | 39971.70 | 88148.74 |
| 2010 | 58.61 | 51.14 | 7.46 | 5191.58 | 405.64 | 7.89 | 17.91 | 7.48 | 58.21 | 4.59 | 3.30 | 41.62 | 5.84 | 3.61 | 32.20 | 87.30 | 37647.57 | 88166.44 |
| 2011 | 60.02 | 52.36 | 7.66 | 5351.37 | 486.47 | 8.78 | 17.91 | 7.07 | 60.54 | 5.32 | 3.46 | 42.64 | 5.84 | 3.60 | 32.70 | 88.00 | 37855.65 | 88148.36 |
| 2012 | 61.63 | 53.73 | 7.90 | 5502.26 | 467.90 | 8.24 | 17.91 | 7.35 | 58.94 | 4.85 | 3.38 | 43.67 | 5.84 | 3.59 | 33.10 | 88.80 | 38049.27 | 88122.80 |
| 2013 | 62.59 | 54.57 | 8.03 | 5679.28 | 470.04 | 8.53 | 17.91 | 7.35 | 58.97 | 5.03 | 3.50 | 44.68 | 5.84 | 3.56 | 33.60 | 89.60 | -        | 88097.52 |
| 2014 | 63.55 | 55.40 | 8.16 | 5901.24 | 499.02 | 8.93 | 17.92 | 7.17 | 60.00 | 5.36 | 3.57 | 45.68 | 5.84 | 3.52 | 34.00 | 90.30 | -        | 88080.18 |
| 2015 | 64.22 | 55.97 | 8.24 | 6114.06 | -      | -    | -     | -    | -     | -    | -    | 46.66 | 5.85 | 3.47 | 34.40 | 91.00 | -        | 88052.62 |
| 2016 | 64.77 | 56.47 | 8.30 | 6045.22 | -      | -    | -     | -    | -     | -    | -    | 47.63 | 5.90 | -    | -     | -     | -        | 88041.36 |
| 2017 | 66.49 | 57.09 | 9.40 | -       | -      | -    | -     | -    | -     | -    | -    | -     | -    | -    | -     | -     | -        | -        |

|       |      |       |       |      |        |       |      |       |       |       |      |      |       |      |      |       |       |          |          |
|-------|------|-------|-------|------|--------|-------|------|-------|-------|-------|------|------|-------|------|------|-------|-------|----------|----------|
| Nepal | 1995 | 60.59 | 52.46 | 8.12 | 403.05 | 10.49 | 5.31 | 94.62 | 69.56 | 26.48 | 1.41 | 3.91 | 10.90 | 6.62 | 4.72 | 13.10 | 71.60 | 26905.31 | 88298.69 |
|       | 1996 | 61.33 | 53.09 | 8.24 | 414.70 | 10.86 | 5.42 | 94.31 | 69.56 | 26.25 | 1.42 | 4.00 | 11.37 | 6.69 | 4.60 | 14.80 | 72.70 | 27238.25 | 88294.00 |
|       | 1997 | 62.07 | 53.71 | 8.37 | 426.17 | 11.87 | 5.50 | 93.83 | 68.73 | 26.75 | 1.47 | 4.03 | 11.86 | 6.73 | 4.47 | 16.60 | 73.80 | 27566.65 | 88282.98 |
|       | 1998 | 62.58 | 54.13 | 8.44 | 430.07 | 13.18 | 6.61 | 92.93 | 57.02 | 38.64 | 2.55 | 4.06 | 12.36 | 6.77 | 4.33 | 18.30 | 75.00 | 28206.92 | 88273.62 |
|       | 1999 | 63.17 | 54.63 | 8.55 | 440.38 | 12.63 | 5.87 | 92.36 | 64.63 | 30.02 | 1.76 | 4.11 | 12.89 | 6.80 | 4.18 | 20.00 | 76.00 | 41332.58 | 88275.87 |
|       | 2000 | 63.72 | 55.10 | 8.63 | 459.12 | 12.21 | 5.43 | 91.21 | 68.49 | 24.91 | 1.35 | 4.08 | 13.43 | 6.82 | 4.03 | 21.70 | 77.10 | 31234.02 | 88287.59 |
|       | 2001 | 64.33 | 55.60 | 8.73 | 472.77 | 13.08 | 5.36 | 91.08 | 63.99 | 29.74 | 1.59 | 3.77 | 13.97 | 6.96 | 3.88 | 23.40 | 78.20 | 29843.76 | 88390.04 |
|       | 2002 | 64.40 | 55.68 | 8.72 | 465.55 | 13.48 | 5.60 | 88.65 | 62.68 | 29.29 | 1.64 | 3.96 | 14.26 | 7.12 | 3.72 | 25.00 | 79.20 | 28915.42 | 88516.83 |
|       | 2003 | 65.24 | 56.39 | 8.85 | 476.46 | 14.26 | 5.48 | 89.45 | 64.53 | 27.86 | 1.53 | 3.96 | 14.56 | 7.29 | 3.58 | 26.60 | 80.20 | 29847.02 | 88641.35 |
|       | 2004 | 65.55 | 56.67 | 8.88 | 491.70 | 16.84 | 5.82 | 75.36 | 54.78 | 27.31 | 1.59 | 4.23 | 14.87 | 7.48 | 3.43 | 28.30 | 81.20 | 30427.86 | 88789.83 |
|       | 2005 | 66.02 | 57.10 | 8.91 | 502.24 | 18.53 | 5.72 | 72.95 | 52.74 | 27.70 | 1.59 | 4.14 | 15.18 | 7.69 | 3.29 | 29.90 | 82.20 | 30862.52 | 88949.12 |
|       | 2006 | 66.47 | 57.53 | 8.94 | 513.13 | 19.85 | 5.70 | 72.78 | 46.66 | 35.90 | 2.04 | 3.65 | 15.50 | 7.84 | 3.15 | 31.50 | 83.20 | 30946.10 | 89029.98 |
|       | 2007 | 66.91 | 57.89 | 9.02 | 525.08 | 24.56 | 5.84 | 82.87 | 39.09 | 39.09 | 2.28 | 3.56 | 15.82 | 7.99 | 3.01 | 33.10 | 84.10 | 31263.61 | 89104.49 |
|       | 2008 | 67.34 | 58.27 | 9.06 | 551.64 | 28.58 | 6.44 | 83.63 | 48.21 | 42.35 | 2.73 | 3.71 | 16.15 | 8.14 | 2.87 | 34.70 | 85.10 | 32026.57 | 89170.23 |
|       | 2009 | 67.79 | 58.67 | 9.12 | 570.93 | 30.70 | 6.41 | 81.26 | 45.45 | 44.08 | 2.82 | 3.58 | 16.48 | 8.29 | 2.74 | 36.30 | 86.10 | 32809.26 | 89228.40 |
|       | 2010 | 68.27 | 59.13 | 9.14 | 592.18 | 38.96 | 6.43 | 80.33 | 44.52 | 44.58 | 2.87 | 3.56 | 16.82 | 8.44 | 2.61 | 37.90 | 87.00 | 32738.69 | 89292.61 |
|       | 2011 | 68.74 | 59.49 | 9.25 | 605.63 | 45.72 | 6.73 | 79.86 | 41.38 | 48.18 | 3.24 | 3.49 | 17.17 | 8.48 | 2.49 | 39.50 | 88.00 | 33160.97 | 89239.97 |
|       | 2012 | 69.23 | 59.91 | 9.31 | 627.18 | 38.41 | 5.89 | 78.97 | 45.91 | 41.86 | 2.47 | 3.43 | 17.52 | 8.51 | 2.38 | 41.10 | 88.90 | 40762.72 | 89196.80 |
|       | 2013 | 69.66 | 60.28 | 9.38 | 645.25 | 37.18 | 5.69 | 79.86 | 48.68 | 39.04 | 2.22 | 3.47 | 17.88 | 8.57 | 2.29 | 42.60 | 89.80 | -        | 89157.62 |

|             |      |       |       |       |          |         |       |       |       |       |      |      |       |       |      |       |        |           |          |
|-------------|------|-------|-------|-------|----------|---------|-------|-------|-------|-------|------|------|-------|-------|------|-------|--------|-----------|----------|
|             | 2014 | 70.05 | 60.62 | 9.43  | 675.74   | 39.87   | 5.80  | 79.86 | 47.65 | 40.33 | 2.34 | 3.46 | 18.24 | 8.67  | 2.22 | 44.20 | 90.70  | -         | 89146.11 |
|             | 2015 | 69.70 | 60.33 | 9.37  | 690.08   | -       | -     | -     | -     | -     | -    | -    | 18.62 | 8.84  | 2.16 | 45.80 | 91.60  | -         | 89166.75 |
|             | 2016 | 70.86 | 61.37 | 9.49  | 685.12   | -       | -     | -     | -     | -     | -    | -    | 19.00 | 9.00  | -    | -     | -      | -         | 89201.87 |
|             | 2017 | 70.92 | 61.10 | 9.82  | -        | -       | -     | -     | -     | -     | -    | -    | -     | -     | -    | -     | -      | -         | -        |
| Netherlands | 1995 | 77.55 | 67.37 | 10.17 | 38438.55 | 2261.89 | 7.44  | 33.29 | 9.64  | 71.04 | 5.29 | 2.15 | 72.81 | 19.17 | 1.53 | 98.20 | 100.00 | 235053.01 | 90411.65 |
|             | 1996 | 77.69 | 67.49 | 10.20 | 39626.29 | 2215.27 | 7.48  | 24.02 | 8.12  | 66.18 | 4.95 | 2.53 | 73.64 | 19.35 | 1.53 | 98.10 | 100.00 | 244204.43 | 90442.76 |
|             | 1997 | 77.91 | 67.66 | 10.25 | 41117.96 | 1973.73 | 7.48  | 23.84 | 7.67  | 67.82 | 5.07 | 2.41 | 74.45 | 19.53 | 1.56 | 98.10 | 100.00 | 235836.24 | 90466.95 |
|             | 1998 | 78.00 | 67.74 | 10.27 | 42714.51 | 2073.68 | 7.56  | 23.57 | 8.45  | 64.15 | 4.85 | 2.71 | 75.25 | 19.70 | 1.63 | 98.10 | 100.00 | 227061.48 | 90478.32 |
|             | 1999 | 78.03 | 67.76 | 10.28 | 44574.69 | 2111.57 | 7.53  | 24.10 | 8.99  | 62.71 | 4.72 | 2.81 | 76.03 | 19.85 | 1.65 | 98.10 | 100.00 | 218722.67 | 90482.58 |
|             | 2000 | 78.14 | 67.82 | 10.32 | 46133.18 | 1931.79 | 7.42  | 24.32 | 8.98  | 63.08 | 4.68 | 2.74 | 76.80 | 19.99 | 1.72 | 98.10 | 100.00 | 220319.90 | 90492.74 |
|             | 2001 | 78.29 | 67.97 | 10.32 | 46758.88 | 2079.41 | 7.79  | 23.39 | 8.70  | 62.81 | 4.89 | 2.90 | 77.83 | 20.18 | 1.71 | 98.00 | 100.00 | 220252.52 | 90489.58 |
|             | 2002 | 78.47 | 68.14 | 10.33 | 46509.52 | 2411.36 | 8.34  | 21.37 | 8.02  | 62.46 | 5.21 | 3.13 | 79.11 | 20.36 | 1.73 | 98.00 | 100.00 | 218276.48 | 90512.37 |
|             | 2003 | 78.75 | 68.37 | 10.38 | 46422.02 | 2986.76 | 8.46  | 23.80 | 7.97  | 66.54 | 5.63 | 2.83 | 80.34 | 20.54 | 1.75 | 98.00 | 100.00 | 221354.46 | 90542.54 |
|             | 2004 | 79.16 | 68.70 | 10.46 | 47200.42 | 3409.74 | 8.52  | 22.85 | 7.86  | 65.61 | 5.59 | 2.93 | 81.51 | 20.72 | 1.72 | 97.90 | 100.00 | 221355.35 | 90592.25 |
|             | 2005 | 79.50 | 68.97 | 10.53 | 48107.59 | 3994.00 | 9.60  | 25.08 | 7.65  | 69.48 | 6.67 | 2.93 | 82.63 | 20.92 | 1.71 | 97.90 | 100.00 | 217083.63 | 90670.58 |
|             | 2006 | 79.86 | 69.26 | 10.61 | 49720.39 | 4162.44 | 9.36  | 41.86 | 6.19  | 85.22 | 7.97 | 1.38 | 83.64 | 21.25 | 1.72 | 97.90 | 100.00 | 211767.90 | 90723.95 |
|             | 2007 | 80.19 | 69.52 | 10.68 | 51447.26 | 4801.73 | 9.36  | 41.42 | 85.29 | 85.29 | 7.98 | 1.38 | 84.54 | 21.58 | 1.72 | 97.90 | 100.00 | 208848.04 | 90784.33 |
|             | 2008 | 80.41 | 69.68 | 10.73 | 52118.09 | 5462.49 | 9.57  | 43.45 | 6.18  | 85.77 | 8.21 | 1.36 | 85.40 | 21.94 | 1.77 | 97.80 | 100.00 | 205061.31 | 90845.96 |
|             | 2009 | 80.61 | 69.84 | 10.77 | 49897.23 | 5355.07 | 10.29 | 39.01 | 5.26  | 86.50 | 8.90 | 1.39 | 86.24 | 22.41 | 1.79 | 97.80 | 100.00 | 201884.49 | 90902.53 |
|             | 2010 | 80.80 | 69.98 | 10.82 | 50338.25 | 5286.47 | 10.48 | 39.61 | 5.27  | 86.69 | 9.08 | 1.39 | 87.06 | 23.03 | 1.79 | 97.80 | 100.00 | 212418.46 | 90977.63 |
|             | 2011 | 80.98 | 70.14 | 10.85 | 50937.55 | 5649.20 | 10.53 | 39.57 | 5.42  | 86.31 | 9.09 | 1.44 | 87.84 | 23.79 | 1.76 | 97.80 | 100.00 | 200143.54 | 91041.69 |
|             | 2012 | 81.12 | 70.25 | 10.87 | 50212.96 | 5456.45 | 11.01 | 40.23 | 5.42  | 86.52 | 9.53 | 1.48 | 88.58 | 24.69 | 1.72 | 97.80 | 100.00 | 195873.76 | 91123.87 |
|             | 2013 | 81.34 | 70.43 | 10.91 | 49969.85 | 5688.44 | 11.04 | 40.43 | 5.23  | 87.07 | 9.62 | 1.43 | 89.27 | 25.65 | 1.68 | 97.80 | 100.00 | -         | 91210.89 |
|             | 2014 | 81.52 | 70.58 | 10.94 | 50497.24 | 5693.86 | 10.90 | 40.18 | 5.22  | 87.00 | 9.48 | 1.42 | 89.91 | 26.58 | 1.71 | 97.70 | 100.00 | -         | 91297.51 |
|             | 2015 | 81.65 | 70.70 | 10.95 | 51410.49 | -       | -     | -     | -     | -     | -    | -    | 90.50 | 27.43 | 1.71 | 97.70 | 100.00 | -         | 91375.39 |
|             | 2016 | 81.64 | 70.70 | 10.94 | 52304.30 | -       | -     | -     | -     | -     | -    | -    | 91.03 | 28.24 | -    | -     | -      | -         | 91445.22 |
|             | 2017 | 81.52 | 70.16 | 11.36 | -        | -       | -     | -     | -     | -     | -    | -    | -     | -     | -    | -     | -      | -         | -        |
| new Zealand | 1995 | 76.98 | 67.19 | 9.80  | 26804.83 | 1202.81 | 6.95  | 70.74 | 16.15 | 77.17 | 5.36 | 1.59 | 85.33 | 17.66 | 1.99 | -     | 100.00 | 69576.05  | 87452.04 |
|             | 1996 | 77.18 | 67.35 | 9.83  | 27341.08 | 1291.82 | 6.89  | 69.87 | 16.29 | 76.68 | 5.28 | 1.61 | 85.42 | 17.79 | 1.96 | -     | 100.00 | 70563.23  | 87445.00 |

|      |       |       |       |          |         |       |       |       |       |      |      |       |       |      |   |        |          |          |
|------|-------|-------|-------|----------|---------|-------|-------|-------|-------|------|------|-------|-------|------|---|--------|----------|----------|
| 1997 | 77.57 | 67.65 | 9.92  | 27533.79 | 1307.64 | 7.10  | 68.83 | 15.63 | 77.29 | 5.49 | 1.61 | 85.49 | 17.87 | 1.96 | - | 100.00 | 73548.22 | 87493.99 |
| 1998 | 77.96 | 67.95 | 10.01 | 27512.47 | 1129.68 | 7.51  | 70.83 | 16.26 | 77.03 | 5.79 | 1.73 | 85.55 | 17.93 | 1.89 | - | 100.00 | 69545.60 | 87562.67 |
| 1999 | 78.21 | 68.15 | 10.06 | 28861.12 | 1157.64 | 7.40  | 70.70 | 15.92 | 77.48 | 5.73 | 1.67 | 85.61 | 17.99 | 1.97 | - | 100.00 | 71814.67 | 87625.70 |
| 2000 | 78.55 | 68.41 | 10.14 | 29525.12 | 1056.08 | 7.47  | 69.88 | 15.36 | 78.02 | 5.83 | 1.64 | 85.68 | 18.05 | 1.98 | - | 100.00 | 74422.83 | 87735.51 |
| 2001 | 78.71 | 68.56 | 10.15 | 30363.32 | 1058.84 | 7.58  | 72.04 | 16.99 | 76.42 | 5.79 | 1.79 | 85.76 | 18.04 | 1.97 | - | 100.00 | 76276.94 | 87677.39 |
| 2002 | 79.00 | 68.80 | 10.20 | 31233.91 | 1261.34 | 7.89  | 72.65 | 16.06 | 77.90 | 6.15 | 1.74 | 85.90 | 18.04 | 1.89 | - | 100.00 | 77305.47 | 87667.15 |
| 2003 | 79.27 | 69.02 | 10.25 | 32019.15 | 1623.88 | 7.71  | 72.65 | 15.74 | 78.34 | 6.04 | 1.67 | 86.00 | 18.06 | 1.93 | - | 100.00 | 80252.28 | 87659.41 |
| 2004 | 79.52 | 69.22 | 10.29 | 32792.17 | 1992.66 | 7.89  | 69.26 | 14.11 | 79.63 | 6.28 | 1.61 | 86.03 | 18.10 | 1.98 | - | 100.00 | 80229.16 | 87644.02 |
| 2005 | 79.89 | 69.51 | 10.37 | 33494.58 | 2307.10 | 8.25  | 69.24 | 14.07 | 79.68 | 6.57 | 1.68 | 86.05 | 18.17 | 1.97 | - | 100.00 | 82066.57 | 87662.67 |
| 2006 | 80.04 | 69.66 | 10.38 | 34016.62 | 2315.65 | 8.65  | 69.43 | 13.84 | 80.07 | 6.92 | 1.72 | 86.08 | 18.39 | 2.01 | - | 100.00 | 83539.49 | 87645.86 |
| 2007 | 80.23 | 69.82 | 10.41 | 34674.01 | 2713.54 | 8.35  | 65.06 | 82.39 | 82.39 | 6.88 | 1.47 | 86.10 | 18.61 | 2.18 | - | 100.00 | 81888.39 | 87599.60 |
| 2008 | 80.37 | 69.94 | 10.43 | 33996.08 | 3318.77 | 10.70 | 69.64 | 11.66 | 83.25 | 8.91 | 1.79 | 86.13 | 18.87 | 2.19 | - | 100.00 | 81442.90 | 87553.83 |
| 2009 | 80.63 | 70.15 | 10.48 | 33555.47 | 3145.24 | 11.21 | 66.12 | 11.11 | 83.20 | 9.32 | 1.88 | 86.15 | 19.21 | 2.13 | - | 100.00 | 76062.15 | 87568.43 |
| 2010 | 80.93 | 70.38 | 10.55 | 33691.35 | 3742.56 | 11.20 | 64.88 | 10.97 | 83.10 | 9.31 | 1.89 | 86.17 | 19.64 | 2.17 | - | 100.00 | 76141.66 | 87598.69 |
| 2011 | 80.99 | 70.42 | 10.57 | 34194.45 | 4251.40 | 11.24 | 64.34 | 10.87 | 83.11 | 9.34 | 1.90 | 86.18 | 20.07 | 2.09 | - | 100.00 | 75851.12 | 87712.27 |
| 2012 | 81.25 | 70.63 | 10.62 | 34771.29 | 4470.86 | 11.53 | 63.80 | 10.97 | 82.80 | 9.55 | 1.98 | 86.20 | 20.59 | 2.10 | - | 100.00 | 78130.98 | 87875.83 |
| 2013 | 81.48 | 70.81 | 10.68 | 35350.44 | 4661.80 | 11.17 | 62.57 | 10.90 | 82.58 | 9.23 | 1.95 | 86.22 | 21.19 | 2.01 | - | 100.00 | -        | 88057.42 |
| 2014 | 81.54 | 70.85 | 10.70 | 36006.02 | 4896.35 | 11.03 | 62.57 | 11.04 | 82.35 | 9.08 | 1.95 | 86.25 | 21.80 | 1.92 | - | 100.00 | -        | 88252.26 |
| 2015 | 81.49 | 70.81 | 10.68 | 36507.17 | -       | -     | -     | -     | -     | -    | -    | 86.28 | 22.40 | 1.99 | - | 100.00 | -        | 88447.97 |
| 2016 | 81.48 | 70.80 | 10.68 | 36844.45 | -       | -     | -     | -     | -     | -    | -    | 86.32 | 23.01 | -    | - | -      | -        | 88648.27 |
| 2017 | 81.64 | 69.05 | 12.59 | -        | -       | -     | -     | -     | -     | -    | -    | -     | -     | -    | - | -      | -        | -        |

|           |      |       |       |      |         |       |      |       |       |       |      |      |       |      |      |       |       |          |          |
|-----------|------|-------|-------|------|---------|-------|------|-------|-------|-------|------|------|-------|------|------|-------|-------|----------|----------|
| Nicaragua | 1995 | 73.78 | 64.98 | 8.80 | 1117.05 | 58.08 | 6.48 | 98.51 | 35.07 | 64.40 | 4.18 | 2.31 | 53.53 | 6.57 | 3.78 | 49.20 | 75.80 | 10769.14 | 86888.34 |
|           | 1996 | 74.07 | 65.25 | 8.82 | 1165.54 | 58.73 | 6.41 | 98.83 | 40.31 | 59.21 | 3.79 | 2.61 | 53.78 | 6.63 | 3.62 | 50.20 | 76.40 | 10980.73 | 86865.10 |
|           | 1997 | 74.44 | 65.57 | 8.87 | 1190.03 | 48.33 | 5.27 | 97.62 | 49.87 | 48.91 | 2.58 | 2.69 | 54.02 | 6.67 | 3.47 | 51.30 | 77.00 | 11325.79 | 86845.24 |
|           | 1998 | 72.67 | 64.09 | 8.58 | 1213.17 | 53.56 | 5.63 | 98.04 | 49.74 | 49.27 | 2.77 | 2.85 | 54.26 | 6.71 | 3.33 | 52.30 | 77.60 | 22494.95 | 86856.68 |
|           | 1999 | 75.26 | 66.27 | 9.00 | 1277.53 | 52.15 | 5.32 | 95.65 | 51.85 | 45.79 | 2.43 | 2.88 | 54.50 | 6.75 | 3.20 | 53.40 | 78.30 | 12417.60 | 86883.58 |
|           | 2000 | 75.67 | 66.61 | 9.05 | 1309.53 | 54.78 | 5.39 | 91.63 | 42.65 | 53.46 | 2.88 | 2.51 | 54.74 | 6.79 | 3.08 | 54.40 | 78.90 | 14043.29 | 86925.09 |
|           | 2001 | 75.93 | 66.84 | 9.09 | 1328.75 | 55.18 | 5.26 | 91.42 | 42.12 | 53.92 | 2.84 | 2.42 | 54.98 | 6.86 | 2.98 | 55.50 | 79.50 | 14462.64 | 86995.25 |
|           | 2002 | 76.10 | 67.00 | 9.09 | 1320.39 | 57.72 | 5.71 | 95.46 | 45.43 | 52.41 | 3.00 | 2.72 | 55.22 | 6.93 | 2.89 | 56.50 | 80.10 | 14719.83 | 87066.97 |

|      |       |       |       |         |        |      |       |       |       |      |      |       |      |      |       |       |          |          |
|------|-------|-------|-------|---------|--------|------|-------|-------|-------|------|------|-------|------|------|-------|-------|----------|----------|
| 2003 | 76.19 | 67.10 | 9.09  | 1335.82 | 62.11  | 6.12 | 88.68 | 38.48 | 56.61 | 3.46 | 2.65 | 55.46 | 7.00 | 2.81 | 57.50 | 80.70 | 16965.37 | 87156.50 |
| 2004 | 76.35 | 67.24 | 9.10  | 1388.54 | 66.83  | 6.13 | 91.99 | 41.09 | 55.33 | 3.39 | 2.74 | 55.70 | 7.07 | 2.74 | 58.60 | 81.30 | 14793.13 | 87265.78 |
| 2005 | 76.64 | 67.51 | 9.12  | 1429.26 | 71.82  | 6.11 | 91.63 | 39.89 | 56.46 | 3.45 | 2.66 | 55.93 | 7.15 | 2.68 | 59.60 | 81.90 | 16831.87 | 87375.59 |
| 2006 | 76.92 | 67.77 | 9.15  | 1464.35 | 78.84  | 6.33 | 93.04 | 42.01 | 54.85 | 3.47 | 2.86 | 56.18 | 7.24 | 2.62 | 60.60 | 82.50 | 15048.35 | 87465.07 |
| 2007 | 77.10 | 67.88 | 9.21  | 1518.65 | 93.38  | 6.91 | 93.04 | 54.85 | 54.85 | 3.79 | 3.12 | 56.44 | 7.34 | 2.57 | 61.60 | 83.10 | 15276.86 | 87551.12 |
| 2008 | 77.35 | 68.09 | 9.25  | 1550.50 | 105.99 | 6.98 | 93.05 | 42.01 | 54.85 | 3.83 | 3.15 | 56.70 | 7.44 | 2.52 | 62.70 | 83.70 | 15791.95 | 87672.52 |
| 2009 | 77.42 | 68.15 | 9.26  | 1480.38 | 100.83 | 6.82 | 90.63 | 33.65 | 62.88 | 4.29 | 2.53 | 56.97 | 7.52 | 2.48 | 63.70 | 84.30 | 15861.97 | 87778.40 |
| 2010 | 77.43 | 68.20 | 9.23  | 1526.50 | 100.22 | 6.58 | 90.63 | 31.55 | 65.18 | 4.29 | 2.29 | 57.26 | 7.58 | 2.43 | 64.70 | 85.00 | 15794.35 | 87903.76 |
| 2011 | 77.55 | 68.27 | 9.28  | 1603.33 | 107.40 | 6.39 | 90.34 | 32.67 | 63.84 | 4.08 | 2.31 | 57.54 | 7.60 | 2.38 | 65.70 | 85.60 | 16068.64 | 87984.67 |
| 2012 | 77.60 | 68.32 | 9.28  | 1687.36 | 143.13 | 8.04 | 85.62 | 40.26 | 52.98 | 4.26 | 3.78 | 57.84 | 7.60 | 2.34 | 66.80 | 86.20 | 16323.04 | 88088.45 |
| 2013 | 77.68 | 68.38 | 9.29  | 1750.06 | 153.83 | 8.43 | 86.51 | 41.14 | 52.44 | 4.42 | 4.01 | 58.15 | 7.62 | 2.30 | 67.80 | 86.80 | -        | 88190.25 |
| 2014 | 77.81 | 68.50 | 9.32  | 1812.99 | 177.46 | 9.04 | 86.04 | 37.54 | 56.37 | 5.10 | 3.94 | 58.46 | 7.69 | 2.26 | 67.80 | 86.90 | -        | 88296.00 |
| 2015 | 78.03 | 68.67 | 9.35  | 1879.71 | -      | -    | -     | -     | -     | -    | -    | 58.78 | 7.84 | 2.23 | 67.90 | 87.00 | -        | 88415.29 |
| 2016 | 78.27 | 68.92 | 9.35  | 1946.37 | -      | -    | -     | -     | -     | -    | -    | 59.11 | 8.04 | -    | -     | -     | -        | 88523.45 |
| 2017 | 78.80 | 68.80 | 10.00 | -       | -      | -    | -     | -     | -     | -    | -    | -     | -    | -    | -     | -     | -        | -        |

|       |      |       |       |      |        |       |      |       |       |       |      |      |       |      |      |      |       |          |          |
|-------|------|-------|-------|------|--------|-------|------|-------|-------|-------|------|------|-------|------|------|------|-------|----------|----------|
| Niger | 1995 | 48.99 | 42.68 | 6.30 | 335.48 | 12.47 | 6.65 | 88.30 | 68.80 | 22.09 | 1.47 | 5.18 | 15.77 | 4.89 | 7.73 | 5.20 | 38.70 | 8185.43  | 90547.06 |
|       | 1996 | 49.84 | 43.41 | 6.43 | 334.85 | 12.21 | 6.30 | 88.20 | 70.22 | 20.39 | 1.28 | 5.02 | 15.86 | 4.90 | 7.72 | 5.50 | 39.70 | 8402.84  | 90540.81 |
|       | 1997 | 50.43 | 43.94 | 6.50 | 331.90 | 11.58 | 6.73 | 88.22 | 66.12 | 25.05 | 1.68 | 5.04 | 15.94 | 4.91 | 7.71 | 5.80 | 40.70 | 8595.59  | 90536.75 |
|       | 1998 | 51.03 | 44.46 | 6.57 | 353.42 | 12.88 | 6.79 | 88.25 | 66.23 | 24.95 | 1.69 | 5.10 | 16.02 | 4.92 | 7.70 | 6.00 | 41.70 | 10401.14 | 90548.82 |
|       | 1999 | 51.64 | 44.99 | 6.65 | 338.85 | 12.05 | 6.82 | 88.26 | 66.27 | 24.92 | 1.70 | 5.12 | 16.10 | 4.92 | 7.69 | 6.30 | 42.70 | 11321.46 | 90555.29 |
|       | 2000 | 52.17 | 45.44 | 6.73 | 322.15 | 8.91  | 6.01 | 87.83 | 65.57 | 25.35 | 1.52 | 4.48 | 16.19 | 4.93 | 7.68 | 6.60 | 43.70 | 11124.28 | 90573.97 |
|       | 2001 | 52.68 | 45.93 | 6.76 | 332.76 | 10.92 | 7.01 | 88.28 | 64.77 | 26.63 | 1.87 | 5.14 | 16.27 | 4.95 | 7.67 | 6.80 | 44.70 | 10982.17 | 90566.62 |
|       | 2002 | 53.48 | 46.62 | 6.86 | 330.55 | 11.20 | 6.55 | 87.95 | 62.32 | 29.15 | 1.91 | 4.64 | 16.37 | 4.96 | 7.66 | 7.10 | 45.70 | 9326.63  | 90579.11 |
|       | 2003 | 54.14 | 47.20 | 6.93 | 335.67 | 13.13 | 6.23 | 87.88 | 64.19 | 26.96 | 1.68 | 4.55 | 16.47 | 4.97 | 7.64 | 7.40 | 46.70 | 9570.27  | 90592.08 |
|       | 2004 | 54.89 | 47.86 | 7.03 | 323.97 | 14.73 | 6.61 | 87.08 | 62.76 | 27.93 | 1.85 | 4.76 | 16.59 | 4.99 | 7.63 | 7.70 | 47.70 | 9191.39  | 90609.34 |
|       | 2005 | 55.58 | 48.48 | 7.11 | 326.33 | 17.86 | 7.15 | 92.42 | 53.92 | 41.66 | 2.98 | 4.17 | 16.72 | 5.01 | 7.61 | 7.90 | 48.70 | 10258.53 | 90622.71 |
|       | 2006 | 56.19 | 49.06 | 7.14 | 332.71 | 19.27 | 7.39 | 90.53 | 51.65 | 42.94 | 3.18 | 4.22 | 16.86 | 5.05 | 7.59 | 8.20 | 49.80 | 10176.13 | 90600.97 |
|       | 2007 | 56.86 | 49.65 | 7.21 | 330.63 | 20.46 | 6.94 | 90.58 | 38.37 | 38.37 | 2.66 | 4.28 | 17.02 | 5.10 | 7.57 | 8.50 | 50.80 | 10970.29 | 90588.54 |
|       | 2008 | 57.55 | 50.27 | 7.28 | 349.00 | 24.21 | 6.76 | 91.45 | 54.97 | 39.89 | 2.70 | 4.06 | 17.19 | 5.13 | 7.54 | 8.80 | 51.90 | 10491.43 | 90576.42 |

|      |       |       |      |        |       |      |       |       |       |      |      |       |      |      |       |       |          |          |
|------|-------|-------|------|--------|-------|------|-------|-------|-------|------|------|-------|------|------|-------|-------|----------|----------|
| 2009 | 58.11 | 50.78 | 7.33 | 333.69 | 24.03 | 6.98 | 90.61 | 56.20 | 37.98 | 2.65 | 4.33 | 17.37 | 5.17 | 7.52 | 9.10  | 52.90 | 10530.93 | 90571.70 |
| 2010 | 58.75 | 51.36 | 7.39 | 348.15 | 22.33 | 6.36 | 90.49 | 59.73 | 33.99 | 2.16 | 4.20 | 17.56 | 5.19 | 7.49 | 9.50  | 54.00 | 11219.51 | 90575.78 |
| 2011 | 59.26 | 51.82 | 7.43 | 342.86 | 25.20 | 6.66 | 91.21 | 57.61 | 36.83 | 2.45 | 4.21 | 17.77 | 5.25 | 7.46 | 9.80  | 55.10 | 11342.12 | 90579.33 |
| 2012 | 59.76 | 52.28 | 7.48 | 368.94 | 23.16 | 6.11 | 94.84 | 60.50 | 36.20 | 2.21 | 3.90 | 17.99 | 5.29 | 7.42 | 10.10 | 56.20 | 11460.92 | 90578.36 |
| 2013 | 60.27 | 52.75 | 7.52 | 373.74 | 20.78 | 5.09 | 76.67 | 39.68 | 48.25 | 2.46 | 2.63 | 18.22 | 5.33 | 7.38 | 10.50 | 57.30 | -        | 90585.19 |
| 2014 | 60.77 | 53.20 | 7.57 | 386.73 | 24.40 | 5.82 | 76.67 | 34.33 | 55.22 | 3.21 | 2.61 | 18.47 | 5.36 | 7.34 | 10.80 | 58.10 | -        | 90585.91 |
| 2015 | 61.20 | 53.58 | 7.61 | 386.90 | -     | -    | -     | -     | -     | -    | -    | 18.73 | 5.38 | 7.29 | 10.90 | 58.20 | -        | 90587.92 |
| 2016 | 61.68 | 54.02 | 7.66 | 391.13 | -     | -    | -     | -     | -     | -    | -    | 19.01 | 5.40 | -    | -     | -     | -        | 90593.48 |
| 2017 | 62.37 | 54.20 | 8.16 | -      | -     | -    | -     | -     | -     | -    | -    | -     | -    | -    | -     | -     | -        | -        |

|         |      |       |       |      |         |        |      |       |       |       |      |      |       |      |      |       |       |           |          |
|---------|------|-------|-------|------|---------|--------|------|-------|-------|-------|------|------|-------|------|------|-------|-------|-----------|----------|
| Nigeria | 1995 | 54.68 | 47.16 | 7.52 | 1242.74 | 37.68  | 2.77 | 94.55 | 72.09 | 23.76 | 0.66 | 2.11 | 32.21 | 5.43 | 6.26 | 36.00 | 46.00 | 184046.20 | 91382.98 |
|         | 1996 | 54.45 | 46.98 | 7.47 | 1272.73 | 53.95  | 2.92 | 94.74 | 75.23 | 20.59 | 0.60 | 2.32 | 32.73 | 5.43 | 6.22 | 35.60 | 47.20 | 203140.48 | 91375.81 |
|         | 1997 | 54.65 | 47.16 | 7.49 | 1276.24 | 54.64  | 2.92 | 94.59 | 71.31 | 24.61 | 0.72 | 2.20 | 33.25 | 5.41 | 6.19 | 35.20 | 48.30 | 196351.83 | 91364.78 |
|         | 1998 | 54.61 | 47.12 | 7.48 | 1278.65 | 61.42  | 3.47 | 95.00 | 70.17 | 26.14 | 0.91 | 2.56 | 33.77 | 5.37 | 6.16 | 34.80 | 49.50 | 332361.06 | 91365.63 |
|         | 1999 | 54.77 | 47.24 | 7.53 | 1253.05 | 16.26  | 3.38 | 94.76 | 67.16 | 29.12 | 0.98 | 2.39 | 34.30 | 5.31 | 6.13 | 34.40 | 50.60 | 353503.93 | 91362.96 |
|         | 2000 | 54.89 | 47.32 | 7.57 | 1287.06 | 17.22  | 2.84 | 92.65 | 61.65 | 33.46 | 0.95 | 1.89 | 34.84 | 5.25 | 6.11 | 34.00 | 51.80 | 314978.54 | 91359.60 |
|         | 2001 | 55.12 | 47.55 | 7.57 | 1310.51 | 18.28  | 3.25 | 91.39 | 62.74 | 31.35 | 1.02 | 2.23 | 35.67 | 5.26 | 6.08 | 33.70 | 53.00 | 319145.79 | 91311.25 |
|         | 2002 | 55.13 | 47.59 | 7.54 | 1326.24 | 17.89  | 2.43 | 90.43 | 67.30 | 25.58 | 0.62 | 1.81 | 36.51 | 5.24 | 6.06 | 33.30 | 54.20 | 295068.36 | 91271.57 |
|         | 2003 | 55.57 | 47.98 | 7.59 | 1426.90 | 38.50  | 4.05 | 96.22 | 74.66 | 22.40 | 0.91 | 3.14 | 37.36 | 5.21 | 6.04 | 32.90 | 55.40 | 314942.19 | 91235.53 |
|         | 2004 | 56.11 | 48.44 | 7.67 | 1860.06 | 44.94  | 4.33 | 95.34 | 64.17 | 32.69 | 1.41 | 2.91 | 38.21 | 5.17 | 6.01 | 32.60 | 56.60 | 288145.57 | 91202.06 |
|         | 2005 | 56.84 | 49.06 | 7.78 | 1875.03 | 53.09  | 4.11 | 95.80 | 67.86 | 29.17 | 1.20 | 2.91 | 39.07 | 5.11 | 5.99 | 32.20 | 57.80 | 374421.70 | 91171.72 |
|         | 2006 | 57.47 | 49.62 | 7.85 | 1976.71 | 61.01  | 3.66 | 95.62 | 64.12 | 32.94 | 1.20 | 2.45 | 39.94 | 5.15 | 5.96 | 31.90 | 59.00 | 318579.09 | 91116.97 |
|         | 2007 | 58.20 | 50.25 | 7.95 | 2056.84 | 81.37  | 4.47 | 95.83 | 32.92 | 32.92 | 1.47 | 3.00 | 40.82 | 5.18 | 5.93 | 31.50 | 60.10 | 335201.39 | 91058.15 |
|         | 2008 | 59.00 | 50.92 | 8.08 | 2128.67 | 88.52  | 4.00 | 95.66 | 60.48 | 36.77 | 1.47 | 2.53 | 41.70 | 5.18 | 5.90 | 31.20 | 61.20 | 316058.63 | 91022.84 |
|         | 2009 | 59.74 | 51.55 | 8.19 | 2216.50 | 74.36  | 4.24 | 95.80 | 65.83 | 31.28 | 1.32 | 2.91 | 42.59 | 5.17 | 5.87 | 30.80 | 62.30 | 273156.36 | 90970.45 |
|         | 2010 | 60.52 | 52.22 | 8.29 | 2327.32 | 80.34  | 3.47 | 95.67 | 70.62 | 26.18 | 0.91 | 2.56 | 43.48 | 5.14 | 5.84 | 30.50 | 63.40 | 292211.74 | 90944.70 |
|         | 2011 | 61.27 | 52.89 | 8.38 | 2376.64 | 93.23  | 3.69 | 95.66 | 65.78 | 31.23 | 1.15 | 2.54 | 44.36 | 5.18 | 5.80 | 30.20 | 64.50 | 296799.95 | 90896.74 |
|         | 2012 | 61.93 | 53.49 | 8.44 | 2412.86 | 90.39  | 3.30 | 95.53 | 65.61 | 31.32 | 1.03 | 2.27 | 45.23 | 5.20 | 5.76 | 29.90 | 65.50 | 301010.13 | 90858.42 |
|         | 2013 | 62.50 | 54.02 | 8.49 | 2475.95 | 110.37 | 3.70 | 95.77 | 72.95 | 23.83 | 0.88 | 2.82 | 46.09 | 5.20 | 5.71 | 29.60 | 66.60 | -         | 90828.56 |
|         | 2014 | 62.97 | 54.46 | 8.52 | 2563.09 | 117.52 | 3.67 | 95.74 | 71.67 | 25.15 | 0.92 | 2.75 | 46.94 | 5.18 | 5.65 | 29.30 | 67.60 | -         | 90803.94 |

|                          |      |       |       |       |          |         |      |       |       |       |      |      |       |       |      |       |        |          |          |          |
|--------------------------|------|-------|-------|-------|----------|---------|------|-------|-------|-------|------|------|-------|-------|------|-------|--------|----------|----------|----------|
|                          | 2015 | 64.02 | 55.37 | 8.65  | 2562.52  | -       | -    | -     | -     | -     | -    | -    | -     | 47.78 | 5.15 | 5.59  | 29.00  | 68.50    | -        | 90793.98 |
|                          | 2016 | 65.02 | 56.28 | 8.74  | 2455.92  | -       | -    | -     | -     | -     | -    | -    | -     | 48.60 | 5.17 | -     | -      | -        | -        | 90785.84 |
|                          | 2017 | 64.35 | 55.10 | 9.25  | -        | -       | -    | -     | -     | -     | -    | -    | -     | -     | -    | -     | -      | -        | -        | -        |
| Northern Mariana Islands | 1995 | 75.22 | 65.89 | 9.33  | -        | -       | -    | -     | -     | -     | -    | -    | -     | 89.56 | -    | -     | 71.20  | 94.80    | 6.56     | 83754.75 |
|                          | 1996 | 75.42 | 66.04 | 9.38  | -        | -       | -    | -     | -     | -     | -    | -    | -     | 89.66 | -    | -     | 71.70  | 94.90    | 6.93     | 83695.17 |
|                          | 1997 | 75.60 | 66.17 | 9.43  | -        | -       | -    | -     | -     | -     | -    | -    | -     | 89.78 | -    | -     | 72.20  | 95.10    | 7.32     | 83679.67 |
|                          | 1998 | 75.74 | 66.27 | 9.47  | -        | -       | -    | -     | -     | -     | -    | -    | -     | 89.91 | -    | -     | 72.70  | 95.30    | 7.70     | 83698.12 |
|                          | 1999 | 75.91 | 66.40 | 9.51  | -        | -       | -    | -     | -     | -     | -    | -    | -     | 90.04 | -    | -     | 73.20  | 95.40    | 8.09     | 83732.79 |
|                          | 2000 | 76.14 | 66.58 | 9.56  | -        | -       | -    | -     | -     | -     | -    | -    | -     | 90.12 | -    | -     | 73.70  | 95.60    | 8.47     | 83798.83 |
|                          | 2001 | 76.14 | 66.55 | 9.58  | -        | -       | -    | -     | -     | -     | -    | -    | -     | 90.05 | -    | -     | 74.20  | 95.80    | 8.85     | 83895.84 |
|                          | 2002 | 76.17 | 66.57 | 9.60  | 21177.70 | -       | -    | -     | -     | -     | -    | -    | -     | 89.99 | -    | -     | 74.70  | 95.90    | 9.22     | 84000.37 |
|                          | 2003 | 76.25 | 66.62 | 9.63  | 21687.13 | -       | -    | -     | -     | -     | -    | -    | -     | 89.93 | -    | -     | 75.20  | 96.10    | 9.59     | 84115.41 |
|                          | 2004 | 76.26 | 66.61 | 9.65  | 21573.63 | -       | -    | -     | -     | -     | -    | -    | -     | 89.86 | -    | -     | 75.70  | 96.20    | 9.96     | 84220.70 |
|                          | 2005 | 76.15 | 66.54 | 9.60  | 19408.28 | -       | -    | -     | -     | -     | -    | -    | -     | 89.80 | -    | -     | 76.20  | 96.40    | 10.33    | 84356.99 |
|                          | 2006 | 76.18 | 66.58 | 9.60  | 18673.13 | -       | -    | -     | -     | -     | -    | -    | -     | 89.74 | -    | -     | 76.70  | 96.60    | 10.65    | 84540.00 |
|                          | 2007 | 76.12 | 66.49 | 9.63  | 18056.32 | -       | -    | -     | -     | -     | -    | -    | -     | 89.67 | -    | -     | 77.20  | 96.70    | 11.00    | 84745.84 |
|                          | 2008 | 76.06 | 66.43 | 9.63  | 16639.58 | -       | -    | -     | -     | -     | -    | -    | -     | 89.61 | -    | -     | 77.70  | 96.90    | 11.38    | 84947.41 |
|                          | 2009 | 75.91 | 66.31 | 9.60  | 14155.54 | -       | -    | -     | -     | -     | -    | -    | -     | 89.54 | -    | -     | 78.20  | 97.10    | 11.80    | 85144.59 |
|                          | 2010 | 75.90 | 66.32 | 9.58  | 14681.02 | -       | -    | -     | -     | -     | -    | -    | -     | 89.47 | -    | -     | 78.70  | 97.20    | 12.24    | 85377.37 |
|                          | 2011 | 75.75 | 66.16 | 9.59  | 13712.46 | -       | -    | -     | -     | -     | -    | -    | -     | 89.41 | -    | -     | 79.20  | 97.40    | 12.37    | 85586.11 |
|                          | 2012 | 75.63 | 66.05 | 9.58  | 13803.64 | -       | -    | -     | -     | -     | -    | -    | -     | 89.36 | -    | -     | 79.70  | 97.50    | 12.49    | 85813.45 |
|                          | 2013 | 75.50 | 65.93 | 9.57  | 14089.31 | -       | -    | -     | -     | -     | -    | -    | -     | 89.31 | -    | -     | 79.70  | 97.50    | -        | 86032.73 |
|                          | 2014 | 75.40 | 65.83 | 9.57  | 14468.96 | -       | -    | -     | -     | -     | -    | -    | -     | 89.27 | -    | -     | 79.70  | 97.50    | -        | 86251.58 |
|                          | 2015 | 75.36 | 65.77 | 9.59  | 14919.64 | -       | -    | -     | -     | -     | -    | -    | -     | 89.24 | -    | -     | 79.70  | 97.50    | -        | 86475.20 |
|                          | 2016 | 75.47 | 65.86 | 9.61  | 19115.38 | -       | -    | -     | -     | -     | -    | -    | -     | 89.21 | -    | -     | -      | -        | -        | 86693.87 |
|                          | 2017 | 76.20 | 66.13 | 10.07 | -        | -       | -    | -     | -     | -     | -    | -    | -     | -     | -    | -     | -      | -        | -        | -        |
| Norway                   | 1995 | 77.94 | 67.99 | 9.95  | 70457.69 | 2698.13 | 7.72 | 96.50 | 15.22 | 84.23 | 6.50 | 1.22 | 73.76 | 24.81 | 1.87 | 98.10 | 100.00 | 70569.10 | 89493.88 |          |
|                          | 1996 | 78.21 | 68.23 | 9.98  | 73626.16 | 2868.62 | 7.67 | 96.48 | 15.27 | 84.17 | 6.45 | 1.21 | 74.04 | 24.63 | 1.89 | 98.10 | 100.00 | 72016.75 | 89429.29 |          |
|                          | 1997 | 78.34 | 68.35 | 9.99  | 77097.89 | 3025.91 | 8.24 | 95.41 | 17.83 | 81.31 | 6.70 | 1.54 | 74.31 | 24.40 | 1.86 | 98.10 | 100.00 | 74552.49 | 89391.12 |          |

|      |       |       |       |          |         |      |       |       |       |      |      |       |       |      |       |        |          |          |
|------|-------|-------|-------|----------|---------|------|-------|-------|-------|------|------|-------|-------|------|-------|--------|----------|----------|
| 1998 | 78.42 | 68.42 | 9.99  | 78651.55 | 3165.81 | 9.07 | 95.35 | 16.98 | 82.19 | 7.45 | 1.62 | 74.38 | 24.14 | 1.81 | 98.10 | 100.00 | 74639.79 | 89377.66 |
| 1999 | 78.53 | 68.52 | 10.01 | 79687.51 | 3337.84 | 9.14 | 95.37 | 16.63 | 82.56 | 7.55 | 1.59 | 75.09 | 23.86 | 1.85 | 98.10 | 100.00 | 76295.63 | 89378.73 |
| 2000 | 78.74 | 68.68 | 10.06 | 81709.66 | 3164.81 | 8.27 | 95.48 | 16.72 | 82.49 | 6.82 | 1.45 | 76.08 | 23.56 | 1.85 | 98.10 | 100.00 | 71217.90 | 89405.87 |
| 2001 | 78.94 | 68.86 | 10.07 | 82992.53 | 3340.80 | 8.65 | 95.67 | 15.73 | 83.56 | 7.22 | 1.42 | 76.56 | 23.34 | 1.78 | 98.10 | 100.00 | 71491.23 | 89460.87 |
| 2002 | 79.14 | 69.05 | 10.09 | 83732.94 | 4153.81 | 9.62 | 95.36 | 15.76 | 83.48 | 8.03 | 1.59 | 77.00 | 23.11 | 1.75 | 98.10 | 100.00 | 69689.53 | 89519.69 |
| 2003 | 79.50 | 69.34 | 10.16 | 84008.96 | 4951.23 | 9.85 | 95.33 | 15.53 | 83.71 | 8.25 | 1.61 | 77.23 | 22.89 | 1.80 | 98.10 | 100.00 | 73172.63 | 89593.53 |
| 2004 | 79.87 | 69.64 | 10.22 | 86820.34 | 5452.96 | 9.44 | 95.31 | 15.67 | 83.56 | 7.89 | 1.55 | 77.28 | 22.71 | 1.83 | 98.10 | 100.00 | 73534.99 | 89669.53 |
| 2005 | 80.17 | 69.87 | 10.29 | 88494.36 | 5961.32 | 8.89 | 95.15 | 15.66 | 83.54 | 7.43 | 1.46 | 77.49 | 22.59 | 1.84 | 98.10 | 100.00 | 71578.06 | 89759.97 |
| 2006 | 80.40 | 70.07 | 10.34 | 89887.02 | 6276.09 | 8.43 | 95.23 | 15.45 | 83.78 | 7.06 | 1.37 | 77.89 | 22.45 | 1.90 | 98.10 | 100.00 | 71355.50 | 89791.04 |
| 2007 | 80.56 | 70.20 | 10.36 | 91617.28 | 7351.79 | 8.58 | 94.79 | 84.10 | 84.10 | 7.22 | 1.37 | 78.23 | 22.33 | 1.90 | 98.10 | 100.00 | 72404.47 | 89825.44 |
| 2008 | 80.73 | 70.34 | 10.39 | 90917.54 | 8193.61 | 8.40 | 95.46 | 14.84 | 84.40 | 7.09 | 1.31 | 78.53 | 22.27 | 1.96 | 98.10 | 100.00 | 71002.76 | 89848.49 |
| 2009 | 80.89 | 70.46 | 10.44 | 88259.97 | 7637.20 | 9.49 | 94.81 | 14.59 | 84.57 | 8.02 | 1.46 | 78.82 | 22.30 | 1.98 | 98.10 | 100.00 | 65840.66 | 89884.95 |
| 2010 | 81.08 | 70.59 | 10.49 | 87770.27 | 8164.47 | 9.26 | 94.96 | 14.49 | 84.70 | 7.84 | 1.41 | 79.10 | 22.45 | 1.95 | 98.10 | 100.00 | 65710.06 | 89937.62 |
| 2011 | 81.26 | 70.76 | 10.50 | 87481.15 | 9249.83 | 9.14 | 94.27 | 14.64 | 84.48 | 7.72 | 1.42 | 79.39 | 22.82 | 1.88 | 98.10 | 100.00 | 64181.15 | 89950.80 |
| 2012 | 81.50 | 70.97 | 10.53 | 88689.49 | 9360.77 | 9.16 | 93.90 | 14.18 | 84.90 | 7.77 | 1.38 | 79.67 | 23.30 | 1.85 | 98.10 | 100.00 | 63536.73 | 89974.23 |
| 2013 | 81.75 | 71.18 | 10.58 | 88538.70 | 9719.99 | 9.39 | 93.92 | 13.86 | 85.24 | 8.01 | 1.39 | 79.94 | 23.84 | 1.78 | 98.10 | 100.00 | -        | 90010.39 |
| 2014 | 82.03 | 71.40 | 10.63 | 89274.96 | 9522.22 | 9.72 | 93.80 | 13.61 | 85.49 | 8.31 | 1.41 | 80.21 | 24.36 | 1.75 | 98.10 | 100.00 | -        | 90058.31 |
| 2015 | 82.09 | 71.47 | 10.62 | 90132.39 | -       | -    | -     | -     | -     | -    | -    | 80.47 | 24.80 | 1.75 | 98.10 | 100.00 | -        | 90091.98 |
| 2016 | 82.10 | 71.49 | 10.61 | 90344.41 | -       | -    | -     | -     | -     | -    | -    | 80.73 | 25.30 | -    | -     | -      | -        | 90118.17 |
| 2017 | 82.34 | 70.24 | 12.10 | -        | -       | -    | -     | -     | -     | -    | -    | -     | -     | -    | -     | -      | -        | -        |

|      |      |       |       |       |          |        |      |       |       |       |      |      |       |      |      |       |       |          |          |
|------|------|-------|-------|-------|----------|--------|------|-------|-------|-------|------|------|-------|------|------|-------|-------|----------|----------|
| Oman | 1995 | 72.67 | 62.32 | 10.35 | 16295.73 | 227.09 | 3.65 | 63.24 | 10.17 | 83.92 | 3.06 | 0.59 | 71.67 | 3.55 | 5.35 | 84.80 | 80.30 | 41448.64 | 89853.69 |
|      | 1996 | 73.03 | 62.67 | 10.37 | 16548.97 | 242.12 | 3.56 | 63.00 | 10.15 | 83.90 | 2.98 | 0.57 | 71.65 | 3.64 | 4.98 | 85.70 | 81.10 | 43219.73 | 89757.94 |
|      | 1997 | 73.42 | 63.02 | 10.40 | 17445.23 | 235.92 | 3.36 | 63.00 | 10.76 | 82.93 | 2.78 | 0.57 | 71.63 | 3.73 | 4.63 | 86.50 | 81.80 | 44902.25 | 89653.45 |
|      | 1998 | 73.78 | 63.34 | 10.44 | 17889.47 | 231.72 | 3.70 | 64.44 | 11.89 | 81.56 | 3.02 | 0.68 | 71.61 | 3.82 | 4.30 | 87.30 | 82.50 | 27560.65 | 89533.03 |
|      | 1999 | 74.13 | 63.65 | 10.48 | 17843.04 | 247.32 | 3.54 | 64.99 | 11.92 | 81.66 | 2.89 | 0.65 | 71.59 | 3.92 | 3.99 | 88.20 | 83.30 | 30791.43 | 89414.78 |
|      | 2000 | 74.40 | 63.91 | 10.49 | 18698.40 | 266.88 | 3.07 | 64.39 | 11.75 | 81.75 | 2.51 | 0.56 | 71.57 | 4.02 | 3.72 | 89.00 | 84.00 | 35439.11 | 89310.32 |
|      | 2001 | 74.62 | 64.10 | 10.52 | 19308.42 | 263.89 | 3.08 | 62.69 | 11.27 | 82.03 | 2.53 | 0.55 | 71.55 | 4.05 | 3.48 | 89.80 | 84.70 | 40680.09 | 89286.68 |
|      | 2002 | 74.81 | 64.28 | 10.53 | 18772.80 | 275.76 | 3.18 | 61.40 | 10.15 | 83.47 | 2.65 | 0.53 | 71.53 | 4.06 | 3.29 | 90.70 | 85.50 | 43297.51 | 89307.71 |
|      | 2003 | 75.03 | 64.47 | 10.55 | 17881.31 | 287.80 | 3.17 | 61.76 | 10.58 | 82.87 | 2.63 | 0.54 | 71.51 | 4.05 | 3.14 | 91.50 | 86.20 | 46464.79 | 89376.93 |

|      |       |       |       |          |        |      |       |       |       |      |      |       |      |      |       |       |          |          |
|------|-------|-------|-------|----------|--------|------|-------|-------|-------|------|------|-------|------|------|-------|-------|----------|----------|
| 2004 | 75.43 | 64.80 | 10.63 | 17671.58 | 301.00 | 2.98 | 61.65 | 11.15 | 81.91 | 2.44 | 0.54 | 71.83 | 4.02 | 3.03 | 92.40 | 87.00 | 46069.20 | 89454.65 |
| 2005 | 75.78 | 65.12 | 10.66 | 17631.94 | 320.77 | 2.59 | 59.74 | 10.55 | 82.34 | 2.13 | 0.46 | 72.40 | 3.98 | 2.95 | 93.30 | 87.80 | 48099.66 | 89541.06 |
| 2006 | 75.89 | 65.23 | 10.66 | 18063.25 | 336.81 | 2.31 | 59.44 | 11.48 | 80.69 | 1.86 | 0.45 | 72.97 | 3.92 | 2.91 | 94.20 | 88.60 | 50886.20 | 89680.10 |
| 2007 | 75.90 | 65.21 | 10.69 | 18302.32 | 393.60 | 2.43 | 59.76 | 81.14 | 81.14 | 1.97 | 0.46 | 73.53 | 3.88 | 2.89 | 95.00 | 89.40 | 52515.09 | 89806.64 |
| 2008 | 76.15 | 65.39 | 10.76 | 19112.20 | 462.07 | 2.01 | 58.82 | 12.45 | 78.83 | 1.59 | 0.43 | 74.08 | 3.85 | 2.89 | 95.90 | 90.10 | 55220.80 | 89958.50 |
| 2009 | 75.96 | 65.27 | 10.69 | 19408.63 | 495.79 | 2.83 | 61.47 | 11.50 | 81.30 | 2.30 | 0.53 | 74.62 | 3.81 | 2.90 | 96.70 | 90.90 | 55510.21 | 90157.64 |
| 2010 | 75.75 | 65.17 | 10.58 | 19280.75 | 546.64 | 2.74 | 60.20 | 10.41 | 82.71 | 2.27 | 0.47 | 75.16 | 3.75 | 2.90 | 96.70 | 91.70 | 59041.98 | 90405.78 |
| 2011 | 75.94 | 65.31 | 10.63 | 17914.03 | 539.86 | 2.49 | 59.63 | 10.84 | 81.82 | 2.04 | 0.45 | 75.69 | 3.56 | 2.90 | 96.70 | 92.50 | 60705.59 | 90695.72 |
| 2012 | 76.24 | 65.56 | 10.68 | 18300.33 | 551.58 | 2.52 | 59.35 | 10.43 | 82.43 | 2.08 | 0.44 | 76.20 | 3.37 | 2.88 | 96.70 | 93.30 | 62201.55 | 91004.25 |
| 2013 | 76.40 | 65.70 | 10.70 | 17830.35 | 562.89 | 2.76 | 55.97 | 7.14  | 87.24 | 2.41 | 0.35 | 76.70 | 3.22 | 2.85 | 96.70 | 93.30 | -        | 91278.14 |
| 2014 | 76.58 | 65.86 | 10.72 | 17132.09 | 675.04 | 3.55 | 56.49 | 5.78  | 89.77 | 3.19 | 0.36 | 77.18 | 3.12 | 2.80 | 96.70 | 93.40 | -        | 91492.58 |
| 2015 | 76.78 | 66.02 | 10.76 | 17070.96 | -      | -    | -     | -     | -     | -    | -    | 77.64 | 3.06 | 2.74 | 96.70 | 93.40 | -        | 91668.41 |
| 2016 | 76.97 | 66.20 | 10.76 | -        | -      | -    | -     | -     | -     | -    | -    | 78.09 | 3.08 | -    | -     | -     | -        | 91748.22 |
| 2017 | 77.10 | 65.82 | 11.28 | -        | -      | -    | -     | -     | -     | -    | -    | -     | -    | -    | -     | -     | -        | -        |

|          |      |       |       |      |         |       |      |       |       |       |      |      |       |      |      |       |       |           |          |
|----------|------|-------|-------|------|---------|-------|------|-------|-------|-------|------|------|-------|------|------|-------|-------|-----------|----------|
| Pakistan | 1995 | 61.95 | 53.84 | 8.12 | 815.34  | 15.78 | 2.50 | 97.65 | 72.09 | 26.18 | 0.66 | 1.85 | 31.84 | 7.47 | 5.34 | 27.80 | 87.40 | 209249.97 | 84679.01 |
|          | 1996 | 62.10 | 54.00 | 8.10 | 833.75  | 15.77 | 2.57 | 97.66 | 70.53 | 27.78 | 0.72 | 1.86 | 32.09 | 7.49 | 5.20 | 29.60 | 87.60 | 220080.40 | 84705.67 |
|          | 1997 | 62.07 | 54.00 | 8.07 | 821.66  | 15.41 | 2.57 | 97.71 | 72.74 | 25.56 | 0.66 | 1.91 | 32.35 | 7.49 | 5.05 | 31.40 | 87.80 | 225905.90 | 84789.87 |
|          | 1998 | 62.28 | 54.19 | 8.09 | 822.44  | 16.22 | 2.75 | 82.45 | 65.31 | 20.78 | 0.57 | 2.18 | 32.61 | 7.49 | 4.89 | 33.20 | 88.10 | 234307.76 | 84889.09 |
|          | 1999 | 62.44 | 54.33 | 8.11 | 832.70  | 16.30 | 2.83 | 82.82 | 66.60 | 19.59 | 0.55 | 2.28 | 32.87 | 7.48 | 4.73 | 35.00 | 88.30 | 246612.07 | 85010.14 |
|          | 2000 | 62.61 | 54.48 | 8.13 | 848.63  | 15.50 | 2.79 | 81.49 | 63.70 | 21.83 | 0.61 | 2.18 | 33.16 | 7.46 | 4.58 | 36.90 | 88.50 | 247348.80 | 85133.82 |
|          | 2001 | 62.76 | 54.60 | 8.16 | 846.64  | 13.53 | 2.61 | 79.12 | 62.39 | 21.15 | 0.55 | 2.06 | 33.45 | 7.45 | 4.44 | 38.70 | 88.70 | 250584.71 | 85115.00 |
|          | 2002 | 62.93 | 54.73 | 8.20 | 855.50  | 15.39 | 2.76 | 79.39 | 56.14 | 29.29 | 0.81 | 1.95 | 33.75 | 7.44 | 4.31 | 40.50 | 88.90 | 256954.14 | 85121.25 |
|          | 2003 | 63.09 | 54.84 | 8.25 | 878.44  | 16.12 | 2.61 | 81.27 | 61.08 | 24.85 | 0.65 | 1.96 | 34.07 | 7.41 | 4.21 | 42.30 | 89.10 | 271615.15 | 85105.40 |
|          | 2004 | 63.35 | 55.04 | 8.32 | 923.92  | 17.76 | 2.56 | 82.37 | 60.56 | 26.48 | 0.68 | 1.88 | 34.39 | 7.39 | 4.13 | 44.10 | 89.30 | 291014.02 | 85138.88 |
|          | 2005 | 62.52 | 54.32 | 8.21 | 974.54  | 22.36 | 2.91 | 86.34 | 66.01 | 23.54 | 0.69 | 2.23 | 34.73 | 7.38 | 4.07 | 45.90 | 89.50 | 299134.72 | 85151.36 |
|          | 2006 | 64.01 | 55.56 | 8.45 | 1013.77 | 29.63 | 3.40 | 89.79 | 68.97 | 23.19 | 0.79 | 2.61 | 35.08 | 7.40 | 4.02 | 47.60 | 89.70 | 314154.54 | 85216.99 |
|          | 2007 | 64.35 | 55.85 | 8.51 | 1041.29 | 31.93 | 3.35 | 88.98 | 23.82 | 23.82 | 0.80 | 2.55 | 35.44 | 7.42 | 3.98 | 49.40 | 89.90 | 336409.91 | 85275.33 |
|          | 2008 | 64.65 | 56.09 | 8.56 | 1037.58 | 30.19 | 3.26 | 88.31 | 65.57 | 25.75 | 0.84 | 2.42 | 35.82 | 7.44 | 3.94 | 51.20 | 90.10 | 338551.92 | 85316.57 |
|          | 2009 | 64.97 | 56.35 | 8.61 | 1045.21 | 28.51 | 2.94 | 88.50 | 64.32 | 27.32 | 0.80 | 2.14 | 36.20 | 7.44 | 3.90 | 53.00 | 90.30 | 343244.20 | 85352.13 |

|      |       |       |      |         |       |      |       |       |       |      |      |       |      |      |       |       |           |          |
|------|-------|-------|------|---------|-------|------|-------|-------|-------|------|------|-------|------|------|-------|-------|-----------|----------|
| 2010 | 65.29 | 56.62 | 8.67 | 1040.14 | 30.95 | 3.02 | 88.65 | 60.61 | 31.64 | 0.95 | 2.06 | 36.60 | 7.44 | 3.86 | 54.80 | 90.50 | 354528.62 | 85401.15 |
| 2011 | 65.73 | 56.99 | 8.74 | 1046.49 | 36.66 | 3.01 | 88.59 | 61.49 | 30.59 | 0.92 | 2.09 | 37.01 | 7.45 | 3.80 | 56.50 | 90.70 | 362475.09 | 85417.27 |
| 2012 | 66.08 | 57.30 | 8.78 | 1060.50 | 33.47 | 2.76 | 86.79 | 54.76 | 36.90 | 1.02 | 1.74 | 37.43 | 7.45 | 3.74 | 58.30 | 90.90 | 369734.58 | 85445.05 |
| 2013 | 66.46 | 57.63 | 8.83 | 1083.97 | 33.64 | 2.70 | 86.79 | 54.87 | 36.77 | 0.99 | 1.71 | 37.86 | 7.45 | 3.68 | 60.00 | 91.10 | -         | 85508.64 |
| 2014 | 66.83 | 57.94 | 8.88 | 1111.20 | 36.15 | 2.61 | 86.79 | 56.28 | 35.15 | 0.92 | 1.70 | 38.30 | 7.43 | 3.62 | 61.80 | 91.30 | -         | 85599.24 |
| 2015 | 67.21 | 58.27 | 8.94 | 1140.21 | -     | -    | -     | -     | -     | -    | -    | 38.76 | 7.41 | 3.55 | 63.50 | 91.40 | -         | 85742.65 |
| 2016 | 67.61 | 58.63 | 8.98 | 1178.80 | -     | -    | -     | -     | -     | -    | -    | 39.22 | 7.41 | -    | -     | -     | -         | 85911.81 |
| 2017 | 66.85 | 58.00 | 8.85 | -       | -     | -    | -     | -     | -     | -    | -    | -     | -    | -    | -     | -     | -         | -        |

|        |      |       |       |      |          |        |      |       |       |       |      |      |       |       |      |       |       |          |          |
|--------|------|-------|-------|------|----------|--------|------|-------|-------|-------|------|------|-------|-------|------|-------|-------|----------|----------|
| Panama | 1995 | 75.37 | 66.62 | 8.75 | 4741.13  | 222.93 | 7.72 | 84.10 | 26.95 | 67.96 | 5.25 | 2.47 | 58.14 | 8.33  | 2.85 | 63.00 | 86.90 | 8817.59  | 88331.35 |
|        | 1996 | 75.58 | 66.78 | 8.80 | 4834.65  | 239.58 | 7.18 | 86.22 | 30.66 | 64.44 | 4.63 | 2.55 | 58.98 | 8.41  | 2.83 | 63.80 | 87.40 | 8891.11  | 88321.72 |
|        | 1997 | 75.79 | 66.95 | 8.84 | 5043.14  | 251.69 | 7.12 | 83.75 | 26.41 | 68.47 | 4.88 | 2.25 | 59.81 | 8.50  | 2.81 | 64.60 | 88.00 | 8870.50  | 88322.48 |
|        | 1998 | 76.06 | 67.16 | 8.89 | 5304.85  | 266.09 | 7.09 | 83.33 | 27.74 | 66.71 | 4.73 | 2.36 | 60.63 | 8.60  | 2.79 | 65.30 | 88.50 | 10070.74 | 88338.01 |
|        | 1999 | 76.41 | 67.44 | 8.98 | 5403.43  | 264.39 | 6.85 | 81.87 | 27.61 | 66.28 | 4.54 | 2.31 | 61.45 | 8.71  | 2.77 | 66.10 | 89.00 | 8736.71  | 88379.01 |
|        | 2000 | 76.76 | 67.72 | 9.04 | 5441.82  | 297.88 | 7.76 | 81.26 | 25.95 | 68.07 | 5.28 | 2.48 | 62.20 | 8.83  | 2.74 | 66.80 | 89.50 | 9158.75  | 88449.62 |
|        | 2001 | 76.96 | 67.87 | 9.09 | 5367.96  | 295.35 | 7.72 | 82.34 | 27.10 | 67.08 | 5.18 | 2.54 | 62.49 | 8.96  | 2.72 | 67.40 | 89.90 | 11337.66 | 88519.82 |
|        | 2002 | 77.07 | 67.97 | 9.10 | 5383.80  | 313.35 | 8.03 | 81.64 | 25.27 | 69.05 | 5.54 | 2.49 | 62.79 | 9.10  | 2.70 | 67.90 | 90.30 | 10475.86 | 88614.27 |
|        | 2003 | 77.16 | 68.04 | 9.12 | 5505.49  | 307.10 | 7.60 | 82.16 | 27.64 | 66.37 | 5.05 | 2.56 | 63.08 | 9.25  | 2.68 | 68.50 | 90.60 | 10850.46 | 88701.60 |
|        | 2004 | 77.27 | 68.14 | 9.14 | 5810.32  | 351.65 | 8.09 | 81.47 | 24.16 | 70.35 | 5.69 | 2.40 | 63.38 | 9.41  | 2.66 | 69.00 | 91.00 | 10819.01 | 88774.05 |
|        | 2005 | 77.39 | 68.25 | 9.14 | 6114.22  | 348.45 | 7.48 | 81.06 | 24.64 | 69.60 | 5.21 | 2.27 | 63.67 | 9.58  | 2.65 | 69.60 | 91.40 | 10588.62 | 88830.87 |
|        | 2006 | 77.45 | 68.29 | 9.16 | 6522.92  | 354.88 | 7.00 | 80.77 | 26.27 | 67.47 | 4.72 | 2.28 | 63.96 | 9.75  | 2.64 | 70.10 | 91.70 | 11987.78 | 88851.00 |
|        | 2007 | 77.50 | 68.30 | 9.21 | 7173.70  | 387.41 | 6.31 | 83.01 | 64.20 | 64.20 | 4.05 | 2.26 | 64.25 | 9.94  | 2.64 | 70.70 | 92.10 | 11689.15 | 88860.23 |
|        | 2008 | 77.52 | 68.29 | 9.23 | 7653.07  | 480.09 | 6.75 | 83.61 | 25.81 | 69.13 | 4.67 | 2.08 | 64.54 | 10.13 | 2.63 | 71.20 | 92.40 | 15082.59 | 88875.95 |
|        | 2009 | 77.61 | 68.35 | 9.26 | 7638.29  | 550.66 | 7.56 | 83.61 | 21.32 | 74.50 | 5.63 | 1.93 | 64.83 | 10.33 | 2.63 | 71.80 | 92.80 | 15489.51 | 88904.08 |
|        | 2010 | 77.73 | 68.45 | 9.28 | 7937.26  | 640.44 | 8.05 | 83.61 | 24.91 | 70.21 | 5.65 | 2.40 | 65.12 | 10.55 | 2.62 | 72.30 | 93.10 | 15428.76 | 88929.39 |
|        | 2011 | 77.82 | 68.50 | 9.32 | 8719.97  | 677.83 | 7.50 | 83.91 | 26.98 | 67.85 | 5.09 | 2.41 | 65.41 | 10.75 | 2.61 | 72.90 | 93.40 | 15860.46 | 88906.17 |
|        | 2012 | 77.93 | 68.59 | 9.35 | 9360.34  | 734.56 | 7.25 | 79.03 | 24.80 | 68.62 | 4.97 | 2.27 | 65.70 | 10.97 | 2.60 | 73.40 | 93.70 | 16248.77 | 88892.54 |
|        | 2013 | 78.13 | 68.74 | 9.39 | 9810.01  | 906.14 | 8.09 | 78.74 | 22.22 | 71.78 | 5.80 | 2.28 | 65.99 | 11.19 | 2.59 | 73.90 | 94.10 | -        | 88903.64 |
|        | 2014 | 78.33 | 68.89 | 9.44 | 10229.23 | 958.98 | 8.03 | 83.22 | 22.27 | 73.24 | 5.88 | 2.15 | 66.29 | 11.43 | 2.57 | 74.50 | 94.40 | -        | 88912.62 |
|        | 2015 | 78.64 | 69.13 | 9.51 | 10642.30 | -      | -    | -     | -     | -     | -    | -    | 66.59 | 11.70 | 2.54 | 75.00 | 94.70 | -        | 88953.60 |

|                  |      |       |       |       |          |        |      |       |       |       |      |      |       |       |      |       |       |           |          |
|------------------|------|-------|-------|-------|----------|--------|------|-------|-------|-------|------|------|-------|-------|------|-------|-------|-----------|----------|
|                  | 2016 | 78.92 | 69.38 | 9.54  | 10982.37 | -      | -    | -     | -     | -     | -    | -    | 66.90 | 11.96 | -    | -     | -     | -         | 89018.59 |
|                  | 2017 | 79.29 | 69.44 | 79.29 | -        | -      | -    | -     | -     | -     | -    | -    | -     | -     | -    | -     | -     | -         | -        |
| Papua New Guinea | 1995 | 56.90 | 49.90 | 7.00  | 1984.10  | 30.10  | 2.93 | 46.30 | 7.62  | 83.54 | 2.45 | 0.48 | 14.08 | 5.43  | 4.67 | 19.70 | 33.60 | 35410.12  | 86722.83 |
|                  | 1996 | 57.17 | 50.14 | 7.03  | 2083.00  | 32.95  | 3.10 | 46.50 | 7.66  | 83.52 | 2.59 | 0.51 | 13.90 | 5.47  | 4.65 | 19.60 | 33.90 | 34368.44  | 86707.51 |
|                  | 1997 | 57.34 | 50.28 | 7.06  | 1950.23  | 36.08  | 3.64 | 46.82 | 8.52  | 81.81 | 2.98 | 0.66 | 13.72 | 5.50  | 4.63 | 19.50 | 34.20 | 143275.03 | 86709.18 |
|                  | 1998 | 56.66 | 49.69 | 6.96  | 1828.39  | 28.10  | 3.81 | 46.88 | 7.91  | 83.14 | 3.17 | 0.64 | 13.55 | 5.52  | 4.60 | 19.40 | 34.50 | 8730.32   | 86703.76 |
|                  | 1999 | 57.53 | 50.43 | 7.10  | 1814.55  | 26.84  | 4.09 | 48.75 | 8.58  | 82.40 | 3.37 | 0.72 | 13.38 | 5.53  | 4.57 | 19.30 | 34.80 | 6685.11   | 86713.08 |
|                  | 2000 | 57.60 | 50.47 | 7.13  | 1724.27  | 25.94  | 3.98 | 56.05 | 10.24 | 81.74 | 3.26 | 0.73 | 13.20 | 5.53  | 4.53 | 19.20 | 35.10 | 8257.46   | 86752.59 |
|                  | 2001 | 57.58 | 50.46 | 7.12  | 1678.82  | 37.15  | 6.68 | 55.89 | 6.54  | 88.30 | 5.90 | 0.78 | 13.18 | 5.58  | 4.48 | 19.20 | 35.50 | 10359.94  | 86818.23 |
|                  | 2002 | 57.56 | 50.46 | 7.11  | 1634.36  | 41.46  | 7.69 | 55.89 | 7.07  | 87.35 | 6.72 | 0.97 | 13.16 | 5.62  | 4.42 | 19.10 | 35.90 | 84384.82  | 86886.54 |
|                  | 2003 | 57.56 | 50.45 | 7.11  | 1628.50  | 43.55  | 6.79 | 55.89 | 6.31  | 88.70 | 6.02 | 0.77 | 13.15 | 5.65  | 4.37 | 19.10 | 36.30 | 10217.69  | 86964.11 |
|                  | 2004 | 57.56 | 50.45 | 7.11  | 1631.87  | 59.01  | 8.39 | 55.89 | 5.27  | 90.57 | 7.60 | 0.79 | 13.13 | 5.67  | 4.32 | 19.10 | 36.70 | 19650.16  | 87075.86 |
|                  | 2005 | 57.61 | 50.48 | 7.13  | 1693.31  | 51.29  | 6.42 | 55.89 | 8.23  | 85.27 | 5.47 | 0.95 | 13.11 | 5.69  | 4.26 | 19.10 | 37.10 | 9453.03   | 87169.99 |
|                  | 2006 | 57.71 | 50.57 | 7.14  | 1690.52  | 52.47  | 5.92 | 55.89 | 8.12  | 85.47 | 5.06 | 0.86 | 13.09 | 5.74  | 4.21 | 19.10 | 37.50 | 14195.87  | 87244.45 |
|                  | 2007 | 57.87 | 50.71 | 7.15  | 1833.46  | 40.08  | 4.04 | 55.89 | 77.38 | 77.38 | 3.12 | 0.91 | 13.07 | 5.78  | 4.16 | 19.00 | 37.90 | 9773.24   | 87318.73 |
|                  | 2008 | 58.17 | 50.96 | 7.21  | 1785.17  | 49.61  | 4.06 | 55.89 | 13.51 | 75.82 | 3.08 | 0.98 | 13.06 | 5.82  | 4.10 | 19.00 | 38.30 | 9516.47   | 87390.68 |
|                  | 2009 | 58.39 | 51.14 | 7.25  | 1862.56  | 52.76  | 4.36 | 55.89 | 14.58 | 73.91 | 3.22 | 1.14 | 13.04 | 5.85  | 4.04 | 19.00 | 38.70 | 11298.73  | 87493.63 |
|                  | 2010 | 58.66 | 51.35 | 7.31  | 2004.82  | 59.25  | 4.18 | 55.89 | 13.28 | 76.24 | 3.18 | 0.99 | 13.02 | 5.87  | 3.99 | 19.00 | 39.10 | 10667.60  | 87576.19 |
|                  | 2011 | 59.00 | 51.64 | 7.36  | 1982.09  | 90.89  | 4.94 | 55.89 | 10.19 | 81.76 | 4.04 | 0.90 | 13.00 | 5.92  | 3.93 | 18.90 | 39.50 | 10888.09  | 87637.79 |
|                  | 2012 | 59.25 | 51.86 | 7.39  | 2029.31  | 97.88  | 4.55 | 55.89 | 11.02 | 80.29 | 3.65 | 0.90 | 12.98 | 5.96  | 3.87 | 18.90 | 39.90 | 11087.46  | 87692.71 |
|                  | 2013 | 59.70 | 52.23 | 7.47  | 2061.96  | 100.77 | 4.78 | 55.89 | 10.21 | 81.74 | 3.91 | 0.87 | 12.98 | 5.99  | 3.81 | 18.90 | 39.90 | -         | 87754.97 |
|                  | 2014 | 60.08 | 52.54 | 7.54  | 2271.48  | 92.36  | 4.26 | 55.89 | 10.46 | 81.28 | 3.47 | 0.80 | 12.99 | 6.04  | 3.76 | 18.90 | 40.00 | -         | 87804.96 |
|                  | 2015 | 60.44 | 52.84 | 7.60  | 2428.78  | -      | -    | -     | -     | -     | -    | -    | 13.01 | 6.10  | 3.71 | 18.90 | 40.00 | -         | 87865.32 |
|                  | 2016 | 60.79 | 53.13 | 7.67  | 2436.18  | -      | -    | -     | -     | -     | -    | -    | 13.04 | 6.21  | -    | -     | -     | -         | 87916.05 |
|                  | 2017 | 58.50 | 50.83 | 7.66  | -        | -      | -    | -     | -     | -     | -    | -    | -     | -     | -    | -     | -     | -         | -        |
| Paraguay         | 1995 | 74.46 | 65.04 | 9.42  | 2937.58  | 112.74 | 5.92 | 90.37 | 57.87 | 35.96 | 2.13 | 3.79 | 52.13 | 7.81  | 4.11 | 60.60 | 63.60 | 60568.50  | 89474.93 |
|                  | 1996 | 74.44 | 65.02 | 9.41  | 2916.52  | 119.32 | 5.94 | 89.20 | 53.21 | 40.35 | 2.40 | 3.54 | 52.77 | 7.82  | 4.01 | 62.20 | 65.60 | 62323.21  | 89523.79 |
|                  | 1997 | 74.47 | 65.04 | 9.43  | 2973.31  | 123.88 | 6.19 | 85.32 | 51.86 | 39.22 | 2.43 | 3.76 | 53.41 | 7.80  | 3.91 | 63.80 | 67.60 | 63388.76  | 89584.27 |
|                  | 1998 | 74.45 | 65.02 | 9.44  | 2911.63  | 111.45 | 6.29 | 86.47 | 47.66 | 44.88 | 2.82 | 3.46 | 54.05 | 7.76  | 3.80 | 65.40 | 69.60 | 48081.51  | 89655.59 |

|      |       |       |       |         |        |       |       |       |       |      |      |       |      |      |       |       |           |          |
|------|-------|-------|-------|---------|--------|-------|-------|-------|-------|------|------|-------|------|------|-------|-------|-----------|----------|
| 1999 | 74.44 | 64.99 | 9.45  | 2812.38 | 109.72 | 6.79  | 83.70 | 46.36 | 44.61 | 3.03 | 3.76 | 54.69 | 7.74 | 3.68 | 67.00 | 71.50 | 136601.13 | 89743.69 |
| 2000 | 74.37 | 64.92 | 9.46  | 2692.50 | 125.20 | 8.10  | 86.61 | 52.07 | 39.88 | 3.23 | 4.87 | 55.33 | 7.74 | 3.55 | 68.50 | 73.40 | 39439.47  | 89839.77 |
| 2001 | 74.30 | 64.85 | 9.45  | 2618.73 | 107.91 | 7.61  | 84.94 | 55.33 | 34.86 | 2.65 | 4.96 | 55.97 | 7.79 | 3.43 | 70.10 | 75.30 | 86905.95  | 89934.00 |
| 2002 | 74.25 | 64.79 | 9.45  | 2569.69 | 77.75  | 6.77  | 85.60 | 58.29 | 31.90 | 2.16 | 4.61 | 56.60 | 7.85 | 3.32 | 71.60 | 77.10 | 83003.03  | 90034.83 |
| 2003 | 74.18 | 64.73 | 9.45  | 2633.24 | 70.32  | 5.99  | 84.90 | 57.24 | 32.57 | 1.95 | 4.04 | 56.89 | 7.92 | 3.21 | 73.00 | 78.80 | 83847.27  | 90143.84 |
| 2004 | 73.93 | 64.51 | 9.41  | 2694.06 | 81.37  | 5.78  | 85.24 | 55.27 | 35.17 | 2.03 | 3.75 | 57.12 | 8.00 | 3.12 | 74.40 | 80.50 | 69049.06  | 90257.62 |
| 2005 | 74.08 | 64.64 | 9.44  | 2707.97 | 91.54  | 6.07  | 85.55 | 52.38 | 38.78 | 2.36 | 3.72 | 57.35 | 8.07 | 3.04 | 75.80 | 82.10 | 90747.01  | 90352.93 |
| 2006 | 74.06 | 64.63 | 9.43  | 2796.03 | 116.32 | 6.43  | 86.02 | 51.09 | 40.61 | 2.61 | 3.82 | 57.58 | 8.17 | 2.97 | 77.20 | 83.80 | 67108.72  | 90430.19 |
| 2007 | 74.07 | 64.63 | 9.44  | 2906.44 | 148.25 | 6.41  | 86.04 | 41.99 | 41.99 | 2.69 | 3.72 | 57.81 | 8.27 | 2.91 | 78.60 | 85.40 | 138575.70 | 90515.53 |
| 2008 | 74.05 | 64.61 | 9.44  | 3049.87 | 216.15 | 7.06  | 88.90 | 54.75 | 38.41 | 2.71 | 4.35 | 58.03 | 8.37 | 2.85 | 80.00 | 87.00 | 54092.03  | 90578.91 |
| 2009 | 73.97 | 64.55 | 9.42  | 2890.34 | 237.66 | 9.14  | 90.58 | 55.91 | 38.28 | 3.50 | 5.64 | 58.26 | 8.49 | 2.79 | 81.30 | 88.70 | 46875.60  | 90662.94 |
| 2010 | 73.99 | 64.56 | 9.43  | 3225.59 | 293.83 | 9.10  | 91.52 | 57.72 | 36.93 | 3.36 | 5.74 | 58.49 | 8.61 | 2.73 | 82.70 | 90.30 | 50027.50  | 90738.37 |
| 2011 | 74.03 | 64.59 | 9.44  | 3320.79 | 375.81 | 9.42  | 91.38 | 54.86 | 39.96 | 3.77 | 5.66 | 58.71 | 8.74 | 2.68 | 84.10 | 91.90 | 50445.12  | 90804.70 |
| 2012 | 74.02 | 64.59 | 9.44  | 3235.72 | 398.44 | 10.33 | 91.38 | 50.72 | 44.50 | 4.60 | 5.74 | 58.94 | 8.88 | 2.63 | 85.40 | 93.40 | 50843.95  | 90865.50 |
| 2013 | 74.06 | 64.62 | 9.44  | 3640.52 | 469.01 | 10.49 | 91.74 | 49.94 | 45.56 | 4.78 | 5.71 | 59.17 | 9.03 | 2.58 | 86.80 | 95.00 | -         | 90926.78 |
| 2014 | 74.13 | 64.68 | 9.45  | 3761.91 | 464.09 | 9.81  | 91.31 | 49.42 | 45.87 | 4.50 | 5.31 | 59.42 | 9.22 | 2.54 | 87.80 | 96.60 | -         | 90984.74 |
| 2015 | 74.32 | 64.82 | 9.49  | 3822.86 | -      | -     | -     | -     | -     | -    | -    | 59.67 | 9.43 | 2.51 | 88.60 | 98.00 | -         | 91049.19 |
| 2016 | 74.48 | 64.96 | 9.52  | 3925.56 | -      | -     | -     | -     | -     | -    | -    | 59.92 | 9.67 | -    | -     | -     | -         | 91104.61 |
| 2017 | 76.12 | 66.05 | 10.07 | -       | -      | -     | -     | -     | -     | -    | -    | -     | -    | -    | -     | -     | -         | -        |

|      |      |       |       |      |         |        |      |       |       |       |      |      |       |      |      |       |       |          |          |
|------|------|-------|-------|------|---------|--------|------|-------|-------|-------|------|------|-------|------|------|-------|-------|----------|----------|
| Peru | 1995 | 71.20 | 62.59 | 8.62 | 3140.77 | 96.63  | 4.46 | 85.92 | 39.72 | 53.77 | 2.40 | 2.06 | 70.95 | 7.33 | 3.32 | 58.00 | 77.10 | 63406.51 | 90984.14 |
|      | 1996 | 71.87 | 63.16 | 8.72 | 3175.54 | 99.52  | 4.50 | 86.05 | 39.45 | 54.15 | 2.44 | 2.07 | 71.38 | 7.47 | 3.23 | 59.00 | 77.70 | 66878.35 | 91016.74 |
|      | 1997 | 72.55 | 63.73 | 8.82 | 3328.60 | 100.34 | 4.38 | 85.72 | 41.40 | 51.70 | 2.27 | 2.12 | 71.80 | 7.62 | 3.14 | 60.00 | 78.20 | 67172.28 | 91061.55 |
|      | 1998 | 73.28 | 64.34 | 8.94 | 3266.57 | 98.62  | 4.56 | 83.84 | 36.53 | 56.42 | 2.57 | 1.99 | 72.22 | 7.76 | 3.06 | 61.00 | 78.80 | 70299.96 | 91114.60 |
|      | 1999 | 74.12 | 65.04 | 9.08 | 3268.51 | 95.64  | 4.95 | 81.20 | 34.81 | 57.13 | 2.83 | 2.12 | 72.63 | 7.90 | 2.99 | 62.00 | 79.30 | 64302.17 | 91170.14 |
|      | 2000 | 74.81 | 65.64 | 9.17 | 3310.78 | 94.97  | 4.83 | 83.43 | 36.41 | 56.36 | 2.72 | 2.11 | 73.04 | 8.04 | 2.93 | 62.90 | 79.80 | 66574.04 | 91226.45 |
|      | 2001 | 75.39 | 66.09 | 9.30 | 3287.29 | 97.97  | 4.98 | 82.60 | 35.68 | 56.80 | 2.83 | 2.15 | 73.45 | 8.25 | 2.87 | 63.90 | 80.30 | 49674.78 | 91299.02 |
|      | 2002 | 75.90 | 66.52 | 9.38 | 3422.24 | 101.10 | 4.94 | 81.83 | 35.01 | 57.22 | 2.83 | 2.11 | 73.85 | 8.46 | 2.82 | 64.80 | 80.90 | 51029.15 | 91377.73 |
|      | 2003 | 76.29 | 66.86 | 9.43 | 3520.28 | 100.80 | 4.60 | 78.04 | 32.38 | 58.51 | 2.69 | 1.91 | 74.25 | 8.66 | 2.77 | 65.80 | 81.40 | 53092.70 | 91441.21 |
|      | 2004 | 76.70 | 67.21 | 9.50 | 3649.37 | 111.58 | 4.56 | 79.83 | 35.32 | 55.76 | 2.54 | 2.02 | 74.64 | 8.86 | 2.73 | 66.70 | 81.80 | 56438.52 | 91507.22 |

|      |       |       |       |         |        |      |       |       |       |      |      |       |       |      |       |       |          |          |
|------|-------|-------|-------|---------|--------|------|-------|-------|-------|------|------|-------|-------|------|-------|-------|----------|----------|
| 2005 | 77.11 | 67.60 | 9.51  | 3831.36 | 128.10 | 4.72 | 77.65 | 33.32 | 57.10 | 2.69 | 2.02 | 75.03 | 9.04  | 2.68 | 67.60 | 82.30 | 68557.46 | 91559.73 |
| 2006 | 77.52 | 67.95 | 9.57  | 4069.78 | 140.48 | 4.47 | 85.24 | 39.61 | 53.54 | 2.39 | 2.08 | 75.42 | 9.15  | 2.65 | 68.50 | 82.80 | 58736.85 | 91578.70 |
| 2007 | 77.72 | 68.06 | 9.66  | 4362.95 | 166.15 | 4.60 | 86.18 | 52.50 | 52.50 | 2.41 | 2.18 | 75.80 | 9.25  | 2.62 | 69.40 | 83.30 | 70911.51 | 91586.98 |
| 2008 | 77.93 | 68.24 | 9.68  | 4703.08 | 200.87 | 4.73 | 86.01 | 41.42 | 51.84 | 2.45 | 2.28 | 76.18 | 9.36  | 2.59 | 70.30 | 83.70 | 63708.12 | 91579.00 |
| 2009 | 77.87 | 68.22 | 9.65  | 4695.68 | 224.10 | 5.36 | 84.46 | 37.46 | 55.65 | 2.98 | 2.38 | 76.55 | 9.48  | 2.57 | 71.20 | 84.20 | 64753.41 | 91570.32 |
| 2010 | 77.94 | 68.37 | 9.57  | 5022.49 | 254.48 | 5.03 | 83.48 | 37.12 | 55.53 | 2.79 | 2.24 | 76.92 | 9.62  | 2.55 | 72.00 | 84.60 | 71614.29 | 91549.19 |
| 2011 | 78.17 | 68.47 | 9.69  | 5270.95 | 282.45 | 4.93 | 79.58 | 37.20 | 53.26 | 2.62 | 2.30 | 77.27 | 9.75  | 2.53 | 72.90 | 85.00 | 73289.70 | 91513.02 |
| 2012 | 78.50 | 68.74 | 9.76  | 5520.56 | 330.75 | 5.18 | 79.16 | 35.62 | 55.00 | 2.85 | 2.33 | 77.62 | 9.90  | 2.50 | 73.70 | 85.50 | 74806.96 | 91479.39 |
| 2013 | 78.91 | 69.06 | 9.85  | 5765.89 | 346.49 | 5.23 | 76.27 | 31.88 | 58.20 | 3.05 | 2.19 | 77.95 | 10.06 | 2.48 | 74.60 | 85.90 | -        | 91454.52 |
| 2014 | 79.37 | 69.42 | 9.95  | 5823.96 | 358.58 | 5.47 | 72.71 | 28.62 | 60.64 | 3.32 | 2.15 | 78.29 | 10.25 | 2.46 | 75.40 | 86.30 | -        | 91421.57 |
| 2015 | 79.56 | 69.58 | 9.98  | 5936.02 | -      | -    | -     | -     | -     | -    | -    | 78.61 | 10.46 | 2.43 | 76.20 | 86.70 | -        | 91412.18 |
| 2016 | 79.74 | 69.84 | 9.90  | 6089.40 | -      | -    | -     | -     | -     | -    | -    | 78.92 | 10.68 | -    | -     | -     | -        | 91412.32 |
| 2017 | 80.31 | 70.28 | 10.03 | -       | -      | -    | -     | -     | -     | -    | -    | -     | -     | -    | -     | -     | -        | -        |

|             |      |       |       |      |         |       |      |       |       |       |      |      |       |      |      |       |       |           |          |
|-------------|------|-------|-------|------|---------|-------|------|-------|-------|-------|------|------|-------|------|------|-------|-------|-----------|----------|
| Philippines | 1995 | 67.98 | 59.54 | 8.45 | 1506.58 | 36.61 | 3.45 | 82.72 | 50.01 | 39.53 | 1.36 | 2.09 | 48.29 | 5.40 | 4.01 | 60.50 | 85.50 | 125623.45 | 90284.87 |
|             | 1996 | 68.16 | 59.68 | 8.48 | 1558.71 | 41.08 | 3.54 | 81.75 | 48.25 | 40.98 | 1.45 | 2.09 | 48.23 | 5.43 | 3.96 | 61.10 | 85.80 | 134296.65 | 90461.54 |
|             | 1997 | 68.23 | 59.73 | 8.50 | 1603.22 | 40.80 | 3.62 | 81.62 | 46.48 | 43.05 | 1.56 | 2.06 | 48.17 | 5.47 | 3.92 | 61.80 | 86.10 | 140736.42 | 90653.52 |
|             | 1998 | 68.20 | 59.69 | 8.51 | 1559.21 | 30.94 | 3.20 | 81.13 | 46.30 | 42.93 | 1.37 | 1.83 | 48.11 | 5.52 | 3.89 | 62.50 | 86.40 | 163224.11 | 90859.66 |
|             | 1999 | 68.16 | 59.64 | 8.52 | 1572.69 | 35.15 | 3.23 | 77.64 | 43.32 | 44.20 | 1.43 | 1.80 | 48.05 | 5.56 | 3.85 | 63.20 | 86.70 | 140842.11 | 91082.88 |
|             | 2000 | 68.05 | 59.52 | 8.53 | 1607.20 | 33.37 | 3.21 | 77.25 | 40.50 | 47.57 | 1.53 | 1.68 | 47.96 | 5.59 | 3.81 | 63.80 | 87.10 | 150078.87 | 91314.83 |
|             | 2001 | 68.07 | 59.58 | 8.49 | 1618.97 | 28.72 | 3.00 | 78.55 | 43.85 | 44.17 | 1.32 | 1.67 | 47.68 | 5.65 | 3.77 | 64.50 | 87.40 | 142869.33 | 91312.54 |
|             | 2002 | 68.05 | 59.59 | 8.46 | 1643.20 | 27.93 | 2.79 | 77.97 | 46.78 | 40.01 | 1.12 | 1.67 | 47.41 | 5.71 | 3.71 | 65.10 | 87.70 | 138051.04 | 91322.88 |
|             | 2003 | 68.03 | 59.59 | 8.44 | 1689.98 | 32.84 | 3.25 | 78.43 | 46.88 | 40.23 | 1.31 | 1.94 | 47.14 | 5.76 | 3.65 | 65.80 | 88.00 | 140443.04 | 91327.21 |
|             | 2004 | 68.03 | 59.60 | 8.43 | 1768.11 | 34.87 | 3.23 | 78.63 | 46.89 | 40.37 | 1.30 | 1.93 | 46.87 | 5.80 | 3.58 | 66.40 | 88.30 | 142978.77 | 91344.05 |
|             | 2005 | 68.15 | 59.70 | 8.46 | 1818.32 | 46.83 | 3.91 | 84.25 | 51.93 | 38.37 | 1.50 | 2.41 | 46.60 | 5.85 | 3.50 | 67.10 | 88.60 | 146433.72 | 91350.85 |
|             | 2006 | 68.16 | 59.77 | 8.38 | 1880.19 | 55.13 | 3.95 | 85.30 | 53.96 | 36.75 | 1.45 | 2.50 | 46.33 | 6.02 | 3.43 | 67.80 | 88.90 | 201211.26 | 91132.91 |
|             | 2007 | 68.38 | 60.02 | 8.37 | 1971.28 | 66.15 | 3.94 | 85.27 | 34.71 | 34.71 | 1.37 | 2.57 | 46.06 | 6.19 | 3.35 | 68.40 | 89.20 | 149106.27 | 90953.75 |
|             | 2008 | 68.50 | 60.15 | 8.35 | 2020.15 | 78.08 | 4.05 | 85.24 | 57.17 | 32.93 | 1.33 | 2.71 | 45.79 | 6.34 | 3.28 | 69.10 | 89.50 | 152332.05 | 90795.88 |
|             | 2009 | 68.66 | 60.31 | 8.35 | 2010.80 | 81.01 | 4.41 | 84.55 | 54.86 | 35.11 | 1.55 | 2.86 | 45.52 | 6.50 | 3.21 | 69.80 | 89.80 | 223801.40 | 90661.52 |
|             | 2010 | 68.87 | 60.51 | 8.36 | 2129.50 | 93.83 | 4.37 | 84.47 | 54.08 | 35.98 | 1.57 | 2.80 | 45.26 | 6.68 | 3.16 | 70.50 | 90.10 | 159940.45 | 90573.56 |

|        |       |       |       |         |          |        |       |        |       |       |      |       |       |       |       |       |           |           |          |
|--------|-------|-------|-------|---------|----------|--------|-------|--------|-------|-------|------|-------|-------|-------|-------|-------|-----------|-----------|----------|
| 2011   | 69.01 | 60.65 | 8.36  | 2171.49 | 101.75   | 4.29   | 83.02 | 57.74  | 30.45 | 1.31  | 2.98 | 45.02 | 6.77  | 3.11  | 71.10 | 90.50 | 163797.79 | 90558.17  |          |
| 2012   | 69.17 | 60.81 | 8.37  | 2278.64 | 116.19   | 4.46   | 83.00 | 57.19  | 31.09 | 1.39  | 3.07 | 44.81 | 6.87  | 3.07  | 71.80 | 90.80 | 167297.55 | 90537.54  |          |
| 2013   | 69.24 | 60.88 | 8.36  | 2399.61 | 127.09   | 4.56   | 82.61 | 56.34  | 31.80 | 1.45  | 3.11 | 44.63 | 6.99  | 3.03  | 72.50 | 91.10 | -         | 90515.20  |          |
| 2014   | 69.67 | 61.25 | 8.42  | 2505.82 | 135.20   | 4.71   | 81.69 | 53.69  | 34.28 | 1.61  | 3.10 | 44.49 | 7.11  | 2.99  | 73.20 | 91.50 | -         | 90486.81  |          |
| 2015   | 69.92 | 61.47 | 8.45  | 2615.66 | -        | -      | -     | -      | -     | -     | -    | 44.37 | 7.23  | 2.96  | 73.90 | 91.80 | -         | 90467.54  |          |
| 2016   | 70.10 | 61.64 | 8.46  | 2753.35 | -        | -      | -     | -      | -     | -     | -    | 44.29 | 7.40  | -     | -     | -     | -         | 90447.45  |          |
| 2017   | 69.73 | 60.99 | 8.74  | -       | -        | -      | -     | -      | -     | -     | -    | -     | -     | -     | -     | -     | -         | -         |          |
| Poland | 1995  | 71.82 | 62.76 | 9.06    | 6539.05  | 197.38 | 5.36  | 100.00 | 27.11 | 72.89 | 3.91 | 1.45  | 61.49 | 16.59 | 1.62  | 95.00 | 458557.08 | 91796.45  |          |
|        | 1996  | 72.28 | 63.12 | 9.15    | 6929.82  | 238.48 | 5.76  | 100.00 | 26.61 | 73.39 | 4.22 | 1.53  | 61.54 | 16.87 | 1.59  | 87.00 | 95.20     | 435648.57 | 91848.19 |
|        | 1997  | 72.60 | 63.40 | 9.20    | 7372.62  | 227.99 | 5.54  | 100.00 | 28.04 | 71.96 | 3.98 | 1.55  | 61.58 | 17.10 | 1.51  | 87.00 | 95.40     | 433538.61 | 91905.79 |
|        | 1998  | 72.98 | 63.70 | 9.28    | 7710.09  | 264.14 | 5.86  | 100.00 | 34.62 | 65.38 | 3.83 | 2.03  | 61.63 | 17.29 | 1.44  | 87.00 | 95.60     | 388905.68 | 91979.68 |
|        | 1999  | 73.11 | 63.82 | 9.30    | 8068.67  | 248.86 | 5.67  | 100.00 | 28.87 | 71.13 | 4.03 | 1.64  | 61.67 | 17.44 | 1.38  | 87.00 | 95.80     | 380841.87 | 92044.79 |
|        | 2000  | 73.77 | 64.38 | 9.39    | 8525.14  | 247.14 | 5.50  | 100.00 | 29.97 | 70.03 | 3.85 | 1.65  | 61.72 | 17.58 | 1.37  | 87.00 | 95.90     | 392642.04 | 92106.61 |
|        | 2001  | 74.25 | 64.69 | 9.56    | 8633.92  | 291.66 | 5.86  | 100.00 | 28.10 | 71.90 | 4.21 | 1.65  | 61.76 | 17.86 | 1.31  | 87.80 | 96.10     | 385653.89 | 92162.89 |
|        | 2002  | 74.63 | 64.98 | 9.65    | 8814.27  | 328.38 | 6.32  | 88.21  | 25.44 | 71.16 | 4.50 | 1.82  | 61.79 | 18.14 | 1.25  | 88.50 | 96.30     | 375643.18 | 92228.87 |
|        | 2003  | 74.92 | 65.19 | 9.72    | 9134.44  | 354.11 | 6.22  | 87.96  | 26.43 | 69.91 | 4.35 | 1.87  | 61.68 | 18.38 | 1.22  | 89.20 | 96.50     | 387619.14 | 92289.03 |
|        | 2004  | 75.05 | 65.28 | 9.77    | 9609.17  | 410.62 | 6.19  | 89.61  | 28.11 | 68.58 | 4.24 | 1.94  | 61.56 | 18.54 | 1.23  | 89.90 | 96.60     | 411840.44 | 92342.18 |
|        | 2005  | 75.18 | 65.45 | 9.73    | 9949.25  | 494.70 | 6.20  | 85.35  | 26.12 | 69.30 | 4.30 | 1.90  | 61.45 | 18.60 | 1.24  | 90.60 | 96.80     | 411811.67 | 92386.78 |
|        | 2006  | 75.29 | 65.55 | 9.74    | 10570.77 | 555.12 | 6.17  | 85.36  | 25.59 | 69.90 | 4.31 | 1.85  | 61.34 | 18.66 | 1.27  | 91.30 | 97.00     | 423290.67 | 92397.50 |
|        | 2007  | 75.38 | 65.50 | 9.88    | 11320.55 | 706.20 | 6.28  | 83.25  | 70.39 | 70.39 | 4.42 | 1.86  | 61.23 | 18.63 | 1.31  | 92.10 | 97.10     | 421174.65 | 92403.56 |
|        | 2008  | 75.60 | 65.66 | 9.95    | 11800.03 | 956.52 | 6.88  | 80.96  | 22.80 | 71.77 | 4.94 | 1.94  | 61.12 | 18.58 | 1.39  | 92.80 | 97.30     | 420981.53 | 92396.10 |
|        | 2009  | 75.86 | 65.84 | 10.02   | 12124.61 | 815.01 | 7.12  | 80.57  | 22.70 | 71.58 | 5.10 | 2.01  | 61.00 | 18.65 | 1.40  | 93.50 | 97.50     | 405421.16 | 92401.94 |
|        | 2010  | 76.31 | 66.27 | 10.04   | 12597.86 | 867.75 | 6.88  | 78.25  | 22.11 | 71.22 | 4.90 | 1.95  | 60.89 | 18.89 | 1.41  | 94.30 | 97.60     | 426485.87 | 92445.44 |
|        | 2011  | 76.57 | 66.37 | 10.20   | 13222.81 | 931.05 | 6.70  | 76.20  | 22.28 | 70.28 | 4.71 | 1.96  | 60.78 | 19.36 | 1.33  | 95.00 | 97.80     | 422791.47 | 92436.30 |
|        | 2012  | 76.71 | 66.51 | 10.21   | 13435.46 | 869.70 | 6.62  | 75.00  | 22.74 | 69.17 | 4.58 | 2.01  | 60.69 | 19.98 | 1.33  | 95.70 | 98.00     | 414606.89 | 92460.87 |
|        | 2013  | 77.05 | 66.77 | 10.28   | 13630.69 | 881.77 | 6.40  | 80.65  | 23.55 | 70.80 | 4.53 | 1.87  | 60.62 | 20.73 | 1.29  | 96.50 | 98.20     | -         | 92466.08 |
|        | 2014  | 77.57 | 67.17 | 10.40   | 14088.75 | 910.28 | 6.35  | 80.85  | 23.46 | 70.98 | 4.51 | 1.84  | 60.57 | 21.57 | 1.32  | 97.20 | 98.30     | -         | 92470.50 |
|        | 2015  | 77.75 | 67.32 | 10.43   | 14640.15 | -      | -     | -      | -     | -     | -    | -     | 60.54 | 22.46 | 1.32  | 97.20 | 98.30     | -         | 92492.93 |
|        | 2016  | 77.93 | 67.60 | 10.33   | 15074.73 | -      | -     | -      | -     | -     | -    | -     | 60.53 | 23.46 | -     | -     | -         | -         | 92526.53 |

|             |      |       |       |       |          |         |       |       |       |       |      |      |       |       |      |       |        |           |          |
|-------------|------|-------|-------|-------|----------|---------|-------|-------|-------|-------|------|------|-------|-------|------|-------|--------|-----------|----------|
|             | 2017 | 77.99 | 66.81 | 11.18 | -        | -       | -     | -     | -     | -     | -    | -    | -     | -     | -    | -     | -      | -         | -        |
| Portugal    | 1995 | 75.31 | 65.76 | 9.55  | 18080.55 | 875.76  | 7.42  | 63.99 | 23.92 | 62.62 | 4.65 | 2.77 | 51.11 | 22.36 | 1.41 | 94.50 | 97.10  | 69204.41  | 91283.68 |
|             | 1996 | 75.44 | 65.89 | 9.55  | 18642.54 | 940.32  | 7.70  | 67.16 | 23.33 | 65.25 | 5.02 | 2.68 | 51.77 | 22.68 | 1.44 | 94.90 | 97.20  | 67633.10  | 91318.35 |
|             | 1997 | 75.79 | 66.20 | 9.59  | 19380.98 | 892.43  | 7.69  | 66.67 | 22.87 | 65.69 | 5.05 | 2.64 | 52.43 | 23.01 | 1.47 | 95.20 | 97.40  | 70751.83  | 91319.68 |
|             | 1998 | 76.06 | 66.44 | 9.61  | 20207.28 | 933.01  | 7.63  | 69.82 | 22.96 | 67.11 | 5.12 | 2.51 | 53.09 | 23.37 | 1.47 | 95.50 | 97.60  | 83126.73  | 91315.70 |
|             | 1999 | 76.29 | 66.66 | 9.63  | 20874.58 | 984.93  | 7.87  | 73.02 | 23.68 | 67.56 | 5.32 | 2.55 | 53.74 | 23.73 | 1.50 | 95.80 | 97.80  | 84722.77  | 91297.75 |
|             | 2000 | 76.70 | 67.00 | 9.69  | 21513.46 | 1055.67 | 9.14  | 70.03 | 22.58 | 67.75 | 6.19 | 2.95 | 54.40 | 24.11 | 1.55 | 96.20 | 98.00  | 88594.19  | 91306.80 |
|             | 2001 | 77.04 | 67.26 | 9.78  | 21777.41 | 1071.10 | 9.10  | 70.91 | 22.36 | 68.47 | 6.23 | 2.87 | 55.04 | 24.44 | 1.45 | 96.50 | 98.10  | 85398.97  | 91381.85 |
|             | 2002 | 77.34 | 67.52 | 9.82  | 21824.98 | 1182.29 | 9.15  | 71.01 | 20.88 | 70.59 | 6.46 | 2.69 | 55.67 | 24.76 | 1.46 | 96.80 | 98.30  | 88319.25  | 91459.58 |
|             | 2003 | 77.64 | 67.77 | 9.87  | 21540.07 | 1506.96 | 9.54  | 69.06 | 21.55 | 68.80 | 6.56 | 2.98 | 56.29 | 25.07 | 1.44 | 97.10 | 98.50  | 89900.20  | 91548.67 |
|             | 2004 | 78.09 | 68.12 | 9.97  | 21877.91 | 1777.19 | 9.84  | 72.38 | 21.66 | 70.07 | 6.89 | 2.94 | 56.91 | 25.36 | 1.40 | 97.30 | 98.60  | 84930.56  | 91653.27 |
|             | 2005 | 78.37 | 68.38 | 9.99  | 22004.80 | 1875.70 | 9.98  | 73.55 | 22.02 | 70.06 | 6.99 | 2.99 | 57.52 | 25.63 | 1.41 | 97.60 | 98.80  | 101594.26 | 91748.63 |
|             | 2006 | 78.79 | 68.72 | 10.07 | 22306.28 | 1919.22 | 9.67  | 74.12 | 23.67 | 68.06 | 6.58 | 3.09 | 58.14 | 26.10 | 1.37 | 97.90 | 99.00  | 81336.95  | 91835.27 |
|             | 2007 | 79.07 | 68.91 | 10.16 | 22817.32 | 2193.50 | 9.62  | 74.64 | 67.64 | 67.64 | 6.51 | 3.11 | 58.75 | 26.56 | 1.35 | 98.20 | 99.10  | 79399.30  | 91923.86 |
|             | 2008 | 79.35 | 69.13 | 10.22 | 22829.85 | 2457.72 | 9.90  | 74.81 | 24.37 | 67.42 | 6.67 | 3.22 | 59.36 | 27.03 | 1.39 | 98.50 | 99.30  | 74433.77  | 92015.43 |
|             | 2009 | 79.63 | 69.34 | 10.29 | 22128.85 | 2403.96 | 10.42 | 74.38 | 23.26 | 68.73 | 7.16 | 3.26 | 59.96 | 27.56 | 1.34 | 98.70 | 99.50  | 75492.50  | 92109.80 |
|             | 2010 | 79.91 | 69.59 | 10.32 | 22538.65 | 2352.32 | 10.44 | 74.49 | 23.30 | 68.71 | 7.17 | 3.27 | 60.57 | 28.17 | 1.39 | 99.00 | 99.60  | 71681.47  | 92223.61 |
|             | 2011 | 80.21 | 69.80 | 10.40 | 22159.48 | 2332.35 | 10.07 | 75.22 | 25.16 | 66.55 | 6.70 | 3.37 | 61.17 | 28.82 | 1.35 | 99.20 | 99.80  | 71977.89  | 92306.17 |
|             | 2012 | 80.38 | 69.96 | 10.42 | 21353.23 | 1999.82 | 9.74  | 76.16 | 27.40 | 64.03 | 6.24 | 3.50 | 61.76 | 29.52 | 1.28 | 99.50 | 99.90  | 72524.22  | 92411.60 |
|             | 2013 | 80.61 | 70.15 | 10.46 | 21228.09 | 2059.46 | 9.55  | 75.89 | 26.38 | 65.24 | 6.23 | 3.32 | 62.34 | 30.26 | 1.21 | 99.60 | 100.00 | -         | 92526.88 |
|             | 2014 | 80.83 | 70.33 | 10.50 | 21533.49 | 2096.82 | 9.50  | 76.29 | 26.84 | 64.82 | 6.16 | 3.34 | 62.91 | 31.03 | 1.23 | 99.70 | 100.00 | -         | 92646.68 |
|             | 2015 | 80.90 | 70.40 | 10.50 | 22016.84 | -       | -     | -     | -     | -     | -    | -    | 63.47 | 31.82 | 1.23 | 99.70 | 100.00 | -         | 92761.64 |
|             | 2016 | 80.99 | 70.51 | 10.47 | 22428.11 | -       | -     | -     | -     | -     | -    | -    | 64.02 | 32.48 | -    | -     | -      | -         | 92869.03 |
|             | 2017 | 81.44 | 70.13 | 11.31 | -        | -       | -     | -     | -     | -     | -    | -    | -     | -     | -    | -     | -      | -         | -        |
| Puerto Rico | 1995 | 73.75 | 64.57 | 9.18  | 21966.86 | -       | -     | -     | -     | -     | -    | -    | 93.73 | 16.29 | 2.09 | 99.30 | 93.60  | 2888.35   | 91663.68 |
|             | 1996 | 74.05 | 64.81 | 9.24  | 22350.30 | -       | -     | -     | -     | -     | -    | -    | 93.88 | 16.45 | 1.94 | 99.30 | 93.60  | 2947.39   | 91694.00 |
|             | 1997 | 75.02 | 65.56 | 9.46  | 22842.31 | -       | -     | -     | -     | -     | -    | -    | 94.02 | 16.63 | 1.90 | 99.30 | 93.60  | 2996.52   | 91748.19 |
|             | 1998 | 75.60 | 66.00 | 9.60  | 24243.43 | -       | -     | -     | -     | -     | -    | -    | 94.16 | 16.84 | 1.90 | 99.30 | 93.60  | 2864.89   | 91804.23 |
|             | 1999 | 75.69 | 66.05 | 9.64  | 24620.79 | -       | -     | -     | -     | -     | -    | -    | 94.30 | 17.09 | 1.97 | 99.30 | 93.60  | 2912.55   | 91869.56 |

|      |       |       |       |          |   |   |   |   |   |   |   |   |       |       |      |       |       |         |          |
|------|-------|-------|-------|----------|---|---|---|---|---|---|---|---|-------|-------|------|-------|-------|---------|----------|
| 2000 | 76.06 | 66.32 | 9.74  | 24924.15 | - | - | - | - | - | - | - | - | 94.39 | 17.38 | 2.05 | 99.30 | 93.60 | 2963.27 | 91954.27 |
| 2001 | 76.26 | 66.48 | 9.78  | 27320.47 | - | - | - | - | - | - | - | - | 94.33 | 17.63 | 1.93 | 99.30 | 93.60 | 3010.80 | 91981.47 |
| 2002 | 76.60 | 66.74 | 9.86  | 27769.11 | - | - | - | - | - | - | - | - | 94.28 | 17.87 | 1.83 | 99.30 | -     | 3031.48 | 92031.46 |
| 2003 | 76.88 | 66.96 | 9.92  | 28082.79 | - | - | - | - | - | - | - | - | 94.22 | 18.10 | 1.76 | 99.30 | -     | 3095.29 | 92073.41 |
| 2004 | 76.92 | 66.99 | 9.94  | 28571.45 | - | - | - | - | - | - | - | - | 94.17 | 18.31 | 1.78 | 99.30 | -     | 3098.94 | 92135.25 |
| 2005 | 77.07 | 67.11 | 9.96  | 28775.39 | - | - | - | - | - | - | - | - | 94.11 | 18.52 | 1.77 | 99.30 | -     | 3118.67 | 92228.06 |
| 2006 | 77.33 | 67.33 | 10.01 | 28640.44 | - | - | - | - | - | - | - | - | 94.06 | 18.77 | 1.71 | 99.30 | -     | 3105.72 | 92277.07 |
| 2007 | 77.49 | 67.43 | 10.06 | 27850.56 | - | - | - | - | - | - | - | - | 94.00 | 18.98 | 1.65 | 99.30 | -     | 3064.31 | 92323.84 |
| 2008 | 77.66 | 67.57 | 10.09 | 27510.51 | - | - | - | - | - | - | - | - | 93.94 | 19.15 | 1.65 | 99.30 | -     | 3067.97 | 92374.30 |
| 2009 | 77.90 | 67.75 | 10.15 | 27007.86 | - | - | - | - | - | - | - | - | 93.88 | 19.33 | 1.65 | 99.30 | -     | 3119.07 | 92427.12 |
| 2010 | 77.98 | 67.86 | 10.12 | 26435.74 | - | - | - | - | - | - | - | - | 93.83 | 19.54 | 1.62 | 99.30 | -     | 3199.25 | 92485.78 |
| 2011 | 78.22 | 68.03 | 10.18 | 26237.68 | - | - | - | - | - | - | - | - | 93.77 | 19.96 | 1.60 | 99.30 | -     | 3247.52 | 92508.43 |
| 2012 | 78.31 | 68.14 | 10.16 | 25820.79 | - | - | - | - | - | - | - | - | 93.72 | 20.41 | 1.54 | 99.30 | -     | 3293.25 | 92533.96 |
| 2013 | 78.41 | 68.25 | 10.16 | 25967.59 | - | - | - | - | - | - | - | - | 93.68 | 20.87 | 1.47 | 99.30 | -     | -       | 92563.96 |
| 2014 | 78.37 | 68.25 | 10.12 | -        | - | - | - | - | - | - | - | - | 93.64 | 21.30 | 1.43 | 99.30 | -     | -       | 92604.45 |
| 2015 | 78.55 | 68.41 | 10.15 | -        | - | - | - | - | - | - | - | - | 93.60 | 21.70 | 1.43 | 99.30 | -     | -       | 92644.69 |
| 2016 | 78.77 | 68.62 | 10.15 | -        | - | - | - | - | - | - | - | - | 93.57 | 22.20 | -    | -     | -     | -       | 92693.99 |
| 2017 | 81.44 | 70.13 | 11.31 | -        | - | - | - | - | - | - | - | - | -     | -     | -    | -     | -     | -       | -        |

|       |      |       |       |       |          |         |      |        |       |       |      |      |       |      |      |       |       |          |          |
|-------|------|-------|-------|-------|----------|---------|------|--------|-------|-------|------|------|-------|------|------|-------|-------|----------|----------|
| Qatar | 1995 | 74.64 | 63.81 | 10.83 | -        | 601.71  | 3.70 | 92.68  | 34.63 | 62.64 | 2.32 | 1.38 | 95.00 | 1.95 | 3.59 | 99.90 | 98.70 | -        | 89445.98 |
|       | 1996 | 74.69 | 63.85 | 10.84 | -        | 653.45  | 3.69 | 91.14  | 29.57 | 67.56 | 2.49 | 1.20 | 95.36 | 2.02 | 3.53 | 99.90 | 98.70 | -        | 89524.07 |
|       | 1997 | 74.75 | 63.91 | 10.85 | -        | 672.57  | 3.14 | 90.24  | 28.61 | 68.29 | 2.15 | 1.00 | 95.66 | 2.09 | 3.47 | 99.80 | 98.80 | -        | 89664.98 |
|       | 1998 | 74.81 | 63.95 | 10.86 | -        | 635.70  | 3.40 | 89.41  | 29.93 | 66.52 | 2.26 | 1.14 | 95.89 | 2.16 | 3.41 | 99.60 | 98.90 | 38744.69 | 89815.08 |
|       | 1999 | 74.84 | 63.97 | 10.86 | -        | 630.87  | 2.90 | 88.37  | 29.00 | 67.19 | 1.95 | 0.95 | 96.11 | 2.24 | 3.33 | 99.50 | 99.00 | 43695.70 | 89974.63 |
|       | 2000 | 75.01 | 64.10 | 10.91 | 60858.19 | 651.80  | 2.18 | 100.00 | 27.70 | 72.30 | 1.57 | 0.60 | 96.31 | 2.32 | 3.24 | 99.40 | 99.10 | 44439.70 | 90116.90 |
|       | 2001 | 75.25 | 64.30 | 10.95 | 60707.12 | 730.57  | 2.56 | 100.00 | 24.82 | 75.18 | 1.92 | 0.63 | 96.51 | 2.16 | 3.12 | 99.30 | 99.20 | 45516.27 | 90149.94 |
|       | 2002 | 75.31 | 64.37 | 10.94 | 62167.56 | 827.74  | 2.71 | 100.00 | 24.92 | 75.08 | 2.04 | 0.68 | 96.69 | 2.01 | 3.00 | 99.20 | 99.40 | 46983.92 | 90151.62 |
|       | 2003 | 75.55 | 64.57 | 10.98 | 60460.42 | 1458.93 | 4.14 | 100.00 | 15.79 | 84.21 | 3.49 | 0.65 | 96.87 | 1.87 | 2.86 | 99.10 | 99.50 | 51782.17 | 90144.54 |
|       | 2004 | 75.98 | 64.92 | 11.06 | 65405.72 | 1563.70 | 3.61 | 100.00 | 15.81 | 84.19 | 3.04 | 0.57 | 97.11 | 1.73 | 2.71 | 98.90 | 99.60 | 58827.54 | 90177.39 |
|       | 2005 | 76.37 | 65.27 | 11.10 | 61688.81 | 1603.30 | 3.01 | 100.00 | 15.87 | 84.13 | 2.54 | 0.48 | 97.45 | 1.61 | 2.57 | 98.80 | 99.70 | 61388.82 | 90264.52 |

|      |       |       |       |          |         |      |        |       |       |      |      |       |      |      |       |        |           |          |
|------|-------|-------|-------|----------|---------|------|--------|-------|-------|------|------|-------|------|------|-------|--------|-----------|----------|
| 2006 | 76.78 | 65.62 | 11.16 | 66623.14 | 1591.21 | 2.58 | 100.00 | 15.92 | 84.08 | 2.17 | 0.41 | 97.75 | 1.47 | 2.43 | 98.70 | 99.80  | 68073.79  | 90281.99 |
| 2007 | 77.27 | 66.01 | 11.26 | 66761.62 | 1563.75 | 2.31 | 100.00 | 84.02 | 84.02 | 1.94 | 0.37 | 98.02 | 1.39 | 2.31 | 98.60 | 99.90  | 77135.76  | 90369.29 |
| 2008 | 77.77 | 66.40 | 11.37 | 67262.45 | 1555.81 | 1.87 | 100.00 | 16.03 | 83.97 | 1.57 | 0.30 | 98.26 | 1.32 | 2.21 | 98.50 | 100.00 | 83149.37  | 90486.63 |
| 2009 | 78.34 | 66.82 | 11.51 | 65769.01 | 1618.84 | 2.63 | 73.31  | 15.82 | 78.42 | 2.07 | 0.57 | 98.47 | 1.27 | 2.13 | 98.40 | 100.00 | 86227.81  | 90638.35 |
| 2010 | 79.04 | 67.35 | 11.69 | 70306.23 | 1483.09 | 2.09 | 71.01  | 16.01 | 77.45 | 1.62 | 0.47 | 98.66 | 1.22 | 2.07 | 98.30 | 100.00 | 98391.53  | 90803.26 |
| 2011 | 79.55 | 67.74 | 11.81 | 72670.96 | 1716.89 | 1.93 | 63.46  | 13.86 | 78.17 | 1.51 | 0.42 | 98.81 | 1.20 | 2.03 | 98.10 | 100.00 | 100891.32 | 90679.70 |
| 2012 | 79.82 | 67.97 | 11.84 | 70396.82 | 2031.81 | 2.16 | 57.65  | 8.68  | 84.94 | 1.83 | 0.32 | 98.95 | 1.20 | 2.00 | 98.00 | 100.00 | 103155.12 | 90595.89 |
| 2013 | 80.03 | 68.15 | 11.87 | 68899.49 | 2067.51 | 2.15 | 48.15  | 6.53  | 86.43 | 1.85 | 0.29 | 99.06 | 1.20 | 1.97 | 98.00 | 100.00 | -         | 90541.17 |
| 2014 | 80.01 | 68.16 | 11.84 | 67901.22 | 2106.36 | 2.19 | 48.15  | 6.86  | 85.75 | 1.88 | 0.31 | 99.16 | 1.23 | 1.95 | 98.00 | 100.00 | -         | 90514.04 |
| 2015 | 79.95 | 68.16 | 11.79 | 67277.24 | -       | -    | -      | -     | -     | -    | -    | 99.24 | 1.28 | 1.93 | 98.00 | 100.00 | -         | 90512.89 |
| 2016 | 79.87 | 68.15 | 11.71 | 66410.76 | -       | -    | -      | -     | -     | -    | -    | 99.32 | 1.40 | -    | -     | -      | -         | 90579.55 |
| 2017 | 80.21 | 68.35 | 11.85 | -        | -       | -    | -      | -     | -     | -    | -    | -     | -    | -    | -     | -      | -         | -        |

|             |      |       |       |      |         |       |      |       |       |       |      |      |       |      |      |       |       |          |          |
|-------------|------|-------|-------|------|---------|-------|------|-------|-------|-------|------|------|-------|------|------|-------|-------|----------|----------|
| Republic of | 1995 | 53.13 | 45.31 | 7.82 | 2418.43 | 24.60 | 3.16 | 98.41 | 40.04 | 59.31 | 1.88 | 1.29 | 56.41 | 6.84 | 5.14 | -     | -     | 57957.63 | 91427.38 |
| Congo       | 1996 | 51.08 | 43.69 | 7.39 | 2452.14 | 26.02 | 2.86 | 98.19 | 39.14 | 60.13 | 1.72 | 1.14 | 56.83 | 6.79 | 5.13 | -     | -     | 51566.39 | 91440.65 |
|             | 1997 | 52.44 | 44.78 | 7.66 | 2368.34 | 25.05 | 3.10 | 98.55 | 37.75 | 61.70 | 1.91 | 1.19 | 57.30 | 6.73 | 5.12 | 12.50 | 68.30 | 49792.18 | 91465.81 |
|             | 1998 | 52.61 | 44.93 | 7.68 | 2387.56 | 24.68 | 3.74 | 98.76 | 40.15 | 59.34 | 2.22 | 1.52 | 57.77 | 6.66 | 5.11 | 12.60 | 68.60 | 32353.10 | 91498.86 |
|             | 1999 | 53.04 | 45.29 | 7.75 | 2260.73 | 23.80 | 3.07 | 98.83 | 42.31 | 57.19 | 1.75 | 1.31 | 58.23 | 6.58 | 5.11 | 12.60 | 68.90 | 27868.58 | 91518.28 |
|             | 2000 | 53.35 | 45.55 | 7.80 | 2364.61 | 22.01 | 2.13 | 98.92 | 42.01 | 57.53 | 1.22 | 0.90 | 58.70 | 6.50 | 5.10 | 12.70 | 69.20 | 28435.40 | 91557.81 |
|             | 2001 | 53.58 | 45.80 | 7.78 | 2387.85 | 21.38 | 2.44 | 98.73 | 44.65 | 54.78 | 1.33 | 1.10 | 59.16 | 6.47 | 5.09 | 12.80 | 69.50 | 35332.08 | 91570.82 |
|             | 2002 | 53.74 | 45.96 | 7.78 | 2430.29 | 22.74 | 2.45 | 98.94 | 46.99 | 52.51 | 1.29 | 1.16 | 59.62 | 6.42 | 5.08 | 12.90 | 70.10 | 24853.87 | 91587.05 |
|             | 2003 | 54.01 | 46.23 | 7.78 | 2383.36 | 27.39 | 2.61 | 99.20 | 49.79 | 49.81 | 1.30 | 1.31 | 60.08 | 6.37 | 5.07 | 13.10 | 70.60 | 34876.59 | 91611.79 |
|             | 2004 | 54.85 | 46.96 | 7.89 | 2395.82 | 34.81 | 2.56 | 98.76 | 45.82 | 53.60 | 1.37 | 1.19 | 60.53 | 6.30 | 5.05 | 13.20 | 71.20 | 34296.33 | 91636.12 |
|             | 2005 | 55.34 | 47.37 | 7.97 | 2503.31 | 42.08 | 2.42 | 98.78 | 40.26 | 59.24 | 1.43 | 0.99 | 60.99 | 6.24 | 5.04 | 13.40 | 71.70 | 38914.47 | 91656.07 |
|             | 2006 | 55.87 | 47.87 | 8.00 | 2573.51 | 50.89 | 2.37 | 98.75 | 36.57 | 62.97 | 1.49 | 0.88 | 61.44 | 6.21 | 5.03 | 13.60 | 72.20 | 37981.72 | 91649.75 |
|             | 2007 | 56.13 | 48.15 | 7.98 | 2447.51 | 57.33 | 2.54 | 98.48 | 60.91 | 60.91 | 1.55 | 0.99 | 61.89 | 6.18 | 5.01 | 13.70 | 72.80 | 34160.31 | 91661.45 |
|             | 2008 | 56.45 | 48.48 | 7.97 | 2496.50 | 64.52 | 2.09 | 97.96 | 39.77 | 59.40 | 1.24 | 0.85 | 62.34 | 6.14 | 5.00 | 13.90 | 73.30 | 31049.21 | 91665.15 |
|             | 2009 | 56.88 | 48.88 | 8.00 | 2595.75 | 55.01 | 2.27 | 96.87 | 48.08 | 50.37 | 1.14 | 1.12 | 62.79 | 6.11 | 4.97 | 14.10 | 73.80 | 34611.28 | 91674.70 |
|             | 2010 | 57.50 | 49.44 | 8.07 | 2737.34 | 67.71 | 2.29 | 94.22 | 37.24 | 60.47 | 1.39 | 0.91 | 63.23 | 6.06 | 4.95 | 14.30 | 74.30 | 35247.16 | 91695.87 |
|             | 2011 | 58.01 | 49.92 | 8.09 | 2751.91 | 96.35 | 2.79 | 96.02 | 27.97 | 70.87 | 1.98 | 0.81 | 63.67 | 6.11 | 4.92 | 14.40 | 74.80 | 35504.46 | 91633.23 |



|             |      |       |       |       |          |         |      |       |       |       |      |      |       |       |      |        |       |           |          |
|-------------|------|-------|-------|-------|----------|---------|------|-------|-------|-------|------|------|-------|-------|------|--------|-------|-----------|----------|
| Republic of | 1995 | 74.21 | 65.27 | 8.94  | 12055.23 | 452.96  | 3.67 | 85.05 | 53.13 | 37.53 | 1.38 | 2.29 | 78.24 | 8.42  | 1.63 | 100.00 | 90.60 | 453629.67 | 87366.13 |
|             | 1996 | 74.67 | 65.62 | 9.05  | 12847.77 | 509.24  | 3.88 | 84.81 | 50.52 | 40.43 | 1.57 | 2.31 | 78.66 | 8.67  | 1.57 | 100.00 | 91.20 | 487344.75 | 87516.53 |
|             | 1997 | 75.10 | 65.97 | 9.13  | 13481.63 | 469.23  | 3.87 | 83.43 | 47.59 | 42.96 | 1.66 | 2.21 | 78.91 | 8.94  | 1.52 | 100.00 | 91.80 | 513934.87 | 87692.59 |
|             | 1998 | 75.39 | 66.22 | 9.18  | 12652.35 | 320.70  | 3.97 | 81.48 | 42.51 | 47.83 | 1.90 | 2.07 | 79.15 | 9.24  | 1.45 | 100.00 | 92.30 | 450493.85 | 87860.91 |
|             | 1999 | 75.72 | 66.49 | 9.23  | 13983.41 | 437.41  | 4.20 | 82.53 | 42.54 | 48.45 | 2.04 | 2.17 | 79.38 | 9.58  | 1.41 | 100.00 | 92.90 | 489986.32 | 87996.70 |
|             | 2000 | 76.05 | 66.81 | 9.24  | 15104.52 | 504.90  | 4.23 | 80.60 | 41.13 | 48.97 | 2.07 | 2.16 | 79.62 | 9.95  | 1.47 | 100.00 | 93.40 | 512819.94 | 88135.01 |
|             | 2001 | 76.37 | 67.00 | 9.38  | 15667.38 | 535.74  | 4.76 | 80.19 | 35.90 | 55.23 | 2.63 | 2.13 | 79.94 | 10.37 | 1.30 | 100.00 | 94.00 | 522374.16 | 88309.77 |
|             | 2002 | 76.79 | 67.31 | 9.48  | 16734.85 | 589.89  | 4.61 | 80.44 | 36.91 | 54.12 | 2.50 | 2.12 | 80.30 | 10.84 | 1.17 | 100.00 | 94.50 | 534839.28 | 88516.24 |
|             | 2003 | 77.32 | 67.71 | 9.61  | 17136.66 | 700.36  | 4.93 | 80.09 | 38.33 | 52.14 | 2.57 | 2.36 | 80.65 | 11.33 | 1.18 | 100.00 | 95.10 | 546211.11 | 88730.98 |
|             | 2004 | 77.91 | 68.16 | 9.75  | 17905.23 | 789.63  | 4.96 | 80.77 | 38.35 | 52.52 | 2.60 | 2.35 | 81.00 | 11.80 | 1.15 | 100.00 | 95.60 | 562450.96 | 88956.84 |
|             | 2005 | 78.44 | 68.63 | 9.81  | 18568.36 | 994.17  | 5.33 | 80.50 | 37.92 | 52.89 | 2.82 | 2.51 | 81.35 | 12.26 | 1.08 | 100.00 | 96.10 | 561372.54 | 89193.95 |
|             | 2006 | 78.90 | 68.99 | 9.90  | 19427.19 | 1204.22 | 5.76 | 80.47 | 36.50 | 54.64 | 3.15 | 2.61 | 81.53 | 12.73 | 1.12 | 100.00 | 96.60 | 565697.20 | 89306.37 |
|             | 2007 | 79.30 | 69.23 | 10.07 | 20385.32 | 1383.03 | 5.99 | 79.40 | 54.78 | 54.78 | 3.28 | 2.71 | 81.63 | 13.19 | 1.25 | 100.00 | 97.10 | 575558.38 | 89393.71 |
|             | 2008 | 79.66 | 69.51 | 10.15 | 20803.50 | 1260.85 | 6.16 | 78.71 | 35.71 | 54.63 | 3.36 | 2.79 | 81.73 | 13.63 | 1.19 | 100.00 | 97.60 | 594982.20 | 89521.13 |
|             | 2009 | 79.99 | 69.76 | 10.23 | 20843.13 | 1220.65 | 6.66 | 78.92 | 34.39 | 56.43 | 3.76 | 2.90 | 81.84 | 14.11 | 1.15 | 100.00 | 97.60 | 594493.20 | 89682.83 |
|             | 2010 | 80.25 | 70.03 | 10.21 | 22086.95 | 1505.02 | 6.79 | 78.42 | 33.92 | 56.74 | 3.86 | 2.94 | 81.94 | 14.63 | 1.23 | 100.00 | 97.60 | 628838.72 | 89838.46 |
|             | 2011 | 80.53 | 70.20 | 10.33 | 22724.71 | 1650.46 | 6.83 | 78.06 | 34.40 | 55.93 | 3.82 | 3.01 | 82.04 | 15.15 | 1.24 | 100.00 | 97.60 | 650085.53 | 89937.35 |
|             | 2012 | 80.74 | 70.39 | 10.35 | 23123.76 | 1714.86 | 7.01 | 77.33 | 34.85 | 54.93 | 3.85 | 3.16 | 82.14 | 15.73 | 1.30 | 100.00 | 97.60 | 668989.65 | 90074.91 |
|             | 2013 | 80.96 | 70.57 | 10.39 | 23685.41 | 1870.13 | 7.20 | 77.09 | 35.21 | 54.33 | 3.91 | 3.29 | 82.25 | 16.36 | 1.19 | 100.00 | -     | -         | 90212.30 |
|             | 2014 | 80.99 | 70.63 | 10.36 | 24323.57 | 2060.25 | 7.37 | 78.54 | 36.09 | 54.05 | 3.99 | 3.39 | 82.36 | 17.02 | 1.21 | 100.00 | -     | -         | 90351.86 |
|             | 2015 | 81.02 | 70.68 | 10.34 | 24870.77 | -       | -    | -     | -     | -     | -    | -    | 82.47 | 17.73 | 1.24 | 100.00 | -     | -         | 90490.89 |
|             | 2016 | 81.00 | 70.76 | 10.24 | 25458.89 | -       | -    | -     | -     | -     | -    | -    | 82.59 | 18.43 | -    | -      | -     | -         | 90637.28 |
|             | 2017 | 82.60 | 71.68 | 10.92 | -        | -       | -    | -     | -     | -     | -    | -    | -     | -     | -    | -      | -     | -         | -        |
| Republic of | 1995 | 60.46 | 50.38 | 10.09 | 1032.52  | 39.66   | 4.20 | 95.62 | 64.72 | 32.32 | 1.36 | 2.85 | 23.76 | 6.53  | 7.53 | 31.60  | 63.30 | 17884.47  | 89232.81 |
| Yemen       | 1996 | 60.80 | 50.69 | 10.11 | 1041.70  | 23.33   | 4.11 | 95.30 | 57.21 | 39.97 | 1.64 | 2.47 | 24.25 | 6.41  | 7.25 | 33.20  | 62.60 | 18386.30  | 89187.58 |
|             | 1997 | 61.26 | 51.09 | 10.17 | 1061.49  | 20.31   | 4.26 | 95.19 | 52.77 | 44.56 | 1.90 | 2.36 | 24.74 | 6.27  | 6.99 | 34.70  | 61.90 | 19676.02  | 89175.99 |
|             | 1998 | 61.67 | 51.45 | 10.22 | 1092.80  | 21.44   | 4.98 | 93.16 | 49.66 | 46.70 | 2.32 | 2.65 | 25.24 | 6.13  | 6.74 | 36.30  | 61.30 | 20869.79  | 89166.70 |
|             | 1999 | 62.15 | 51.86 | 10.29 | 1102.61  | 21.51   | 4.28 | 94.94 | 47.77 | 49.69 | 2.13 | 2.15 | 25.75 | 5.97  | 6.51 | 37.80  | 60.60 | 22895.70  | 89173.72 |
|             | 2000 | 62.61 | 52.26 | 10.35 | 1138.25  | 25.27   | 4.14 | 94.57 | 43.49 | 54.01 | 2.24 | 1.90 | 26.27 | 5.82  | 6.31 | 39.40  | 59.90 | 24225.18  | 89176.10 |

|      |       |       |       |         |       |      |       |       |       |      |      |       |      |      |       |       |          |          |
|------|-------|-------|-------|---------|-------|------|-------|-------|-------|------|------|-------|------|------|-------|-------|----------|----------|
| 2001 | 63.07 | 52.66 | 10.40 | 1148.43 | 26.62 | 4.34 | 94.79 | 44.63 | 52.92 | 2.29 | 2.04 | 26.79 | 5.72 | 6.13 | 41.00 | 59.20 | 25210.42 | 89175.88 |
| 2002 | 63.53 | 53.08 | 10.45 | 1160.24 | 27.44 | 4.22 | 94.84 | 46.68 | 50.78 | 2.14 | 2.08 | 27.32 | 5.61 | 5.95 | 42.50 | 58.50 | 26580.10 | 89181.60 |
| 2003 | 63.99 | 53.48 | 10.51 | 1170.14 | 35.01 | 5.00 | 96.18 | 54.25 | 43.60 | 2.18 | 2.82 | 27.85 | 5.49 | 5.78 | 44.10 | 57.90 | 28983.22 | 89207.25 |
| 2004 | 64.50 | 53.93 | 10.57 | 1182.90 | 38.38 | 4.90 | 97.28 | 60.46 | 37.85 | 1.85 | 3.04 | 28.39 | 5.38 | 5.60 | 45.70 | 57.20 | 29514.28 | 89242.34 |
| 2005 | 64.96 | 54.35 | 10.61 | 1214.70 | 42.54 | 4.58 | 97.95 | 64.78 | 33.86 | 1.55 | 3.03 | 28.94 | 5.26 | 5.43 | 47.30 | 56.50 | 32666.19 | 89282.97 |
| 2006 | 65.51 | 54.80 | 10.71 | 1219.01 | 52.10 | 4.82 | 92.47 | 63.26 | 31.59 | 1.52 | 3.30 | 29.49 | 5.18 | 5.25 | 48.80 | 55.70 | 34959.45 | 89336.66 |
| 2007 | 65.83 | 55.04 | 10.79 | 1225.47 | 58.09 | 4.92 | 98.44 | 29.75 | 29.75 | 1.46 | 3.45 | 30.04 | 5.10 | 5.09 | 50.40 | 55.00 | 36225.63 | 89355.69 |
| 2008 | 66.39 | 55.48 | 10.90 | 1235.81 | 69.69 | 5.12 | 98.53 | 68.40 | 30.58 | 1.57 | 3.55 | 30.60 | 5.02 | 4.94 | 52.00 | 54.30 | 36800.23 | 89349.36 |
| 2009 | 67.02 | 55.99 | 11.03 | 1249.03 | 65.91 | 5.32 | 98.58 | 73.79 | 25.14 | 1.34 | 3.98 | 31.17 | 4.96 | 4.80 | 52.30 | 54.50 | 37027.20 | 89316.41 |
| 2010 | 67.49 | 56.39 | 11.09 | 1309.23 | 67.75 | 5.17 | 98.62 | 73.84 | 25.12 | 1.30 | 3.87 | 31.73 | 4.92 | 4.67 | 52.70 | 54.60 | 38865.29 | 89278.49 |
| 2011 | 67.66 | 56.55 | 11.11 | 1112.35 | 64.65 | 5.04 | 98.63 | 72.21 | 26.79 | 1.35 | 3.69 | 32.30 | 4.94 | 4.55 | 53.00 | 54.70 | 39949.08 | 89227.49 |
| 2012 | 67.88 | 56.76 | 11.12 | 1108.90 | 73.91 | 5.73 | 98.66 | 71.61 | 27.41 | 1.57 | 4.16 | 32.87 | 4.97 | 4.44 | 53.30 | 54.90 | 40924.63 | 89210.34 |
| 2013 | 68.33 | 57.15 | 11.18 | 1132.10 | 78.52 | 5.78 | 98.67 | 74.58 | 24.41 | 1.41 | 4.37 | 33.45 | 5.01 | 4.33 | -     | -     | -        | 89253.55 |
| 2014 | 68.42 | 57.26 | 11.16 | 1101.12 | 79.94 | 5.64 | 98.68 | 76.42 | 22.56 | 1.27 | 4.37 | 34.03 | 5.03 | 4.22 | -     | -     | -        | 89348.21 |
| 2015 | 67.15 | 56.29 | 10.85 | 772.03  | -     | -    | -     | -     | -     | -    | -    | 34.61 | 5.05 | 4.10 | -     | -     | -        | 89472.89 |
| 2016 | 66.68 | 56.00 | 10.68 | 679.67  | -     | -    | -     | -     | -     | -    | -    | 35.19 | 5.09 | -    | -     | -     | -        | 89597.65 |
| 2017 | 68.06 | 56.73 | 11.34 | -       | -     | -    | -     | -     | -     | -    | -    | -     | -    | -    | -     | -     | -        | -        |

|                |      |       |       |      |         |        |      |        |       |       |      |      |       |       |      |       |       |           |          |
|----------------|------|-------|-------|------|---------|--------|------|--------|-------|-------|------|------|-------|-------|------|-------|-------|-----------|----------|
| <b>Romania</b> | 1995 | 69.28 | 60.56 | 8.72 | 4911.07 | 53.29  | 3.22 | 100.00 | 25.46 | 74.54 | 2.40 | 0.82 | 53.77 | 17.95 | 1.33 | 72.30 | 79.80 | 177197.36 | 92821.78 |
|                | 1996 | 69.05 | 60.40 | 8.66 | 5115.83 | 52.66  | 3.21 | 100.00 | 26.78 | 73.22 | 2.35 | 0.86 | 53.62 | 18.44 | 1.30 | 72.60 | 80.90 | 181831.13 | 92826.65 |
|                | 1997 | 69.25 | 60.57 | 8.68 | 4883.49 | 66.33  | 4.17 | 100.00 | 20.62 | 79.38 | 3.31 | 0.86 | 53.46 | 18.88 | 1.32 | 72.90 | 82.00 | 167308.77 | 92826.55 |
|                | 1998 | 69.96 | 61.14 | 8.81 | 4791.46 | 69.67  | 3.75 | 100.00 | 24.42 | 75.58 | 2.84 | 0.92 | 53.31 | 19.29 | 1.32 | 73.20 | 83.10 | 147443.81 | 92831.76 |
|                | 1999 | 70.78 | 61.81 | 8.98 | 4779.72 | 67.53  | 4.20 | 100.00 | 20.34 | 79.66 | 3.34 | 0.85 | 53.16 | 19.68 | 1.30 | 73.50 | 84.20 | 129620.60 | 92852.48 |
|                | 2000 | 71.12 | 62.12 | 9.00 | 4900.54 | 72.61  | 4.33 | 100.00 | 18.80 | 81.20 | 3.51 | 0.81 | 53.00 | 20.06 | 1.31 | 73.80 | 85.30 | 132627.54 | 92887.08 |
|                | 2001 | 71.05 | 62.06 | 8.99 | 5247.29 | 79.16  | 4.36 | 100.00 | 18.88 | 81.12 | 3.53 | 0.82 | 52.85 | 20.59 | 1.27 | 74.10 | 86.50 | 137737.59 | 92926.67 |
|                | 2002 | 71.21 | 62.22 | 9.00 | 5621.29 | 96.66  | 4.57 | 100.00 | 17.81 | 82.19 | 3.76 | 0.81 | 52.78 | 21.11 | 1.27 | 74.40 | 87.60 | 135160.39 | 92955.47 |
|                | 2003 | 71.53 | 62.48 | 9.05 | 5974.77 | 146.70 | 5.30 | 97.43  | 14.81 | 84.80 | 4.49 | 0.81 | 52.91 | 21.57 | 1.30 | 74.80 | 88.80 | 141128.16 | 92982.70 |
|                | 2004 | 72.00 | 62.85 | 9.16 | 6511.17 | 192.79 | 5.43 | 96.81  | 24.13 | 74.60 | 4.05 | 1.35 | 53.04 | 21.91 | 1.33 | 75.20 | 90.00 | 139881.57 | 92993.97 |
|                | 2005 | 72.36 | 63.20 | 9.16 | 6824.82 | 255.29 | 5.47 | 96.41  | 18.46 | 80.43 | 4.40 | 1.05 | 53.17 | 22.10 | 1.40 | 75.60 | 91.10 | 139578.17 | 93011.69 |
|                | 2006 | 72.79 | 63.54 | 9.25 | 7418.42 | 294.14 | 5.06 | 98.16  | 19.79 | 79.66 | 4.03 | 1.02 | 53.31 | 22.37 | 1.42 | 75.90 | 92.30 | 144382.55 | 93021.92 |

|      |       |       |       |          |        |      |       |       |       |      |      |       |       |      |       |        |           |          |
|------|-------|-------|-------|----------|--------|------|-------|-------|-------|------|------|-------|-------|------|-------|--------|-----------|----------|
| 2007 | 73.18 | 63.78 | 9.40  | 8045.58  | 423.85 | 5.21 | 97.40 | 82.11 | 82.11 | 4.28 | 0.92 | 53.44 | 22.51 | 1.45 | 76.30 | 93.50  | 141043.06 | 93035.00 |
| 2008 | 73.10 | 63.72 | 9.38  | 8872.78  | 541.47 | 5.33 | 98.09 | 17.62 | 81.99 | 4.37 | 0.96 | 53.57 | 22.58 | 1.60 | 76.70 | 94.60  | 136834.94 | 93038.14 |
| 2009 | 73.26 | 63.84 | 9.42  | 8314.74  | 456.81 | 5.56 | 97.86 | 20.52 | 79.00 | 4.39 | 1.17 | 53.70 | 22.69 | 1.66 | 77.10 | 95.80  | 119648.21 | 93056.47 |
| 2010 | 73.59 | 64.18 | 9.41  | 8297.48  | 482.95 | 5.83 | 98.16 | 19.21 | 80.35 | 4.69 | 1.14 | 53.83 | 22.89 | 1.59 | 77.50 | 96.90  | 117930.70 | 93123.06 |
| 2011 | 74.43 | 64.72 | 9.71  | 8426.47  | 507.68 | 5.53 | 97.79 | 20.32 | 79.22 | 4.38 | 1.15 | 53.96 | 23.19 | 1.47 | 77.90 | 98.00  | 126194.42 | 93171.91 |
| 2012 | 74.54 | 64.83 | 9.72  | 8518.32  | 467.64 | 5.48 | 96.99 | 19.14 | 80.27 | 4.40 | 1.08 | 54.09 | 23.56 | 1.52 | 78.30 | 99.00  | 121762.23 | 93207.23 |
| 2013 | 74.74 | 64.99 | 9.75  | 8851.96  | 535.48 | 5.60 | 97.08 | 18.66 | 80.78 | 4.52 | 1.08 | 54.24 | 24.02 | 1.41 | 78.60 | 100.00 | -         | 93226.76 |
| 2014 | 74.75 | 65.02 | 9.73  | 9158.52  | 556.81 | 5.57 | 96.30 | 18.87 | 80.40 | 4.47 | 1.09 | 54.39 | 24.55 | 1.52 | 79.00 | 100.00 | -         | 93228.62 |
| 2015 | 75.09 | 65.28 | 9.81  | 9567.39  | -      | -    | -     | -     | -     | -    | -    | 54.56 | 25.15 | 1.52 | 79.10 | 100.00 | -         | 93236.02 |
| 2016 | 75.23 | 65.54 | 9.69  | 10062.43 | -      | -    | -     | -     | -     | -    | -    | 54.75 | 25.89 | -    | -     | -      | -         | 93255.43 |
| 2017 | 75.18 | 64.71 | 10.47 | -        | -      | -    | -     | -     | -     | -    | -    | -     | -     | -    | -     | -      | -         | -        |

|        |      |       |       |      |        |       |       |       |       |       |      |      |       |      |      |       |       |         |          |
|--------|------|-------|-------|------|--------|-------|-------|-------|-------|-------|------|------|-------|------|------|-------|-------|---------|----------|
| Rwanda | 1995 | 44.58 | 39.16 | 5.42 | 280.50 | 9.34  | 4.27  | 41.25 | 25.40 | 38.43 | 1.64 | 2.63 | 9.84  | 3.95 | 6.17 | 40.20 | 62.40 | 3231.68 | 86862.14 |
|        | 1996 | 45.94 | 40.38 | 5.56 | 306.58 | 10.05 | 4.44  | 41.20 | 23.77 | 42.29 | 1.88 | 2.56 | 11.37 | 4.37 | 6.05 | 41.60 | 63.40 | 3420.40 | 87017.52 |
|        | 1997 | 45.31 | 39.88 | 5.42 | 327.24 | 12.57 | 4.42  | 41.20 | 23.91 | 41.96 | 1.85 | 2.56 | 12.47 | 4.82 | 5.94 | 43.00 | 64.20 | 3682.84 | 87176.88 |
|        | 1998 | 46.63 | 41.01 | 5.62 | 329.12 | 14.34 | 5.08  | 41.16 | 20.42 | 50.38 | 2.56 | 2.52 | 13.24 | 5.32 | 5.84 | 44.20 | 64.90 | 5454.04 | 87307.40 |
|        | 1999 | 48.00 | 42.17 | 5.84 | 319.06 | 10.96 | 4.57  | 40.97 | 22.31 | 45.56 | 2.08 | 2.49 | 14.06 | 5.78 | 5.74 | 45.40 | 65.60 | 4837.27 | 87406.99 |
|        | 2000 | 49.44 | 43.33 | 6.11 | 327.10 | 9.13  | 4.22  | 40.73 | 24.78 | 39.17 | 1.65 | 2.57 | 14.93 | 6.15 | 5.64 | 46.60 | 66.30 | 4900.33 | 87453.37 |
|        | 2001 | 50.66 | 44.41 | 6.25 | 341.99 | 8.81  | 4.38  | 45.98 | 23.53 | 48.83 | 2.14 | 2.24 | 15.83 | 5.95 | 5.54 | 47.80 | 67.00 | 3924.02 | 87403.72 |
|        | 2002 | 52.62 | 46.10 | 6.52 | 377.71 | 8.20  | 4.18  | 51.72 | 24.69 | 52.27 | 2.18 | 1.99 | 16.78 | 5.65 | 5.45 | 48.90 | 67.70 | 4806.29 | 87320.57 |
|        | 2003 | 54.17 | 47.44 | 6.73 | 379.64 | 13.48 | 6.34  | 36.81 | 17.40 | 52.74 | 3.35 | 3.00 | 17.60 | 5.33 | 5.35 | 50.00 | 68.40 | 4793.81 | 87223.92 |
|        | 2004 | 55.95 | 48.97 | 6.98 | 401.41 | 14.78 | 6.24  | 40.90 | 22.06 | 46.05 | 2.88 | 3.37 | 18.43 | 5.06 | 5.24 | 51.10 | 69.10 | 5635.40 | 87137.44 |
|        | 2005 | 57.80 | 50.60 | 7.20 | 430.63 | 19.58 | 6.83  | 43.72 | 23.25 | 46.82 | 3.20 | 3.63 | 19.28 | 4.86 | 5.14 | 52.20 | 69.80 | 4963.96 | 87085.07 |
|        | 2006 | 59.60 | 52.23 | 7.36 | 459.41 | 33.75 | 10.02 | 44.32 | 22.28 | 49.72 | 4.98 | 5.04 | 20.17 | 4.79 | 5.02 | 53.30 | 70.40 | 5021.66 | 87037.24 |
|        | 2007 | 61.20 | 53.57 | 7.64 | 482.14 | 33.81 | 8.49  | 44.57 | 44.52 | 44.52 | 3.78 | 4.71 | 21.09 | 4.77 | 4.90 | 54.30 | 71.10 | 4904.62 | 86996.00 |
|        | 2008 | 62.60 | 54.79 | 7.80 | 521.55 | 37.69 | 7.66  | 45.46 | 28.67 | 36.94 | 2.83 | 4.83 | 22.03 | 4.78 | 4.77 | 55.30 | 71.80 | 5183.74 | 86983.78 |
|        | 2009 | 63.43 | 55.53 | 7.90 | 539.38 | 38.14 | 7.20  | 45.73 | 30.48 | 33.35 | 2.40 | 4.80 | 22.99 | 4.79 | 4.64 | 56.30 | 72.40 | 5967.06 | 87013.22 |
|        | 2010 | 64.72 | 56.75 | 7.96 | 563.49 | 43.79 | 7.91  | 44.59 | 28.09 | 37.02 | 2.93 | 4.98 | 23.95 | 4.79 | 4.52 | 57.20 | 73.10 | 6547.47 | 87039.62 |
|        | 2011 | 65.48 | 57.34 | 8.14 | 591.82 | 46.79 | 7.71  | 45.47 | 28.89 | 36.46 | 2.81 | 4.90 | 24.92 | 4.82 | 4.39 | 58.20 | 73.70 | 6620.25 | 87009.96 |
|        | 2012 | 66.13 | 57.91 | 8.21 | 627.85 | 51.24 | 7.68  | 45.74 | 28.84 | 36.94 | 2.84 | 4.84 | 25.89 | 4.84 | 4.27 | 59.10 | 74.30 | 6689.95 | 87014.66 |

|             |      |       |       |      |         |        |      |        |       |       |      |      |       |       |      |       |       |        |          |
|-------------|------|-------|-------|------|---------|--------|------|--------|-------|-------|------|------|-------|-------|------|-------|-------|--------|----------|
|             | 2013 | 66.62 | 58.35 | 8.27 | 640.95  | 52.20  | 7.69 | 44.57  | 27.61 | 38.05 | 2.93 | 4.76 | 26.87 | 4.86  | 4.16 | 60.00 | 74.90 | -      | 87029.25 |
|             | 2014 | 67.06 | 58.73 | 8.32 | 672.75  | 52.48  | 7.53 | 45.44  | 28.13 | 38.10 | 2.87 | 4.66 | 27.84 | 4.91  | 4.06 | 60.80 | 75.50 | -      | 87053.08 |
|             | 2015 | 67.43 | 59.06 | 8.37 | 714.54  | -      | -    | -      | -     | -     | -    | -    | 28.81 | 4.98  | 3.97 | 61.60 | 76.10 | -      | 87084.28 |
|             | 2016 | 67.77 | 59.47 | 8.30 | 738.64  | -      | -    | -      | -     | -     | -    | -    | 29.78 | 5.10  | -    | -     | -     | -      | 87115.85 |
|             | 2017 | 68.46 | 59.65 | 8.81 | -       | -      | -    | -      | -     | -     | -    | -    | -     | -     | -    | -     | -     | -      | -        |
| Saint Lucia | 1995 | 73.14 | 63.78 | 9.36 | 6857.67 | 232.15 | 6.09 | 98.27  | 49.12 | 50.02 | 3.04 | 3.04 | 28.77 | 13.38 | 2.89 | 80.60 | 93.40 | 334.15 | 90646.74 |
|             | 1996 | 73.47 | 64.09 | 9.39 | 6963.56 | 268.64 | 7.07 | 98.48  | 49.13 | 50.11 | 3.54 | 3.53 | 28.57 | 13.23 | 2.77 | 81.10 | 93.50 | 347.70 | 90737.09 |
|             | 1997 | 73.79 | 64.37 | 9.42 | 6810.47 | 256.02 | 6.40 | 98.48  | 52.11 | 47.09 | 3.01 | 3.38 | 28.37 | 13.08 | 2.64 | 81.60 | 93.70 | 330.53 | 90844.89 |
|             | 1998 | 73.97 | 64.52 | 9.44 | 7145.33 | 220.79 | 5.14 | 97.58  | 38.91 | 60.12 | 3.09 | 2.05 | 28.17 | 12.93 | 2.50 | 82.10 | 93.90 | -      | 90950.88 |
|             | 1999 | 74.13 | 64.66 | 9.46 | 7242.27 | 247.23 | 5.54 | 97.95  | 43.35 | 55.74 | 3.09 | 2.45 | 27.97 | 12.77 | 2.35 | 82.60 | 94.10 | -      | 91050.36 |
|             | 2000 | 74.17 | 64.71 | 9.45 | 7144.88 | 275.06 | 5.53 | 98.00  | 47.03 | 52.01 | 2.88 | 2.65 | 27.77 | 12.58 | 2.20 | 83.10 | 94.20 | 404.94 | 91167.63 |
|             | 2001 | 74.07 | 64.66 | 9.41 | 6808.90 | 283.97 | 6.10 | 98.08  | 45.91 | 53.19 | 3.24 | 2.85 | 27.47 | 12.34 | 2.06 | 83.60 | 94.40 | 408.26 | 91273.42 |
|             | 2002 | 74.08 | 64.70 | 9.38 | 6774.62 | 292.94 | 6.33 | 98.11  | 47.43 | 51.66 | 3.27 | 3.06 | 26.33 | 12.08 | 1.93 | 84.10 | 94.50 | 412.31 | 91379.37 |
|             | 2003 | 73.92 | 64.60 | 9.32 | 7039.88 | 304.04 | 6.10 | 98.11  | 50.79 | 48.23 | 2.94 | 3.16 | 25.22 | 11.82 | 1.83 | 84.60 | 94.60 | 427.33 | 91501.58 |
|             | 2004 | 73.90 | 64.60 | 9.29 | 7518.65 | 335.74 | 6.20 | 98.42  | 51.62 | 47.55 | 2.95 | 3.25 | 24.13 | 11.55 | 1.74 | 85.10 | 94.80 | 470.33 | 91625.78 |
|             | 2005 | 74.13 | 64.80 | 9.33 | 7415.02 | 353.27 | 6.25 | 98.47  | 52.83 | 46.35 | 2.90 | 3.35 | 23.09 | 11.28 | 1.68 | 85.70 | 94.90 | 473.07 | 91749.58 |
|             | 2006 | 74.42 | 65.05 | 9.38 | 7840.60 | 402.78 | 6.37 | 98.23  | 50.21 | 48.88 | 3.11 | 3.26 | 22.07 | 11.45 | 1.63 | 86.20 | 95.10 | 493.09 | 91896.52 |
|             | 2007 | 74.76 | 65.29 | 9.47 | 7906.70 | 457.89 | 6.81 | 98.30  | 43.74 | 43.74 | 2.98 | 3.83 | 21.08 | 11.68 | 1.60 | 86.80 | 95.20 | 512.25 | 92044.78 |
|             | 2008 | 75.13 | 65.58 | 9.56 | 8221.77 | 504.18 | 7.43 | 98.42  | 51.11 | 48.07 | 3.57 | 3.86 | 20.13 | 11.97 | 1.57 | 87.30 | 95.30 | 533.67 | 92193.59 |
|             | 2009 | 75.54 | 65.88 | 9.66 | 8070.11 | 545.27 | 8.12 | 98.62  | 45.15 | 54.22 | 4.40 | 3.72 | 19.21 | 12.33 | 1.56 | 87.90 | 95.50 | 534.36 | 92343.37 |
|             | 2010 | 75.41 | 65.76 | 9.65 | 8007.70 | 567.88 | 8.10 | 98.62  | 49.48 | 49.83 | 4.03 | 4.06 | 18.45 | 12.79 | 1.54 | 88.50 | 95.60 | 563.92 | 92488.50 |
|             | 2011 | 75.90 | 66.13 | 9.77 | 8220.79 | 545.53 | 7.58 | 98.62  | 56.19 | 43.02 | 3.26 | 4.32 | 18.45 | 12.84 | 1.52 | 89.00 | 95.80 | 582.34 | 92558.79 |
|             | 2012 | 76.03 | 66.24 | 9.79 | 8119.68 | 601.16 | 8.35 | 98.69  | 48.95 | 50.40 | 4.21 | 4.14 | 18.45 | 12.92 | 1.51 | 89.50 | 96.00 | 598.77 | 92629.43 |
|             | 2013 | 76.14 | 66.34 | 9.81 | 8095.14 | 575.50 | 7.85 | 98.69  | 54.26 | 45.02 | 3.54 | 4.32 | 18.46 | 13.02 | 1.50 | 90.00 | 96.20 | -      | 92697.16 |
|             | 2014 | 76.04 | 66.27 | 9.77 | 7987.53 | 499.57 | 6.72 | 98.14  | 45.57 | 53.57 | 3.60 | 3.12 | 18.48 | 13.13 | 1.48 | 90.50 | 96.30 | -      | 92756.72 |
|             | 2015 | 76.09 | 66.31 | 9.78 | 8113.53 | -      | -    | -      | -     | -     | -    | -    | 18.50 | 13.26 | 1.47 | 90.50 | 96.30 | -      | 92826.72 |
|             | 2016 | 76.13 | 66.38 | 9.75 | 8151.63 | -      | -    | -      | -     | -     | -    | -    | 18.54 | 13.43 | -    | -     | -     | -      | 92892.06 |
|             | 2017 | 75.54 | 66.33 | 9.21 | -       | -      | -    | -      | -     | -     | -    | -    | -     | -     | -    | -     | -     | -      | -        |
| Saint       | 1995 | 70.42 | 61.74 | 8.68 | 4159.20 | 165.70 | 6.72 | 100.00 | 43.77 | 56.23 | 3.78 | 2.94 | 43.38 | 11.31 | 2.70 | 68.20 | 90.80 | 188.11 | 91354.31 |

|             |       |       |       |         |         |        |        |        |       |       |      |       |       |       |      |       |       |          |          |
|-------------|-------|-------|-------|---------|---------|--------|--------|--------|-------|-------|------|-------|-------|-------|------|-------|-------|----------|----------|
| Vincent and | 1996  | 70.32 | 61.67 | 8.65    | 4214.57 | 175.31 | 6.73   | 100.00 | 44.09 | 55.91 | 3.76 | 2.97  | 43.74 | 11.28 | 2.64 | 69.20 | 91.30 | 187.61   | 91292.43 |
|             | 1997  | 70.53 | 61.83 | 8.70    | 4365.19 | 202.92 | 7.48   | 100.00 | 47.78 | 52.22 | 3.91 | 3.57  | 44.10 | 11.23 | 2.58 | 70.20 | 91.90 | 172.73   | 91246.85 |
|             | 1998  | 70.54 | 61.83 | 8.71    | 4547.16 | 200.42 | 6.81   | 100.00 | 50.34 | 49.66 | 3.38 | 3.43  | 44.46 | 11.19 | 2.51 | 71.20 | 92.40 | 213.68   | 91213.23 |
|             | 1999  | 70.35 | 61.67 | 8.68    | 4672.25 | 198.97 | 6.47   | 100.00 | 46.51 | 53.49 | 3.46 | 3.01  | 44.82 | 11.19 | 2.44 | 72.20 | 92.90 | 226.86   | 91205.44 |
|             | 2000  | 70.15 | 61.49 | 8.66    | 4747.96 | 136.94 | 3.73   | 100.00 | 17.73 | 82.27 | 3.07 | 0.66  | 45.19 | 11.24 | 2.38 | 73.20 | 93.50 | 222.54   | 91207.07 |
|             | 2001  | 70.48 | 61.76 | 8.72    | 4825.10 | 145.15 | 3.64   | 100.00 | 19.05 | 80.95 | 2.95 | 0.69  | 45.55 | 11.22 | 2.32 | 74.20 | 94.00 | 223.72   | 91307.62 |
|             | 2002  | 70.43 | 61.73 | 8.71    | 5122.71 | 167.90 | 3.93   | 100.00 | 17.80 | 82.20 | 3.23 | 0.70  | 45.91 | 11.23 | 2.27 | 75.10 | 94.50 | 234.31   | 91414.35 |
|             | 2003  | 70.77 | 62.00 | 8.77    | 5506.25 | 173.67 | 3.91   | 100.00 | 17.92 | 82.08 | 3.21 | 0.70  | 46.27 | 11.26 | 2.23 | 76.10 | 95.10 | 240.08   | 91513.54 |
|             | 2004  | 70.88 | 62.09 | 8.79    | 5724.06 | 178.98 | 3.72   | 100.00 | 18.80 | 81.20 | 3.02 | 0.70  | 46.63 | 11.25 | 2.20 | 76.10 | 95.10 | 259.91   | 91621.16 |
|             | 2005  | 71.08 | 62.25 | 8.83    | 5856.49 | 185.30 | 3.66   | 100.00 | 19.13 | 80.87 | 2.96 | 0.70  | 46.99 | 11.17 | 2.17 | 76.10 | 95.10 | 261.00   | 91709.96 |
|             | 2006  | 71.18 | 62.35 | 8.83    | 6297.32 | 217.80 | 3.88   | 100.00 | 18.02 | 81.98 | 3.18 | 0.70  | 47.35 | 11.02 | 2.15 | 76.10 | 95.10 | 267.91   | 91773.43 |
|             | 2007  | 71.33 | 62.46 | 8.86    | 6189.77 | 245.91 | 3.92   | 100.00 | 82.14 | 82.14 | 3.22 | 0.70  | 47.71 | 10.79 | 2.13 | 76.10 | 95.10 | 276.97   | 91835.49 |
|             | 2008  | 71.50 | 62.60 | 8.90    | 6595.31 | 299.19 | 4.70   | 100.00 | 15.97 | 84.03 | 3.95 | 0.75  | 48.07 | 10.53 | 2.11 | -     | 95.10 | 284.79   | 91889.41 |
|             | 2009  | 71.57 | 62.65 | 8.92    | 6451.66 | 316.93 | 5.13   | 100.00 | 15.59 | 84.41 | 4.33 | 0.80  | 48.43 | 10.29 | 2.09 | -     | 95.10 | -        | 91946.67 |
|             | 2010  | 71.52 | 62.60 | 8.92    | 6231.77 | 293.45 | 4.71   | 100.00 | 18.05 | 81.95 | 3.86 | 0.85  | 48.79 | 10.09 | 2.07 | -     | 95.10 | 301.56   | 92000.41 |
|             | 2011  | 71.54 | 62.61 | 8.93    | 6204.16 | 309.10 | 4.99   | 100.00 | 18.01 | 81.99 | 4.09 | 0.90  | 49.14 | 10.14 | 2.05 | -     | 95.10 | 310.88   | 92033.34 |
|             | 2012  | 71.48 | 62.57 | 8.92    | 6290.57 | 538.44 | 8.48   | 100.00 | 48.06 | 51.94 | 4.40 | 4.07  | 49.50 | 10.24 | 2.02 | -     | 95.10 | 319.22   | 92060.78 |
|             | 2013  | 71.12 | 62.27 | 8.85    | 6406.30 | 342.49 | 5.21   | 100.00 | 17.28 | 82.72 | 4.31 | 0.90  | 49.85 | 10.37 | 2.00 | -     | 95.10 | -        | 92104.47 |
| 2014        | 71.32 | 62.44 | 8.88  | 6483.32 | 575.06  | 8.63   | 100.00 | 49.19  | 50.81 | 4.39  | 4.25 | 50.20 | 10.54 | 1.98  | -    | 95.10 | -     | 92142.18 |          |
| 2015        | 71.47 | 62.56 | 8.91  | 6566.09 | -       | -      | -      | -      | -     | -     | -    | 50.55 | 10.75 | 1.95  | -    | 95.10 | -     | 92204.07 |          |
| 2016        | 71.64 | 62.70 | 8.94  | 6676.62 | -       | -      | -      | -      | -     | -     | -    | 50.90 | 11.00 | -     | -    | -     | -     | 92276.37 |          |
| 2017        | 72.29 | 63.46 | 8.83  | -       | -       | -      | -      | -      | -     | -     | -    | -     | -     | -     | -    | -     | -     | -        |          |
| Samoa       | 1995  | 69.60 | 60.97 | 8.63    | 2357.15 | 60.91  | 4.61   | 84.60  | 22.36 | 73.57 | 3.39 | 1.22  | 21.53 | 7.56  | 4.75 | 92.50 | 91.10 | 279.86   | 84879.81 |
|             | 1996  | 69.77 | 61.11 | 8.65    | 2509.76 | 61.72  | 4.17   | 84.06  | 23.44 | 72.11 | 3.01 | 1.16  | 21.62 | 7.74  | 4.69 | 92.40 | 91.60 | 288.65   | 84884.79 |
|             | 1997  | 69.92 | 61.25 | 8.68    | 2512.49 | 73.93  | 4.64   | 85.35  | 23.97 | 71.92 | 3.34 | 1.30  | 21.71 | 7.90  | 4.64 | 92.40 | 92.00 | 306.32   | 84886.07 |
|             | 1998  | 70.10 | 61.39 | 8.71    | 2556.01 | 75.16  | 5.17   | 84.80  | 20.35 | 76.00 | 3.93 | 1.24  | 21.80 | 8.02  | 4.59 | 92.30 | 92.40 | 299.83   | 84879.96 |
|             | 1999  | 70.18 | 61.45 | 8.72    | 2600.24 | 83.02  | 5.60   | 85.53  | 20.28 | 76.29 | 4.27 | 1.33  | 21.89 | 8.11  | 4.54 | 92.30 | 92.90 | 305.65   | 84857.89 |
|             | 2000  | 70.30 | 61.55 | 8.74    | 2766.53 | 79.08  | 5.31   | 85.13  | 19.16 | 77.49 | 4.12 | 1.20  | 21.98 | 8.16  | 4.50 | 92.20 | 93.30 | 318.53   | 84895.24 |
|             | 2001  | 70.45 | 61.68 | 8.77    | 2942.41 | 79.07  | 5.16   | 82.41  | 20.94 | 74.59 | 3.85 | 1.31  | 22.07 | 8.27  | 4.48 | 92.20 | 93.80 | 324.44   | 84942.86 |

|      |       |       |      |         |        |      |       |       |       |      |      |       |      |      |       |       |        |          |
|------|-------|-------|------|---------|--------|------|-------|-------|-------|------|------|-------|------|------|-------|-------|--------|----------|
| 2002 | 70.62 | 61.83 | 8.80 | 3052.56 | 84.10  | 5.01 | 80.19 | 17.15 | 78.62 | 3.94 | 1.07 | 21.94 | 8.38 | 4.46 | 92.10 | 94.20 | 314.98 | 84984.81 |
| 2003 | 70.77 | 61.95 | 8.82 | 3171.01 | 95.59  | 4.71 | 81.37 | 18.28 | 77.53 | 3.65 | 1.06 | 21.70 | 8.50 | 4.45 | 92.10 | 94.60 | 314.08 | 85029.47 |
| 2004 | 70.91 | 62.06 | 8.85 | 3296.90 | 107.44 | 4.45 | 63.20 | 12.08 | 80.88 | 3.60 | 0.85 | 21.46 | 8.61 | 4.46 | 92.00 | 95.00 | 312.54 | 85093.88 |
| 2005 | 71.06 | 62.18 | 8.87 | 3412.03 | 115.60 | 4.47 | 64.06 | 12.61 | 80.31 | 3.59 | 0.88 | 21.22 | 8.71 | 4.46 | 92.00 | 95.50 | 307.21 | 85148.23 |
| 2006 | 71.20 | 62.30 | 8.90 | 3456.82 | 130.65 | 4.68 | 58.01 | 9.32  | 83.94 | 3.93 | 0.75 | 20.98 | 8.76 | 4.46 | 91.90 | 95.90 | 326.16 | 85177.99 |
| 2007 | 71.24 | 62.32 | 8.92 | 3651.35 | 164.37 | 5.25 | 63.72 | 85.89 | 85.89 | 4.51 | 0.74 | 20.75 | 8.81 | 4.45 | 91.80 | 96.30 | 326.94 | 85222.13 |
| 2008 | 71.34 | 62.40 | 8.95 | 3663.28 | 152.58 | 4.52 | 62.38 | 9.59  | 84.63 | 3.82 | 0.69 | 20.52 | 8.87 | 4.43 | 91.80 | 96.80 | 330.24 | 85260.89 |
| 2009 | 69.27 | 60.66 | 8.60 | 3462.61 | 160.04 | 5.04 | 62.60 | 8.71  | 86.08 | 4.34 | 0.70 | 20.30 | 8.92 | 4.39 | 91.70 | 97.20 | 330.71 | 85324.05 |
| 2010 | 71.39 | 62.43 | 8.96 | 3453.43 | 201.42 | 5.70 | 62.60 | 7.90  | 87.39 | 4.99 | 0.72 | 20.08 | 8.97 | 4.34 | 91.70 | 97.60 | 340.98 | 85404.94 |
| 2011 | 71.39 | 62.43 | 8.96 | 3624.57 | 235.76 | 5.80 | 62.60 | 7.52  | 87.99 | 5.10 | 0.70 | 19.86 | 9.04 | 4.28 | 91.60 | 98.10 | 348.88 | 85472.67 |
| 2012 | 71.30 | 62.36 | 8.94 | 3609.74 | 213.57 | 5.02 | 62.60 | 8.46  | 86.48 | 4.34 | 0.68 | 19.64 | 9.09 | 4.21 | 91.60 | 98.50 | 356.09 | 85604.60 |
| 2013 | 71.52 | 62.56 | 8.97 | 3510.92 | 288.79 | 6.91 | 62.60 | 6.26  | 89.99 | 6.22 | 0.69 | 19.44 | 9.12 | 4.15 | 91.50 | 99.00 | -      | 85698.02 |
| 2014 | 71.58 | 62.61 | 8.97 | 3524.60 | 301.10 | 7.22 | 62.60 | 5.88  | 90.60 | 6.54 | 0.68 | 19.26 | 9.19 | 4.09 | 91.50 | 99.00 | -      | 85823.14 |
| 2015 | 71.66 | 62.67 | 8.99 | 3555.06 | -      | -    | -     | -     | -     | -    | -    | 19.10 | 9.29 | 4.03 | 91.50 | 99.00 | -      | 85966.62 |
| 2016 | 71.89 | 62.87 | 9.02 | 3782.40 | -      | -    | -     | -     | -     | -    | -    | 18.96 | 9.47 | -    | -     | -     | -      | 86137.04 |
| 2017 | 72.88 | 63.26 | 9.62 | -       | -      | -    | -     | -     | -     | -    | -    | -     | -    | -    | -     | -     | -      | -        |

|                          |       |       |       |         |        |       |       |       |       |       |      |       |       |      |       |       |        |          |          |
|--------------------------|-------|-------|-------|---------|--------|-------|-------|-------|-------|-------|------|-------|-------|------|-------|-------|--------|----------|----------|
| Sao Tome<br>and Principe | 1995  | 63.77 | 55.60 | 8.17    | -      | 59.96 | 7.64  | 71.80 | 45.45 | 36.70 | 2.81 | 4.84  | 48.63 | 9.40 | 5.55  | 18.20 | 74.00  | 107.21   | 88279.61 |
|                          | 1996  | 63.61 | 55.52 | 8.10    | -      | 68.40 | 6.81  | 74.16 | 52.73 | 28.89 | 1.97 | 4.84  | 49.59 | 9.36 | 5.49  | 18.30 | 74.20  | 107.84   | 88261.37 |
|                          | 1997  | 63.64 | 55.58 | 8.07    | -      | 55.87 | 8.32  | 65.18 | 42.15 | 35.33 | 2.94 | 5.38  | 50.55 | 9.33 | 5.44  | 18.40 | 74.40  | 111.49   | 88237.93 |
|                          | 1998  | 63.78 | 55.72 | 8.07    | -      | 38.23 | 7.36  | 75.84 | 45.85 | 39.54 | 2.91 | 4.45  | 51.51 | 9.30 | 5.38  | 18.60 | 74.50  | 104.97   | 88215.48 |
|                          | 1999  | 64.16 | 56.04 | 8.12    | -      | 46.37 | 8.49  | 71.15 | 38.83 | 45.42 | 3.86 | 4.63  | 52.47 | 9.28 | 5.33  | 19.70 | 76.40  | 109.36   | 88213.43 |
|                          | 2000  | 64.54 | 56.36 | 8.18    | 854.42 | 46.80 | 8.86  | 76.13 | 43.27 | 43.16 | 3.82 | 5.04  | 53.42 | 9.22 | 5.28  | 20.90 | 78.20  | 206.90   | 88232.63 |
|                          | 2001  | 64.97 | 56.75 | 8.23    | 862.90 | 53.02 | 10.28 | 64.26 | 40.55 | 36.90 | 3.79 | 6.49  | 54.38 | 9.16 | 5.23  | 22.10 | 80.00  | 187.96   | 88204.83 |
|                          | 2002  | 65.30 | 57.05 | 8.26    | 863.49 | 57.84 | 10.21 | 61.65 | 38.43 | 37.67 | 3.85 | 6.36  | 55.33 | 9.06 | 5.17  | 23.30 | 81.80  | 190.50   | 88212.65 |
|                          | 2003  | 65.74 | 57.42 | 8.32    | 898.65 | 74.33 | 11.12 | 70.35 | 32.14 | 54.31 | 6.04 | 5.08  | 56.25 | 8.93 | 5.12  | 24.50 | 83.50  | 210.28   | 88206.01 |
|                          | 2004  | 66.03 | 57.68 | 8.35    | 911.01 | 71.79 | 9.94  | 76.16 | 36.78 | 51.71 | 5.14 | 4.80  | 57.14 | 8.74 | 5.07  | 25.70 | 85.30  | 170.01   | 88207.91 |
| 2005                     | 66.13 | 57.75 | 8.38  | 952.68  | 81.79  | 10.04 | 73.06 | 34.53 | 52.73 | 5.29  | 4.74 | 58.01 | 8.50  | 5.02 | 26.90 | 87.00 | 177.25 | 88223.79 |          |
| 2006                     | 66.84 | 58.38 | 8.46  | 1015.40 | 69.14  | 7.84  | 77.88 | 52.64 | 32.41 | 2.54  | 5.30 | 58.85 | 8.24  | 4.97 | 28.10 | 88.70 | 155.28 | 88223.73 |          |
| 2007                     | 67.31 | 58.78 | 8.54  | 1024.18 | 70.14  | 7.44  | 73.80 | 28.74 | 28.74 | 2.14  | 5.30 | 59.66 | 7.95  | 4.93 | 29.40 | 90.40 | 169.71 | 88219.95 |          |

|      |       |       |      |         |        |      |       |       |       |      |      |       |      |      |       |       |        |          |
|------|-------|-------|------|---------|--------|------|-------|-------|-------|------|------|-------|------|------|-------|-------|--------|----------|
| 2008 | 67.70 | 59.10 | 8.60 | 1082.71 | 69.40  | 5.66 | 62.56 | 44.97 | 28.12 | 1.59 | 4.07 | 60.43 | 7.62 | 4.88 | 30.60 | 92.10 | 175.96 | 88211.69 |
| 2009 | 68.44 | 59.73 | 8.72 | 1083.66 | 86.35  | 6.65 | 48.10 | 29.97 | 37.69 | 2.51 | 4.15 | 61.19 | 7.29 | 4.84 | 31.80 | 93.70 | 177.02 | 88203.91 |
| 2010 | 68.91 | 60.12 | 8.78 | 1129.75 | 66.50  | 5.24 | 57.40 | 29.62 | 48.41 | 2.54 | 2.70 | 61.91 | 6.96 | 4.79 | 33.00 | 95.30 | 185.45 | 88193.69 |
| 2011 | 69.29 | 60.45 | 8.84 | 1152.90 | 81.22  | 5.44 | 46.32 | 24.15 | 47.87 | 2.61 | 2.84 | 62.60 | 6.66 | 4.74 | 34.30 | 97.00 | 190.74 | 88191.97 |
| 2012 | 69.29 | 60.50 | 8.79 | 1162.54 | 133.62 | 8.60 | 17.14 | 12.20 | 28.85 | 2.48 | 6.12 | 63.27 | 6.37 | 4.69 | 34.40 | 97.00 | 195.49 | 88204.08 |
| 2013 | 69.73 | 60.87 | 8.86 | 1191.44 | 182.78 | 9.76 | 16.25 | 10.28 | 36.75 | 3.59 | 6.17 | 63.90 | 6.10 | 4.64 | 34.50 | 97.00 | -      | 88228.87 |
| 2014 | 70.03 | 61.13 | 8.90 | 1241.00 | 165.55 | 8.35 | 19.72 | 11.19 | 43.24 | 3.61 | 4.74 | 64.51 | 5.84 | 4.58 | 34.60 | 97.10 | -      | 88257.86 |
| 2015 | 70.32 | 61.38 | 8.93 | 1260.32 | -      | -    | -     | -     | -     | -    | -    | 65.09 | 5.61 | 4.52 | 34.70 | 97.10 | -      | 88306.12 |
| 2016 | 70.60 | 61.65 | 8.95 | 1283.89 | -      | -    | -     | -     | -     | -    | -    | 65.65 | 5.45 | -    | -     | -     | -      | 88369.89 |
| 2017 | 69.93 | 60.93 | 9.00 | -       | -      | -    | -     | -     | -     | -    | -    | -     | -    | -    | -     | -     | -      | -        |

|              |      |       |       |       |          |         |      |       |       |       |      |      |       |      |      |        |       |           |          |
|--------------|------|-------|-------|-------|----------|---------|------|-------|-------|-------|------|------|-------|------|------|--------|-------|-----------|----------|
| Saudi Arabia | 1995 | 72.69 | 62.31 | 10.39 | 18648.86 | 221.29  | 2.93 | 72.28 | 34.25 | 52.62 | 1.54 | 1.39 | 78.67 | 5.26 | 4.98 | 93.90  | 93.30 | 262037.70 | 89818.10 |
|              | 1996 | 72.73 | 62.38 | 10.34 | 18744.78 | 239.01  | 2.93 | 71.47 | 32.06 | 55.14 | 1.62 | 1.32 | 78.91 | 5.21 | 4.75 | 94.40  | 93.70 | 276181.97 | 89913.23 |
|              | 1997 | 72.67 | 62.39 | 10.28 | 18588.30 | 251.94  | 3.03 | 70.97 | 29.90 | 57.87 | 1.75 | 1.28 | 79.15 | 5.16 | 4.53 | 95.00  | 94.00 | 280673.77 | 89994.40 |
|              | 1998 | 72.63 | 62.41 | 10.22 | 18763.59 | 237.86  | 3.31 | 72.03 | 29.72 | 58.74 | 1.95 | 1.37 | 79.38 | 5.13 | 4.33 | 95.60  | 94.30 | 292876.65 | 90072.92 |
|              | 1999 | 72.63 | 62.46 | 10.17 | 17690.92 | 316.80  | 4.10 | 69.04 | 21.82 | 68.39 | 2.80 | 1.30 | 79.62 | 5.11 | 4.14 | 96.20  | 94.70 | 295772.02 | 90145.67 |
|              | 2000 | 72.85 | 62.68 | 10.17 | 18263.23 | 373.09  | 4.24 | 66.07 | 18.46 | 72.06 | 3.05 | 1.18 | 79.85 | 5.10 | 3.97 | 96.80  | 95.00 | 310713.50 | 90218.53 |
|              | 2001 | 72.98 | 62.81 | 10.17 | 17585.39 | 373.30  | 4.49 | 65.68 | 18.04 | 72.54 | 3.26 | 1.23 | 80.08 | 5.01 | 3.83 | 97.30  | 95.40 | 321603.52 | 90300.50 |
|              | 2002 | 73.14 | 62.97 | 10.17 | 16619.43 | 356.18  | 4.28 | 66.91 | 18.63 | 72.16 | 3.09 | 1.19 | 80.30 | 4.91 | 3.71 | 97.90  | 95.70 | 336300.49 | 90418.72 |
|              | 2003 | 73.31 | 63.14 | 10.17 | 17954.95 | 369.17  | 4.02 | 65.51 | 18.29 | 72.07 | 2.90 | 1.12 | 80.53 | 4.83 | 3.60 | 98.50  | 96.00 | 355029.43 | 90554.94 |
|              | 2004 | 73.50 | 63.32 | 10.18 | 18822.73 | 385.49  | 3.58 | 63.65 | 18.15 | 71.48 | 2.56 | 1.02 | 80.75 | 4.75 | 3.51 | 99.10  | 96.40 | -         | 90707.74 |
|              | 2005 | 73.74 | 63.57 | 10.17 | 19309.31 | 453.80  | 3.42 | 59.96 | 16.49 | 72.49 | 2.48 | 0.94 | 80.98 | 4.69 | 3.42 | 99.70  | 96.70 | -         | 90863.40 |
|              | 2006 | 73.98 | 63.79 | 10.19 | 19304.55 | 526.31  | 3.55 | 61.34 | 15.70 | 74.41 | 2.64 | 0.91 | 81.20 | 4.62 | 3.33 | 100.00 | 97.00 | -         | 90990.95 |
|              | 2007 | 74.26 | 64.00 | 10.26 | 19136.16 | 556.16  | 3.49 | 60.84 | 71.90 | 71.90 | 2.51 | 0.98 | 81.43 | 4.57 | 3.24 | 100.00 | 97.00 | 419853.00 | 91113.90 |
|              | 2008 | 74.53 | 64.23 | 10.30 | 19792.72 | 557.87  | 2.87 | 58.67 | 20.05 | 65.83 | 1.89 | 0.98 | 81.65 | 4.52 | 3.15 | 100.00 | 97.00 | 446765.12 | 91244.30 |
|              | 2009 | 74.72 | 64.40 | 10.32 | 18861.11 | 639.74  | 4.09 | 60.65 | 19.27 | 68.23 | 2.79 | 1.30 | 81.87 | 4.48 | 3.06 | 100.00 | 97.00 | 471266.33 | 91377.34 |
|              | 2010 | 74.96 | 64.64 | 10.32 | 19259.59 | 655.07  | 3.49 | 56.44 | 19.84 | 64.85 | 2.27 | 1.23 | 82.08 | 4.43 | 2.96 | 100.00 | 97.00 | -         | 91519.42 |
|              | 2011 | 75.18 | 64.80 | 10.38 | 20575.50 | 829.25  | 3.57 | 54.34 | 16.30 | 70.00 | 2.50 | 1.07 | 82.30 | 4.36 | 2.87 | 100.00 | 97.00 | 514967.26 | 91667.47 |
|              | 2012 | 75.42 | 65.01 | 10.41 | 21056.35 | 961.34  | 3.86 | 54.98 | 15.81 | 71.24 | 2.75 | 1.11 | 82.51 | 4.29 | 2.78 | 100.00 | 97.00 | -         | 91819.10 |
|              | 2013 | 75.90 | 65.40 | 10.50 | 21005.01 | 1052.10 | 4.25 | 55.51 | 14.97 | 73.03 | 3.10 | 1.14 | 82.72 | 4.24 | 2.70 | 100.00 | 97.00 | -         | 91981.48 |

|         |      |       |       |       |          |         |      |       |       |       |      |      |       |       |      |        |       |          |          |
|---------|------|-------|-------|-------|----------|---------|------|-------|-------|-------|------|------|-------|-------|------|--------|-------|----------|----------|
|         | 2014 | 76.37 | 65.77 | 10.61 | 21183.46 | 1147.45 | 4.68 | 56.17 | 14.31 | 74.52 | 3.49 | 1.19 | 82.93 | 4.24  | 2.64 | 100.00 | 97.00 | -        | 92138.38 |
|         | 2015 | 76.52 | 65.88 | 10.65 | 21507.96 | -       | -    | -     | -     | -     | -    | -    | 83.13 | 4.30  | 2.58 | 100.00 | 97.00 | -        | 92296.79 |
|         | 2016 | 77.10 | 66.38 | 10.72 | 21395.36 | -       | -    | -     | -     | -     | -    | -    | 83.33 | 4.44  | -    | -      | -     | -        | 92434.20 |
|         | 2017 | 76.86 | 66.32 | 10.54 | -        | -       | -    | -     | -     | -     | -    | -    | -     | -     | -    | -      | -     | -        | -        |
| Senegal | 1995 | 58.36 | 50.85 | 7.51  | 810.57   | 22.04   | 3.93 | 95.14 | 64.19 | 32.53 | 1.28 | 2.65 | 39.62 | 6.07  | 6.00 | 37.90  | 63.70 | 12144.98 | 88284.62 |
|         | 1996 | 58.56 | 51.06 | 7.51  | 805.92   | 23.14   | 4.08 | 93.69 | 59.64 | 36.33 | 1.48 | 2.60 | 39.77 | 6.11  | 5.88 | 38.40  | 64.40 | 12591.43 | 88299.89 |
|         | 1997 | 58.81 | 51.30 | 7.51  | 811.00   | 20.09   | 3.94 | 93.21 | 62.83 | 32.60 | 1.28 | 2.66 | 39.91 | 6.13  | 5.77 | 38.90  | 65.20 | 13138.66 | 88316.38 |
|         | 1998 | 58.97 | 51.46 | 7.51  | 838.61   | 21.25   | 3.97 | 92.65 | 62.02 | 33.06 | 1.31 | 2.65 | 40.06 | 6.13  | 5.67 | 39.30  | 65.90 | 44963.52 | 88363.50 |
|         | 1999 | 59.10 | 51.60 | 7.50  | 870.79   | 24.01   | 4.49 | 92.47 | 56.61 | 38.78 | 1.74 | 2.75 | 40.20 | 6.12  | 5.57 | 39.80  | 66.70 | 56357.77 | 88404.75 |
|         | 2000 | 59.66 | 52.08 | 7.57  | 877.00   | 21.98   | 4.63 | 91.60 | 54.11 | 40.93 | 1.90 | 2.74 | 40.35 | 6.11  | 5.47 | 40.30  | 67.40 | 48632.88 | 88439.73 |
|         | 2001 | 60.01 | 52.40 | 7.61  | 894.51   | 24.00   | 4.98 | 91.07 | 52.01 | 42.89 | 2.14 | 2.84 | 40.49 | 6.10  | 5.39 | 40.70  | 68.20 | 58818.34 | 88437.26 |
|         | 2002 | 60.22 | 52.58 | 7.64  | 877.65   | 26.00   | 5.06 | 90.42 | 55.59 | 38.52 | 1.95 | 3.11 | 40.64 | 6.09  | 5.31 | 41.20  | 68.90 | 55038.56 | 88435.28 |
|         | 2003 | 60.98 | 53.22 | 7.76  | 912.25   | 34.70   | 5.40 | 89.73 | 54.97 | 38.74 | 2.09 | 3.31 | 40.78 | 6.06  | 5.25 | 41.70  | 69.60 | 34578.80 | 88434.52 |
|         | 2004 | 61.39 | 53.57 | 7.82  | 940.69   | 41.60   | 5.68 | 88.50 | 55.49 | 37.30 | 2.12 | 3.56 | 40.94 | 6.02  | 5.20 | 42.10  | 70.40 | 49186.65 | 88411.45 |
|         | 2005 | 61.74 | 53.87 | 7.87  | 967.50   | 41.37   | 5.35 | 77.37 | 34.27 | 55.70 | 2.98 | 2.37 | 41.12 | 5.97  | 5.16 | 42.60  | 71.10 | 50288.84 | 88402.96 |
|         | 2006 | 62.17 | 54.26 | 7.91  | 965.11   | 44.00   | 5.44 | 76.72 | 32.32 | 57.86 | 3.15 | 2.29 | 41.31 | 5.96  | 5.13 | 43.10  | 71.80 | 58446.31 | 88369.89 |
|         | 2007 | 62.69 | 54.69 | 7.99  | 985.75   | 44.79   | 4.72 | 78.37 | 49.40 | 49.40 | 2.33 | 2.39 | 41.52 | 5.93  | 5.11 | 43.60  | 72.60 | 47429.89 | 88331.73 |
|         | 2008 | 63.20 | 55.13 | 8.07  | 994.38   | 54.02   | 4.94 | 76.03 | 37.09 | 51.21 | 2.53 | 2.41 | 41.74 | 5.89  | 5.10 | 44.10  | 73.30 | 51876.51 | 88316.50 |
|         | 2009 | 63.64 | 55.50 | 8.14  | 990.32   | 48.96   | 4.81 | 77.41 | 37.37 | 51.72 | 2.49 | 2.32 | 41.98 | 5.84  | 5.08 | 44.60  | 74.10 | 47324.76 | 88292.69 |
|         | 2010 | 64.04 | 55.85 | 8.19  | 1002.53  | 46.13   | 4.62 | 77.41 | 37.73 | 51.25 | 2.37 | 2.25 | 42.23 | 5.78  | 5.06 | 45.10  | 74.80 | 53407.57 | 88303.16 |
|         | 2011 | 64.44 | 56.22 | 8.21  | 990.68   | 47.75   | 4.42 | 77.41 | 37.45 | 51.62 | 2.28 | 2.14 | 42.50 | 5.74  | 5.04 | 45.60  | 75.60 | 53810.05 | 88356.56 |
|         | 2012 | 64.81 | 56.57 | 8.23  | 1003.99  | 43.94   | 4.31 | 77.41 | 38.27 | 50.56 | 2.18 | 2.13 | 42.78 | 5.69  | 5.00 | 46.10  | 76.30 | 54185.37 | 88434.47 |
|         | 2013 | 65.17 | 56.92 | 8.26  | 1008.02  | 46.92   | 4.51 | 77.41 | 38.99 | 49.62 | 2.24 | 2.27 | 43.08 | 5.63  | 4.96 | 46.60  | 77.00 | -        | 88521.62 |
|         | 2014 | 65.55 | 57.25 | 8.29  | 1018.39  | 49.53   | 4.66 | 77.41 | 37.28 | 51.83 | 2.42 | 2.25 | 43.39 | 5.59  | 4.90 | 47.10  | 77.80 | -        | 88620.14 |
|         | 2015 | 65.90 | 57.57 | 8.33  | 1052.96  | -       | -    | -     | -     | -     | -    | -    | 43.72 | 5.55  | 4.84 | 47.60  | 78.50 | -        | 88719.55 |
|         | 2016 | 66.24 | 57.89 | 8.35  | 1092.25  | -       | -    | -     | -     | -     | -    | -    | 44.07 | 5.55  | -    | -      | -     | -        | 88815.93 |
|         | 2017 | 68.05 | 58.85 | 9.20  | -        | -       | -    | -     | -     | -     | -    | -    | -     | -     | -    | -      | -     | -        | -        |
| Serbia  | 1995 | 70.67 | 61.92 | 8.74  | 3153.38  | 82.09   | 6.51 | 85.60 | 29.45 | 65.59 | 4.27 | 2.24 | 51.84 | 17.21 | 1.70 | 96.90  | 99.40 | -        | 92120.14 |
|         | 1996 | 71.87 | 62.95 | 8.92  | 3233.10  | 149.82  | 6.51 | 85.59 | 29.44 | 65.60 | 4.27 | 2.24 | 52.11 | 17.93 | -    | 96.90  | 99.40 | -        | 92182.56 |

|      |       |       |       |         |        |       |       |       |       |      |      |       |       |      |       |       |   |          |
|------|-------|-------|-------|---------|--------|-------|-------|-------|-------|------|------|-------|-------|------|-------|-------|---|----------|
| 1997 | 72.02 | 63.08 | 8.95  | 3475.10 | 166.93 | 6.51  | 85.64 | 29.52 | 65.53 | 4.27 | 2.24 | 52.38 | 18.64 | 1.60 | 96.90 | 99.40 | - | 92263.86 |
| 1998 | 71.41 | 62.57 | 8.83  | 3573.09 | 112.52 | 6.57  | 85.98 | 30.10 | 64.99 | 4.27 | 2.30 | 52.65 | 19.31 | -    | 96.90 | 99.40 | - | 92366.76 |
| 1999 | 70.91 | 62.16 | 8.75  | 3150.46 | 64.96  | 6.61  | 86.22 | 30.52 | 64.60 | 4.27 | 2.34 | 52.92 | 19.94 | -    | 96.90 | 99.40 | - | 92470.55 |
| 2000 | 72.13 | 63.18 | 8.96  | 3405.78 | 65.52  | 6.53  | 85.29 | 29.51 | 65.40 | 4.27 | 2.26 | 53.19 | 20.52 | 1.48 | 96.90 | 99.40 | - | 92573.86 |
| 2001 | 72.37 | 63.37 | 9.01  | 3581.97 | 111.31 | 6.89  | 85.58 | 28.40 | 66.81 | 4.60 | 2.28 | 53.46 | 20.97 | 1.58 | 96.90 | 99.40 | - | 92627.95 |
| 2002 | 72.48 | 63.46 | 9.02  | 3840.40 | 174.49 | 8.09  | 85.33 | 23.76 | 72.16 | 5.84 | 2.25 | 53.72 | 21.36 | 1.57 | 96.80 | 99.40 | - | 92663.55 |
| 2003 | 72.67 | 63.62 | 9.05  | 4018.51 | 230.83 | 8.13  | 86.04 | 25.00 | 70.95 | 5.77 | 2.36 | 53.99 | 21.64 | 1.59 | 96.80 | 99.40 | - | 92717.21 |
| 2004 | 72.89 | 63.79 | 9.10  | 4392.28 | 273.00 | 8.24  | 87.70 | 27.32 | 68.85 | 5.67 | 2.57 | 54.26 | 21.81 | 1.57 | 96.80 | 99.40 | - | 92768.72 |
| 2005 | 73.21 | 64.06 | 9.15  | 4649.58 | 304.75 | 8.70  | 88.03 | 29.93 | 66.00 | 5.74 | 2.96 | 54.53 | 21.84 | 1.45 | 96.70 | 99.30 | - | 92824.27 |
| 2006 | 73.54 | 64.32 | 9.23  | 4896.82 | 373.16 | 8.99  | 88.98 | 32.92 | 63.00 | 5.66 | 3.33 | 54.79 | 21.77 | 1.43 | 96.70 | 99.30 | - | 92855.16 |
| 2007 | 73.88 | 64.53 | 9.36  | 5206.25 | 549.47 | 10.02 | 90.16 | 61.37 | 61.37 | 6.15 | 3.87 | 55.06 | 21.58 | 1.38 | 96.70 | 99.30 | - | 92888.46 |
| 2008 | 74.22 | 64.77 | 9.46  | 5509.06 | 672.11 | 10.05 | 92.45 | 35.14 | 61.98 | 6.23 | 3.82 | 55.11 | 21.36 | 1.40 | 96.60 | 99.30 | - | 92936.19 |
| 2009 | 74.44 | 64.92 | 9.52  | 5358.84 | 576.43 | 9.90  | 92.22 | 35.17 | 61.86 | 6.13 | 3.78 | 55.16 | 21.25 | 1.44 | 96.60 | 99.30 | - | 92976.90 |
| 2010 | 74.64 | 65.11 | 9.53  | 5411.88 | 541.02 | 10.09 | 95.55 | 36.43 | 61.87 | 6.24 | 3.85 | 55.21 | 21.32 | 1.40 | 96.60 | 99.30 | - | 93034.57 |
| 2011 | 74.84 | 65.21 | 9.64  | 5531.22 | 627.95 | 9.72  | 95.48 | 36.17 | 62.12 | 6.04 | 3.68 | 55.26 | 21.70 | 1.40 | 96.50 | 99.20 | - | 93012.29 |
| 2012 | 75.09 | 65.39 | 9.69  | 5501.70 | 559.65 | 9.89  | 95.60 | 37.13 | 61.16 | 6.05 | 3.84 | 55.31 | 22.21 | 1.45 | 96.50 | 99.20 | - | 93003.49 |
| 2013 | 75.34 | 65.58 | 9.76  | 5670.71 | 644.55 | 10.12 | 95.95 | 37.06 | 59.16 | 5.98 | 3.91 | 55.37 | 22.85 | 1.43 | 96.50 | 99.20 | - | 92986.78 |
| 2014 | 75.53 | 65.73 | 9.80  | 5593.06 | 632.92 | 10.37 | 95.99 | 36.59 | 61.88 | 6.42 | 3.95 | 55.46 | 23.56 | 1.46 | 96.50 | 99.20 | - | 92984.94 |
| 2015 | 75.74 | 65.87 | 9.86  | 5663.39 | -      | -     | -     | -     | -     | -    | -    | 55.55 | 24.33 | 1.46 | 96.40 | 99.20 | - | 92993.80 |
| 2016 | 75.90 | 66.07 | 9.84  | 5853.14 | -      | -     | -     | -     | -     | -    | -    | 55.67 | 25.26 | -    | -     | -     | - | 92999.13 |
| 2017 | 75.71 | 65.28 | 10.44 | -       | -      | -     | -     | -     | -     | -    | -    | -     | -     | -    | -     | -     | - | -        |

|            |      |       |       |      |         |        |      |       |       |       |      |      |       |       |      |       |       |        |          |
|------------|------|-------|-------|------|---------|--------|------|-------|-------|-------|------|------|-------|-------|------|-------|-------|--------|----------|
| Seychelles | 1996 | 70.01 | 62.03 | 7.98 | 8281.28 | 328.44 | 5.07 | 98.73 | 12.07 | 87.78 | 4.45 | 0.62 | 49.61 | 11.56 | -    | 98.40 | 95.70 | 396.06 | 88209.67 |
|            | 1997 | 70.22 | 62.19 | 8.03 | 9163.69 | 399.74 | 5.57 | 98.73 | 13.32 | 86.51 | 4.82 | 0.75 | 49.72 | 11.74 | 2.10 | 98.40 | 95.70 | 447.49 | 88316.29 |
|            | 1998 | 70.44 | 62.35 | 8.09 | 9741.36 | 379.79 | 4.95 | 98.73 | 15.16 | 84.64 | 4.19 | 0.76 | 49.84 | 11.91 | 2.04 | 98.40 | 95.70 | -      | 88447.56 |
|            | 1999 | 70.70 | 62.55 | 8.16 | 9730.70 | 385.74 | 4.96 | 98.73 | 14.36 | 85.45 | 4.24 | 0.72 | 49.97 | 12.07 | 2.04 | 98.40 | 95.70 | -      | 88578.64 |
|            | 2000 | 70.91 | 62.71 | 8.20 | 9790.27 | 349.83 | 4.62 | 99.17 | 17.86 | 81.99 | 3.79 | 0.83 | 50.12 | 12.22 | 2.08 | 98.40 | 95.70 | -      | 88708.38 |
|            | 2001 | 71.11 | 62.86 | 8.25 | 9559.55 | 335.86 | 4.45 | 98.91 | 15.44 | 84.39 | 3.76 | 0.70 | 50.28 | 11.87 | 1.98 | 98.40 | 95.70 | -      | 88825.67 |
|            | 2002 | 71.29 | 63.00 | 8.29 | 9384.15 | 349.10 | 4.21 | 99.11 | 13.48 | 86.40 | 3.64 | 0.57 | 50.45 | 11.51 | 2.04 | 98.40 | 95.70 | 680.72 | 88929.13 |
|            | 2003 | 71.45 | 63.13 | 8.32 | 8932.20 | 382.15 | 4.64 | 98.70 | 10.60 | 89.26 | 4.15 | 0.50 | 50.64 | 11.14 | 2.10 | 98.40 | 95.70 | 697.09 | 89002.38 |

|      |       |       |      |          |        |      |       |       |       |      |      |       |       |      |       |       |        |          |
|------|-------|-------|------|----------|--------|------|-------|-------|-------|------|------|-------|-------|------|-------|-------|--------|----------|
| 2004 | 71.68 | 63.31 | 8.37 | 8709.78  | 400.98 | 4.17 | 97.45 | 8.42  | 91.36 | 3.81 | 0.36 | 50.84 | 10.77 | 2.00 | 98.40 | 95.70 | -      | 89073.74 |
| 2005 | 71.95 | 63.55 | 8.41 | 9450.28  | 404.69 | 3.91 | 96.62 | 7.11  | 92.64 | 3.62 | 0.29 | 51.06 | 10.39 | 2.20 | 98.40 | 95.70 | -      | 89119.36 |
| 2006 | 72.31 | 63.85 | 8.46 | 10126.29 | 421.60 | 3.73 | 79.92 | 5.81  | 92.73 | 3.46 | 0.27 | 51.28 | 10.39 | 2.10 | 98.40 | 95.70 | -      | 89108.27 |
| 2007 | 72.61 | 64.06 | 8.55 | 11124.66 | 375.67 | 3.30 | 78.62 | 92.70 | 92.70 | 3.06 | 0.24 | 51.52 | 10.46 | 2.24 | 98.40 | 95.70 | 786.52 | 89111.46 |
| 2008 | 72.91 | 64.30 | 8.61 | 10645.09 | 278.32 | 2.64 | 71.30 | 6.26  | 91.21 | 2.41 | 0.23 | 51.78 | 10.62 | 2.30 | 98.40 | 95.70 | 806.42 | 89129.94 |
| 2009 | 73.07 | 64.43 | 8.64 | 10486.19 | 241.85 | 2.64 | 67.70 | 5.72  | 91.55 | 2.41 | 0.22 | 52.04 | 10.83 | 2.40 | 98.40 | 95.70 | 805.94 | 89200.10 |
| 2010 | 73.20 | 64.57 | 8.64 | 10804.68 | 374.52 | 3.59 | 38.14 | 4.09  | 89.28 | 3.21 | 0.39 | 52.32 | 11.06 | 2.10 | 98.40 | 95.70 | 854.07 | 89301.13 |
| 2011 | 73.33 | 64.63 | 8.70 | 11967.36 | 384.30 | 3.38 | 88.21 | 4.79  | 94.57 | 3.20 | 0.18 | 52.61 | 11.04 | 2.40 | 98.40 | 95.70 | 883.83 | 89263.24 |
| 2012 | 73.47 | 64.75 | 8.73 | 12633.89 | 489.97 | 4.08 | 35.43 | 2.48  | 93.01 | 3.80 | 0.29 | 52.92 | 11.03 | 2.40 | 98.40 | 95.70 | 910.29 | 89244.86 |
| 2013 | 73.52 | 64.79 | 8.74 | 13153.04 | 530.31 | 3.58 | 29.44 | 2.00  | 93.22 | 3.34 | 0.24 | 53.23 | 11.09 | 2.40 | 98.40 | 95.70 | -      | 89241.13 |
| 2014 | 73.48 | 64.75 | 8.72 | 13379.59 | 494.13 | 3.37 | 30.01 | 2.34  | 92.21 | 3.11 | 0.26 | 53.56 | 11.31 | 2.30 | 98.40 | 95.70 | -      | 89249.67 |
| 2015 | 73.56 | 64.81 | 8.74 | 13542.23 | -      | -    | -     | -     | -     | -    | -    | 53.89 | 11.71 | 2.30 | 98.40 | 95.70 | -      | 89285.66 |
| 2016 | 73.68 | 64.95 | 8.73 | 13963.59 | -      | -    | -     | -     | -     | -    | -    | 54.21 | 12.04 | -    | -     | -     | -      | 89344.83 |
| 2017 | 73.62 | 64.96 | 8.66 | -        | -      | -    | -     | -     | -     | -    | -    | -     | -     | -    | -     | -     | -      | -        |

|              |      |       |       |      |        |       |       |       |       |       |      |       |       |      |      |       |       |          |          |
|--------------|------|-------|-------|------|--------|-------|-------|-------|-------|-------|------|-------|-------|------|------|-------|-------|----------|----------|
| Sierra Leone | 1995 | 49.84 | 43.12 | 6.72 | 318.28 | 25.76 | 11.35 | 93.02 | 73.45 | 21.03 | 2.39 | 8.97  | 34.43 | 4.95 | 6.61 | 10.70 | 42.00 | 8960.42  | 90363.95 |
|              | 1996 | 51.20 | 44.26 | 6.94 | 323.29 | 27.23 | 11.08 | 92.83 | 74.71 | 19.52 | 2.16 | 8.92  | 34.67 | 4.94 | 6.56 | 10.80 | 43.00 | 8920.96  | 90287.81 |
|              | 1997 | 50.70 | 43.87 | 6.83 | 302.66 | 25.65 | 11.59 | 93.62 | 73.33 | 21.68 | 2.51 | 9.08  | 34.91 | 4.88 | 6.51 | 11.00 | 44.00 | 9166.18  | 90243.30 |
|              | 1998 | 48.96 | 42.42 | 6.55 | 304.65 | 18.93 | 10.92 | 93.46 | 75.94 | 18.74 | 2.05 | 8.87  | 35.14 | 4.78 | 6.46 | 11.10 | 45.10 | 18981.62 | 90205.11 |
|              | 1999 | 49.04 | 42.46 | 6.58 | 292.96 | 20.61 | 12.16 | 92.49 | 69.18 | 25.21 | 3.06 | 9.09  | 35.38 | 4.63 | 6.39 | 11.20 | 46.10 | 25037.14 | 90200.92 |
|              | 2000 | 50.89 | 43.98 | 6.91 | 303.79 | 21.35 | 13.63 | 93.13 | 69.26 | 25.63 | 3.49 | 10.14 | 35.63 | 4.45 | 6.32 | 11.30 | 47.20 | 14763.85 | 90195.90 |
|              | 2001 | 51.29 | 44.36 | 6.93 | 271.69 | 30.27 | 11.83 | 94.87 | 72.23 | 23.86 | 2.82 | 9.01  | 35.87 | 4.47 | 6.24 | 11.50 | 48.20 | 32393.59 | 90214.35 |
|              | 2002 | 51.35 | 44.46 | 6.89 | 327.97 | 33.51 | 11.96 | 94.86 | 71.34 | 24.79 | 2.96 | 9.00  | 36.11 | 4.47 | 6.16 | 11.60 | 49.20 | 22463.63 | 90240.83 |
|              | 2003 | 51.70 | 44.78 | 6.92 | 342.02 | 34.50 | 11.69 | 95.10 | 72.46 | 23.81 | 2.78 | 8.91  | 36.35 | 4.46 | 6.07 | 11.70 | 50.20 | 20892.19 | 90244.06 |
|              | 2004 | 52.09 | 45.13 | 6.96 | 347.90 | 34.27 | 11.66 | 91.28 | 70.27 | 23.01 | 2.68 | 8.98  | 36.60 | 4.44 | 5.97 | 11.80 | 51.30 | 21206.33 | 90241.50 |
|              | 2005 | 52.44 | 45.42 | 7.02 | 348.94 | 39.31 | 12.25 | 84.28 | 65.86 | 21.85 | 2.68 | 9.57  | 36.84 | 4.42 | 5.86 | 11.90 | 52.30 | 14869.18 | 90227.12 |
|              | 2006 | 52.87 | 45.86 | 7.01 | 356.24 | 38.39 | 10.68 | 88.55 | 72.29 | 18.37 | 1.96 | 8.72  | 37.10 | 4.48 | 5.75 | 12.10 | 53.30 | 26983.21 | 90153.17 |
|              | 2007 | 53.21 | 46.21 | 6.99 | 374.28 | 40.51 | 10.12 | 94.30 | 16.26 | 16.26 | 1.65 | 8.47  | 37.36 | 4.52 | 5.62 | 12.20 | 54.30 | 28565.22 | 90071.97 |
|              | 2008 | 53.82 | 46.79 | 7.03 | 384.90 | 46.70 | 10.29 | 96.48 | 79.72 | 17.37 | 1.79 | 8.50  | 37.65 | 4.54 | 5.49 | 12.30 | 55.40 | 33083.70 | 90014.09 |
|              | 2009 | 54.31 | 47.24 | 7.07 | 393.55 | 57.07 | 13.13 | 76.70 | 63.81 | 16.81 | 2.21 | 10.93 | 37.94 | 4.54 | 5.35 | 12.50 | 56.40 | 17509.10 | 89966.77 |

|           |       |       |       |        |          |         |       |       |       |       |      |       |        |       |       |        |          |          |          |
|-----------|-------|-------|-------|--------|----------|---------|-------|-------|-------|-------|------|-------|--------|-------|-------|--------|----------|----------|----------|
| 2010      | 55.04 | 47.89 | 7.15  | 405.13 | 46.06    | 10.32   | 85.81 | 65.88 | 23.23 | 2.40  | 7.92 | 38.24 | 4.53   | 5.20  | 12.60 | 57.40  | 11647.49 | 89957.37 |          |
| 2011      | 55.70 | 48.52 | 7.19  | 414.79 | 59.47    | 11.98   | 83.62 | 65.15 | 22.09 | 2.65  | 9.34 | 38.56 | 4.58   | 5.06  | 12.70 | 58.50  | 11731.17 | 89939.14 |          |
| 2012      | 56.44 | 49.18 | 7.26  | 466.86 | 70.45    | 11.24   | 78.33 | 64.52 | 17.63 | 1.98  | 9.25 | 38.89 | 4.61   | 4.92  | 12.80 | 59.50  | 11810.89 | 89933.54 |          |
| 2013      | 57.38 | 50.02 | 7.36  | 550.88 | 92.40    | 11.59   | 73.45 | 62.70 | 14.63 | 1.69  | 9.89 | 39.23 | 4.62   | 4.79  | 13.00 | 60.60  | -        | 89945.20 |          |
| 2014      | 53.87 | 47.17 | 6.70  | 563.17 | 85.91    | 11.09   | 73.43 | 60.96 | 16.99 | 1.88  | 9.21 | 39.58 | 4.60   | 4.67  | 13.10 | 61.60  | -        | 89946.94 |          |
| 2015      | 57.62 | 50.31 | 7.30  | 438.00 | -        | -       | -     | -     | -     | -     | -    | 39.94 | 4.57   | 4.56  | 13.30 | 62.60  | -        | 89966.48 |          |
| 2016      | 59.15 | 51.63 | 7.52  | 455.59 | -        | -       | -     | -     | -     | -     | -    | 40.32 | 4.59   | -     | -     | -      | -        | 89987.36 |          |
| 2017      | 60.42 | 52.09 | 8.33  | -      | -        | -       | -     | -     | -     | -     | -    | -     | -      | -     | -     | -      | -        | -        |          |
| Singapore | 1995  | 77.36 | 68.39 | 8.98   | 29008.50 | 740.80  | 2.94  | 96.91 | 48.83 | 49.61 | 1.46 | 1.48  | 100.00 | 8.89  | 1.67  | 99.40  | 100.00   | -        | 86377.64 |
|           | 1996  | 77.70 | 68.66 | 9.04   | 29951.02 | 771.75  | 2.86  | 96.54 | 49.52 | 48.70 | 1.39 | 1.47  | 100.00 | 9.14  | 1.66  | 99.50  | 100.00   | -        | 86247.01 |
|           | 1997  | 78.17 | 69.05 | 9.12   | 31363.41 | 766.39  | 2.80  | 96.34 | 49.99 | 48.11 | 1.34 | 1.45  | 100.00 | 9.40  | 1.61  | 99.50  | 100.00   | -        | 86182.56 |
|           | 1998  | 78.53 | 69.35 | 9.18   | 29641.23 | 712.30  | 3.10  | 95.60 | 44.35 | 53.60 | 1.66 | 1.44  | 100.00 | 9.68  | 1.48  | 99.60  | 100.00   | -        | 86180.31 |
|           | 1999  | 78.93 | 69.69 | 9.24   | 31197.61 | 635.50  | 2.82  | 95.35 | 45.28 | 52.51 | 1.48 | 1.34  | 100.00 | 9.98  | 1.47  | 99.60  | 100.00   | -        | 86158.72 |
|           | 2000  | 79.38 | 70.08 | 9.30   | 33390.06 | 661.80  | 2.71  | 95.73 | 52.64 | 45.01 | 1.22 | 1.49  | 100.00 | 10.32 | 1.60  | 99.70  | 100.00   | -        | 86184.85 |
|           | 2001  | 79.82 | 70.43 | 9.39   | 32191.94 | 525.71  | 2.37  | 94.90 | 59.36 | 37.45 | 0.89 | 1.48  | 100.00 | 10.52 | 1.41  | 99.80  | 100.00   | 49851.52 | 86339.81 |
|           | 2002  | 80.15 | 70.72 | 9.43   | 33242.99 | 632.06  | 2.84  | 95.64 | 60.02 | 37.24 | 1.06 | 1.78  | 100.00 | 10.71 | 1.37  | 99.80  | 100.00   | -        | 86528.56 |
|           | 2003  | 80.37 | 70.94 | 9.43   | 35233.13 | 826.63  | 3.63  | 93.33 | 58.68 | 37.13 | 1.35 | 2.28  | 100.00 | 10.87 | 1.27  | 99.90  | 100.00   | 43165.65 | 86742.74 |
|           | 2004  | 80.67 | 71.22 | 9.46   | 38117.41 | 828.28  | 3.17  | 92.94 | 62.77 | 32.46 | 1.03 | 2.14  | 100.00 | 11.05 | 1.26  | 99.90  | 100.00   | 44836.63 | 87005.56 |
|           | 2005  | 80.97 | 71.51 | 9.46   | 40020.26 | 1061.10 | 3.74  | 94.72 | 69.32 | 26.81 | 1.00 | 2.74  | 100.00 | 11.33 | 1.26  | 100.00 | 100.00   | 47597.81 | 87179.63 |
|           | 2006  | 81.16 | 71.68 | 9.48   | 42223.89 | 1170.89 | 3.66  | 94.89 | 68.90 | 27.38 | 1.00 | 2.65  | 100.00 | 11.64 | 1.28  | 100.00 | 100.00   | 48418.80 | 87305.97 |
|           | 2007  | 81.64 | 72.00 | 9.64   | 44191.24 | 1315.15 | 3.46  | 94.35 | 27.63 | 27.63 | 0.96 | 2.50  | 100.00 | 11.89 | 1.29  | 100.00 | 100.00   | 49828.82 | 87364.61 |
|           | 2008  | 82.11 | 72.36 | 9.75   | 42650.10 | 1550.51 | 3.91  | 94.50 | 65.49 | 30.69 | 1.20 | 2.71  | 100.00 | 12.04 | 1.28  | 100.00 | 100.00   | 50059.95 | 87491.69 |
|           | 2009  | 82.44 | 72.61 | 9.83   | 41133.30 | 1655.89 | 4.27  | 94.13 | 60.50 | 35.73 | 1.53 | 2.75  | 100.00 | 12.13 | 1.22  | 100.00 | 100.00   | 49828.22 | 87620.85 |
|           | 2010  | 82.76 | 72.90 | 9.86   | 46569.68 | 1841.59 | 3.96  | 93.56 | 61.13 | 34.66 | 1.37 | 2.58  | 100.00 | 12.25 | 1.15  | 100.00 | 100.00   | 52732.00 | 87752.20 |
|           | 2011  | 82.97 | 73.02 | 9.95   | 48447.68 | 2086.14 | 3.93  | 93.25 | 61.32 | 34.24 | 1.35 | 2.59  | 100.00 | 12.79 | 1.20  | 100.00 | 100.00   | 54413.55 | 87978.10 |
|           | 2012  | 83.22 | 73.20 | 10.02  | 49103.71 | 2310.36 | 4.22  | 93.25 | 60.10 | 35.55 | 1.50 | 2.72  | 100.00 | 13.47 | 1.29  | 100.00 | 100.00   | 55910.28 | 88115.32 |
|           | 2013  | 83.30 | 73.26 | 10.04  | 50731.30 | 2531.50 | 4.53  | 93.95 | 57.93 | 38.35 | 1.74 | 2.79  | 100.00 | 14.26 | 1.19  | 100.00 | 100.00   | -        | 88282.24 |
|           | 2014  | 83.45 | 73.37 | 10.08  | 51865.72 | 2752.32 | 4.92  | 94.11 | 54.83 | 41.74 | 2.05 | 2.87  | 100.00 | 15.13 | 1.25  | 100.00 | 100.00   | -        | 88458.68 |
|           | 2015  | 83.65 | 73.52 | 10.13  | 52244.59 | -       | -     | -     | -     | -     | -    | -     | 100.00 | 16.05 | 1.24  | 100.00 | 100.00   | -        | 88627.89 |

|          |      |       |       |       |          |         |      |        |       |       |      |      |        |       |      |       |        |          |          |
|----------|------|-------|-------|-------|----------|---------|------|--------|-------|-------|------|------|--------|-------|------|-------|--------|----------|----------|
|          | 2016 | 83.73 | 73.62 | 10.11 | 52600.64 | -       | -    | -      | -     | -     | -    | -    | 100.00 | 16.96 | -    | -     | -      | -        | 88839.75 |
|          | 2017 | 84.79 | 74.22 | 10.57 | -        | -       | -    | -      | -     | -     | -    | -    | -      | -     | -    | -     | -      | -        | -        |
| Slovak   | 1995 | 72.36 | 63.19 | 9.17  | 8698.87  | 221.76  | 6.06 | 100.00 | 11.48 | 88.52 | 5.37 | 0.70 | 56.54  | 16.13 | 1.52 | 98.90 | 99.80  | 53824.71 | 91114.74 |
|          | 1996 | 72.71 | 63.47 | 9.25  | 9267.03  | 253.75  | 6.44 | 100.00 | 11.32 | 88.68 | 5.71 | 0.73 | 56.48  | 16.25 | 1.47 | 98.90 | 99.80  | 54863.26 | 91211.38 |
|          | 1997 | 72.74 | 63.51 | 9.24  | 9811.18  | 230.05  | 5.78 | 100.00 | 8.32  | 91.68 | 5.30 | 0.48 | 56.42  | 16.34 | 1.43 | 98.90 | 99.80  | 54885.14 | 91294.93 |
|          | 1998 | 72.76 | 63.53 | 9.23  | 10191.11 | 234.92  | 5.66 | 100.00 | 8.41  | 91.59 | 5.18 | 0.48 | 56.36  | 16.41 | 1.37 | 98.90 | 99.80  | 53026.07 | 91381.84 |
|          | 1999 | 73.00 | 63.72 | 9.28  | 10159.83 | 218.43  | 5.75 | 100.00 | 10.36 | 89.64 | 5.16 | 0.60 | 56.29  | 16.42 | 1.33 | 98.90 | 99.80  | 52301.81 | 91456.72 |
|          | 2000 | 73.25 | 63.94 | 9.31  | 10296.71 | 207.84  | 5.50 | 100.00 | 10.61 | 89.39 | 4.92 | 0.58 | 56.23  | 16.37 | 1.30 | 98.90 | 99.80  | 50421.40 | 91568.00 |
|          | 2001 | 73.56 | 64.19 | 9.37  | 10657.69 | 216.06  | 5.50 | 100.00 | 10.71 | 89.29 | 4.91 | 0.59 | 56.16  | 16.39 | 1.20 | 98.90 | 99.80  | 50059.68 | 91644.08 |
|          | 2002 | 73.79 | 64.37 | 9.42  | 11143.76 | 256.06  | 5.63 | 100.00 | 10.94 | 89.06 | 5.01 | 0.62 | 56.01  | 16.37 | 1.19 | 98.90 | 99.90  | 49587.28 | 91716.10 |
|          | 2003 | 73.92 | 64.48 | 9.44  | 11755.35 | 360.23  | 5.82 | 100.00 | 11.68 | 88.32 | 5.14 | 0.68 | 55.86  | 16.32 | 1.20 | 98.90 | 99.90  | 49336.11 | 91771.74 |
|          | 2004 | 74.16 | 64.68 | 9.48  | 12376.06 | 566.27  | 7.21 | 73.15  | 19.18 | 73.77 | 5.32 | 1.89 | 55.71  | 16.28 | 1.25 | 98.90 | 99.90  | 48357.39 | 91824.91 |
|          | 2005 | 74.23 | 64.77 | 9.46  | 13210.27 | 628.10  | 7.04 | 88.15  | 22.57 | 74.40 | 5.24 | 1.80 | 55.56  | 16.27 | 1.27 | 98.90 | 99.90  | 48958.79 | 91879.02 |
|          | 2006 | 74.42 | 64.93 | 9.50  | 14326.26 | 763.16  | 7.35 | 81.92  | 25.95 | 68.32 | 5.02 | 2.33 | 55.41  | 16.40 | 1.25 | 98.80 | 99.90  | 48387.52 | 91874.15 |
|          | 2007 | 74.56 | 64.98 | 9.58  | 15868.80 | 1082.05 | 7.76 | 79.10  | 66.85 | 66.85 | 5.18 | 2.57 | 55.26  | 16.56 | 1.27 | 98.80 | 99.90  | 48141.60 | 91874.50 |
|          | 2008 | 74.89 | 65.21 | 9.68  | 16747.81 | 1406.45 | 8.02 | 78.29  | 25.24 | 67.76 | 5.44 | 2.59 | 55.11  | 16.75 | 1.34 | 98.80 | 100.00 | 49160.99 | 91867.02 |
|          | 2009 | 75.15 | 65.40 | 9.75  | 15818.56 | 1483.39 | 9.15 | 74.48  | 25.55 | 65.69 | 6.01 | 3.14 | 54.96  | 16.97 | 1.44 | 98.80 | 100.00 | 46722.86 | 91833.81 |
|          | 2010 | 75.56 | 65.76 | 9.80  | 16600.61 | 1377.73 | 8.51 | 67.98  | 21.66 | 68.13 | 5.80 | 2.71 | 54.69  | 17.24 | 1.43 | 98.80 | 100.00 | 49973.28 | 91814.73 |
|          | 2011 | 75.91 | 65.98 | 9.94  | 17046.61 | 1414.97 | 7.96 | 77.91  | 22.65 | 70.93 | 5.64 | 2.31 | 54.41  | 17.66 | 1.45 | 98.80 | 100.00 | 48551.75 | 91789.18 |
|          | 2012 | 76.23 | 66.22 | 10.00 | 17299.63 | 1376.86 | 8.15 | 73.88  | 22.37 | 69.72 | 5.68 | 2.47 | 54.16  | 18.11 | 1.34 | 98.80 | 100.00 | 46301.27 | 91803.42 |
|          | 2013 | 76.53 | 66.46 | 10.07 | 17538.65 | 1417.02 | 8.00 | 81.96  | 22.69 | 72.31 | 5.79 | 2.22 | 53.95  | 18.61 | 1.34 | 98.80 | 100.00 | -        | 91822.84 |
|          | 2014 | 76.80 | 66.67 | 10.14 | 18003.54 | 1454.81 | 8.05 | 81.96  | 22.54 | 72.51 | 5.84 | 2.21 | 53.76  | 19.20 | 1.37 | 98.80 | 100.00 | -        | 91848.38 |
|          | 2015 | 76.90 | 66.75 | 10.15 | 18678.93 | -       | -    | -      | -     | -     | -    | -    | 53.60  | 19.89 | 1.37 | 98.80 | 100.00 | -        | 91901.76 |
|          | 2016 | 76.97 | 66.88 | 10.09 | 19282.52 | -       | -    | -      | -     | -     | -    | -    | 53.47  | 20.74 | -    | -     | -      | -        | 91978.56 |
|          | 2017 | 77.41 | 66.33 | 11.08 | -        | -       | -    | -      | -     | -     | -    | -    | -      | -     | -    | -     | -      | -        | -        |
| Slovenia | 1995 | 74.57 | 64.62 | 9.95  | 15062.82 | 784.95  | 7.46 | 50.30  | 11.22 | 77.70 | 5.79 | 1.66 | 50.62  | 17.69 | 1.29 | 99.10 | 99.60  | 18869.70 | 91385.95 |
|          | 1996 | 74.88 | 64.86 | 10.02 | 15602.22 | 811.82  | 7.64 | 49.50  | 11.79 | 76.18 | 5.82 | 1.82 | 50.64  | 18.21 | 1.28 | 99.10 | 99.60  | 20088.20 | 91498.63 |
|          | 1997 | 75.09 | 65.03 | 10.06 | 16422.25 | 797.51  | 7.76 | 46.75  | 11.67 | 75.03 | 5.82 | 1.94 | 50.67  | 18.74 | 1.25 | 99.10 | 99.60  | 21798.46 | 91623.42 |
|          | 1998 | 75.32 | 65.20 | 10.11 | 16998.86 | 856.07  | 7.81 | 48.39  | 11.85 | 75.52 | 5.90 | 1.91 | 50.70  | 19.25 | 1.23 | 99.10 | 99.60  | 21456.26 | 91751.40 |

|      |       |       |       |          |         |      |       |       |       |      |      |       |       |      |       |       |          |          |
|------|-------|-------|-------|----------|---------|------|-------|-------|-------|------|------|-------|-------|------|-------|-------|----------|----------|
| 1999 | 75.61 | 65.43 | 10.18 | 17882.66 | 879.65  | 7.80 | 50.83 | 12.37 | 75.66 | 5.90 | 1.90 | 50.73 | 19.71 | 1.21 | 99.10 | 99.60 | 21132.26 | 91869.48 |
| 2000 | 76.03 | 65.75 | 10.27 | 18570.70 | 831.07  | 8.26 | 44.10 | 11.46 | 74.01 | 6.12 | 2.15 | 50.75 | 20.12 | 1.26 | 99.10 | 99.60 | 20927.09 | 91999.48 |
| 2001 | 76.26 | 65.88 | 10.38 | 19088.33 | 882.70  | 8.57 | 39.18 | 10.46 | 73.29 | 6.28 | 2.29 | 50.78 | 20.55 | 1.21 | 99.10 | 99.60 | 21694.41 | 92042.08 |
| 2002 | 76.60 | 66.11 | 10.48 | 19796.07 | 1000.17 | 8.62 | 43.20 | 11.50 | 73.37 | 6.32 | 2.30 | 50.78 | 20.93 | 1.21 | 99.10 | 99.60 | 22342.26 | 92102.01 |
| 2003 | 76.78 | 66.23 | 10.55 | 20346.42 | 1281.13 | 8.77 | 41.85 | 11.71 | 72.02 | 6.31 | 2.45 | 50.69 | 21.28 | 1.20 | 99.10 | 99.60 | 21936.49 | 92154.90 |
| 2004 | 77.18 | 66.49 | 10.69 | 21218.25 | 1435.09 | 8.47 | 43.76 | 11.60 | 73.50 | 6.22 | 2.24 | 50.59 | 21.62 | 1.25 | 99.10 | 99.60 | 22064.48 | 92201.29 |
| 2005 | 77.57 | 66.79 | 10.79 | 22029.43 | 1519.55 | 8.50 | 46.22 | 12.42 | 73.13 | 6.21 | 2.28 | 50.50 | 21.98 | 1.26 | 99.10 | 99.60 | 22366.88 | 92267.19 |
| 2006 | 77.93 | 67.05 | 10.89 | 23201.26 | 1636.73 | 8.42 | 42.40 | 11.56 | 72.73 | 6.12 | 2.30 | 50.41 | 22.39 | 1.31 | 99.10 | 99.60 | 22781.65 | 92246.08 |
| 2007 | 78.29 | 67.26 | 11.02 | 24673.44 | 1880.51 | 7.98 | 46.99 | 72.33 | 72.33 | 5.77 | 2.21 | 50.32 | 22.82 | 1.38 | 99.10 | 99.60 | 22932.54 | 92191.96 |
| 2008 | 78.78 | 67.63 | 11.15 | 25447.43 | 2297.77 | 8.47 | 46.50 | 11.94 | 74.32 | 6.29 | 2.17 | 50.22 | 23.25 | 1.53 | 99.10 | 99.60 | 23252.26 | 92138.96 |
| 2009 | 79.13 | 67.88 | 11.25 | 23252.10 | 2271.08 | 9.38 | 45.53 | 11.91 | 73.83 | 6.92 | 2.45 | 50.13 | 23.67 | 1.53 | 99.10 | 99.60 | 21453.16 | 92098.16 |
| 2010 | 79.50 | 68.19 | 11.31 | 23437.47 | 2083.06 | 9.07 | 47.41 | 12.23 | 74.20 | 6.73 | 2.34 | 50.04 | 24.07 | 1.57 | 99.10 | 99.50 | 21893.66 | 92090.17 |
| 2011 | 79.86 | 68.44 | 11.42 | 23540.71 | 2225.15 | 9.08 | 44.41 | 11.76 | 73.52 | 6.67 | 2.40 | 49.95 | 24.53 | 1.56 | 99.10 | 99.50 | 21513.48 | 92053.26 |
| 2012 | 80.05 | 68.61 | 11.44 | 22864.21 | 2068.52 | 9.37 | 43.48 | 11.90 | 72.63 | 6.80 | 2.56 | 49.86 | 24.96 | 1.58 | 99.10 | 99.50 | 21074.75 | 92061.51 |
| 2013 | 80.30 | 68.81 | 11.49 | 22574.71 | 2114.88 | 9.29 | 42.86 | 12.11 | 71.76 | 6.67 | 2.62 | 49.76 | 25.43 | 1.55 | 99.10 | 99.50 | -        | 92083.19 |
| 2014 | 80.79 | 69.19 | 11.60 | 23224.40 | 2160.75 | 9.23 | 42.69 | 12.07 | 71.73 | 6.62 | 2.61 | 49.70 | 26.03 | 1.58 | 99.10 | 99.50 | -        | 92101.57 |
| 2015 | 80.73 | 69.17 | 11.56 | 23731.17 | -       | -    | -     | -     | -     | -    | -    | 49.65 | 26.82 | 1.58 | 99.10 | 99.50 | -        | 92131.90 |
| 2016 | 80.84 | 69.32 | 11.51 | 24462.73 | -       | -    | -     | -     | -     | -    | -    | 49.63 | 27.77 | -    | -     | -     | -        | 92177.32 |
| 2017 | 81.10 | 68.74 | 12.36 | -        | -       | -    | -     | -     | -     | -    | -    | -     | -     | -    | -     | -     | -        | -        |

|         |      |       |       |      |         |       |      |       |      |       |      |      |       |      |      |       |       |         |          |
|---------|------|-------|-------|------|---------|-------|------|-------|------|-------|------|------|-------|------|------|-------|-------|---------|----------|
| Solomon | 1995 | 60.94 | 53.66 | 7.29 | 1630.24 | 46.94 | 3.25 | 55.88 | 4.02 | 92.81 | 3.01 | 0.23 | 14.66 | 4.95 | 5.20 | -     | -     | 3885.28 | 86227.23 |
| Islands | 1996 | 61.13 | 53.81 | 7.32 | 1610.48 | 46.19 | 3.02 | 55.88 | 4.35 | 92.21 | 2.78 | 0.24 | 14.87 | 4.98 | 5.08 | -     | -     | 4053.19 | 86198.99 |
|         | 1997 | 61.27 | 53.92 | 7.35 | 1543.52 | 49.09 | 3.28 | 55.88 | 4.02 | 92.80 | 3.05 | 0.24 | 15.08 | 5.03 | 4.97 | -     | -     | 4059.36 | 86181.15 |
|         | 1998 | 61.38 | 54.01 | 7.37 | 1528.04 | 42.57 | 3.53 | 55.88 | 3.98 | 92.88 | 3.28 | 0.25 | 15.29 | 5.08 | 4.87 | -     | -     | 3887.43 | 86170.80 |
|         | 1999 | 61.45 | 54.06 | 7.39 | 1479.40 | 45.72 | 3.80 | 55.88 | 3.82 | 93.17 | 3.54 | 0.26 | 15.50 | 5.11 | 4.79 | -     | -     | 3784.05 | 86171.83 |
|         | 2000 | 61.40 | 54.02 | 7.39 | 1234.30 | 48.12 | 4.56 | 56.70 | 3.24 | 94.28 | 4.30 | 0.26 | 15.81 | 5.11 | 4.72 | 25.50 | 79.70 | 4086.06 | 86193.46 |
|         | 2001 | 61.30 | 53.91 | 7.38 | 1105.69 | 60.92 | 6.44 | 56.70 | 2.47 | 95.64 | 6.16 | 0.28 | 16.20 | 5.18 | 4.67 | 25.70 | 79.80 | 4147.14 | 86266.17 |
|         | 2002 | 61.16 | 53.79 | 7.37 | 1046.56 | 47.85 | 6.09 | 56.70 | 2.51 | 95.58 | 5.82 | 0.27 | 16.60 | 5.23 | 4.62 | 26.00 | 79.80 | 4329.77 | 86344.26 |
|         | 2003 | 61.06 | 53.70 | 7.36 | 1085.88 | 44.76 | 6.00 | 56.70 | 4.40 | 92.24 | 5.54 | 0.47 | 17.00 | 5.26 | 4.58 | 26.20 | 79.90 | 4401.76 | 86452.82 |
|         | 2004 | 61.00 | 53.63 | 7.37 | 1110.35 | 46.21 | 5.64 | 56.70 | 4.62 | 91.85 | 5.18 | 0.46 | 17.41 | 5.31 | 4.54 | 26.50 | 80.00 | 4422.74 | 86551.81 |

|         |       |       |       |         |        |      |       |       |       |      |      |       |      |      |       |       |          |          |
|---------|-------|-------|-------|---------|--------|------|-------|-------|-------|------|------|-------|------|------|-------|-------|----------|----------|
| 2005    | 61.00 | 53.61 | 7.39  | 1141.74 | 69.10  | 7.83 | 56.70 | 3.36  | 94.08 | 7.37 | 0.46 | 17.83 | 5.37 | 4.50 | 26.80 | 80.00 | 4323.80  | 86678.19 |
| 2006    | 61.07 | 53.70 | 7.37  | 1191.80 | 63.31  | 6.66 | 56.70 | 3.90  | 93.12 | 6.21 | 0.46 | 18.26 | 5.48 | 4.46 | 27.10 | 80.10 | 4336.37  | 86751.94 |
| 2007    | 60.97 | 53.62 | 7.35  | 1249.15 | 67.35  | 6.42 | 56.70 | 92.72 | 92.72 | 5.95 | 0.47 | 18.69 | 5.60 | 4.41 | 27.40 | 80.20 | 4406.11  | 86822.51 |
| 2008    | 61.36 | 53.95 | 7.41  | 1307.18 | 72.15  | 5.97 | 56.70 | 4.26  | 92.49 | 5.52 | 0.45 | 19.14 | 5.72 | 4.36 | 27.70 | 80.30 | 4411.73  | 86903.67 |
| 2009    | 61.40 | 53.98 | 7.42  | 1217.38 | 91.99  | 7.92 | 56.70 | 3.35  | 94.09 | 7.45 | 0.47 | 19.59 | 5.83 | 4.30 | 28.00 | 80.30 | 4419.52  | 86993.75 |
| 2010    | 61.68 | 54.21 | 7.47  | 1272.45 | 95.32  | 7.47 | 56.70 | 3.38  | 94.04 | 7.02 | 0.44 | 20.05 | 5.92 | 4.24 | 28.30 | 80.40 | 4479.83  | 87087.08 |
| 2011    | 61.92 | 54.41 | 7.52  | 1405.47 | 83.81  | 5.08 | 56.70 | 4.32  | 92.39 | 4.70 | 0.39 | 20.51 | 5.97 | 4.17 | 28.60 | 80.50 | 4536.58  | 87187.18 |
| 2012    | 62.16 | 54.60 | 7.56  | 1439.19 | 102.30 | 5.48 | 56.70 | 3.99  | 92.96 | 5.09 | 0.39 | 20.96 | 6.01 | 4.10 | 28.90 | 80.50 | 4591.46  | 87309.90 |
| 2013    | 62.35 | 54.75 | 7.60  | 1451.05 | 102.47 | 5.42 | 56.70 | 4.51  | 92.05 | 4.99 | 0.43 | 21.42 | 6.03 | 4.03 | 29.20 | 80.60 | -        | 87448.11 |
| 2014    | 62.39 | 54.77 | 7.62  | 1442.23 | 102.24 | 5.05 | 56.70 | 4.61  | 91.87 | 4.64 | 0.41 | 21.88 | 6.04 | 3.97 | 29.50 | 80.70 | -        | 87609.49 |
| 2015    | 62.77 | 55.08 | 7.69  | 1465.59 | -      | -    | -     | -     | -     | -    | -    | 22.33 | 6.04 | 3.91 | 29.80 | 80.80 | -        | 87776.83 |
| 2016    | 63.04 | 55.30 | 7.74  | 1479.34 | -      | -    | -     | -     | -     | -    | -    | 22.78 | 6.07 | -    | -     | -     | -        | 87943.20 |
| 2017    | 65.73 | 57.15 | 8.58  | -       | -      | -    | -     | -     | -     | -    | -    | -     | -    | -    | -     | -     | -        | -        |
| Somalia | 1995  | 51.34 | 45.22 | 6.12    | -      | -    | -     | -     | -     | -    | -    | 31.43 | 5.37 | 7.65 | 21.40 | 21.00 | 18762.63 | 89444.04 |
|         | 1996  | 51.21 | 45.12 | 6.09    | -      | -    | -     | -     | -     | -    | -    | 31.79 | 5.37 | 7.68 | 21.50 | 21.00 | 19206.20 | 89487.16 |
|         | 1997  | 50.89 | 44.85 | 6.04    | -      | -    | -     | -     | -     | -    | -    | 32.15 | 5.35 | 7.69 | 21.60 | 21.10 | 19652.85 | 89554.37 |
|         | 1998  | 51.60 | 45.45 | 6.15    | -      | -    | -     | -     | -     | -    | -    | 32.51 | 5.32 | 7.68 | 21.70 | 21.80 | 20919.89 | 89621.11 |
|         | 1999  | 51.75 | 45.56 | 6.19    | -      | -    | -     | -     | -     | -    | -    | 32.88 | 5.29 | 7.66 | 21.80 | 22.60 | 21185.95 | 89681.73 |
|         | 2000  | 51.99 | 45.75 | 6.24    | -      | -    | -     | -     | -     | -    | -    | 33.25 | 5.27 | 7.62 | 21.80 | 23.50 | 20491.62 | 89741.19 |
|         | 2001  | 52.39 | 46.13 | 6.26    | -      | -    | -     | -     | -     | -    | -    | 33.62 | 5.30 | 7.57 | 21.90 | 24.40 | 20649.51 | 89714.82 |
|         | 2002  | 52.66 | 46.39 | 6.27    | -      | -    | -     | -     | -     | -    | -    | 33.99 | 5.33 | 7.51 | 22.00 | 25.30 | 20911.00 | 89702.51 |
|         | 2003  | 53.07 | 46.77 | 6.30    | -      | -    | -     | -     | -     | -    | -    | 34.37 | 5.35 | 7.45 | 22.10 | 26.30 | 21516.58 | 89680.99 |
|         | 2004  | 53.32 | 47.02 | 6.30    | -      | -    | -     | -     | -     | -    | -    | 34.76 | 5.36 | 7.38 | 22.30 | 27.30 | 21192.85 | 89673.91 |
|         | 2005  | 53.83 | 47.45 | 6.38    | -      | -    | -     | -     | -     | -    | -    | 35.16 | 5.35 | 7.31 | 22.40 | 28.40 | 21219.93 | 89672.85 |
|         | 2006  | 53.98 | 47.59 | 6.39    | -      | -    | -     | -     | -     | -    | -    | 35.56 | 5.37 | 7.23 | 22.60 | 29.50 | 21176.81 | 89651.23 |
|         | 2007  | 54.08 | 47.66 | 6.42    | -      | -    | -     | -     | -     | -    | -    | 35.97 | 5.37 | 7.14 | 22.70 | 30.70 | 21272.60 | 89630.02 |
|         | 2008  | 54.70 | 48.19 | 6.51    | -      | -    | -     | -     | -     | -    | -    | 36.39 | 5.35 | 7.06 | 22.90 | 30.90 | 21450.95 | 89625.91 |
|         | 2009  | 54.96 | 48.39 | 6.57    | -      | -    | -     | -     | -     | -    | -    | 36.82 | 5.33 | 6.96 | 23.10 | 31.20 | 21130.62 | 89634.16 |
|         | 2010  | 53.08 | 46.74 | 6.34    | -      | -    | -     | -     | -     | -    | -    | 37.26 | 5.30 | 6.87 | 23.30 | 31.40 | 21461.81 | 89673.13 |

|              |      |       |       |      |         |        |      |       |       |       |      |      |       |      |      |       |       |           |          |
|--------------|------|-------|-------|------|---------|--------|------|-------|-------|-------|------|------|-------|------|------|-------|-------|-----------|----------|
|              | 2011 | 53.35 | 47.00 | 6.35 | -       | -      | -    | -     | -     | -     | -    | -    | 37.70 | 5.32 | 6.77 | 23.50 | 31.70 | 21690.27  | 89600.76 |
|              | 2012 | 55.79 | 49.15 | 6.64 | -       | -      | -    | -     | -     | -     | -    | -    | 38.15 | 5.33 | 6.67 | -     | -     | 21916.32  | 89536.70 |
|              | 2013 | 56.55 | 49.82 | 6.73 | -       | -      | -    | -     | -     | -     | -    | -    | 38.61 | 5.33 | 6.56 | -     | -     | -         | 89476.81 |
|              | 2014 | 56.88 | 50.13 | 6.75 | -       | -      | -    | -     | -     | -     | -    | -    | 39.08 | 5.32 | 6.46 | -     | -     | -         | 89418.62 |
|              | 2015 | 57.19 | 50.41 | 6.78 | -       | -      | -    | -     | -     | -     | -    | -    | 39.55 | 5.31 | 6.37 | -     | -     | -         | 89361.67 |
|              | 2016 | 57.13 | 50.39 | 6.75 | -       | -      | -    | -     | -     | -     | -    | -    | 40.03 | 5.34 | -    | -     | -     | -         | 89307.63 |
|              | 2017 | 58.52 | 51.20 | 7.32 | -       | -      | -    | -     | -     | -     | -    | -    | -     | -    | -    | -     | -     | -         | -        |
| South Africa | 1995 | 64.15 | 55.55 | 8.61 | 5616.42 | 310.86 | 8.28 | 29.88 | 17.52 | 41.38 | 3.43 | 4.86 | 54.49 | 6.22 | 3.11 | 53.80 | 84.00 | 371350.21 | 88140.20 |
|              | 1996 | 62.82 | 54.48 | 8.34 | 5749.58 | 296.25 | 8.47 | 29.23 | 15.98 | 45.33 | 3.84 | 4.63 | 54.97 | 6.30 | 3.04 | 54.50 | 84.50 | 383673.27 | 88236.81 |
|              | 1997 | 60.88 | 52.92 | 7.97 | 5803.96 | 305.34 | 8.59 | 26.54 | 14.94 | 43.72 | 3.75 | 4.83 | 55.45 | 6.35 | 2.97 | 55.10 | 85.00 | 403030.55 | 88343.02 |
|              | 1998 | 59.34 | 51.61 | 7.73 | 5745.30 | 268.23 | 8.49 | 25.38 | 14.66 | 42.24 | 3.58 | 4.90 | 55.93 | 6.40 | 2.92 | 55.80 | 85.50 | 457895.90 | 88444.47 |
|              | 1999 | 57.55 | 50.07 | 7.48 | 5794.41 | 262.73 | 8.51 | 23.42 | 14.01 | 40.19 | 3.42 | 5.09 | 56.41 | 6.43 | 2.87 | 56.50 | 86.00 | 430853.84 | 88542.36 |
|              | 2000 | 55.40 | 48.13 | 7.27 | 5946.00 | 245.06 | 8.07 | 23.10 | 13.68 | 40.79 | 3.29 | 4.78 | 56.89 | 6.45 | 2.83 | 57.20 | 86.50 | 420482.75 | 88641.33 |
|              | 2001 | 54.32 | 47.25 | 7.07 | 6052.56 | 221.67 | 8.31 | 21.03 | 12.61 | 40.06 | 3.33 | 4.98 | 57.37 | 6.54 | 2.79 | 57.80 | 87.00 | 416031.24 | 88695.31 |
|              | 2002 | 53.14 | 46.27 | 6.87 | 6200.32 | 201.80 | 8.09 | 19.49 | 11.70 | 39.97 | 3.23 | 4.85 | 57.90 | 6.61 | 2.76 | 58.50 | 87.40 | 434071.08 | 88737.39 |
|              | 2003 | 52.14 | 45.44 | 6.71 | 6305.79 | 308.09 | 8.26 | 18.54 | 11.04 | 40.42 | 3.34 | 4.92 | 58.45 | 6.67 | 2.73 | 59.20 | 87.90 | 456334.13 | 88779.40 |
|              | 2004 | 51.48 | 44.86 | 6.62 | 6511.14 | 380.13 | 7.93 | 18.26 | 10.84 | 40.60 | 3.22 | 4.71 | 58.99 | 6.73 | 2.70 | 59.80 | 88.40 | 472713.79 | 88819.93 |
|              | 2005 | 51.13 | 44.47 | 6.65 | 6767.63 | 414.15 | 7.77 | 18.26 | 10.47 | 42.68 | 3.32 | 4.45 | 59.54 | 6.78 | 2.68 | 60.40 | 88.90 | 498312.89 | 88874.72 |
|              | 2006 | 51.05 | 44.46 | 6.59 | 7053.94 | 419.29 | 7.57 | 18.08 | 10.05 | 44.41 | 3.36 | 4.21 | 60.08 | 6.89 | 2.66 | 61.10 | 89.40 | 480054.73 | 88887.95 |
|              | 2007 | 51.50 | 44.86 | 6.65 | 7333.24 | 453.89 | 7.53 | 16.85 | 45.11 | 45.11 | 3.40 | 4.13 | 60.62 | 6.99 | 2.64 | 61.70 | 89.80 | 502130.26 | 88905.41 |
|              | 2008 | 52.21 | 45.45 | 6.76 | 7464.37 | 441.24 | 7.75 | 15.69 | 8.41  | 46.41 | 3.60 | 4.15 | 61.15 | 7.09 | 2.62 | 62.30 | 90.30 | -         | 88929.73 |
|              | 2009 | 53.14 | 46.21 | 6.93 | 7247.45 | 486.71 | 8.39 | 14.55 | 7.70  | 47.07 | 3.95 | 4.44 | 61.69 | 7.16 | 2.60 | 62.90 | 90.70 | -         | 88967.00 |
|              | 2010 | 54.35 | 47.15 | 7.19 | 7361.76 | 618.35 | 8.50 | 13.84 | 7.35  | 46.92 | 3.99 | 4.51 | 62.22 | 7.22 | 2.59 | 63.50 | 91.10 | -         | 89012.30 |
|              | 2011 | 55.83 | 48.43 | 7.40 | 7493.30 | 686.94 | 8.61 | 13.43 | 6.99  | 47.99 | 4.13 | 4.48 | 62.75 | 7.32 | 2.57 | 64.10 | 91.60 | -         | 89051.31 |
|              | 2012 | 57.57 | 49.88 | 7.68 | 7545.78 | 661.43 | 8.79 | 13.09 | 6.72  | 48.62 | 4.28 | 4.52 | 63.27 | 7.41 | 2.55 | 64.70 | 92.00 | -         | 89096.61 |
|              | 2013 | 59.31 | 51.31 | 7.99 | 7616.78 | 601.37 | 8.78 | 12.66 | 6.59  | 47.92 | 4.20 | 4.57 | 63.79 | 7.50 | 2.53 | 65.30 | 92.40 | -         | 89134.24 |
|              | 2014 | 60.69 | 52.44 | 8.25 | 7626.81 | 570.21 | 8.80 | 12.54 | 6.49  | 48.24 | 4.24 | 4.55 | 64.30 | 7.61 | 2.51 | 65.80 | 92.80 | -         | 89163.14 |
|              | 2015 | 61.83 | 53.35 | 8.48 | 7604.36 | -      | -    | -     | -     | -     | -    | -    | 64.80 | 7.75 | 2.49 | 66.40 | 93.20 | -         | 89181.79 |
|              | 2016 | 62.44 | 53.83 | 8.61 | 7503.27 | -      | -    | -     | -     | -     | -    | -    | 65.30 | 7.94 | -    | -     | -     | -         | 89183.53 |

|             |      |       |       |      |          |         |      |       |       |       |      |      |       |       |      |       |       |           |          |
|-------------|------|-------|-------|------|----------|---------|------|-------|-------|-------|------|------|-------|-------|------|-------|-------|-----------|----------|
|             | 2017 | 66.31 | 57.05 | 9.26 | -        | -       | -    | -     | -     | -     | -    | -    | -     | -     | -    | -     | -     | -         | -        |
| South Sudan | 1995 | 53.34 | 45.08 | 8.26 | -        | -       | -    | -     | -     | -     | -    | -    | 15.87 | 5.45  | 6.55 | -     | -     | -         | 88452.12 |
|             | 1996 | 53.11 | 44.97 | 8.14 | -        | -       | -    | -     | -     | -     | -    | -    | 16.00 | 5.52  | 6.50 | -     | -     | -         | 88488.84 |
|             | 1997 | 53.08 | 45.03 | 8.05 | -        | -       | -    | -     | -     | -     | -    | -    | 16.12 | 5.60  | 6.44 | -     | -     | -         | 88528.84 |
|             | 1998 | 53.30 | 45.24 | 8.06 | -        | -       | -    | -     | -     | -     | -    | -    | 16.25 | 5.67  | 6.38 | -     | -     | -         | 88565.19 |
|             | 1999 | 54.57 | 46.37 | 8.20 | -        | -       | -    | -     | -     | -     | -    | -    | 16.38 | 5.74  | 6.30 | -     | -     | -         | 88581.75 |
|             | 2000 | 54.50 | 46.36 | 8.14 | -        | -       | -    | -     | -     | -     | -    | -    | 16.50 | 5.80  | 6.22 | -     | -     | -         | 88589.29 |
|             | 2001 | 54.62 | 46.56 | 8.06 | -        | -       | -    | -     | -     | -     | -    | -    | 16.63 | 5.87  | 6.14 | -     | -     | -         | 88566.21 |
|             | 2002 | 54.97 | 46.90 | 8.07 | -        | -       | -    | -     | -     | -     | -    | -    | 16.76 | 5.93  | 6.05 | -     | -     | -         | 88554.73 |
|             | 2003 | 56.01 | 47.81 | 8.20 | -        | -       | -    | -     | -     | -     | -    | -    | 16.89 | 5.98  | 5.97 | -     | -     | -         | 88553.51 |
|             | 2004 | 56.02 | 47.06 | 8.96 | -        | -       | -    | -     | -     | -     | -    | -    | 17.02 | 6.03  | 5.89 | -     | -     | -         | 88557.36 |
|             | 2005 | 56.59 | 47.56 | 9.03 | -        | -       | -    | -     | -     | -     | -    | -    | 17.15 | 6.08  | 5.80 | -     | -     | -         | 88573.25 |
|             | 2006 | 56.76 | 48.63 | 8.12 | -        | -       | -    | -     | -     | -     | -    | -    | 17.29 | 6.13  | 5.72 | -     | -     | -         | 88543.64 |
|             | 2007 | 57.12 | 49.02 | 8.10 | -        | -       | -    | -     | -     | -     | -    | -    | 17.42 | 6.17  | 5.64 | -     | -     | -         | 88518.72 |
|             | 2008 | 57.52 | 49.43 | 8.09 | 1532.18  | -       | -    | -     | -     | -     | -    | -    | 17.56 | 6.21  | 5.55 | -     | -     | -         | 88495.84 |
|             | 2009 | 57.47 | 49.47 | 8.01 | 1541.61  | -       | -    | -     | -     | -     | -    | -    | 17.70 | 6.26  | 5.47 | -     | -     | -         | 88478.60 |
|             | 2010 | 58.12 | 50.07 | 8.05 | 1562.24  | -       | -    | -     | -     | -     | -    | -    | 17.86 | 6.31  | 5.38 | -     | -     | -         | 88467.63 |
|             | 2011 | 58.07 | 50.08 | 7.98 | 1435.33  | -       | -    | -     | -     | -     | -    | -    | 18.02 | 6.35  | 5.29 | 6.60  | 58.60 | -         | 88369.76 |
|             | 2012 | 58.40 | 50.41 | 7.98 | 747.47   | 26.19   | 2.77 | 92.80 | 62.12 | 33.06 | 0.92 | 1.86 | 18.20 | 6.38  | 5.20 | 6.60  | 58.70 | -         | 88275.42 |
|             | 2013 | 58.56 | 50.60 | 7.96 | 818.44   | 26.99   | 2.62 | 93.01 | 60.28 | 35.19 | 0.92 | 1.70 | 18.39 | 6.40  | 5.11 | 6.70  | 58.70 | -         | 88205.49 |
|             | 2014 | 58.73 | 50.78 | 7.94 | 820.11   | 30.05   | 2.74 | 92.59 | 54.15 | 41.52 | 1.14 | 1.60 | 18.59 | 6.40  | 5.02 | 6.70  | 58.70 | -         | 88118.11 |
|             | 2015 | 58.88 | 50.95 | 7.93 | 745.34   | -       | -    | -     | -     | -     | -    | -    | 18.80 | 6.37  | 4.94 | 6.70  | 58.70 | -         | 88044.89 |
|             | 2016 | 59.70 | 51.67 | 8.03 | -        | -       | -    | -     | -     | -     | -    | -    | 19.03 | 6.33  | -    | -     | -     | -         | 87957.30 |
|             | 2017 | 59.25 | 50.60 | 8.64 | -        | -       | -    | -     | -     | -     | -    | -    | -     | -     | -    | -     | -     | -         | -        |
| Spain       | 1995 | 78.15 | 68.51 | 9.63 | 23686.84 | 1129.19 | 7.44 | 84.61 | 23.54 | 72.18 | 5.37 | 2.07 | 75.86 | 22.19 | 1.16 | 99.90 | 99.90 | 319459.33 | 91483.16 |
|             | 1996 | 78.36 | 68.72 | 9.63 | 24219.33 | 1178.14 | 7.46 | 83.90 | 23.19 | 72.36 | 5.40 | 2.06 | 75.94 | 22.63 | 1.14 | 99.90 | 99.90 | 309786.21 | 91562.88 |
|             | 1997 | 78.70 | 69.04 | 9.66 | 25007.89 | 1062.57 | 7.33 | 83.89 | 23.10 | 72.47 | 5.31 | 2.02 | 76.02 | 23.10 | 1.15 | 99.90 | 99.90 | 329912.39 | 91648.64 |
|             | 1998 | 78.92 | 69.26 | 9.66 | 25977.00 | 1109.46 | 7.32 | 83.61 | 23.25 | 72.20 | 5.28 | 2.03 | 76.10 | 23.58 | 1.13 | 99.90 | 99.90 | 343785.34 | 91714.17 |
|             | 1999 | 79.11 | 69.45 | 9.66 | 27032.22 | 1135.74 | 7.32 | 83.31 | 23.30 | 72.03 | 5.27 | 2.05 | 76.18 | 24.02 | 1.17 | 99.90 | 99.90 | 363569.60 | 91747.15 |

|      |       |       |       |          |         |      |       |       |       |      |      |       |       |      |       |        |           |          |
|------|-------|-------|-------|----------|---------|------|-------|-------|-------|------|------|-------|-------|------|-------|--------|-----------|----------|
| 2000 | 79.40 | 69.68 | 9.72  | 28335.00 | 1045.48 | 7.21 | 83.08 | 23.58 | 71.62 | 5.17 | 2.05 | 76.26 | 24.37 | 1.22 | 99.90 | 99.90  | 381031.15 | 91783.75 |
| 2001 | 79.67 | 69.90 | 9.77  | 29264.88 | 1089.30 | 7.24 | 83.09 | 23.93 | 71.20 | 5.16 | 2.09 | 76.34 | 24.39 | 1.23 | 99.90 | 99.90  | 377629.97 | 91812.96 |
| 2002 | 79.83 | 70.03 | 9.79  | 29685.36 | 1212.66 | 7.25 | 82.61 | 23.72 | 71.29 | 5.17 | 2.08 | 76.53 | 24.34 | 1.25 | 99.90 | 99.90  | 397417.36 | 91834.20 |
| 2003 | 79.98 | 70.16 | 9.82  | 30082.63 | 1687.90 | 7.99 | 77.17 | 21.84 | 71.70 | 5.73 | 2.26 | 76.78 | 24.26 | 1.30 | 99.90 | 100.00 | 407869.66 | 91834.31 |
| 2004 | 80.25 | 70.38 | 9.87  | 30504.36 | 1975.38 | 8.05 | 77.50 | 21.65 | 72.06 | 5.80 | 2.25 | 77.02 | 24.21 | 1.31 | 99.90 | 100.00 | 421107.43 | 91830.86 |
| 2005 | 80.48 | 70.55 | 9.93  | 31110.01 | 2120.50 | 8.12 | 76.91 | 21.25 | 72.37 | 5.88 | 2.24 | 77.26 | 24.22 | 1.33 | 99.90 | 100.00 | 437016.74 | 91827.80 |
| 2006 | 80.83 | 70.83 | 10.00 | 31865.37 | 2312.79 | 8.23 | 75.74 | 20.49 | 72.95 | 6.01 | 2.23 | 77.50 | 24.34 | 1.36 | 99.90 | 100.00 | 430218.33 | 91819.66 |
| 2007 | 81.07 | 71.02 | 10.05 | 32459.92 | 2690.00 | 8.36 | 74.86 | 72.97 | 72.97 | 6.10 | 2.26 | 77.74 | 24.49 | 1.38 | 99.90 | 100.00 | 439904.17 | 91802.15 |
| 2008 | 81.36 | 71.25 | 10.11 | 32303.24 | 3072.17 | 8.80 | 77.98 | 20.30 | 73.97 | 6.51 | 2.29 | 77.98 | 24.69 | 1.45 | 99.90 | 100.00 | 404869.43 | 91794.29 |
| 2009 | 81.68 | 71.49 | 10.19 | 30874.13 | 2994.73 | 9.52 | 78.13 | 18.97 | 75.72 | 7.21 | 2.31 | 78.21 | 24.93 | 1.38 | 99.90 | 100.00 | 372822.52 | 91814.41 |
| 2010 | 81.97 | 71.71 | 10.26 | 30736.63 | 2846.71 | 9.56 | 81.17 | 20.24 | 75.07 | 7.17 | 2.38 | 78.44 | 25.23 | 1.37 | 99.90 | 100.00 | 354618.02 | 91871.95 |
| 2011 | 82.18 | 71.90 | 10.28 | 30321.70 | 2954.25 | 9.48 | 79.23 | 20.71 | 73.86 | 7.00 | 2.48 | 78.67 | 25.82 | 1.34 | 99.90 | 100.00 | 353857.39 | 91918.93 |
| 2012 | 82.32 | 72.04 | 10.28 | 29414.86 | 2651.38 | 9.39 | 79.74 | 22.54 | 71.73 | 6.73 | 2.65 | 78.90 | 26.45 | 1.32 | 99.90 | 100.00 | 348257.29 | 92000.48 |
| 2013 | 82.63 | 72.30 | 10.33 | 29008.02 | 2643.95 | 9.10 | 82.34 | 23.47 | 71.49 | 6.50 | 2.59 | 79.13 | 27.13 | 1.27 | 99.90 | 100.00 | -         | 92105.54 |
| 2014 | 82.84 | 72.49 | 10.36 | 29496.38 | 2658.27 | 9.03 | 82.39 | 23.99 | 70.88 | 6.40 | 2.63 | 79.36 | 27.82 | 1.32 | 99.90 | 100.00 | -         | 92202.08 |
| 2015 | 82.91 | 72.55 | 10.35 | 30530.57 | -       | -    | -     | -     | -     | -    | -    | 79.58 | 28.51 | 1.32 | 99.90 | 100.00 | -         | 92293.57 |
| 2016 | 82.97 | 72.62 | 10.35 | 31532.82 | -       | -    | -     | -     | -     | -    | -    | 79.80 | 29.02 | -    | -     | -      | -         | 92381.24 |
| 2017 | 83.06 | 72.08 | 10.98 | -        | -       | -    | -     | -     | -     | -    | -    | -     | -     | -    | -     | -      | -         | -        |

|           |      |       |       |      |         |       |      |       |       |       |      |      |       |       |      |       |       |          |          |
|-----------|------|-------|-------|------|---------|-------|------|-------|-------|-------|------|------|-------|-------|------|-------|-------|----------|----------|
| Sri Lanka | 1995 | 71.99 | 63.07 | 8.92 | 1483.16 | 24.56 | 3.44 | 85.86 | 45.54 | 46.96 | 1.62 | 1.82 | 18.50 | 9.38  | 2.29 | 76.00 | 74.00 | 20611.10 | 88863.29 |
|           | 1996 | 71.88 | 63.00 | 8.88 | 1528.03 | 26.17 | 3.46 | 87.61 | 46.81 | 46.57 | 1.61 | 1.85 | 18.49 | 9.40  | 2.27 | 77.00 | 75.10 | 21681.63 | 88923.60 |
|           | 1997 | 71.89 | 63.03 | 8.86 | 1615.87 | 27.31 | 3.34 | 85.89 | 46.84 | 45.47 | 1.52 | 1.82 | 18.48 | 9.39  | 2.25 | 78.00 | 76.30 | 21386.16 | 88998.37 |
|           | 1998 | 71.98 | 63.13 | 8.85 | 1682.43 | 31.58 | 3.71 | 85.89 | 42.45 | 50.58 | 1.88 | 1.83 | 18.47 | 9.35  | 2.24 | 79.10 | 77.40 | 20556.13 | 89082.01 |
|           | 1999 | 72.43 | 63.52 | 8.91 | 1744.65 | 30.65 | 3.65 | 84.51 | 44.11 | 47.80 | 1.75 | 1.91 | 18.46 | 9.31  | 2.24 | 80.10 | 78.60 | 22816.59 | 89138.63 |
|           | 2000 | 72.51 | 63.60 | 8.92 | 1837.14 | 32.82 | 3.77 | 80.83 | 41.30 | 48.91 | 1.85 | 1.93 | 18.44 | 9.28  | 2.24 | 81.20 | 79.70 | 23282.57 | 89186.39 |
|           | 2001 | 73.06 | 64.07 | 8.99 | 1795.08 | 31.69 | 3.81 | 82.31 | 44.30 | 46.18 | 1.76 | 2.05 | 18.43 | 9.44  | 2.25 | 82.20 | 80.80 | 22429.20 | 89207.65 |
|           | 2002 | 73.32 | 64.30 | 9.02 | 1852.26 | 34.88 | 3.89 | 81.08 | 45.97 | 43.30 | 1.68 | 2.20 | 18.42 | 9.61  | 2.26 | 83.30 | 82.00 | 23464.89 | 89214.30 |
|           | 2003 | 73.92 | 64.81 | 9.12 | 1947.48 | 38.85 | 3.95 | 81.40 | 46.86 | 42.43 | 1.68 | 2.28 | 18.41 | 9.77  | 2.27 | 84.30 | 83.10 | 24580.38 | 89211.71 |
|           | 2004 | 69.33 | 60.96 | 8.37 | 2038.04 | 45.67 | 4.28 | 82.71 | 43.98 | 46.83 | 2.01 | 2.28 | 18.39 | 9.94  | 2.28 | 85.40 | 84.20 | 25393.93 | 89226.76 |
|           | 2005 | 73.93 | 64.81 | 9.11 | 2149.04 | 50.76 | 4.06 | 82.53 | 44.93 | 45.56 | 1.85 | 2.21 | 18.38 | 10.13 | 2.28 | 86.40 | 85.40 | 27223.29 | 89264.88 |

|      |       |       |      |         |        |      |       |       |       |      |      |       |       |      |       |       |          |          |
|------|-------|-------|------|---------|--------|------|-------|-------|-------|------|------|-------|-------|------|-------|-------|----------|----------|
| 2006 | 74.25 | 65.11 | 9.15 | 2296.41 | 58.40  | 4.06 | 82.23 | 42.76 | 48.01 | 1.95 | 2.11 | 18.37 | 10.24 | 2.28 | 87.50 | 86.50 | 26000.04 | 89247.76 |
| 2007 | 74.63 | 65.39 | 9.24 | 2434.04 | 61.37  | 3.76 | 81.09 | 48.58 | 48.58 | 1.83 | 1.93 | 18.36 | 10.35 | 2.27 | 88.50 | 87.60 | 27768.84 | 89230.25 |
| 2008 | 73.95 | 64.81 | 9.14 | 2559.47 | 70.30  | 3.44 | 81.08 | 43.86 | 45.91 | 1.58 | 1.86 | 18.35 | 10.47 | 2.26 | 89.60 | 88.80 | 27955.00 | 89238.10 |
| 2009 | 73.86 | 64.71 | 9.15 | 2630.01 | 70.58  | 3.37 | 80.81 | 43.98 | 45.57 | 1.54 | 1.83 | 18.33 | 10.64 | 2.23 | 90.60 | 89.90 | 27826.56 | 89257.78 |
| 2010 | 74.38 | 65.16 | 9.22 | 2819.51 | 84.22  | 3.43 | 81.90 | 44.83 | 45.27 | 1.55 | 1.88 | 18.32 | 10.88 | 2.20 | 91.70 | 91.10 | 29131.29 | 89298.54 |
| 2011 | 75.95 | 66.43 | 9.52 | 3033.56 | 95.59  | 3.28 | 82.99 | 48.06 | 42.08 | 1.38 | 1.90 | 18.31 | 11.44 | 2.17 | 92.70 | 92.20 | 29822.78 | 89337.33 |
| 2012 | 76.30 | 66.73 | 9.57 | 3286.01 | 93.34  | 3.21 | 78.47 | 48.65 | 38.00 | 1.22 | 1.99 | 18.30 | 12.07 | 2.14 | 93.80 | 93.30 | 30451.83 | 89413.63 |
| 2013 | 76.61 | 66.99 | 9.62 | 3371.18 | 120.42 | 3.68 | 95.83 | 41.03 | 57.18 | 2.10 | 1.57 | 18.30 | 12.75 | 2.11 | 94.80 | 94.50 | -        | 89502.63 |
| 2014 | 76.88 | 67.23 | 9.65 | 3506.73 | 127.33 | 3.50 | 95.79 | 42.09 | 56.06 | 1.96 | 1.54 | 18.32 | 13.42 | 2.08 | 95.10 | 95.60 | -        | 89614.00 |
| 2015 | 77.18 | 67.48 | 9.71 | 3642.21 | -      | -    | -     | -     | -     | -    | -    | 18.36 | 14.06 | 2.06 | 95.10 | 95.60 | -        | 89731.80 |
| 2016 | 77.41 | 67.75 | 9.66 | 3759.23 | -      | -    | -     | -     | -     | -    | -    | 18.41 | 14.69 | -    | -     | -     | -        | 89847.03 |
| 2017 | 77.47 | 67.87 | 9.60 | -       | -      | -    | -     | -     | -     | -    | -    | -     | -     | -    | -     | -     | -        | -        |

|       |      |       |       |      |         |        |      |       |       |       |      |      |       |      |      |       |       |           |          |
|-------|------|-------|-------|------|---------|--------|------|-------|-------|-------|------|------|-------|------|------|-------|-------|-----------|----------|
| Sudan | 1995 | 60.39 | 51.39 | 9.00 | 860.00  | 20.73  | 3.98 | 92.67 | 74.40 | 19.72 | 0.79 | 3.20 | 32.23 | 5.71 | 5.83 | 26.90 | 65.50 | 101975.76 | 88883.33 |
|       | 1996 | 60.68 | 51.66 | 9.02 | 886.48  | 14.59  | 4.44 | 92.85 | 69.54 | 25.10 | 1.11 | 3.32 | 32.28 | 5.73 | 5.76 | 26.60 | 64.80 | 103020.19 | 88877.42 |
|       | 1997 | 61.06 | 51.99 | 9.07 | 953.55  | 16.57  | 4.23 | 92.87 | 73.31 | 21.07 | 0.89 | 3.34 | 32.34 | 5.75 | 5.69 | 26.40 | 64.10 | 107153.41 | 88880.40 |
|       | 1998 | 61.45 | 52.33 | 9.12 | 967.41  | 16.78  | 4.11 | 92.62 | 71.29 | 23.03 | 0.95 | 3.17 | 32.39 | 5.76 | 5.61 | 26.00 | 63.40 | 519528.30 | 88904.52 |
|       | 1999 | 61.84 | 52.67 | 9.17 | 969.96  | 14.94  | 3.82 | 92.29 | 73.85 | 19.98 | 0.76 | 3.06 | 32.44 | 5.76 | 5.54 | 25.70 | 62.70 | 511594.67 | 88942.64 |
|       | 2000 | 62.57 | 53.29 | 9.28 | 1003.00 | 15.04  | 3.23 | 89.94 | 65.20 | 27.51 | 0.89 | 2.34 | 32.50 | 5.76 | 5.47 | 25.40 | 62.00 | 529253.88 | 89035.52 |
|       | 2001 | 63.16 | 53.79 | 9.37 | 1038.58 | 16.16  | 2.96 | 89.54 | 66.72 | 25.49 | 0.76 | 2.21 | 32.55 | 5.79 | 5.40 | 25.10 | 61.30 | 423305.60 | 88966.33 |
|       | 2002 | 63.69 | 54.25 | 9.44 | 1074.64 | 18.08  | 2.95 | 89.42 | 65.65 | 26.58 | 0.78 | 2.16 | 32.60 | 5.82 | 5.33 | 24.80 | 60.60 | 516953.93 | 88921.47 |
|       | 2003 | 63.74 | 54.31 | 9.42 | 1125.76 | 22.34  | 3.18 | 89.96 | 64.95 | 27.80 | 0.88 | 2.29 | 32.65 | 5.83 | 5.27 | 24.50 | 59.90 | 499185.49 | 88914.91 |
|       | 2004 | 64.08 | 54.62 | 9.46 | 1137.56 | 29.00  | 3.39 | 90.11 | 61.41 | 31.85 | 1.08 | 2.31 | 32.71 | 5.84 | 5.20 | 24.30 | 59.20 | 485680.68 | 88924.22 |
|       | 2005 | 64.86 | 55.29 | 9.58 | 1189.96 | 34.94  | 3.18 | 88.97 | 58.40 | 34.36 | 1.09 | 2.09 | 32.76 | 5.85 | 5.14 | 24.00 | 58.50 | 536024.45 | 88941.19 |
|       | 2006 | 65.17 | 55.55 | 9.62 | 1275.26 | 54.17  | 3.93 | 91.35 | 61.79 | 32.36 | 1.27 | 2.66 | 32.81 | 5.91 | 5.09 | 23.70 | 57.70 | 453816.36 | 88963.94 |
|       | 2007 | 65.57 | 55.87 | 9.71 | 1385.41 | 83.47  | 4.72 | 92.96 | 32.01 | 32.01 | 1.51 | 3.21 | 32.87 | 5.96 | 5.03 | 23.40 | 57.00 | 634374.73 | 88991.74 |
|       | 2008 | 65.87 | 56.11 | 9.76 | 1455.32 | 114.68 | 8.17 | 95.81 | 64.95 | 32.21 | 2.63 | 5.54 | 32.92 | 6.01 | 4.98 | 23.10 | 56.30 | 572341.41 | 89051.01 |
|       | 2009 | 66.11 | 56.30 | 9.81 | 1464.25 | 109.97 | 8.04 | 95.81 | 67.72 | 29.32 | 2.36 | 5.68 | 32.99 | 6.05 | 4.93 | 22.80 | 55.60 | 559206.07 | 89103.86 |
|       | 2010 | 66.27 | 56.44 | 9.83 | 1476.48 | 118.97 | 7.97 | 95.81 | 63.35 | 33.88 | 2.70 | 5.27 | 33.08 | 6.10 | 4.88 | 22.50 | 54.90 | 487562.73 | 89164.66 |
|       | 2011 | 66.45 | 56.57 | 9.88 | 1592.96 | 120.34 | 8.03 | 95.87 | 65.34 | 31.85 | 2.56 | 5.47 | 33.19 | 6.14 | 4.83 | 23.50 | 55.40 | 489798.21 | 89245.29 |



|           |      |       |       |       |          |         |      |       |       |       |      |      |       |       |      |       |        |          |          |
|-----------|------|-------|-------|-------|----------|---------|------|-------|-------|-------|------|------|-------|-------|------|-------|--------|----------|----------|
| Swaziland | 1995 | 59.31 | 51.66 | 7.66  | 2835.04  | 87.47   | 4.96 | 31.37 | 13.46 | 57.10 | 2.83 | 2.13 | 23.05 | 5.63  | 4.80 | 49.50 | 42.70  | 2292.55  | 89191.40 |
|           | 1996 | 56.87 | 49.61 | 7.25  | 2881.08  | 87.97   | 5.40 | 33.80 | 14.67 | 56.59 | 3.06 | 2.35 | 23.08 | 5.64  | 4.65 | 50.00 | 44.60  | 2314.19  | 89228.47 |
|           | 1997 | 54.82 | 47.88 | 6.94  | 2904.70  | 87.27   | 5.12 | 31.47 | 14.18 | 54.95 | 2.81 | 2.31 | 23.08 | 5.64  | 4.52 | 50.40 | 46.50  | 2385.25  | 89281.69 |
|           | 1998 | 52.16 | 45.63 | 6.52  | 2916.39  | 84.40   | 5.51 | 34.93 | 16.67 | 52.29 | 2.88 | 2.63 | 22.95 | 5.63  | 4.39 | 50.90 | 48.30  | 3994.46  | 89321.51 |
|           | 1999 | 49.83 | 43.62 | 6.20  | 2946.11  | 78.70   | 5.33 | 40.91 | 17.86 | 56.35 | 3.00 | 2.33 | 22.82 | 5.61  | 4.28 | 51.40 | 50.10  | 3251.86  | 89359.80 |
|           | 2000 | 47.40 | 41.36 | 6.04  | 2953.23  | 75.32   | 5.26 | 42.39 | 18.53 | 56.29 | 2.96 | 2.30 | 22.69 | 5.59  | 4.19 | 51.80 | 51.90  | 2814.74  | 89388.03 |
|           | 2001 | 45.46 | 39.75 | 5.71  | 2952.51  | 64.21   | 5.11 | 42.08 | 17.94 | 57.36 | 2.93 | 2.18 | 22.56 | 5.63  | 4.11 | 52.30 | 53.70  | 2694.99  | 89391.22 |
|           | 2002 | 44.19 | 38.70 | 5.50  | 3059.01  | 58.32   | 5.16 | 41.86 | 17.09 | 59.17 | 3.05 | 2.11 | 22.43 | 5.65  | 4.04 | 52.70 | 55.60  | 2760.55  | 89387.87 |
|           | 2003 | 43.24 | 37.86 | 5.38  | 3158.83  | 97.24   | 5.71 | 41.49 | 14.45 | 65.18 | 3.72 | 1.99 | 22.30 | 5.64  | 3.98 | 53.20 | 57.40  | 2632.37  | 89390.66 |
|           | 2004 | 42.62 | 37.30 | 5.32  | 3250.40  | 130.09  | 5.88 | 42.03 | 15.44 | 63.27 | 3.72 | 2.16 | 22.17 | 5.59  | 3.93 | 53.70 | 59.20  | 3058.63  | 89387.15 |
|           | 2005 | 42.32 | 36.93 | 5.39  | 3411.67  | 159.02  | 6.80 | 42.15 | 13.68 | 67.55 | 4.59 | 2.21 | 22.04 | 5.51  | 3.87 | 54.10 | 61.10  | 2940.41  | 89394.44 |
|           | 2006 | 42.93 | 37.47 | 5.46  | 3568.86  | 179.62  | 6.81 | 42.28 | 13.99 | 66.92 | 4.56 | 2.25 | 21.91 | 5.49  | 3.82 | 54.60 | 62.90  | 2646.74  | 89408.35 |
|           | 2007 | 43.80 | 38.20 | 5.60  | 3668.48  | 189.69  | 7.05 | 42.22 | 68.34 | 68.34 | 4.82 | 2.23 | 21.78 | 5.45  | 3.76 | 55.10 | 64.80  | 3715.27  | 89404.13 |
|           | 2008 | 44.46 | 38.74 | 5.73  | 3633.32  | 214.49  | 8.19 | 42.84 | 13.04 | 69.56 | 5.70 | 2.49 | 21.67 | 5.40  | 3.69 | 55.60 | 66.60  | 3255.84  | 89373.68 |
|           | 2009 | 45.51 | 39.59 | 5.92  | 3622.11  | 226.80  | 8.46 | 43.24 | 13.77 | 68.16 | 5.77 | 2.70 | 21.57 | 5.34  | 3.61 | 56.00 | 68.50  | 3032.49  | 89320.25 |
|           | 2010 | 46.91 | 40.68 | 6.23  | 3690.24  | 250.43  | 8.47 | 42.86 | 12.68 | 70.43 | 5.97 | 2.50 | 21.49 | 5.29  | 3.53 | 56.50 | 70.40  | 3378.34  | 89285.05 |
|           | 2011 | 48.80 | 42.45 | 6.34  | 3704.14  | 270.44  | 8.61 | 43.14 | 13.23 | 69.32 | 5.97 | 2.64 | 21.43 | 5.29  | 3.44 | 57.00 | 72.30  | 3430.02  | 89209.58 |
|           | 2012 | 50.34 | 43.85 | 6.49  | 3807.74  | 267.41  | 8.76 | 42.77 | 12.03 | 71.88 | 6.30 | 2.46 | 21.37 | 5.28  | 3.36 | 57.50 | 74.20  | 3478.03  | 89166.55 |
|           | 2013 | 51.80 | 45.11 | 6.69  | 3977.98  | 272.63  | 9.66 | 42.35 | 10.02 | 76.35 | 7.37 | 2.28 | 21.34 | 5.27  | 3.28 | 57.50 | 74.10  | -        | 89161.88 |
|           | 2014 | 53.59 | 46.59 | 7.00  | 3980.77  | 247.90  | 9.25 | 42.35 | 10.29 | 75.71 | 7.00 | 2.25 | 21.32 | 5.26  | 3.20 | 57.50 | 74.10  | -        | 89153.80 |
|           | 2015 | 56.11 | 48.61 | 7.50  | 3923.89  | -       | -    | -     | -     | -     | -    | -    | 21.31 | 5.25  | 3.14 | 57.50 | 74.10  | -        | 89160.05 |
|           | 2016 | 57.44 | 49.62 | 7.82  | 3906.26  | -       | -    | -     | -     | -     | -    | -    | 21.32 | 5.28  | -    | -     | -      | -        | 89168.55 |
|           | 2017 | 59.89 | 51.33 | 8.56  | -        | -       | -    | -     | -     | -     | -    | -    | -     | -     | -    | -     | -      | -        | -        |
| Sweden    | 1995 | 78.86 | 68.40 | 10.46 | 37686.83 | 2291.81 | 7.96 | 99.89 | 13.34 | 86.65 | 6.90 | 1.06 | 83.82 | 27.51 | 1.73 | 99.30 | 100.00 | 82229.84 | 90010.53 |
|           | 1996 | 79.10 | 68.61 | 10.49 | 38198.02 | 2565.39 | 8.20 | 99.88 | 13.06 | 86.93 | 7.13 | 1.07 | 83.91 | 27.45 | 1.60 | 99.30 | 100.00 | 87890.35 | 90157.68 |
|           | 1997 | 79.31 | 68.79 | 10.52 | 39283.45 | 2297.72 | 8.03 | 99.77 | 14.15 | 85.82 | 6.89 | 1.14 | 83.94 | 27.35 | 1.52 | 99.30 | 100.00 | 81623.78 | 90326.33 |
|           | 1998 | 79.44 | 68.91 | 10.53 | 40921.15 | 2336.59 | 8.12 | 95.72 | 13.60 | 85.79 | 6.96 | 1.15 | 83.97 | 27.22 | 1.50 | 99.30 | 100.00 | 83307.06 | 90488.97 |
|           | 1999 | 79.54 | 68.99 | 10.55 | 42741.62 | 2396.26 | 8.20 | 93.80 | 13.39 | 85.73 | 7.03 | 1.17 | 84.00 | 27.08 | 1.50 | 99.30 | 100.00 | 81508.42 | 90655.50 |
|           | 2000 | 79.70 | 69.11 | 10.59 | 44693.74 | 2282.46 | 8.18 | 91.14 | 13.77 | 84.89 | 6.94 | 1.24 | 84.03 | 26.92 | 1.54 | 99.30 | 100.00 | 77926.24 | 90805.83 |

|      |       |       |       |          |         |       |       |       |       |       |      |       |       |      |       |        |          |          |
|------|-------|-------|-------|----------|---------|-------|-------|-------|-------|-------|------|-------|-------|------|-------|--------|----------|----------|
| 2001 | 79.84 | 69.24 | 10.60 | 45270.78 | 2267.83 | 8.86  | 86.86 | 16.39 | 81.14 | 7.19  | 1.67 | 84.07 | 26.78 | 1.57 | 99.30 | 100.00 | 77118.80 | 90860.11 |
| 2002 | 80.00 | 69.38 | 10.62 | 46059.37 | 2599.51 | 9.23  | 86.37 | 16.04 | 81.42 | 7.51  | 1.71 | 84.13 | 26.63 | 1.65 | 99.30 | 100.00 | 78855.44 | 90913.76 |
| 2003 | 80.15 | 69.50 | 10.65 | 46983.08 | 3277.40 | 9.31  | 87.08 | 15.67 | 82.01 | 7.63  | 1.68 | 84.20 | 26.50 | 1.71 | 99.30 | 100.00 | 79443.95 | 90935.88 |
| 2004 | 80.26 | 69.59 | 10.67 | 48820.61 | 3666.47 | 9.09  | 86.17 | 16.05 | 81.37 | 7.40  | 1.69 | 84.26 | 26.45 | 1.75 | 99.30 | 100.00 | 77672.93 | 90963.52 |
| 2005 | 80.54 | 69.80 | 10.74 | 49996.18 | 3726.57 | 9.06  | 87.10 | 16.41 | 81.16 | 7.35  | 1.71 | 84.32 | 26.51 | 1.77 | 99.30 | 100.00 | 74562.61 | 90979.88 |
| 2006 | 80.77 | 69.98 | 10.79 | 52046.48 | 3947.09 | 8.95  | 86.66 | 16.35 | 81.13 | 7.26  | 1.69 | 84.43 | 26.66 | 1.85 | 99.30 | 100.00 | 74171.14 | 91008.54 |
| 2007 | 80.93 | 70.11 | 10.82 | 53421.02 | 4525.77 | 8.92  | 86.79 | 81.36 | 81.36 | 7.25  | 1.66 | 84.59 | 26.86 | 1.88 | 99.30 | 100.00 | 71293.17 | 91021.68 |
| 2008 | 81.09 | 70.23 | 10.86 | 52711.20 | 4886.13 | 9.23  | 87.13 | 16.11 | 81.50 | 7.52  | 1.71 | 84.75 | 27.13 | 1.91 | 99.30 | 100.00 | 69993.28 | 91043.95 |
| 2009 | 81.29 | 70.38 | 10.92 | 49554.34 | 4357.24 | 9.94  | 87.09 | 16.11 | 81.50 | 8.10  | 1.84 | 84.90 | 27.47 | 1.94 | 99.30 | 100.00 | 65034.07 | 91049.68 |
| 2010 | 81.54 | 70.56 | 10.99 | 52076.26 | 4694.46 | 9.47  | 86.62 | 16.01 | 81.51 | 7.72  | 1.75 | 85.06 | 27.91 | 1.98 | 99.30 | 100.00 | 71434.71 | 91068.09 |
| 2011 | 81.70 | 70.67 | 11.03 | 53061.57 | 6662.30 | 11.70 | 87.46 | 13.36 | 84.72 | 9.91  | 1.79 | 85.21 | 28.47 | 1.90 | 99.30 | 100.00 | 68780.33 | 91092.80 |
| 2012 | 81.78 | 70.73 | 11.06 | 52519.68 | 6521.58 | 11.80 | 88.00 | 13.77 | 84.35 | 9.96  | 1.85 | 85.36 | 29.13 | 1.91 | 99.30 | 100.00 | 65767.79 | 91144.43 |
| 2013 | 81.92 | 70.82 | 11.10 | 52722.91 | 7000.16 | 11.97 | 88.07 | 14.09 | 84.00 | 10.05 | 1.91 | 85.51 | 29.84 | 1.89 | 99.30 | 100.00 | -        | 91200.37 |
| 2014 | 82.09 | 70.93 | 11.16 | 53561.89 | 6807.72 | 11.93 | 88.07 | 14.06 | 84.03 | 10.02 | 1.91 | 85.67 | 30.51 | 1.88 | 99.30 | 100.00 | -        | 91270.31 |
| 2015 | 82.07 | 70.92 | 11.16 | 55395.06 | -       | -     | -     | -     | -     | -     | -    | 85.82 | 31.06 | 1.88 | 99.30 | 100.00 | -        | 91345.81 |
| 2016 | 82.05 | 70.88 | 11.16 | 56586.86 | -       | -     | -     | -     | -     | -     | -    | 85.96 | 31.60 | -    | -     | -      | -        | 91434.04 |
| 2017 | 82.50 | 70.93 | 11.57 | -        | -       | -     | -     | -     | -     | -     | -    | -     | -     | -    | -     | -      | -        | -        |

|             |      |       |       |       |          |         |       |       |       |       |      |      |       |       |      |       |        |          |          |
|-------------|------|-------|-------|-------|----------|---------|-------|-------|-------|-------|------|------|-------|-------|------|-------|--------|----------|----------|
| Switzerland | 1995 | 78.53 | 67.88 | 10.65 | 61773.10 | 4308.48 | 9.33  | 71.27 | 33.10 | 53.56 | 5.00 | 4.33 | 73.58 | 21.69 | 1.48 | 99.90 | 100.00 | 54577.65 | 92017.06 |
|             | 1996 | 78.98 | 68.21 | 10.77 | 61833.01 | 4292.36 | 9.72  | 69.18 | 31.50 | 54.47 | 5.29 | 4.42 | 73.53 | 21.94 | 1.50 | 99.90 | 100.00 | 54921.84 | 92053.22 |
|             | 1997 | 79.25 | 68.40 | 10.85 | 63127.74 | 3717.92 | 9.67  | 71.94 | 32.41 | 54.95 | 5.31 | 4.36 | 73.48 | 22.17 | 1.48 | 99.90 | 100.00 | 53612.51 | 92104.61 |
|             | 1998 | 79.51 | 68.58 | 10.93 | 64822.29 | 3869.85 | 9.85  | 72.50 | 32.87 | 54.66 | 5.38 | 4.46 | 73.42 | 22.39 | 1.47 | 99.90 | 100.00 | 54369.68 | 92170.90 |
|             | 1999 | 79.78 | 68.75 | 11.03 | 65607.21 | 3841.31 | 10.00 | 74.40 | 33.38 | 55.14 | 5.52 | 4.49 | 73.37 | 22.58 | 1.48 | 99.90 | 100.00 | 54250.62 | 92236.09 |
|             | 2000 | 79.97 | 68.85 | 11.12 | 67807.93 | 3540.86 | 9.91  | 73.99 | 32.98 | 55.43 | 5.49 | 4.42 | 73.32 | 22.75 | 1.50 | 99.90 | 100.00 | 53063.22 | 92329.21 |
|             | 2001 | 80.21 | 69.07 | 11.14 | 68264.53 | 3751.84 | 10.28 | 73.80 | 31.79 | 56.93 | 5.85 | 4.43 | 73.32 | 22.87 | 1.38 | 99.90 | 100.00 | 54075.37 | 92412.69 |
|             | 2002 | 80.40 | 69.25 | 11.15 | 67860.24 | 4190.45 | 10.61 | 74.68 | 31.56 | 57.74 | 6.12 | 4.48 | 73.36 | 22.96 | 1.39 | 99.90 | 100.00 | 52997.42 | 92492.50 |
|             | 2003 | 80.62 | 69.45 | 11.17 | 67385.30 | 5001.95 | 10.93 | 75.93 | 31.62 | 58.35 | 6.38 | 4.55 | 73.40 | 23.04 | 1.39 | 99.90 | 100.00 | 54552.75 | 92566.86 |
|             | 2004 | 81.03 | 69.77 | 11.25 | 68781.61 | 5570.16 | 10.96 | 76.57 | 31.86 | 58.39 | 6.40 | 4.56 | 73.44 | 23.14 | 1.42 | 99.90 | 100.00 | 55222.56 | 92626.71 |
|             | 2005 | 81.28 | 69.98 | 11.30 | 70471.44 | 5636.55 | 10.86 | 75.56 | 30.63 | 59.46 | 6.46 | 4.40 | 73.47 | 23.29 | 1.42 | 99.90 | 100.00 | 55882.85 | 92693.63 |
|             | 2006 | 81.48 | 70.16 | 11.31 | 72823.84 | 5642.67 | 10.39 | 75.33 | 30.79 | 59.12 | 6.14 | 4.25 | 73.51 | 23.50 | 1.44 | 99.90 | 100.00 | 55762.01 | 92727.99 |

|             |       |       |       |          |         |       |       |        |       |       |      |       |       |      |       |        |          |          |          |
|-------------|-------|-------|-------|----------|---------|-------|-------|--------|-------|-------|------|-------|-------|------|-------|--------|----------|----------|----------|
| 2007        | 81.69 | 70.36 | 11.34 | 75143.70 | 6125.97 | 10.21 | 75.10 | 59.08  | 59.08 | 6.03  | 4.18 | 73.55 | 23.76 | 1.46 | 99.90 | 100.00 | 54112.49 | 92755.87 |          |
| 2008        | 81.92 | 70.55 | 11.37 | 75793.63 | 7103.96 | 10.29 | 71.27 | 24.84  | 65.15 | 6.70  | 3.59 | 73.59 | 24.06 | 1.48 | 99.90 | 100.00 | 56634.89 | 92769.53 |          |
| 2009        | 82.06 | 70.68 | 11.38 | 73189.19 | 7276.70 | 11.00 | 71.58 | 24.67  | 65.54 | 7.21  | 3.79 | 73.63 | 24.42 | 1.50 | 99.90 | 100.00 | 55245.97 | 92780.39 |          |
| 2010        | 82.30 | 70.88 | 11.41 | 74605.72 | 7807.62 | 11.07 | 75.57 | 26.38  | 64.11 | 7.10  | 3.86 | 73.66 | 24.84 | 1.52 | 99.90 | 100.00 | 57154.18 | 92783.23 |          |
| 2011        | 82.54 | 71.14 | 11.41 | 75029.76 | 9386.51 | 11.21 | 75.78 | 26.41  | 64.22 | 7.20  | 3.91 | 73.70 | 25.18 | 1.52 | 99.90 | 100.00 | 53066.87 | 92761.52 |          |
| 2012        | 82.66 | 71.30 | 11.36 | 74984.14 | 9195.75 | 11.59 | 79.38 | 27.24  | 64.70 | 7.50  | 3.98 | 73.74 | 25.57 | 1.52 | 99.90 | 100.00 | 54108.10 | 92753.37 |          |
| 2013        | 82.80 | 71.47 | 11.34 | 75499.71 | 9471.54 | 11.71 | 78.21 | 25.77  | 66.06 | 7.73  | 3.86 | 73.79 | 25.99 | 1.52 | 99.90 | 100.00 | -        | 92745.80 |          |
| 2014        | 83.09 | 71.74 | 11.35 | 76410.86 | 9673.52 | 11.66 | 78.82 | 26.80  | 66.00 | 7.70  | 3.96 | 73.84 | 26.40 | 1.54 | 99.90 | 100.00 | -        | 92734.82 |          |
| 2015        | 83.16 | 71.86 | 11.30 | 76472.46 | -       | -     | -     | -      | -     | -     | -    | 73.91 | 26.77 | 1.54 | 99.90 | 100.00 | -        | 92728.00 |          |
| 2016        | 83.18 | 71.93 | 11.24 | 76694.00 | -       | -     | -     | -      | -     | -     | -    | 73.99 | 27.23 | -    | -     | -      | -        | 92738.64 |          |
| 2017        | 83.96 | 71.98 | 11.98 | -        | -       | -     | -     | -      | -     | -     | -    | -     | -     | -    | -     | -      | -        | -        |          |
| Syrian Arab | 1995  | 72.07 | 61.94 | 10.13    | -       | 51.11 | 5.52  | 100.00 | 60.32 | 39.68 | 2.19 | 3.33  | 50.10 | 6.01 | 4.51  | 85.40  | 86.10    | 60581.46 | 87449.28 |
|             | 1996  | 72.26 | 62.15 | 10.10    | -       | 58.61 | 5.50  | 100.00 | 64.47 | 35.53 | 1.95 | 3.55  | 50.47 | 6.03 | 4.41  | 86.00  | 86.40    | 62105.01 | 87469.08 |
|             | 1997  | 72.41 | 62.33 | 10.08    | -       | 57.93 | 5.30  | 100.00 | 64.56 | 35.44 | 1.88 | 3.42  | 50.84 | 6.04 | 4.32  | 86.70  | 86.70    | 62190.79 | 87514.25 |
|             | 1998  | 72.59 | 62.53 | 10.07    | -       | 55.35 | 5.12  | 100.00 | 61.73 | 38.27 | 1.96 | 3.16  | 51.21 | 6.04 | 4.23  | 87.40  | 87.00    | 66648.61 | 87570.66 |
|             | 1999  | 72.90 | 62.80 | 10.10    | -       | 57.28 | 5.25  | 100.00 | 61.63 | 38.37 | 2.01 | 3.24  | 51.58 | 6.03 | 4.14  | 88.00  | 87.20    | 67571.17 | 87627.17 |
|             | 2000  | 73.24 | 63.12 | 10.12    | -       | 57.89 | 4.92  | 100.00 | 59.55 | 40.45 | 1.99 | 2.93  | 51.95 | 6.00 | 4.04  | 88.60  | 87.50    | 68163.27 | 87701.04 |
|             | 2001  | 73.62 | 63.43 | 10.19    | -       | 56.91 | 4.92  | 100.00 | 55.79 | 44.21 | 2.17 | 2.74  | 52.31 | 5.97 | 3.94  | 89.30  | 87.80    | 65587.33 | 87723.23 |
|             | 2002  | 73.90 | 63.68 | 10.22    | -       | 57.17 | 4.94  | 100.00 | 54.23 | 45.77 | 2.26 | 2.68  | 52.68 | 5.93 | 3.84  | 89.90  | 88.00    | 66236.36 | 87782.94 |
|             | 2003  | 74.19 | 63.93 | 10.26    | -       | 61.07 | 5.12  | 100.00 | 51.75 | 48.25 | 2.47 | 2.65  | 53.05 | 5.89 | 3.74  | 90.50  | 88.20    | 66146.20 | 87866.33 |
|             | 2004  | 74.44 | 64.14 | 10.30    | -       | 61.74 | 4.48  | 100.00 | 52.03 | 47.97 | 2.15 | 2.33  | 53.42 | 5.86 | 3.65  | 91.10  | 88.50    | 66910.84 | 87949.58 |
|             | 2005  | 74.79 | 64.44 | 10.35    | -       | 63.78 | 4.11  | 100.00 | 49.50 | 50.50 | 2.08 | 2.03  | 53.78 | 5.85 | 3.56  | 91.70  | 88.70    | 67605.91 | 88092.69 |
|             | 2006  | 75.02 | 64.62 | 10.40    | -       | 66.96 | 3.78  | 100.00 | 51.46 | 48.54 | 1.83 | 1.94  | 54.15 | 5.82 | 3.47  | 92.30  | 88.90    | 71044.97 | 88249.16 |
|             | 2007  | 75.23 | 64.74 | 10.49    | -       | 77.48 | 3.72  | 100.00 | 48.08 | 48.08 | 1.79 | 1.93  | 54.53 | 5.80 | 3.39  | 92.90  | 89.10    | 73073.07 | 88403.46 |
|             | 2008  | 75.38 | 64.85 | 10.53    | -       | 88.85 | 3.40  | 100.00 | 53.01 | 46.99 | 1.60 | 1.80  | 54.91 | 5.79 | 3.33  | 93.50  | 89.30    | 70097.54 | 88549.15 |
|             | 2009  | 75.64 | 65.05 | 10.60    | -       | 93.06 | 3.55  | 100.00 | 54.00 | 46.00 | 1.63 | 1.92  | 55.29 | 5.78 | 3.26  | 94.00  | 89.50    | 69995.66 | 88666.30 |
|             | 2010  | 76.04 | 65.37 | 10.67    | -       | 95.14 | 3.28  | 100.00 | 54.00 | 46.00 | 1.51 | 1.77  | 55.68 | 5.77 | 3.21  | 94.60  | 89.70    | 73021.04 | 88768.07 |
|             | 2011  | 74.86 | 64.36 | 10.49    | -       | 85.53 | 3.23  | 100.00 | 53.38 | 46.62 | 1.51 | 1.73  | 56.07 | 5.99 | 3.16  | 95.20  | 89.90    | 75181.26 | 88727.39 |
|             | 2012  | 68.02 | 58.86 | 9.17     | -       | 70.98 | 3.25  | 100.00 | 53.69 | 46.31 | 1.51 | 1.75  | 56.46 | 6.21 | 3.11  | 95.70  | 90.10    | 77118.71 | 88734.21 |

|            |      |       |       |      |        |       |      |        |       |       |      |      |       |      |      |       |       |          |          |
|------------|------|-------|-------|------|--------|-------|------|--------|-------|-------|------|------|-------|------|------|-------|-------|----------|----------|
|            | 2013 | 68.79 | 59.43 | 9.36 | -      | 68.83 | 3.25 | 100.00 | 53.69 | 46.31 | 1.51 | 1.75 | 56.86 | 6.43 | 3.07 | 95.70 | 90.10 | -        | 88789.54 |
|            | 2014 | 66.72 | 57.79 | 8.93 | -      | 66.45 | 3.25 | 100.00 | 53.69 | 46.31 | 1.51 | 1.75 | 57.26 | 6.69 | 3.02 | 95.70 | 90.10 | -        | 88925.75 |
|            | 2015 | 68.01 | 58.80 | 9.21 | -      | -     | -    | -      | -     | -     | -    | -    | 57.66 | 6.98 | 2.97 | 95.70 | 90.10 | -        | 89147.17 |
|            | 2016 | 67.99 | 58.84 | 9.15 | -      | -     | -    | -      | -     | -     | -    | -    | 58.06 | 7.15 | -    | -     | -     | -        | 89505.75 |
|            | 2017 | 69.79 | 59.79 | 9.99 | -      | -     | -    | -      | -     | -     | -    | -    | -     | -    | -    | -     | -     | -        | -        |
| Tajikistan | 1995 | 63.81 | 56.18 | 7.63 | 445.16 | 3.01  | 3.07 | 99.19  | 57.48 | 42.06 | 1.29 | 1.78 | 28.88 | 7.44 | 4.59 | 89.50 | 57.70 | 12715.77 | 88187.50 |
|            | 1996 | 62.92 | 55.47 | 7.45 | 365.44 | 5.53  | 3.10 | 97.85  | 56.98 | 41.77 | 1.30 | 1.81 | 28.34 | 7.41 | 4.46 | 89.50 | 57.40 | 12376.24 | 88365.47 |
|            | 1997 | 64.30 | 56.65 | 7.65 | 366.34 | 5.64  | 3.63 | 97.15  | 54.34 | 44.07 | 1.60 | 2.03 | 27.81 | 7.29 | 4.33 | 89.50 | 57.20 | 11524.87 | 88539.34 |
|            | 1998 | 64.35 | 56.72 | 7.63 | 380.16 | 7.81  | 3.56 | 97.58  | 66.29 | 32.07 | 1.14 | 2.42 | 27.28 | 7.10 | 4.19 | 89.80 | 57.90 | 11512.48 | 88732.81 |
|            | 1999 | 64.84 | 57.17 | 7.67 | 388.22 | 6.91  | 3.88 | 96.99  | 70.95 | 26.84 | 1.04 | 2.84 | 26.76 | 6.89 | 4.05 | 90.10 | 58.70 | 11332.11 | 88954.01 |
|            | 2000 | 65.16 | 57.45 | 7.71 | 413.59 | 7.23  | 4.64 | 99.00  | 78.81 | 20.39 | 0.95 | 3.69 | 26.49 | 6.68 | 3.91 | 90.40 | 59.60 | 10059.40 | 89196.33 |
|            | 2001 | 65.45 | 57.75 | 7.71 | 447.78 | 7.81  | 4.59 | 99.17  | 78.63 | 20.71 | 0.95 | 3.64 | 26.46 | 6.72 | 3.78 | 90.70 | 60.60 | 10365.75 | 89287.23 |
|            | 2002 | 65.83 | 58.10 | 7.73 | 486.87 | 8.48  | 4.48 | 98.94  | 78.92 | 20.24 | 0.91 | 3.57 | 26.43 | 6.78 | 3.68 | 91.10 | 61.50 | 10320.59 | 89382.49 |
|            | 2003 | 66.26 | 58.49 | 7.77 | 529.81 | 10.63 | 4.46 | 97.55  | 77.64 | 20.41 | 0.91 | 3.55 | 26.40 | 6.81 | 3.59 | 91.40 | 62.50 | 10832.78 | 89454.28 |
|            | 2004 | 66.75 | 58.93 | 7.82 | 572.54 | 15.78 | 5.07 | 97.68  | 79.51 | 18.61 | 0.94 | 4.13 | 26.42 | 6.77 | 3.53 | 91.70 | 63.60 | 11882.39 | 89527.90 |
|            | 2005 | 67.25 | 59.37 | 7.88 | 598.30 | 19.96 | 5.89 | 97.25  | 78.35 | 19.43 | 1.14 | 4.74 | 26.43 | 6.64 | 3.50 | 92.10 | 64.60 | 12218.02 | 89583.17 |
|            | 2006 | 67.93 | 59.93 | 8.00 | 626.80 | 23.16 | 5.70 | 97.49  | 78.19 | 19.80 | 1.13 | 4.57 | 26.45 | 6.48 | 3.49 | 92.40 | 65.60 | 13240.00 | 89561.15 |
|            | 2007 | 68.44 | 60.35 | 8.10 | 661.34 | 28.00 | 5.35 | 93.83  | 22.16 | 22.16 | 1.18 | 4.16 | 26.47 | 6.28 | 3.49 | 92.70 | 66.60 | 14531.79 | 89527.41 |
|            | 2008 | 68.75 | 60.62 | 8.13 | 698.23 | 39.74 | 5.58 | 95.84  | 72.30 | 24.56 | 1.37 | 4.21 | 26.48 | 6.05 | 3.49 | 93.00 | 67.60 | 14274.60 | 89486.43 |
|            | 2009 | 69.24 | 61.01 | 8.23 | 708.95 | 39.44 | 5.93 | 90.31  | 67.79 | 24.94 | 1.48 | 4.45 | 26.50 | 5.84 | 3.50 | 93.40 | 68.60 | 14128.88 | 89438.61 |
|            | 2010 | 69.51 | 61.24 | 8.27 | 738.35 | 44.96 | 6.04 | 90.81  | 66.85 | 26.39 | 1.59 | 4.45 | 26.52 | 5.66 | 3.51 | 93.70 | 69.70 | 14727.21 | 89378.58 |
|            | 2011 | 69.72 | 61.43 | 8.29 | 775.30 | 50.16 | 5.98 | 86.01  | 61.42 | 28.59 | 1.71 | 4.27 | 26.53 | 5.54 | 3.50 | 94.00 | 70.70 | 15285.82 | 89306.61 |
|            | 2012 | 70.36 | 61.93 | 8.43 | 814.78 | 61.19 | 6.39 | 85.08  | 60.09 | 29.37 | 1.88 | 4.51 | 26.57 | 5.45 | 3.49 | 94.40 | 71.70 | 15364.58 | 89224.95 |
|            | 2013 | 70.94 | 62.38 | 8.56 | 855.51 | 70.80 | 6.75 | 86.65  | 60.12 | 30.62 | 2.07 | 4.68 | 26.62 | 5.38 | 3.47 | 94.70 | 72.70 | -        | 89150.39 |
|            | 2014 | 71.25 | 62.62 | 8.62 | 892.64 | 76.39 | 6.88 | 86.69  | 61.69 | 28.83 | 1.98 | 4.90 | 26.69 | 5.36 | 3.44 | 95.00 | 73.70 | -        | 89094.11 |
|            | 2015 | 71.51 | 62.84 | 8.67 | 925.62 | -     | -    | -      | -     | -     | -    | -    | 26.78 | 5.40 | 3.40 | 95.00 | 73.80 | -        | 89044.07 |
|            | 2016 | 71.76 | 63.09 | 8.67 | 968.39 | -     | -    | -      | -     | -     | -    | -    | 26.89 | 5.51 | -    | -     | -     | -        | 89000.88 |
|            | 2017 | 70.32 | 61.32 | 9.01 | -      | -     | -    | -      | -     | -     | -    | -    | -     | -    | -    | -     | -     | -        | -        |
| Tanzania   | 1995 | 52.89 | 46.18 | 6.71 | 459.17 | 6.77  | 3.01 | 83.47  | 45.60 | 45.37 | 1.37 | 1.65 | 20.54 | 5.33 | 5.88 | 7.80  | 54.20 | 90916.00 | 88602.50 |

|      |       |       |      |        |       |      |       |       |       |      |      |       |      |      |       |       |           |          |
|------|-------|-------|------|--------|-------|------|-------|-------|-------|------|------|-------|------|------|-------|-------|-----------|----------|
| 1996 | 52.64 | 46.01 | 6.64 | 466.81 | 7.50  | 2.78 | 83.47 | 48.17 | 42.30 | 1.17 | 1.60 | 20.89 | 5.37 | 5.83 | 8.10  | 54.20 | 79397.97  | 88601.95 |
| 1997 | 52.48 | 45.89 | 6.59 | 470.72 | 8.64  | 2.78 | 83.47 | 49.58 | 40.60 | 1.13 | 1.65 | 21.24 | 5.40 | 5.78 | 8.40  | 54.30 | 76244.39  | 88607.16 |
| 1998 | 52.47 | 45.90 | 6.57 | 475.93 | 9.40  | 2.54 | 83.47 | 50.34 | 39.69 | 1.01 | 1.53 | 21.59 | 5.41 | 5.74 | 8.70  | 54.30 | 286147.05 | 88625.37 |
| 1999 | 52.53 | 45.96 | 6.57 | 486.41 | 9.99  | 2.67 | 83.47 | 48.47 | 41.93 | 1.12 | 1.55 | 21.95 | 5.42 | 5.71 | 9.00  | 54.30 | 157566.04 | 88652.54 |
| 2000 | 52.85 | 46.23 | 6.63 | 497.20 | 10.12 | 2.64 | 83.47 | 47.26 | 43.38 | 1.15 | 1.50 | 22.31 | 5.41 | 5.69 | 9.30  | 54.40 | 215939.36 | 88673.47 |
| 2001 | 53.36 | 46.68 | 6.67 | 512.97 | 12.46 | 3.28 | 85.69 | 39.41 | 54.00 | 1.77 | 1.51 | 22.67 | 5.48 | 5.68 | 9.60  | 54.40 | 196701.20 | 88438.79 |
| 2002 | 53.83 | 47.12 | 6.71 | 534.70 | 13.82 | 3.59 | 87.59 | 36.19 | 58.69 | 2.11 | 1.48 | 23.04 | 5.54 | 5.67 | 9.90  | 54.40 | 183662.08 | 88234.59 |
| 2003 | 54.30 | 47.55 | 6.75 | 555.50 | 16.39 | 4.06 | 87.31 | 31.90 | 63.46 | 2.57 | 1.48 | 23.61 | 5.60 | 5.66 | 10.20 | 54.50 | 259727.88 | 88042.22 |
| 2004 | 54.79 | 47.99 | 6.80 | 581.77 | 17.70 | 4.10 | 80.11 | 29.93 | 62.65 | 2.57 | 1.53 | 24.22 | 5.65 | 5.65 | 10.60 | 54.60 | 221348.89 | 87871.77 |
| 2005 | 55.30 | 48.45 | 6.85 | 610.82 | 21.57 | 4.66 | 69.07 | 25.15 | 63.59 | 2.97 | 1.70 | 24.85 | 5.69 | 5.64 | 11.00 | 54.70 | 269558.99 | 87719.94 |
| 2006 | 56.00 | 49.10 | 6.91 | 620.06 | 31.22 | 6.86 | 54.31 | 16.62 | 69.40 | 4.76 | 2.10 | 25.48 | 5.76 | 5.62 | 11.40 | 54.80 | 167500.80 | 87620.36 |
| 2007 | 56.98 | 49.94 | 7.04 | 651.90 | 24.43 | 4.72 | 39.63 | 64.40 | 64.40 | 3.04 | 1.68 | 26.12 | 5.82 | 5.58 | 11.80 | 54.90 | 202224.85 | 87532.65 |
| 2008 | 57.97 | 50.82 | 7.16 | 666.81 | 26.94 | 4.21 | 38.98 | 16.45 | 57.80 | 2.44 | 1.78 | 26.78 | 5.87 | 5.54 | 12.20 | 55.00 | 201404.52 | 87460.20 |
| 2009 | 58.58 | 51.36 | 7.22 | 680.81 | 25.68 | 3.97 | 38.51 | 18.06 | 53.09 | 2.11 | 1.86 | 27.44 | 5.91 | 5.49 | 12.60 | 55.10 | 231456.25 | 87396.73 |
| 2010 | 59.29 | 51.99 | 7.30 | 701.60 | 36.09 | 5.30 | 52.43 | 31.91 | 39.14 | 2.07 | 3.22 | 28.11 | 5.96 | 5.43 | 13.10 | 55.20 | 234147.16 | 87346.06 |
| 2011 | 59.93 | 52.64 | 7.29 | 733.67 | 40.73 | 5.72 | 52.45 | 29.64 | 43.49 | 2.49 | 3.23 | 28.80 | 5.98 | 5.36 | 13.60 | 55.30 | 234762.03 | 87372.34 |
| 2012 | 60.66 | 53.34 | 7.33 | 747.66 | 45.64 | 5.72 | 42.88 | 21.97 | 48.77 | 2.79 | 2.93 | 29.49 | 6.00 | 5.29 | 14.00 | 55.40 | 235353.12 | 87411.74 |
| 2013 | 61.72 | 54.28 | 7.44 | 777.40 | 49.17 | 5.57 | 43.32 | 23.37 | 46.06 | 2.57 | 3.00 | 30.20 | 6.02 | 5.22 | 14.50 | 55.40 | -         | 87444.54 |
| 2014 | 62.60 | 55.05 | 7.55 | 806.15 | 51.72 | 5.58 | 43.32 | 23.21 | 46.41 | 2.59 | 2.99 | 30.90 | 6.03 | 5.15 | 15.00 | 55.50 | -         | 87525.39 |
| 2015 | 63.45 | 55.79 | 7.66 | 835.97 | -     | -    | -     | -     | -     | -    | -    | 31.61 | 6.02 | 5.08 | 15.60 | 55.60 | -         | 87615.85 |
| 2016 | 64.29 | 56.53 | 7.76 | 866.95 | -     | -    | -     | -     | -     | -    | -    | 32.32 | 6.00 | -    | -     | -     | -         | 87703.12 |
| 2017 | 66.72 | 58.23 | 8.49 | -      | -     | -    | -     | -     | -     | -    | -    | -     | -    | -    | -     | -     | -         | -        |

|          |      |       |       |      |         |        |      |       |       |       |      |      |       |      |      |       |       |           |          |
|----------|------|-------|-------|------|---------|--------|------|-------|-------|-------|------|------|-------|------|------|-------|-------|-----------|----------|
| Thailand | 1995 | 70.77 | 62.08 | 8.69 | 3530.29 | 100.12 | 3.53 | 80.36 | 42.59 | 47.01 | 1.66 | 1.87 | 30.28 | 8.11 | 1.87 | 89.10 | 89.60 | 281623.81 | 89391.45 |
|          | 1996 | 70.93 | 62.21 | 8.72 | 3688.93 | 116.71 | 3.84 | 80.44 | 42.49 | 47.18 | 1.81 | 2.03 | 30.45 | 8.35 | 1.82 | 89.60 | 90.10 | 295588.19 | 89480.72 |
|          | 1997 | 71.06 | 62.32 | 8.74 | 3545.39 | 99.60  | 4.00 | 80.07 | 36.88 | 53.95 | 2.16 | 1.84 | 30.62 | 8.60 | 1.78 | 90.00 | 90.50 | 300754.97 | 89588.42 |
|          | 1998 | 71.23 | 62.46 | 8.77 | 3235.73 | 68.22  | 3.74 | 78.29 | 35.37 | 54.82 | 2.05 | 1.69 | 30.80 | 8.85 | 1.74 | 90.50 | 91.00 | 400464.25 | 89726.36 |
|          | 1999 | 71.49 | 62.66 | 8.83 | 3345.16 | 69.18  | 3.50 | 76.50 | 34.51 | 54.89 | 1.92 | 1.58 | 30.97 | 9.12 | 1.71 | 90.90 | 91.40 | 316589.12 | 89869.12 |
|          | 2000 | 71.89 | 62.98 | 8.91 | 3458.05 | 66.47  | 3.40 | 76.89 | 33.72 | 56.15 | 1.91 | 1.49 | 31.39 | 9.41 | 1.67 | 91.30 | 91.90 | 283870.04 | 90027.31 |
|          | 2001 | 72.33 | 63.36 | 8.97 | 3544.21 | 60.41  | 3.32 | 75.82 | 33.07 | 56.38 | 1.87 | 1.45 | 32.57 | 9.71 | 1.64 | 91.70 | 92.40 | 287255.60 | 90131.12 |

|      |       |       |      |         |        |      |       |       |       |      |      |       |       |      |       |       |           |          |
|------|-------|-------|------|---------|--------|------|-------|-------|-------|------|------|-------|-------|------|-------|-------|-----------|----------|
| 2002 | 72.77 | 63.75 | 9.02 | 3731.03 | 73.20  | 3.70 | 74.55 | 27.20 | 63.52 | 2.35 | 1.35 | 33.78 | 10.02 | 1.62 | 92.10 | 92.90 | 322454.08 | 90257.45 |
| 2003 | 73.23 | 64.16 | 9.07 | 3969.42 | 78.83  | 3.58 | 74.15 | 26.85 | 63.79 | 2.28 | 1.30 | 35.01 | 10.34 | 1.60 | 92.50 | 93.30 | 324192.72 | 90374.69 |
| 2004 | 73.34 | 64.28 | 9.06 | 4190.03 | 86.68  | 3.51 | 74.34 | 26.09 | 64.91 | 2.28 | 1.23 | 36.26 | 10.65 | 1.58 | 92.80 | 93.80 | 380171.27 | 90495.18 |
| 2005 | 74.11 | 64.98 | 9.13 | 4337.26 | 95.01  | 3.55 | 76.49 | 27.23 | 64.39 | 2.29 | 1.26 | 37.52 | 10.94 | 1.57 | 93.20 | 94.30 | 364315.70 | 90621.19 |
| 2006 | 74.60 | 65.41 | 9.19 | 4525.16 | 109.32 | 3.49 | 63.67 | 17.38 | 72.70 | 2.54 | 0.95 | 38.80 | 11.21 | 1.56 | 93.50 | 94.70 | 349980.87 | 90726.56 |
| 2007 | 75.05 | 65.75 | 9.31 | 4744.33 | 132.66 | 3.56 | 61.25 | 76.33 | 76.33 | 2.72 | 0.84 | 40.10 | 11.48 | 1.56 | 93.50 | 95.20 | 388568.00 | 90830.23 |
| 2008 | 75.55 | 66.15 | 9.40 | 4800.81 | 160.94 | 3.92 | 60.93 | 14.69 | 75.89 | 2.98 | 0.95 | 41.42 | 11.75 | 1.55 | 93.50 | 95.60 | 357708.28 | 90940.29 |
| 2009 | 76.05 | 66.54 | 9.50 | 4743.69 | 162.97 | 4.11 | 59.59 | 15.37 | 74.21 | 3.05 | 1.06 | 42.74 | 12.05 | 1.55 | 93.40 | 96.00 | 363782.11 | 91062.60 |
| 2010 | 76.53 | 66.97 | 9.56 | 5075.30 | 182.14 | 3.81 | 55.86 | 14.19 | 74.59 | 2.84 | 0.97 | 44.08 | 12.39 | 1.55 | 93.30 | 96.40 | 421227.83 | 91179.68 |
| 2011 | 76.86 | 67.17 | 9.69 | 5093.58 | 212.86 | 4.12 | 55.76 | 12.43 | 77.70 | 3.20 | 0.92 | 45.39 | 12.80 | 1.54 | 93.30 | 96.80 | 431312.31 | 91277.71 |
| 2012 | 77.13 | 67.39 | 9.74 | 5437.24 | 227.19 | 4.17 | 56.86 | 12.57 | 77.90 | 3.25 | 0.92 | 46.68 | 13.23 | 1.53 | 93.20 | 97.10 | 440411.68 | 91375.00 |
| 2013 | 77.28 | 67.52 | 9.76 | 5561.29 | 229.88 | 4.00 | 53.76 | 12.21 | 77.30 | 3.09 | 0.91 | 47.94 | 13.70 | 1.52 | 93.10 | 97.50 | -         | 91473.78 |
| 2014 | 77.45 | 67.65 | 9.79 | 5589.70 | 227.52 | 4.12 | 53.79 | 11.92 | 77.83 | 3.21 | 0.91 | 49.17 | 14.22 | 1.51 | 93.00 | 97.80 | -         | 91575.18 |
| 2015 | 77.58 | 67.76 | 9.82 | 5733.92 | -      | -    | -     | -     | -     | -    | -    | 50.37 | 14.79 | 1.50 | 93.00 | 97.80 | -         | 91684.66 |
| 2016 | 77.70 | 67.94 | 9.77 | 5901.88 | -      | -    | -     | -     | -     | -    | -    | 51.54 | 15.34 | -    | -     | -     | -         | 91796.26 |
| 2017 | 78.11 | 68.46 | 9.65 | -       | -      | -    | -     | -     | -     | -    | -    | -     | -     | -    | -     | -     | -         | -        |

|             |      |       |       |      |          |        |      |       |       |       |      |      |       |       |      |       |       |            |          |
|-------------|------|-------|-------|------|----------|--------|------|-------|-------|-------|------|------|-------|-------|------|-------|-------|------------|----------|
| The Russian | 1995 | 64.34 | 56.38 | 7.96 | 5919.34  | 113.31 | 5.36 | 64.66 | 16.89 | 73.88 | 3.96 | 1.40 | 73.37 | 18.25 | 1.34 | 72.60 | 94.20 | 2645144.69 | 92013.48 |
|             | 1996 | 65.63 | 57.42 | 8.21 | 5714.55  | 146.98 | 5.55 | 63.21 | 18.06 | 71.44 | 3.97 | 1.59 | 73.37 | 18.40 | 1.27 | 72.60 | 94.30 | 2718564.86 | 92207.05 |
|             | 1997 | 66.80 | 58.35 | 8.46 | 5804.14  | 194.57 | 7.10 | 61.90 | 18.08 | 70.79 | 5.03 | 2.07 | 73.36 | 18.30 | 1.22 | 72.50 | 94.40 | 2457479.79 | 92374.55 |
|             | 1998 | 67.09 | 58.56 | 8.53 | 5505.63  | 121.70 | 6.62 | 65.92 | 23.01 | 65.09 | 4.31 | 2.31 | 73.36 | 18.08 | 1.23 | 72.50 | 94.60 | 3459685.66 | 92551.41 |
|             | 1999 | 65.87 | 57.55 | 8.32 | 5876.15  | 77.28  | 5.80 | 72.09 | 27.49 | 61.86 | 3.59 | 2.21 | 73.35 | 17.93 | 1.16 | 72.50 | 94.70 | 2512656.97 | 92714.78 |
|             | 2000 | 65.28 | 57.03 | 8.25 | 6491.00  | 96.19  | 5.42 | 74.70 | 29.97 | 59.88 | 3.25 | 2.18 | 73.35 | 17.95 | 1.20 | 72.50 | 94.90 | 2771222.00 | 92864.62 |
|             | 2001 | 65.28 | 57.17 | 8.11 | 6850.52  | 119.11 | 5.67 | 73.74 | 30.48 | 58.66 | 3.33 | 2.35 | 73.35 | 18.31 | 1.22 | 72.40 | 95.00 | 2649244.38 | 92873.63 |
|             | 2002 | 65.13 | 57.10 | 8.03 | 7208.57  | 142.17 | 5.99 | 75.19 | 30.86 | 58.95 | 3.53 | 2.46 | 73.34 | 18.80 | 1.29 | 72.40 | 95.20 | 2984844.66 | 92857.89 |
|             | 2003 | 65.18 | 57.16 | 8.02 | 7769.67  | 167.37 | 5.61 | 79.71 | 32.83 | 58.81 | 3.30 | 2.31 | 73.37 | 19.29 | 1.32 | 72.40 | 95.30 | 3542027.45 | 92819.55 |
|             | 2004 | 65.46 | 57.44 | 8.03 | 8360.81  | 213.48 | 5.19 | 82.24 | 33.24 | 59.58 | 3.09 | 2.10 | 73.42 | 19.55 | 1.34 | 72.40 | 95.50 | 2413520.92 | 92793.83 |
|             | 2005 | 65.61 | 57.58 | 8.03 | 8927.91  | 276.91 | 5.21 | 82.39 | 31.32 | 61.98 | 3.23 | 1.98 | 73.46 | 19.46 | 1.29 | 72.40 | 95.60 | 2527172.17 | 92789.00 |
|             | 2006 | 66.85 | 58.58 | 8.27 | 9687.49  | 367.68 | 5.30 | 81.50 | 29.97 | 63.23 | 3.35 | 1.95 | 73.51 | 19.38 | 1.31 | 72.30 | 95.80 | 2748951.04 | 92718.23 |
|             | 2007 | 67.56 | 59.12 | 8.43 | 10532.33 | 490.02 | 5.38 | 83.02 | 64.18 | 64.18 | 3.45 | 1.93 | 73.55 | 19.06 | 1.42 | 72.30 | 95.90 | 2604102.33 | 92634.14 |

|      |       |       |      |          |         |      |       |       |       |      |      |       |       |      |       |       |            |          |
|------|-------|-------|------|----------|---------|------|-------|-------|-------|------|------|-------|-------|------|-------|-------|------------|----------|
| 2008 | 67.87 | 59.37 | 8.50 | 11089.93 | 718.67  | 6.22 | 91.22 | 39.63 | 56.55 | 3.52 | 2.70 | 73.60 | 18.64 | 1.50 | 72.30 | 96.10 | 2995286.60 | 92531.84 |
| 2009 | 68.85 | 60.12 | 8.73 | 10219.52 | 631.99  | 7.44 | 93.86 | 41.41 | 55.88 | 4.16 | 3.28 | 73.64 | 18.32 | 1.54 | 72.30 | 96.20 | 2562920.98 | 92433.49 |
| 2010 | 69.22 | 60.45 | 8.77 | 10674.99 | 727.37  | 6.83 | 94.39 | 43.30 | 54.12 | 3.70 | 3.13 | 73.69 | 18.17 | 1.57 | 72.30 | 96.30 | 2603289.63 | 92359.53 |
| 2011 | 69.86 | 60.91 | 8.96 | 11121.51 | 879.60  | 6.61 | 94.63 | 43.36 | 54.18 | 3.58 | 3.03 | 73.73 | 18.27 | 1.58 | 72.30 | 96.50 | 2777724.31 | 92261.17 |
| 2012 | 70.45 | 61.37 | 9.08 | 11493.40 | 963.49  | 6.88 | 94.92 | 42.55 | 55.18 | 3.80 | 3.08 | 73.79 | 18.45 | 1.69 | 72.20 | 96.60 | 2803398.49 | 92181.59 |
| 2013 | 70.76 | 61.63 | 9.13 | 11615.70 | 1023.90 | 7.09 | 95.20 | 45.43 | 52.28 | 3.71 | 3.38 | 73.85 | 18.68 | 1.71 | 72.20 | 96.80 | -          | 92110.31 |
| 2014 | 70.86 | 61.73 | 9.13 | 11493.73 | 892.85  | 7.07 | 95.92 | 45.85 | 52.20 | 3.69 | 3.38 | 73.92 | 18.97 | 1.75 | 72.20 | 96.90 | -          | 92048.21 |
| 2015 | 70.83 | 61.76 | 9.08 | 11144.60 | -       | -    | -     | -     | -     | -    | -    | 74.01 | 19.36 | 1.75 | 72.20 | 96.90 | -          | 92030.83 |
| 2016 | 70.87 | 61.91 | 8.96 | 11099.17 | -       | -    | -     | -     | -     | -    | -    | 74.10 | 20.01 | -    | -     | -     | -          | 92048.77 |
| 2017 | 72.08 | 62.16 | 9.92 | -        | -       | -    | -     | -     | -     | -    | -    | -     | -     | -    | -     | -     | -          | -        |

|      |      |       |       |      |        |       |      |       |       |       |      |      |       |      |      |       |       |          |          |
|------|------|-------|-------|------|--------|-------|------|-------|-------|-------|------|------|-------|------|------|-------|-------|----------|----------|
| Togo | 1995 | 57.17 | 49.63 | 7.55 | 484.94 | 13.45 | 3.99 | 83.46 | 51.78 | 37.96 | 1.51 | 2.48 | 30.71 | 5.78 | 5.76 | 11.50 | 50.50 | 12779.71 | 89650.90 |
|      | 1996 | 56.95 | 49.46 | 7.49 | 512.88 | 14.40 | 4.01 | 83.57 | 52.78 | 36.84 | 1.48 | 2.53 | 31.14 | 5.70 | 5.67 | 11.50 | 51.10 | 13188.63 | 89684.95 |
|      | 1997 | 56.47 | 49.08 | 7.39 | 568.98 | 13.83 | 3.88 | 83.41 | 56.22 | 32.59 | 1.26 | 2.61 | 31.58 | 5.60 | 5.59 | 11.40 | 51.70 | 13225.65 | 89737.67 |
|      | 1998 | 56.22 | 48.88 | 7.34 | 538.73 | 12.88 | 3.92 | 82.47 | 50.40 | 38.89 | 1.52 | 2.39 | 32.02 | 5.50 | 5.52 | 11.40 | 52.30 | 29197.54 | 89776.95 |
|      | 1999 | 56.44 | 49.04 | 7.40 | 535.32 | 12.86 | 4.01 | 83.23 | 53.71 | 35.47 | 1.42 | 2.58 | 32.46 | 5.39 | 5.46 | 11.40 | 53.00 | 19898.01 | 89822.10 |
|      | 2000 | 56.33 | 48.92 | 7.41 | 515.67 | 11.52 | 4.35 | 84.70 | 57.01 | 32.69 | 1.42 | 2.93 | 32.91 | 5.29 | 5.41 | 11.40 | 53.60 | 22054.71 | 89861.34 |
|      | 2001 | 56.19 | 48.86 | 7.33 | 493.25 | 11.40 | 4.29 | 84.05 | 59.49 | 29.22 | 1.25 | 3.03 | 33.36 | 5.26 | 5.36 | 11.40 | 54.20 | 18097.70 | 89867.67 |
|      | 2002 | 56.24 | 48.94 | 7.30 | 475.70 | 11.65 | 4.07 | 80.25 | 62.37 | 22.28 | 0.91 | 3.16 | 33.81 | 5.21 | 5.32 | 11.40 | 54.80 | 20990.36 | 89884.72 |
|      | 2003 | 56.02 | 48.79 | 7.23 | 486.31 | 15.82 | 5.00 | 80.55 | 57.32 | 28.85 | 1.44 | 3.56 | 34.27 | 5.15 | 5.28 | 11.40 | 55.40 | 20323.80 | 89884.07 |
|      | 2004 | 56.40 | 49.11 | 7.29 | 483.77 | 18.04 | 5.06 | 79.43 | 53.00 | 33.28 | 1.68 | 3.38 | 34.72 | 5.10 | 5.23 | 11.40 | 56.00 | 14388.00 | 89907.78 |
|      | 2005 | 56.41 | 49.12 | 7.29 | 476.67 | 19.59 | 5.17 | 79.25 | 50.16 | 36.71 | 1.90 | 3.27 | 35.19 | 5.03 | 5.18 | 11.40 | 56.70 | 32080.96 | 89929.43 |
|      | 2006 | 56.99 | 49.66 | 7.33 | 482.86 | 21.34 | 5.56 | 78.49 | 46.60 | 40.64 | 2.26 | 3.30 | 35.65 | 5.04 | 5.12 | 11.40 | 57.30 | 17748.18 | 89931.86 |
|      | 2007 | 57.14 | 49.85 | 7.29 | 480.78 | 23.73 | 5.55 | 78.15 | 38.90 | 38.90 | 2.16 | 3.39 | 36.12 | 5.03 | 5.06 | 11.40 | 57.90 | 19389.96 | 89939.03 |
|      | 2008 | 57.39 | 50.10 | 7.29 | 478.36 | 29.92 | 5.73 | 78.68 | 45.51 | 42.16 | 2.42 | 3.32 | 36.59 | 5.01 | 5.00 | 11.50 | 58.60 | 27174.08 | 89962.78 |
|      | 2009 | 58.04 | 50.68 | 7.37 | 481.96 | 33.75 | 6.64 | 77.11 | 39.02 | 49.40 | 3.28 | 3.36 | 37.06 | 4.99 | 4.94 | 11.50 | 59.20 | 23856.09 | 89977.70 |
|      | 2010 | 58.74 | 51.28 | 7.46 | 487.92 | 26.65 | 5.37 | 74.70 | 47.72 | 36.12 | 1.94 | 3.43 | 37.53 | 4.96 | 4.87 | 11.50 | 59.80 | 22578.12 | 90011.02 |
|      | 2011 | 59.63 | 52.15 | 7.48 | 498.24 | 29.80 | 5.21 | 75.65 | 51.61 | 31.78 | 1.66 | 3.55 | 38.01 | 4.99 | 4.80 | 11.50 | 60.50 | 22760.64 | 90028.29 |
|      | 2012 | 60.35 | 52.84 | 7.52 | 508.54 | 29.67 | 5.11 | 75.01 | 46.42 | 38.11 | 1.95 | 3.16 | 38.49 | 5.02 | 4.73 | 11.50 | 61.10 | 22931.86 | 90067.56 |
|      | 2013 | 60.92 | 53.37 | 7.55 | 514.94 | 32.14 | 5.12 | 74.64 | 43.32 | 41.97 | 2.15 | 2.97 | 38.98 | 5.04 | 4.66 | 11.60 | 61.80 | -        | 90096.01 |

|              |      |       |       |      |         |        |      |       |       |       |      |      |       |       |      |       |       |        |          |
|--------------|------|-------|-------|------|---------|--------|------|-------|-------|-------|------|------|-------|-------|------|-------|-------|--------|----------|
|              | 2014 | 61.47 | 53.87 | 7.60 | 531.16  | 33.89  | 5.25 | 75.13 | 46.24 | 38.45 | 2.02 | 3.23 | 39.47 | 5.05  | 4.59 | 11.60 | 62.40 | -      | 90144.35 |
|              | 2015 | 62.06 | 54.40 | 7.66 | 544.90  | -      | -    | -     | -     | -     | -    | -    | 39.96 | 5.05  | 4.52 | 11.60 | 63.10 | -      | 90186.79 |
|              | 2016 | 62.59 | 54.87 | 7.72 | 558.12  | -      | -    | -     | -     | -     | -    | -    | 40.46 | 5.09  | -    | -     | -     | -      | 90228.81 |
|              | 2017 | 64.37 | 55.84 | 8.53 | -       | -      | -    | -     | -     | -     | -    | -    | -     | -     | -    | -     | -     | -      | -        |
| Tonga        | 1995 | 68.36 | 59.75 | 8.61 | 3035.55 | 87.25  | 4.13 | 77.47 | 27.38 | 64.66 | 2.67 | 1.46 | 22.86 | 9.73  | 4.45 | 93.70 | 98.60 | 150.45 | 85258.00 |
|              | 1996 | 68.45 | 59.82 | 8.63 | 3026.63 | 96.22  | 4.21 | 77.47 | 26.06 | 66.36 | 2.80 | 1.42 | 22.90 | 9.92  | 4.39 | 93.50 | 98.60 | 154.37 | 85317.99 |
|              | 1997 | 68.59 | 59.92 | 8.66 | 3011.53 | 98.44  | 4.48 | 77.47 | 24.88 | 67.88 | 3.04 | 1.44 | 22.93 | 10.02 | 4.34 | 93.40 | 98.60 | 152.25 | 85413.31 |
|              | 1998 | 68.67 | 59.98 | 8.69 | 3080.35 | 92.01  | 4.73 | 77.47 | 24.82 | 67.96 | 3.21 | 1.51 | 22.96 | 10.11 | 4.30 | 93.20 | 98.60 | 142.26 | 85483.22 |
|              | 1999 | 68.66 | 59.97 | 8.70 | 3184.97 | 102.82 | 5.14 | 77.47 | 20.79 | 73.17 | 3.76 | 1.38 | 22.98 | 10.18 | 4.27 | 93.10 | 98.60 | 140.79 | 85554.74 |
|              | 2000 | 68.72 | 59.99 | 8.73 | 3275.81 | 91.61  | 4.75 | 77.47 | 22.88 | 70.47 | 3.35 | 1.40 | 23.01 | 10.24 | 4.25 | 93.00 | 98.60 | 175.12 | 85605.57 |
|              | 2001 | 68.86 | 60.11 | 8.75 | 3375.59 | 96.03  | 5.66 | 77.47 | 18.82 | 75.71 | 4.28 | 1.37 | 23.04 | 10.38 | 4.24 | 92.80 | 98.60 | 174.84 | 85696.78 |
|              | 2002 | 68.97 | 60.20 | 8.78 | 3470.83 | 92.36  | 5.03 | 77.47 | 18.82 | 75.71 | 3.81 | 1.22 | 23.07 | 10.53 | 4.22 | 92.70 | 98.60 | 150.11 | 85743.63 |
|              | 2003 | 69.07 | 60.27 | 8.80 | 3522.53 | 106.14 | 5.09 | 62.94 | 10.59 | 83.17 | 4.23 | 0.86 | 23.10 | 10.67 | 4.20 | 92.50 | 98.60 | 158.06 | 85782.55 |
|              | 2004 | 69.20 | 60.36 | 8.84 | 3488.58 | 114.81 | 4.87 | 62.94 | 10.59 | 83.17 | 4.05 | 0.82 | 23.13 | 10.76 | 4.18 | 92.40 | 98.60 | 152.49 | 85830.72 |
|              | 2005 | 69.43 | 60.53 | 8.90 | 3521.51 | 167.36 | 6.52 | 62.26 | 8.05  | 87.07 | 5.68 | 0.84 | 23.16 | 10.81 | 4.14 | 92.30 | 98.70 | 153.79 | 85863.00 |
|              | 2006 | 69.61 | 60.67 | 8.94 | 3470.65 | 159.05 | 5.61 | 62.26 | 8.07  | 87.04 | 4.88 | 0.73 | 23.18 | 10.80 | 4.10 | 92.10 | 98.80 | 152.77 | 85873.12 |
|              | 2007 | 69.65 | 60.69 | 8.96 | 3304.36 | 170.63 | 5.82 | 67.82 | 81.87 | 81.87 | 4.76 | 1.05 | 23.23 | 10.75 | 4.06 | 92.00 | 98.90 | 153.47 | 85899.79 |
|              | 2008 | 69.68 | 60.72 | 8.97 | 3385.35 | 169.65 | 5.13 | 67.82 | 12.47 | 81.61 | 4.19 | 0.94 | 23.28 | 10.63 | 4.01 | 91.80 | 99.00 | 147.59 | 85942.93 |
|              | 2009 | 67.86 | 59.23 | 8.63 | 3442.87 | 145.05 | 4.67 | 67.82 | 13.99 | 79.36 | 3.71 | 0.96 | 23.34 | 10.49 | 3.96 | 91.70 | 99.10 | 147.55 | 86014.78 |
|              | 2010 | 69.82 | 60.81 | 9.01 | 3548.07 | 163.44 | 4.59 | 67.82 | 13.27 | 80.43 | 3.69 | 0.90 | 23.39 | 10.32 | 3.91 | 91.60 | 99.20 | 151.93 | 86091.40 |
|              | 2011 | 69.91 | 60.88 | 9.04 | 3631.54 | 171.63 | 4.06 | 67.82 | 13.98 | 79.39 | 3.22 | 0.84 | 23.44 | 10.32 | 3.86 | 91.40 | 99.30 | 155.29 | 86207.20 |
|              | 2012 | 70.00 | 60.94 | 9.06 | 3650.82 | 196.87 | 4.51 | 67.82 | 13.09 | 80.70 | 3.64 | 0.87 | 23.50 | 10.32 | 3.82 | 91.30 | 99.40 | -      | 86351.22 |
|              | 2013 | 70.08 | 61.00 | 9.09 | 3524.23 | 205.21 | 4.98 | 67.82 | 12.63 | 81.37 | 4.06 | 0.93 | 23.56 | 10.30 | 3.77 | 91.10 | 99.50 | -      | 86517.08 |
|              | 2014 | 70.17 | 61.06 | 9.11 | 3581.84 | 212.98 | 5.18 | 67.82 | 11.94 | 82.40 | 4.27 | 0.91 | 23.63 | 10.27 | 3.72 | 91.00 | 99.60 | -      | 86693.69 |
|              | 2015 | 70.27 | 61.13 | 9.14 | 3694.46 | -      | -    | -     | -     | -     | -    | -    | 23.71 | 10.20 | 3.68 | 91.00 | 99.60 | -      | 86901.93 |
|              | 2016 | 70.39 | 61.22 | 9.17 | 3792.29 | -      | -    | -     | -     | -     | -    | -    | 23.80 | 10.11 | -    | -     | -     | -      | 87122.26 |
|              | 2017 | 71.77 | 62.30 | 9.47 | -       | -      | -    | -     | -     | -     | -    | -    | -     | -     | -    | -     | -     | -      | -        |
| Trinidad and | 1995 | 69.23 | 60.66 | 8.57 | 6869.50 | 216.49 | 5.10 | 87.21 | 42.08 | 51.75 | 2.64 | 2.46 | 9.62  | 9.62  | 1.96 | 90.30 | 92.50 | -      | 91628.62 |
| Tobago       | 1996 | 69.21 | 60.66 | 8.55 | 7339.93 | 216.61 | 4.73 | 86.28 | 42.77 | 50.43 | 2.39 | 2.35 | 9.85  | 9.65  | 1.90 | 90.40 | 92.60 | -      | 91681.76 |

|      |       |       |      |          |         |      |       |       |       |      |      |       |       |      |       |       |          |          |
|------|-------|-------|------|----------|---------|------|-------|-------|-------|------|------|-------|-------|------|-------|-------|----------|----------|
| 1997 | 69.34 | 60.75 | 8.59 | 7877.62  | 208.33  | 4.58 | 86.34 | 42.12 | 51.22 | 2.34 | 2.23 | 10.09 | 9.64  | 1.84 | 90.50 | 92.80 | -        | 91757.69 |
| 1998 | 69.46 | 60.83 | 8.63 | 8505.07  | 200.08  | 4.18 | 86.35 | 46.01 | 46.72 | 1.95 | 2.23 | 10.33 | 9.62  | 1.80 | 90.50 | 93.00 | 21180.01 | 91821.38 |
| 1999 | 69.24 | 60.64 | 8.59 | 9171.36  | 253.42  | 4.71 | 86.91 | 43.62 | 49.81 | 2.34 | 2.36 | 10.58 | 9.61  | 1.77 | 90.60 | 93.10 | 22878.23 | 91915.43 |
| 2000 | 69.41 | 60.76 | 8.65 | 9779.50  | 268.01  | 4.17 | 86.32 | 45.81 | 46.92 | 1.96 | 2.21 | 10.78 | 9.62  | 1.75 | 90.70 | 93.30 | 24111.81 | 92007.37 |
| 2001 | 69.66 | 60.95 | 8.71 | 10151.96 | 305.05  | 4.40 | 86.31 | 42.61 | 50.63 | 2.23 | 2.17 | 10.60 | 9.69  | 1.74 | 90.80 | 93.50 | 25251.93 | 92068.43 |
| 2002 | 69.92 | 61.16 | 8.77 | 10910.90 | 352.32  | 5.00 | 86.91 | 40.88 | 52.96 | 2.65 | 2.35 | 10.42 | 9.77  | 1.74 | 90.80 | 93.60 | -        | 92143.85 |
| 2003 | 70.40 | 61.51 | 8.89 | 12426.15 | 448.51  | 5.13 | 90.04 | 44.36 | 50.73 | 2.60 | 2.53 | 10.24 | 9.88  | 1.75 | 90.90 | 93.80 | 31439.72 | 92225.88 |
| 2004 | 70.97 | 61.94 | 9.03 | 13346.59 | 521.58  | 5.22 | 90.14 | 45.28 | 49.76 | 2.60 | 2.62 | 10.07 | 10.03 | 1.76 | 91.00 | 94.00 | 38415.06 | 92298.44 |
| 2005 | 71.25 | 62.14 | 9.11 | 14105.34 | 654.40  | 5.31 | 82.75 | 41.58 | 49.75 | 2.64 | 2.67 | 9.90  | 10.20 | 1.77 | 91.10 | 94.10 | 43922.04 | 92363.77 |
| 2006 | 71.56 | 62.40 | 9.16 | 15892.29 | 632.88  | 4.49 | 82.58 | 41.53 | 49.71 | 2.23 | 2.26 | 9.74  | 10.44 | 1.78 | 91.10 | 94.30 | 52004.72 | 92382.15 |
| 2007 | 71.97 | 62.70 | 9.27 | 16570.07 | 797.26  | 4.82 | 81.67 | 49.25 | 49.25 | 2.38 | 2.45 | 9.57  | 10.71 | 1.79 | 91.20 | 94.50 | 51308.10 | 92414.62 |
| 2008 | 72.21 | 62.88 | 9.33 | 17052.26 | 931.88  | 4.40 | 81.32 | 41.30 | 49.21 | 2.16 | 2.23 | 9.41  | 11.01 | 1.80 | 91.30 | 94.60 | 54553.47 | 92462.03 |
| 2009 | 72.39 | 63.00 | 9.39 | 16226.51 | 938.84  | 6.47 | 83.38 | 41.11 | 50.70 | 3.28 | 3.19 | 9.25  | 11.33 | 1.80 | 91.40 | 94.80 | 54882.34 | 92532.25 |
| 2010 | 72.43 | 63.04 | 9.40 | 16683.95 | 818.94  | 5.29 | 81.26 | 34.86 | 57.11 | 3.02 | 2.27 | 9.09  | 11.68 | 1.81 | 91.40 | 95.00 | 58068.76 | 92663.39 |
| 2011 | 72.53 | 63.11 | 9.42 | 16551.49 | 891.80  | 5.06 | 79.66 | 37.44 | 53.01 | 2.68 | 2.38 | 8.94  | 12.01 | 1.80 | 91.50 | 95.10 | 59776.58 | 92701.48 |
| 2012 | 72.66 | 63.21 | 9.45 | 16680.68 | 1000.98 | 5.78 | 81.32 | 40.61 | 50.07 | 2.89 | 2.89 | 8.80  | 12.35 | 1.80 | 91.50 | 95.10 | 61308.53 | 92773.67 |
| 2013 | 72.77 | 63.30 | 9.47 | 17038.79 | 1084.36 | 5.98 | 81.70 | 38.76 | 52.55 | 3.14 | 2.84 | 8.67  | 12.71 | 1.79 | 91.50 | 95.10 | -        | 92844.03 |
| 2014 | 72.86 | 63.37 | 9.49 | 16862.55 | 1136.31 | 5.93 | 81.70 | 37.98 | 53.51 | 3.17 | 2.76 | 8.55  | 13.08 | 1.78 | 91.50 | 95.10 | -        | 92919.19 |
| 2015 | 72.94 | 63.43 | 9.51 | 16695.98 | -       | -    | -     | -     | -     | -    | -    | 8.45  | 13.48 | 1.77 | 91.50 | 95.10 | -        | 93002.75 |
| 2016 | 73.02 | 63.51 | 9.51 | 16259.04 | -       | -    | -     | -     | -     | -    | -    | 8.35  | 13.96 | -    | -     | -     | -        | 93091.60 |
| 2017 | 74.24 | 64.99 | 9.26 | -        | -       | -    | -     | -     | -     | -    | -    | -     | -     | -    | -     | -     | -        | -        |

|         |      |       |       |       |         |        |      |       |       |       |      |      |       |       |      |       |       |          |          |
|---------|------|-------|-------|-------|---------|--------|------|-------|-------|-------|------|------|-------|-------|------|-------|-------|----------|----------|
| Tunisia | 1995 | 72.80 | 62.69 | 10.11 | 2432.31 | 127.26 | 5.86 | 80.12 | 40.54 | 49.40 | 2.89 | 2.96 | 61.47 | 9.17  | 2.61 | 77.80 | 86.50 | 24746.42 | 90228.32 |
|         | 1996 | 73.34 | 63.13 | 10.21 | 2566.13 | 126.17 | 5.43 | 85.05 | 38.27 | 55.01 | 2.99 | 2.44 | 61.87 | 9.44  | 2.49 | 78.60 | 87.20 | 26068.71 | 90372.95 |
|         | 1997 | 73.85 | 63.53 | 10.31 | 2668.81 | 113.60 | 5.14 | 85.26 | 40.46 | 52.54 | 2.70 | 2.44 | 62.26 | 9.74  | 2.38 | 79.40 | 87.90 | 26847.33 | 90517.88 |
|         | 1998 | 74.26 | 63.86 | 10.39 | 2762.55 | 123.90 | 5.40 | 84.98 | 39.02 | 54.08 | 2.92 | 2.48 | 62.65 | 10.05 | 2.29 | 80.30 | 88.60 | 28144.02 | 90685.58 |
|         | 1999 | 74.60 | 64.14 | 10.46 | 2897.98 | 129.61 | 5.43 | 83.48 | 38.88 | 53.43 | 2.90 | 2.53 | 63.04 | 10.33 | 2.21 | 81.10 | 89.20 | 29463.86 | 90851.87 |
|         | 2000 | 74.87 | 64.37 | 10.50 | 3004.61 | 119.46 | 5.40 | 80.11 | 36.14 | 54.89 | 2.96 | 2.43 | 63.43 | 10.56 | 2.14 | 81.90 | 89.90 | 30799.83 | 91014.09 |
|         | 2001 | 75.13 | 64.58 | 10.55 | 3091.10 | 119.30 | 5.29 | 80.13 | 37.20 | 53.57 | 2.83 | 2.46 | 63.82 | 10.71 | 2.09 | 82.70 | 90.50 | 31281.86 | 91134.50 |
|         | 2002 | 75.33 | 64.75 | 10.58 | 3107.02 | 124.79 | 5.32 | 80.17 | 37.95 | 52.66 | 2.80 | 2.52 | 64.20 | 10.83 | 2.05 | 83.40 | 91.10 | 31568.35 | 91274.49 |

|        |       |       |       |         |          |        |       |        |       |       |      |       |       |       |       |       |          |           |          |
|--------|-------|-------|-------|---------|----------|--------|-------|--------|-------|-------|------|-------|-------|-------|-------|-------|----------|-----------|----------|
| 2003   | 75.50 | 64.90 | 10.60 | 3228.46 | 147.99   | 5.36   | 80.17 | 37.77  | 52.88 | 2.83  | 2.52 | 64.59 | 10.91 | 2.02  | 84.20 | 91.80 | 31530.91 | 91386.03  |          |
| 2004   | 75.76 | 65.13 | 10.63 | 3403.11 | 175.12   | 5.63   | 83.49 | 40.25  | 51.80 | 2.91  | 2.71 | 64.93 | 10.97 | 2.00  | 85.00 | 92.40 | 32529.08 | 91486.12  |          |
| 2005   | 75.98 | 65.32 | 10.66 | 3492.17 | 177.84   | 5.57   | 84.16 | 40.83  | 51.48 | 2.87  | 2.70 | 65.10 | 11.01 | 1.99  | 85.60 | 92.90 | 32172.82 | 91583.10  |          |
| 2006   | 76.17 | 65.48 | 10.69 | 3641.54 | 190.30   | 5.64   | 85.54 | 40.76  | 52.35 | 2.96  | 2.69 | 65.27 | 10.97 | 2.00  | 86.30 | 93.50 | 33238.04 | 91618.67  |          |
| 2007   | 76.35 | 65.59 | 10.76 | 3847.41 | 213.16   | 5.64   | 86.81 | 52.33  | 52.33 | 2.95  | 2.69 | 65.43 | 10.92 | 2.02  | 87.00 | 94.10 | 33570.52 | 91648.86  |          |
| 2008   | 76.54 | 65.73 | 10.81 | 3968.35 | 242.57   | 5.63   | 86.88 | 39.93  | 54.04 | 3.04  | 2.59 | 65.60 | 10.88 | 2.06  | 87.70 | 94.70 | 35101.99 | 91677.73  |          |
| 2009   | 76.68 | 65.84 | 10.84 | 4044.63 | 255.40   | 6.18   | 86.68 | 37.52  | 56.72 | 3.51  | 2.68 | 65.77 | 10.83 | 2.10  | 88.30 | 95.20 | 35556.61 | 91714.81  |          |
| 2010   | 76.84 | 65.99 | 10.85 | 4140.15 | 270.94   | 6.54   | 86.52 | 35.89  | 58.52 | 3.83  | 2.71 | 65.93 | 10.80 | 2.14  | 89.00 | 95.80 | 37649.97 | 91754.38  |          |
| 2011   | 76.91 | 66.02 | 10.88 | 4014.92 | 305.08   | 7.15   | 87.25 | 36.43  | 58.25 | 4.17  | 2.99 | 66.10 | 10.79 | 2.18  | 89.60 | 96.30 | 38741.14 | 91768.16  |          |
| 2012   | 77.07 | 66.17 | 10.90 | 4127.40 | 297.74   | 7.18   | 87.28 | 36.73  | 57.92 | 4.16  | 3.02 | 66.27 | 10.77 | 2.21  | 90.30 | 96.90 | 39721.01 | 91806.82  |          |
| 2013   | 77.18 | 66.28 | 10.90 | 4196.75 | 309.47   | 7.26   | 87.06 | 36.37  | 58.22 | 4.23  | 3.04 | 66.46 | 10.79 | 2.23  | 90.90 | 97.30 | -        | 91867.31  |          |
| 2014   | 77.27 | 66.37 | 10.90 | 4265.15 | 305.31   | 7.00   | 87.06 | 37.73  | 56.67 | 3.97  | 3.04 | 66.65 | 10.88 | 2.23  | 91.60 | 97.70 | -        | 91950.97  |          |
| 2015   | 77.33 | 66.43 | 10.90 | 4264.52 | -        | -      | -     | -      | -     | -     | -    | 66.84 | 11.08 | 2.22  | 91.60 | 97.70 | -        | 92052.50  |          |
| 2016   | 77.46 | 66.61 | 10.85 | 4265.37 | -        | -      | -     | -      | -     | -     | -    | 67.05 | 11.38 | -     | -     | -     | -        | 92155.51  |          |
| 2017   | 78.33 | 67.31 | 11.02 | -       | -        | -      | -     | -      | -     | -     | -    | -     | -     | -     | -     | -     | -        | -         |          |
| Turkey | 1995  | 70.82 | 60.55 | 10.28   | 7315.18  | 96.22  | 2.51  | 100.00 | 29.68 | 70.32 | 1.76 | 0.74  | 62.12 | 8.44  | 2.76  | 85.50 | 89.20    | 261203.42 | 89791.53 |
|        | 1996  | 71.34 | 61.00 | 10.34   | 7731.17  | 117.55 | 2.90  | 100.00 | 30.84 | 69.16 | 2.01 | 0.90  | 62.65 | 8.67  | 2.71  | 86.00 | 89.90    | 278000.49 | 89859.61 |
|        | 1997  | 71.85 | 61.44 | 10.41   | 8186.24  | 130.79 | 3.13  | 99.56  | 28.26 | 71.61 | 2.24 | 0.89  | 63.18 | 8.93  | 2.66  | 86.60 | 90.60    | 289681.10 | 89949.30 |
|        | 1998  | 72.56 | 62.02 | 10.54   | 8244.50  | 155.89 | 3.59  | 99.59  | 27.96 | 71.93 | 2.58 | 1.01  | 63.70 | 9.18  | 2.61  | 87.10 | 91.20    | 295884.83 | 90045.88 |
|        | 1999  | 71.91 | 61.54 | 10.36   | 7842.59  | 189.19 | 4.77  | 74.81  | 29.08 | 61.13 | 2.91 | 1.85  | 64.22 | 9.42  | 2.56  | 87.60 | 91.90    | 295553.27 | 90160.09 |
|        | 2000  | 74.05 | 63.25 | 10.80   | 8237.34  | 206.75 | 4.95  | 74.57  | 27.65 | 62.93 | 3.11 | 1.83  | 64.74 | 9.62  | 2.50  | 88.10 | 92.60    | 316464.84 | 90293.87 |
|        | 2001  | 74.74 | 63.78 | 10.97   | 7631.40  | 156.34 | 5.16  | 71.55  | 22.85 | 68.07 | 3.51 | 1.65  | 65.33 | 9.80  | 2.45  | 88.60 | 93.20    | 297564.11 | 90343.33 |
|        | 2002  | 75.35 | 64.28 | 11.08   | 8003.48  | 189.96 | 5.36  | 67.68  | 19.84 | 70.68 | 3.79 | 1.57  | 65.95 | 9.95  | 2.40  | 89.10 | 93.80    | 310061.15 | 90416.51 |
|        | 2003  | 75.44 | 64.39 | 11.05   | 8331.76  | 243.47 | 5.34  | 65.75  | 18.46 | 71.92 | 3.84 | 1.50  | 66.57 | 10.07 | 2.35  | 89.70 | 94.50    | 323781.17 | 90488.77 |
|        | 2004  | 76.25 | 65.03 | 11.23   | 9009.59  | 312.93 | 5.37  | 66.91  | 19.24 | 71.25 | 3.83 | 1.54  | 67.18 | 10.20 | 2.31  | 90.10 | 95.10    | 333497.62 | 90556.36 |
|        | 2005  | 76.66 | 65.42 | 11.24   | 9691.82  | 386.19 | 5.45  | 70.78  | 22.76 | 67.84 | 3.70 | 1.75  | 67.78 | 10.32 | 2.27  | 90.60 | 95.70    | 347595.11 | 90630.88 |
|        | 2006  | 77.25 | 65.91 | 11.34   | 10251.05 | 447.24 | 5.81  | 69.40  | 21.97 | 68.34 | 3.97 | 1.84  | 68.38 | 10.44 | 2.24  | 91.10 | 96.30    | 377156.06 | 90623.23 |
|        | 2007  | 78.17 | 66.54 | 11.63   | 10637.72 | 559.69 | 6.04  | 67.82  | 67.83 | 67.83 | 4.10 | 1.94  | 68.98 | 10.56 | 2.21  | 91.60 | 96.90    | 406298.25 | 90620.45 |
|        | 2008  | 78.82 | 67.04 | 11.78   | 10599.29 | 627.89 | 6.07  | 64.41  | 17.38 | 73.02 | 4.44 | 1.64  | 69.56 | 10.68 | 2.19  | 92.00 | 97.50    | 399181.90 | 90618.25 |

|             |      |       |       |       |          |        |      |        |       |       |      |      |       |       |      |       |        |           |          |
|-------------|------|-------|-------|-------|----------|--------|------|--------|-------|-------|------|------|-------|-------|------|-------|--------|-----------|----------|
|             | 2009 | 78.19 | 66.61 | 11.58 | 9973.34  | 522.03 | 6.08 | 73.88  | 14.06 | 80.97 | 4.92 | 1.16 | 70.14 | 10.81 | 2.17 | 92.50 | 98.00  | 404636.72 | 90662.62 |
|             | 2010 | 78.27 | 66.77 | 11.50 | 10672.05 | 565.87 | 5.61 | 76.25  | 16.31 | 78.61 | 4.41 | 1.20 | 70.72 | 10.95 | 2.16 | 92.90 | 98.60  | 422721.87 | 90697.39 |
|             | 2011 | 78.30 | 66.74 | 11.56 | 11683.23 | 557.47 | 5.29 | 75.49  | 15.44 | 79.55 | 4.21 | 1.08 | 71.28 | 11.06 | 2.14 | 93.30 | 99.10  | 434798.46 | 90768.69 |
|             | 2012 | 78.66 | 67.03 | 11.63 | 12052.33 | 555.06 | 5.24 | 76.28  | 15.84 | 79.24 | 4.15 | 1.09 | 71.83 | 11.19 | 2.12 | 93.70 | 99.50  | 445640.08 | 90865.40 |
|             | 2013 | 78.51 | 66.96 | 11.55 | 12865.68 | 588.20 | 5.38 | 77.94  | 16.77 | 78.48 | 4.23 | 1.16 | 72.37 | 11.33 | 2.11 | 94.10 | 99.80  | -         | 90967.47 |
|             | 2014 | 78.83 | 67.23 | 11.61 | 13312.02 | 567.63 | 5.41 | 78.71  | 17.75 | 77.45 | 4.19 | 1.22 | 72.89 | 11.50 | 2.09 | 94.50 | 100.00 | -         | 91083.25 |
|             | 2015 | 79.02 | 67.39 | 11.63 | 13898.30 | -      | -    | -      | -     | -     | -    | -    | 73.40 | 11.71 | 2.07 | 94.90 | 100.00 | -         | 91216.77 |
|             | 2016 | 79.16 | 67.60 | 11.56 | 14116.98 | -      | -    | -      | -     | -     | -    | -    | 73.89 | 11.93 | -    | -     | -      | -         | 91388.54 |
|             | 2017 | 78.94 | 67.88 | 11.06 | -        | -      | -    | -      | -     | -     | -    | -    | -     | -     | -    | -     | -      | -         | -        |
| Turkmenista | 1995 | 63.10 | 55.86 | 7.23  | 2054.28  | 43.02  | 3.07 | 100.00 | 39.50 | 60.50 | 1.86 | 1.21 | 44.79 | 7.27  | 3.51 | 62.00 | 59.00  | 55244.04  | 87842.52 |
|             | 1996 | 63.03 | 55.85 | 7.18  | 2151.27  | 17.47  | 3.13 | 100.00 | 27.83 | 72.17 | 2.26 | 0.87 | 45.02 | 7.31  | 3.32 | 62.10 | 59.10  | 51096.43  | 88018.07 |
|             | 1997 | 62.98 | 55.83 | 7.15  | 1876.37  | 30.67  | 4.96 | 100.00 | 29.85 | 70.15 | 3.48 | 1.48 | 45.24 | 7.29  | 3.15 | 62.10 | 59.30  | 45884.63  | 88216.96 |
|             | 1998 | 63.06 | 55.92 | 7.15  | 1983.02  | 32.75  | 5.03 | 100.00 | 30.40 | 69.60 | 3.50 | 1.53 | 45.47 | 7.24  | 3.01 | 62.20 | 59.40  | 45828.87  | 88424.24 |
|             | 1999 | 63.25 | 56.08 | 7.17  | 2282.98  | 33.65  | 3.88 | 100.00 | 38.54 | 61.46 | 2.39 | 1.50 | 45.69 | 7.20  | 2.90 | 62.30 | 59.50  | 55973.71  | 88625.78 |
|             | 2000 | 63.62 | 56.38 | 7.24  | 2381.18  | 43.98  | 3.94 | 100.00 | 18.46 | 81.54 | 3.21 | 0.73 | 45.91 | 7.20  | 2.82 | 62.30 | 59.60  | 63236.16  | 88825.06 |
|             | 2001 | 63.93 | 56.67 | 7.26  | 2458.51  | 58.98  | 3.87 | 100.00 | 27.22 | 72.78 | 2.82 | 1.05 | 46.14 | 7.28  | 2.77 | 62.40 | 59.70  | 66916.35  | 88921.30 |
|             | 2002 | 64.21 | 56.91 | 7.30  | 2440.28  | 63.12  | 3.34 | 100.00 | 27.15 | 72.85 | 2.43 | 0.91 | 46.36 | 7.37  | 2.73 | 62.40 | 59.90  | 70833.49  | 89020.90 |
|             | 2003 | 64.51 | 57.17 | 7.33  | 2495.29  | 94.71  | 3.85 | 100.00 | 29.71 | 70.29 | 2.71 | 1.14 | 46.59 | 7.45  | 2.70 | 62.50 | 60.00  | 80037.23  | 89109.67 |
|             | 2004 | 64.83 | 57.45 | 7.38  | 2593.52  | 121.91 | 4.03 | 100.00 | 39.97 | 60.03 | 2.42 | 1.61 | 46.81 | 7.43  | 2.67 | 62.60 | 60.10  | 76966.67  | 89203.77 |
|             | 2005 | 65.26 | 57.81 | 7.45  | 2900.12  | 126.98 | 3.51 | 100.00 | 42.42 | 57.58 | 2.02 | 1.49 | 47.05 | 7.31  | 2.65 | 62.60 | 60.20  | 79175.65  | 89271.96 |
|             | 2006 | 65.76 | 58.25 | 7.51  | 3181.07  | 129.34 | 2.90 | 100.00 | 46.76 | 53.24 | 1.55 | 1.36 | 47.30 | 7.15  | 2.65 | 62.70 | 60.40  | 81028.32  | 89241.49 |
|             | 2007 | 66.29 | 58.69 | 7.60  | 3489.33  | 115.35 | 2.16 | 100.00 | 64.31 | 64.31 | 1.39 | 0.77 | 47.56 | 6.91  | 2.67 | -     | -      | 86686.09  | 89212.05 |
|             | 2008 | 66.81 | 59.13 | 7.68  | 3949.05  | 83.60  | 1.93 | 100.00 | 50.82 | 49.18 | 0.95 | 0.98 | 47.83 | 6.65  | 2.71 | -     | -      | 91468.98  | 89162.90 |
|             | 2009 | 67.39 | 59.61 | 7.78  | 4129.54  | 76.40  | 1.88 | 100.00 | 38.19 | 61.81 | 1.16 | 0.72 | 48.11 | 6.42  | 2.77 | -     | -      | 80016.14  | 89114.10 |
|             | 2010 | 67.91 | 60.06 | 7.85  | 4439.20  | 87.29  | 1.99 | 100.00 | 38.43 | 61.57 | 1.22 | 0.76 | 48.40 | 6.24  | 2.83 | -     | -      | 87379.67  | 89076.01 |
|             | 2011 | 68.37 | 60.45 | 7.92  | 5006.30  | 113.41 | 1.98 | 100.00 | 35.99 | 64.01 | 1.27 | 0.71 | 48.71 | 6.15  | 2.89 | -     | -      | 88648.72  | 88998.06 |
|             | 2012 | 68.83 | 60.84 | 7.99  | 5462.98  | 133.36 | 1.96 | 100.00 | 35.09 | 64.91 | 1.27 | 0.69 | 49.02 | 6.10  | 2.94 | -     | -      | 92178.07  | 88934.67 |
|             | 2013 | 69.19 | 61.15 | 8.04  | 5909.77  | 165.98 | 2.12 | 100.00 | 32.76 | 67.24 | 1.43 | 0.69 | 49.35 | 6.10  | 2.96 | -     | -      | -         | 88879.80 |
|             | 2014 | 69.57 | 61.47 | 8.11  | 6399.27  | 186.72 | 2.07 | 100.00 | 34.77 | 65.23 | 1.35 | 0.72 | 49.69 | 6.14  | 2.96 | -     | -      | -         | 88852.94 |

|         |      |       |       |      |         |       |       |       |       |       |      |      |       |       |      |       |       |           |          |
|---------|------|-------|-------|------|---------|-------|-------|-------|-------|-------|------|------|-------|-------|------|-------|-------|-----------|----------|
|         | 2015 | 69.91 | 61.75 | 8.16 | 6693.94 | -     | -     | -     | -     | -     | -    | -    | 50.04 | 6.22  | 2.93 | -     | -     | -         | 88835.30 |
|         | 2016 | 70.24 | 62.06 | 8.18 | 6986.86 | -     | -     | -     | -     | -     | -    | -    | 50.40 | 6.40  | -    | -     | -     | -         | 88837.12 |
|         | 2017 | 70.10 | 61.67 | 8.43 | -       | -     | -     | -     | -     | -     | -    | -    | -     | -     | -    | -     | -     | -         | -        |
| Uganda  | 1995 | 46.86 | 40.63 | 6.22 | 359.76  | 18.41 | 5.69  | 61.23 | 45.95 | 24.94 | 1.42 | 4.27 | 11.66 | 5.48  | 7.02 | 14.40 | 48.40 | 38761.04  | 88297.86 |
|         | 1996 | 46.90 | 40.73 | 6.17 | 380.34  | 19.16 | 5.67  | 61.23 | 45.97 | 24.91 | 1.41 | 4.26 | 11.75 | 5.52  | 6.99 | 14.60 | 50.00 | 38939.18  | 88114.35 |
|         | 1997 | 47.30 | 41.08 | 6.22 | 387.60  | 19.89 | 5.56  | 61.22 | 45.43 | 25.79 | 1.43 | 4.13 | 11.83 | 5.55  | 6.97 | 14.90 | 51.60 | 39732.04  | 87953.46 |
|         | 1998 | 47.63 | 41.36 | 6.27 | 394.25  | 19.79 | 6.20  | 61.55 | 42.73 | 30.57 | 1.90 | 4.31 | 11.91 | 5.55  | 6.94 | 15.10 | 53.20 | 85877.49  | 87791.13 |
|         | 1999 | 48.18 | 41.82 | 6.36 | 412.80  | 18.56 | 6.18  | 56.71 | 41.49 | 26.85 | 1.66 | 4.52 | 12.00 | 5.51  | 6.90 | 15.30 | 54.80 | 58912.74  | 87653.36 |
|         | 2000 | 48.66 | 42.22 | 6.44 | 412.20  | 19.02 | 6.77  | 51.80 | 37.75 | 27.14 | 1.84 | 4.94 | 12.08 | 5.43  | 6.87 | 15.60 | 56.40 | 72771.09  | 87510.79 |
|         | 2001 | 49.39 | 42.89 | 6.50 | 419.34  | 20.53 | 7.26  | 47.27 | 34.38 | 27.27 | 1.98 | 5.28 | 12.17 | 5.36  | 6.82 | 15.80 | 58.00 | 57992.59  | 87526.00 |
|         | 2002 | 50.13 | 43.56 | 6.57 | 440.65  | 22.40 | 7.78  | 43.98 | 32.08 | 27.05 | 2.11 | 5.68 | 12.25 | 5.26  | 6.77 | 16.00 | 59.60 | 59822.89  | 87532.12 |
|         | 2003 | 50.89 | 44.24 | 6.65 | 453.20  | 22.17 | 7.54  | 41.48 | 30.76 | 25.85 | 1.95 | 5.59 | 12.48 | 5.15  | 6.72 | 16.30 | 61.20 | 89594.61  | 87576.14 |
|         | 2004 | 51.73 | 44.99 | 6.74 | 467.48  | 30.28 | 8.90  | 48.23 | 35.95 | 25.47 | 2.27 | 6.63 | 12.76 | 5.03  | 6.65 | 16.50 | 62.80 | 70139.65  | 87600.13 |
|         | 2005 | 52.79 | 45.88 | 6.91 | 480.10  | 36.67 | 9.36  | 52.41 | 39.19 | 25.23 | 2.36 | 7.00 | 13.03 | 4.93  | 6.58 | 16.80 | 64.50 | 111346.72 | 87642.95 |
|         | 2006 | 53.69 | 46.70 | 6.99 | 513.75  | 40.97 | 9.86  | 55.25 | 41.40 | 25.07 | 2.47 | 7.39 | 13.31 | 4.87  | 6.51 | 17.00 | 66.10 | 40779.02  | 87738.39 |
|         | 2007 | 54.31 | 47.28 | 7.03 | 538.04  | 48.25 | 9.76  | 56.69 | 25.22 | 25.22 | 2.46 | 7.30 | 13.60 | 4.82  | 6.42 | 17.30 | 67.70 | 104200.61 | 87838.59 |
|         | 2008 | 55.09 | 47.98 | 7.11 | 565.07  | 52.68 | 9.10  | 57.81 | 43.19 | 25.29 | 2.30 | 6.80 | 13.89 | 4.77  | 6.34 | 17.50 | 69.30 | 89206.67  | 87959.90 |
|         | 2009 | 56.01 | 48.79 | 7.22 | 583.10  | 49.68 | 8.43  | 53.90 | 42.30 | 21.52 | 1.81 | 6.62 | 14.19 | 4.72  | 6.25 | 17.80 | 70.90 | 52830.35  | 88097.98 |
|         | 2010 | 56.79 | 49.47 | 7.32 | 595.21  | 65.33 | 11.02 | 45.34 | 32.52 | 28.28 | 3.12 | 7.91 | 14.49 | 4.65  | 6.15 | 18.00 | 72.50 | 79906.21  | 88246.23 |
|         | 2011 | 57.65 | 50.30 | 7.35 | 629.24  | 57.95 | 9.09  | 49.91 | 35.45 | 28.97 | 2.63 | 6.46 | 14.80 | 4.60  | 6.06 | 18.30 | 74.20 | 80318.97  | 88207.39 |
|         | 2012 | 58.60 | 51.19 | 7.42 | 631.56  | 52.79 | 7.58  | 61.36 | 43.93 | 28.40 | 2.15 | 5.43 | 15.12 | 4.55  | 5.96 | 18.50 | 75.80 | 80725.08  | 88182.34 |
|         | 2013 | 59.70 | 52.16 | 7.54 | 632.49  | 52.03 | 7.47  | 54.57 | 39.32 | 27.94 | 2.09 | 5.39 | 15.44 | 4.49  | 5.87 | 18.80 | 77.40 | -         | 88169.55 |
|         | 2014 | 60.69 | 53.02 | 7.66 | 642.88  | 52.29 | 7.22  | 54.57 | 40.96 | 24.94 | 1.80 | 5.42 | 15.77 | 4.44  | 5.78 | 19.00 | 78.90 | -         | 88157.26 |
|         | 2015 | 61.59 | 53.80 | 7.79 | 654.14  | -     | -     | -     | -     | -     | -    | -    | 16.10 | 4.38  | 5.68 | 19.10 | 79.00 | -         | 88165.14 |
|         | 2016 | 62.20 | 54.35 | 7.86 | 662.43  | -     | -     | -     | -     | -     | -    | -    | 16.44 | 4.36  | -    | -     | -     | -         | 88158.76 |
|         | 2017 | 65.71 | 56.96 | 8.74 | -       | -     | -     | -     | -     | -     | -    | -    | -     | -     | -    | -     | -     | -         | -        |
| Ukraine | 1995 | 66.53 | 58.36 | 8.16 | 1917.45 | 51.05 | 7.01  | 89.26 | 24.46 | 72.59 | 5.09 | 1.92 | 66.95 | 20.32 | 1.40 | 94.50 | 97.50 | 598434.25 | 91976.94 |
|         | 1996 | 66.71 | 58.54 | 8.18 | 1741.09 | 60.47 | 6.85  | 89.19 | 26.85 | 69.90 | 4.79 | 2.06 | 66.99 | 20.47 | 1.33 | 94.50 | 97.50 | 533868.64 | 92119.56 |
|         | 1997 | 67.32 | 59.02 | 8.30 | 1704.31 | 68.61 | 6.85  | 91.52 | 35.52 | 61.19 | 4.19 | 2.66 | 67.03 | 20.31 | 1.27 | 94.50 | 97.50 | 514547.65 | 92288.92 |

|      |       |       |      |         |        |      |       |       |       |      |      |       |       |      |       |       |           |          |
|------|-------|-------|------|---------|--------|------|-------|-------|-------|------|------|-------|-------|------|-------|-------|-----------|----------|
| 1998 | 68.10 | 59.63 | 8.47 | 1686.94 | 55.71  | 6.60 | 92.60 | 42.96 | 53.60 | 3.54 | 3.06 | 67.07 | 20.03 | 1.21 | 94.50 | 97.50 | 485491.77 | 92459.34 |
| 1999 | 67.70 | 59.33 | 8.37 | 1699.52 | 37.82  | 5.89 | 92.23 | 46.18 | 49.93 | 2.94 | 2.95 | 67.11 | 19.88 | 1.12 | 94.60 | 97.60 | 483347.22 | 92642.27 |
| 2000 | 67.35 | 59.05 | 8.30 | 1818.00 | 35.84  | 5.59 | 91.41 | 44.05 | 51.81 | 2.90 | 2.69 | 67.15 | 19.98 | 1.11 | 94.70 | 97.60 | 470107.96 | 92824.33 |
| 2001 | 67.57 | 59.25 | 8.32 | 2005.32 | 44.55  | 5.66 | 91.46 | 41.78 | 54.32 | 3.07 | 2.58 | 67.18 | 20.52 | 1.09 | 94.70 | 97.50 | 459965.89 | 92878.88 |
| 2002 | 67.67 | 59.34 | 8.32 | 2130.66 | 55.33  | 6.25 | 92.19 | 40.37 | 56.21 | 3.51 | 2.74 | 67.28 | 21.28 | 1.13 | 94.80 | 97.40 | 462724.22 | 92923.62 |
| 2003 | 67.67 | 59.37 | 8.31 | 2349.93 | 73.19  | 6.93 | 92.82 | 38.70 | 58.30 | 4.04 | 2.89 | 67.43 | 22.08 | 1.17 | 94.90 | 97.40 | 484337.02 | 92939.51 |
| 2004 | 67.50 | 59.25 | 8.25 | 2654.33 | 91.01  | 6.61 | 93.05 | 38.57 | 58.55 | 3.87 | 2.74 | 67.60 | 22.66 | 1.22 | 95.00 | 97.30 | 457164.88 | 92933.22 |
| 2005 | 67.10 | 58.96 | 8.14 | 2746.05 | 118.31 | 6.41 | 92.49 | 37.50 | 59.46 | 3.81 | 2.60 | 67.79 | 22.87 | 1.21 | 95.10 | 97.20 | 434668.76 | 92921.05 |
| 2006 | 67.82 | 59.53 | 8.29 | 2966.50 | 148.12 | 6.39 | 92.47 | 36.28 | 60.77 | 3.88 | 2.51 | 67.97 | 23.06 | 1.31 | 95.20 | 97.10 | 432631.66 | 92870.37 |
| 2007 | 67.60 | 59.34 | 8.26 | 3220.01 | 196.11 | 6.36 | 90.82 | 61.85 | 61.85 | 3.93 | 2.42 | 68.15 | 22.96 | 1.35 | 95.30 | 97.00 | 444201.66 | 92815.25 |
| 2008 | 67.87 | 59.56 | 8.31 | 3311.96 | 253.62 | 6.63 | 93.15 | 39.44 | 57.66 | 3.83 | 2.81 | 68.33 | 22.73 | 1.46 | 95.40 | 96.90 | 436817.13 | 92749.29 |
| 2009 | 69.61 | 60.91 | 8.70 | 2834.34 | 199.04 | 7.80 | 93.33 | 41.96 | 55.03 | 4.29 | 3.51 | 68.50 | 22.51 | 1.47 | 95.50 | 96.80 | 367349.71 | 92692.24 |
| 2010 | 70.50 | 61.65 | 8.85 | 2965.14 | 233.45 | 7.81 | 93.39 | 40.50 | 56.63 | 4.42 | 3.39 | 68.69 | 22.39 | 1.44 | 95.60 | 96.70 | 393092.06 | 92665.37 |
| 2011 | 71.21 | 62.16 | 9.04 | 3138.47 | 250.58 | 6.98 | 93.64 | 43.64 | 53.40 | 3.73 | 3.25 | 68.88 | 22.42 | 1.46 | 95.70 | 96.60 | 410067.31 | 92623.03 |
| 2012 | 71.20 | 62.18 | 9.02 | 3153.74 | 289.71 | 7.47 | 93.77 | 41.98 | 55.23 | 4.13 | 3.34 | 69.07 | 22.48 | 1.53 | 95.80 | 96.50 | 404900.30 | 92594.47 |
| 2013 | 71.36 | 62.32 | 9.04 | 3160.08 | 311.16 | 7.67 | 93.96 | 43.09 | 54.14 | 4.15 | 3.52 | 69.27 | 22.58 | 1.51 | 95.80 | 96.40 | -         | 92574.95 |
| 2014 | 71.82 | 62.67 | 9.15 | 3123.92 | 202.66 | 7.10 | 93.93 | 46.22 | 50.80 | 3.60 | 3.49 | 69.48 | 22.76 | 1.50 | 95.90 | 96.30 | -         | 92599.44 |
| 2015 | 72.03 | 62.87 | 9.17 | 2828.89 | -      | -    | -     | -     | -     | -    | -    | 69.70 | 23.01 | 1.51 | 95.90 | 96.20 | -         | 92635.14 |
| 2016 | 72.10 | 63.03 | 9.07 | 2905.86 | -      | -    | -     | -     | -     | -    | -    | 69.92 | 23.56 | -    | -     | -     | -         | 92687.66 |
| 2017 | 70.55 | 60.99 | 9.56 | -       | -      | -    | -     | -     | -     | -    | -    | -     | -     | -    | -     | -     | -         | -        |

|             |      |       |       |       |          |        |      |       |       |       |      |      |       |      |      |       |       |           |          |
|-------------|------|-------|-------|-------|----------|--------|------|-------|-------|-------|------|------|-------|------|------|-------|-------|-----------|----------|
| United Arab | 1995 | 73.15 | 62.79 | 10.36 | 61818.23 | 737.42 | 2.64 | 71.00 | 14.93 | 78.97 | 2.08 | 0.55 | 78.32 | 1.47 | 3.42 | 97.40 | 99.70 | 93904.01  | 88613.73 |
| Emirates    | 1996 | 73.33 | 62.96 | 10.37 | 62294.13 | 733.12 | 2.46 | 68.94 | 14.30 | 79.25 | 1.95 | 0.51 | 78.49 | 1.46 | 3.23 | 97.40 | 99.70 | 103034.65 | 88584.24 |
|             | 1997 | 73.51 | 63.13 | 10.38 | 64176.48 | 755.51 | 2.49 | 70.56 | 15.28 | 78.34 | 1.95 | 0.54 | 78.94 | 1.47 | 3.06 | 97.40 | 99.70 | 101901.38 | 88594.79 |
|             | 1998 | 73.85 | 63.42 | 10.43 | 61231.23 | 801.21 | 2.89 | 74.82 | 21.65 | 71.06 | 2.06 | 0.84 | 79.38 | 1.49 | 2.91 | 97.40 | 99.70 | 104993.20 | 88623.00 |
|             | 1999 | 74.04 | 63.59 | 10.46 | 59845.04 | 794.56 | 2.71 | 74.63 | 21.89 | 70.66 | 1.92 | 0.80 | 79.81 | 1.51 | 2.77 | 97.40 | 99.70 | 107207.93 | 88651.69 |
|             | 2000 | 74.33 | 63.84 | 10.49 | 62833.25 | 814.14 | 2.38 | 74.27 | 21.94 | 70.46 | 1.68 | 0.70 | 80.24 | 1.50 | 2.64 | 97.40 | 99.70 | 115420.51 | 88739.41 |
|             | 2001 | 74.56 | 64.02 | 10.54 | 60434.67 | 797.59 | 2.48 | 69.43 | 15.09 | 78.27 | 1.94 | 0.54 | 80.66 | 1.40 | 2.53 | 97.40 | 99.70 | 115018.82 | 88820.64 |
|             | 2002 | 74.82 | 64.23 | 10.59 | 58707.01 | 879.29 | 2.72 | 75.94 | 28.04 | 63.07 | 1.71 | 1.00 | 81.07 | 1.31 | 2.43 | 97.40 | 99.70 | 126800.21 | 88931.85 |
|             | 2003 | 75.21 | 64.53 | 10.68 | 59867.29 | 907.58 | 2.65 | 74.53 | 27.46 | 63.16 | 1.67 | 0.97 | 81.47 | 1.23 | 2.33 | 97.40 | 99.70 | 134091.69 | 89064.05 |

|      |       |       |       |          |         |      |       |       |       |      |      |       |      |      |       |       |           |          |
|------|-------|-------|-------|----------|---------|------|-------|-------|-------|------|------|-------|------|------|-------|-------|-----------|----------|
| 2004 | 75.65 | 64.89 | 10.76 | 60042.60 | 915.42  | 2.46 | 74.41 | 30.41 | 59.14 | 1.46 | 1.01 | 81.87 | 1.18 | 2.24 | 97.50 | 99.70 | 139999.46 | 89238.88 |
| 2005 | 75.96 | 65.19 | 10.77 | 56199.03 | 935.02  | 2.32 | 73.51 | 30.14 | 59.00 | 1.37 | 0.95 | 82.26 | 1.14 | 2.15 | 97.50 | 99.70 | 143367.66 | 89462.58 |
| 2006 | 76.13 | 65.37 | 10.76 | 53926.60 | 998.79  | 2.33 | 73.28 | 29.71 | 59.45 | 1.38 | 0.94 | 82.65 | 1.02 | 2.07 | 97.50 | 99.70 | 151837.32 | 89590.26 |
| 2007 | 76.11 | 65.32 | 10.79 | 48260.01 | 1101.01 | 2.57 | 73.33 | 60.62 | 60.62 | 1.56 | 1.01 | 83.02 | 0.95 | 2.01 | 97.50 | 99.60 | 167986.43 | 89773.60 |
| 2008 | 75.97 | 65.24 | 10.73 | 43658.94 | 1338.93 | 2.93 | 73.11 | 25.14 | 65.62 | 1.92 | 1.01 | 83.38 | 0.90 | 1.95 | 97.50 | 99.60 | 181388.54 | 89947.00 |
| 2009 | 75.79 | 65.13 | 10.66 | 37203.40 | 1332.63 | 4.05 | 64.19 | 16.10 | 74.92 | 3.03 | 1.02 | 83.72 | 0.88 | 1.90 | 97.50 | 99.60 | 182422.17 | 90100.16 |
| 2010 | 75.64 | 65.07 | 10.56 | 35049.15 | 1349.45 | 3.93 | 64.38 | 17.95 | 72.13 | 2.83 | 1.10 | 84.06 | 0.87 | 1.87 | 97.50 | 99.60 | 193127.16 | 90242.48 |
| 2011 | 75.53 | 64.97 | 10.56 | 35550.83 | 1473.34 | 3.70 | 64.38 | 16.88 | 73.77 | 2.73 | 0.97 | 84.38 | 0.95 | 1.84 | 97.50 | 99.60 | 199342.52 | 90250.74 |
| 2012 | 75.47 | 64.94 | 10.53 | 36408.50 | 1433.11 | 3.45 | 64.38 | 16.74 | 74.00 | 2.55 | 0.90 | 84.68 | 1.02 | 1.82 | 97.50 | 99.60 | 204888.72 | 90313.91 |
| 2013 | 75.44 | 64.93 | 10.51 | 38064.00 | 1551.35 | 3.49 | 64.38 | 17.15 | 73.37 | 2.56 | 0.93 | 84.98 | 1.10 | 1.80 | 97.50 | 99.60 | -         | 90409.23 |
| 2014 | 75.42 | 64.93 | 10.49 | 39034.38 | 1610.80 | 3.64 | 64.38 | 17.81 | 72.34 | 2.64 | 1.01 | 85.27 | 1.16 | 1.78 | 97.50 | 99.60 | -         | 90531.98 |
| 2015 | 75.44 | 64.96 | 10.49 | 40159.56 | -       | -    | -     | -     | -     | -    | -    | 85.54 | 1.20 | 1.77 | 97.60 | 99.60 | -         | 90725.02 |
| 2016 | 75.51 | 65.08 | 10.43 | 40864.25 | -       | -    | -     | -     | -     | -    | -    | 85.80 | 1.28 | -    | -     | -     | -         | 90901.52 |
| 2017 | 73.32 | 63.10 | 10.22 | -        | -       | -    | -     | -     | -     | -    | -    | -     | -    | -    | -     | -     | -         | -        |

|                |      |       |       |       |          |         |      |       |       |       |      |      |       |       |      |       |        |           |          |
|----------------|------|-------|-------|-------|----------|---------|------|-------|-------|-------|------|------|-------|-------|------|-------|--------|-----------|----------|
| United Kingdom | 1995 | 76.69 | 66.66 | 10.03 | 30674.61 | 1364.12 | 6.69 | 72.81 | 10.91 | 83.86 | 5.61 | 1.00 | 78.35 | 24.60 | 1.71 | 99.20 | 100.00 | 728336.09 | 91868.82 |
|                | 1996 | 76.91 | 66.85 | 10.06 | 31373.34 | 1436.87 | 6.72 | 68.10 | 10.99 | 82.94 | 5.57 | 1.08 | 78.41 | 24.63 | 1.73 | 99.20 | 100.00 | 744362.82 | 91899.20 |
|                | 1997 | 77.14 | 67.05 | 10.09 | 32556.32 | 1542.68 | 6.49 | 59.81 | 11.75 | 80.36 | 5.22 | 1.28 | 78.47 | 24.61 | 1.72 | 99.20 | 100.00 | 716185.48 | 91935.15 |
|                | 1998 | 77.34 | 67.23 | 10.11 | 33480.17 | 1660.74 | 6.56 | 59.83 | 11.75 | 80.35 | 5.27 | 1.29 | 78.53 | 24.56 | 1.71 | 99.20 | 100.00 | 705167.71 | 91978.39 |
|                | 1999 | 77.53 | 67.40 | 10.14 | 34442.11 | 1769.18 | 6.83 | 58.90 | 11.41 | 80.63 | 5.50 | 1.32 | 78.59 | 24.49 | 1.68 | 99.20 | 100.00 | 680102.48 | 92028.34 |
|                | 2000 | 77.84 | 67.64 | 10.20 | 35576.77 | 1763.46 | 6.94 | 53.81 | 10.99 | 79.58 | 5.52 | 1.42 | 78.65 | 24.42 | 1.64 | 99.20 | 100.00 | 673897.41 | 92096.09 |
|                | 2001 | 78.10 | 67.84 | 10.25 | 36341.71 | 1840.44 | 7.31 | 51.17 | 10.81 | 78.87 | 5.77 | 1.54 | 78.75 | 24.42 | 1.63 | 99.20 | 100.00 | 683080.09 | 92036.88 |
|                | 2002 | 78.31 | 68.01 | 10.30 | 37077.65 | 2070.69 | 7.57 | 53.56 | 10.81 | 79.81 | 6.04 | 1.53 | 79.05 | 24.40 | 1.63 | 99.20 | 100.00 | 661572.36 | 91979.28 |
|                | 2003 | 78.45 | 68.15 | 10.30 | 38132.84 | 2462.06 | 7.81 | 53.59 | 10.99 | 79.49 | 6.21 | 1.60 | 79.34 | 24.37 | 1.70 | 99.20 | 100.00 | 670993.35 | 91910.75 |
|                | 2004 | 78.82 | 68.39 | 10.43 | 38813.02 | 2963.51 | 7.98 | 53.09 | 9.96  | 81.24 | 6.48 | 1.50 | 79.63 | 24.34 | 1.75 | 99.20 | 100.00 | 662917.60 | 91835.22 |
|                | 2005 | 79.10 | 68.59 | 10.51 | 39740.90 | 3176.57 | 8.24 | 49.55 | 9.49  | 80.85 | 6.66 | 1.58 | 79.92 | 24.32 | 1.76 | 99.20 | 100.00 | 659108.09 | 91764.83 |
|                | 2006 | 79.38 | 68.82 | 10.56 | 40418.75 | 3425.61 | 8.36 | 53.63 | 9.85  | 81.63 | 6.83 | 1.54 | 80.20 | 24.41 | 1.82 | 99.20 | 100.00 | 658331.24 | 91704.29 |
|                | 2007 | 79.64 | 69.03 | 10.61 | 41050.41 | 3937.19 | 8.42 | 51.96 | 80.73 | 80.73 | 6.79 | 1.62 | 80.48 | 24.50 | 1.86 | 99.20 | 100.00 | 646412.15 | 91635.04 |
|                | 2008 | 79.88 | 69.23 | 10.65 | 40536.13 | 3863.74 | 8.85 | 48.73 | 8.98  | 81.58 | 7.22 | 1.63 | 80.76 | 24.63 | 1.91 | 99.20 | 100.00 | 635417.17 | 91572.83 |
|                | 2009 | 80.17 | 69.45 | 10.72 | 38545.92 | 3491.25 | 9.81 | 52.74 | 8.85  | 83.21 | 8.16 | 1.65 | 81.03 | 24.85 | 1.89 | 99.20 | 100.00 | 584940.88 | 91518.45 |

|               |       |       |       |          |          |         |       |       |       |       |      |       |       |       |       |        |           |            |          |
|---------------|-------|-------|-------|----------|----------|---------|-------|-------|-------|-------|------|-------|-------|-------|-------|--------|-----------|------------|----------|
| 2010          | 80.39 | 69.62 | 10.76 | 38893.02 | 3491.22  | 9.51    | 58.39 | 9.61  | 83.53 | 7.94  | 1.57 | 81.30 | 25.19 | 1.92  | 99.20 | 100.00 | 609586.56 | 91472.82   |          |
| 2011          | 80.58 | 69.78 | 10.81 | 39150.76 | 3648.95  | 9.34    | 55.21 | 9.30  | 83.15 | 7.77  | 1.57 | 81.57 | 25.71 | 1.91  | 99.20 | 100.00 | 568061.83 | 91457.18   |          |
| 2012          | 80.68 | 69.87 | 10.82 | 39455.41 | 3648.68  | 9.41    | 55.38 | 9.46  | 82.91 | 7.80  | 1.61 | 81.83 | 26.33 | 1.92  | 99.20 | 100.00 | 585779.78 | 91461.84   |          |
| 2013          | 80.77 | 69.94 | 10.83 | 39996.50 | 3684.75  | 9.34    | 57.19 | 9.55  | 83.31 | 7.78  | 1.56 | 82.09 | 27.00 | 1.83  | 99.20 | 100.00 | -         | 91489.39   |          |
| 2014          | 80.82 | 69.98 | 10.84 | 40908.75 | 3934.82  | 9.12    | 57.74 | 9.73  | 83.14 | 7.58  | 1.54 | 82.35 | 27.64 | 1.81  | 99.20 | 100.00 | -         | 91553.40   |          |
| 2015          | 80.86 | 70.01 | 10.84 | 41536.92 | -        | -       | -     | -     | -     | -     | -    | 82.59 | 28.19 | 1.81  | 99.20 | 100.00 | -         | 91614.94   |          |
| 2016          | 80.90 | 70.05 | 10.85 | 41954.74 | -        | -       | -     | -     | -     | -     | -    | 82.84 | 28.66 | -     | -     | -      | -         | 91672.80   |          |
| 2017          | 80.97 | 69.30 | 11.67 | -        | -        | -       | -     | -     | -     | -     | -    | -     | -     | -     | -     | -      | -         | -          |          |
| United States | 1995  | 75.96 | 65.63 | 10.33    | 38677.72 | 3788.31 | 13.09 | 26.33 | 14.44 | 45.16 | 5.91 | 7.18  | 77.26 | 19.37 | 1.98  | 99.60  | 98.60     | 6365296.60 | 88342.26 |
|               | 1996  | 76.29 | 65.90 | 10.39    | 39681.52 | 3944.28 | 13.04 | 25.95 | 14.23 | 45.16 | 5.89 | 7.15  | 77.64 | 19.28 | 1.98  | 99.70  | 98.70     | 6577713.10 | 88357.64 |
|               | 1997  | 76.67 | 66.20 | 10.47    | 40965.85 | 4116.25 | 12.96 | 26.29 | 14.47 | 44.98 | 5.83 | 7.13  | 78.01 | 19.15 | 1.97  | 99.70  | 98.70     | 6724414.40 | 88391.37 |
|               | 1998  | 76.80 | 66.30 | 10.50    | 42292.89 | 4302.44 | 12.99 | 26.62 | 14.99 | 43.71 | 5.68 | 7.31  | 78.38 | 18.99 | 2.00  | 99.70  | 98.70     | 6749016.10 | 88432.26 |
|               | 1999  | 76.84 | 66.33 | 10.52    | 43768.88 | 4521.69 | 12.99 | 26.34 | 14.96 | 43.22 | 5.61 | 7.38  | 78.74 | 18.82 | 2.01  | 99.70  | 98.80     | 6808137.80 | 88481.83 |
|               | 2000  | 76.96 | 66.39 | 10.57    | 45055.82 | 4788.31 | 13.07 | 26.08 | 14.80 | 43.26 | 5.65 | 7.42  | 79.06 | 18.67 | 2.06  | 99.70  | 98.80     | 6969123.80 | 88553.19 |
|               | 2001  | 77.04 | 66.45 | 10.59    | 45047.49 | 5140.23 | 13.73 | 25.37 | 14.15 | 44.24 | 6.07 | 7.65  | 79.23 | 18.59 | 2.03  | 99.80  | 98.80     | 6821235.60 | 88553.77 |
|               | 2002  | 77.17 | 66.54 | 10.63    | 45428.65 | 5575.83 | 14.55 | 24.59 | 13.73 | 44.15 | 6.42 | 8.13  | 79.41 | 18.51 | 2.02  | 99.80  | 98.90     | 6981786.80 | 88574.09 |
|               | 2003  | 77.32 | 66.65 | 10.68    | 46304.04 | 5995.08 | 15.06 | 24.26 | 13.60 | 43.95 | 6.62 | 8.44  | 79.58 | 18.44 | 2.05  | 99.80  | 98.90     | 6991255.20 | 88593.66 |
|               | 2004  | 77.54 | 66.80 | 10.74    | 47614.28 | 6369.43 | 15.14 | 24.01 | 13.38 | 44.25 | 6.70 | 8.44  | 79.76 | 18.41 | 2.05  | 99.80  | 98.90     | 7244271.50 | 88625.36 |
|               | 2005  | 77.70 | 66.89 | 10.80    | 48755.62 | 6741.03 | 15.15 | 23.92 | 13.31 | 44.36 | 6.72 | 8.43  | 79.93 | 18.40 | 2.06  | 99.80  | 99.00     | 7182808.40 | 88661.42 |
|               | 2006  | 77.95 | 67.08 | 10.87    | 49575.40 | 7122.37 | 15.27 | 23.55 | 12.93 | 45.07 | 6.88 | 8.39  | 80.10 | 18.50 | 2.11  | 99.90  | 99.00     | 6994086.90 | 88657.74 |
|               | 2007  | 78.17 | 67.23 | 10.94    | 49979.53 | 7511.96 | 15.57 | 23.47 | 45.07 | 45.07 | 7.02 | 8.55  | 80.27 | 18.63 | 2.12  | 99.90  | 99.00     | 7128951.70 | 88659.09 |
|               | 2008  | 78.37 | 67.37 | 11.00    | 49364.64 | 7786.21 | 16.02 | 23.22 | 12.54 | 45.98 | 7.37 | 8.65  | 80.44 | 18.80 | 2.07  | 99.90  | 99.00     | 6648991.20 | 88684.16 |
|               | 2009  | 78.60 | 67.53 | 11.07    | 47575.61 | 8023.00 | 17.00 | 22.74 | 12.02 | 47.15 | 8.01 | 8.98  | 80.61 | 19.06 | 2.00  | 99.90  | 99.10     | 6604068.95 | 88733.39 |
|               | 2010  | 78.78 | 67.65 | 11.13    | 48373.88 | 8269.37 | 17.02 | 22.39 | 11.76 | 47.48 | 8.08 | 8.94  | 80.77 | 19.40 | 1.93  | 99.90  | 99.10     | 6713348.97 | 88809.49 |
|               | 2011  | 78.87 | 67.72 | 11.15    | 48783.47 | 8523.83 | 17.06 | 22.22 | 11.70 | 47.34 | 8.07 | 8.98  | 80.94 | 19.83 | 1.89  | 100.00 | 99.10     | 6571653.98 | 88890.65 |
|               | 2012  | 78.94 | 67.77 | 11.17    | 49497.59 | 8789.77 | 17.02 | 21.97 | 11.59 | 47.26 | 8.04 | 8.97  | 81.11 | 20.34 | 1.88  | 100.00 | 99.10     | 6343840.51 | 88984.00 |
|               | 2013  | 78.96 | 67.78 | 11.18    | 49976.63 | 8987.90 | 16.90 | 21.93 | 11.49 | 47.61 | 8.05 | 8.85  | 81.28 | 20.90 | 1.86  | 100.00 | 99.20     | -          | 89077.33 |
|               | 2014  | 78.94 | 67.76 | 11.18    | 50782.52 | 9402.54 | 17.14 | 21.37 | 11.05 | 48.30 | 8.28 | 8.86  | 81.45 | 21.50 | 1.86  | 100.00 | 99.20     | -          | 89164.28 |
|               | 2015  | 78.87 | 67.71 | 11.17    | 51855.91 | -       | -     | -     | -     | -     | -    | -     | 81.62 | 22.13 | 1.84  | 100.00 | 99.20     | -          | 89250.07 |

|           |      |       |       |       |          |         |       |       |       |       |      |      |       |       |       |       |        |          |          |          |
|-----------|------|-------|-------|-------|----------|---------|-------|-------|-------|-------|------|------|-------|-------|-------|-------|--------|----------|----------|----------|
|           | 2016 | 78.86 | 67.69 | 11.16 | 52262.78 | -       | -     | -     | -     | -     | -    | -    | -     | 81.79 | 22.80 | -     | -      | -        | -        | 89337.35 |
|           | 2017 | 78.59 | 66.57 | 12.03 | -        | -       | -     | -     | -     | -     | -    | -    | -     | -     | -     | -     | -      | -        | -        | -        |
| Uruguay   | 1995 | 73.46 | 64.82 | 8.64  | 8044.64  | 755.83  | 12.63 | 23.32 | 16.16 | 30.72 | 3.88 | 8.75 | 90.54 | 19.90 | 2.40  | 92.30 | 95.40  | 30383.55 | 89306.26 |          |
|           | 1996 | 73.65 | 64.99 | 8.67  | 8432.62  | 676.29  | 10.71 | 27.71 | 18.85 | 31.99 | 3.42 | 7.28 | 90.84 | 20.20 | 2.36  | 92.60 | 95.70  | 31694.52 | 89248.04 |          |
|           | 1997 | 73.90 | 65.20 | 8.71  | 9089.12  | 615.46  | 8.40  | 30.95 | 21.33 | 31.10 | 2.61 | 5.79 | 91.15 | 20.46 | 2.33  | 92.80 | 96.00  | 31457.97 | 89224.76 |          |
|           | 1998 | 74.16 | 65.42 | 8.73  | 9438.88  | 686.76  | 8.91  | 27.75 | 19.69 | 29.04 | 2.59 | 6.32 | 91.45 | 20.69 | 2.29  | 93.00 | 96.30  | 30975.10 | 89211.66 |          |
|           | 1999 | 74.41 | 65.64 | 8.77  | 9207.79  | 561.73  | 7.75  | 33.18 | 20.69 | 37.65 | 2.92 | 4.83 | 91.74 | 20.87 | 2.27  | 93.20 | 96.50  | 32266.31 | 89236.22 |          |
|           | 2000 | 74.82 | 65.99 | 8.84  | 8997.66  | 537.33  | 7.82  | 31.17 | 20.36 | 34.68 | 2.71 | 5.11 | 92.03 | 20.99 | 2.24  | 93.50 | 96.80  | 30375.78 | 89281.53 |          |
|           | 2001 | 74.93 | 66.07 | 8.86  | 8636.55  | 468.52  | 7.46  | 30.87 | 21.29 | 31.03 | 2.31 | 5.14 | 92.30 | 21.20 | 2.22  | 93.70 | 97.00  | 29627.40 | 89354.60 |          |
|           | 2002 | 75.06 | 66.17 | 8.89  | 7967.16  | 293.53  | 7.18  | 30.64 | 21.91 | 28.48 | 2.04 | 5.13 | 92.57 | 21.35 | 2.21  | 93.90 | 97.30  | 30061.09 | 89444.04 |          |
|           | 2003 | 75.03 | 66.15 | 8.88  | 8036.48  | 235.98  | 6.52  | 32.63 | 23.85 | 26.91 | 1.75 | 4.76 | 92.83 | 21.45 | 2.19  | 94.10 | 97.50  | 30911.30 | 89544.09 |          |
|           | 2004 | 75.30 | 66.38 | 8.93  | 8442.55  | 477.10  | 11.59 | 32.42 | 12.01 | 62.95 | 7.29 | 4.29 | 93.08 | 21.53 | 2.17  | 94.30 | 97.70  | 32686.69 | 89655.91 |          |
|           | 2005 | 75.63 | 66.66 | 8.96  | 9068.24  | 582.12  | 11.15 | 32.08 | 11.74 | 63.41 | 7.07 | 4.08 | 93.32 | 21.59 | 2.16  | 94.50 | 97.90  | 32688.88 | 89776.85 |          |
|           | 2006 | 75.84 | 66.83 | 9.01  | 9424.52  | 656.67  | 11.17 | 31.11 | 10.94 | 64.85 | 7.25 | 3.93 | 93.55 | 21.69 | 2.14  | 94.70 | 98.10  | 34035.50 | 89846.74 |          |
|           | 2007 | 75.85 | 66.80 | 9.05  | 10014.87 | 576.77  | 8.23  | 29.88 | 55.82 | 55.82 | 4.59 | 3.63 | 93.78 | 21.77 | 2.13  | 94.90 | 98.40  | 33889.42 | 89909.10 |          |
|           | 2008 | 76.15 | 67.01 | 9.14  | 10698.05 | 740.64  | 8.17  | 33.77 | 11.88 | 64.82 | 5.30 | 2.87 | 94.00 | 21.83 | 2.11  | 95.10 | 98.60  | 34052.25 | 89977.18 |          |
|           | 2009 | 76.39 | 67.19 | 9.20  | 11112.46 | 827.09  | 8.78  | 46.73 | 18.25 | 60.93 | 5.35 | 3.43 | 94.21 | 21.88 | 2.09  | 95.30 | 98.70  | 33509.68 | 90026.76 |          |
|           | 2010 | 76.42 | 67.22 | 9.20  | 11938.21 | 1030.06 | 8.63  | 46.92 | 17.71 | 62.27 | 5.37 | 3.26 | 94.41 | 21.94 | 2.08  | 95.50 | 98.90  | 33285.20 | 90079.23 |          |
|           | 2011 | 76.49 | 67.24 | 9.25  | 12512.91 | 1211.82 | 8.55  | 48.70 | 17.27 | 64.54 | 5.52 | 3.03 | 94.61 | 22.05 | 2.06  | 95.70 | 99.10  | 33773.77 | 90095.49 |          |
|           | 2012 | 76.58 | 67.31 | 9.27  | 12913.10 | 1322.25 | 8.74  | 52.74 | 16.86 | 68.04 | 5.95 | 2.79 | 94.80 | 22.15 | 2.05  | 95.90 | 99.30  | 34237.83 | 90108.16 |          |
|           | 2013 | 76.81 | 67.48 | 9.32  | 13467.44 | 1464.75 | 8.68  | 54.90 | 16.47 | 70.00 | 6.07 | 2.60 | 94.98 | 22.26 | 2.03  | 96.10 | 99.50  | -        | 90112.35 |          |
|           | 2014 | 77.08 | 67.70 | 9.38  | 13856.70 | 1442.28 | 8.58  | 54.12 | 15.58 | 71.22 | 6.11 | 2.47 | 95.15 | 22.38 | 2.02  | 96.30 | 99.60  | -        | 90111.58 |          |
|           | 2015 | 77.21 | 67.80 | 9.41  | 13859.41 | -       | -     | -     | -     | -     | -    | -    | 95.31 | 22.50 | 2.01  | 96.40 | 99.70  | -        | 90122.75 |          |
|           | 2016 | 77.33 | 67.93 | 9.39  | 14010.00 | -       | -     | -     | -     | -     | -    | -    | 95.46 | 22.65 | -     | -     | -      | -        | 90128.16 |          |
|           | 2017 | 77.05 | 67.20 | 9.84  | -        | -       | -     | -     | -     | -     | -    | -    | -     | -     | -     | -     | -      | -        | -        |          |
| US Virgin | 1995 | 72.63 | 64.03 | 8.60  | -        | -       | -     | -     | -     | -     | -    | -    | 90.44 | 11.38 | 2.48  | 96.40 | 100.00 | 47.59    | 91166.12 |          |
|           | 1996 | 72.88 | 64.25 | 8.64  | -        | -       | -     | -     | -     | -     | -    | -    | 90.92 | 11.66 | 2.37  | 96.40 | 100.00 | 48.03    | 91241.98 |          |
|           | 1997 | 72.96 | 64.30 | 8.65  | -        | -       | -     | -     | -     | -     | -    | -    | 91.37 | 11.93 | 2.27  | 96.40 | 100.00 | 48.59    | 91333.97 |          |
|           | 1998 | 73.08 | 64.40 | 8.68  | -        | -       | -     | -     | -     | -     | -    | -    | 91.81 | 12.28 | 2.18  | 96.40 | 100.00 | 42.02    | 91442.56 |          |



Table S2 Projected global and regional Life Expectancy, 2017-2025 (95% confidence interval)

|                           | 2017  | 2018  | 2019  | 2020  | 2021  | 2022  | 2023  | 2024  | 2025  |
|---------------------------|-------|-------|-------|-------|-------|-------|-------|-------|-------|
| Afghanistan               | 58.30 | 58.66 | 59.01 | 59.37 | 59.74 | 60.10 | 60.47 | 60.84 | 61.21 |
| Albania                   | 77.59 | 77.80 | 78.00 | 78.20 | 78.40 | 78.60 | 78.80 | 79.00 | 79.20 |
| Algeria                   | 77.53 | 77.67 | 77.81 | 77.95 | 78.10 | 78.24 | 78.38 | 78.53 | 78.67 |
| Andorra                   | 82.52 | 82.52 | 82.52 | 82.52 | 82.51 | 82.51 | 82.51 | 82.51 | 82.51 |
| Angola                    | 65.30 | 65.94 | 66.57 | 67.17 | 67.75 | 68.31 | 68.83 | 69.33 | 69.79 |
| Antigua and<br>Barbuda    | 77.45 | 77.54 | 77.63 | 77.71 | 77.79 | 77.87 | 77.94 | 78.00 | 78.07 |
| Argentina                 | 76.88 | 77.05 | 77.22 | 77.40 | 77.57 | 77.74 | 77.92 | 78.09 | 78.26 |
| Armenia                   | 76.11 | 76.37 | 76.63 | 76.88 | 77.14 | 77.40 | 77.66 | 77.92 | 78.18 |
| Australia                 | 82.37 | 82.19 | 81.97 | 81.74 | 81.47 | 82.31 | 82.27 | 82.24 | 82.20 |
| Austria                   | 81.66 | 81.79 | 81.91 | 82.04 | 82.16 | 82.28 | 82.41 | 82.53 | 82.66 |
| Azerbaijan                | 72.45 | 72.87 | 73.31 | 73.74 | 74.19 | 74.64 | 75.10 | 75.56 | 76.03 |
| Bahamas                   | 73.94 | 74.03 | 74.13 | 74.22 | 74.31 | 74.40 | 74.50 | 74.59 | 74.68 |
| Bahrain                   | 77.00 | 77.23 | 77.46 | 77.67 | 77.88 | 78.09 | 78.28 | 78.47 | 78.66 |
| Bangladesh                | 73.02 | 73.44 | 73.90 | 74.38 | 74.91 | 75.49 | 76.11 | 76.79 | 77.52 |
| Barbados                  | 76.55 | 76.49 | 76.42 | 76.35 | 76.28 | 76.21 | 76.14 | 76.08 | 76.01 |
| Belarus                   | 73.93 | 74.24 | 74.54 | 74.85 | 75.16 | 75.46 | 75.77 | 76.07 | 76.38 |
| Belgium                   | 81.05 | 81.19 | 81.32 | 81.45 | 81.57 | 81.69 | 81.80 | 81.91 | 82.02 |
| Benin                     | 64.91 | 65.40 | 65.90 | 66.39 | 66.88 | 67.37 | 67.87 | 68.36 | 68.85 |
| Bhutan                    | 74.06 | 74.31 | 74.57 | 74.82 | 75.08 | 75.33 | 75.59 | 75.85 | 76.10 |
| Bolivia                   | 73.47 | 73.70 | 73.93 | 74.15 | 74.38 | 74.60 | 74.83 | 75.07 | 75.32 |
| Bosnia and<br>Herzegovina | 77.75 | 77.95 | 78.15 | 78.35 | 78.55 | 78.75 | 78.95 | 79.15 | 79.35 |
| Botswana                  | 65.97 | 66.55 | 66.96 | 67.18 | 67.17 | 66.93 | 66.42 | 65.62 | 64.51 |
| Brazil                    | 75.35 | 75.45 | 75.55 | 75.65 | 75.76 | 75.86 | 75.96 | 76.07 | 76.17 |
| Bulgaria                  | 75.16 | 75.35 | 75.55 | 75.77 | 75.99 | 76.22 | 76.46 | 76.70 | 76.94 |
| Burundi                   | 60.71 | 61.08 | 61.45 | 61.81 | 62.18 | 62.54 | 62.91 | 63.27 | 63.64 |

(Continue to next page)

|                                | 2017  | 2018  | 2019  | 2020  | 2021  | 2022  | 2023  | 2024  | 2025  |
|--------------------------------|-------|-------|-------|-------|-------|-------|-------|-------|-------|
| (Continued from previous page) |       |       |       |       |       |       |       |       |       |
| Cameroon                       | 60.65 | 61.16 | 61.67 | 62.19 | 62.70 | 63.21 | 63.72 | 64.23 | 64.74 |
| Canada                         | 81.93 | 82.01 | 82.08 | 82.16 | 82.24 | 82.31 | 82.39 | 82.47 | 82.54 |
| Chad                           | 60.37 | 60.95 | 61.54 | 62.12 | 62.70 | 63.28 | 63.86 | 64.44 | 65.02 |
| Chile                          | 80.47 | 80.62 | 80.77 | 80.92 | 81.07 | 81.22 | 81.37 | 81.52 | 81.67 |
| Colombia                       | 78.55 | 78.84 | 79.12 | 79.41 | 79.69 | 79.97 | 80.25 | 80.53 | 80.81 |
| China                          | 76.71 | 77.04 | 77.38 | 77.71 | 78.04 | 78.36 | 78.67 | 78.99 | 79.29 |
| Comoros                        | 68.00 | 68.33 | 68.76 | 69.11 | 69.52 | 69.89 | 70.29 | 70.67 | 71.06 |
| Congogold                      | 64.34 | 65.01 | 65.68 | 66.35 | 67.02 | 67.69 | 68.36 | 69.03 | 69.70 |
| Costa Rica                     | 81.08 | 81.17 | 81.27 | 81.36 | 81.46 | 81.55 | 81.65 | 81.74 | 81.84 |
| Coted Ivoire                   | 60.59 | 61.32 | 62.04 | 62.77 | 63.50 | 64.22 | 64.95 | 65.68 | 66.40 |
| Croatia                        | 77.37 | 77.38 | 77.39 | 77.40 | 77.41 | 77.42 | 77.43 | 77.44 | 77.45 |
| Cuba                           | 79.00 | 79.08 | 79.16 | 79.25 | 79.33 | 79.41 | 79.50 | 79.58 | 79.66 |
| Cyprus                         | 80.46 | 80.44 | 80.42 | 80.40 | 80.38 | 80.37 | 80.35 | 80.33 | 80.31 |
| Czech Republic                 | 79.25 | 79.40 | 79.54 | 79.69 | 79.84 | 79.98 | 80.13 | 80.27 | 80.42 |
| Denmark                        | 81.08 | 81.34 | 81.60 | 81.86 | 82.13 | 82.39 | 82.65 | 82.92 | 83.18 |
| Djibouti                       | 67.25 | 67.98 | 68.66 | 69.47 | 70.26 | 71.16 | 72.07 | 73.07 | 74.10 |
| Timor-Leste                    | 74.95 | 75.64 | 76.34 | 77.03 | 77.72 | 78.41 | 79.10 | 79.79 | 80.49 |
| El Salvador                    | 75.61 | 75.81 | 76.00 | 76.19 | 76.39 | 76.58 | 76.77 | 76.97 | 77.16 |
| Equatorial Guinea              | 65.89 | 66.30 | 66.70 | 67.11 | 67.52 | 67.92 | 68.33 | 68.74 | 69.14 |
| Eritrea                        | 64.29 | 64.67 | 65.05 | 65.43 | 65.81 | 66.19 | 66.57 | 66.94 | 67.32 |
| Estonia                        | 77.79 | 77.98 | 78.15 | 78.29 | 78.40 | 78.50 | 78.56 | 78.61 | 78.62 |
| Ethiopia                       | 65.38 | 65.39 | 65.40 | 65.40 | 65.41 | 65.42 | 65.42 | 65.43 | 65.44 |
| Fiji                           | 65.38 | 65.39 | 65.40 | 65.40 | 65.41 | 65.42 | 65.42 | 65.43 | 65.44 |
| Finland                        | 82.02 | 82.31 | 82.60 | 82.89 | 83.19 | 83.49 | 83.80 | 84.11 | 84.42 |

|        |       |       |       |       |       |       |       |       |       |
|--------|-------|-------|-------|-------|-------|-------|-------|-------|-------|
| France | 82.49 | 82.64 | 82.78 | 82.92 | 83.05 | 83.18 | 83.30 | 83.42 | 83.53 |
|--------|-------|-------|-------|-------|-------|-------|-------|-------|-------|

(Continue to next page)

---

|  | 2017 | 2018 | 2019 | 2020 | 2021 | 2022 | 2023 | 2024 | 2025 |
|--|------|------|------|------|------|------|------|------|------|
|--|------|------|------|------|------|------|------|------|------|

---

(Continued from previous page)

|            |       |       |       |       |       |       |       |       |       |
|------------|-------|-------|-------|-------|-------|-------|-------|-------|-------|
| Gabon      | 67.19 | 67.84 | 68.49 | 69.15 | 69.80 | 70.45 | 71.10 | 71.76 | 72.41 |
| Gambia     | 67.68 | 68.04 | 68.41 | 68.79 | 69.18 | 69.58 | 69.99 | 70.41 | 70.85 |
| Ghana      | 66.58 | 67.16 | 67.73 | 68.31 | 68.88 | 69.46 | 70.03 | 70.61 | 71.18 |
| Greece     | 81.07 | 81.17 | 81.26 | 81.34 | 81.42 | 81.50 | 81.57 | 81.63 | 81.70 |
| Guatemala  | 72.92 | 73.08 | 73.25 | 73.41 | 73.58 | 73.74 | 73.91 | 74.07 | 74.24 |
| Guinea     | 61.15 | 61.63 | 62.12 | 62.62 | 63.14 | 63.66 | 64.19 | 64.74 | 65.29 |
| Guyana     | 68.54 | 69.34 | 70.14 | 70.94 | 71.74 | 72.53 | 73.33 | 74.13 | 74.93 |
| Honduras   | 73.23 | 73.48 | 73.73 | 73.98 | 74.23 | 74.48 | 74.73 | 74.99 | 75.24 |
| Hungary    | 75.74 | 75.74 | 75.74 | 75.74 | 75.74 | 75.74 | 75.73 | 75.73 | 75.73 |
| Iceland    | 82.30 | 82.32 | 82.35 | 82.38 | 82.40 | 82.43 | 82.46 | 82.48 | 82.51 |
| India      | 68.93 | 69.36 | 69.75 | 70.16 | 70.52 | 70.91 | 71.26 | 71.62 | 71.95 |
| Indonesia  | 71.94 | 72.22 | 72.51 | 72.79 | 73.07 | 73.35 | 73.63 | 73.92 | 74.20 |
| Iraq       | 67.60 | 67.60 | 67.60 | 67.60 | 67.60 | 67.60 | 67.60 | 67.60 | 67.60 |
| Ireland    | 81.17 | 81.19 | 81.21 | 81.23 | 81.26 | 81.28 | 81.30 | 81.32 | 81.35 |
| Iran       | 76.34 | 76.76 | 77.19 | 77.63 | 78.09 | 78.56 | 79.04 | 79.54 | 80.05 |
| Israel     | 82.29 | 82.44 | 82.58 | 82.72 | 82.84 | 82.96 | 83.07 | 83.17 | 83.27 |
| Italy      | 82.45 | 82.47 | 82.49 | 82.51 | 82.53 | 82.55 | 82.57 | 82.59 | 82.61 |
| Jamaica    | 74.96 | 75.04 | 75.12 | 75.22 | 75.32 | 75.43 | 75.54 | 75.66 | 75.78 |
| Japan      | 84.08 | 84.21 | 84.33 | 84.44 | 84.55 | 84.66 | 84.76 | 84.85 | 84.93 |
| Jordan     | 75.88 | 75.46 | 75.05 | 74.63 | 74.21 | 73.80 | 73.38 | 72.97 | 72.55 |
| Kazakhstan | 71.37 | 70.47 | 68.96 | 66.72 | 63.68 | 59.72 | 54.73 | 48.59 | 41.19 |
| Kenya      | 67.38 | 67.92 | 68.46 | 69.00 | 69.54 | 70.08 | 70.62 | 71.16 | 71.70 |
| Kiribati   | 62.02 | 62.25 | 62.49 | 62.72 | 62.96 | 63.19 | 63.43 | 63.66 | 63.89 |

|                                |       |       |       |       |       |       |       |       |       |
|--------------------------------|-------|-------|-------|-------|-------|-------|-------|-------|-------|
| Kuwait                         | 79.61 | 79.53 | 79.45 | 79.37 | 79.29 | 79.21 | 79.12 | 79.04 | 78.96 |
| Kyrgyzstan                     | 71.42 | 71.61 | 71.79 | 71.98 | 72.16 | 72.35 | 72.53 | 72.72 | 72.90 |
| (Continue to next page)        |       |       |       |       |       |       |       |       |       |
|                                | 2017  | 2018  | 2019  | 2020  | 2021  | 2022  | 2023  | 2024  | 2025  |
| (Continued from previous page) |       |       |       |       |       |       |       |       |       |
| Laos                           | 67.73 | 68.21 | 68.69 | 69.18 | 69.66 | 70.14 | 70.62 | 71.10 | 71.59 |
| Lebanon                        | 80.19 | 80.23 | 80.26 | 80.30 | 80.33 | 80.37 | 80.40 | 80.44 | 80.47 |
| Lesotho                        | 51.11 | 51.92 | 52.72 | 53.53 | 54.33 | 55.14 | 55.94 | 56.75 | 57.55 |
| Liberia                        | 64.88 | 65.53 | 66.18 | 66.83 | 67.48 | 68.12 | 68.77 | 69.42 | 70.07 |
| Lithuania                      | 75.46 | 75.75 | 76.05 | 76.35 | 76.65 | 76.94 | 77.24 | 77.54 | 77.83 |
| Luxembourg                     | 82.20 | 82.29 | 82.38 | 82.46 | 82.55 | 82.63 | 82.72 | 82.80 | 82.89 |
| Macedonia                      | 74.97 | 75.12 | 75.27 | 75.41 | 75.55 | 75.69 | 75.83 | 75.97 | 76.10 |
| Malawi                         | 60.98 | 61.79 | 62.60 | 63.40 | 64.21 | 65.02 | 65.82 | 66.63 | 67.44 |
| Malaysia                       | 75.80 | 76.04 | 76.29 | 76.53 | 76.77 | 77.01 | 77.26 | 77.50 | 77.74 |
| Malta                          | 81.51 | 81.59 | 81.68 | 81.76 | 81.84 | 81.93 | 82.01 | 82.09 | 82.18 |
| Mauritania                     | 70.55 | 70.94 | 71.33 | 71.72 | 72.10 | 72.48 | 72.87 | 73.25 | 73.62 |
| Mexico                         | 76.41 | 76.42 | 76.42 | 76.41 | 76.39 | 76.35 | 76.30 | 76.23 | 76.16 |
| Mongolia                       | 68.24 | 68.36 | 68.48 | 68.60 | 68.73 | 68.85 | 68.97 | 69.09 | 69.21 |
| Montenegro                     | 77.14 | 77.25 | 77.35 | 77.45 | 77.56 | 77.66 | 77.77 | 77.87 | 77.98 |
| Morocco                        | 75.21 | 75.40 | 75.59 | 75.78 | 75.96 | 76.13 | 76.30 | 76.47 | 76.63 |
| Mozambique                     | 61.06 | 62.11 | 63.15 | 64.20 | 65.24 | 66.28 | 67.33 | 68.37 | 69.41 |
| Namibia                        | 65.41 | 66.13 | 66.94 | 67.82 | 68.79 | 69.83 | 70.96 | 72.17 | 73.46 |
| new Zealand                    | 81.98 | 82.13 | 82.28 | 82.44 | 82.59 | 82.74 | 82.90 | 83.05 | 83.20 |
| Nicaragua                      | 78.53 | 78.75 | 78.96 | 79.18 | 79.40 | 79.61 | 79.83 | 80.05 | 80.26 |
| Niger                          | 62.13 | 62.59 | 63.05 | 63.50 | 63.96 | 64.42 | 64.88 | 65.33 | 65.79 |
| Nigeria                        | 65.99 | 66.97 | 67.94 | 68.92 | 69.89 | 70.86 | 71.84 | 72.81 | 73.79 |
| Norway                         | 82.11 | 82.11 | 82.12 | 82.13 | 82.14 | 82.15 | 82.15 | 82.16 | 82.17 |

|                                |       |       |       |       |       |       |       |       |       |
|--------------------------------|-------|-------|-------|-------|-------|-------|-------|-------|-------|
| Pakistan                       | 67.97 | 68.35 | 68.72 | 69.10 | 69.48 | 69.85 | 70.23 | 70.60 | 70.98 |
| Panama                         | 79.19 | 79.47 | 79.74 | 80.02 | 80.29 | 80.57 | 80.84 | 81.12 | 81.39 |
| Papua New Guinea               | 61.13 | 61.48 | 61.83 | 62.17 | 62.52 | 62.87 | 63.22 | 63.57 | 63.91 |
| (Continue to next page)        |       |       |       |       |       |       |       |       |       |
|                                | 2017  | 2018  | 2019  | 2020  | 2021  | 2022  | 2023  | 2024  | 2025  |
| (Continued from previous page) |       |       |       |       |       |       |       |       |       |
| Paraguay                       | 74.59 | 74.72 | 74.85 | 74.98 | 75.11 | 75.23 | 75.36 | 75.49 | 75.62 |
| Peru                           | 79.92 | 80.10 | 80.27 | 80.45 | 80.63 | 80.81 | 80.98 | 81.16 | 81.34 |
| Philippines                    | 70.34 | 70.57 | 70.80 | 71.03 | 71.26 | 71.49 | 71.72 | 71.95 | 72.18 |
| Poland                         | 78.14 | 78.34 | 78.53 | 78.72 | 78.89 | 79.06 | 79.23 | 79.38 | 79.53 |
| Portugal                       | 81.12 | 81.20 | 81.27 | 81.35 | 81.43 | 81.50 | 81.58 | 81.66 | 81.74 |
| Qatar                          | 79.78 | 79.69 | 79.60 | 79.51 | 79.42 | 79.34 | 79.25 | 79.16 | 79.07 |
| Republic of Congo              | 61.88 | 62.63 | 63.38 | 64.13 | 64.88 | 65.63 | 66.38 | 67.13 | 67.88 |
| Republic of Guinea-Bissau      | 59.39 | 60.05 | 60.74 | 61.45 | 62.18 | 62.94 | 63.73 | 64.54 | 65.37 |
| Republic of Korea              | 80.93 | 80.81 | 80.63 | 80.40 | 80.10 | 79.75 | 79.33 | 78.84 | 78.29 |
| Romania                        | 75.49 | 75.75 | 76.00 | 76.26 | 76.51 | 76.76 | 77.01 | 77.26 | 77.50 |
| Rwanda                         | 68.11 | 68.43 | 68.74 | 69.06 | 69.38 | 69.70 | 70.02 | 70.34 | 70.66 |
| Saint Lucia                    | 75.28 | 75.28 | 75.28 | 75.28 | 75.29 | 75.29 | 75.29 | 75.29 | 75.29 |
| Saint Vincent                  | 71.73 | 71.82 | 71.91 | 72.00 | 72.10 | 72.21 | 72.31 | 72.42 | 72.53 |
| Sao Tome and Principe          | 70.89 | 71.17 | 71.46 | 71.75 | 72.04 | 72.33 | 72.62 | 72.91 | 73.20 |
| Saudi Arabia                   | 77.47 | 77.88 | 78.28 | 78.69 | 79.09 | 79.50 | 79.90 | 80.31 | 80.72 |
| Senegal                        | 66.64 | 67.04 | 67.45 | 67.85 | 68.26 | 68.68 | 69.09 | 69.51 | 69.94 |
| Seychelles                     | 73.80 | 73.92 | 74.04 | 74.16 | 74.29 | 74.41 | 74.53 | 74.65 | 74.77 |
| Sierra Leone                   | 57.87 | 58.27 | 58.68 | 59.08 | 59.49 | 59.89 | 60.29 | 60.70 | 61.10 |
| Singapore                      | 83.84 | 83.94 | 84.04 | 84.14 | 84.24 | 84.34 | 84.44 | 84.54 | 84.64 |
| Slovak Republic                | 77.20 | 77.44 | 77.68 | 77.92 | 78.16 | 78.40 | 78.64 | 78.89 | 79.14 |
| Slovenia                       | 81.14 | 81.44 | 81.73 | 82.03 | 82.33 | 82.63 | 82.93 | 83.23 | 83.53 |

|              |       |       |       |       |       |       |       |       |       |
|--------------|-------|-------|-------|-------|-------|-------|-------|-------|-------|
| Solomon      | 63.33 | 63.64 | 63.96 | 64.28 | 64.60 | 64.91 | 65.23 | 65.55 | 65.87 |
| Telonde      |       |       |       |       |       |       |       |       |       |
| South Africa | 63.04 | 63.65 | 64.25 | 64.86 | 65.47 | 66.07 | 66.68 | 67.29 | 67.89 |
| Spain        | 83.16 | 83.34 | 83.52 | 83.69 | 83.86 | 84.03 | 84.19 | 84.35 | 84.51 |
| Sri Lanka    | 77.40 | 77.68 | 77.95 | 78.23 | 78.51 | 78.78 | 79.06 | 79.33 | 79.61 |

(Continue to next page)

|                                | 2017  | 2018  | 2019  | 2020  | 2021  | 2022  | 2023  | 2024  | 2025  |
|--------------------------------|-------|-------|-------|-------|-------|-------|-------|-------|-------|
| (Continued from previous page) |       |       |       |       |       |       |       |       |       |
| Sudan                          | 68.60 | 68.90 | 69.19 | 69.47 | 69.74 | 70.01 | 70.27 | 70.52 | 70.76 |
| Suriname                       | 71.56 | 71.78 | 72.00 | 72.22 | 72.44 | 72.66 | 72.88 | 73.10 | 73.32 |
| Swaziland                      | 58.77 | 60.11 | 61.44 | 62.77 | 64.11 | 65.44 | 66.77 | 68.10 | 69.44 |
| Sweden                         | 82.02 | 82.00 | 81.97 | 81.95 | 81.92 | 81.90 | 81.87 | 81.85 | 81.82 |
| Switzerland                    | 83.30 | 83.42 | 83.55 | 83.67 | 83.79 | 83.92 | 84.04 | 84.16 | 84.29 |
| Tajikistan                     | 72.41 | 72.83 | 73.25 | 73.67 | 74.10 | 74.52 | 74.94 | 75.36 | 75.79 |
| Tanzania                       | 65.13 | 65.97 | 66.80 | 67.64 | 68.48 | 69.32 | 70.16 | 70.99 | 71.83 |
| Thailand                       | 77.84 | 77.98 | 78.12 | 78.25 | 78.39 | 78.53 | 78.66 | 78.80 | 78.94 |
| The Russian                    | 70.89 | 70.92 | 70.95 | 70.98 | 71.01 | 71.04 | 71.07 | 71.10 | 71.13 |
| Federation                     |       |       |       |       |       |       |       |       |       |
| Togo                           | 63.15 | 63.70 | 64.25 | 64.81 | 65.36 | 65.92 | 66.47 | 67.03 | 67.58 |
| Tonga                          | 70.39 | 70.48 | 70.57 | 70.66 | 70.75 | 70.84 | 70.94 | 71.03 | 71.12 |
| Trinidad and                   | 73.10 | 73.18 | 73.26 | 73.34 | 73.42 | 73.50 | 73.58 | 73.66 | 73.74 |
| Tobago                         |       |       |       |       |       |       |       |       |       |
| Tunisia                        | 77.62 | 77.81 | 78.05 | 78.32 | 78.65 | 79.02 | 79.46 | 79.96 | 80.53 |
| Turkey                         | 79.22 | 79.26 | 79.26 | 79.23 | 79.18 | 79.09 | 78.98 | 78.84 | 78.66 |
| Turkmenistan                   | 70.58 | 70.91 | 71.25 | 71.58 | 71.92 | 72.25 | 72.58 | 72.92 | 73.25 |
| Uganda                         | 62.86 | 63.52 | 64.18 | 64.84 | 65.50 | 66.16 | 66.81 | 67.47 | 68.13 |
| Ukraine                        | 72.42 | 72.74 | 73.07 | 73.39 | 73.72 | 74.05 | 74.38 | 74.71 | 75.05 |
| United Arab                    | 75.59 | 75.66 | 75.73 | 75.80 | 75.87 | 75.94 | 76.02 | 76.09 | 76.16 |
| Emirates                       |       |       |       |       |       |       |       |       |       |
| United                         | 80.94 | 80.98 | 81.03 | 81.07 | 81.11 | 81.15 | 81.19 | 81.23 | 81.28 |
| Kingdom                        |       |       |       |       |       |       |       |       |       |
| United States                  | 78.84 | 78.82 | 78.81 | 78.79 | 78.77 | 78.75 | 78.74 | 78.72 | 78.70 |

|                   |       |       |       |       |       |       |       |       |       |
|-------------------|-------|-------|-------|-------|-------|-------|-------|-------|-------|
| Uruguay           | 77.46 | 77.58 | 77.70 | 77.82 | 77.92 | 78.03 | 78.13 | 78.22 | 78.31 |
| US Virgin Islands | 74.68 | 74.74 | 74.79 | 74.84 | 74.88 | 74.93 | 74.97 | 75.00 | 75.04 |
| Uzbekistan        | 70.54 | 70.78 | 71.03 | 71.27 | 71.52 | 71.76 | 72.01 | 72.25 | 72.50 |
| Vanuatu           | 64.04 | 64.23 | 64.42 | 64.61 | 64.80 | 64.99 | 65.18 | 65.37 | 65.56 |
| Venezuela         | 75.87 | 76.00 | 76.12 | 76.25 | 76.38 | 76.50 | 76.63 | 76.75 | 76.88 |

(Continue to next page)

---

|                                | 2017          | 2018          | 2019          | 2020          | 2021          | 2022          | 2023          | 2024          | 2025          |
|--------------------------------|---------------|---------------|---------------|---------------|---------------|---------------|---------------|---------------|---------------|
| (Continued from previous page) |               |               |               |               |               |               |               |               |               |
| Vietnam                        | 74.79         | 75.02         | 75.26         | 75.50         | 75.73         | 75.97         | 76.20         | 76.44         | 76.67         |
|                                | (74.71-74.87) | (74.91-75.14) | (75.12-75.4)  | (75.34-75.65) | (75.56-75.91) | (75.77-76.16) | (75.99-76.41) | (76.21-76.66) | (76.44-76.91) |
| Zambia                         | 59.36         | 60.09         | 60.82         | 61.55         | 62.28         | 63.02         | 63.75         | 64.48         | 65.21         |
|                                | (58.76-59.96) | (58.81-61.37) | (58.73-62.92) | (58.52-64.58) | (58.21-66.35) | (57.81-68.22) | (57.31-70.18) | (56.74-72.22) | (56.08-74.34) |

---



Table S3 Projected global and regional Healthy Life Expectancy, 2017-2025 (95% confidence interval)

|                           | 2017  | 2018  | 2019  | 2020  | 2021  | 2022  | 2023  | 2024  | 2025  |
|---------------------------|-------|-------|-------|-------|-------|-------|-------|-------|-------|
| Afghanistan               | 49.79 | 50.08 | 50.38 | 50.68 | 50.97 | 51.27 | 51.56 | 51.86 | 52.16 |
| Albania                   | 67.77 | 67.94 | 68.1  | 68.27 | 68.44 | 68.61 | 68.77 | 68.94 | 69.11 |
| Algeria                   | 66.14 | 66.28 | 66.41 | 66.54 | 66.68 | 66.81 | 66.95 | 67.08 | 67.22 |
| Andorra                   | 71.20 | 71.20 | 71.20 | 71.20 | 71.21 | 71.21 | 71.21 | 71.21 | 71.21 |
| Angola                    | 56.92 | 57.55 | 58.17 | 58.8  | 59.43 | 60.06 | 60.68 | 61.31 | 61.94 |
| Antigua and<br>Barbuda    | 67.61 | 67.68 | 67.76 | 67.82 | 67.89 | 67.95 | 68.01 | 68.07 | 68.12 |
| Argentina                 | 67.37 | 67.52 | 67.66 | 67.81 | 67.95 | 68.1  | 68.25 | 68.39 | 68.54 |
| Armenia                   | 9.43  | 9.49  | 9.54  | 9.60  | 9.65  | 9.70  | 9.76  | 9.81  | 9.87  |
| Australia                 | 71.53 | 71.52 | 71.51 | 71.51 | 71.50 | 71.49 | 71.49 | 71.48 | 71.47 |
| Austria                   | 71.04 | 71.14 | 71.24 | 71.34 | 71.44 | 71.54 | 71.64 | 71.74 | 71.84 |
| Azerbaijan                | 63.72 | 64.05 | 64.38 | 64.71 | 65.04 | 65.38 | 65.71 | 66.06 | 66.40 |
| Bahamas                   | 64.96 | 65.05 | 65.14 | 65.23 | 65.32 | 65.41 | 65.51 | 65.6  | 65.69 |
| Bahrain                   | 65.55 | 65.74 | 65.91 | 66.09 | 66.25 | 66.42 | 66.57 | 66.72 | 66.86 |
| Bangladesh                | 63.14 | 63.51 | 63.88 | 64.26 | 64.63 | 65    | 65.37 | 65.75 | 66.12 |
| Barbados                  | 66.87 | 66.83 | 66.78 | 66.73 | 66.69 | 66.64 | 66.6  | 66.55 | 66.50 |
| Belarus                   | 64.42 | 64.73 | 65.03 | 65.34 | 65.65 | 65.96 | 66.26 | 66.57 | 66.88 |
| Belgium                   | 70.25 | 70.38 | 70.51 | 70.63 | 70.76 | 70.88 | 71.01 | 71.13 | 71.25 |
| Benin                     | 56.34 | 56.77 | 57.19 | 57.62 | 58.04 | 58.47 | 58.89 | 59.32 | 59.74 |
| Bhutan                    | 63.40 | 63.60 | 63.79 | 63.95 | 64.09 | 64.22 | 64.33 | 64.41 | 64.48 |
| Bolivia                   | 64.27 | 64.56 | 64.86 | 65.17 | 65.5  | 65.84 | 66.21 | 66.6  | 67.01 |
| Bosnia and<br>Herzegovina | 67.56 | 67.82 | 68.08 | 68.34 | 68.6  | 68.86 | 69.12 | 69.38 | 69.64 |
| Botswana                  | 57.14 | 57.57 | 57.86 | 57.98 | 57.94 | 57.69 | 57.24 | 56.55 | 55.61 |
| Brazil                    | 65.61 | 65.71 | 65.79 | 65.85 | 65.89 | 65.89 | 65.87 | 65.82 | 65.74 |
| Bulgaria                  | 65.76 | 65.92 | 66.07 | 66.23 | 66.39 | 66.55 | 66.7  | 66.86 | 67.01 |
| Burkina<br>Faso           | 53.35 | 53.76 | 54.18 | 54.59 | 55.01 | 55.42 | 55.84 | 56.25 | 56.67 |

|                                | 2017  | 2018  | 2019  | 2020  | 2021  | 2022  | 2023  | 2024  | 2025  |
|--------------------------------|-------|-------|-------|-------|-------|-------|-------|-------|-------|
| (Continued from previous page) |       |       |       |       |       |       |       |       |       |
| Burundi                        | 53.88 | 54.25 | 54.62 | 54.99 | 55.36 | 55.73 | 56.10 | 56.47 | 56.83 |
| Cambodia                       | 60.5  | 60.89 | 61.29 | 61.69 | 62.09 | 62.51 | 62.93 | 63.35 | 63.78 |
| Cameroon                       | 52.97 | 53.45 | 53.93 | 54.40 | 54.88 | 55.36 | 55.84 | 56.32 | 56.79 |
| Canada                         | 71.25 | 71.31 | 71.36 | 71.41 | 71.47 | 71.52 | 71.57 | 71.63 | 71.68 |
| Cape Verde                     | 64.50 | 64.74 | 64.97 | 65.21 | 65.44 | 65.68 | 65.92 | 66.15 | 66.39 |
| Chad                           | 52.18 | 52.68 | 53.17 | 53.67 | 54.16 | 54.66 | 55.15 | 55.65 | 56.14 |
| Chile                          | 70.10 | 70.30 | 70.49 | 70.69 | 70.89 | 71.09 | 71.29 | 71.50 | 71.70 |
| Colombia                       | 69.34 | 69.58 | 69.81 | 70.05 | 70.29 | 70.52 | 70.75 | 70.98 | 71.20 |
| China                          | 68.13 | 68.41 | 68.68 | 68.95 | 69.21 | 69.46 | 69.72 | 69.96 | 70.21 |
| Comoros                        | 59.68 | 59.99 | 60.36 | 60.69 | 61.05 | 61.38 | 61.74 | 62.08 | 62.43 |
| Congo gold                     | 55.75 | 56.33 | 56.9  | 57.48 | 58.05 | 58.63 | 59.20 | 59.78 | 60.36 |
| Costa Rica                     | 71.28 | 71.41 | 71.53 | 71.65 | 71.77 | 71.89 | 72.02 | 72.14 | 72.26 |
| Coted I<br>voire               | 52.77 | 53.38 | 54.00 | 54.62 | 55.24 | 55.85 | 56.47 | 57.09 | 57.71 |
| Croatia                        | 67.48 | 67.55 | 67.62 | 67.69 | 67.75 | 67.82 | 67.89 | 67.96 | 68.03 |
| Cuba                           | 69.29 | 69.38 | 69.48 | 69.58 | 69.68 | 69.78 | 69.87 | 69.97 | 70.07 |
| Cyprus                         | 69.77 | 69.3  | 68.77 | 68.19 | 67.55 | 66.87 | 66.13 | 65.33 | 64.49 |
| Czech<br>Republic              | 68.3  | 68.49 | 68.68 | 68.88 | 69.07 | 69.26 | 69.45 | 69.65 | 69.84 |
| Denmark                        | 69.93 | 69.99 | 70.04 | 70.09 | 70.15 | 70.20 | 70.25 | 70.31 | 70.36 |
| Djibouti                       | 59.19 | 59.92 | 60.71 | 61.62 | 62.62 | 63.73 | 64.96 | 66.31 | 67.79 |
| DominicanR<br>epublic          | 63.99 | 63.91 | 63.82 | 63.71 | 63.60 | 63.48 | 63.35 | 63.21 | 63.06 |
| Timor-Leste                    | 65.03 | 65.62 | 66.21 | 66.80 | 67.39 | 67.98 | 68.57 | 69.16 | 69.76 |
| El Salvador                    | 66.60 | 66.72 | 66.82 | 66.92 | 67.01 | 67.09 | 67.17 | 67.23 | 67.29 |
| Equatorial<br>Guinea           | 57.23 | 57.80 | 58.37 | 58.94 | 59.51 | 60.08 | 60.65 | 61.21 | 61.78 |
| Eritrea                        | 56.70 | 57.04 | 57.38 | 57.72 | 58.06 | 58.39 | 58.73 | 59.07 | 59.41 |

|         |       |       |       |       |       |       |       |       |       |
|---------|-------|-------|-------|-------|-------|-------|-------|-------|-------|
| Estonia | 67.92 | 68.29 | 68.67 | 69.04 | 69.41 | 69.78 | 70.15 | 70.52 | 70.89 |
|---------|-------|-------|-------|-------|-------|-------|-------|-------|-------|

(Continue to next page)

---

|  | 2017 | 2018 | 2019 | 2020 | 2021 | 2022 | 2023 | 2024 | 2025 |
|--|------|------|------|------|------|------|------|------|------|
|--|------|------|------|------|------|------|------|------|------|

---

(Continued from previous page)

|           |       |       |       |       |       |       |       |       |       |
|-----------|-------|-------|-------|-------|-------|-------|-------|-------|-------|
| Ethiopia  | 57.21 | 57.22 | 57.23 | 57.24 | 57.25 | 57.26 | 57.26 | 57.27 | 57.28 |
| Fiji      | 57.21 | 57.22 | 57.23 | 57.24 | 57.25 | 57.26 | 57.26 | 57.27 | 57.28 |
| Finland   | 70.76 | 71.00 | 71.25 | 71.51 | 71.77 | 72.03 | 72.30 | 72.58 | 72.85 |
| France    | 71.81 | 71.92 | 72.01 | 72.11 | 72.19 | 72.28 | 72.35 | 72.43 | 72.49 |
| Gabon     | 58.14 | 58.70 | 59.26 | 59.81 | 60.37 | 60.93 | 61.48 | 62.04 | 62.60 |
| Gambia    | 58.58 | 58.9  | 59.24 | 59.58 | 59.93 | 60.30 | 60.67 | 61.06 | 61.45 |
| Germany   | 70.31 | 70.38 | 70.45 | 70.52 | 70.59 | 70.67 | 70.74 | 70.81 | 70.88 |
| Ghana     | 58.44 | 58.97 | 59.49 | 60.02 | 60.54 | 61.07 | 61.59 | 62.11 | 62.64 |
| Greece    | 70.71 | 70.79 | 70.87 | 70.94 | 71.01 | 71.07 | 71.13 | 71.19 | 71.25 |
| Guatemala | 64.05 | 64.22 | 64.39 | 64.55 | 64.71 | 64.86 | 65.00 | 65.13 | 65.26 |
| Guinea    | 53.11 | 53.50 | 53.88 | 54.26 | 54.65 | 55.03 | 55.41 | 55.79 | 56.18 |
| Guyana    | 59.79 | 60.41 | 61.03 | 61.65 | 62.28 | 62.90 | 63.52 | 64.14 | 64.77 |
| Honduras  | 64.75 | 64.96 | 65.18 | 65.40 | 65.61 | 65.83 | 66.04 | 66.26 | 66.48 |
| Hungary   | 65.91 | 66.00 | 66.09 | 66.18 | 66.27 | 66.36 | 66.45 | 66.55 | 66.64 |
| Iceland   | 71.51 | 71.54 | 71.56 | 71.59 | 71.62 | 71.65 | 71.68 | 71.70 | 71.73 |
| India     | 59.31 | 59.74 | 60.20 | 60.69 | 61.19 | 61.72 | 62.28 | 62.87 | 63.48 |
| Indonesia | 63.16 | 63.37 | 63.58 | 63.79 | 64.00 | 64.20 | 64.40 | 64.60 | 64.80 |
| Iraq      | 57.43 | 57.43 | 57.43 | 57.43 | 57.43 | 57.43 | 57.43 | 57.43 | 57.43 |
| Ireland   | 70.47 | 70.49 | 70.51 | 70.53 | 70.55 | 70.57 | 70.59 | 70.61 | 70.63 |
| Iran      | 64.99 | 65.21 | 65.44 | 65.66 | 65.89 | 66.11 | 66.34 | 66.56 | 66.79 |
| Israel    | 71.64 | 71.84 | 72.05 | 72.25 | 72.45 | 72.66 | 72.86 | 73.07 | 73.28 |
| Italy     | 71.80 | 71.80 | 71.80 | 71.81 | 71.81 | 71.81 | 71.81 | 71.81 | 71.81 |
| Jamaica   | 65.42 | 65.51 | 65.60 | 65.69 | 65.79 | 65.89 | 66.00 | 66.12 | 66.24 |

|        |       |       |       |       |       |       |       |       |       |
|--------|-------|-------|-------|-------|-------|-------|-------|-------|-------|
| Japan  | 73.25 | 73.34 | 73.42 | 73.50 | 73.57 | 73.63 | 73.69 | 73.75 | 73.79 |
| Jordan | 64.84 | 64.57 | 64.30 | 64.03 | 63.77 | 63.50 | 63.23 | 62.96 | 62.70 |

(Continue to next page)

|                                | 2017          | 2018          | 2019          | 2020          | 2021          | 2022          | 2023          | 2024          | 2025          |
|--------------------------------|---------------|---------------|---------------|---------------|---------------|---------------|---------------|---------------|---------------|
| (Continued from previous page) |               |               |               |               |               |               |               |               |               |
| Kazakhstan                     | 62.62         | 62.44         | 62.13         | 61.65         | 61.00         | 60.18         | 59.15         | 57.91         | 56.46         |
| Kenya                          | 59.03         | 59.48         | 59.92         | 60.37         | 60.81         | 61.25         | 61.70         | 62.14         | 62.59         |
| Kiribati                       | 54.21         | 54.40         | 54.59         | 54.78         | 54.98         | 55.17         | 55.36         | 55.55         | 55.74         |
| Kuwait                         | 68.24         | 68.23         | 68.23         | 68.23         | 68.23         | 68.22         | 68.22         | 68.22         | 68.22         |
|                                | (67.87-68.61) | (67.41-69.06) | (66.85-69.62) | (66.20-70.26) | (65.48-70.97) | (64.69-71.75) | (63.84-72.60) | (62.93-73.50) | (61.97-74.46) |
| Kyrgyzstan                     | 62.65         | 62.84         | 63.04         | 63.23         | 63.42         | 63.62         | 63.81         | 64.01         | 64.20         |
|                                | (62.37-62.93) | (62.23-63.45) | (62.03-64.05) | (61.76-64.70) | (61.45-65.40) | (61.08-66.15) | (60.67-66.95) | (60.23-67.79) | (59.74-68.66) |
| Laos                           | 59.52         | 59.96         | 60.40         | 60.84         | 61.28         | 61.72         | 62.16         | 62.60         | 63.04         |
|                                | (59.36-59.68) | (59.61-60.31) | (59.82-60.98) | (60.00-61.68) | (60.15-62.41) | (60.27-63.17) | (60.36-63.95) | (60.43-64.76) | (60.48-65.59) |
| Lebanon                        | 68.29         | 68.33         | 68.37         | 68.41         | 68.45         | 68.49         | 68.53         | 68.57         | 68.61         |
|                                | (67.67-68.90) | (67.64-69.01) | (67.55-69.19) | (67.39-69.42) | (67.18-69.71) | (66.93-70.05) | (66.64-70.41) | (66.33-70.81) | (65.99-71.23) |
| Lesotho                        | 44.45         | 45.09         | 45.72         | 46.35         | 46.99         | 47.62         | 48.26         | 48.89         | 49.52         |
|                                | (43.76-45.15) | (43.54-46.64) | (43.13-48.31) | (42.56-50.15) | (41.85-52.13) | (41.01-54.23) | (40.06-56.46) | (38.99-58.79) | (37.82-61.22) |
| Liberia                        | 55.67         | 56.25         | 56.84         | 57.42         | 58.00         | 58.58         | 59.16         | 59.74         | 60.33         |
|                                | (53.76-57.58) | (54.33-58.17) | (54.91-58.76) | (55.48-59.35) | (56.05-59.95) | (56.62-60.54) | (57.2-61.13)  | (57.77-61.72) | (58.34-62.31) |
| Lithuania                      | 65.41         | 65.68         | 66.01         | 66.04         | 66.24         | 66.44         | 66.65         | 66.85         | 67.05         |
|                                | (64.74-66.07) | (64.74-66.62) | (64.86-67.17) | (64.71-67.37) | (64.76-67.73) | (64.82-68.07) | (64.89-68.40) | (64.97-68.73) | (65.05-69.04) |
| Luxembourg                     | 71.04         | 71.12         | 71.20         | 71.28         | 71.37         | 71.45         | 71.53         | 71.61         | 71.69         |
|                                | (70.87-71.21) | (70.76-71.48) | (70.62-71.79) | (70.44-72.13) | (70.24-72.49) | (70.01-72.89) | (69.75-73.30) | (69.48-73.74) | (69.18-74.2)  |
| Macedonia                      | 65.68         | 65.77         | 65.86         | 65.95         | 66.03         | 66.10         | 66.17         | 66.24         | 66.31         |
|                                | (65.49-65.87) | (65.51-66.04) | (65.54-66.19) | (65.57-66.32) | (65.60-66.45) | (65.64-66.56) | (65.68-66.67) | (65.71-66.78) | (65.74-66.87) |
| Malawi                         | 53.58         | 54.61         | 55.82         | 57.23         | 58.82         | 60.63         | 62.65         | 64.89         | 67.37         |

|              |               |               |               |               |               |               |               |               |               |
|--------------|---------------|---------------|---------------|---------------|---------------|---------------|---------------|---------------|---------------|
|              | (53.27-53.89) | (53.92-55.3)  | (54.67-56.98) | (55.54-58.91) | (56.54-61.11) | (57.69-63.57) | (59.00-66.29) | (60.49-69.29) | (62.16-72.57) |
| Malaysia     | 66.64         | 66.87         | 67.09         | 67.31         | 67.53         | 67.76         | 67.98         | 68.20         | 68.42         |
|              | (66.57-66.72) | (66.7-67.03)  | (66.81-67.37) | (66.91-67.72) | (66.99-68.08) | (67.05-68.46) | (67.11-68.85) | (67.15-69.25) | (67.18-69.66) |
| Maldives     | 69.34         | 69.55         | 69.76         | 69.97         | 70.18         | 70.39         | 70.60         | 70.81         | 71.02         |
|              | (68.70-69.98) | (68.65-70.45) | (68.53-70.98) | (68.37-71.57) | (68.16-72.19) | (67.92-72.86) | (67.64-73.56) | (67.33-74.28) | (66.99-75.04) |
| Mali         | 54.50         | 54.99         | 55.49         | 55.98         | 56.48         | 56.97         | 57.46         | 57.96         | 58.45         |
|              | (53.69-55.31) | (54.18-55.81) | (54.67-56.31) | (55.16-56.80) | (55.65-57.30) | (56.14-57.80) | (56.63-58.30) | (57.12-58.80) | (57.61-59.30) |
| Malta        | 71.00         | 71.08         | 71.15         | 71.23         | 71.30         | 71.38         | 71.45         | 71.53         | 71.61         |
|              | (70.85-71.16) | (70.72-71.43) | (70.56-71.75) | (70.36-72.10) | (70.13-72.48) | (69.87-72.89) | (69.58-73.33) | (69.27-73.79) | (68.94-74.27) |
| Mauritania   | 61.35         | 61.71         | 62.06         | 62.42         | 62.78         | 63.14         | 63.50         | 63.86         | 64.22         |
|              | (61.15-61.54) | (61.43-61.98) | (61.73-62.40) | (62.03-62.81) | (62.35-63.22) | (62.66-63.62) | (62.98-64.02) | (63.31-64.41) | (63.64-64.81) |
| Mexico       | 67.24         | 67.42         | 67.60         | 67.78         | 67.95         | 68.13         | 68.31         | 68.49         | 68.67         |
|              | (66.95-67.53) | (66.81-68.03) | (66.59-68.60) | (66.33-69.23) | (66.01-69.90) | (65.65-70.62) | (65.24-71.38) | (64.79-72.19) | (64.31-73.02) |
| Mongolia     | 60.10         | 60.29         | 60.48         | 60.68         | 60.87         | 61.06         | 61.25         | 61.44         | 61.64         |
|              | (59.87-60.33) | (59.78-60.8)  | (59.63-61.34) | (59.43-61.93) | (59.17-62.56) | (58.88-63.24) | (58.55-63.96) | (58.18-64.71) | (57.78-65.49) |
| Montenegro   | 67.24         | 67.36         | 67.47         | 67.59         | 67.70         | 67.82         | 67.93         | 68.04         | 68.16         |
|              | (67.13-67.35) | (67.11-67.61) | (67.05-67.89) | (66.98-68.20) | (66.87-68.53) | (66.75-68.88) | (66.61-69.25) | (66.45-69.64) | (66.28-70.04) |
| Morocco      | 64.17         | 64.38         | 64.59         | 64.80         | 65.00         | 65.21         | 65.42         | 65.63         | 65.84         |
|              | (64.08-64.26) | (64.25-64.5)  | (64.41-64.77) | (64.54-65.05) | (64.67-65.34) | (64.79-65.63) | (64.90-65.94) | (65.00-66.26) | (65.10-66.58) |
| Mozambique   | 52.96         | 53.86         | 54.79         | 55.73         | 56.68         | 57.65         | 58.62         | 59.59         | 60.56         |
| <sup>e</sup> | (52.47-53.45) | (52.77-54.96) | (52.96-56.62) | (53.05-58.41) | (53.06-60.31) | (52.98-62.31) | (52.83-64.40) | (52.60-66.58) | (52.30-68.82) |

(Continue to next page)

|                                | 2017          | 2018          | 2019          | 2020          | 2021          | 2022          | 2023          | 2024          | 2025          |
|--------------------------------|---------------|---------------|---------------|---------------|---------------|---------------|---------------|---------------|---------------|
| (Continued from previous page) | 57.02         | 57.62         | 58.28         | 59.00         | 59.79         | 60.63         | 61.55         | 62.54         | 63.60         |
| Namibia                        | (56.46-57.57) | (56.38-58.86) | (56.21-60.36) | (55.96-62.04) | (55.67-63.90) | (55.34-65.93) | (54.98-68.12) | (54.61-70.47) | (54.23-72.97) |
| Netherlands                    | 70.71         | 70.71         | 70.71         | 70.71         | 70.72         | 70.72         | 70.72         | 70.72         | 70.73         |
|                                | (70.59-70.83) | (70.44-70.98) | (70.26-71.17) | (70.05-71.38) | (69.81-71.62) | (69.56-71.88) | (69.28-72.16) | (68.99-72.46) | (68.67-72.78) |

|                  |                        |                        |                        |                        |                        |                        |                        |                        |                        |
|------------------|------------------------|------------------------|------------------------|------------------------|------------------------|------------------------|------------------------|------------------------|------------------------|
| new Zealand      | 70.82<br>(70.65-70.99) | 70.84<br>(70.55-71.13) | 70.86<br>(70.43-71.29) | 70.88<br>(70.31-71.45) | 70.90<br>(70.17-71.63) | 70.92<br>(70.02-71.82) | 70.94<br>(69.86-72.02) | 70.96<br>(69.69-72.23) | 70.98<br>(69.51-72.45) |
| Nicaragua        | 69.13<br>(68.09-70.17) | 69.32<br>(68.2-70.44)  | 69.51<br>(68.31-70.70) | 69.70<br>(68.43-70.96) | 69.89<br>(68.56-71.22) | 70.08<br>(68.68-71.47) | 70.26<br>(68.81-71.72) | 70.45<br>(68.94-71.97) | 70.64<br>(69.07-72.21) |
| Niger            | 54.44<br>(54.27-54.60) | 54.85<br>(54.55-55.15) | 55.27<br>(54.79-55.75) | 55.69<br>(55.00-56.38) | 56.11<br>(55.18-57.04) | 56.52<br>(55.33-57.72) | 56.94<br>(55.46-58.42) | 57.36<br>(55.58-59.14) | 57.78<br>(55.67-59.88) |
| Nigeria          | 57.16<br>(56.81-57.51) | 58.04<br>(57.36-58.72) | 58.92<br>(57.85-59.99) | 59.79<br>(58.28-61.31) | 60.67<br>(58.67-62.68) | 61.55<br>(59.02-64.09) | 62.43<br>(59.32-65.54) | 63.31<br>(59.59-67.03) | 64.19<br>(59.82-68.55) |
| Norway           | 71.51<br>(71.39-71.64) | 71.54<br>(71.27-71.81) | 71.56<br>(71.11-72.01) | 71.58<br>(70.92-72.24) | 71.61<br>(70.71-72.50) | 71.63<br>(70.48-72.78) | 71.65<br>(70.22-73.08) | 71.67<br>(69.95-73.39) | 71.70<br>(69.66-73.73) |
| Pakistan         | 58.93<br>(58.28-59.59) | 59.26<br>(58.41-60.1)  | 59.58<br>(58.52-60.65) | 59.91<br>(58.60-61.21) | 60.23<br>(58.66-61.80) | 60.56<br>(58.71-62.40) | 60.88<br>(58.73-63.03) | 61.20<br>(58.75-63.66) | 61.53<br>(58.74-64.31) |
| Panama           | 69.64<br>(69.52-69.76) | 69.91<br>(69.65-70.18) | 70.20<br>(69.76-70.65) | 70.51<br>(69.86-71.16) | 70.83<br>(69.95-71.71) | 71.17<br>(70.04-72.30) | 71.52<br>(70.12-72.93) | 71.89<br>(70.20-73.59) | 72.28<br>(70.28-74.29) |
| Papua New Guinea | 53.40<br>(52.93-53.88) | 53.69<br>(53.06-54.32) | 53.98<br>(53.17-54.78) | 54.26<br>(53.26-55.26) | 54.55<br>(53.34-55.76) | 54.83<br>(53.40-56.27) | 55.12<br>(53.45-56.79) | 55.41<br>(53.48-57.33) | 55.69<br>(53.50-57.88) |
| Paraguay         | 65.06<br>(64.90-65.21) | 65.16<br>(64.92-65.41) | 65.27<br>(64.92-65.62) | 65.38<br>(64.91-65.85) | 65.49<br>(64.89-66.08) | 65.59<br>(64.86-66.33) | 65.70<br>(64.82-66.58) | 65.81<br>(64.77-66.85) | 65.92<br>(64.72-67.12) |
| Peru             | 70.10<br>(69.86-70.34) | 70.35<br>(69.84-70.87) | 70.61<br>(69.76-71.46) | 70.86<br>(69.63-72.10) | 71.12<br>(69.45-72.78) | 71.37<br>(69.24-73.51) | 71.63<br>(68.99-74.27) | 71.88<br>(68.70-75.06) | 72.14<br>(68.39-75.89) |
| Philippines      | 61.86<br>(61.66-62.05) | 62.06<br>(61.73-62.39) | 62.27<br>(61.77-62.76) | 62.48<br>(61.80-63.15) | 62.68<br>(61.81-63.56) | 62.89<br>(61.80-63.98) | 63.10<br>(61.77-64.42) | 63.30<br>(61.73-64.87) | 63.51<br>(61.68-65.34) |
| Poland           | 67.78<br>(67.48-68.08) | 67.96<br>(67.54-68.38) | 68.14<br>(67.62-68.65) | 68.31<br>(67.72-68.90) | 68.48<br>(67.82-69.14) | 68.65<br>(67.92-69.37) | 68.81<br>(68.02-69.59) | 68.96<br>(68.13-69.80) | 69.12<br>(68.23-70.01) |
| Portugal         | 70.63<br>(70.50-70.76) | 70.72<br>(70.53-70.92) | 70.82<br>(70.54-71.10) | 70.92<br>(70.52-71.31) | 71.01<br>(70.50-71.53) | 71.11<br>(70.46-71.76) | 71.20<br>(70.41-72.00) | 71.30<br>(70.34-72.26) | 71.40<br>(70.27-72.52) |
| Qatar            | 68.14                  | 68.13                  | 68.12                  | 68.11                  | 68.09                  | 68.08                  | 68.07                  | 68.06                  | 68.05                  |

(67.95-68.33) (67.71-68.54) (67.42-68.81) (67.09-69.13) (66.71-69.48) (66.31-69.86) (65.87-70.28) (65.40-70.72) (64.90-71.19)

|                              |                        |                        |                        |                        |                        |                        |                        |                        |                        |
|------------------------------|------------------------|------------------------|------------------------|------------------------|------------------------|------------------------|------------------------|------------------------|------------------------|
| Republic of<br>Congo         | 53.50<br>(52.61-54.38) | 54.18<br>(53.26-55.11) | 54.87<br>(53.86-55.88) | 55.56<br>(54.41-56.71) | 56.25<br>(54.91-57.59) | 56.94<br>(55.37-58.50) | 57.62<br>(55.79-59.46) | 58.31<br>(56.18-60.45) | 59.00<br>(56.54-61.46) |
| Republic of<br>Guinea-Bissau | 51.94<br>(51.35-52.53) | 52.52<br>(51.68-53.35) | 53.12<br>(52.09-54.14) | 53.73<br>(52.55-54.92) | 54.37<br>(53.05-55.69) | 55.03<br>(53.58-56.48) | 55.71<br>(54.15-57.27) | 56.41<br>(54.74-58.08) | 57.13<br>(55.35-58.90) |
| Republic of<br>Korea         | 70.84<br>(70.69-71.00) | 70.93<br>(70.58-71.27) | 71.01<br>(70.43-71.58) | 71.09<br>(70.25-71.92) | 71.17<br>(70.04-72.30) | 71.25<br>(69.80-72.70) | 71.33<br>(69.54-73.13) | 71.41<br>(69.25-73.58) | 71.50<br>(68.94-74.06) |
| Romania                      | 65.91<br>(65.64-66.17) | 66.17<br>(65.74-66.6)  | 66.37<br>(65.87-66.87) | 66.53<br>(66.03-67.04) | 66.76<br>(66.26-67.27) | 67.06<br>(66.55-67.58) | 67.38<br>(66.80-67.95) | 67.63<br>(66.99-68.28) | 67.83<br>(67.16-68.50) |
| Rwanda                       | 59.79<br>(58.86-60.72) | 60.14<br>(58.69-61.59) | 60.49<br>(58.28-62.7)  | 60.84<br>(57.71-63.97) | 61.19<br>(57.01-65.38) | 61.54<br>(56.19-66.9)  | 61.89<br>(55.28-68.51) | 62.25<br>(54.28-70.22) | 62.60<br>(53.19-72.01) |
| Saint Lucia                  | 66.45<br>(66.17-66.73) | 66.51<br>(66.11-66.9)  | 66.56<br>(66.08-67.05) | 66.61<br>(66.06-67.17) | 66.66<br>(66.03-67.29) | 66.70<br>(66.01-67.38) | 66.73<br>(65.99-67.47) | 66.76<br>(65.97-67.55) | 66.78<br>(65.94-67.62) |

(Continue to next page)

---

|  | 2017 | 2018 | 2019 | 2020 | 2021 | 2022 | 2023 | 2024 | 2025 |
|--|------|------|------|------|------|------|------|------|------|
|--|------|------|------|------|------|------|------|------|------|

---

(Continued from previous page)

|                          |                        |                        |                        |                        |                        |                        |                        |                        |                        |
|--------------------------|------------------------|------------------------|------------------------|------------------------|------------------------|------------------------|------------------------|------------------------|------------------------|
| Saint<br>Vincent         | 71.73<br>(71.34-72.11) | 71.82<br>(71.27-72.36) | 71.91<br>(71.24-72.58) | 72.00<br>(71.23-72.78) | 72.10<br>(71.24-72.97) | 72.21<br>(71.26-73.15) | 72.31<br>(71.29-73.33) | 72.42<br>(71.33-73.51) | 72.53<br>(71.38-73.69) |
| Sao Tome<br>and Principe | 61.91<br>(61.56-62.27) | 62.18<br>(61.57-62.78) | 62.44<br>(61.55-63.34) | 62.71<br>(61.49-63.92) | 62.97<br>(61.40-64.54) | 63.24<br>(61.28-65.19) | 63.50<br>(61.13-65.87) | 63.77<br>(60.96-66.57) | 64.03<br>(60.77-67.29) |
| Saudi<br>Arabia          | 66.68<br>(66.47-66.88) | 67.01<br>(66.68-67.33) | 67.34<br>(66.88-67.80) | 67.67<br>(67.06-68.28) | 68.00<br>(67.23-68.78) | 68.33<br>(67.38-69.28) | 68.66<br>(67.52-69.81) | 69.00<br>(67.65-70.34) | 69.33<br>(67.77-70.88) |
| Senegal                  | 58.30<br>(58.09-58.52) | 58.72<br>(58.42-59.03) | 59.15<br>(58.77-59.52) | 59.58<br>(59.15-60.02) | 60.02<br>(59.54-60.51) | 60.47<br>(59.94-61.00) | 60.92<br>(60.35-61.50) | 61.39<br>(60.77-62.00) | 61.86<br>(61.21-62.51) |
| Seychelles               | 65.08<br>(64.95-65.20) | 65.20<br>(64.94-65.47) | 65.33<br>(64.90-65.77) | 65.46<br>(64.83-66.09) | 65.59<br>(64.74-66.43) | 65.72<br>(64.63-66.80) | 65.84<br>(64.50-67.18) | 65.97<br>(64.36-67.58) | 66.10<br>(64.20-68.00) |

|                 |               |               |               |               |               |               |               |               |               |
|-----------------|---------------|---------------|---------------|---------------|---------------|---------------|---------------|---------------|---------------|
| Sierra Leone    | 50.55         | 50.93         | 51.30         | 51.68         | 52.06         | 52.43         | 52.81         | 53.18         | 53.56         |
|                 | (48.54-52.57) | (48.9-52.95)  | (49.27-53.34) | (49.64-53.72) | (50.00-54.11) | (50.37-54.50) | (50.74-54.88) | (51.10-55.27) | (51.47-55.65) |
| Singapore       | 73.74         | 73.86         | 73.98         | 74.10         | 74.22         | 74.33         | 74.45         | 74.57         | 74.69         |
|                 | (73.59-73.90) | (73.58-74.14) | (73.56-74.40) | (73.51-74.69) | (73.44-74.99) | (73.35-75.31) | (73.26-75.65) | (73.14-76.00) | (73.02-76.36) |
| Slovak Republic | 67.07         | 67.27         | 67.46         | 67.66         | 67.86         | 68.05         | 68.25         | 68.46         | 68.66         |
|                 | (66.88-67.27) | (66.99-67.55) | (67.12-67.80) | (67.26-68.05) | (67.41-68.30) | (67.57-68.54) | (67.73-68.78) | (67.90-69.02) | (68.07-69.25) |
| Slovenia        | 69.56         | 69.79         | 70.02         | 70.26         | 70.49         | 70.73         | 70.97         | 71.21         | 71.44         |
|                 | (69.36-69.75) | (69.52-70.06) | (69.69-70.36) | (69.87-70.65) | (70.06-70.93) | (70.25-71.21) | (70.45-71.49) | (70.65-71.76) | (70.85-72.04) |
| Solomon Islands | 55.54         | 55.8          | 56.06         | 56.32         | 56.58         | 56.84         | 57.1          | 57.37         | 57.63         |
|                 | (55.30-55.77) | (55.40-56.20) | (55.43-56.69) | (55.41-57.23) | (55.36-57.80) | (55.28-58.41) | (55.17-59.04) | (55.03-59.70) | (54.87-60.38) |
| South Africa    | 54.31         | 54.78         | 55.26         | 55.73         | 56.21         | 56.69         | 57.16         | 57.64         | 58.11         |
|                 | (53.57-55.04) | (53.13-56.43) | (52.49-58.02) | (51.69-59.78) | (50.73-61.69) | (49.64-63.73) | (48.42-65.90) | (47.09-68.19) | (45.65-70.58) |
| Spain           | 83.16         | 83.34         | 83.52         | 83.69         | 83.86         | 84.03         | 84.19         | 84.35         | 84.51         |
|                 | (82.99-83.32) | (83.10-83.58) | (83.22-83.81) | (83.35-84.03) | (83.48-84.24) | (83.61-84.44) | (83.74-84.64) | (83.87-84.83) | (84.00-85.01) |
| Sri Lanka       | 67.56         | 67.79         | 68.03         | 68.26         | 68.49         | 68.72         | 68.96         | 69.19         | 69.42         |
|                 | (65.60-69.52) | (65.82-69.77) | (66.04-70.01) | (66.27-70.25) | (66.49-70.49) | (66.71-70.73) | (66.94-70.98) | (67.16-71.22) | (67.38-71.46) |
| Sudan           | 58.43         | 58.67         | 58.91         | 59.14         | 59.37         | 59.59         | 59.80         | 60.00         | 60.20         |
|                 | (58.07-58.78) | (58.17-59.17) | (58.30-59.53) | (58.44-59.86) | (58.58-60.17) | (58.72-60.47) | (58.86-60.75) | (58.99-61.02) | (59.13-61.28) |
| Suriname        | 62.43         | 62.62         | 62.81         | 63.00         | 63.19         | 63.38         | 63.57         | 63.75         | 63.94         |
|                 | (62.27-62.60) | (62.26-62.99) | (62.20-63.42) | (62.10-63.90) | (61.97-64.40) | (61.82-64.94) | (61.63-65.50) | (61.42-66.09) | (61.18-66.71) |
| Swaziland       | 50.60         | 51.53         | 52.37         | 53.13         | 53.76         | 54.26         | 54.61         | 54.78         | 54.76         |
|                 | (49.83-51.38) | (49.79-53.27) | (49.46-55.28) | (48.87-57.38) | (48.00-59.53) | (46.85-61.68) | (45.41-63.81) | (43.68-65.89) | (41.63-67.89) |
| Sweden          | 70.92         | 70.95         | 70.92         | 70.89         | 70.90         | 70.90         | 70.87         | 70.85         | 70.84         |
|                 | (70.83-71.01) | (70.74-71.15) | (70.63-71.21) | (70.52-71.27) | (70.41-71.38) | (70.28-71.52) | (70.12-71.62) | (69.97-71.73) | (69.81-71.87) |
| Switzerland     | 72.10         | 72.27         | 72.43         | 72.59         | 72.75         | 72.90         | 73.06         | 73.21         | 73.36         |
|                 | (71.95-72.25) | (72.06-72.47) | (72.17-72.68) | (72.3-72.88)  | (72.42-73.08) | (72.55-73.26) | (72.67-73.45) | (72.80-73.62) | (72.92-73.8)  |
| Tajikistan      | 63.70         | 64.07         | 64.43         | 64.79         | 65.16         | 65.52         | 65.89         | 66.25         | 66.61         |

(63.21-64.20) (63.57-64.57) (63.93-64.93) (64.29-65.30) (64.65-65.67) (65.01-66.03) (65.37-66.40) (65.73-66.77) (66.09-67.13)

|                        |               |               |               |               |               |               |               |               |               |
|------------------------|---------------|---------------|---------------|---------------|---------------|---------------|---------------|---------------|---------------|
| Tanzania               | 57.26         | 57.96         | 58.64         | 59.28         | 59.89         | 60.45         | 60.96         | 61.42         | 61.82         |
|                        | (56.95-57.56) | (57.27-58.64) | (57.49-59.78) | (57.60-60.96) | (57.62-62.16) | (57.53-63.37) | (57.34-64.59) | (57.05-65.80) | (56.65-66.99) |
| Thailand               | 68.22         | 68.51         | 68.79         | 69.08         | 69.37         | 69.66         | 69.96         | 70.25         | 70.55         |
|                        | (67.98-68.46) | (68.17-68.84) | (68.38-69.20) | (68.61-69.55) | (68.84-69.90) | (69.09-70.24) | (69.33-70.58) | (69.58-70.92) | (69.84-71.25) |
| The Russian Federation | 62.06         | 62.21         | 62.36         | 62.51         | 62.65         | 62.80         | 62.95         | 63.10         | 63.25         |
|                        | (61.11-63.01) | (60.13-64.29) | (58.90-65.81) | (57.47-67.54) | (55.86-69.45) | (54.08-71.52) | (52.15-73.75) | (50.07-76.13) | (47.87-78.63) |

(Continue to next page)

---

|                                | 2017          | 2018          | 2019          | 2020          | 2021          | 2022          | 2023          | 2024          | 2025          |
|--------------------------------|---------------|---------------|---------------|---------------|---------------|---------------|---------------|---------------|---------------|
| (Continued from previous page) |               |               |               |               |               |               |               |               |               |
| Togo                           | 55.37         | 55.87         | 56.36         | 56.86         | 57.35         | 57.85         | 58.35         | 58.84         | 59.34         |
|                                | (54.92-55.82) | (55.05-56.68) | (55.13-57.59) | (55.15-58.57) | (55.12-59.59) | (55.05-60.65) | (54.94-61.75) | (54.79-62.90) | (54.6-64.08)  |
| Tonga                          | 61.22         | 61.28         | 61.35         | 61.41         | 61.48         | 61.54         | 61.61         | 61.67         | 61.74         |
|                                | (60.51-61.92) | (60.58-61.98) | (60.64-62.05) | (60.71-62.11) | (60.77-62.18) | (60.84-62.24) | (60.90-62.31) | (60.97-62.37) | (61.04-62.44) |
| Trinidad and Tobago            | 63.59         | 63.66         | 63.74         | 63.81         | 63.89         | 63.97         | 64.04         | 64.12         | 64.19         |
|                                | (63.35-63.82) | (63.21-64.12) | (63.02-64.46) | (62.80-64.83) | (62.55-65.23) | (62.27-65.66) | (61.97-66.11) | (61.64-66.60) | (61.28-67.1)  |
| Tunisia                        | 66.83         | 67.09         | 67.41         | 67.77         | 68.20         | 68.68         | 69.24         | 69.88         | 70.59         |
|                                | (66.70-66.96) | (66.81-67.38) | (66.93-67.88) | (67.07-68.47) | (67.25-69.14) | (67.47-69.90) | (67.73-70.75) | (68.06-71.70) | (68.44-72.75) |
| Turkey                         | 67.67         | 67.72         | 67.74         | 67.74         | 67.72         | 67.67         | 67.6          | 67.51         | 67.39         |
|                                | (66.75-68.59) | (66.41-69.02) | (66.15-69.34) | (65.90-69.59) | (65.66-69.78) | (65.41-69.93) | (65.16-70.04) | (64.90-70.12) | (64.62-70.16) |
| Turkmenistan                   | 62.37         | 62.69         | 63.00         | 63.31         | 63.63         | 63.94         | 64.25         | 64.57         | 64.88         |
|                                | (62.25-62.49) | (62.42-62.96) | (62.55-63.45) | (62.65-63.98) | (62.73-64.53) | (62.78-65.10) | (62.82-65.69) | (62.83-66.30) | (62.83-66.93) |
| Uganda                         | 54.93         | 55.52         | 56.1          | 56.68         | 57.27         | 57.85         | 58.44         | 59.02         | 59.60         |
|                                | (54.64-55.23) | (54.90-56.13) | (55.10-57.10) | (55.24-58.13) | (55.34-59.20) | (55.39-60.32) | (55.39-61.48) | (55.36-62.68) | (55.29-63.92) |
| Ukraine                        | 63.32         | 63.62         | 63.92         | 64.22         | 64.53         | 64.84         | 65.16         | 65.48         | 65.80         |
|                                | (62.52-64.13) | (62.48-64.75) | (62.52-65.31) | (62.61-65.83) | (62.73-66.33) | (62.87-66.81) | (63.03-67.29) | (63.20-67.75) | (63.39-68.22) |

|                      |                        |                        |                        |                        |                        |                        |                        |                        |                        |
|----------------------|------------------------|------------------------|------------------------|------------------------|------------------------|------------------------|------------------------|------------------------|------------------------|
| United Arab Emirates | 65.21<br>(65.03-65.39) | 65.33<br>(64.93-65.74) | 65.46<br>(64.78-66.13) | 65.58<br>(64.60-66.57) | 65.71<br>(64.37-67.05) | 65.84<br>(64.12-67.56) | 65.96<br>(63.83-68.10) | 66.09<br>(63.51-68.66) | 66.21<br>(63.17-69.26) |
| United Kingdom       | 70.08<br>(70.00-70.17) | 70.12<br>(69.94-70.30) | 70.15<br>(69.86-70.45) | 70.19<br>(69.76-70.62) | 70.23<br>(69.64-70.81) | 70.26<br>(69.51-71.01) | 70.30<br>(69.37-71.22) | 70.33<br>(69.21-71.45) | 70.37<br>(69.05-71.69) |
| United States        | 67.68<br>(67.56-67.80) | 67.66<br>(67.39-67.93) | 67.65<br>(67.20-68.10) | 67.63<br>(66.97-68.29) | 67.62<br>(66.72-68.51) | 67.60<br>(66.45-68.75) | 67.58<br>(66.16-69.01) | 67.57<br>(65.85-69.29) | 67.55<br>(65.52-69.59) |
| Uruguay              | 68.03<br>(67.81-68.25) | 68.12<br>(67.81-68.43) | 68.21<br>(67.83-68.59) | 68.29<br>(67.85-68.73) | 68.37<br>(67.88-68.86) | 68.44<br>(67.91-68.98) | 68.51<br>(67.93-69.09) | 68.58<br>(67.96-69.20) | 68.64<br>(67.98-69.29) |
| US Virgin Islands    | 65.58<br>(65.47-65.70) | 65.62<br>(65.45-65.78) | 65.65<br>(65.45-65.85) | 65.68<br>(65.45-65.91) | 65.71<br>(65.45-65.97) | 65.73<br>(65.45-66.02) | 65.75<br>(65.44-66.06) | 65.77<br>(65.44-66.10) | 65.78<br>(65.43-66.13) |
| Uzbekistan           | 62.05<br>(61.90-62.20) | 62.30<br>(61.96-62.63) | 62.55<br>(61.98-63.11) | 62.79<br>(61.97-63.62) | 63.04<br>(61.93-64.15) | 63.29<br>(61.85-64.72) | 63.53<br>(61.76-65.31) | 63.78<br>(61.63-65.93) | 64.03<br>(61.49-66.57) |
| Vanuatu              | 56.05<br>(55.52-56.58) | 56.19<br>(55.65-56.74) | 56.34<br>(55.78-56.91) | 56.49<br>(55.88-57.10) | 56.64<br>(55.97-57.31) | 56.79<br>(56.04-57.53) | 56.93<br>(56.09-57.78) | 57.08<br>(56.13-58.04) | 57.23<br>(56.15-58.31) |
| Venezuela            | 66.90<br>(65.49-68.31) | 67.00<br>(65.59-68.41) | 67.10<br>(65.68-68.52) | 67.20<br>(65.78-68.63) | 67.30<br>(65.87-68.73) | 67.40<br>(65.97-68.84) | 67.50<br>(66.06-68.95) | 67.61<br>(66.16-69.06) | 67.71<br>(66.25-69.16) |
| Vietnam              | 66.13<br>(66.06-66.20) | 66.35<br>(66.25-66.44) | 66.56<br>(66.45-66.68) | 66.78<br>(66.64-66.92) | 67.00<br>(66.85-67.15) | 67.22<br>(67.05-67.39) | 67.43<br>(67.25-67.62) | 67.65<br>(67.46-67.85) | 67.87<br>(67.66-68.08) |
| Zambia               | 51.96<br>(51.46-52.45) | 52.36<br>(51.25-53.47) | 52.66<br>(50.80-54.52) | 52.85<br>(50.12-55.57) | 52.91<br>(49.22-56.59) | 52.83<br>(48.09-57.57) | 52.60<br>(46.72-58.48) | 52.20<br>(45.11-59.30) | 51.64<br>(43.25-60.03) |
| Zimbabwe             | 52.89<br>(52.15-53.62) | 53.69<br>(52.05-55.33) | 54.50<br>(51.76-57.24) | 55.31<br>(51.29-59.32) | 56.11<br>(50.68-61.55) | 56.92<br>(49.93-63.91) | 57.73<br>(49.06-66.40) | 58.53<br>(48.07-69.00) | 59.34<br>(46.97-71.71) |

---

Table S4 Projected global and regional GAP, 2017-2025 (95% confidence interval)

|                     | 2017                   | 2018                   | 2019                   | 2020                   | 2021                   | 2022                   | 2023                   | 2024                   | 2025                   |
|---------------------|------------------------|------------------------|------------------------|------------------------|------------------------|------------------------|------------------------|------------------------|------------------------|
| Afghanistan         | 8.49<br>(8.30-8.68)    | 8.52<br>(8.26-8.79)    | 8.55<br>(8.23-8.88)    | 8.59<br>(8.21-8.96)    | 8.62<br>(8.20-9.04)    | 8.65<br>(8.19-9.11)    | 8.68<br>(8.19-9.18)    | 8.72<br>(8.19-9.25)    | 8.75<br>(8.19-9.31)    |
| Albania             | 9.93<br>(9.71-10.15)   | 9.98<br>(9.71-10.24)   | 10.02<br>(9.71-10.34)  | 10.07<br>(9.70-10.44)  | 10.12<br>(9.68-10.55)  | 10.16<br>(9.66-10.66)  | 10.21<br>(9.64-10.78)  | 10.25<br>(9.61-10.89)  | 10.30<br>(9.58-11.02)  |
| Algeria             | 11.36<br>(11.30-11.42) | 11.37<br>(11.29-11.45) | 11.37<br>(11.25-11.48) | 11.37<br>(11.21-11.53) | 11.37<br>(11.16-11.58) | 11.37<br>(11.11-11.64) | 11.37<br>(11.05-11.70) | 11.38<br>(10.98-11.77) | 11.38<br>(10.91-11.84) |
| Andorra             | 11.32<br>(11.28-11.37) | 11.32<br>(11.22-11.41) | 11.31<br>(11.16-11.47) | 11.31<br>(11.09-11.53) | 11.30<br>(11.01-11.60) | 11.30<br>(10.92-11.67) | 11.29<br>(10.83-11.76) | 11.29<br>(10.73-11.85) | 11.28<br>(10.63-11.94) |
| Angola              | 8.42<br>(8.35-8.50)    | 8.50<br>(8.37-8.63)    | 8.57<br>(8.38-8.76)    | 8.64<br>(8.39-8.90)    | 8.72<br>(8.38-9.05)    | 8.79<br>(8.38-9.20)    | 8.86<br>(8.36-9.36)    | 8.93<br>(8.35-9.52)    | 9.01<br>(8.32-9.69)    |
| Antigua and Barbuda | 9.84<br>(9.75-9.93)    | 9.85<br>(9.73-9.98)    | 9.87<br>(9.72-10.01)   | 9.88<br>(9.70-10.05)   | 9.88<br>(9.69-10.08)   | 9.89<br>(9.68-10.10)   | 9.90<br>(9.67-10.13)   | 9.90<br>(9.66-10.15)   | 9.91<br>(9.65-10.17)   |
| Argentina           | 9.54<br>(9.51-9.57)    | 9.57<br>(9.54-9.60)    | 9.60<br>(9.56-9.63)    | 9.63<br>(9.59-9.66)    | 9.65<br>(9.62-9.69)    | 9.68<br>(9.65-9.72)    | 9.71<br>(9.68-9.75)    | 9.74<br>(9.70-9.77)    | 9.77<br>(9.73-9.80)    |
| Armenia             | 9.43<br>(9.28-9.59)    | 9.49<br>(9.28-9.70)    | 9.54<br>(9.28-9.81)    | 9.60<br>(9.29-9.91)    | 9.65<br>(9.31-10.00)   | 9.70<br>(9.33-10.09)   | 9.76<br>(9.35-10.18)   | 9.81<br>(9.38-10.26)   | 9.87<br>(9.41-10.35)   |
| Australia           | 10.96<br>(10.91-11.00) | 10.93<br>(10.83-11.02) | 10.90<br>(10.74-11.06) | 10.87<br>(10.64-11.10) | 10.84<br>(10.54-11.15) | 10.82<br>(10.42-11.21) | 10.79<br>(10.30-11.28) | 10.76<br>(10.17-11.35) | 10.73<br>(10.03-11.43) |
| Austria             | 10.63<br>(10.60-10.67) | 10.66<br>(10.61-10.71) | 10.69<br>(10.63-10.75) | 10.72<br>(10.65-10.78) | 10.74<br>(10.67-10.82) | 10.77<br>(10.68-10.85) | 10.79<br>(10.70-10.88) | 10.81<br>(10.72-10.91) | 10.83<br>(10.73-10.93) |
| Azerbaijan          | 8.70<br>(8.58-8.82)    | 8.75<br>(8.55-8.96)    | 8.81<br>(8.52-9.11)    | 8.87<br>(8.47-9.27)    | 8.92<br>(8.41-9.44)    | 8.98<br>(8.34-9.62)    | 9.04<br>(8.27-9.81)    | 9.10<br>(8.19-10.01)   | 9.15<br>(8.09-10.21)   |

|                           |                        |                        |                        |                        |                        |                        |                        |                        |                        |
|---------------------------|------------------------|------------------------|------------------------|------------------------|------------------------|------------------------|------------------------|------------------------|------------------------|
| Bahamas                   | 8.97<br>(8.90-9.04)    | 8.96<br>(8.84-9.09)    | 8.96<br>(8.76-9.15)    | 8.95<br>(8.67-9.23)    | 8.94<br>(8.57-9.31)    | 8.93<br>(8.47-9.40)    | 8.92<br>(8.36-9.49)    | 8.92<br>(8.24-9.59)    | 8.91<br>(8.11-9.70)    |
| Bahrain                   | 11.43<br>(11.31-11.54) | 11.44<br>(11.27-11.61) | 11.45<br>(11.24-11.65) | 11.45<br>(11.22-11.69) | 11.45<br>(11.19-11.72) | 11.45<br>(11.16-11.74) | 11.45<br>(11.13-11.76) | 11.44<br>(11.10-11.77) | 11.42<br>(11.07-11.77) |
| Bangladesh                | 9.90<br>(9.81-9.99)    | 9.93<br>(9.82-10.03)   | 9.95<br>(9.82-10.08)   | 9.97<br>(9.81-10.14)   | 9.99<br>(9.79-10.20)   | 10.01<br>(9.76-10.26)  | 10.03<br>(9.73-10.33)  | 10.05<br>(9.69-10.4)   | 10.06<br>(9.66-10.47)  |
| Barbados                  | 9.67<br>(9.61-9.74)    | 9.64<br>(9.51-9.77)    | 9.61<br>(9.41-9.81)    | 9.58<br>(9.30-9.86)    | 9.55<br>(9.18-9.92)    | 9.52<br>(9.05-9.98)    | 9.49<br>(8.92-10.06)   | 9.46<br>(8.77-10.14)   | 9.43<br>(8.62-10.23)   |
| Belarus                   | 9.49<br>(9.31-9.67)    | 9.47<br>(9.12-9.82)    | 9.45<br>(8.89-10.00)   | 9.43<br>(8.63-10.22)   | 9.40<br>(8.35-10.46)   | 9.38<br>(8.05-10.72)   | 9.36<br>(7.72-11.00)   | 9.34<br>(7.37-11.30)   | 9.32<br>(7.01-11.63)   |
| Belgium                   | 10.79<br>(10.73-10.86) | 10.79<br>(10.64-10.93) | 10.78<br>(10.54-11.02) | 10.77<br>(10.42-11.12) | 10.76<br>(10.29-11.23) | 10.75<br>(10.16-11.35) | 10.75<br>(10.01-11.49) | 10.74<br>(9.85-11.63)  | 10.73<br>(9.68-11.79)  |
| Benin                     | 8.52<br>(8.44-8.59)    | 8.56<br>(8.46-8.66)    | 8.60<br>(8.46-8.75)    | 8.65<br>(8.46-8.83)    | 8.69<br>(8.46-8.92)    | 8.74<br>(8.46-9.01)    | 8.78<br>(8.45-9.11)    | 8.82<br>(8.44-9.21)    | 8.87<br>(8.43-9.31)    |
| Bhutan                    | 10.77<br>(10.63-10.91) | 10.80<br>(10.66-10.94) | 10.83<br>(10.69-10.98) | 10.87<br>(10.71-11.02) | 10.90<br>(10.73-11.06) | 10.92<br>(10.75-11.10) | 10.95<br>(10.76-11.14) | 10.98<br>(10.77-11.19) | 11.01<br>(10.78-11.24) |
| Bolivia                   | 9.26<br>(9.21-9.31)    | 9.25<br>(9.17-9.33)    | 9.24<br>(9.12-9.37)    | 9.23<br>(9.06-9.41)    | 9.23<br>(8.99-9.46)    | 9.22<br>(8.92-9.52)    | 9.21<br>(8.84-9.58)    | 9.20<br>(8.75-9.65)    | 9.19<br>(8.66-9.72)    |
| Bosnia and<br>Herzegovina | 10.34<br>(10.03-10.65) | 10.42<br>(9.98-10.87)  | 10.51<br>(9.97-11.05)  | 10.60<br>(9.97-11.22)  | 10.68<br>(9.98-11.38)  | 10.77<br>(10.00-11.53) | 10.85<br>(10.02-11.68) | 10.94<br>(10.05-11.82) | 11.02<br>(10.08-11.96) |
| Botswana                  | 8.81<br>(8.58-9.04)    | 8.99<br>(8.47-9.51)    | 9.16<br>(8.30-10.03)   | 9.34<br>(8.07-10.61)   | 9.52<br>(7.80-11.24)   | 9.70<br>(7.48-11.91)   | 9.87<br>(7.12-12.62)   | 10.05<br>(6.73-13.37)  | 10.23<br>(6.31-14.15)  |

(Continue to next page)

---

|        | 2017                | 2018                | 2019                | 2020                | 2021                | 2022                 | 2023                 | 2024                 | 2025                 |
|--------|---------------------|---------------------|---------------------|---------------------|---------------------|----------------------|----------------------|----------------------|----------------------|
| Brazil | 9.74<br>(9.68-9.80) | 9.71<br>(9.60-9.83) | 9.69<br>(9.51-9.87) | 9.66<br>(9.41-9.92) | 9.64<br>(9.29-9.98) | 9.61<br>(9.18-10.04) | 9.58<br>(9.05-10.12) | 9.56<br>(8.92-10.20) | 9.53<br>(8.78-10.28) |

(Continued from previous page)

|              |               |               |               |               |               |               |               |               |               |
|--------------|---------------|---------------|---------------|---------------|---------------|---------------|---------------|---------------|---------------|
| Bulgaria     | 9.39          | 9.35          | 9.31          | 9.27          | 9.23          | 9.19          | 9.15          | 9.11          | 9.07          |
|              | (9.29-9.49)   | (9.14-9.56)   | (8.97-9.65)   | (8.79-9.75)   | (8.58-9.88)   | (8.37-10.01)  | (8.13-10.17)  | (7.89-10.33)  | (7.63-10.51)  |
| Burkina Faso | 7.91          | 7.95          | 8.00          | 8.04          | 8.09          | 8.14          | 8.19          | 8.25          | 8.30          |
|              | (7.80-8.02)   | (7.79-8.11)   | (7.81-8.19)   | (7.82-8.26)   | (7.85-8.34)   | (7.87-8.41)   | (7.90-8.48)   | (7.94-8.56)   | (7.97-8.63)   |
| Burundi      | 6.86          | 6.87          | 6.88          | 6.90          | 6.91          | 6.92          | 6.93          | 6.94          | 6.96          |
|              | (6.76-6.96)   | (6.72-7.02)   | (6.65-7.11)   | (6.57-7.22)   | (6.47-7.35)   | (6.36-7.48)   | (6.24-7.62)   | (6.11-7.78)   | (5.97-7.94)   |
| Cambodia     | 8.63          | 8.62          | 8.62          | 8.61          | 8.61          | 8.60          | 8.59          | 8.59          | 8.58          |
|              | (8.56-8.70)   | (8.50-8.74)   | (8.44-8.80)   | (8.36-8.86)   | (8.28-8.93)   | (8.19-9.01)   | (8.09-9.09)   | (7.99-9.18)   | (7.89-9.27)   |
| Cameroon     | 7.68          | 7.71          | 7.75          | 7.78          | 7.81          | 7.84          | 7.88          | 7.91          | 7.94          |
|              | (7.63-7.74)   | (7.59-7.84)   | (7.54-7.95)   | (7.48-8.08)   | (7.41-8.22)   | (7.33-8.36)   | (7.23-8.52)   | (7.13-8.69)   | (7.03-8.86)   |
| Canada       | 10.67         | 10.69         | 10.71         | 10.73         | 10.74         | 10.76         | 10.78         | 10.80         | 10.81         |
|              | (10.62-10.72) | (10.59-10.79) | (10.55-10.87) | (10.50-10.95) | (10.44-11.05) | (10.37-11.15) | (10.30-11.26) | (10.22-11.37) | (10.13-11.50) |
| Cape Verde   | 9.40          | 9.39          | 9.37          | 9.36          | 9.34          | 9.31          | 9.29          | 9.26          | 9.22          |
|              | (9.32-9.48)   | (9.27-9.51)   | (9.23-9.52)   | (9.19-9.53)   | (9.15-9.53)   | (9.11-9.52)   | (9.06-9.51)   | (9.02-9.50)   | (8.97-9.48)   |
| Chad         | 8.19          | 8.27          | 8.36          | 8.44          | 8.53          | 8.61          | 8.70          | 8.78          | 8.87          |
|              | (8.10-8.28)   | (8.15-8.40)   | (8.17-8.54)   | (8.19-8.70)   | (8.19-8.87)   | (8.18-9.05)   | (8.16-9.23)   | (8.14-9.43)   | (8.10-9.63)   |
| Chile        | 10.37         | 10.32         | 10.27         | 10.21         | 10.16         | 10.11         | 10.06         | 10.01         | 9.96          |
|              | (10.27-10.47) | (10.12-10.51) | (9.95-10.58)  | (9.77-10.66)  | (9.58-10.75)  | (9.37-10.86)  | (9.14-10.98)  | (8.91-11.11)  | (8.67-11.25)  |
| Colombia     | 9.26          | 9.31          | 9.35          | 9.40          | 9.45          | 9.50          | 9.54          | 9.59          | 9.64          |
|              | (9.17-9.35)   | (9.21-9.40)   | (9.26-9.45)   | (9.31-9.50)   | (9.35-9.54)   | (9.40-9.59)   | (9.45-9.64)   | (9.49-9.69)   | (9.54-9.73)   |
| China        | 8.55          | 8.58          | 8.62          | 8.65          | 8.69          | 8.72          | 8.76          | 8.79          | 8.82          |
|              | (8.46-8.64)   | (8.44-8.72)   | (8.41-8.82)   | (8.38-8.93)   | (8.34-9.04)   | (8.29-9.15)   | (8.24-9.27)   | (8.18-9.40)   | (8.11-9.53)   |
| Comoros      | 8.30          | 8.34          | 8.38          | 8.42          | 8.46          | 8.50          | 8.53          | 8.57          | 8.61          |
|              | (8.16-8.45)   | (8.17-8.52)   | (8.19-8.57)   | (8.21-8.63)   | (8.23-8.69)   | (8.25-8.74)   | (8.27-8.80)   | (8.30-8.85)   | (8.32-8.90)   |
| Congo        | 8.59          | 8.69          | 8.78          | 8.87          | 8.97          | 9.06          | 9.16          | 9.25          | 9.34          |
|              | (8.04-9.14)   | (8.13-9.24)   | (8.22-9.34)   | (8.31-9.43)   | (8.41-9.53)   | (8.50-9.63)   | (8.59-9.72)   | (8.68-9.82)   | (8.77-9.91)   |
| Costa Rica   | 9.81          | 9.81          | 9.80          | 9.79          | 9.78          | 9.77          | 9.76          | 9.76          | 9.75          |

|                |               |               |               |               |               |               |               |               |               |
|----------------|---------------|---------------|---------------|---------------|---------------|---------------|---------------|---------------|---------------|
|                | (9.76-9.87)   | (9.71-9.90)   | (9.66-9.94)   | (9.59-9.99)   | (9.52-10.04)  | (9.45-10.10)  | (9.36-10.16)  | (9.28-10.23)  | (9.19-10.31)  |
| Coted Ivoire   | 7.81          | 7.91          | 8.00          | 8.10          | 8.20          | 8.30          | 8.40          | 8.49          | 8.59          |
|                | (7.69-7.93)   | (7.71-8.11)   | (7.71-8.30)   | (7.70-8.51)   | (7.68-8.72)   | (7.65-8.95)   | (7.61-9.18)   | (7.56-9.43)   | (7.50-9.68)   |
| Croatia        | 9.97          | 9.99          | 10.02         | 10.04         | 10.05         | 10.07         | 10.08         | 10.09         | 10.10         |
|                | (9.90-10.04)  | (9.89-10.10)  | (9.89-10.14)  | (9.89-10.18)  | (9.89-10.22)  | (9.89-10.25)  | (9.89-10.28)  | (9.89-10.30)  | (9.89-10.32)  |
| Cuba           | 9.76          | 9.78          | 9.81          | 9.84          | 9.87          | 9.90          | 9.93          | 9.96          | 9.99          |
|                | (9.72-9.79)   | (9.73-9.84)   | (9.75-9.88)   | (9.77-9.92)   | (9.79-9.96)   | (9.81-9.99)   | (9.83-10.03)  | (9.85-10.07)  | (9.87-10.10)  |
| Cyprus         | 10.25         | 10.22         | 10.19         | 10.16         | 10.13         | 10.10         | 10.07         | 10.04         | 10.01         |
|                | (10.16-10.34) | (10.05-10.39) | (9.93-10.45)  | (9.79-10.53)  | (9.64-10.62)  | (9.48-10.72)  | (9.31-10.83)  | (9.14-10.94)  | (8.95-11.07)  |
| Czech Republic | 11.07         | 11.14         | 11.21         | 11.27         | 11.34         | 11.41         | 11.48         | 11.54         | 11.61         |
|                | (10.97-11.16) | (11.00-11.27) | (11.04-11.37) | (11.08-11.46) | (11.13-11.55) | (11.18-11.64) | (11.22-11.73) | (11.28-11.81) | (11.33-11.90) |
| Denmark        | 10.97         | 10.99         | 11.02         | 11.04         | 11.06         | 11.09         | 11.11         | 11.13         | 11.16         |
|                | (10.92-11.02) | (10.90-11.08) | (10.88-11.15) | (10.85-11.23) | (10.81-11.32) | (10.77-11.41) | (10.72-11.50) | (10.67-11.60) | (10.61-11.70) |
| Djibouti       | 8.17          | 8.24          | 8.31          | 8.38          | 8.45          | 8.53          | 8.60          | 8.67          | 8.74          |
|                | (8.10-8.23)   | (8.14-8.34)   | (8.18-8.45)   | (8.21-8.56)   | (8.24-8.67)   | (8.26-8.79)   | (8.28-8.91)   | (8.30-9.03)   | (8.32-9.16)   |

(Continue to next page)

|                                | 2017          | 2018          | 2019          | 2020          | 2021          | 2022          | 2023          | 2024          | 2025          |
|--------------------------------|---------------|---------------|---------------|---------------|---------------|---------------|---------------|---------------|---------------|
| (Continued from previous page) |               |               |               |               |               |               |               |               |               |
| Dominican Republic             | 11.71         | 11.91         | 12.12         | 12.33         | 12.53         | 12.74         | 12.94         | 13.15         | 13.36         |
|                                | (10.26-13.16) | (10.31-13.51) | (10.35-13.89) | (10.37-14.29) | (10.37-14.70) | (10.35-15.12) | (10.33-15.56) | (10.29-16.01) | (10.24-16.47) |
| Timor-Leste                    | 9.92          | 10.02         | 10.12         | 10.23         | 10.33         | 10.43         | 10.53         | 10.63         | 10.73         |
|                                | (9.21-10.63)  | (9.31-10.74)  | (9.41-10.84)  | (9.50-10.95)  | (9.60-11.05)  | (9.70-11.15)  | (9.80-11.26)  | (9.90-11.36)  | (9.99-11.47)  |
| Ecuador                        | 9.75          | 9.78          | 9.82          | 9.86          | 9.89          | 9.93          | 9.97          | 10.00         | 10.04         |
|                                | (9.68-9.81)   | (9.72-9.85)   | (9.75-9.88)   | (9.79-9.92)   | (9.83-9.96)   | (9.86-10.00)  | (9.90-10.03)  | (9.94-10.07)  | (9.97-10.11)  |
| El Salvador                    | 9.01          | 9.01          | 9.01          | 9.01          | 9.01          | 9.01          | 9.01          | 9.01          | 9.01          |
|                                | (8.93-9.09)   | (8.92-9.10)   | (8.89-9.13)   | (8.86-9.16)   | (8.82-9.20)   | (8.77-9.25)   | (8.72-9.30)   | (8.66-9.35)   | (8.60-9.41)   |

|                   |                        |                        |                        |                        |                        |                        |                        |                        |                        |
|-------------------|------------------------|------------------------|------------------------|------------------------|------------------------|------------------------|------------------------|------------------------|------------------------|
| Equatorial Guinea | 8.82<br>(8.64-9.00)    | 8.82<br>(8.46-9.18)    | 8.82<br>(8.26-9.39)    | 8.83<br>(8.02-9.63)    | 8.83<br>(7.77-9.89)    | 8.83<br>(7.48-10.18)   | 8.83<br>(7.18-10.49)   | 8.84<br>(6.85-10.82)   | 8.84<br>(6.51-11.17)   |
| Eritrea           | 7.57<br>(6.95-8.19)    | 7.61<br>(6.99-8.23)    | 7.65<br>(7.03-8.28)    | 7.69<br>(7.07-8.32)    | 7.73<br>(7.11-8.36)    | 7.77<br>(7.15-8.40)    | 7.82<br>(7.19-8.44)    | 7.86<br>(7.23-8.48)    | 7.90<br>(7.27-8.52)    |
| Estonia           | 10.46<br>(10.19-10.72) | 10.50<br>(10.12-10.87) | 10.54<br>(10.08-10.99) | 10.57<br>(10.04-11.10) | 10.60<br>(10.01-11.19) | 10.62<br>(9.98-11.27)  | 10.65<br>(9.95-11.35)  | 10.66<br>(9.91-11.41)  | 10.68<br>(9.88-11.47)  |
| Ethiopia          | 8.17<br>(8.11-8.23)    | 8.17<br>(8.09-8.25)    | 8.17<br>(8.07-8.27)    | 8.17<br>(8.06-8.29)    | 8.17<br>(8.04-8.30)    | 8.17<br>(8.03-8.31)    | 8.17<br>(8.02-8.32)    | 8.17<br>(8.01-8.33)    | 8.17<br>(8.00-8.34)    |
| Fiji              | 8.17<br>(8.11-8.23)    | 8.17<br>(8.09-8.25)    | 8.17<br>(8.07-8.27)    | 8.17<br>(8.06-8.29)    | 8.17<br>(8.04-8.30)    | 8.17<br>(8.03-8.31)    | 8.17<br>(8.02-8.32)    | 8.17<br>(8.01-8.33)    | 8.17<br>(8.00-8.34)    |
| Finland           | 11.25<br>(11.19-11.30) | 11.28<br>(11.21-11.36) | 11.32<br>(11.23-11.41) | 11.36<br>(11.25-11.46) | 11.39<br>(11.28-11.51) | 11.43<br>(11.30-11.55) | 11.46<br>(11.32-11.60) | 11.49<br>(11.35-11.64) | 11.53<br>(11.37-11.68) |
| France            | 10.65<br>(10.59-10.70) | 10.66<br>(10.56-10.75) | 10.67<br>(10.52-10.81) | 10.68<br>(10.48-10.88) | 10.69<br>(10.43-10.95) | 10.70<br>(10.37-11.02) | 10.71<br>(10.31-11.11) | 10.72<br>(10.25-11.19) | 10.73<br>(10.18-11.28) |
| Gabon             | 9.05<br>(8.91-9.19)    | 9.15<br>(8.94-9.35)    | 9.25<br>(8.96-9.53)    | 9.34<br>(8.97-9.72)    | 9.44<br>(8.97-9.91)    | 9.54<br>(8.96-10.12)   | 9.64<br>(8.95-10.32)   | 9.74<br>(8.93-10.54)   | 9.83<br>(8.91-10.76)   |
| Gambia            | 9.10<br>(9.04-9.17)    | 9.14<br>(9.05-9.23)    | 9.18<br>(9.07-9.29)    | 9.22<br>(9.09-9.35)    | 9.26<br>(9.12-9.41)    | 9.30<br>(9.14-9.46)    | 9.35<br>(9.18-9.52)    | 9.39<br>(9.21-9.58)    | 9.44<br>(9.24-9.63)    |
| Germany           | 10.72<br>(10.70-10.75) | 10.74<br>(10.71-10.78) | 10.76<br>(10.72-10.81) | 10.78<br>(10.73-10.83) | 10.80<br>(10.74-10.86) | 10.82<br>(10.75-10.88) | 10.83<br>(10.76-10.90) | 10.84<br>(10.77-10.92) | 10.86<br>(10.78-10.93) |
| Ghana             | 8.13<br>(8.05-8.22)    | 8.18<br>(8.04-8.33)    | 8.23<br>(8.01-8.46)    | 8.28<br>(7.97-8.59)    | 8.33<br>(7.93-8.73)    | 8.38<br>(7.88-8.88)    | 8.43<br>(7.82-9.04)    | 8.48<br>(7.75-9.20)    | 8.52<br>(7.68-9.37)    |
| Greece            | 10.33<br>(10.29-10.37) | 10.32<br>(10.23-10.40) | 10.30<br>(10.17-10.43) | 10.29<br>(10.11-10.46) | 10.27<br>(10.04-10.50) | 10.26<br>(9.97-10.55)  | 10.24<br>(9.89-10.60)  | 10.23<br>(9.80-10.66)  | 10.21<br>(9.71-10.71)  |
| Guatemala         | 8.94<br>(8.87-9.01)    | 8.94<br>(8.85-9.02)    | 8.94<br>(8.83-9.05)    | 8.94<br>(8.80-9.08)    | 8.94<br>(8.76-9.11)    | 8.93<br>(8.71-9.15)    | 8.93<br>(8.67-9.20)    | 8.93<br>(8.61-9.25)    | 8.93<br>(8.56-9.31)    |
| Guinea            | 7.79                   | 7.84                   | 7.88                   | 7.93                   | 7.98                   | 8.03                   | 8.08                   | 8.13                   | 8.18                   |

|          |               |               |               |               |               |               |               |               |               |
|----------|---------------|---------------|---------------|---------------|---------------|---------------|---------------|---------------|---------------|
|          | (7.69-7.88)   | (7.71-7.96)   | (7.73-8.04)   | (7.74-8.13)   | (7.75-8.21)   | (7.76-8.30)   | (7.77-8.40)   | (7.77-8.49)   | (7.77-8.59)   |
| Guyana   | 8.71          | 8.85          | 8.99          | 9.13          | 9.27          | 9.41          | 9.55          | 9.69          | 9.83          |
|          | (8.62-8.79)   | (8.66-9.04)   | (8.67-9.30)   | (8.67-9.59)   | (8.64-9.89)   | (8.60-10.21)  | (8.55-10.55)  | (8.48-10.89)  | (8.40-11.25)  |
| Honduras | 8.48          | 8.51          | 8.55          | 8.58          | 8.62          | 8.66          | 8.69          | 8.73          | 8.76          |
|          | (8.07-8.89)   | (8.10-8.92)   | (8.14-8.96)   | (8.17-9.00)   | (8.21-9.03)   | (8.24-9.07)   | (8.27-9.11)   | (8.31-9.14)   | (8.34-9.18)   |
| Hungary  | 9.97          | 10.01         | 10.06         | 10.10         | 10.15         | 10.19         | 10.23         | 10.28         | 10.32         |
|          | (9.85-10.08)  | (9.85-10.18)  | (9.86-10.26)  | (9.87-10.33)  | (9.89-10.40)  | (9.91-10.47)  | (9.93-10.54)  | (9.95-10.61)  | (9.98-10.67)  |
| Iceland  | 10.79         | 10.79         | 10.78         | 10.78         | 10.78         | 10.78         | 10.78         | 10.77         | 10.77         |
|          | (10.76-10.82) | (10.73-10.84) | (10.69-10.88) | (10.65-10.92) | (10.60-10.96) | (10.54-11.01) | (10.49-11.07) | (10.42-11.13) | (10.36-11.19) |

(Continue to next page)

|                                | 2017          | 2018          | 2019          | 2020          | 2021          | 2022          | 2023          | 2024          | 2025          |
|--------------------------------|---------------|---------------|---------------|---------------|---------------|---------------|---------------|---------------|---------------|
| (Continued from previous page) |               |               |               |               |               |               |               |               |               |
| India                          | 9.73          | 9.80          | 9.87          | 9.95          | 10.02         | 10.10         | 10.18         | 10.26         | 10.34         |
|                                | (9.69-9.77)   | (9.74-9.86)   | (9.80-9.95)   | (9.86-10.03)  | (9.93-10.12)  | (9.99-10.21)  | (10.06-10.29) | (10.13-10.38) | (10.21-10.47) |
| Indonesia                      | 8.78          | 8.85          | 8.92          | 8.99          | 9.06          | 9.13          | 9.21          | 9.28          | 9.36          |
|                                | (8.59-8.97)   | (8.57-9.12)   | (8.58-9.25)   | (8.60-9.38)   | (8.62-9.49)   | (8.65-9.61)   | (8.69-9.72)   | (8.73-9.84)   | (8.78-9.95)   |
| Iraq                           | 10.17         | 10.17         | 10.17         | 10.17         | 10.17         | 10.17         | 10.17         | 10.17         | 10.17         |
|                                | (9.87-10.47)  | (9.74-10.59)  | (9.65-10.69)  | (9.57-10.77)  | (9.49-10.84)  | (9.43-10.90)  | (9.37-10.96)  | (9.32-11.02)  | (9.26-11.07)  |
| Ireland                        | 10.70         | 10.70         | 10.70         | 10.70         | 10.70         | 10.71         | 10.71         | 10.71         | 10.71         |
|                                | (10.63-10.76) | (10.57-10.83) | (10.50-10.90) | (10.42-10.99) | (10.33-11.08) | (10.23-11.18) | (10.13-11.29) | (10.01-11.40) | (9.89-11.53)  |
| Iran                           | 11.23         | 11.29         | 11.34         | 11.40         | 11.46         | 11.51         | 11.57         | 11.62         | 11.68         |
|                                | (10.99-11.47) | (10.96-11.62) | (10.91-11.77) | (10.86-11.94) | (10.80-12.11) | (10.73-12.29) | (10.65-12.48) | (10.57-12.68) | (10.48-12.88) |
| Israel                         | 10.72         | 10.73         | 10.75         | 10.76         | 10.76         | 10.77         | 10.77         | 10.77         | 10.77         |
|                                | (10.61-10.82) | (10.58-10.89) | (10.56-10.93) | (10.54-10.97) | (10.52-11.01) | (10.50-11.04) | (10.49-11.06) | (10.47-11.08) | (10.45-11.10) |
| Italy                          | 10.61         | 10.63         | 10.64         | 10.66         | 10.67         | 10.69         | 10.70         | 10.71         | 10.72         |
|                                | (10.56-10.66) | (10.56-10.69) | (10.56-10.73) | (10.56-10.76) | (10.56-10.78) | (10.57-10.81) | (10.57-10.83) | (10.57-10.85) | (10.58-10.87) |

|            |               |               |               |               |               |               |               |               |               |
|------------|---------------|---------------|---------------|---------------|---------------|---------------|---------------|---------------|---------------|
| Jamaica    | 9.57          | 9.58          | 9.60          | 9.61          | 9.63          | 9.64          | 9.66          | 9.67          | 9.69          |
|            | (9.50-9.64)   | (9.48-9.68)   | (9.48-9.71)   | (9.47-9.75)   | (9.47-9.78)   | (9.47-9.81)   | (9.48-9.84)   | (9.48-9.87)   | (9.48-9.90)   |
| Japan      | 10.84         | 10.89         | 10.94         | 10.99         | 11.05         | 11.10         | 11.15         | 11.20         | 11.25         |
|            | (10.79-10.89) | (10.84-10.95) | (10.88-11.00) | (10.93-11.06) | (10.98-11.11) | (11.02-11.17) | (11.07-11.22) | (11.12-11.28) | (11.17-11.33) |
| Jordan     | 11.04         | 10.89         | 10.74         | 10.60         | 10.45         | 10.30         | 10.15         | 10.00         | 9.85          |
|            | (10.93-11.16) | (10.64-11.15) | (10.31-11.18) | (9.97-11.23)  | (9.59-11.30)  | (9.20-11.40)  | (8.79-11.51)  | (8.36-11.65)  | (7.91-11.80)  |
| Kazakhstan | 9.03          | 8.97          | 8.91          | 8.86          | 8.80          | 8.74          | 8.69          | 8.63          | 8.57          |
|            | (8.92-9.14)   | (8.72-9.22)   | (8.50-9.33)   | (8.25-9.46)   | (7.98-9.62)   | (7.69-9.80)   | (7.38-9.99)   | (7.05-10.21)  | (6.70-10.44)  |
| Kenya      | 8.35          | 8.44          | 8.54          | 8.63          | 8.73          | 8.83          | 8.92          | 9.02          | 9.11          |
|            | (8.27-8.42)   | (8.28-8.61)   | (8.26-8.82)   | (8.23-9.04)   | (8.18-9.28)   | (8.12-9.53)   | (8.05-9.80)   | (7.96-10.07)  | (7.86-10.36)  |
| Kiribati   | 7.81          | 7.85          | 7.89          | 7.94          | 7.98          | 8.02          | 8.07          | 8.11          | 8.15          |
|            | (7.79-7.83)   | (7.80-7.90)   | (7.81-7.98)   | (7.82-8.06)   | (7.82-8.14)   | (7.81-8.23)   | (7.81-8.33)   | (7.79-8.42)   | (7.78-8.52)   |
| Kuwait     | 11.38         | 11.30         | 11.22         | 11.14         | 11.06         | 10.98         | 10.90         | 10.82         | 10.74         |
|            | (11.27-11.49) | (11.06-11.54) | (10.81-11.63) | (10.54-11.74) | (10.25-11.87) | (9.94-12.02)  | (9.61-12.19)  | (9.26-12.38)  | (8.90-12.59)  |
| Kyrgyzstan | 8.77          | 8.76          | 8.76          | 8.75          | 8.74          | 8.73          | 8.72          | 8.71          | 8.70          |
|            | (8.68-8.86)   | (8.57-8.96)   | (8.42-9.09)   | (8.26-9.23)   | (8.08-9.40)   | (7.88-9.58)   | (7.67-9.77)   | (7.44-9.98)   | (7.20-10.21)  |
| Laos       | 8.24          | 8.32          | 8.39          | 8.47          | 8.54          | 8.62          | 8.69          | 8.76          | 8.84          |
|            | (8.19-8.30)   | (8.24-8.39)   | (8.29-8.49)   | (8.35-8.58)   | (8.42-8.66)   | (8.48-8.75)   | (8.54-8.84)   | (8.61-8.92)   | (8.67-9.01)   |
| Lebanon    | 11.84         | 11.90         | 11.95         | 12.01         | 12.06         | 12.11         | 12.17         | 12.22         | 12.28         |
|            | (11.60-12.09) | (11.55-12.24) | (11.53-12.37) | (11.52-12.49) | (11.51-12.60) | (11.52-12.71) | (11.52-12.81) | (11.53-12.91) | (11.55-13.01) |
| Lesotho    | 6.66          | 6.83          | 7.00          | 7.17          | 7.34          | 7.51          | 7.69          | 7.86          | 8.03          |
|            | (6.49-6.83)   | (6.45-7.21)   | (6.37-7.63)   | (6.25-8.10)   | (6.09-8.60)   | (5.90-9.13)   | (5.68-9.69)   | (5.44-10.27)  | (5.17-10.88)  |
| Liberia    | 9.21          | 9.28          | 9.35          | 9.41          | 9.48          | 9.54          | 9.61          | 9.68          | 9.74          |
|            | (8.73-9.69)   | (8.79-9.76)   | (8.86-9.83)   | (8.92-9.90)   | (8.99-9.97)   | (9.05-10.04)  | (9.12-10.11)  | (9.18-10.18)  | (9.24-10.24)  |
| Lithuania  | 9.93          | 9.89          | 9.84          | 9.79          | 9.73          | 9.66          | 9.58          | 9.49          | 9.40          |
|            | (9.67-10.19)  | (9.53-10.25)  | (9.40-10.29)  | (9.27-10.30)  | (9.15-10.30)  | (9.03-10.28)  | (8.90-10.26)  | (8.76-10.22)  | (8.62-10.17)  |
| Luxembourg | 11.16         | 11.16         | 11.17         | 11.17         | 11.17         | 11.17         | 11.18         | 11.18         | 11.18         |

(11.09-11.23) (11.03-11.30) (10.96-11.38) (10.87-11.46) (10.78-11.56) (10.68-11.66) (10.58-11.78) (10.46-11.90) (10.34-12.02)

|           |                     |                     |                     |                     |                     |                     |                     |                     |                     |
|-----------|---------------------|---------------------|---------------------|---------------------|---------------------|---------------------|---------------------|---------------------|---------------------|
| Macedonia | 9.28<br>(9.21-9.35) | 9.33<br>(9.23-9.43) | 9.38<br>(9.26-9.51) | 9.44<br>(9.29-9.58) | 9.49<br>(9.33-9.65) | 9.55<br>(9.37-9.72) | 9.60<br>(9.41-9.79) | 9.66<br>(9.46-9.86) | 9.72<br>(9.50-9.93) |
|-----------|---------------------|---------------------|---------------------|---------------------|---------------------|---------------------|---------------------|---------------------|---------------------|

(Continue to next page)

---

|  | 2017 | 2018 | 2019 | 2020 | 2021 | 2022 | 2023 | 2024 | 2025 |
|--|------|------|------|------|------|------|------|------|------|
|--|------|------|------|------|------|------|------|------|------|

---

(Continued from previous page)

|        |                     |                     |                     |                     |                     |                     |                     |                     |                     |
|--------|---------------------|---------------------|---------------------|---------------------|---------------------|---------------------|---------------------|---------------------|---------------------|
| Malawi | 7.57<br>(7.47-7.67) | 7.67<br>(7.47-7.88) | 7.78<br>(7.44-8.12) | 7.88<br>(7.39-8.37) | 7.99<br>(7.33-8.65) | 8.09<br>(7.25-8.93) | 8.20<br>(7.16-9.24) | 8.30<br>(7.05-9.55) | 8.41<br>(6.94-9.88) |
|--------|---------------------|---------------------|---------------------|---------------------|---------------------|---------------------|---------------------|---------------------|---------------------|

|          |                     |                     |                     |                     |                     |                     |                     |                     |                     |
|----------|---------------------|---------------------|---------------------|---------------------|---------------------|---------------------|---------------------|---------------------|---------------------|
| Malaysia | 9.18<br>(9.14-9.21) | 9.21<br>(9.16-9.27) | 9.25<br>(9.17-9.33) | 9.29<br>(9.18-9.40) | 9.33<br>(9.19-9.47) | 9.36<br>(9.19-9.54) | 9.40<br>(9.19-9.61) | 9.44<br>(9.19-9.69) | 9.48<br>(9.19-9.77) |
|----------|---------------------|---------------------|---------------------|---------------------|---------------------|---------------------|---------------------|---------------------|---------------------|

|          |                        |                        |                        |                       |                        |                       |                        |                        |                        |
|----------|------------------------|------------------------|------------------------|-----------------------|------------------------|-----------------------|------------------------|------------------------|------------------------|
| Maldives | 10.36<br>(10.06-10.65) | 10.43<br>(10.11-10.76) | 10.51<br>(10.15-10.86) | 10.58<br>(10.2-10.97) | 10.66<br>(10.25-11.07) | 10.74<br>(10.3-11.17) | 10.81<br>(10.35-11.27) | 10.89<br>(10.41-11.37) | 10.96<br>(10.46-11.47) |
|----------|------------------------|------------------------|------------------------|-----------------------|------------------------|-----------------------|------------------------|------------------------|------------------------|

|      |                     |                     |                     |                     |                     |                     |                     |                     |                     |
|------|---------------------|---------------------|---------------------|---------------------|---------------------|---------------------|---------------------|---------------------|---------------------|
| Mali | 8.18<br>(7.96-8.40) | 8.21<br>(7.90-8.51) | 8.23<br>(7.85-8.61) | 8.25<br>(7.82-8.69) | 8.27<br>(7.78-8.76) | 8.29<br>(7.76-8.82) | 8.31<br>(7.73-8.88) | 8.32<br>(7.70-8.94) | 8.33<br>(7.68-8.99) |
|------|---------------------|---------------------|---------------------|---------------------|---------------------|---------------------|---------------------|---------------------|---------------------|

|       |                        |                        |                        |                        |                        |                        |                       |                       |                       |
|-------|------------------------|------------------------|------------------------|------------------------|------------------------|------------------------|-----------------------|-----------------------|-----------------------|
| Malta | 10.51<br>(10.46-10.56) | 10.52<br>(10.41-10.62) | 10.52<br>(10.34-10.71) | 10.53<br>(10.27-10.80) | 10.54<br>(10.18-10.90) | 10.55<br>(10.09-11.01) | 10.55<br>(9.98-11.13) | 10.56<br>(9.87-11.25) | 10.57<br>(9.75-11.39) |
|-------|------------------------|------------------------|------------------------|------------------------|------------------------|------------------------|-----------------------|-----------------------|-----------------------|

|            |                     |                     |                     |                     |                     |                     |                     |                     |                     |
|------------|---------------------|---------------------|---------------------|---------------------|---------------------|---------------------|---------------------|---------------------|---------------------|
| Mauritania | 9.20<br>(9.16-9.25) | 9.23<br>(9.16-9.29) | 9.25<br>(9.17-9.32) | 9.27<br>(9.18-9.36) | 9.28<br>(9.18-9.38) | 9.30<br>(9.19-9.41) | 9.31<br>(9.19-9.43) | 9.32<br>(9.19-9.44) | 9.32<br>(9.19-9.46) |
|------------|---------------------|---------------------|---------------------|---------------------|---------------------|---------------------|---------------------|---------------------|---------------------|

|        |                     |                     |                     |                     |                     |                     |                     |                     |                     |
|--------|---------------------|---------------------|---------------------|---------------------|---------------------|---------------------|---------------------|---------------------|---------------------|
| Mexico | 9.33<br>(9.24-9.43) | 9.35<br>(9.22-9.48) | 9.37<br>(9.21-9.53) | 9.39<br>(9.21-9.57) | 9.41<br>(9.20-9.61) | 9.42<br>(9.20-9.65) | 9.44<br>(9.20-9.69) | 9.46<br>(9.20-9.72) | 9.48<br>(9.20-9.75) |
|--------|---------------------|---------------------|---------------------|---------------------|---------------------|---------------------|---------------------|---------------------|---------------------|

|          |                     |                     |                     |                     |                     |                     |                     |                     |                     |
|----------|---------------------|---------------------|---------------------|---------------------|---------------------|---------------------|---------------------|---------------------|---------------------|
| Mongolia | 8.14<br>(8.03-8.25) | 8.07<br>(7.83-8.32) | 8.00<br>(7.59-8.41) | 7.93<br>(7.33-8.53) | 7.86<br>(7.04-8.67) | 7.79<br>(6.74-8.83) | 7.71<br>(6.42-9.01) | 7.64<br>(6.08-9.21) | 7.57<br>(5.72-9.42) |
|----------|---------------------|---------------------|---------------------|---------------------|---------------------|---------------------|---------------------|---------------------|---------------------|

|            |                     |                      |                      |                      |                      |                      |                     |                      |                     |
|------------|---------------------|----------------------|----------------------|----------------------|----------------------|----------------------|---------------------|----------------------|---------------------|
| Montenegro | 9.91<br>(9.84-9.97) | 9.90<br>(9.76-10.04) | 9.90<br>(9.67-10.12) | 9.90<br>(9.57-10.22) | 9.89<br>(9.46-10.33) | 9.89<br>(9.33-10.45) | 9.88<br>(9.2-10.57) | 9.88<br>(9.05-10.71) | 9.88<br>(8.9-10.85) |
|------------|---------------------|----------------------|----------------------|----------------------|----------------------|----------------------|---------------------|----------------------|---------------------|

|         |                        |                        |                        |                        |                        |                        |                        |                        |                       |
|---------|------------------------|------------------------|------------------------|------------------------|------------------------|------------------------|------------------------|------------------------|-----------------------|
| Morocco | 11.02<br>(10.98-11.07) | 10.99<br>(10.91-11.06) | 10.95<br>(10.82-11.07) | 10.89<br>(10.72-11.06) | 10.83<br>(10.60-11.06) | 10.75<br>(10.46-11.04) | 10.66<br>(10.30-11.01) | 10.55<br>(10.12-10.97) | 10.43<br>(9.93-10.93) |
|---------|------------------------|------------------------|------------------------|------------------------|------------------------|------------------------|------------------------|------------------------|-----------------------|

|                  |                        |                        |                        |                        |                        |                        |                        |                        |                        |
|------------------|------------------------|------------------------|------------------------|------------------------|------------------------|------------------------|------------------------|------------------------|------------------------|
| Mozambique       | 8.09<br>(7.98-8.20)    | 8.24<br>(8.02-8.46)    | 8.39<br>(8.03-8.76)    | 8.54<br>(8.02-9.07)    | 8.69<br>(7.99-9.39)    | 8.84<br>(7.95-9.74)    | 8.99<br>(7.89-10.10)   | 9.15<br>(7.82-10.47)   | 9.30<br>(7.73-10.86)   |
| Namibia          | 8.37<br>(8.23-8.50)    | 8.43<br>(8.12-8.73)    | 8.49<br>(7.98-9.00)    | 8.55<br>(7.81-9.29)    | 8.61<br>(7.61-9.62)    | 8.68<br>(7.39-9.96)    | 8.74<br>(7.15-10.33)   | 8.80<br>(6.88-10.72)   | 8.86<br>(6.59-11.13)   |
| Netherlands      | 10.93<br>(10.89-10.98) | 10.93<br>(10.83-11.02) | 10.92<br>(10.77-11.07) | 10.91<br>(10.70-11.13) | 10.91<br>(10.62-11.20) | 10.90<br>(10.53-11.27) | 10.89<br>(10.43-11.35) | 10.89<br>(10.34-11.43) | 10.88<br>(10.23-11.53) |
| new Zealand      | 10.70<br>(10.65-10.75) | 10.72<br>(10.64-10.79) | 10.73<br>(10.63-10.82) | 10.74<br>(10.63-10.84) | 10.74<br>(10.62-10.86) | 10.75<br>(10.62-10.88) | 10.75<br>(10.61-10.89) | 10.75<br>(10.60-10.90) | 10.75<br>(10.59-10.91) |
| Nicaragua        | 9.43<br>(9.24-9.62)    | 9.46<br>(9.27-9.65)    | 9.49<br>(9.30-9.68)    | 9.52<br>(9.32-9.71)    | 9.54<br>(9.35-9.74)    | 9.57<br>(9.38-9.77)    | 9.60<br>(9.40-9.80)    | 9.63<br>(9.43-9.83)    | 9.66<br>(9.46-9.85)    |
| Niger            | 7.70<br>(7.66-7.75)    | 7.75<br>(7.68-7.81)    | 7.79<br>(7.71-7.88)    | 7.84<br>(7.73-7.95)    | 7.88<br>(7.74-8.02)    | 7.92<br>(7.76-8.09)    | 7.97<br>(7.77-8.17)    | 8.01<br>(7.78-8.24)    | 8.06<br>(7.79-8.32)    |
| Nigeria          | 8.84<br>(8.75-8.92)    | 8.93<br>(8.77-9.10)    | 9.03<br>(8.77-9.29)    | 9.13<br>(8.76-9.49)    | 9.22<br>(8.74-9.71)    | 9.32<br>(8.71-9.93)    | 9.42<br>(8.66-10.17)   | 9.51<br>(8.61-10.41)   | 9.61<br>(8.55-10.66)   |
| Norway           | 10.64<br>(10.59-10.69) | 10.67<br>(10.60-10.74) | 10.70<br>(10.61-10.79) | 10.73<br>(10.63-10.84) | 10.76<br>(10.65-10.88) | 10.80<br>(10.67-10.92) | 10.83<br>(10.69-10.97) | 10.86<br>(10.71-11.01) | 10.89<br>(10.74-11.05) |
| Pakistan         | 9.04<br>(8.92-9.15)    | 9.09<br>(8.93-9.24)    | 9.14<br>(8.95-9.34)    | 9.19<br>(8.95-9.43)    | 9.25<br>(8.95-9.54)    | 9.30<br>(8.95-9.64)    | 9.35<br>(8.95-9.75)    | 9.40<br>(8.94-9.86)    | 9.45<br>(8.93-9.97)    |
| Panama           | 9.58<br>(9.53-9.62)    | 9.61<br>(9.53-9.69)    | 9.65<br>(9.52-9.78)    | 9.69<br>(9.50-9.87)    | 9.72<br>(9.47-9.97)    | 9.76<br>(9.44-10.08)   | 9.80<br>(9.40-10.19)   | 9.83<br>(9.36-10.31)   | 9.87<br>(9.31-10.43)   |
| Papua New Guinea | 7.73<br>(7.64-7.82)    | 7.79<br>(7.66-7.91)    | 7.85<br>(7.69-8.01)    | 7.91<br>(7.70-8.12)    | 7.97<br>(7.72-8.23)    | 8.04<br>(7.73-8.34)    | 8.10<br>(7.74-8.46)    | 8.16<br>(7.74-8.58)    | 8.22<br>(7.75-8.70)    |
| Paraguay         | 9.52<br>(9.49-9.56)    | 9.53<br>(9.48-9.58)    | 9.53<br>(9.47-9.60)    | 9.54<br>(9.47-9.61)    | 9.54<br>(9.46-9.62)    | 9.55<br>(9.46-9.64)    | 9.55<br>(9.46-9.65)    | 9.56<br>(9.46-9.66)    | 9.56<br>(9.46-9.67)    |

(Continue to next page)

---

|      |      |      |      |      |      |      |      |      |
|------|------|------|------|------|------|------|------|------|
| 2017 | 2018 | 2019 | 2020 | 2021 | 2022 | 2023 | 2024 | 2025 |
|------|------|------|------|------|------|------|------|------|

---

(Continued from previous page)

|                                     |               |               |               |               |               |               |               |               |               |
|-------------------------------------|---------------|---------------|---------------|---------------|---------------|---------------|---------------|---------------|---------------|
| Peru                                | 9.96          | 10.03         | 10.09         | 10.15         | 10.22         | 10.28         | 10.34         | 10.41         | 10.47         |
|                                     | (9.84-10.08)  | (9.86-10.19)  | (9.88-10.29)  | (9.92-10.39)  | (9.95-10.48)  | (9.99-10.57)  | (10.03-10.66) | (10.07-10.74) | (10.12-10.83) |
| Philippines                         | 8.46          | 8.46          | 8.46          | 8.46          | 8.46          | 8.46          | 8.46          | 8.46          | 8.46          |
|                                     | (8.40-8.52)   | (8.38-8.54)   | (8.36-8.56)   | (8.35-8.57)   | (8.33-8.59)   | (8.32-8.60)   | (8.31-8.61)   | (8.30-8.62)   | (8.29-8.63)   |
| Poland                              | 10.37         | 10.41         | 10.44         | 10.47         | 10.50         | 10.53         | 10.56         | 10.58         | 10.60         |
|                                     | (10.24-10.50) | (10.22-10.59) | (10.21-10.67) | (10.21-10.74) | (10.21-10.80) | (10.21-10.85) | (10.21-10.91) | (10.21-10.95) | (10.21-11.00) |
| Portugal                            | 10.49         | 10.48         | 10.47         | 10.46         | 10.45         | 10.44         | 10.43         | 10.42         | 10.41         |
|                                     | (10.43-10.55) | (10.40-10.57) | (10.35-10.59) | (10.29-10.63) | (10.22-10.68) | (10.15-10.73) | (10.07-10.79) | (9.99-10.85)  | (9.90-10.92)  |
| Qatar                               | 11.64         | 11.56         | 11.48         | 11.41         | 11.33         | 11.25         | 11.18         | 11.10         | 11.02         |
|                                     | (11.56-11.71) | (11.39-11.73) | (11.20-11.77) | (10.99-11.82) | (10.76-11.89) | (10.53-11.98) | (10.27-12.08) | (10.01-12.19) | (9.74-12.31)  |
| Republic of<br>Congo                | 8.37          | 8.40          | 8.44          | 8.48          | 8.51          | 8.55          | 8.58          | 8.62          | 8.66          |
|                                     | (8.17-8.57)   | (8.20-8.61)   | (8.24-8.64)   | (8.27-8.68)   | (8.31-8.72)   | (8.34-8.75)   | (8.38-8.79)   | (8.41-8.83)   | (8.45-8.86)   |
| Republic of<br>Guinea-Bissau        | 7.44          | 7.52          | 7.61          | 7.70          | 7.79          | 7.88          | 7.98          | 8.08          | 8.19          |
|                                     | (7.34-7.55)   | (7.38-7.67)   | (7.43-7.79)   | (7.49-7.90)   | (7.55-8.02)   | (7.63-8.14)   | (7.70-8.26)   | (7.79-8.38)   | (7.87-8.50)   |
| Republic of<br>Korea                | 10.17         | 10.10         | 10.03         | 9.96          | 9.89          | 9.82          | 9.75          | 9.68          | 9.61          |
|                                     | (10.05-10.29) | (9.87-10.32)  | (9.68-10.37)  | (9.47-10.44)  | (9.25-10.52)  | (9.01-10.62)  | (8.77-10.73)  | (8.51-10.85)  | (8.24-10.97)  |
| Romania                             | 9.90          | 9.96          | 10.01         | 10.07         | 10.13         | 10.18         | 10.24         | 10.30         | 10.35         |
|                                     | (9.73-10.07)  | (9.79-10.13)  | (9.84-10.18)  | (9.90-10.24)  | (9.95-10.30)  | (10.01-10.36) | (10.07-10.42) | (10.12-10.47) | (10.18-10.53) |
| Rwanda                              | 8.39          | 8.52          | 8.64          | 8.76          | 8.89          | 9.01          | 9.14          | 9.26          | 9.38          |
|                                     | (8.14-8.64)   | (8.17-8.87)   | (8.21-9.07)   | (8.27-9.26)   | (8.33-9.45)   | (8.40-9.62)   | (8.48-9.80)   | (8.55-9.96)   | (8.63-10.13)  |
| Saint Lucia                         | 9.73          | 9.71          | 9.69          | 9.67          | 9.65          | 9.63          | 9.61          | 9.59          | 9.57          |
|                                     | (9.63-9.83)   | (9.53-9.89)   | (9.41-9.96)   | (9.28-10.05)  | (9.14-10.15)  | (8.99-10.26)  | (8.83-10.38)  | (8.66-10.51)  | (8.48-10.65)  |
| Saint Vincent and<br>the Grenadines | 71.73         | 71.82         | 71.91         | 72.00         | 72.10         | 72.21         | 72.31         | 72.42         | 72.53         |
|                                     | (71.34-72.11) | (71.27-72.36) | (71.24-72.58) | (71.23-72.78) | (71.24-72.97) | (71.26-73.15) | (71.29-73.33) | (71.33-73.51) | (71.38-73.69) |
| Sao Tome and<br>Principe            | 8.97          | 8.99          | 9.01          | 9.03          | 9.05          | 9.07          | 9.09          | 9.11          | 9.13          |
|                                     | (8.88-9.05)   | (8.82-9.15)   | (8.74-9.27)   | (8.66-9.39)   | (8.56-9.53)   | (8.45-9.68)   | (8.33-9.84)   | (8.20-10.01)  | (8.07-10.19)  |
| Saudi Arabia                        | 10.78         | 10.85         | 10.92         | 10.98         | 11.05         | 11.11         | 11.18         | 11.25         | 11.31         |

(10.71-10.85) (10.72-10.98) (10.70-11.13) (10.68-11.28) (10.65-11.44) (10.61-11.61) (10.57-11.79) (10.51-11.98) (10.45-12.17)

|                 |               |               |               |               |               |               |               |               |               |
|-----------------|---------------|---------------|---------------|---------------|---------------|---------------|---------------|---------------|---------------|
| Senegal         | 8.38          | 8.41          | 8.43          | 8.46          | 8.49          | 8.51          | 8.54          | 8.57          | 8.60          |
|                 | (8.31-8.44)   | (8.30-8.51)   | (8.27-8.59)   | (8.24-8.68)   | (8.21-8.77)   | (8.17-8.86)   | (8.13-8.96)   | (8.08-9.06)   | (8.02-9.17)   |
| Seychelles      | 8.77          | 8.80          | 8.84          | 8.88          | 8.92          | 8.95          | 8.99          | 9.03          | 9.07          |
|                 | (8.72-8.81)   | (8.74-8.87)   | (8.76-8.92)   | (8.79-8.97)   | (8.81-9.02)   | (8.84-9.07)   | (8.87-9.11)   | (8.90-9.16)   | (8.93-9.20)   |
| Sierra Leone    | 7.32          | 7.35          | 7.38          | 7.40          | 7.43          | 7.46          | 7.49          | 7.52          | 7.54          |
|                 | (6.96-7.68)   | (6.99-7.71)   | (7.01-7.74)   | (7.04-7.77)   | (7.06-7.80)   | (7.09-7.83)   | (7.12-7.86)   | (7.14-7.89)   | (7.17-7.92)   |
| Singapore       | 10.16         | 10.22         | 10.27         | 10.33         | 10.38         | 10.43         | 10.49         | 10.54         | 10.60         |
|                 | (10.08-10.25) | (10.09-10.34) | (10.12-10.43) | (10.15-10.50) | (10.18-10.58) | (10.22-10.65) | (10.26-10.72) | (10.29-10.79) | (10.33-10.86) |
| Slovak Republic | 10.13         | 10.17         | 10.22         | 10.26         | 10.30         | 10.35         | 10.39         | 10.43         | 10.48         |
|                 | (10.03-10.22) | (10.04-10.30) | (10.05-10.38) | (10.07-10.45) | (10.09-10.51) | (10.12-10.58) | (10.14-10.64) | (10.17-10.70) | (10.19-10.76) |
| Slovenia        | 11.50         | 11.47         | 11.45         | 11.43         | 11.41         | 11.39         | 11.36         | 11.34         | 11.32         |
|                 | (11.40-11.59) | (11.30-11.65) | (11.18-11.72) | (11.06-11.80) | (10.92-11.89) | (10.78-11.99) | (10.62-12.10) | (10.46-12.22) | (10.29-12.35) |
| Solomon Islands | 7.79          | 7.84          | 7.89          | 7.94          | 7.99          | 8.04          | 8.09          | 8.14          | 8.19          |
|                 | (7.74-7.84)   | (7.75-7.93)   | (7.76-8.02)   | (7.76-8.12)   | (7.76-8.22)   | (7.75-8.33)   | (7.74-8.44)   | (7.72-8.56)   | (7.70-8.68)   |
| South Africa    | 8.74          | 8.88          | 9.02          | 9.15          | 9.29          | 9.43          | 9.57          | 9.70          | 9.84          |
|                 | (8.59-8.90)   | (8.54-9.22)   | (8.46-9.57)   | (8.35-9.96)   | (8.20-10.38)  | (8.03-10.83)  | (7.83-11.30)  | (7.61-11.79)  | (7.37-12.30)  |

(Continue to next page)

---

| 2017 | 2018 | 2019 | 2020 | 2021 | 2022 | 2023 | 2024 | 2025 |
|------|------|------|------|------|------|------|------|------|
|------|------|------|------|------|------|------|------|------|

---

(Continued from previous page)

|           |               |               |               |               |               |               |               |               |               |
|-----------|---------------|---------------|---------------|---------------|---------------|---------------|---------------|---------------|---------------|
| Spain     | 83.16         | 83.34         | 83.52         | 83.69         | 83.86         | 84.03         | 84.19         | 84.35         | 84.51         |
|           | (82.99-83.32) | (83.10-83.58) | (83.22-83.81) | (83.35-84.03) | (83.48-84.24) | (83.61-84.44) | (83.74-84.64) | (83.87-84.83) | (84.00-85.01) |
| Sri Lanka | 9.66          | 9.71          | 9.75          | 9.79          | 9.84          | 9.88          | 9.92          | 9.97          | 10.01         |
|           | (9.26-10.06)  | (9.30-10.11)  | (9.35-10.15)  | (9.39-10.20)  | (9.43-10.24)  | (9.48-10.28)  | (9.52-10.33)  | (9.56-10.37)  | (9.61-10.41)  |
| Sudan     | 10.17         | 10.22         | 10.27         | 10.31         | 10.36         | 10.40         | 10.44         | 10.49         | 10.53         |
|           | (10.10-10.24) | (10.12-10.32) | (10.14-10.39) | (10.17-10.46) | (10.19-10.52) | (10.22-10.58) | (10.25-10.64) | (10.28-10.69) | (10.31-10.75) |

|                        |               |               |               |               |               |               |               |               |               |
|------------------------|---------------|---------------|---------------|---------------|---------------|---------------|---------------|---------------|---------------|
| Suriname               | 9.13          | 9.16          | 9.20          | 9.23          | 9.27          | 9.30          | 9.34          | 9.37          | 9.41          |
|                        | (9.08-9.18)   | (9.06-9.27)   | (9.04-9.36)   | (9.00-9.47)   | (8.96-9.58)   | (8.91-9.69)   | (8.86-9.82)   | (8.79-9.95)   | (8.73-10.09)  |
| Swaziland              | 8.15          | 8.49          | 8.82          | 9.15          | 9.49          | 9.82          | 10.16         | 10.49         | 10.82         |
|                        | (7.92-8.38)   | (7.98-8.99)   | (7.99-9.64)   | (7.96-10.35)  | (7.88-11.10)  | (7.76-11.88)  | (7.61-12.70)  | (7.42-13.56)  | (7.21-14.44)  |
| Sweden                 | 11.20         | 11.23         | 11.27         | 11.31         | 11.34         | 11.38         | 11.42         | 11.45         | 11.49         |
|                        | (11.16-11.24) | (11.18-11.29) | (11.20-11.34) | (11.22-11.39) | (11.25-11.44) | (11.28-11.48) | (11.31-11.53) | (11.33-11.57) | (11.36-11.61) |
| Switzerland            | 11.19         | 11.13         | 11.08         | 11.02         | 10.97         | 10.91         | 10.86         | 10.80         | 10.75         |
|                        | (11.12-11.26) | (10.99-11.28) | (10.84-11.32) | (10.67-11.38) | (10.49-11.45) | (10.30-11.53) | (10.10-11.62) | (9.89-11.72)  | (9.67-11.83)  |
| Tajikistan             | 8.76          | 8.82          | 8.89          | 8.95          | 9.01          | 9.07          | 9.13          | 9.20          | 9.26          |
|                        | (8.61-8.91)   | (8.63-9.02)   | (8.64-9.13)   | (8.64-9.25)   | (8.65-9.37)   | (8.64-9.50)   | (8.63-9.63)   | (8.62-9.77)   | (8.61-9.91)   |
| Tanzania               | 7.86          | 7.96          | 8.05          | 8.15          | 8.25          | 8.35          | 8.45          | 8.54          | 8.64          |
|                        | (7.78-7.94)   | (7.78-8.13)   | (7.76-8.35)   | (7.73-8.58)   | (7.68-8.82)   | (7.61-9.08)   | (7.54-9.36)   | (7.45-9.64)   | (7.35-9.94)   |
| Thailand               | 9.75          | 9.73          | 9.70          | 9.68          | 9.65          | 9.63          | 9.61          | 9.58          | 9.56          |
|                        | (9.67-9.83)   | (9.58-9.88)   | (9.47-9.94)   | (9.35-10.01)  | (9.22-10.09)  | (9.08-10.18)  | (8.93-10.28)  | (8.78-10.39)  | (8.61-10.51)  |
| The Russian Federation | 8.85          | 8.74          | 8.63          | 8.52          | 8.41          | 8.30          | 8.19          | 8.08          | 7.97          |
|                        | (8.59-9.10)   | (8.21-9.26)   | (7.78-9.48)   | (7.29-9.74)   | (6.77-10.05)  | (6.20-10.39)  | (5.60-10.77)  | (4.97-11.18)  | (4.31-11.63)  |
| Togo                   | 7.77          | 7.82          | 7.87          | 7.92          | 7.97          | 8.02          | 8.07          | 8.12          | 8.17          |
|                        | (7.66-7.88)   | (7.64-8.00)   | (7.62-8.12)   | (7.59-8.24)   | (7.56-8.37)   | (7.53-8.51)   | (7.49-8.64)   | (7.45-8.79)   | (7.40-8.93)   |
| Tonga                  | 9.17          | 9.20          | 9.22          | 9.25          | 9.27          | 9.30          | 9.33          | 9.35          | 9.38          |
|                        | (9.01-9.33)   | (9.03-9.36)   | (9.06-9.39)   | (9.08-9.41)   | (9.11-9.44)   | (9.14-9.46)   | (9.16-9.49)   | (9.19-9.51)   | (9.21-9.54)   |
| Trinidad and Tobago    | 9.51          | 9.52          | 9.53          | 9.53          | 9.54          | 9.55          | 9.55          | 9.56          | 9.56          |
|                        | (9.44-9.59)   | (9.38-9.66)   | (9.31-9.75)   | (9.23-9.84)   | (9.14-9.94)   | (9.04-10.05)  | (8.94-10.16)  | (8.83-10.29)  | (8.71-10.41)  |
| Tunisia                | 10.80         | 10.74         | 10.58         | 10.52         | 10.45         | 10.39         | 10.32         | 10.25         | 10.19         |
|                        | (10.76-10.84) | (10.65-10.84) | (10.42-10.74) | (10.28-10.75) | (10.13-10.77) | (9.98-10.79)  | (9.82-10.82)  | (9.65-10.86)  | (9.47-10.91)  |
| Turkey                 | 11.54         | 11.52         | 11.49         | 11.45         | 11.40         | 11.35         | 11.29         | 11.22         | 11.15         |
|                        | (11.24-11.84) | (11.10-11.94) | (10.97-12.00) | (10.85-12.04) | (10.74-12.07) | (10.62-12.08) | (10.50-12.08) | (10.38-12.07) | (10.25-12.04) |
| Turkmenistan           | 8.20          | 8.23          | 8.25          | 8.27          | 8.29          | 8.31          | 8.33          | 8.35          | 8.37          |

|                      |               |               |               |               |               |               |               |               |               |
|----------------------|---------------|---------------|---------------|---------------|---------------|---------------|---------------|---------------|---------------|
|                      | (8.16-8.25)   | (8.13-8.32)   | (8.09-8.40)   | (8.04-8.49)   | (7.99-8.59)   | (7.92-8.70)   | (7.85-8.81)   | (7.77-8.94)   | (7.68-9.06)   |
| Uganda               | 7.93          | 8.01          | 8.09          | 8.17          | 8.24          | 8.32          | 8.40          | 8.48          | 8.55          |
|                      | (7.84-8.03)   | (7.88-8.14)   | (7.93-8.25)   | (7.98-8.35)   | (8.03-8.45)   | (8.09-8.55)   | (8.15-8.65)   | (8.21-8.74)   | (8.27-8.84)   |
| Ukraine              | 9.14          | 9.21          | 9.28          | 9.35          | 9.42          | 9.50          | 9.58          | 9.66          | 9.74          |
|                      | (8.88-9.40)   | (8.84-9.57)   | (8.83-9.72)   | (8.83-9.87)   | (8.85-10.00)  | (8.87-10.13)  | (8.90-10.26)  | (8.93-10.39)  | (8.97-10.52)  |
| United Arab Emirates | 10.39         | 10.36         | 10.32         | 10.28         | 10.24         | 10.20         | 10.16         | 10.12         | 10.09         |
|                      | (10.32-10.47) | (10.21-10.51) | (10.08-10.55) | (9.95-10.61)  | (9.81-10.67)  | (9.66-10.75)  | (9.50-10.83)  | (9.33-10.92)  | (9.15-11.02)  |
| United Kingdom       | 10.43         | 10.43         | 10.43         | 10.43         | 10.43         | 10.43         | 10.43         | 10.43         | 10.43         |
|                      | (10.36-10.50) | (10.34-10.53) | (10.31-10.55) | (10.30-10.57) | (10.28-10.59) | (10.26-10.60) | (10.25-10.61) | (10.24-10.63) | (10.23-10.64) |
| United States        | 11.16         | 11.16         | 11.16         | 11.16         | 11.15         | 11.15         | 11.15         | 11.15         | 11.14         |
|                      | (11.12-11.21) | (11.07-11.25) | (11.01-11.31) | (10.94-11.37) | (10.86-11.44) | (10.78-11.52) | (10.69-11.61) | (10.59-11.70) | (10.49-11.80) |

(Continue to next page)

|                                | 2017        | 2018        | 2019        | 2020        | 2021        | 2022        | 2023        | 2024        | 2025        |
|--------------------------------|-------------|-------------|-------------|-------------|-------------|-------------|-------------|-------------|-------------|
| (Continued from previous page) |             |             |             |             |             |             |             |             |             |
| Uruguay                        | 9.43        | 9.46        | 9.50        | 9.53        | 9.57        | 9.60        | 9.64        | 9.67        | 9.71        |
|                                | (9.38-9.48) | (9.39-9.54) | (9.41-9.59) | (9.43-9.64) | (9.45-9.69) | (9.47-9.73) | (9.50-9.78) | (9.52-9.82) | (9.55-9.87) |
| US Virgin Islands              | 9.09        | 9.11        | 9.13        | 9.14        | 9.16        | 9.17        | 9.19        | 9.20        | 9.22        |
|                                | (9.06-9.13) | (9.07-9.16) | (9.07-9.18) | (9.08-9.21) | (9.09-9.23) | (9.10-9.25) | (9.11-9.27) | (9.11-9.29) | (9.12-9.31) |
| Uzbekistan                     | 8.49        | 8.48        | 8.48        | 8.48        | 8.48        | 8.48        | 8.47        | 8.47        | 8.47        |
|                                | (8.43-8.54) | (8.36-8.61) | (8.27-8.69) | (8.17-8.79) | (8.06-8.89) | (7.94-9.01) | (7.81-9.14) | (7.67-9.27) | (7.52-9.42) |
| Vanuatu                        | 7.93        | 7.96        | 7.99        | 8.01        | 8.04        | 8.07        | 8.10        | 8.12        | 8.15        |
|                                | (7.79-8.07) | (7.80-8.12) | (7.79-8.18) | (7.79-8.24) | (7.78-8.30) | (7.77-8.37) | (7.76-8.44) | (7.74-8.50) | (7.73-8.58) |
| Venezuela                      | 8.97        | 9.00        | 9.02        | 9.05        | 9.07        | 9.10        | 9.12        | 9.15        | 9.17        |
|                                | (8.70-9.24) | (8.73-9.26) | (8.75-9.29) | (8.78-9.32) | (8.80-9.34) | (8.82-9.37) | (8.85-9.40) | (8.87-9.42) | (8.90-9.45) |
| Vietnam                        | 8.66        | 8.68        | 8.70        | 8.73        | 8.75        | 8.77        | 8.79        | 8.81        | 8.83        |
|                                | (8.63-8.69) | (8.63-8.73) | (8.64-8.76) | (8.66-8.79) | (8.67-8.82) | (8.69-8.85) | (8.70-8.88) | (8.72-8.91) | (8.73-8.94) |

|          |                     |                     |                     |                     |                     |                     |                      |                      |                      |
|----------|---------------------|---------------------|---------------------|---------------------|---------------------|---------------------|----------------------|----------------------|----------------------|
| Zambia   | 7.29<br>(7.15-7.43) | 7.42<br>(7.15-7.69) | 7.55<br>(7.12-7.98) | 7.68<br>(7.08-8.28) | 7.81<br>(7.01-8.61) | 7.94<br>(6.92-8.95) | 8.07<br>(6.82-9.31)  | 8.19<br>(6.71-9.68)  | 8.32<br>(6.58-10.07) |
| Zimbabwe | 7.33<br>(7.15-7.50) | 7.53<br>(7.17-7.89) | 7.73<br>(7.14-8.32) | 7.93<br>(7.08-8.78) | 8.13<br>(7.00-9.27) | 8.34<br>(6.89-9.79) | 8.54<br>(6.75-10.33) | 8.74<br>(6.59-10.89) | 8.94<br>(6.41-11.47) |

---
